# Supplementary material for: Biodegradation of Benzo[a]pyrene by a White-Rot Fungus Phlebia acerina: Surfactant-Enhanced Degradation and Possible Genes Involved
Source: MDPI journal article supplement (doi:10.3390/jof9100978), 2023-09-28
Supplement: s1 [file s1]

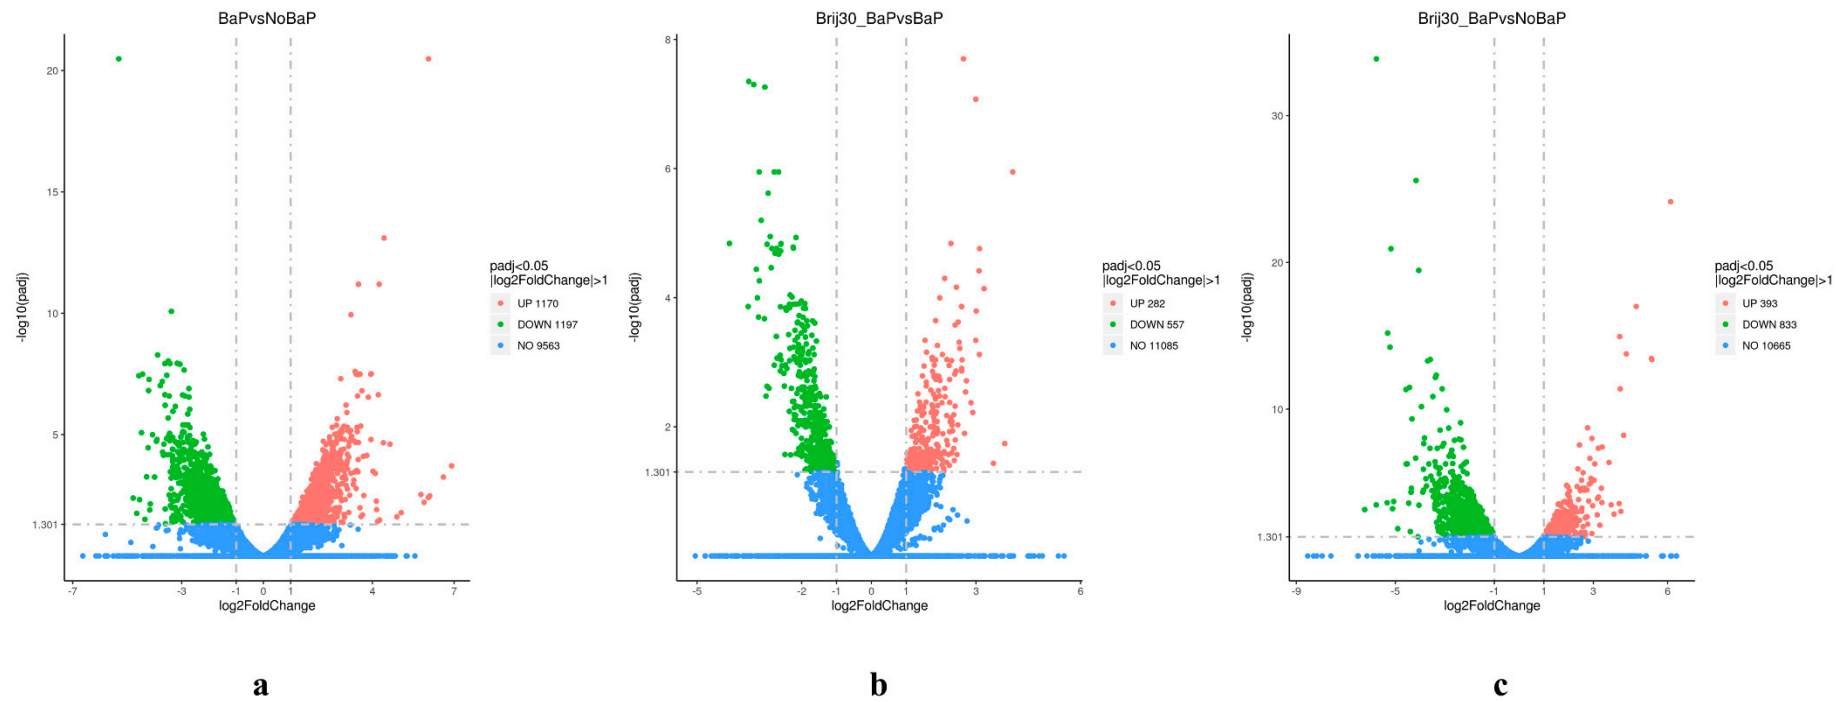

**Figure S1.** DEGs in the degradation of BaP by *P. aerina* S-LWZ20190614-6. Blue spots represent genes without significant expression. Red spots mean 2-fold up-regulated genes. Green spots represent significantly 2-fold down-regulated genes. **a:** BaP vs NoBaP; **b:** Brij30\_BaP vs BaP; **c:** Brij30\_BaP vs NoBaP.

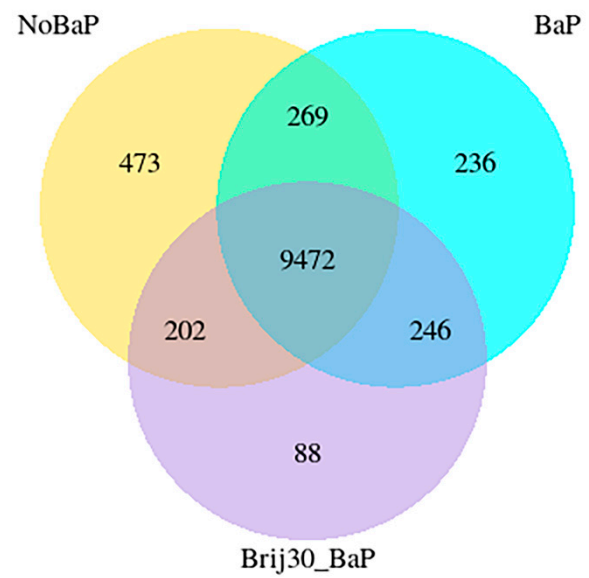

**Figure S2.** Venn diagram of the numbers of DEGs found in the comparisons of BaP, NoBaP, and Brij30\_BaP in the degradation of BaP by *P. acerina* S-LWZ20190614-6.



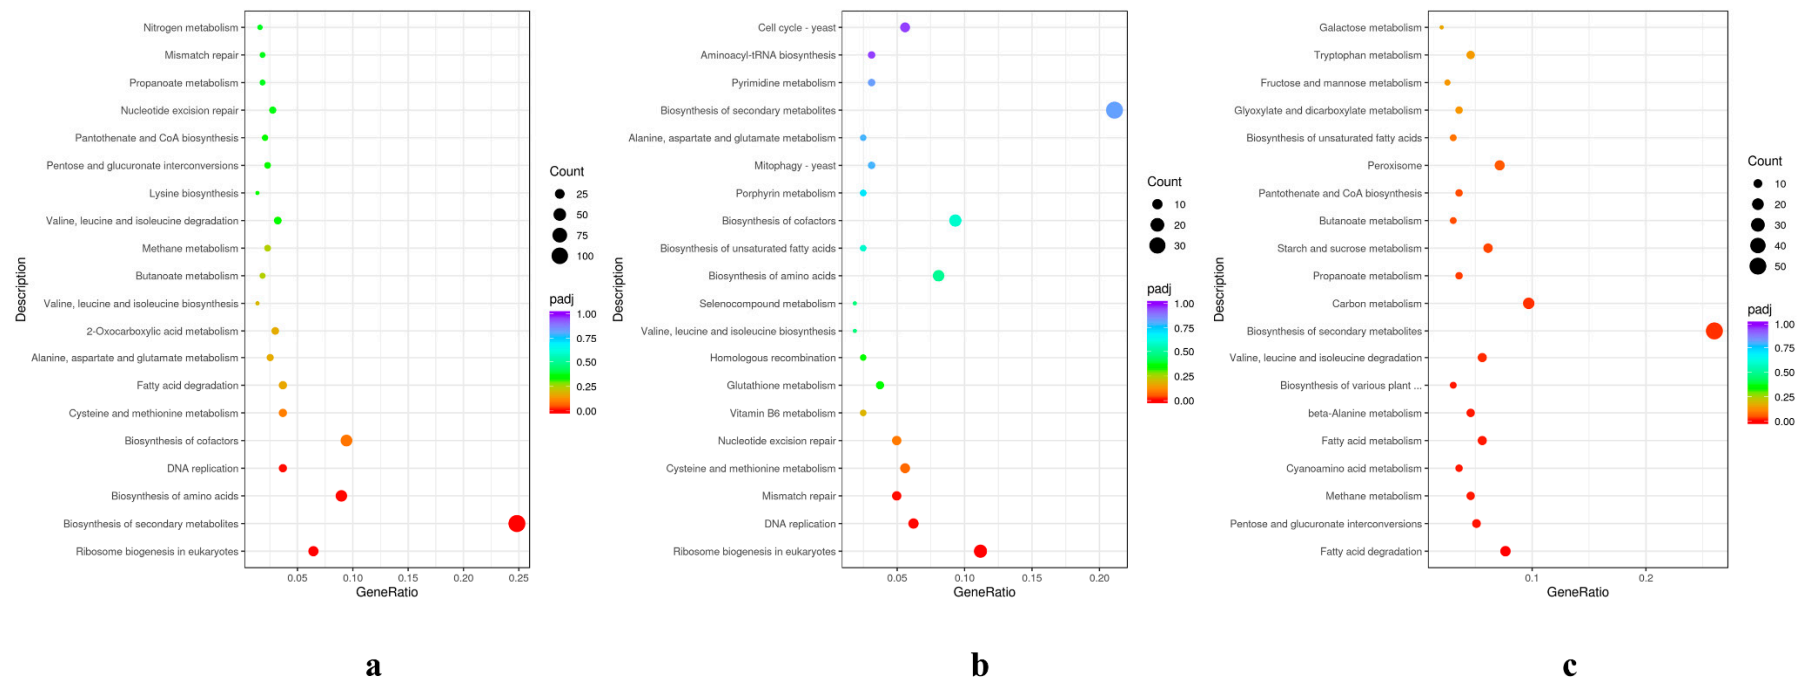

**Figure S4.** Enriched KEGG pathways of upregulated DEGs. **a:** BaP vs NoBaP; **b:** Brij30\_BaP vs BaP; **c:** Brij30\_BaP vs NoBaP.

**Table S1.** Basic data results of transcriptome analysis

| Sample       | Raw Reads | Clean Reads | Clean Bases | Error Rate (%) | Q20 (%) | Q30 (%) | GC Content (%) |
|--------------|-----------|-------------|-------------|----------------|---------|---------|----------------|
| NoBaP_1      | 41273312  | 39516912    | 5.93 G      | 0.03           | 96.04   | 90.34   | 59.66          |
| NoBaP_2      | 45199146  | 43880020    | 6.58 G      | 0.03           | 96.03   | 90.33   | 59.15          |
| NoBaP_3      | 41897470  | 40713928    | 6.11 G      | 0.03           | 95.93   | 90.09   | 59.73          |
| BaP_1        | 43506490  | 42351378    | 6.35 G      | 0.03           | 96.01   | 90.28   | 59.54          |
| BaP_2        | 40949626  | 39725090    | 5.96 G      | 0.03           | 95.96   | 90.19   | 59.64          |
| BaP_3        | 42111774  | 41252706    | 6.19 G      | 0.03           | 96.00   | 90.24   | 59.42          |
| Brij30_BaP_1 | 39584900  | 38571448    | 5.79 G      | 0.03           | 95.88   | 89.95   | 59.54          |
| Brij30_BaP_2 | 43074160  | 41917706    | 6.29 G      | 0.03           | 95.97   | 90.20   | 59.74          |
| Brij30_BaP_3 | 42068172  | 41090796    | 6.16 G      | 0.03           | 95.91   | 89.96   | 59.63          |

**Table S2** Expression of genes in the BaP and NoBaP comparisons

| gene_id                               | BaP      | NoBaP    | log <sub>2</sub> FoldChange | Pvalue   | padj     | gene_length | gene_description                                                                                                                                                                                                                |
|---------------------------------------|----------|----------|-----------------------------|----------|----------|-------------|---------------------------------------------------------------------------------------------------------------------------------------------------------------------------------------------------------------------------------|
| Lachesis_group0__13_contigs__l.g8359  | 1835.348 | 27.59259 | 6.060938                    | 3.91E-25 | 3.30E-21 | 789         | - && Q91XV4.1 RecName: Full=L-xylulose reductase; Short=XR; AltName: Full=Dicarbonyl/L-xylulose reductase; AltName: Full=Sperm antigen P26h && PF00106:short chain dehydrogenase                                                |
| Lachesis_group0__13_contigs__l.g7710  | 23.5419  | 0.358443 | 5.781563                    | 0.000203 | 0.002956 | 933         | - && O94480.1 RecName: Full=25S rRNA (uridine-N(3))-methyltransferase && PF10354:Domain of unknown function (DUF2431)                                                                                                           |
| Lachesis_group0__13_contigs__l.g5207  | 205.9655 | 11.05565 | 4.217337                    | 6.61E-10 | 2.28E-07 | 954         | - && Q5U209.1 RecName: Full=Ribonuclease H2 subunit A; Short=RNase H2 subunit A; AltName: Full=Ribonuclease HI large subunit; Short=RNase HI large subunit; AltName: Full=Ribonuclease HI subunit A && PF01351:Ribonuclease HII |
| Lachesis_group0__13_contigs__l.g7799  | 70.87416 | 3.942875 | 4.112041                    | 1.26E-05 | 0.000399 | 576         | - && - && PF05207:CSL zinc finger PF06912:Protein of unknown function (DUF1275)                                                                                                                                                 |
| Lachesis_group0__13_contigs__l.g10188 | 223.1278 | 14.26844 | 3.951414                    | 1.38E-07 | 1.59E-05 | 1290        | - && Q5BK68.1 RecName: Full=snRNA-activating protein complex subunit 3; Short=SNAPc subunit 3; AltName: Full=Small nuclear RNA-activating complex polypeptide 3 && PF12251:snRNA-activating protein of 50kDa MW C terminal      |
| Lachesis_group0__13_contigs__l.g8566  | 302.504  | 19.81682 | 3.93838                     | 5.96E-11 | 3.26E-08 | 1047        | - && - && PF07574:Nse1 non-SMC component of SMC5-6 complex PF08746:RING-like domain                                                                                                                                             |
| Lachesis_group0__13_contigs__l.g10926 | 101.0314 | 7.153265 | 3.795126                    | 1.16E-06 | 7.27E-05 | 1524        | - && P36146.1 RecName: Full=Protein LAS1 && PF04031:Las1-like                                                                                                                                                                   |

|                                      |          |          |          |          |          |      |                                                                                                                                               |
|--------------------------------------|----------|----------|----------|----------|----------|------|-----------------------------------------------------------------------------------------------------------------------------------------------|
| Lachesis_group0__13_contigs__l.g5502 | 233.822  | 18.95925 | 3.616171 | 4.27E-10 | 1.56E-07 | 1629 | - && Q09887.1 RecName: Full=Uncharacterized amino-acid permease C584.13 && PF13520:Amino acid permease                                        |
| Lachesis_group0__13_contigs__l.g2225 | 1060.176 | 88.81395 | 3.574578 | 2.15E-08 | 4.44E-06 | 1257 | - && Q01752.1 RecName: Full=Aryl-alcohol dehydrogenase [NADP(+)]; Short=AAD && PF00248:Aldo/keto reductase family                             |
| Lachesis_group0__13_contigs__l.g4640 | 583.7243 | 49.77651 | 3.548383 | 5.30E-11 | 3.23E-08 | 1881 | - && - && PF12937:F-box-like                                                                                                                  |
| Lachesis_group0__13_contigs__l.g9363 | 26.85916 | 2.226847 | 3.543837 | 0.001187 | 0.010357 | 1479 | - && O69763.1 RecName: Full=Vanillin dehydrogenase && PF00171:Aldehyde dehydrogenase family                                                   |
| Lachesis_group0__13_contigs__l.g4699 | 27593.83 | 2456.891 | 3.489495 | 2.92E-15 | 6.40E-12 | 1041 | - && - && PF00702:haloacid dehalogenase-like hydrolase                                                                                        |
| Lachesis_group0__13_contigs__l.g4744 | 186.6332 | 16.73651 | 3.487963 | 2.07E-07 | 2.11E-05 | 2280 | - && Q9BY08.1 RecName: Full=Emopamil-binding protein-like; AltName: Full=Emopamil-binding-related protein && PF05241:Emopamil binding protein |
| Lachesis_group0__13_contigs__l.g3554 | 165.046  | 14.82331 | 3.48065  | 2.04E-06 | 0.000107 | 753  | - && Q9P7C8.1 RecName: Full=DNA replication complex GINS protein sld5 && PF16922:DNA replication complex GINS protein SLD5 C-terminus         |
| Lachesis_group0__13_contigs__l.g4308 | 68.07137 | 6.227718 | 3.474926 | 9.98E-06 | 0.000342 | 630  | - && Q8K396.1 RecName: Full=Meiotic nuclear division protein 1 homolog && PF03962:Mnd1 family                                                 |
| Lachesis_group0__13_contigs__l.g5326 | 926.5655 | 83.7782  | 3.467792 | 6.50E-11 | 3.39E-08 | 1788 | - && Q870L3.1 RecName: Full=Siderophore iron transporter mirC; AltName: Full=Major facilitator iron-regulated transporter C && -              |
| Lachesis_group0__13_contigs__l.g5556 | 329.0505 | 30.16654 | 3.447901 | 4.42E-08 | 7.56E-06 | 732  | - && - && PF03070:TENA/THI-4/PQQC family                                                                                                      |
| Lachesis_group0__13_contigs__l.g5709 | 133.9542 | 12.45338 | 3.432895 | 2.60E-08 | 5.01E-06 | 2832 | - && - && PF00533:BRCA1 C Terminus (BRCT) domain PF12738:twin BRCT domain                                                                     |

|                                       |          |          |          |          |          |      |                                                                                                                                                                                                                                                                                                                                                                                                                                                                                                                                                                                                                                                                                                                                                                  |
|---------------------------------------|----------|----------|----------|----------|----------|------|------------------------------------------------------------------------------------------------------------------------------------------------------------------------------------------------------------------------------------------------------------------------------------------------------------------------------------------------------------------------------------------------------------------------------------------------------------------------------------------------------------------------------------------------------------------------------------------------------------------------------------------------------------------------------------------------------------------------------------------------------------------|
| Lachesis_group0__13_contigs__l.g4605  | 130.0551 | 11.92731 | 3.427271 | 8.21E-06 | 0.000299 | 1251 | - && Q24168.2 RecName: Full=Origin recognition complex subunit 2; Short=DmORC2 && PF04084:Origin recognition complex subunit 2                                                                                                                                                                                                                                                                                                                                                                                                                                                                                                                                                                                                                                   |
| Lachesis_group0__13_contigs__l.g1296  | 1341.261 | 129.7398 | 3.368592 | 3.43E-11 | 2.51E-08 | 1386 | - && C5PEI9.1 RecName: Full=Aspartic protease PEP3; Flags: Precursor && PF00026:Eukaryotic aspartyl protease                                                                                                                                                                                                                                                                                                                                                                                                                                                                                                                                                                                                                                                     |
| Lachesis_group0__13_contigs__l.g11694 | 98.0378  | 9.494393 | 3.350437 | 1.04E-05 | 0.000351 | 741  | - && - && PF00808:Histone-like transcription factor (CBF/NF-Y) and archaeal histone                                                                                                                                                                                                                                                                                                                                                                                                                                                                                                                                                                                                                                                                              |
| Lachesis_group0__13_contigs__l.g10724 | 3277.617 | 326.2902 | 3.328591 | 1.64E-07 | 1.81E-05 | 1872 | - && P1182.3 RecName: Full=Lipoamide acyltransferase component of branched-chain alpha-keto acid dehydrogenase complex, mitochondrial; AltName: Full=52 kDa mitochondrial autoantigen of primary biliary cirrhosis; AltName: Full=Branched chain 2-oxo-acid dehydrogenase complex component E2; Short=BCOADC-E2; AltName: Full=Branched-chain alpha-keto acid dehydrogenase complex component E2; Short=BCKAD-E2; AltName: Full=Dihydrolipoamide acetyltransferase component of branched-chain alpha-keto acid dehydrogenase complex; AltName: Full=Dihydrolipoamide branched chain transacylase; AltName: Full=Dihydrolipoyllysine-residue (2-methylpropanoyl)transferase; Flags: Precursor && PF00364:Biotin-requiring enzyme PF00198:2-oxoacid dehydrogenases |



|                                      |          |          |          |          |          |      |                                                                                                                                                                                                                                                                                                     |
|--------------------------------------|----------|----------|----------|----------|----------|------|-----------------------------------------------------------------------------------------------------------------------------------------------------------------------------------------------------------------------------------------------------------------------------------------------------|
|                                      |          |          |          |          |          |      | acyltransferase (catalytic domain) PF02817:e3 binding domain                                                                                                                                                                                                                                        |
| Lachesis_group0__13_contigs__l.g6383 | 72.3975  | 7.115171 | 3.32028  | 3.09E-05 | 0.000754 | 1746 | - && - && PF12937:F-box-like                                                                                                                                                                                                                                                                        |
| Lachesis_group0__13_contigs__l.g1968 | 5604.234 | 592.9833 | 3.240111 | 8.40E-08 | 1.16E-05 | 1593 | - && G3Y416.1 RecName: Full=Cytochrome P450 monooxygenase yanC; AltName: Full=Yanuthone D synthesis protein C; Flags: Precursor && PF00067:Cytochrome P450                                                                                                                                          |
| Lachesis_group0__13_contigs__l.g6385 | 132.9916 | 14.31714 | 3.217261 | 1.22E-05 | 0.000393 | 1836 | - && - && PF09507:DNA polymerase subunit Cdc27                                                                                                                                                                                                                                                      |
| Lachesis_group0__13_contigs__l.g8222 | 2100.67  | 226.0516 | 3.21489  | 7.38E-14 | 1.16E-10 | 2214 | - && Q8TB72.2 RecName: Full=Pumilio homolog 2; Short=Pumilio-2 && -                                                                                                                                                                                                                                 |
| Lachesis_group0__13_contigs__l.g2419 | 263.2053 | 29.43699 | 3.152931 | 1.88E-07 | 2.00E-05 | 1119 | - && P0CS31.1 RecName: Full=Probable cytosolic iron-sulfur protein assembly protein 1 >P0CS30.1 RecName: Full=Probable cytosolic iron-sulfur protein assembly protein 1 && PF00400:WD domain, G-beta repeat                                                                                         |
| Lachesis_group0__13_contigs__l.g8360 | 101.9323 | 11.48358 | 3.134795 | 1.47E-06 | 8.49E-05 | 699  | - && Q6NUE2.1 RecName: Full=Carbonyl reductase family member 4; AltName: Full=3-ketoacyl-[acyl-carrier-protein] reductase beta subunit; Short=KAR beta subunit; AltName: Full=3-oxoacyl-[acyl-carrier-protein] reductase; AltName: Full=Quinone reductase CBR4 && PF00106:short chain dehydrogenase |
| Lachesis_group0__13_contigs__l.g1944 | 3101.123 | 353.9786 | 3.130156 | 3.44E-07 | 3.04E-05 | 1350 | - && Q55DV9.1 RecName: Full=Cystathionine gamma-lyase; AltName: Full=Gamma-cystathionase && PF01053:Cys/Met metabolism PLP-dependent enzyme                                                                                                                                                         |

|                                       |          |          |          |          |          |      |                                                                                                                                                                     |
|---------------------------------------|----------|----------|----------|----------|----------|------|---------------------------------------------------------------------------------------------------------------------------------------------------------------------|
| Lachesis_group0__13_contigs__l.g10956 | 249.8367 | 29.0847  | 3.104122 | 3.76E-08 | 6.78E-06 | 1035 | - && - && PF06775:Putative adipose-regulatory protein (Seipin)                                                                                                      |
| Lachesis_group0__13_contigs__l.g5341  | 132.83   | 15.56509 | 3.088315 | 6.70E-06 | 0.000258 | 903  | - && Q9P4T7.1 RecName: Full=Thymidylate synthase; Short=TS; Short=TSase && PF00303:Thymidylate synthase                                                             |
| Lachesis_group0__13_contigs__l.g9052  | 206.9132 | 24.16362 | 3.085894 | 9.69E-05 | 0.001772 | 1140 | - && - && PF13878:zinc-finger of acetyl-transferase ESCO PF13880:ESCO1/2 acetyl-transferase                                                                         |
| Lachesis_group0__13_contigs__l.g9890  | 445.469  | 52.69428 | 3.081877 | 2.60E-08 | 5.01E-06 | 1824 | - && Q9C0V0.1 RecName: Full=Probable amino-acid permease PB1C11.02 && PF00324:Amino acid permease                                                                   |
| Lachesis_group0__13_contigs__l.g6805  | 132.6019 | 15.66172 | 3.077456 | 2.40E-06 | 0.000121 | 906  | - && - && PF08167:rRNA processing/ribosome biogenesis                                                                                                               |
| Lachesis_group0__13_contigs__l.g5558  | 1132.719 | 138.7008 | 3.030905 | 2.16E-09 | 6.08E-07 | 2619 | - && Q9C1X1.1 RecName: Full=Periodic tryptophan protein 2 homolog && PF00400:WD domain, G-beta repeat PF04003:Dip2/Utp12 Family                                     |
| Lachesis_group0__13_contigs__l.g3665  | 93.1149  | 11.56388 | 3.024615 | 2.69E-05 | 0.000688 | 978  | - && Q99145.1 RecName: Full=ATP phosphoribosyltransferase; Short=ATP-PRT; Short=ATP-PRTase && PF08029:HisG, C-terminal domain PF01634:ATP phosphoribosyltransferase |
| Lachesis_group0__13_contigs__l.g7754  | 54.49373 | 6.653595 | 3.003825 | 0.000394 | 0.004729 | 3285 | - && P0CQ67.1 RecName: Full=DNA repair protein RAD5 && PF00271:Helicase conserved C-terminal domain PF00176:SNF2 family N-terminal domain PF08797:HIRAN domain      |
| Lachesis_group0__13_contigs__l.g6363  | 75.22285 | 9.40911  | 2.993515 | 1.59E-05 | 0.000484 | 3243 | - && O14343.1 RecName: Full=Kinesin-like protein 5 && PF00225:Kinesin motor domain                                                                                  |
| Lachesis_group0__13_contigs__l.g6668  | 110.9872 | 14.17146 | 2.977285 | 8.31E-06 | 0.0003   | 1770 | - && - && PF12937:F-box-like                                                                                                                                        |

|                                      |          |          |          |          |          |      |                                                                                                                                                                                                                             |
|--------------------------------------|----------|----------|----------|----------|----------|------|-----------------------------------------------------------------------------------------------------------------------------------------------------------------------------------------------------------------------------|
| Lachesis_group0__13_contigs__l.g5609 | 452.3297 | 57.37736 | 2.973489 | 4.12E-06 | 0.000184 | 2427 | - && A6QPL4.2 RecName: Full=Kinesin-like protein KIF22 && PF00225:Kinesin motor domain                                                                                                                                      |
| Lachesis_group0__13_contigs__l.g3366 | 510.9987 | 65.49202 | 2.968314 | 1.33E-07 | 1.57E-05 | 963  | - && Q6BDR8.1 RecName: Full=Non-structural maintenance of chromosome element 4; Short=Non-SMC element 4; AltName: Full=DNA repair protein rad62 && PF08743:Nse4 C-terminal PF15412:Binding domain of Nse4/EID3 to Nse3-MAGE |
| Lachesis_group0__13_contigs__l.g7937 | 1857.48  | 239.1627 | 2.958372 | 2.22E-08 | 4.51E-06 | 1032 | - && A8N2Z9.1 RecName: Full=Elongation factor Ts, mitochondrial; Short=EF-Ts; Short=EF-TsMt; Flags: Precursor && PF00889:Elongation factor TS                                                                               |
| Lachesis_group0__13_contigs__l.g7696 | 489.312  | 63.64049 | 2.944399 | 4.69E-07 | 3.99E-05 | 1758 | - && Q0UG00.1 RecName: Full=ATP-dependent RNA helicase MSS116, mitochondrial; Flags: Precursor && PF00271:Helicase conserved C-terminal domain PF00270:DEAD/DEAH box helicase                                               |
| Lachesis_group0__13_contigs__l.g9084 | 146.8231 | 19.31304 | 2.920176 | 8.23E-06 | 0.000299 | 3285 | - && - && PF08457:Sfi1 spindle body protein                                                                                                                                                                                 |
| Lachesis_group0__13_contigs__l.g5348 | 409.5437 | 54.79667 | 2.906774 | 7.69E-06 | 0.000286 | 3462 | - && Q06680.2 RecName: Full=Condensin complex subunit 3; AltName: Full=CAPG homolog && PF13646:HEAT repeats PF12719:Nuclear condensing complex subunits, C-term domain                                                      |
| Lachesis_group0__13_contigs__l.g4696 | 12324.72 | 1647.556 | 2.903274 | 4.33E-08 | 7.53E-06 | 798  | - && O23522.2 RecName: Full=Phospholipase A1-Ibeta2, chloroplastic; Flags: Precursor && PF01764:Lipase (class 3)                                                                                                            |
| Lachesis_group0__13_contigs__l.g5221 | 189.096  | 25.36848 | 2.88958  | 2.16E-05 | 0.000592 | 3504 | - && O94751.1 RecName: Full=Checkpoint serine/threonine-protein kinase bub1 && PF00069:Protein kinase domain PF08311:Mad3/BUB1 homology region 1                                                                            |

|                                      |          |          |          |          |          |      |                                                                                                                                                                                                                                   |
|--------------------------------------|----------|----------|----------|----------|----------|------|-----------------------------------------------------------------------------------------------------------------------------------------------------------------------------------------------------------------------------------|
| Lachesis_group0__13_contigs__l.g9851 | 122.1368 | 16.62223 | 2.884063 | 4.77E-05 | 0.001035 | 1155 | - && Q14AI0.1 RecName: Full=Sister chromatid cohesion protein DCC1; AltName: Full=Defective in sister chromatid cohesion protein 1 homolog && PF09724:Uncharacterized conserved protein (DUF2036)                                 |
| Lachesis_group0__13_contigs__l.g3306 | 114.469  | 15.54949 | 2.882176 | 3.05E-06 | 0.000146 | 306  | - && Q4P8G2.1 RecName: Full=Diphthamide biosynthesis protein 3 && PF05207:CSL zinc finger                                                                                                                                         |
| Lachesis_group0__13_contigs__l.g1086 | 2169.552 | 296.7473 | 2.870944 | 3.32E-08 | 6.16E-06 | 2319 | - && Q80Z60.2 RecName: Full=Endothelin-converting enzyme 2; Short=ECE-2; Includes: RecName: Full=Methyltransferase-like region; Includes: RecName: Full=Endothelin-converting enzyme 2 region && PF08241:Methyltransferase domain |
| Lachesis_group0__13_contigs__l.g2237 | 690.3075 | 94.61281 | 2.86404  | 1.16E-07 | 1.45E-05 | 1740 | - && - && PF12937:F-box-like                                                                                                                                                                                                      |
| Lachesis_group0__13_contigs__l.g4067 | 922.7464 | 127.1798 | 2.860961 | 1.16E-07 | 1.45E-05 | 2370 | - && O13956.1 RecName: Full=Ribosome biogenesis protein tsr1 && PF04950:40S ribosome biogenesis protein Tsr1 and BMS1 C-terminal PF08142:AARP2CN (NUC121) domain                                                                  |
| Lachesis_group0__13_contigs__l.g2258 | 347.0618 | 47.60296 | 2.86032  | 6.41E-07 | 4.95E-05 | 3666 | - && P0CR92.1 RecName: Full=Topoisomerase 1-associated factor 1 && PF05029:Timeless protein C terminal region PF04821:Timeless protein                                                                                            |
| Lachesis_group0__13_contigs__l.g9771 | 22.49095 | 3.058015 | 2.857078 | 0.007801 | 0.039844 | 1323 | - && Q91727.1 RecName: Full=Cyclin-dependent kinase 4; AltName: Full=Cell division protein kinase 4 && PF00069:Protein kinase domain                                                                                              |
| Lachesis_group0__13_contigs__l.g9344 | 360.9619 | 50.31784 | 2.844853 | 5.42E-07 | 4.31E-05 | 1707 | - && - && PF09739:Mini-chromosome maintenance replisome factor                                                                                                                                                                    |
| Lachesis_group0__13_contigs__l.g5251 | 176.4204 | 24.6557  | 2.837668 | 0.000179 | 0.002674 | 1077 | - && Q8X082.1 RecName: Full=Replication factor C subunit 5; Short=Replication factor C5; AltName:                                                                                                                                 |

|                                      |          |          |          |          |          |      |                                                                                                                                                                                                 |
|--------------------------------------|----------|----------|----------|----------|----------|------|-------------------------------------------------------------------------------------------------------------------------------------------------------------------------------------------------|
|                                      |          |          |          |          |          |      | Full=Probable activator 1 subunit 5 && PF08542:Replication factor C C-terminal domain PF13177:DNA polymerase III, delta subunit                                                                 |
| Lachesis_group0__13_contigs__l.g951  | 143.3845 | 20.14182 | 2.837009 | 9.13E-07 | 6.18E-05 | 1287 | - && Q10498.1 RecName: Full=Protein HGH1 homolog && PF04063:Domain of unknown function (DUF383) PF04064:Domain of unknown function (DUF384)                                                     |
| Lachesis_group0__13_contigs__l.g4034 | 615.0993 | 86.34085 | 2.834361 | 6.87E-08 | 1.00E-05 | 1011 | - && Q10248.2 RecName: Full=Uncharacterized mitochondrial carrier C4G9.20c && PF00153:Mitochondrial carrier protein                                                                             |
| Lachesis_group0__13_contigs__l.g9173 | 222.3818 | 31.13482 | 2.832851 | 2.31E-06 | 0.000118 | 1332 | - && Q6C656.1 RecName: Full=Chromosome segregation in meiosis protein 3 && PF07962:Replication Fork Protection Component Swi3                                                                   |
| Lachesis_group0__13_contigs__l.g7345 | 129.3869 | 18.20666 | 2.816263 | 0.000302 | 0.003879 | 336  | - && - && PF07019:Rab5-interacting protein (Rab5ip)                                                                                                                                             |
| Lachesis_group0__13_contigs__l.g2754 | 82.84506 | 11.68965 | 2.808974 | 0.000143 | 0.002318 | 1233 | - && - && PF13414:TPR repeat                                                                                                                                                                    |
| Lachesis_group0__13_contigs__l.g6835 | 2536.905 | 362.2934 | 2.808595 | 1.25E-07 | 1.50E-05 | 1665 | - && P28745.2 RecName: Full=Protein pim1; AltName: Full=Poly(A)+ RNA transport protein 2 && PF00415:Regulator of chromosome condensation (RCC1) repeat                                          |
| Lachesis_group0__13_contigs__l.g8691 | 429.9706 | 61.66128 | 2.799023 | 7.65E-07 | 5.57E-05 | 1098 | - && Q54S38.2 RecName: Full=Probable RNA 3'-terminal phosphate cyclase-like protein && PF01137:RNA 3'-terminal phosphate cyclase PF05189:RNA 3'-terminal phosphate cyclase (RTC), insert domain |

|                                       |          |          |          |          |          |      |                                                                                                                                                                                                                                                                                                                            |
|---------------------------------------|----------|----------|----------|----------|----------|------|----------------------------------------------------------------------------------------------------------------------------------------------------------------------------------------------------------------------------------------------------------------------------------------------------------------------------|
| Lachesis_group0__13_contigs__l.g3389  | 1384.37  | 199.2006 | 2.7955   | 4.74E-08 | 7.86E-06 | 1875 | - && O94528.1 RecName: Full=Caffeine resistance protein 5 && PF07690:Major Facilitator Superfamily                                                                                                                                                                                                                         |
| Lachesis_group0__13_contigs__l.g6499  | 9048.043 | 1309.316 | 2.788974 | 0.000121 | 0.002062 | 1197 | - && Q55E72.1 RecName: Full=Probable polyketide synthase 1; Short=dipks1; Includes: RecName: Full=Polyketide synthase stlA; Includes: RecName: Full=Chalcone synthase stlA; AltName: Full=Steely1 && PF02797:Chalcone and stilbene synthases, C-terminal domain PF00195:Chalcone and stilbene synthases, N-terminal domain |
| Lachesis_group0__13_contigs__l.g10646 | 94.97398 | 13.74593 | 2.786002 | 5.57E-05 | 0.001164 | 750  | - && B6JGU7.1 RecName: Full=ATP-dependent Clp protease proteolytic subunit; AltName: Full=Endopeptidase Clp && PF00574:Clp protease                                                                                                                                                                                        |
| Lachesis_group0__13_contigs__l.g8807  | 195.7033 | 28.36371 | 2.782586 | 5.38E-06 | 0.000223 | 2754 | - && - && PF12253:Chromatin assembly factor 1 subunit A                                                                                                                                                                                                                                                                    |
| Lachesis_group0__13_contigs__l.g7346  | 1842.914 | 275.1056 | 2.744166 | 6.51E-08 | 9.64E-06 | 1116 | - && P78780.2 RecName: Full=Probable aspartate-semialdehyde dehydrogenase; Short=ASA dehydrogenase; Short=ASADH; AltName: Full=Aspartate-beta-semialdehyde dehydrogenase && PF01118:Semialdehyde dehydrogenase, NAD binding domain PF02774:Semialdehyde dehydrogenase, dimerisation domain                                 |
| Lachesis_group0__13_contigs__l.g7501  | 60.14427 | 8.945481 | 2.728351 | 0.001297 | 0.011073 | 294  | - && - && PF05730:CFEM domain                                                                                                                                                                                                                                                                                              |
| Lachesis_group0__13_contigs__l.g11359 | 795.5687 | 120.4317 | 2.724598 | 1.18E-07 | 1.45E-05 | 2445 | - && Q9P7D4.3 RecName: Full=Homocitrate dehydratase, mitochondrial; AltName: Full=Aconitase 2; Flags: Precursor && PF00694:Aconitase C-terminal                                                                                                                                                                            |

|                                       |          |          |          |          |          |      |                                                                                                                                                                                                                  |
|---------------------------------------|----------|----------|----------|----------|----------|------|------------------------------------------------------------------------------------------------------------------------------------------------------------------------------------------------------------------|
|                                       |          |          |          |          |          |      | domain PF00330:Aconitase family (aconitate hydratase)                                                                                                                                                            |
| Lachesis_group0__13_contigs__l.g4951  | 176.8857 | 26.72646 | 2.721072 | 1.24E-05 | 0.000397 | 690  | - && - && PF09725:Folate-sensitive fragile site protein Fra10Ac1                                                                                                                                                 |
| Lachesis_group0__13_contigs__l.g10555 | 131.7805 | 19.93815 | 2.720859 | 9.07E-06 | 0.000322 | 3834 | - && Q96GN5.2 RecName: Full=Cell division cycle-associated 7-like protein; AltName: Full=Protein JPO2; AltName: Full=Transcription factor RAM2 && PF10497:Zinc-finger domain of monoamine-oxidase A repressor R1 |
| Lachesis_group0__13_contigs__l.g6547  | 95.78278 | 14.62654 | 2.718073 | 6.45E-05 | 0.001306 | 1080 | - && - && PF00011:Hsp20/alpha crystallin family                                                                                                                                                                  |
| Lachesis_group0__13_contigs__l.g4546  | 2001.609 | 306.198  | 2.709012 | 9.58E-09 | 2.23E-06 | 1956 | - && Q9UT32.1 RecName: Full=Putative ribosome biogenesis protein C8F11.04; AltName: Full=U3 snoRNP-associated protein C8F11.04 && PF00687:Ribosomal protein L1p/L10e family                                      |
| Lachesis_group0__13_contigs__l.g9214  | 2411.74  | 369.2458 | 2.707418 | 8.56E-07 | 5.90E-05 | 1455 | - && P38680.2 RecName: Full=N amino acid transport system protein; AltName: Full=Methyltryptophan resistance protein && PF01490:Transmembrane amino acid transporter protein                                     |
| Lachesis_group0__13_contigs__l.g9227  | 1137.408 | 174.303  | 2.706898 | 1.16E-07 | 1.45E-05 | 1623 | - && P87041.3 RecName: Full=UDP-galactose transporter; AltName: Full=Golgi UDP-Gal transporter && PF04142:Nucleotide-sugar transporter                                                                           |
| Lachesis_group0__13_contigs__l.g10832 | 1512.405 | 235.4435 | 2.683336 | 1.95E-08 | 4.12E-06 | 1794 | - && P78750.3 RecName: Full=Probable U3 small nucleolar RNA-associated protein 18; Short=U3 snoRNA-associated protein 18 && -                                                                                    |
| Lachesis_group0__13_contigs__l.g3907  | 381.2808 | 59.50524 | 2.678041 | 2.34E-07 | 2.27E-05 | 1695 | - && - && PF12937:F-box-like                                                                                                                                                                                     |

|                                       |          |          |          |          |          |      |                                                                                                                                                                                                                                   |
|---------------------------------------|----------|----------|----------|----------|----------|------|-----------------------------------------------------------------------------------------------------------------------------------------------------------------------------------------------------------------------------------|
| Lachesis_group0__13_contigs__l.g344   | 1550.619 | 243.5228 | 2.670875 | 2.88E-06 | 0.00014  | 1665 | - && P53388.1 RecName: Full=Dicarboxylic amino acid permease && PF00324:Amino acid permease                                                                                                                                       |
| Lachesis_group0__13_contigs__l.g9619  | 75.65426 | 12.0721  | 2.670699 | 0.001182 | 0.01035  | 876  | - && - && PF12328:Rpp20 subunit of nuclear RNase MRP and P                                                                                                                                                                        |
| Lachesis_group0__13_contigs__l.g11157 | 364.2258 | 57.5447  | 2.664493 | 6.15E-08 | 9.49E-06 | 1179 | - && Q8Z8W3.1 RecName: Full=2-dehydropantoate 2-reductase; AltName: Full=Ketopantoate reductase; Short=KPA reductase; Short=KPR && PF02558:Ketopantoate reductase PanE/ApbA   PF08546:Ketopantoate reductase PanE/ApbA C terminal |
| Lachesis_group0__13_contigs__l.g4688  | 840.6323 | 132.71   | 2.664394 | 8.14E-07 | 5.69E-05 | 822  | - && Q96DG6.1 RecName: Full=Carboxymethylenebutenolidase homolog && PF01738:Dienelactone hydrolase family                                                                                                                         |
| Lachesis_group0__13_contigs__l.g148   | 386.8719 | 61.25437 | 2.659553 | 8.87E-07 | 6.07E-05 | 1245 | - && P49321.2 RecName: Full=Nuclear autoantigenic sperm protein; Short=NASP && PF10516:SHNi-TPR                                                                                                                                   |
| Lachesis_group0__13_contigs__l.g10392 | 458.3329 | 72.51041 | 2.656731 | 0.000164 | 0.002534 | 3291 | - && Q04336.1 RecName: Full=Uncharacterized protein YMR196W && PF03200:Glycosyl hydrolase family 63 C-terminal domain                                                                                                             |
| Lachesis_group0__13_contigs__l.g9486  | 331.0712 | 52.64166 | 2.651585 | 3.57E-06 | 0.000163 | 1944 | - && O94481.2 RecName: Full=Transcription factor TFIIIB component B"; AltName: Full=Transcription factor TFIIIB complex subunit bdp1 && PF15963:Myb DNA-binding like                                                              |
| Lachesis_group0__13_contigs__l.g4398  | 432.3211 | 69.21015 | 2.640352 | 1.73E-06 | 9.57E-05 | 1752 | - && D7PHY8.1 RecName: Full=Efflux pump vrtL; AltName: Full=Viridicatumtoxin synthesis protein L && PF07690:Major Facilitator Superfamily                                                                                         |
| Lachesis_group0__13_contigs__l.g6392  | 741.8378 | 119.0702 | 2.637274 | 0.000274 | 0.003654 | 1167 | - && O13991.3 RecName: Full=Uncharacterized oxidoreductase C26H5.09c &&                                                                                                                                                           |



|                                      |          |          |          |          |          |      |                                                                                                                                                                                                                                                                                                                           |
|--------------------------------------|----------|----------|----------|----------|----------|------|---------------------------------------------------------------------------------------------------------------------------------------------------------------------------------------------------------------------------------------------------------------------------------------------------------------------------|
|                                      |          |          |          |          |          |      | PF01408:Oxidoreductase family, NAD-binding Rossmann fold                                                                                                                                                                                                                                                                  |
| Lachesis_group0__13_contigs__l.g8861 | 1189.567 | 192.1538 | 2.629223 | 1.36E-06 | 8.11E-05 | 1833 | - && Q92372.1 RecName: Full=Replication factor A protein 1; AltName: Full=Single-stranded DNA-binding protein p68 subunit && PF01336:OB-fold nucleic acid binding domain PF04057:Replication factor-A protein 1, N-terminal domain PF08646:Replication factor-A C terminal domain PF16900:Replication protein A OB domain |
| Lachesis_group0__13_contigs__l.g2514 | 1283.549 | 207.6275 | 2.628834 | 2.44E-07 | 2.33E-05 | 1356 | - && B0DWM8.1 RecName: Full=Ribosome biogenesis protein YTM1 && PF08154:NLE (NUC135) domain                                                                                                                                                                                                                               |
| Lachesis_group0__13_contigs__l.g6441 | 131.9298 | 21.36111 | 2.616033 | 0.002503 | 0.017661 | 1149 | - && Q9C167.2 RecName: Full=Ribonucleoside-diphosphate reductase small chain; AltName: Full=Ribonucleotide reductase small subunit && PF00268:Ribonucleotide reductase, small chain                                                                                                                                       |
| Lachesis_group0__13_contigs__l.g6847 | 1945.191 | 317.1988 | 2.615569 | 0.00016  | 0.002502 | 771  | - && Q12335.1 RecName: Full=Protoplast secreted protein 2; Flags: Precursor && PF03358:NADPH-dependent FMN reductase                                                                                                                                                                                                      |
| Lachesis_group0__13_contigs__l.g6885 | 947.7798 | 155.7639 | 2.604541 | 1.98E-06 | 0.000105 | 1770 | - && P40186.3 RecName: Full=PHO85 cyclin-7; AltName: Full=PHO85-associated protein 1 && PF08613:Cyclin                                                                                                                                                                                                                    |
| Lachesis_group0__13_contigs__l.g8694 | 148.3837 | 24.58402 | 2.603171 | 0.000149 | 0.002381 | 1278 | - && O08760.2 RecName: Full=N-glycosylase/DNA lyase; Includes: RecName: Full=8-oxoguanine DNA glycosylase; Includes: RecName: Full=DNA-(apurinic or apyrimidinic site) lyase; Short=AP lyase && PF07934:8-oxoguanine DNA glycosylase,                                                                                     |

|                                       |          |          |          |          |          |      |                                                                                                                                                                                                                                                                        |
|---------------------------------------|----------|----------|----------|----------|----------|------|------------------------------------------------------------------------------------------------------------------------------------------------------------------------------------------------------------------------------------------------------------------------|
|                                       |          |          |          |          |          |      | N-terminal domain PF00730:HhH-GPD superfamily base excision DNA repair protein                                                                                                                                                                                         |
| Lachesis_group0__13_contigs__l.g3189  | 233.6559 | 38.88536 | 2.592989 | 6.52E-06 | 0.000253 | 1437 | - && B5FXE5.1 RecName: Full=Apoptosis-inducing factor 2 && PF07992:Pyridine nucleotide-disulphide oxidoreductase                                                                                                                                                       |
| Lachesis_group0__13_contigs__l.g10487 | 27.77236 | 4.529881 | 2.592101 | 0.008636 | 0.042825 | 561  | - && - && PF01753:MYND finger                                                                                                                                                                                                                                          |
| Lachesis_group0__13_contigs__l.g11644 | 183.3396 | 30.60117 | 2.584014 | 3.33E-05 | 0.000793 | 1089 | - && O94449.1 RecName: Full=Replication factor C subunit 4; Short=Replication factor C4 && PF00004:ATPase family associated with various cellular activities (AAA) PF08542:Replication factor C C-terminal domain                                                      |
| Lachesis_group0__13_contigs__l.g6500  | 424.6058 | 71.0361  | 2.582547 | 2.92E-05 | 0.000728 | 1239 | - && P48407.1 RecName: Full=Pinosylvin synthase 1; AltName: Full=Dihydropinosylvin synthase 1; AltName: Full=Stilbene synthase 1; Short=STS 1 && PF00195:Chalcone and stilbene synthases, N-terminal domain PF02797:Chalcone and stilbene synthases, C-terminal domain |
| Lachesis_group0__13_contigs__l.g4738  | 37.287   | 6.192217 | 2.579608 | 0.006846 | 0.036162 | 3234 | - && B4J3F1.1 RecName: Full=Serine/threonine-protein kinase PLK4; AltName: Full=Polo-like kinase 4; Short=PLK-4; AltName: Full=Serine/threonine-protein kinase SAK && PF00069:Protein kinase domain                                                                    |
| Lachesis_group0__13_contigs__l.g1957  | 1298.38  | 217.184  | 2.579183 | 2.19E-07 | 2.16E-05 | 1656 | - && Q9USK3.1 RecName: Full=Uncharacterized transporter C4B3.13 && PF01554:MatE                                                                                                                                                                                        |
| Lachesis_group0__13_contigs__l.g6908  | 716.1454 | 120.2783 | 2.573301 | 3.30E-07 | 2.94E-05 | 1035 | - && - && PF02777:Iron/manganese superoxide dismutases, C-terminal domain                                                                                                                                                                                              |
| Lachesis_group0__13_contigs__l.g7753  | 1466.049 | 247.0228 | 2.570429 | 5.78E-06 | 0.000234 | 1677 | - && P87153.1 RecName: Full=Probable T-complex protein 1 subunit eta; Short=TCP-1-eta; AltName:                                                                                                                                                                        |

|                                       |          |          |          |          |          |      |                                                                                                                                                                                                  |
|---------------------------------------|----------|----------|----------|----------|----------|------|--------------------------------------------------------------------------------------------------------------------------------------------------------------------------------------------------|
|                                       |          |          |          |          |          |      | Full=CCT-eta && PF00118:TCP-1/cpn60 chaperonin family                                                                                                                                            |
| Lachesis_group0__13_contigs__l.g10719 | 20.98632 | 3.514944 | 2.569135 | 0.009556 | 0.04566  | 903  | - && - && PF00069:Protein kinase domain                                                                                                                                                          |
| Lachesis_group0__13_contigs__l.g10133 | 490.8132 | 82.77515 | 2.56814  | 8.07E-07 | 5.69E-05 | 960  | - && Q09704.1 RecName: Full=Exosome complex component rrp4; AltName: Full=Ribosomal RNA-processing protein 4 && PF14382:Exosome complex exonuclease RRP4 N-terminal region PF15985:KH domain     |
| Lachesis_group0__13_contigs__l.g10511 | 4920.251 | 831.8664 | 2.564613 | 7.77E-07 | 5.57E-05 | 1890 | - && P87142.3 RecName: Full=Heat shock protein 70 homolog C57A7.12 && PF00012:Hsp70 protein PF10712:NAD-specific glutamate dehydrogenase                                                         |
| Lachesis_group0__13_contigs__l.g10180 | 158.2567 | 26.68558 | 2.564365 | 0.000217 | 0.003104 | 1005 | - && - && PF09468:Ydr279p protein family (RNase H2 complex component)                                                                                                                            |
| Lachesis_group0__13_contigs__l.g4468  | 1009.385 | 170.8594 | 2.56342  | 5.39E-07 | 4.31E-05 | 1083 | - && O13648.3 RecName: Full=Ribosomal protein arginine N-methyltransferase rmt3 && PF06325:Ribosomal protein L11 methyltransferase (PrmA)                                                        |
| Lachesis_group0__13_contigs__l.g9031  | 1342.986 | 227.5912 | 2.561946 | 1.55E-06 | 8.89E-05 | 1389 | - && P50514.1 RecName: Full=Probable argininosuccinate lyase; Short=ASAL; AltName: Full=Arginosuccinase && PF00206:Lyase PF14698:Argininosuccinate lyase C-terminal                              |
| Lachesis_group0__13_contigs__l.g5796  | 3262.543 | 553.9272 | 2.558689 | 1.69E-06 | 9.49E-05 | 1803 | - && Q05506.1 RecName: Full=Arginine--tRNA ligase, cytoplasmic; AltName: Full=Arginyl-tRNA synthetase; Short=ArgRS && PF00750:tRNA synthetases class I (R) PF05746:DALR anticodon binding domain |

|                                      |          |          |          |          |          |      |                                                                                                                                                                                                                           |
|--------------------------------------|----------|----------|----------|----------|----------|------|---------------------------------------------------------------------------------------------------------------------------------------------------------------------------------------------------------------------------|
| Lachesis_group0__13_contigs__l.g3446 | 41.01635 | 6.909103 | 2.556389 | 0.004901 | 0.028534 | 636  | - && - && PF12937:F-box-like                                                                                                                                                                                              |
| Lachesis_group0__13_contigs__l.g3417 | 203.3038 | 34.86034 | 2.547843 | 1.88E-05 | 0.000544 | 630  | - && - && PF08641:Kinetochore protein Mis14 like                                                                                                                                                                          |
| Lachesis_group0__13_contigs__l.g2428 | 6365.295 | 1098.262 | 2.535209 | 3.91E-07 | 3.37E-05 | 1437 | - && O23254.1 RecName: Full=Serine hydroxymethyltransferase 4; Short=AtSHMT4; AltName: Full=Glycine hydroxymethyltransferase 4; AltName: Full=Serine methylase 4 && PF00464:Serine hydroxymethyltransferase               |
| Lachesis_group0__13_contigs__l.g2226 | 1383.165 | 239.9825 | 2.528469 | 4.92E-07 | 4.05E-05 | 1158 | - && Q01752.1 RecName: Full=Aryl-alcohol dehydrogenase [NADP(+)]; Short=AAD && PF00248:Aldo/keto reductase family                                                                                                         |
| Lachesis_group0__13_contigs__l.g8804 | 1477.205 | 256.2661 | 2.527914 | 3.18E-06 | 0.00015  | 1506 | - && O94582.1 RecName: Full=Probable anthranilate synthase component 1; AltName: Full=Anthranilate synthase component I && PF04715:Anthranilate synthase component I, N terminal region PF00425:chorismate binding enzyme |
| Lachesis_group0__13_contigs__l.g5734 | 6489.737 | 1126.98  | 2.525743 | 2.54E-08 | 5.01E-06 | 1470 | - && Q9UQW9.1 RecName: Full=Ornithine decarboxylase; Short=ODC && PF02784:Pyridoxal-dependent decarboxylase, pyridoxal binding domain PF00278:Pyridoxal-dependent decarboxylase, C-terminal sheet domain                  |
| Lachesis_group0__13_contigs__l.g4764 | 1557.059 | 272.3287 | 2.516256 | 9.21E-07 | 6.19E-05 | 2367 | - && O74879.1 RecName: Full=Ribosome biogenesis protein enp2 homolog && PF08159:NUC153 domain                                                                                                                             |
| Lachesis_group0__13_contigs__l.g2706 | 119.6346 | 20.7741  | 2.513731 | 0.004318 | 0.026026 | 645  | - && - && PF16015:Promethin                                                                                                                                                                                               |
| Lachesis_group0__13_contigs__l.g7204 | 1356.619 | 238.1187 | 2.511062 | 8.21E-07 | 5.69E-05 | 1422 | - && Q9UTK0.1 RecName: Full=20S-pre-rRNA D-site endonuclease nob1; AltName: Full=Pre-rRNA-                                                                                                                                |

|                                       |          |          |          |          |          |      |                                                                                                                                                                                                                                                                     |
|---------------------------------------|----------|----------|----------|----------|----------|------|---------------------------------------------------------------------------------------------------------------------------------------------------------------------------------------------------------------------------------------------------------------------|
|                                       |          |          |          |          |          |      | processing endonuclease nob1 && PF08772:Nin<br>one binding (NOB1) Zn-ribbon like                                                                                                                                                                                    |
| Lachesis_group0__13_contigs__l.g11397 | 586.3343 | 103.9905 | 2.497319 | 3.30E-06 | 0.000153 | 300  | - && P0CR99.1 RecName: Full=Mitochondrial<br>import inner membrane translocase subunit<br>TIM10 >P0CR98.1 RecName: Full=Mitochondrial<br>import inner membrane translocase subunit TIM10<br>&& PF02953:Tim10/DDP family zinc finger                                 |
| Lachesis_group0__13_contigs__l.g3687  | 296.8936 | 52.77477 | 2.497172 | 1.83E-05 | 0.000536 | 372  | - && Q09723.1 RecName: Full=Multifunctional<br>methyltransferase subunit trm112; AltName:<br>Full=eRF1 methyltransferase subunit trm112;<br>Short=eRF1 MTase subunit trm112; AltName:<br>Full=tRNA methyltransferase 112 homolog &&<br>PF03966:Trm112p-like protein |
| Lachesis_group0__13_contigs__l.g113   | 71.18328 | 12.63715 | 2.492582 | 9.71E-05 | 0.001772 | 1209 | - && - && PF10294:Lysine methyltransferase                                                                                                                                                                                                                          |
| Lachesis_group0__13_contigs__l.g1025  | 884.6977 | 157.6804 | 2.489437 | 6.14E-06 | 0.000243 | 6777 | - && Q7S1P9.3 RecName: Full=DNA repair protein<br>rad5; AltName: Full=Mutagen-sensitive protein 41<br>&& PF00271:Helicase conserved C-terminal<br>domain PF00145:C-5 cytosine-specific DNA<br>methylase PF00176:SNF2 family N-terminal<br>domain                    |
| Lachesis_group0__13_contigs__l.g2350  | 302.4759 | 54.00467 | 2.488308 | 5.84E-06 | 0.000235 | 1329 | - && P53011.1 RecName: Full=Nucleoporin SEH1;<br>AltName: Full=Nuclear pore protein SEH1;<br>AltName: Full=SEC13 homolog 1 && -                                                                                                                                     |
| Lachesis_group0__13_contigs__l.g3747  | 92.25084 | 16.43249 | 2.485046 | 0.00049  | 0.005531 | 450  | - && Q8HYI9.1 RecName: Full=Prefoldin subunit 5<br>&& PF02996:Prefoldin subunit                                                                                                                                                                                     |
| Lachesis_group0__13_contigs__l.g10984 | 1625.207 | 291.1908 | 2.481601 | 1.82E-06 | 9.87E-05 | 972  | - && O74919.1 RecName: Full=RNA-binding<br>protein rnc1; AltName: Full=RNA-binding protein                                                                                                                                                                          |

|                                       |          |          |          |          |          |      |                                                                                                                                                                                                                                                                                                     |
|---------------------------------------|----------|----------|----------|----------|----------|------|-----------------------------------------------------------------------------------------------------------------------------------------------------------------------------------------------------------------------------------------------------------------------------------------------------|
|                                       |          |          |          |          |          |      | that suppresses calcineurin deletion 1 && PF00013:KH domain                                                                                                                                                                                                                                         |
| Lachesis_group0__13_contigs__l.g7977  | 598.7635 | 107.4099 | 2.480898 | 1.89E-06 | 0.000102 | 1389 | - && O74731.1 RecName: Full=tRNA-dihydrouridine(20) synthase [NAD(P)+]; AltName: Full=tRNA-dihydrouridine synthase 2 && PF01207:Dihydrouridine synthase (Dus)                                                                                                                                       |
| Lachesis_group0__13_contigs__l.g466   | 611.8194 | 110.3067 | 2.473566 | 9.26E-06 | 0.000324 | 1467 | - && Q4PHV3.1 RecName: Full=Pre-rRNA-processing protein IPI3 && -                                                                                                                                                                                                                                   |
| Lachesis_group0__13_contigs__l.g1201  | 105.2085 | 18.9678  | 2.471741 | 0.000331 | 0.00415  | 1233 | - && Q9UTK3.1 RecName: Full=Probable nicotinate phosphoribosyltransferase; Short=NAPRTase && PF04095:Nicotinate phosphoribosyltransferase (NAPRTase) family                                                                                                                                         |
| Lachesis_group0__13_contigs__l.g11522 | 52.93536 | 9.433803 | 2.464389 | 0.008321 | 0.041733 | 2631 | - && Q96Q89.3 RecName: Full=Kinesin-like protein KIF20B; AltName: Full=Cancer/testis antigen 90; Short=CT90; AltName: Full=Kinesin family member 20B; AltName: Full=Kinesin-related motor interacting with PIN1; AltName: Full=M-phase phosphoprotein 1; Short=MPP1 && PF00225:Kinesin motor domain |
| Lachesis_group0__13_contigs__l.g11437 | 526.1124 | 95.64892 | 2.462523 | 2.96E-05 | 0.000731 | 2559 | - && Q9W032.1 RecName: Full=Protein ecdysoneless && PF07093:SGT1 protein                                                                                                                                                                                                                            |
| Lachesis_group0__13_contigs__l.g248   | 1279.921 | 235.1769 | 2.444593 | 2.43E-07 | 2.33E-05 | 2244 | - && - && PF12767:Transcriptional regulator of RNA polII, SAGA, subunit I PF05132:RNA polymerase III RPC4                                                                                                                                                                                           |
| Lachesis_group0__13_contigs__l.g5955  | 85.90041 | 15.67732 | 2.442131 | 0.000153 | 0.002426 | 1554 | - && P49374.1 RecName: Full=High-affinity glucose transporter && PF00083:Sugar (and other) transporter                                                                                                                                                                                              |

|                                       |          |          |          |          |          |      |                                                                                                                                                                                                                                                                                                                                                                                                                                                                                     |
|---------------------------------------|----------|----------|----------|----------|----------|------|-------------------------------------------------------------------------------------------------------------------------------------------------------------------------------------------------------------------------------------------------------------------------------------------------------------------------------------------------------------------------------------------------------------------------------------------------------------------------------------|
| Lachesis_group0__13_contigs__l.g9457  | 1614.481 | 297.2786 | 2.442045 | 5.10E-06 | 0.000215 | 3606 | - && - && PF03177:Non-repetitive/WGA-negative nucleoporin C-terminal PF08801:Nup133 N terminal like                                                                                                                                                                                                                                                                                                                                                                                 |
| Lachesis_group0__13_contigs__l.g5672  | 710.0869 | 131.4299 | 2.433514 | 2.87E-06 | 0.00014  | 801  | - && P0CS81.1 RecName: Full=tRNA (guanine-N(7)-)-methyltransferase; AltName: Full=Transfer RNA methyltransferase 8; AltName: Full=tRNA (guanine(46)-N(7))-methyltransferase; AltName: Full=tRNA(m7G46)-methyltransferase >P0CS80.1 RecName: Full=tRNA (guanine-N(7)-)-methyltransferase; AltName: Full=Transfer RNA methyltransferase 8; AltName: Full=tRNA (guanine(46)-N(7))-methyltransferase; AltName: Full=tRNA(m7G46)-methyltransferase && PF02390:Putative methyltransferase |
| Lachesis_group0__13_contigs__l.g10934 | 625.1385 | 116.1922 | 2.428281 | 1.60E-07 | 1.80E-05 | 3729 | - && Q04217.1 RecName: Full=Probable ATP-dependent RNA helicase DHR1; AltName: Full=DEAH box RNA helicase DHR1; AltName: Full=Extracellular mutant protein 16 && PF07717:Oligonucleotide/oligosaccharide-binding (OB)-fold PF00270:DEAD/DEAH box helicase PF00271:Helicase conserved C-terminal domain PF04408:Helicase associated domain (HA2)                                                                                                                                     |
| Lachesis_group0__13_contigs__l.g3864  | 261.8435 | 48.6934  | 2.42824  | 4.17E-06 | 0.000186 | 1710 | - && - && PF12937:F-box-like                                                                                                                                                                                                                                                                                                                                                                                                                                                        |
| Lachesis_group0__13_contigs__l.g9037  | 328.2249 | 61.08449 | 2.423093 | 1.95E-05 | 0.000552 | 1494 | - && P0CS57.1 RecName: Full=DNA damage-binding protein CMR1 >P0CS56.1 RecName: Full=DNA damage-binding protein CMR1 && -                                                                                                                                                                                                                                                                                                                                                            |

|                                       |          |          |          |          |          |      |                                                                                                                                                                                                                                                                                                                                                                                                                                            |
|---------------------------------------|----------|----------|----------|----------|----------|------|--------------------------------------------------------------------------------------------------------------------------------------------------------------------------------------------------------------------------------------------------------------------------------------------------------------------------------------------------------------------------------------------------------------------------------------------|
| Lachesis_group0__13_contigs__l.g339   | 106.5062 | 19.8822  | 2.411533 | 0.000117 | 0.002006 | 1032 | - && Q96RS0.3 RecName: Full=Trimethylguanosine synthase; AltName: Full=CLL-associated antigen KW-2; AltName: Full=Cap-specific guanine-N2 methyltransferase; AltName: Full=Hepatocellular carcinoma-associated antigen 137; AltName: Full=Nuclear receptor coactivator 6-interacting protein; AltName: Full=PRIP-interacting protein with methyltransferase motif; Short=PIMT; Short=PIPMT && PF09445:RNA cap guanine-N2 methyltransferase |
| Lachesis_group0__13_contigs__l.g4250  | 661.2622 | 124.4959 | 2.409053 | 1.31E-05 | 0.000411 | 1431 | - && O94636.2 RecName: Full=tRNA (guanine(10)-N2)-methyltransferase; AltName: Full=tRNA guanosine-2'-O-methyltransferase TRM11; Short=tRNA methylase 11 && PF13659:Methyltransferase domain                                                                                                                                                                                                                                                |
| Lachesis_group0__13_contigs__l.g135   | 158.2412 | 30.08145 | 2.40121  | 2.80E-05 | 0.000707 | 1794 | - && - && PF00270:DEAD/DEAH box helicase                                                                                                                                                                                                                                                                                                                                                                                                   |
| Lachesis_group0__13_contigs__l.g10160 | 114.7667 | 21.76865 | 2.39781  | 0.000175 | 0.002639 | 390  | - && B8PBQ6.1 RecName: Full=Transcription activator of gluconeogenesis ERT1 && -                                                                                                                                                                                                                                                                                                                                                           |
| Lachesis_group0__13_contigs__l.g7510  | 1473.434 | 280.1696 | 2.395218 | 3.62E-06 | 0.000164 | 1689 | - && O94365.1 RecName: Full=U3 small nucleolar RNA-associated protein 15; Short=U3 snoRNA-associated protein 15; AltName: Full=U3 protein 15 required for transcription && PF09384:UTP15 C terminal                                                                                                                                                                                                                                        |
| Lachesis_group0__13_contigs__l.g5623  | 1420.698 | 270.7019 | 2.392009 | 5.73E-05 | 0.001192 | 3048 | - && Q01371.2 RecName: Full=White collar 1 protein; Short=WC1 && PF08447:PAS fold PF13426:PAS domain                                                                                                                                                                                                                                                                                                                                       |



|                                      |          |          |          |          |          |      |                                                                                                                                                                                                                                               |
|--------------------------------------|----------|----------|----------|----------|----------|------|-----------------------------------------------------------------------------------------------------------------------------------------------------------------------------------------------------------------------------------------------|
| Lachesis_group0__13_contigs__l.g5950 | 125.491  | 23.81652 | 2.389426 | 0.005834 | 0.032219 | 2322 | - && Q6BQU8.2 RecName: Full=Nitrogen permease regulator 3; AltName: Full=Required for meiotic nuclear division protein 11; Flags: Precursor && PF03666:Nitrogen Permease regulator of amino acid transport activity 3                         |
| Lachesis_group0__13_contigs__l.g2215 | 7719.644 | 1475.059 | 2.387854 | 0.000261 | 0.003498 | 1509 | - && Q70LM3.1 RecName: Full=Manganese peroxidase 2; Short=MnP2; AltName: Full=Manganese peroxidase isozyme 2; Flags: Precursor && PF11895:Domain of unknown function (DUF3415) PF00141:Peroxidase                                             |
| Lachesis_group0__13_contigs__l.g6436 | 744.0688 | 142.2982 | 2.386372 | 0.000131 | 0.002187 | 849  | - && Q0VD01.1 RecName: Full=U3 small nucleolar ribonucleoprotein protein IMP4; Short=U3 snoRNP protein IMP4 && PF04427:Brix domain                                                                                                            |
| Lachesis_group0__13_contigs__l.g2446 | 140.6135 | 26.80226 | 2.382914 | 0.000544 | 0.00594  | 1794 | - && Q9UUA2.1 RecName: Full=ATP-dependent DNA helicase pfh1; AltName: Full=DNA repair and recombination helicase pfh1; AltName: Full=PIF1 helicase homolog; AltName: Full=RRM3/PIF1 homolog 1; Flags: Precursor && PF05970:PIF1-like helicase |
| Lachesis_group0__13_contigs__l.g8820 | 1434.583 | 275.3593 | 2.381708 | 3.13E-06 | 0.000148 | 543  | - && Q9D187.1 RecName: Full=Mitotic spindle-associated MMXD complex subunit MIP18; AltName: Full=Protein FAM96B && PF01883:Domain of unknown function DUF59                                                                                   |
| Lachesis_group0__13_contigs__l.g997  | 683.968  | 131.425  | 2.379132 | 5.95E-06 | 0.000238 | 1095 | - && O14180.1 RecName: Full=Brix domain-containing protein C4F8.04 && PF04427:Brix domain                                                                                                                                                     |
| Lachesis_group0__13_contigs__l.g5328 | 89.17354 | 17.33261 | 2.368933 | 0.000135 | 0.00222  | 2970 | - && Q10213.1 RecName: Full=ATP-dependent DNA helicase srs2 && PF13361:UvrD-like helicase                                                                                                                                                     |

|                                       |          |          |          |          |          |      |                                                                                                                                                                                                                                                                              |
|---------------------------------------|----------|----------|----------|----------|----------|------|------------------------------------------------------------------------------------------------------------------------------------------------------------------------------------------------------------------------------------------------------------------------------|
|                                       |          |          |          |          |          |      | C-terminal domain PF00580:UvrD/REP helicase N-terminal domain                                                                                                                                                                                                                |
| Lachesis_group0__13_contigs__l.g10027 | 402.3039 | 78.20682 | 2.364611 | 0.000526 | 0.005794 | 2718 | - && P40377.1 RecName: Full=DNA replication licensing factor mcm2; AltName: Full=Cell division control protein 19; AltName: Full=Minichromosome maintenance protein 2 && PF12619:Mini-chromosome maintenance protein 2 PF00493:MCM2/3/5 family PF14551:MCM N-terminal domain |
| Lachesis_group0__13_contigs__l.g8591  | 1093.397 | 213.2431 | 2.358716 | 1.19E-06 | 7.30E-05 | 2670 | - && A5PJS6.1 RecName: Full=Ubiquitin carboxyl-terminal hydrolase 10; AltName: Full=Deubiquitinating enzyme 10; AltName: Full=Ubiquitin thioesterase 10; AltName: Full=Ubiquitin-specific-processing protease 10 && PF00443:Ubiquitin carboxyl-terminal hydrolase            |
| Lachesis_group0__13_contigs__l.g8683  | 2870.885 | 560.2254 | 2.357569 | 1.30E-06 | 7.91E-05 | 759  | - && P38523.1 RecName: Full=GrpE protein homolog, mitochondrial; Flags: Precursor && PF01025:GrpE                                                                                                                                                                            |
| Lachesis_group0__13_contigs__l.g5212  | 6009.024 | 1175.952 | 2.353464 | 1.90E-06 | 0.000102 | 1251 | - && O13982.1 RecName: Full=Uncharacterized WD repeat-containing protein C25H1.08c && PF00400:WD domain, G-beta repeat                                                                                                                                                       |
| Lachesis_group0__13_contigs__l.g6922  | 618.2401 | 122.0463 | 2.341875 | 2.55E-05 | 0.000668 | 2373 | - && A8P7F7.1 RecName: Full=Nucleolar protein 9; AltName: Full=Pumilio domain-containing protein NOP9 && -                                                                                                                                                                   |
| Lachesis_group0__13_contigs__l.g129   | 299.525  | 59.43487 | 2.337331 | 6.49E-06 | 0.000253 | 1779 | - && P0CS53.1 RecName: Full=tRNA (guanine-N(7)-)-methyltransferase non-catalytic subunit TRM82; AltName: Full=Transfer RNA methyltransferase 82 && -                                                                                                                         |

|                                       |          |          |          |          |          |      |                                                                                                                                                                                                                                                                                         |
|---------------------------------------|----------|----------|----------|----------|----------|------|-----------------------------------------------------------------------------------------------------------------------------------------------------------------------------------------------------------------------------------------------------------------------------------------|
| Lachesis_group0__13_contigs__l.g10384 | 438.6577 | 86.9718  | 2.333636 | 0.000182 | 0.002706 | 1980 | - && Q99741.1 RecName: Full=Cell division control protein 6 homolog; AltName: Full=CDC6-related protein; AltName: Full=Cdc18-related protein; Short=HsCdc18; AltName: Full=p62(cdc6); Short=HsCDC6 && PF13401:AAA domain                                                                |
| Lachesis_group0__13_contigs__l.g545   | 4868.308 | 968.9872 | 2.329195 | 5.50E-06 | 0.000227 | 1437 | - && P54872.2 RecName: Full=Hydroxymethylglutaryl-CoA synthase A; Short=HMG-CoA synthase A; AltName: Full=3-hydroxy-3-methylglutaryl coenzyme A synthase A && PF01154:Hydroxymethylglutaryl-coenzyme A synthase N terminal PF08540:Hydroxymethylglutaryl-coenzyme A synthase C terminal |
| Lachesis_group0__13_contigs__l.g9563  | 374.4793 | 74.56514 | 2.328994 | 0.000276 | 0.003668 | 837  | - && - && PF08208:DNA-directed RNA polymerase I subunit RPA34.5                                                                                                                                                                                                                         |
| Lachesis_group0__13_contigs__l.g11087 | 339.965  | 68.16407 | 2.319975 | 2.81E-05 | 0.000707 | 891  | - && - && PF07890:Rrp15p                                                                                                                                                                                                                                                                |
| Lachesis_group0__13_contigs__l.g5539  | 448.5628 | 89.85741 | 2.318673 | 5.89E-05 | 0.001215 | 594  | - && Q4X0T4.1 RecName: Full=Required for respiratory growth protein 9, mitochondrial; Flags: Precursor >B0XSW5.1 RecName: Full=Required for respiratory growth protein 9, mitochondrial; Flags: Precursor && PF06413:Neugrin                                                            |
| Lachesis_group0__13_contigs__l.g6690  | 535.4862 | 107.6062 | 2.314964 | 2.91E-06 | 0.000141 | 1764 | - && P94547.1 RecName: Full=Long-chain-fatty-acid--CoA ligase; AltName: Full=Long-chain acyl-CoA synthetase && PF13193:AMP-binding enzyme C-terminal domain PF00501:AMP-binding enzyme                                                                                                  |
| Lachesis_group0__13_contigs__l.g4690  | 730.5487 | 147.6399 | 2.308155 | 1.31E-05 | 0.000411 | 981  | - && - && PF01738:Dienelactone hydrolase family                                                                                                                                                                                                                                         |

|                                       |          |          |          |          |          |      |                                                                                                                                                                                                                                                                      |
|---------------------------------------|----------|----------|----------|----------|----------|------|----------------------------------------------------------------------------------------------------------------------------------------------------------------------------------------------------------------------------------------------------------------------|
| Lachesis_group0__13_contigs__l.g7107  | 77.75996 | 15.78456 | 2.307258 | 0.000788 | 0.007768 | 1170 | - && Q29RY4.1 RecName: Full=Zinc phosphodiesterase ELAC protein 1; AltName: Full=ElaC homolog protein 1; AltName: Full=Ribonuclease Z 1; Short=RNase Z 1; AltName: Full=tRNA 3 endonuclease 1; AltName: Full=tRNase Z 1 && PF12706:Beta-lactamase superfamily domain |
| Lachesis_group0__13_contigs__l.g27    | 176.318  | 35.48353 | 2.307133 | 4.52E-05 | 0.001    | 918  | - && - && PF06221:Putative zinc finger motif, C2HC5-type                                                                                                                                                                                                             |
| Lachesis_group0__13_contigs__l.g4741  | 89.49948 | 18.04744 | 2.305977 | 0.000107 | 0.001904 | 1152 | - && - && PF00326:Prolyl oligopeptidase family PF07859:alpha/beta hydrolase fold                                                                                                                                                                                     |
| Lachesis_group0__13_contigs__l.g5164  | 770.7655 | 156.7492 | 2.298682 | 3.23E-06 | 0.000151 | 627  | - && Q09191.1 RecName: Full=DNA-directed RNA polymerases I, II, and III subunit RPABC1; Short=RNA polymerases I, II, and III subunit ABC1; AltName: Full=RPC24B && PF01191:RNA polymerase Rpb5, C-terminal domain PF03871:RNA polymerase Rpb5, N-terminal domain     |
| Lachesis_group0__13_contigs__l.g8685  | 842.1214 | 171.4984 | 2.296853 | 2.86E-07 | 2.61E-05 | 1188 | - && - && PF13324:Grap2 and cyclin-D-interacting                                                                                                                                                                                                                     |
| Lachesis_group0__13_contigs__l.g11544 | 1650.804 | 336.465  | 2.295409 | 2.60E-05 | 0.000673 | 3324 | - && O13282.1 RecName: Full=Transcription initiation factor TFIID subunit 5; AltName: Full=Transcription initiation factor TFIID 72 kDa subunit; Short=TAFII-72 && PF00400:WD domain, G-beta repeat PF04494:WD40 associated region in TFIID subunit, NTD2 domain     |
| Lachesis_group0__13_contigs__l.g2416  | 621.3865 | 126.8127 | 2.294625 | 4.00E-05 | 0.000923 | 3228 | - && Q9P7S5.1 RecName: Full=Probable ubiquitin carboxyl-terminal hydrolase 7; AltName: Full=Deubiquitinating enzyme 7; AltName:                                                                                                                                      |

|                                       |          |          |          |          |          |      |                                                                                                                                                                                                                                                     |
|---------------------------------------|----------|----------|----------|----------|----------|------|-----------------------------------------------------------------------------------------------------------------------------------------------------------------------------------------------------------------------------------------------------|
|                                       |          |          |          |          |          |      | Full=Ubiquitin thioesterase 7; AltName: Full=Ubiquitin-specific-processing protease 7 && PF00443:Ubiquitin carboxyl-terminal hydrolase                                                                                                              |
| Lachesis_group0__13_contigs__l.g554   | 357.9818 | 73.02876 | 2.293832 | 2.23E-05 | 0.000604 | 2505 | - && Q9Y7R3.1 RecName: Full=Condensin complex subunit 2; AltName: Full=Barren homolog; AltName: Full=CAPH homolog; AltName: Full=p105 && PF05786:Condensin complex subunit 2                                                                        |
| Lachesis_group0__13_contigs__l.g11370 | 203.3816 | 41.54738 | 2.293007 | 4.52E-05 | 0.001    | 1788 | - && O74397.1 RecName: Full=Asparagine synthetase domain-containing protein C4F6.11c && PF00733:Asparagine synthase                                                                                                                                 |
| Lachesis_group0__13_contigs__l.g5967  | 13356.3  | 2731.788 | 2.289669 | 0.00108  | 0.009782 | 474  | - && - && PF01185:Fungal hydrophobin                                                                                                                                                                                                                |
| Lachesis_group0__13_contigs__l.g676   | 128.0679 | 26.19261 | 2.287457 | 0.000308 | 0.003931 | 2580 | - && - && PF11559:Afadin- and alpha -actinin-Binding                                                                                                                                                                                                |
| Lachesis_group0__13_contigs__l.g8472  | 2967.258 | 608.61   | 2.285576 | 1.11E-05 | 0.000368 | 1500 | - && Q51342.3 RecName: Full=Amidophosphoribosyltransferase; Short=ATase; AltName: Full=Glutamine phosphoribosylpyrophosphate amidotransferase; Short=GPATase && PF00156:Phosphoribosyl transferase domain PF13522:Glutamine amidotransferase domain |
| Lachesis_group0__13_contigs__l.g8217  | 39.03397 | 8.058027 | 2.284147 | 0.002986 | 0.019947 | 849  | - && - && PF06544:Protein of unknown function (DUF1115)                                                                                                                                                                                             |
| Lachesis_group0__13_contigs__l.g10512 | 7226.211 | 1484.1   | 2.283819 | 8.02E-07 | 5.69E-05 | 3609 | - && Q11119.2 RecName: Full=Ubiquitin carboxyl-terminal hydrolase 14; AltName: Full=Deubiquitinating enzyme 14; AltName: Full=UBA domain-containing protein 2; AltName: Full=Ubiquitin thioesterase 14; AltName:                                    |

|                                       |          |          |          |          |          |      |                                                                                                                                                                                                                                       |
|---------------------------------------|----------|----------|----------|----------|----------|------|---------------------------------------------------------------------------------------------------------------------------------------------------------------------------------------------------------------------------------------|
|                                       |          |          |          |          |          |      | Full=Ubiquitin-specific-processing protease 14 && PF00956:Nucleosome assembly protein (NAP) PF00627:UBA/TS-N domain PF02148:Zn-finger in ubiquitin-hydrolases and other protein PF00443:Ubiquitin carboxyl-terminal hydrolase         |
| Lachesis_group0__13_contigs__l.g10381 | 269.5999 | 55.66886 | 2.278656 | 1.22E-05 | 0.000393 | 1665 | - && - && PF07535:DBF zinc finger PF08630:Dfp1/Him1, central region                                                                                                                                                                   |
| Lachesis_group0__13_contigs__l.g9169  | 419.7513 | 87.16966 | 2.271859 | 7.99E-05 | 0.001546 | 1494 | - && - && PF00226:DnaJ domain                                                                                                                                                                                                         |
| Lachesis_group0__13_contigs__l.g6442  | 1805.489 | 374.4955 | 2.269481 | 3.57E-05 | 0.000835 | 1218 | - && Q9C167.2 RecName: Full=Ribonucleoside-diphosphate reductase small chain; AltName: Full=Ribonucleotide reductase small subunit && PF00268:Ribonucleotide reductase, small chain                                                   |
| Lachesis_group0__13_contigs__l.g476   | 103.9026 | 21.51779 | 2.267942 | 0.00033  | 0.004137 | 1641 | - && - && PF12937:F-box-like                                                                                                                                                                                                          |
| Lachesis_group0__13_contigs__l.g7294  | 132.9519 | 27.46804 | 2.265998 | 0.001022 | 0.009423 | 4167 | - && - && PF12770:CHAT domain                                                                                                                                                                                                         |
| Lachesis_group0__13_contigs__l.g11551 | 1602.671 | 333.7052 | 2.263972 | 6.17E-06 | 0.000243 | 1401 | - && P40510.1 RecName: Full=D-3-phosphoglycerate dehydrogenase 2; Short=3-PGDH 2 && PF00389:D-isomer specific 2-hydroxyacid dehydrogenase, catalytic domain PF02826:D-isomer specific 2-hydroxyacid dehydrogenase, NAD binding domain |
| Lachesis_group0__13_contigs__l.g4274  | 203.3295 | 42.24485 | 2.259848 | 0.003578 | 0.022774 | 3114 | - && Q9W689.1 RecName: Full=Ataxin-3; AltName: Full=Machado-Joseph disease protein 1 homolog && PF02099:Josephin PF03595:Voltage-dependent anion channel                                                                              |
| Lachesis_group0__13_contigs__l.g2229  | 1388.397 | 290.3733 | 2.257931 | 1.74E-05 | 0.000515 | 1362 | - && Q7ZYQ6.1 RecName: Full=DDB1- and CUL4-associated factor 13; AltName: Full=WD repeat and SOF domain-containing protein 1 &&                                                                                                       |

|                                       |          |          |          |          |          |      |                                                                                                                                                                                                                                                                                                        |
|---------------------------------------|----------|----------|----------|----------|----------|------|--------------------------------------------------------------------------------------------------------------------------------------------------------------------------------------------------------------------------------------------------------------------------------------------------------|
|                                       |          |          |          |          |          |      | PF04158:Sof1-like domain PF00400:WD domain, G-beta repeat                                                                                                                                                                                                                                              |
| Lachesis_group0__13_contigs__l.g11550 | 1295.34  | 271.3919 | 2.255482 | 1.13E-06 | 7.12E-05 | 1680 | - && O94303.3 RecName: Full=Imidazole glycerol phosphate synthase hisHF; Short=IGP synthase; Short=IGPS; Short=ImGP synthase; Includes: RecName: Full=Glutamine amidotransferase; Includes: RecName: Full=Cyclase && PF00117:Glutamine amidotransferase class-I PF00977:Histidine biosynthesis protein |
| Lachesis_group0__13_contigs__l.g9241  | 419.8764 | 88.06464 | 2.25367  | 9.79E-05 | 0.001778 | 2349 | - && O75001.1 RecName: Full=DNA replication licensing factor mcm7; AltName: Full=Minichromosome maintenance protein 7 && PF00493:MCM2/3/5 family PF14551:MCM N-terminal domain                                                                                                                         |
| Lachesis_group0__13_contigs__l.g8476  | 758.7456 | 159.4427 | 2.251466 | 2.00E-05 | 0.000561 | 975  | - && Q08235.2 RecName: Full=Ribosome biogenesis protein BRX1 && PF04427:Brix domain                                                                                                                                                                                                                    |
| Lachesis_group0__13_contigs__l.g6400  | 236.2583 | 49.67749 | 2.248577 | 5.12E-06 | 0.000215 | 990  | - && P0CL97.1 RecName: Full=Pre-rRNA-processing protein ESF2; AltName: Full=18S rRNA factor 2 >P0CL96.1 RecName: Full=Pre-rRNA-processing protein ESF2; AltName: Full=18S rRNA factor 2 && -                                                                                                           |
| Lachesis_group0__13_contigs__l.g6398  | 1085.83  | 229.0041 | 2.24639  | 5.29E-06 | 0.000221 | 4278 | - && P87323.1 RecName: Full=Response regulator mcs4; AltName: Full=Mitotic catastrophe suppressor 4 && PF00072:Response regulator receiver domain                                                                                                                                                      |
| Lachesis_group0__13_contigs__l.g7105  | 56.90866 | 11.96281 | 2.24443  | 0.00788  | 0.04012  | 513  | - && - && PF04430:Protein of unknown function (DUF498/DUF598)                                                                                                                                                                                                                                          |

|                                       |          |          |          |          |          |      |                                                                                                                                                                                                                                                     |
|---------------------------------------|----------|----------|----------|----------|----------|------|-----------------------------------------------------------------------------------------------------------------------------------------------------------------------------------------------------------------------------------------------------|
| Lachesis_group0__13_contigs__l.g5596  | 313.5047 | 66.16852 | 2.243503 | 9.39E-05 | 0.001741 | 1395 | - && O13632.1 RecName: Full=Tyrosine-protein phosphatase yvh1; Short=PTPase yvh1 && PF00782: Dual specificity phosphatase, catalytic domain                                                                                                         |
| Lachesis_group0__13_contigs__l.g2141  | 751.7058 | 159.1094 | 2.241823 | 1.93E-05 | 0.00055  | 1203 | - && - && PF15459: 60S ribosome biogenesis protein Rrp14   PF04935: Surfeit locus protein 6                                                                                                                                                         |
| Lachesis_group0__13_contigs__l.g4542  | 226.4742 | 47.98693 | 2.240872 | 0.001123 | 0.010042 | 1317 | - && O59790.2 RecName: Full=Serine/threonine-protein kinase ark1; AltName: Full=Aurora-related kinase 1 && PF00069: Protein kinase domain                                                                                                           |
| Lachesis_group0__13_contigs__l.g4540  | 225.7752 | 48.1908  | 2.233141 | 0.000415 | 0.004886 | 921  | - && Q6ME51.1 RecName: Full=50S ribosomal protein L5 && PF00673: ribosomal L5P family C-terminus                                                                                                                                                    |
| Lachesis_group0__13_contigs__l.g11128 | 1598.96  | 340.5939 | 2.231193 | 2.52E-06 | 0.000126 | 4425 | - && O74835.1 RecName: Full=rRNA biogenesis protein rrp5; AltName: Full=Ribosomal RNA-processing protein 5; AltName: Full=U3 small nucleolar RNA-associated protein rrp5; Short=U3 snoRNA-associated protein rrp5 && PF00575: S1 RNA binding domain |
| Lachesis_group0__13_contigs__l.g7938  | 886.8023 | 189.0762 | 2.230602 | 7.73E-05 | 0.001504 | 1764 | - && O14360.1 RecName: Full=H/ACA ribonucleoprotein complex non-core subunit NAF1; AltName: Full=Nuclear assembly factor 1 && PF04410: Gar1/Naf1 RNA binding region                                                                                 |
| Lachesis_group0__13_contigs__l.g1212  | 395.6761 | 84.66623 | 2.225856 | 2.98E-05 | 0.000733 | 663  | - && Q7S5W9.1 RecName: Full=Phosphatidyl-N-methylethanolamine N-methyltransferase; AltName: Full=Cholineless-2; AltName: Full=Phospholipid methyltransferase; Short=PLMT && PF04191: Phospholipid methyltransferase                                 |



|                                       |          |          |          |          |          |      |                                                                                                                                                                                                                                                                                                  |
|---------------------------------------|----------|----------|----------|----------|----------|------|--------------------------------------------------------------------------------------------------------------------------------------------------------------------------------------------------------------------------------------------------------------------------------------------------|
| Lachesis_group0__13_contigs__l.g3156  | 103.8233 | 22.02616 | 2.225193 | 0.001925 | 0.014704 | 1335 | - && Q6NU95.1 RecName: Full=RNA polymerase II-associated protein 3 && PF13414:TPR repeat                                                                                                                                                                                                         |
| Lachesis_group0__13_contigs__l.g9080  | 307.491  | 65.86469 | 2.221756 | 2.19E-05 | 0.000597 | 693  | - && - && PF04930:FUN14 family                                                                                                                                                                                                                                                                   |
| Lachesis_group0__13_contigs__l.g10727 | 744.1999 | 160.3011 | 2.21478  | 5.32E-06 | 0.000222 | 1383 | - && P08465.2 RecName: Full=Homoserine O-acetyltransferase; AltName: Full=Homoserine O-trans-acetylase && PF00561:alpha/beta hydrolase fold                                                                                                                                                      |
| Lachesis_group0__13_contigs__l.g8181  | 320.7479 | 69.10593 | 2.214624 | 0.00037  | 0.004501 | 1275 | - && P17898.3 RecName: Full=Cholinephosphotransferase 1; AltName: Full=Aminoalcohol phosphotransferase CPT1; AltName: Full=Diacylglycerol cholinephosphotransferase 1; AltName: Full=Sn-1,2-diacylglycerol cholinephosphotransferase; Short=CHOPT && PF01066:CDP-alcohol phosphatidyltransferase |
| Lachesis_group0__13_contigs__l.g7939  | 142.5364 | 30.88308 | 2.214352 | 0.000265 | 0.003555 | 1812 | - && - && PF15275:PEHE domain                                                                                                                                                                                                                                                                    |
| Lachesis_group0__13_contigs__l.g5797  | 217.1785 | 46.96549 | 2.212424 | 0.000301 | 0.003877 | 1071 | - && - && PF06966:Protein of unknown function (DUF1295)                                                                                                                                                                                                                                          |
| Lachesis_group0__13_contigs__l.g11214 | 258.7309 | 56.0342  | 2.211286 | 0.000112 | 0.00195  | 1137 | - && P42023.1 RecName: Full=Actin-2; AltName: Full=Actin II; AltName: Full=Centractin-like protein [Pneumocystis carinii] && PF00022:Actin                                                                                                                                                       |
| Lachesis_group0__13_contigs__l.g2197  | 2418.567 | 524.3511 | 2.205521 | 1.74E-06 | 9.58E-05 | 2337 | - && - && PF13813:Membrane bound O-acyl transferase family                                                                                                                                                                                                                                       |
| Lachesis_group0__13_contigs__l.g10100 | 5370.293 | 1168.343 | 2.200472 | 1.75E-07 | 1.90E-05 | 1488 | - && Q9LK73.1 RecName: Full=UDP-glycosyltransferase 88A1 && PF00201:UDP-glucuronosyl and UDP-glucosyl transferase                                                                                                                                                                                |
| Lachesis_group0__13_contigs__l.g10132 | 1719.248 | 374.7093 | 2.198579 | 2.61E-05 | 0.000674 | 2502 | - && P0CQ95.1 RecName: Full=ATP-dependent RNA helicase DBP7 >P0CQ94.1 RecName:                                                                                                                                                                                                                   |

|                                       |          |          |          |          |          |      |                                                                                                                                                                                                    |
|---------------------------------------|----------|----------|----------|----------|----------|------|----------------------------------------------------------------------------------------------------------------------------------------------------------------------------------------------------|
|                                       |          |          |          |          |          |      | Full=ATP-dependent RNA helicase DBP7 && PF13959:Domain of unknown function (DUF4217) PF00270:DEAD/DEAH box helicase PF00271:Helicase conserved C-terminal domain                                   |
| Lachesis_group0__13_contigs__l.g9594  | 768.8381 | 167.5451 | 2.198322 | 0.001869 | 0.014411 | 1008 | - && Q5XGR8.1 RecName: Full=Endoribonuclease LACTB2; AltName: Full=Beta-lactamase-like protein 2 && PF00753:Metallo-beta-lactamase superfamily                                                     |
| Lachesis_group0__13_contigs__l.g11075 | 4872.271 | 1062.577 | 2.197202 | 2.03E-06 | 0.000107 | 1599 | - && G5EB89.1 RecName: Full=Importin subunit alpha; AltName: Full=Karyopherin alpha && PF16186:Atypical Arm repeat PF01749:Importin beta binding domain PF00514:Armadillo/beta-catenin-like repeat |
| Lachesis_group0__13_contigs__l.g11619 | 154.7944 | 34.13156 | 2.186548 | 0.001807 | 0.013998 | 2634 | - && P52958.1 RecName: Full=Cutinase transcription factor 1 alpha && PF04082:Fungal specific transcription factor domain                                                                           |
| Lachesis_group0__13_contigs__l.g10711 | 102.2928 | 22.70427 | 2.182104 | 0.000528 | 0.0058   | 750  | - && P0CR67.1 RecName: Full=Probable kinetochore protein SPC25 >P0CR66.1 RecName: Full=Probable kinetochore protein SPC25 && PF08234:Chromosome segregation protein Spc25                          |
| Lachesis_group0__13_contigs__l.g975   | 762.1244 | 168.3173 | 2.179627 | 5.21E-07 | 4.22E-05 | 612  | - && Q64520.2 RecName: Full=Guanylate kinase; AltName: Full=GMP kinase && PF00625:Guanylate kinase                                                                                                 |
| Lachesis_group0__13_contigs__l.g6146  | 6168.782 | 1363.522 | 2.177811 | 2.18E-05 | 0.000596 | 1731 | - && P38861.3 RecName: Full=60S ribosomal export protein NMD3; AltName: Full=Nonsense-mediated mRNA decay protein 3 && PF04981:NMD3 family                                                         |

|                                       |          |          |          |          |          |      |                                                                                                                                                                                                                             |
|---------------------------------------|----------|----------|----------|----------|----------|------|-----------------------------------------------------------------------------------------------------------------------------------------------------------------------------------------------------------------------------|
| Lachesis_group0__13_contigs__l.g9957  | 4923.022 | 1088.222 | 2.177229 | 0.00057  | 0.006132 | 2034 | - && O34355.1 RecName: Full=Putative amidohydrolase YtcJ && PF07969:Amidohydrolase family                                                                                                                                   |
| Lachesis_group0__13_contigs__l.g11376 | 405.7006 | 89.84886 | 2.173863 | 0.001122 | 0.010042 | 1725 | - && - && PF02194:PX A domain PF08628:Sorting nexin C terminal                                                                                                                                                              |
| Lachesis_group0__13_contigs__l.g8819  | 3641.215 | 807.1017 | 2.173418 | 1.10E-05 | 0.000367 | 1038 | - && A1D3T4.1 RecName: Full=Probable arabinogalactan endo-beta-1,4-galactanase A; AltName: Full=Endo-1,4-beta-galactanase A; Short=Galactanase A; Flags: Precursor && PF07745:Glycosyl hydrolase family 53                  |
| Lachesis_group0__13_contigs__l.g5006  | 123.1404 | 27.23914 | 2.171116 | 5.76E-05 | 0.001195 | 825  | - && - && PF01138:3' exoribonuclease family, domain 1                                                                                                                                                                       |
| Lachesis_group0__13_contigs__l.g11297 | 1407.155 | 313.9018 | 2.164503 | 3.11E-05 | 0.000757 | 729  | - && Q4P4X6.2 RecName: Full=Eukaryotic translation initiation factor 3 subunit K; Short=eIF3k; AltName: Full=eIF-3 p25 && PF10075:CSN8/PSMD8/EIF3K family                                                                   |
| Lachesis_group0__13_contigs__l.g8303  | 463.9817 | 103.7458 | 2.164027 | 2.82E-05 | 0.000707 | 3084 | - && P87137.1 RecName: Full=Uncharacterized protein C57A7.06 && PF04615:Utp14 protein                                                                                                                                       |
| Lachesis_group0__13_contigs__l.g4172  | 243.4452 | 54.57197 | 2.159314 | 5.12E-05 | 0.001087 | 1209 | - && Q8XJL8.1 RecName: Full=Probable serine/threonine-protein kinase CPE1738 && PF00069:Protein kinase domain                                                                                                               |
| Lachesis_group0__13_contigs__l.g6808  | 357.6911 | 80.26497 | 2.158721 | 4.18E-05 | 0.000948 | 1047 | - && - && PF17104:Domain of unknown function (DUF5102)                                                                                                                                                                      |
| Lachesis_group0__13_contigs__l.g4599  | 138.1183 | 30.9912  | 2.157132 | 0.000385 | 0.004651 | 1476 | - && P38121.1 RecName: Full=DNA polymerase alpha subunit B; AltName: Full=DNA polymerase I subunit B; AltName: Full=DNA polymerase alpha:primase complex p86 subunit; Short=Pol alpha-primase complex p86 subunit; AltName: |

|                                       |          |          |          |          |          |      |                                                                                                                                                                                                                                     |
|---------------------------------------|----------|----------|----------|----------|----------|------|-------------------------------------------------------------------------------------------------------------------------------------------------------------------------------------------------------------------------------------|
|                                       |          |          |          |          |          |      | Full=DNA polymerase-primase complex p74 subunit && PF04042:DNA polymerase alpha/epsilon subunit B PF08418:DNA polymerase alpha subunit B N-terminal                                                                                 |
| Lachesis_group0__13_contigs__l.g1011  | 1214.087 | 272.4091 | 2.156543 | 2.11E-05 | 0.000583 | 3585 | - && O94372.1 RecName: Full=Uncharacterized protein C1604.06c && PF03914:CBF/Mak21 family                                                                                                                                           |
| Lachesis_group0__13_contigs__l.g2684  | 278.5482 | 62.68946 | 2.153278 | 0.000978 | 0.009115 | 1461 | - && - && PF01612:3'-5' exonuclease                                                                                                                                                                                                 |
| Lachesis_group0__13_contigs__l.g6635  | 1202.599 | 270.3676 | 2.15321  | 5.60E-06 | 0.000228 | 2850 | - && Q9LYG9.1 RecName: Full=Mechanosensitive ion channel protein 10; AltName: Full=Mechanosensitive channel of small conductance-like 10; AltName: Full=MscS-Like protein 10; Short=AtMSL10 && PF00924:Mechanosensitive ion channel |
| Lachesis_group0__13_contigs__l.g4718  | 90.89977 | 20.43317 | 2.152078 | 0.001281 | 0.010975 | 1413 | - && Q54DL6.1 RecName: Full=SET and MYND domain-containing protein DDB_G0292140 && PF01753:MYND finger PF00856:SET domain                                                                                                           |
| Lachesis_group0__13_contigs__l.g7426  | 434.237  | 97.86888 | 2.151635 | 0.00018  | 0.002681 | 1203 | - && - && PF12923:Ribosomal RNA-processing protein 7 (RRP7)                                                                                                                                                                         |
| Lachesis_group0__13_contigs__l.g6208  | 881.9539 | 198.6466 | 2.150659 | 9.73E-06 | 0.000335 | 1023 | - && A8P7Y3.1 RecName: Full=S-methyl-5'-thioadenosine phosphorylase; AltName: Full=5'-methylthioadenosine phosphorylase; Short=MTA phosphorylase; Short=MTAP; Short=MTAPase && PF01048:Phosphorylase superfamily                    |
| Lachesis_group0__13_contigs__l.g8950  | 53.77453 | 12.33206 | 2.144676 | 0.007727 | 0.039635 | 711  | - && Q503L4.2 RecName: Full=Isoamyl acetate-hydrolyzing esterase 1 homolog && PF00657:GDSL-like Lipase/Acylhydrolase                                                                                                                |
| Lachesis_group0__13_contigs__l.g10881 | 765.1999 | 173.0625 | 2.144298 | 2.99E-05 | 0.000733 | 1215 | - && Q9HE11.2 RecName: Full=U3 small nucleolar RNA-associated protein 5; Short=U3 snoRNA-                                                                                                                                           |

|                                       |          |          |          |          |          |      |                                                                                                                                                                                                                                                 |
|---------------------------------------|----------|----------|----------|----------|----------|------|-------------------------------------------------------------------------------------------------------------------------------------------------------------------------------------------------------------------------------------------------|
|                                       |          |          |          |          |          |      | associated protein 5; AltName: Full=U3 protein 5 required for transcription && PF04003:Dip2/Utp12 Family                                                                                                                                        |
| Lachesis_group0__13_contigs__l.g9807  | 1208.244 | 274.2723 | 2.139899 | 4.19E-05 | 0.000949 | 1260 | - && - && PF14976:FAM72 protein                                                                                                                                                                                                                 |
| Lachesis_group0__13_contigs__l.g5790  | 400.6897 | 90.81522 | 2.138745 | 0.000459 | 0.005278 | 1764 | - && O13345.1 RecName: Full=O-methylsterigmatocystin oxidoreductase; Short=OMST oxidoreductase; AltName: Full=Aflatoxin B synthase; AltName: Full=Aflatoxin biosynthesis protein Q; AltName: Full=Cytochrome P450 64 && PF00067:Cytochrome P450 |
| Lachesis_group0__13_contigs__l.g10960 | 1196.742 | 272.3823 | 2.135711 | 0.002065 | 0.015461 | 1830 | - && A1CFL2.1 RecName: Full=Dehydrogenase patE; AltName: Full=Patulin synthesis protein E; Flags: Precursor && PF00732:GMC oxidoreductase PF05199:GMC oxidoreductase                                                                            |
| Lachesis_group0__13_contigs__l.g11136 | 1422.771 | 324.0445 | 2.134713 | 7.57E-06 | 0.000285 | 3372 | - && Q10190.1 RecName: Full=Large subunit GTPase 1 && PF01926:50S ribosome-binding GTPase PF00150:Cellulase (glycosyl hydrolase family 5) PF00734:Fungal cellulose binding domain                                                               |
| Lachesis_group0__13_contigs__l.g11301 | 1754.935 | 400.964  | 2.130549 | 2.74E-05 | 0.000696 | 1869 | - && A8N1X3.1 RecName: Full=Pescadillo homolog; AltName: Full=Nucleolar protein 7 homolog && PF16589:BRCT domain, a BRCA1 C-terminus domain PF06732:Pescadillo N-terminus                                                                       |
| Lachesis_group0__13_contigs__l.g9064  | 683.2468 | 156.5292 | 2.126978 | 1.80E-05 | 0.000528 | 1929 | - && Q4P9E5.2 RecName: Full=ATP-dependent rRNA helicase SPB4 && PF00270:DEAD/DEAH box helicase PF00271:Helicase conserved C-                                                                                                                    |

|                                       |          |          |          |          |          |      |                                                                                                                                                     |
|---------------------------------------|----------|----------|----------|----------|----------|------|-----------------------------------------------------------------------------------------------------------------------------------------------------|
|                                       |          |          |          |          |          |      | terminal domain PF13959:Domain of unknown function (DUF4217)                                                                                        |
| Lachesis_group0__13_contigs__l.g10677 | 2601.015 | 595.8889 | 2.126377 | 1.20E-05 | 0.00039  | 1863 | - && P0CQ78.1 RecName: Full=ATP-dependent RNA helicase DBP3 && PF00270:DEAD/DEAH box helicase PF00271:Helicase conserved C-terminal domain          |
| Lachesis_group0__13_contigs__l.g7907  | 1906.692 | 437.3521 | 2.123474 | 0.000105 | 0.001875 | 1212 | - && Q9SAJ7.2 RecName: Full=Metal tolerance protein 9; Short=AtMTP9 && PF01545:Cation efflux family PF16916:Dimerisation domain of Zinc Transporter |
| Lachesis_group0__13_contigs__l.g8975  | 196.1272 | 44.94633 | 2.120618 | 0.000224 | 0.003166 | 876  | - && Q9UT16.2 RecName: Full=Protein atp12, mitochondrial; Flags: Precursor && PF07542:ATP12 chaperone protein                                       |
| Lachesis_group0__13_contigs__l.g6389  | 454.6752 | 104.633  | 2.120017 | 0.000746 | 0.007463 | 3042 | - && Q8K2V6.1 RecName: Full=Importin-11; Short=Imp11; AltName: Full=Ran-binding protein 11; Short=RanBP11 && -                                      |
| Lachesis_group0__13_contigs__l.g4736  | 1300.757 | 299.6291 | 2.118475 | 1.35E-05 | 0.000421 | 1344 | - && Q99078.2 RecName: Full=Dual specificity protein kinase FUZ7 && PF00069:Protein kinase domain                                                   |
| Lachesis_group0__13_contigs__l.g6921  | 1164.815 | 269.9503 | 2.109674 | 3.47E-05 | 0.000818 | 1242 | - && O60071.1 RecName: Full=Uncharacterized protein C13G1.09 && PF05291:Bystin                                                                      |
| Lachesis_group0__13_contigs__l.g235   | 420.4578 | 97.63865 | 2.109061 | 0.000123 | 0.002081 | 2604 | - && Q9DE25.1 RecName: Full=Forkhead box C1-A && PF00250:Forkhead domain                                                                            |
| Lachesis_group0__13_contigs__l.g165   | 876.2315 | 203.7314 | 2.106537 | 6.59E-05 | 0.00133  | 3171 | - && O36021.1 RecName: Full=Uncharacterized protein C4F10.09c && PF03914:CBF/Mak21 family                                                           |
| Lachesis_group0__13_contigs__l.g1565  | 1946.207 | 452.3483 | 2.105398 | 2.96E-05 | 0.000731 | 1563 | - && Q9ZV56.1 RecName: Full=Choline-phosphate cytidyltransferase 1; Short=AtCCT1; AltName: Full=CTP:phosphocholine cytidyltransferase 1;            |

|                                       |          |          |          |          |          |      |                                                                                                                                                                                                                                                             |
|---------------------------------------|----------|----------|----------|----------|----------|------|-------------------------------------------------------------------------------------------------------------------------------------------------------------------------------------------------------------------------------------------------------------|
|                                       |          |          |          |          |          |      | AltName: Full=Phosphorylcholine transferase 1 && PF01467:Cytidylyltransferase-like                                                                                                                                                                          |
| Lachesis_group0__13_contigs__l.g11358 | 234.8465 | 54.90889 | 2.101269 | 0.001054 | 0.009635 | 3282 | - && O13921.2 RecName: Full=MutS protein homolog 1 && PF00488:MutS domain V PF05192:MutS domain III PF01624:MutS domain I PF05188:MutS domain II                                                                                                            |
| Lachesis_group0__13_contigs__l.g8808  | 103.4951 | 24.19433 | 2.0977   | 0.000822 | 0.008043 | 1119 | - && Q09843.1 RecName: Full=Replication factor C subunit 2; Short=Replication factor C2; AltName: Full=Activator 1 41 kDa subunit && PF08542:Replication factor C C-terminal domain PF00004:ATPase family associated with various cellular activities (AAA) |
| Lachesis_group0__13_contigs__l.g8469  | 428.9265 | 100.3831 | 2.092663 | 5.94E-06 | 0.000238 | 2790 | - && Q9Y804.1 RecName: Full=Fanconi-associated nuclease 1 homolog && PF08774:VRR-NUC domain                                                                                                                                                                 |
| Lachesis_group0__13_contigs__l.g8965  | 1263.726 | 296.875  | 2.09053  | 3.03E-05 | 0.000742 | 3585 | - && O60094.2 RecName: Full=DNA polymerase V; Short=POL V && PF04931:DNA polymerase phi                                                                                                                                                                     |
| Lachesis_group0__13_contigs__l.g6965  | 950.5941 | 223.6147 | 2.089093 | 0.000402 | 0.004791 | 3237 | - && P33520.1 RecName: Full=Cell division cycle-related protein res1/sct1; AltName: Full=p72sct1 && PF13637:Ankyrin repeats (many copies) PF13857:Ankyrin repeats (many copies)                                                                             |
| Lachesis_group0__13_contigs__l.g7800  | 69.3134  | 16.23273 | 2.087036 | 0.00161  | 0.012793 | 864  | - && - && PF06912:Protein of unknown function (DUF1275)                                                                                                                                                                                                     |
| Lachesis_group0__13_contigs__l.g5314  | 345.3183 | 81.58318 | 2.085579 | 0.000116 | 0.002    | 2082 | - && Q76PD3.1 RecName: Full=ATP-dependent RNA helicase dbp6 && PF00270:DEAD/DEAH box helicase PF00271:Helicase conserved C-terminal domain                                                                                                                  |

|                                       |          |          |          |          |          |      |                                                                                                                                                                                                                                                                           |
|---------------------------------------|----------|----------|----------|----------|----------|------|---------------------------------------------------------------------------------------------------------------------------------------------------------------------------------------------------------------------------------------------------------------------------|
| Lachesis_group0__13_contigs__l.g10436 | 223.6542 | 52.72826 | 2.085011 | 0.000146 | 0.002354 | 3405 | - && Q9C107.1 RecName: Full=Minichromosome loss protein 1; AltName: Full=DNA polymerase alpha accessory factor Mcl1 && PF12341:Minichromosome loss protein, Mcl1, middle region                                                                                           |
| Lachesis_group0__13_contigs__l.g4302  | 1745.814 | 412.2585 | 2.082674 | 8.15E-05 | 0.001568 | 3756 | - && Q12754.1 RecName: Full=Ribosomal RNA-processing protein 12 && PF08161:NUC173 domain                                                                                                                                                                                  |
| Lachesis_group0__13_contigs__l.g6658  | 1004.426 | 237.2776 | 2.082039 | 9.68E-06 | 0.000335 | 795  | - && Q1MTR2.2 RecName: Full=RNA-binding protein with serine-rich domain 1 homolog && PF00076:RNA recognition motif. (a.k.a. RRM, RBD, or RNP domain)                                                                                                                      |
| Lachesis_group0__13_contigs__l.g10868 | 4875.021 | 1151.771 | 2.08154  | 1.37E-05 | 0.000426 | 1350 | - && Q9USW3.1 RecName: Full=Probable glycosidase C21B10.07 && PF00722:Glycosyl hydrolases family 16                                                                                                                                                                       |
| Lachesis_group0__13_contigs__l.g8802  | 732.4436 | 173.4616 | 2.080051 | 9.18E-05 | 0.00171  | 993  | - && Q9Y6Z9.1 RecName: Full=Sorbose reductase sou1; AltName: Full=Sorbitol utilization protein sou1 && PF00106:short chain dehydrogenase                                                                                                                                  |
| Lachesis_group0__13_contigs__l.g1293  | 1117.363 | 264.5697 | 2.079655 | 3.25E-05 | 0.000782 | 1245 | - && Q92925.3 RecName: Full=SWI/SNF-related matrix-associated actin-dependent regulator of chromatin subfamily D member 2; AltName: Full=60 kDa BRG-1/Brm-associated factor subunit B; AltName: Full=BRG1-associated factor 60B; Short=BAF60B && PF02201:SWIB/MDM2 domain |
| Lachesis_group0__13_contigs__l.g5204  | 840.9052 | 199.522  | 2.076449 | 0.000134 | 0.002217 | 1143 | - && Q1MTN8.2 RecName: Full=Probable assembly chaperone of rpl4 && PF14559:Tetratricopeptide repeat                                                                                                                                                                       |



|                                       |          |          |          |          |          |      |                                                                                                                                                                                                                                                                                                                                |
|---------------------------------------|----------|----------|----------|----------|----------|------|--------------------------------------------------------------------------------------------------------------------------------------------------------------------------------------------------------------------------------------------------------------------------------------------------------------------------------|
| Lachesis_group0__13_contigs__l.g2040  | 144.6974 | 34.37627 | 2.075676 | 0.000706 | 0.007166 | 1035 | - && O94505.1 RecName: Full=3'(2'),5'-bisphosphate nucleotidase; AltName: Full=3'(2'),5-bisphosphonucleoside 3'(2')-phosphohydrolase; AltName: Full=DPNPase; AltName: Full=Halotolerance protein tol1; AltName: Full=Target of lithium protein 1 && PF00459:Inositol monophosphatase family                                    |
| Lachesis_group0__13_contigs__l.g10811 | 5773.553 | 1370.222 | 2.075123 | 1.03E-05 | 0.000351 | 1239 | - && P47176.1 RecName: Full=Branched-chain-amino-acid aminotransferase, cytosolic; Short=BCAT; AltName: Full=Protein TWT2 && PF01063:Amino-transferase class IV                                                                                                                                                                |
| Lachesis_group0__13_contigs__l.g4665  | 329.0092 | 77.99435 | 2.074201 | 3.24E-05 | 0.000781 | 5991 | - && Q92355.1 RecName: Full=Helicase sen1 && PF12726:SEN1 N terminal PF13087:AAA domain PF13086:AAA domain                                                                                                                                                                                                                     |
| Lachesis_group0__13_contigs__l.g9128  | 271.196  | 64.55546 | 2.073344 | 0.000876 | 0.008412 | 1182 | - && Q601X8.2 RecName: Full=Chaperone protein DnaJ && PF00226:DnaJ domain                                                                                                                                                                                                                                                      |
| Lachesis_group0__13_contigs__l.g7875  | 629.68   | 150.172  | 2.068572 | 8.39E-06 | 0.000302 | 1470 | - && Q8C2P3.1 RecName: Full=tRNA-dihydrouridine(16/17) synthase [NAD(P)(+)]-like; AltName: Full=tRNA-dihydrouridine synthase 1-like && PF01207:Dihydrouridine synthase (Dus)                                                                                                                                                   |
| Lachesis_group0__13_contigs__l.g11609 | 114.177  | 27.31943 | 2.066756 | 0.001394 | 0.011589 | 1293 | - && P0CO35.1 RecName: Full=Inositol-pentakisphosphate 2-kinase; AltName: Full=Inositol-1,3,4,5,6-pentakisphosphate 2-kinase; AltName: Full=Ins(1,3,4,5,6)P5 2-kinase; Short=InsP5 2-kinase >P0CO34.1 RecName: Full=Inositol-pentakisphosphate 2-kinase; AltName: Full=Inositol-1,3,4,5,6-pentakisphosphate 2-kinase; AltName: |

|                                      |          |          |          |          |          |      |                                                                                                                                                                                                                                                                                                                                                                                                                                                                                                                                                                                                              |
|--------------------------------------|----------|----------|----------|----------|----------|------|--------------------------------------------------------------------------------------------------------------------------------------------------------------------------------------------------------------------------------------------------------------------------------------------------------------------------------------------------------------------------------------------------------------------------------------------------------------------------------------------------------------------------------------------------------------------------------------------------------------|
|                                      |          |          |          |          |          |      | Full=Ins(1,3,4,5,6)P5 2-kinase; Short=InsP5 2-kinase<br>&& PF06090:Inositol-pentakisphosphate 2-kinase                                                                                                                                                                                                                                                                                                                                                                                                                                                                                                       |
| Lachesis_group0__13_contigs__l.g4022 | 920.786  | 220.0157 | 2.065946 | 8.07E-05 | 0.001559 | 1518 | - && - && PF02845:CUE domain                                                                                                                                                                                                                                                                                                                                                                                                                                                                                                                                                                                 |
| Lachesis_group0__13_contigs__l.g8669 | 543.9879 | 130.1503 | 2.065903 | 0.000253 | 0.003419 | 1170 | - && - && PF10332:Protein of unknown function (DUF2418)                                                                                                                                                                                                                                                                                                                                                                                                                                                                                                                                                      |
| Lachesis_group0__13_contigs__l.g9116 | 122.4487 | 29.19767 | 2.064857 | 0.002421 | 0.017292 | 936  | - && Q2KIB9.1 RecName: Full=Ribonuclease P protein subunit p29 && PF01868:Domain of unknown function UPF0086                                                                                                                                                                                                                                                                                                                                                                                                                                                                                                 |
| Lachesis_group0__13_contigs__l.g3511 | 3969.591 | 949.6661 | 2.063859 | 5.61E-05 | 0.001169 | 6525 | - && O93937.2 RecName: Full=Protein pyrABCN; Includes: RecName: Full=Glutamine-dependent carbamoyl-phosphate; Includes: RecName: Full=Aspartate carbamoyltransferase && PF00117:Glutamine amidotransferase class-I PF02787:Carbamoyl-phosphate synthetase large chain, oligomerisation domain PF00185:Aspartate/ornithine carbamoyltransferase, Asp/Orn binding domain PF02729:Aspartate/ornithine carbamoyltransferase, carbamoyl-P binding domain PF02786:Carbamoyl-phosphate synthase L chain, ATP binding domain PF02142:MGS-like domain PF00988:Carbamoyl-phosphate synthase small chain, CPSase domain |
| Lachesis_group0__13_contigs__l.g4768 | 18973.28 | 4538.546 | 2.063711 | 4.29E-06 | 0.00019  | 1335 | - && P59668.1 RecName: Full=Delta(12) fatty acid desaturase; AltName: Full=Delta-12 fatty acid desaturase && PF00487:Fatty acid desaturase                                                                                                                                                                                                                                                                                                                                                                                                                                                                   |
| Lachesis_group0__13_contigs__l.g362  | 282.0556 | 67.67681 | 2.059505 | 0.000223 | 0.003166 | 1620 | - && Q9HFE6.1 RecName: Full=Uncharacterized RNA-binding protein P16F5.06 && -                                                                                                                                                                                                                                                                                                                                                                                                                                                                                                                                |

|                                      |          |          |          |          |          |      |                                                                                                                                                                                                                    |
|--------------------------------------|----------|----------|----------|----------|----------|------|--------------------------------------------------------------------------------------------------------------------------------------------------------------------------------------------------------------------|
| Lachesis_group0__13_contigs__l.g6869 | 154.4526 | 37.32151 | 2.055345 | 0.000473 | 0.005385 | 978  | - && Q7XA87.1 RecName: Full=Folate transporter 1, chloroplastic; Short=AtFOLT1 && PF00153:Mitochondrial carrier protein                                                                                            |
| Lachesis_group0__13_contigs__l.g978  | 474.2344 | 114.2454 | 2.054856 | 4.38E-05 | 0.000986 | 948  | - && Q9UTE6.1 RecName: Full=Protein mak16 && PF01778:Ribosomal L28e protein family PF04874:Mak16 protein C-terminal region                                                                                         |
| Lachesis_group0__13_contigs__l.g6672 | 295.8226 | 71.34398 | 2.054601 | 0.000143 | 0.002314 | 1632 | - && Q3UFB2.2 RecName: Full=Box C/D snoRNA protein 1; AltName: Full=Zinc finger HIT domain-containing protein 6 && PF04438:HIT zinc finger                                                                         |
| Lachesis_group0__13_contigs__l.g3848 | 836.191  | 201.5179 | 2.053504 | 1.26E-05 | 0.000399 | 3603 | - && - && PF12937:F-box-like                                                                                                                                                                                       |
| Lachesis_group0__13_contigs__l.g5168 | 158.8586 | 38.30985 | 2.051735 | 0.000421 | 0.004933 | 1347 | - && P20397.3 RecName: Full=Nucleolin; AltName: Full=Protein C23 && PF14259:RNA recognition motif (a.k.a. RRM, RBD, or RNP domain) PF00076:RNA recognition motif. (a.k.a. RRM, RBD, or RNP domain)                 |
| Lachesis_group0__13_contigs__l.g983  | 703.1863 | 169.8307 | 2.051031 | 1.13E-05 | 0.000372 | 1497 | - && O13724.1 RecName: Full=Zinc finger protein zpr1 && PF03367:ZPR1 zinc-finger domain                                                                                                                            |
| Lachesis_group0__13_contigs__l.g8180 | 529.0597 | 127.8777 | 2.050469 | 8.84E-05 | 0.001664 | 1734 | - && O43011.2 RecName: Full=Histidine--tRNA ligase, mitochondrial; AltName: Full=Histidyl-tRNA synthetase; Short=HisRS; Flags: Precursor && PF03129:Anticodon binding domain PF13393:Histidyl-tRNA synthetase      |
| Lachesis_group0__13_contigs__l.g5723 | 2516.485 | 607.4962 | 2.050336 | 6.20E-06 | 0.000243 | 1374 | - && B3EAE0.1 RecName: Full=8-amino-7-oxononanoate synthase; Short=AONS; AltName: Full=7-keto-8-amino-pelargonic acid synthase; Short=7-KAP synthase; Short=KAPA synthase; AltName: Full=8-amino-7-ketopelargonate |

|                                       |          |          |          |          |          |      |                                                                                                                                                                                                                                                                                   |
|---------------------------------------|----------|----------|----------|----------|----------|------|-----------------------------------------------------------------------------------------------------------------------------------------------------------------------------------------------------------------------------------------------------------------------------------|
|                                       |          |          |          |          |          |      | synthase && PF00155:Aminotransferase class I and II                                                                                                                                                                                                                               |
| Lachesis_group0__13_contigs__l.g7191  | 2015.194 | 487.6358 | 2.047492 | 7.24E-05 | 0.001443 | 894  | - && Q4PI88.1 RecName: Full=Eukaryotic translation initiation factor 3 subunit F; Short=eIF3f && PF01398:JAB1/Mov34/MPN/PAD-1 ubiquitin protease PF13012:Maintenance of mitochondrial structure and function                                                                      |
| Lachesis_group0__13_contigs__l.g5290  | 3152.928 | 763.035  | 2.04696  | 1.75E-05 | 0.000516 | 2961 | - && Q01371.2 RecName: Full=White collar 1 protein; Short=WC1 && PF00320:GATA zinc finger                                                                                                                                                                                         |
| Lachesis_group0__13_contigs__l.g1956  | 627.5514 | 151.9528 | 2.046385 | 2.85E-05 | 0.000713 | 1587 | - && Q7ZWS5.1 RecName: Full=Sorting and assembly machinery component 50 homolog A && PF01103:Surface antigen                                                                                                                                                                      |
| Lachesis_group0__13_contigs__l.g10875 | 719.6512 | 174.3431 | 2.045682 | 4.84E-05 | 0.001045 | 1773 | - && Q75AE1.1 RecName: Full=ATP-dependent RNA helicase ROK1 && PF00270:DEAD/DEAH box helicase PF00271:Helicase conserved C-terminal domain                                                                                                                                        |
| Lachesis_group0__13_contigs__l.g1191  | 207.1723 | 50.25725 | 2.044785 | 0.000234 | 0.003247 | 1887 | - && - && PF12937:F-box-like                                                                                                                                                                                                                                                      |
| Lachesis_group0__13_contigs__l.g1731  | 2473.765 | 599.6254 | 2.044263 | 7.69E-05 | 0.001499 | 2442 | - && O88833.2 RecName: Full=Cytochrome P450 4A10; AltName: Full=CYP1A10; AltName: Full=Cytochrome P450-LA-omega 1; AltName: Full=Cytochrome P452; AltName: Full=Lauric acid omega-hydroxylase; AltName: Full=Long-chain fatty acid omega-monooxygenase && PF00067:Cytochrome P450 |
| Lachesis_group0__13_contigs__l.g1459  | 84.54798 | 20.5428  | 2.041128 | 0.001433 | 0.011803 | 1134 | - && O94564.1 RecName: Full=Zinc-type alcohol dehydrogenase-like protein C1773.06c && PF08240:Alcohol dehydrogenase GroES-like domain PF00107:Zinc-binding dehydrogenase                                                                                                          |

|                                       |          |          |          |          |          |      |                                                                                                                                                                                                                                                                                                                                                         |
|---------------------------------------|----------|----------|----------|----------|----------|------|---------------------------------------------------------------------------------------------------------------------------------------------------------------------------------------------------------------------------------------------------------------------------------------------------------------------------------------------------------|
| Lachesis_group0__13_contigs__l.g7347  | 452.4862 | 110.0076 | 2.040023 | 0.000251 | 0.003402 | 957  | - && Q96B26.1 RecName: Full=Exosome complex component RRP43; AltName: Full=Exosome component 8; AltName: Full=Opa-interacting protein 2; Short=OIP-2; AltName: Full=Ribosomal RNA-processing protein 43; AltName: Full=p9 && PF03725:3' exoribonuclease family, domain 2 PF01138:3' exoribonuclease family, domain 1                                    |
| Lachesis_group0__13_contigs__l.g11030 | 106.1756 | 25.99735 | 2.039266 | 0.000936 | 0.008827 | 1248 | - && Q9CX47.1 RecName: Full=DNA repair protein XRCC2; AltName: Full=X-ray repair cross-complementing protein 2 && -                                                                                                                                                                                                                                     |
| Lachesis_group0__13_contigs__l.g3351  | 432.0371 | 105.3228 | 2.039135 | 0.000314 | 0.003984 | 1011 | - && Q10205.1 RecName: Full=Exosome complex component rrp43; AltName: Full=Ribosomal RNA-processing protein 43 && PF01138:3' exoribonuclease family, domain 1                                                                                                                                                                                           |
| Lachesis_group0__13_contigs__l.g8999  | 109.8097 | 26.71458 | 2.038051 | 0.00093  | 0.008794 | 2754 | - && Q6NU40.1 RecName: Full=Chromosome transmission fidelity protein 18 homolog && PF00004:ATPase family associated with various cellular activities (AAA)                                                                                                                                                                                              |
| Lachesis_group0__13_contigs__l.g8137  | 342.6569 | 83.4558  | 2.03803  | 4.41E-05 | 0.000989 | 1389 | - && P0CS07.1 RecName: Full=tRNA (adenine(58)-N(1))-methyltransferase non-catalytic subunit TRM6; AltName: Full=tRNA(m1A58)-methyltransferase subunit TRM6; Short=tRNA(m1A58)MTase subunit TRM6 >P0CS06.1 RecName: Full=tRNA (adenine(58)-N(1))-methyltransferase non-catalytic subunit TRM6; AltName: Full=tRNA(m1A58)-methyltransferase subunit TRM6; |

|                                       |          |          |          |          |          |      |                                                                                                                                                                                                                                                                                     |
|---------------------------------------|----------|----------|----------|----------|----------|------|-------------------------------------------------------------------------------------------------------------------------------------------------------------------------------------------------------------------------------------------------------------------------------------|
|                                       |          |          |          |          |          |      | Short=tRNA(m1A58)MTase subunit TRM6 && PF04189:Gcd10p family                                                                                                                                                                                                                        |
| Lachesis_group0__13_contigs__l.g1721  | 1141.268 | 279.4801 | 2.030079 | 0.000162 | 0.002523 | 1092 | - && C3K630.1 RecName: Full=L-amino acid amidase && PF12697:Alpha/beta hydrolase family                                                                                                                                                                                             |
| Lachesis_group0__13_contigs__l.g9187  | 1158.631 | 285.1021 | 2.023781 | 0.000107 | 0.001905 | 528  | - && Q759D1.1 RecName: Full=Ribosome biogenesis protein RLP24 && PF01246:Ribosomal protein L24e                                                                                                                                                                                     |
| Lachesis_group0__13_contigs__l.g4161  | 965.1519 | 237.5286 | 2.023666 | 5.98E-05 | 0.001231 | 1437 | - && Q4P4G8.1 RecName: Full=NKAP family protein UM04995 && PF06047:Ras-induced vulval development antagonist                                                                                                                                                                        |
| Lachesis_group0__13_contigs__l.g11308 | 408.7138 | 100.5977 | 2.022542 | 3.46E-05 | 0.000816 | 903  | - && B8PL20.1 RecName: Full=Maintenance of mitochondrial morphology protein 1 && PF10296:Maintenance of mitochondrial morphology protein 1                                                                                                                                          |
| Lachesis_group0__13_contigs__l.g9167  | 600.6376 | 148.2347 | 2.0196   | 0.000239 | 0.003289 | 732  | - && Q9CY21.1 RecName: Full=Probable 18S rRNA (guanine-N(7))-methyltransferase; AltName: Full=Bud site selection protein 23 homolog; AltName: Full=Williams-Beuren syndrome chromosomal region 22 protein homolog && PF12589:Methyltransferase involved in Williams-Beuren syndrome |
| Lachesis_group0__13_contigs__l.g6932  | 51.13244 | 12.72654 | 2.018929 | 0.004313 | 0.026026 | 1344 | - && - && PF07699:GCC2 and GCC3                                                                                                                                                                                                                                                     |
| Lachesis_group0__13_contigs__l.g9135  | 131.7357 | 32.44596 | 2.016812 | 0.001397 | 0.011602 | 825  | - && B4NBL6.1 RecName: Full=Protein phosphatase PTC7 homolog fig; AltName: Full=Fos intronic gene protein && PF07228:Stage II sporulation protein E (SpoIIE)                                                                                                                        |
| Lachesis_group0__13_contigs__l.g3350  | 513.7788 | 127.1553 | 2.015498 | 0.000118 | 0.002029 | 666  | - && O94285.1 RecName: Full=DNA-directed RNA polymerase III subunit rpc8; Short=RNA                                                                                                                                                                                                 |

|                                       |          |          |          |          |          |      |                                                                                                                                                                                                                                  |
|---------------------------------------|----------|----------|----------|----------|----------|------|----------------------------------------------------------------------------------------------------------------------------------------------------------------------------------------------------------------------------------|
|                                       |          |          |          |          |          |      | polymerase III subunit C8; AltName: Full=RNA polymerase III subunit C25 && PF03876:SHS2 domain found in N terminus of Rpb7p/Rpc25p/MJ0397 PF08292:RNA polymerase III subunit Rpc25                                               |
| Lachesis_group0__13_contigs__l.g8445  | 455.4487 | 112.826  | 2.015397 | 0.000112 | 0.001957 | 1857 | - && - && PF12937:F-box-like                                                                                                                                                                                                     |
| Lachesis_group0__13_contigs__l.g5505  | 411.6273 | 102.2683 | 2.010562 | 7.29E-05 | 0.001446 | 2007 | - && A7EZIP8.1 RecName: Full=U3 small nucleolar RNA-associated protein 25; Short=U3 snoRNA-associated protein 25; AltName: Full=U three protein 25 && PF06862:Utp25, U3 small nucleolar RNA-associated SSU processome protein 25 |
| Lachesis_group0__13_contigs__l.g5708  | 618.1106 | 153.6837 | 2.010399 | 0.000422 | 0.00494  | 2418 | - && O14325.1 RecName: Full=Uncharacterized AAA domain-containing protein C16E9.10c && PF00004:ATPase family associated with various cellular activities (AAA)                                                                   |
| Lachesis_group0__13_contigs__l.g11345 | 3269.464 | 812.7833 | 2.008445 | 0.000109 | 0.001925 | 1173 | - && P38997.1 RecName: Full=Saccharopine dehydrogenase [NAD(+), L-lysine-forming]; Short=SDH; AltName: Full=Lysine--2-oxoglutarate reductase && PF05222:Alanine dehydrogenase/PNT, N-terminal domain                             |
| Lachesis_group0__13_contigs__l.g11312 | 159.9948 | 39.69047 | 2.00729  | 0.000139 | 0.002276 | 471  | - && Q92346.2 RecName: Full=Uncharacterized protein C6G9.01c && PF08576:Eukaryotic protein of unknown function (DUF1764)                                                                                                         |
| Lachesis_group0__13_contigs__l.g7164  | 211.2959 | 52.72102 | 2.004344 | 0.000556 | 0.006033 | 1656 | - && Q8R1Q8.1 RecName: Full=Cytoplasmic dynein 1 light intermediate chain 1; AltName: Full=Dynein light chain A; Short=DLC-A; AltName: Full=Dynein light intermediate chain 1, cytosolic                                         |

|                                      |          |          |          |          |          |      |                                                                                                                                                                                                                                                                                           |
|--------------------------------------|----------|----------|----------|----------|----------|------|-------------------------------------------------------------------------------------------------------------------------------------------------------------------------------------------------------------------------------------------------------------------------------------------|
|                                      |          |          |          |          |          |      | && PF05783:Dynein light intermediate chain (DLIC)                                                                                                                                                                                                                                         |
| Lachesis_group0__13_contigs__l.g4773 | 820.6118 | 204.7597 | 2.004319 | 0.00023  | 0.003207 | 1614 | - && Q9ZWB3.1 RecName: Full=Casein kinase 1-like protein 9; AltName: Full=Dual specificity kinase 1; AltName: Full=Protein CASEIN KINASE I-LIKE 9; AltName: Full=Protein CASEIN KINASE I-LIKE 9 ALPHA; AltName: Full=Protein CASEIN KINASE I-LIKE 9 BETA && PF00069:Protein kinase domain |
| Lachesis_group0__13_contigs__l.g5532 | 1370.411 | 342.0641 | 2.002762 | 1.91E-05 | 0.000549 | 2313 | - && P0CQ91.1 RecName: Full=ATP-dependent RNA helicase MAK5 && PF00270:DEAD/DEAH box helicase PF00271:Helicase conserved C-terminal domain                                                                                                                                                |
| Lachesis_group0__13_contigs__l.g7690 | 556.256  | 138.998  | 2.001905 | 0.000105 | 0.001883 | 1392 | - && Q4P553.2 RecName: Full=Histone acetyltransferase type B subunit 2 && PF12265:Histone-binding protein RBBP4 or subunit C of CAF1 complex                                                                                                                                              |
| Lachesis_group0__13_contigs__l.g4177 | 254.1168 | 63.53066 | 2.00127  | 6.74E-05 | 0.001355 | 1722 | - && B7F9G7.1 RecName: Full=Heptahelical transmembrane protein ADIPOR1; AltName: Full=PAQR family protein ADIPOR1 && PF03006:Haemolysin-III related                                                                                                                                       |
| Lachesis_group0__13_contigs__l.g6036 | 475.0291 | 119.1283 | 1.995778 | 7.55E-06 | 0.000285 | 3510 | - && P28706.2 RecName: Full=DNA repair protein rad13 && PF00752:XPG N-terminal domain PF00867:XPG I-region                                                                                                                                                                                |
| Lachesis_group0__13_contigs__l.g6892 | 2940.923 | 738.4431 | 1.994151 | 0.000167 | 0.002563 | 2034 | - && P40010.1 RecName: Full=Nuclear GTP-binding protein NUG1; AltName: Full=Nuclear GTPase 1 && PF01926:50S ribosome-binding GTPase PF08701:GNL3L/Grn1 putative GTPase                                                                                                                    |



|                                       |          |          |          |          |          |      |                                                                                                                                                                                                                                                                                                                 |
|---------------------------------------|----------|----------|----------|----------|----------|------|-----------------------------------------------------------------------------------------------------------------------------------------------------------------------------------------------------------------------------------------------------------------------------------------------------------------|
| Lachesis_group0__13_contigs__l.g4266  | 1490.213 | 375.132  | 1.99083  | 9.58E-05 | 0.001759 | 2304 | - && Q9USL4.2 RecName: Full=Nucleoporin nup61; AltName: Full=Nuclear pore protein nup61 && PF00638:RanBP1 domain PF08911:NUP50 (Nucleoporin 50 kDa)                                                                                                                                                             |
| Lachesis_group0__13_contigs__l.g11566 | 514.6342 | 129.5567 | 1.990326 | 0.00086  | 0.008306 | 1155 | - && P53871.1 RecName: Full=Probable glutamine amidotransferase DUG3; AltName: Full=Deficient in utilization of glutathione protein 3; AltName: Full=GSH degradosomal complex subunit DUG3 && PF13230:Glutamine amidotransferases class-II                                                                      |
| Lachesis_group0__13_contigs__l.g6517  | 527.4825 | 132.838  | 1.988908 | 0.000732 | 0.00736  | 540  | - && Q6MVL2.1 RecName: Full=Deoxyuridine 5'-triphosphate nucleotidohydrolase; Short=dUTPase; AltName: Full=dUTP pyrophosphatase && PF00692:dUTPase                                                                                                                                                              |
| Lachesis_group0__13_contigs__l.g2759  | 1943.321 | 490.9477 | 1.98509  | 1.55E-05 | 0.000475 | 966  | - && Q9UUI8.1 RecName: Full=Uncharacterized transporter C22F8.04 && PF03151:Triose-phosphate Transporter family                                                                                                                                                                                                 |
| Lachesis_group0__13_contigs__l.g2089  | 750.0039 | 189.7177 | 1.98369  | 0.000131 | 0.002182 | 570  | - && B0D4L0.1 RecName: Full=Signal peptidase complex catalytic subunit SEC11; AltName: Full=Signal peptidase I && PF00717:Peptidase S24-like                                                                                                                                                                    |
| Lachesis_group0__13_contigs__l.g6008  | 51.0997  | 12.90826 | 1.979825 | 0.003387 | 0.021894 | 633  | - && - && PF01185:Fungal hydrophobin                                                                                                                                                                                                                                                                            |
| Lachesis_group0__13_contigs__l.g5385  | 531.8056 | 135.1487 | 1.977598 | 0.000285 | 0.003755 | 2628 | - && P52948.4 RecName: Full=Nuclear pore complex protein Nup98-Nup96; Contains: RecName: Full=Nuclear pore complex protein Nup98; AltName: Full=98 kDa nucleoporin; AltName: Full=Nucleoporin Nup98; Short=Nup98; Contains: RecName: Full=Nuclear pore complex protein Nup96; AltName: Full=96 kDa nucleoporin; |

|                                      |          |          |          |          |          |      |                                                                                                                                                                                                                                                                                                        |
|--------------------------------------|----------|----------|----------|----------|----------|------|--------------------------------------------------------------------------------------------------------------------------------------------------------------------------------------------------------------------------------------------------------------------------------------------------------|
|                                      |          |          |          |          |          |      | AltName: Full=Nucleoporin Nup96; Short=Nup96;<br>Flags: Precursor && PF12110:Nuclear protein 96                                                                                                                                                                                                        |
| Lachesis_group0__13_contigs__l.g8029 | 18649.12 | 4757.6   | 1.970845 | 0.0001   | 0.001812 | 375  | - && P29429.2 RecName: Full=Thioredoxin;<br>Short=Trx && PF00085:Thioredoxin                                                                                                                                                                                                                           |
| Lachesis_group0__13_contigs__l.g3003 | 468.4316 | 119.6174 | 1.970409 | 0.000253 | 0.003419 | 4332 | - && O13816.3 RecName: Full=Cohesin subunit<br>psc3; AltName: Full=SCC3 homolog &&<br>PF08514:STAG domain                                                                                                                                                                                              |
| Lachesis_group0__13_contigs__l.g4900 | 946.9913 | 242.0298 | 1.968944 | 4.64E-05 | 0.001016 | 1722 | - && Q9P775.1 RecName: Full=Uncharacterized<br>WD repeat-containing protein C17D11.16 && -                                                                                                                                                                                                             |
| Lachesis_group0__13_contigs__l.g3442 | 2175.61  | 556.378  | 1.967666 | 2.72E-05 | 0.000692 | 2256 | - && O42945.1 RecName: Full=Probable pre-<br>mRNA-splicing factor ATP-dependent RNA<br>helicase prp43 &&<br>PF07717:Oligonucleotide/oligosaccharide-binding<br>(OB)-fold PF00271:Helicase conserved C-terminal<br>domain PF00270:DEAD/DEAH box<br>helicase PF04408:Helicase associated domain<br>(HA2) |
| Lachesis_group0__13_contigs__l.g6430 | 1534.548 | 392.6081 | 1.966097 | 0.000148 | 0.002374 | 2172 | - && O43000.2 RecName: Full=Pantothenate<br>transporter liz1 && -                                                                                                                                                                                                                                      |
| Lachesis_group0__13_contigs__l.g3400 | 633.7788 | 162.4181 | 1.963891 | 4.06E-05 | 0.000929 | 1140 | - && Q6FM05.1 RecName: Full=37S ribosomal<br>protein S10, mitochondrial; AltName:<br>Full=Mitochondrial ribosomal small subunit<br>protein 10; Flags: Precursor && PF00338:Ribosomal<br>protein S10p/S20e                                                                                              |
| Lachesis_group0__13_contigs__l.g3885 | 2387.435 | 612.0461 | 1.963789 | 0.000231 | 0.003211 | 1755 | - && Q9UUE6.1 RecName: Full=Lysine--tRNA<br>ligase, cytoplasmic; AltName: Full=Lysyl-tRNA<br>synthetase; Short=LysRS && PF01336:OB-fold                                                                                                                                                                |

|                                      |          |          |          |          |          |      |                                                                                                                                                                                                                                                                                                          |
|--------------------------------------|----------|----------|----------|----------|----------|------|----------------------------------------------------------------------------------------------------------------------------------------------------------------------------------------------------------------------------------------------------------------------------------------------------------|
|                                      |          |          |          |          |          |      | nucleic acid binding domain PF00152:tRNA synthetases class II (D, K and N)                                                                                                                                                                                                                               |
| Lachesis_group0__13_contigs__l.g778  | 188.9749 | 48.65531 | 1.958877 | 7.44E-05 | 0.001463 | 1626 | - && - && PF02636:Putative S-adenosyl-L-methionine-dependent methyltransferase                                                                                                                                                                                                                           |
| Lachesis_group0__13_contigs__l.g375  | 891.3307 | 229.4924 | 1.957647 | 0.000237 | 0.00327  | 1593 | - && Q7ZXK9.1 RecName: Full=Notchless protein homolog 1 && PF08154:NLE (NUC135) domain PF00400:WD domain, G-beta repeat                                                                                                                                                                                  |
| Lachesis_group0__13_contigs__l.g1360 | 3499.031 | 901.8792 | 1.956329 | 7.68E-05 | 0.001499 | 1701 | - && P87058.1 RecName: Full=La protein homolog; AltName: Full=La autoantigen homolog; AltName: Full=La ribonucleoprotein && PF05383:La domain PF00076:RNA recognition motif. (a.k.a. RRM, RBD, or RNP domain)                                                                                            |
| Lachesis_group0__13_contigs__l.g4098 | 3204.84  | 826.7561 | 1.954924 | 0.00176  | 0.013724 | 1161 | - && Q7SDV9.1 RecName: Full=Cytochrome c peroxidase, mitochondrial; Short=CCP; Flags: Precursor && PF00141:Peroxidase                                                                                                                                                                                    |
| Lachesis_group0__13_contigs__l.g270  | 9776.803 | 2524.562 | 1.95343  | 0.0013   | 0.011073 | 3219 | - && Q4WY82.2 RecName: Full=Linoleate 10R-lipoxygenase; AltName: Full=Cyclooxygenase-like fatty acid oxygenase; AltName: Full=Fatty acid oxygenase ppoC; AltName: Full=Linoleate 10R-dioxygenase; Short=10R-DOX; AltName: Full=Psi-producing oxygenase C; Short=AfPpoC && PF03098:Animal haem peroxidase |
| Lachesis_group0__13_contigs__l.g365  | 565.2541 | 146.2815 | 1.950275 | 2.30E-05 | 0.000615 | 1506 | - && Q6TNS2.1 RecName: Full=p21-activated protein kinase-interacting protein 1-like; AltName: Full=PAK1-interacting protein 1-like && PF00400:WD domain, G-beta repeat                                                                                                                                   |

|                                      |          |          |          |          |          |      |                                                                                                                                                                                                                                           |
|--------------------------------------|----------|----------|----------|----------|----------|------|-------------------------------------------------------------------------------------------------------------------------------------------------------------------------------------------------------------------------------------------|
| Lachesis_group0__13_contigs__l.g9571 | 15388.41 | 3987.383 | 1.94829  | 0.0002   | 0.002924 | 1854 | - && - && PF04082:Fungal specific transcription factor domain PF00172:Fungal Zn(2)-Cys(6) binuclear cluster domain                                                                                                                        |
| Lachesis_group0__13_contigs__l.g1479 | 195.8971 | 50.83032 | 1.948192 | 0.000809 | 0.007933 | 1263 | - && O94725.1 RecName: Full=Protein-glutamate O-methyltransferase C1393.13 && PF01937:Protein of unknown function DUF89                                                                                                                   |
| Lachesis_group0__13_contigs__l.g8058 | 1912.325 | 496.7711 | 1.945251 | 0.000411 | 0.004847 | 2850 | - && Q5U2W5.1 RecName: Full=Transducin beta-like protein 3 && PF08625:Utp13 specific WD40 associated domain                                                                                                                               |
| Lachesis_group0__13_contigs__l.g7479 | 392.9171 | 101.9844 | 1.943712 | 0.001525 | 0.012345 | 1509 | - && - && PF02205:WH2 motif                                                                                                                                                                                                               |
| Lachesis_group0__13_contigs__l.g1506 | 342.5267 | 89.32237 | 1.943253 | 0.000908 | 0.008631 | 1632 | - && Q9BZE2.3 RecName: Full=tRNA pseudouridine(38/39) synthase; AltName: Full=tRNA pseudouridine synthase 3; AltName: Full=tRNA pseudouridylate synthase 3; AltName: Full=tRNA-uridine isomerase 3 && PF01416:tRNA pseudouridine synthase |
| Lachesis_group0__13_contigs__l.g4004 | 5082.865 | 1322.177 | 1.942696 | 3.41E-06 | 0.000158 | 663  | - && O94255.2 RecName: Full=Carbonic anhydrase; AltName: Full=Carbonate dehydratase && PF00484:Carbonic anhydrase                                                                                                                         |
| Lachesis_group0__13_contigs__l.g6666 | 252.1063 | 65.51442 | 1.942517 | 0.000858 | 0.008295 | 1092 | - && Q6FLQ5.1 RecName: Full=Altered inheritance of mitochondria protein 32 && PF06999:Sucrase/ferredoxin-like                                                                                                                             |
| Lachesis_group0__13_contigs__l.g1537 | 436.0405 | 113.5463 | 1.940364 | 0.000106 | 0.001894 | 2820 | - && Q17RS7.2 RecName: Full=Flap endonuclease GEN homolog 1 && PF00867:XPG I-region                                                                                                                                                       |
| Lachesis_group0__13_contigs__l.g3894 | 7989.432 | 2087.018 | 1.936782 | 9.62E-05 | 0.001763 | 2352 | - && O59838.2 RecName: Full=Heat shock protein homolog pss1 && PF00012:Hsp70 protein PF10712:NAD-specific glutamate dehydrogenase                                                                                                         |

|                                      |          |          |          |          |          |      |                                                                                                                                                                                                                                                                      |
|--------------------------------------|----------|----------|----------|----------|----------|------|----------------------------------------------------------------------------------------------------------------------------------------------------------------------------------------------------------------------------------------------------------------------|
| Lachesis_group0__13_contigs__l.g2705 | 3147.424 | 823.6473 | 1.934316 | 0.000225 | 0.003166 | 1137 | - && Q8K0C9.1 RecName: Full=GDP-mannose 4,6 dehydratase; AltName: Full=GDP-D-mannose dehydratase; Short=GMD && PF16363:GDP-mannose 4,6 dehydratase                                                                                                                   |
| Lachesis_group0__13_contigs__l.g9220 | 373.7996 | 97.93983 | 1.934122 | 0.000115 | 0.002    | 2082 | - && Q03188.2 RecName: Full=Centromere protein C; Short=CENP-C; AltName: Full=Centromere autoantigen C; AltName: Full=Centromere protein C 1; Short=CENP-C 1; AltName: Full=Interphase centromere complex protein 7 && PF11699:Mif2/CENP-C like                      |
| Lachesis_group0__13_contigs__l.g8419 | 58.49357 | 15.37037 | 1.933434 | 0.009219 | 0.044634 | 363  | - && P0CM85.1 RecName: Full=Cytochrome c oxidase assembly protein COX16, mitochondrial; Flags: Precursor >P0CM84.1 RecName: Full=Cytochrome c oxidase assembly protein COX16, mitochondrial; Flags: Precursor && PF14138:Cytochrome c oxidase assembly protein COX16 |
| Lachesis_group0__13_contigs__l.g4588 | 1199.962 | 314.3711 | 1.93241  | 9.55E-05 | 0.001758 | 2169 | - && Q03319.2 RecName: Full=Probable ATP-dependent RNA helicase prh1 && PF00270:DEAD/DEAH box helicase PF07717:Oligonucleotide/oligosaccharide-binding (OB)-fold PF04408:Helicase associated domain (HA2) PF00271:Helicase conserved C-terminal domain               |
| Lachesis_group0__13_contigs__l.g7158 | 1960.626 | 514.0794 | 1.931861 | 0.000241 | 0.003296 | 1272 | - && Q4PEV8.1 RecName: Full=Eukaryotic translation initiation factor 3 subunit M; Short=eIF3m && PF01399:PCI domain                                                                                                                                                  |

|                                       |          |          |          |          |          |      |                                                                                                                                                                                                                                                                                                                                                                                                       |
|---------------------------------------|----------|----------|----------|----------|----------|------|-------------------------------------------------------------------------------------------------------------------------------------------------------------------------------------------------------------------------------------------------------------------------------------------------------------------------------------------------------------------------------------------------------|
| Lachesis_group0__13_contigs__l.g3724  | 677.3961 | 177.6688 | 1.930742 | 2.40E-05 | 0.000636 | 1962 | - && - && PF03235:Protein of unknown function DUF262                                                                                                                                                                                                                                                                                                                                                  |
| Lachesis_group0__13_contigs__l.g10350 | 168.6426 | 44.2514  | 1.929886 | 0.000222 | 0.003164 | 2184 | - && - && PF12348:CLASP N terminal                                                                                                                                                                                                                                                                                                                                                                    |
| Lachesis_group0__13_contigs__l.g9548  | 2128.42  | 558.6214 | 1.929319 | 0.000176 | 0.002648 | 990  | - && Q5XGI0.1 RecName: Full=Ribose-phosphate pyrophosphokinase 2; AltName: Full=Phosphoribosyl pyrophosphate synthase II; Short=PRS-II && PF14572:Phosphoribosyl synthetase-associated domain PF13793:N-terminal domain of ribose phosphate pyrophosphokinase                                                                                                                                         |
| Lachesis_group0__13_contigs__l.g2646  | 1021.554 | 268.6908 | 1.926584 | 0.000784 | 0.007729 | 2985 | - && O13671.2 RecName: Full=Importin-alpha re-exporter; AltName: Full=Cellular apoptosis susceptibility protein homolog && PF03378:CAS/CSE protein, C-terminus PF08506:Cse1 PF03810:Importin-beta N-terminal domain                                                                                                                                                                                   |
| Lachesis_group0__13_contigs__l.g8421  | 152.4151 | 40.22344 | 1.925738 | 0.001475 | 0.012077 | 1836 | - && - && PF12937:F-box-like                                                                                                                                                                                                                                                                                                                                                                          |
| Lachesis_group0__13_contigs__l.g4167  | 130.7256 | 34.41881 | 1.925355 | 0.001154 | 0.01017  | 567  | - && C1A349.1 RecName: Full=Peptidyl-tRNA hydrolase; Short=PTH && PF01195:Peptidyl-tRNA hydrolase                                                                                                                                                                                                                                                                                                     |
| Lachesis_group0__13_contigs__l.g6809  | 2197.367 | 579.2583 | 1.924124 | 0.000167 | 0.00256  | 5298 | - && P15398.2 RecName: Full=DNA-directed RNA polymerase I subunit rpa1; AltName: Full=DNA-directed RNA polymerase I 190 kDa polypeptide; AltName: Full=DNA-directed RNA polymerase I largest subunit && PF04998:RNA polymerase Rpb1, domain 5 PF04983:RNA polymerase Rpb1, domain 3 PF04997:RNA polymerase Rpb1, domain 1 PF00623:RNA polymerase Rpb1, domain 2 PF05000:RNA polymerase Rpb1, domain 4 |

|                                       |          |          |          |          |          |      |                                                                                                                                                                                                                                  |
|---------------------------------------|----------|----------|----------|----------|----------|------|----------------------------------------------------------------------------------------------------------------------------------------------------------------------------------------------------------------------------------|
| Lachesis_group0__13_contigs__l.g7689  | 207.5478 | 54.6353  | 1.92367  | 0.000598 | 0.006327 | 954  | - && O94480.1 RecName: Full=25S rRNA (uridine-N(3))-methyltransferase && PF10354:Domain of unknown function (DUF2431)                                                                                                            |
| Lachesis_group0__13_contigs__l.g9910  | 4115.25  | 1085.478 | 1.922634 | 7.69E-06 | 0.000286 | 1863 | - && - && PF04577:Protein of unknown function (DUF563)                                                                                                                                                                           |
| Lachesis_group0__13_contigs__l.g11458 | 644.4433 | 170.3272 | 1.921373 | 0.001165 | 0.010252 | 2301 | - && P41389.2 RecName: Full=DNA replication licensing factor mcm5; AltName: Full=Cell division control protein nda4; AltName: Full=Minichromosome maintenance protein 5 && PF14551:MCM N-terminal domain PF00493:MCM2/3/5 family |
| Lachesis_group0__13_contigs__l.g6106  | 1378.221 | 364.0166 | 1.921059 | 0.00016  | 0.002503 | 741  | - && P33281.1 RecName: Full=C-8 sterol isomerase; AltName: Full=Delta-8--delta-7 sterol isomerase && PF04622:ERG2 and Sigma1 receptor like protein                                                                               |
| Lachesis_group0__13_contigs__l.g5996  | 1183.603 | 312.6466 | 1.920936 | 0.000117 | 0.002006 | 1068 | - && O74978.1 RecName: Full=Uncharacterized RNA-binding protein C1827.05c && PF00076:RNA recognition motif. (a.k.a. RRM, RBD, or RNP domain)                                                                                     |
| Lachesis_group0__13_contigs__l.g1508  | 1349.056 | 356.7121 | 1.920243 | 0.000375 | 0.004552 | 2034 | - && Q3SYU1.1 RecName: Full=Nucleolar complex protein 2 homolog; Short=Protein NOC2 homolog; AltName: Full=NOC2-like protein; AltName: Full=Novel INHAT repressor && PF03715:Noc2p family                                        |
| Lachesis_group0__13_contigs__l.g2817  | 46.82519 | 12.40414 | 1.919434 | 0.004615 | 0.0273   | 2400 | - && - && PF04082:Fungal specific transcription factor domain                                                                                                                                                                    |
| Lachesis_group0__13_contigs__l.g7163  | 872.797  | 231.2386 | 1.916798 | 0.000247 | 0.003347 | 1977 | - && Q2KIH4.1 RecName: Full=Ribosome biogenesis regulatory protein homolog &&                                                                                                                                                    |

|                                       |          |          |          |          |          |      |                                                                                                                                                                                         |
|---------------------------------------|----------|----------|----------|----------|----------|------|-----------------------------------------------------------------------------------------------------------------------------------------------------------------------------------------|
|                                       |          |          |          |          |          |      | PF04176:TIP41-like family PF04939:Ribosome biogenesis regulatory protein (RRS1)                                                                                                         |
| Lachesis_group0__13_contigs__l.g6033  | 2418.465 | 641.1302 | 1.915674 | 2.54E-05 | 0.000668 | 1203 | - && Q6AYD3.1 RecName: Full=Proliferation-associated protein 2G4 && PF00557:Metallopeptidase family M24                                                                                 |
| Lachesis_group0__13_contigs__l.g11400 | 1565.495 | 415.0967 | 1.915616 | 0.0001   | 0.001813 | 1701 | - && Q4P6N0.2 RecName: Full=ATP-dependent RNA helicase HAS1 && PF13959:Domain of unknown function (DUF4217) PF00270:DEAD/DEAH box helicase PF00271:Helicase conserved C-terminal domain |
| Lachesis_group0__13_contigs__l.g2180  | 1296.785 | 344.0339 | 1.915415 | 0.001536 | 0.012385 | 1635 | - && O74341.1 RecName: Full=T-complex protein 1 subunit gamma; Short=TCP-1-gamma; AltName: Full=CCT-gamma && PF00118:TCP-1/cpn60 chaperonin family                                      |
| Lachesis_group0__13_contigs__l.g10819 | 134.9394 | 35.7028  | 1.914726 | 0.001202 | 0.010456 | 1578 | - && A8MLB5.1 RecName: Full=Glutamate--tRNA ligase; AltName: Full=Glutamyl-tRNA synthetase; Short=GluRS && PF00749:tRNA synthetases class I (E and Q), catalytic domain                 |
| Lachesis_group0__13_contigs__l.g7775  | 1132.005 | 300.3404 | 1.914199 | 0.001046 | 0.009583 | 1590 | - && Q1JQD2.1 RecName: Full=Glutamate-rich WD repeat-containing protein 1 && PF12265:Histone-binding protein RBBP4 or subunit C of CAF1 complex                                         |
| Lachesis_group0__13_contigs__l.g2412  | 1251.239 | 332.6954 | 1.911107 | 1.03E-05 | 0.00035  | 1833 | - && P10815.1 RecName: Full=G2/mitotic-specific cyclin cdc13 && PF02984:Cyclin, C-terminal domain PF00134:Cyclin, N-terminal domain                                                     |



|                                      |          |          |          |          |          |      |                                                                                                                                                                                                                                  |
|--------------------------------------|----------|----------|----------|----------|----------|------|----------------------------------------------------------------------------------------------------------------------------------------------------------------------------------------------------------------------------------|
| Lachesis_group0__13_contigs__l.g662  | 1028.211 | 273.612  | 1.910126 | 5.55E-05 | 0.001163 | 2802 | - && P38127.1 RecName: Full=Mitochondrial carrier protein RIM2 && PF12937:F-box-like PF00153:Mitochondrial carrier protein                                                                                                       |
| Lachesis_group0__13_contigs__l.g1359 | 5742.069 | 1528.128 | 1.909958 | 0.001381 | 0.011516 | 2835 | - && - && PF04082:Fungal specific transcription factor domain                                                                                                                                                                    |
| Lachesis_group0__13_contigs__l.g178  | 320.3064 | 85.25988 | 1.909592 | 0.002288 | 0.01659  | 2280 | - && P28739.3 RecName: Full=Kinesin-like protein klpA && PF00225:Kinesin motor domain                                                                                                                                            |
| Lachesis_group0__13_contigs__l.g6623 | 295.5461 | 78.59065 | 1.908678 | 0.000165 | 0.002539 | 1038 | - && - && PF10180:Uncharacterised conserved protein (DUF2373)                                                                                                                                                                    |
| Lachesis_group0__13_contigs__l.g8805 | 572.9554 | 152.8091 | 1.906999 | 4.31E-05 | 0.000975 | 912  | - && O13970.2 RecName: Full=37S ribosomal protein mrp4, mitochondrial; Flags: Precursor && PF00318:Ribosomal protein S2                                                                                                          |
| Lachesis_group0__13_contigs__l.g7195 | 966.5949 | 258.0285 | 1.906264 | 0.001442 | 0.011839 | 2949 | - && P49731.2 RecName: Full=DNA replication licensing factor mcm6; AltName: Full=Minichromosome maintenance protein 6 && PF00493:MCM2/3/5 family PF14551:MCM N-terminal domain                                                   |
| Lachesis_group0__13_contigs__l.g4415 | 235.3338 | 62.86301 | 1.905985 | 0.000755 | 0.00751  | 1533 | - && Q08220.1 RecName: Full=Glutathione synthetase; Short=GSH synthetase; Short=GSH-S; AltName: Full=Glutathione synthase && PF03917:Eukaryotic glutathione synthase, ATP binding domain PF03199:Eukaryotic glutathione synthase |
| Lachesis_group0__13_contigs__l.g9413 | 1024.639 | 273.9467 | 1.90368  | 0.000601 | 0.006354 | 3297 | - && Q4P2U5.1 RecName: Full=FACT complex subunit SPT16; AltName: Full=Facilitates chromatin transcription complex subunit SPT16 && PF08644:FACT complex subunit (SPT16/CDC68) PF14826:FACT complex subunit                       |

|                                       |          |          |          |          |          |      |                                                                                                                                                                                                                                                                                           |
|---------------------------------------|----------|----------|----------|----------|----------|------|-------------------------------------------------------------------------------------------------------------------------------------------------------------------------------------------------------------------------------------------------------------------------------------------|
|                                       |          |          |          |          |          |      | SPT16 N-terminal lobe domain PF00557:Metallopeptidase family M24 PF08512:Histone chaperone Rtt106-like                                                                                                                                                                                    |
| Lachesis_group0__13_contigs__l.g8957  | 454.2887 | 121.6208 | 1.90364  | 0.000225 | 0.003166 | 2202 | - && O60070.1 RecName: Full=Set1 complex component ash2; Short=Set1C component ash2; AltName: Full=COMPASS component ash2; AltName: Full=Complex proteins associated with set1 protein ash2; AltName: Full=Lid2 complex component ash2; Short=Lid2C component ash2 && PF00622:SPRY domain |
| Lachesis_group0__13_contigs__l.g11152 | 85.87378 | 23.0876  | 1.900049 | 0.007301 | 0.037999 | 1710 | - && - && PF12937:F-box-like PF13414:TPR repeat                                                                                                                                                                                                                                           |
| Lachesis_group0__13_contigs__l.g3516  | 2856.33  | 765.7704 | 1.899096 | 0.000403 | 0.004796 | 1794 | - && O94300.1 RecName: Full=Putative xanthine/uracil permease C887.17 && PF00860:Permease family                                                                                                                                                                                          |
| Lachesis_group0__13_contigs__l.g5673  | 6931.286 | 1858.634 | 1.898896 | 0.000137 | 0.002257 | 1401 | - && P34085.2 RecName: Full=Citrate synthase, mitochondrial; Flags: Precursor && PF00285:Citrate synthase                                                                                                                                                                                 |
| Lachesis_group0__13_contigs__l.g6402  | 2255.508 | 605.1364 | 1.898018 | 0.000151 | 0.002406 | 4827 | - && Q09878.2 RecName: Full=Probable sulfite reductase [NADPH] flavoprotein component && PF00175:Oxidoreductase NAD-binding domain PF00667:FAD binding domain PF00759:Glycosyl hydrolase family 9                                                                                         |
| Lachesis_group0__13_contigs__l.g2096  | 372.5781 | 100.3518 | 1.894476 | 0.000299 | 0.003864 | 3864 | - && - && PF00498:FHA domain                                                                                                                                                                                                                                                              |
| Lachesis_group0__13_contigs__l.g11288 | 239.7963 | 64.5166  | 1.89408  | 0.000309 | 0.003937 | 681  | - && Q8VY97.1 RecName: Full=ER membrane protein complex subunit 7 homolog; Flags: Precursor && PF09430:Protein of unknown function (DUF2012)                                                                                                                                              |

|                                       |          |          |          |          |          |      |                                                                                                                                                                                                                                |
|---------------------------------------|----------|----------|----------|----------|----------|------|--------------------------------------------------------------------------------------------------------------------------------------------------------------------------------------------------------------------------------|
| Lachesis_group0__13_contigs__l.g10617 | 1324.318 | 357.8364 | 1.887616 | 2.96E-05 | 0.000731 | 1941 | - && Q0CJV3.1 RecName: Full=Vacuolar protein sorting-associated protein 27 && PF01363:FYVE zinc finger PF03127:GAT domain PF00790:VHS domain                                                                                   |
| Lachesis_group0__13_contigs__l.g4241  | 1174.983 | 318.8632 | 1.880809 | 0.000415 | 0.004886 | 2073 | - && Q09768.1 RecName: Full=Glutamate--cysteine ligase; AltName: Full=Gamma-ECS; Short=GCS; AltName: Full=Gamma-glutamylcysteine synthetase && PF03074:Glutamate-cysteine ligase                                               |
| Lachesis_group0__13_contigs__l.g11078 | 1115.428 | 302.9334 | 1.880467 | 2.29E-05 | 0.000615 | 1563 | - && Q9D119.1 RecName: Full=Protein phosphatase 1 regulatory subunit 27; AltName: Full=Dysferlin-interacting protein 1 && PF13857:Ankyrin repeats (many copies) PF00887:Acyl CoA binding protein PF14622:Ribonuclease-III-like |
| Lachesis_group0__13_contigs__l.g2127  | 4486.986 | 1218.891 | 1.880273 | 0.000156 | 0.002463 | 993  | - && P47818.1 RecName: Full=Protein CCC1; AltName: Full=Cross-complementer of CSG1 protein 1 && PF01988:VIT family                                                                                                             |
| Lachesis_group0__13_contigs__l.g1154  | 134.0972 | 36.41079 | 1.88019  | 0.000494 | 0.005547 | 1797 | - && - && PF12937:F-box-like                                                                                                                                                                                                   |
| Lachesis_group0__13_contigs__l.g5871  | 2717.579 | 739.3765 | 1.877793 | 9.75E-05 | 0.001778 | 999  | - && P20654.1 RecName: Full=Serine/threonine-protein phosphatase PP1 && PF16891:Serine-threonine protein phosphatase N-terminal domain PF00149:Calcineurin-like phosphoesterase                                                |
| Lachesis_group0__13_contigs__l.g3566  | 547.9635 | 149.7278 | 1.874009 | 0.004237 | 0.025687 | 1176 | - && P50125.2 RecName: Full=Homocysteine synthase; AltName: Full=O-acetylhomoserine sulfhydrylase; Short=OAH SHL; Short=OAH sulfhydrylase && PF01053:Cys/Met metabolism PLP-dependent enzyme                                   |

|                                       |          |          |          |          |          |      |                                                                                                                                                                                                       |
|---------------------------------------|----------|----------|----------|----------|----------|------|-------------------------------------------------------------------------------------------------------------------------------------------------------------------------------------------------------|
| Lachesis_group0__13_contigs__l.g4645  | 638.7232 | 174.4356 | 1.872518 | 0.000229 | 0.003206 | 759  | - && Q7S910.2 RecName: Full=54S ribosomal protein L4, mitochondrial; Flags: Precursor && PF06984:Mitochondrial 39-S ribosomal protein L47 (MRP-L47)                                                   |
| Lachesis_group0__13_contigs__l.g9340  | 322.0726 | 87.93638 | 1.870757 | 0.000314 | 0.003984 | 888  | - && Q9Y7M5.2 RecName: Full=54S ribosomal protein L10, mitochondrial; Flags: Precursor && PF00828:Ribosomal protein L18e/L15                                                                          |
| Lachesis_group0__13_contigs__l.g2013  | 221.3382 | 60.51738 | 1.869275 | 0.000811 | 0.007948 | 2442 | - && - && PF07814:Wings apart-like protein regulation of heterochromatin                                                                                                                              |
| Lachesis_group0__13_contigs__l.g342   | 270.8359 | 74.18937 | 1.867962 | 0.000292 | 0.003794 | 2730 | - && Q24K12.1 RecName: Full=G patch domain-containing protein 1 && PF07713:Protein of unknown function (DUF1604) PF01585:G-patch domain                                                               |
| Lachesis_group0__13_contigs__l.g11036 | 858.0803 | 235.3609 | 1.866681 | 0.000414 | 0.004879 | 1863 | - && - && PF10297:Minimal binding motif of Hap4 for binding to Hap2/3/5                                                                                                                               |
| Lachesis_group0__13_contigs__l.g1348  | 142.5953 | 39.2397  | 1.86393  | 0.000335 | 0.004181 | 282  | - && P53733.1 RecName: Full=37S ribosomal protein S19, mitochondrial && PF00203:Ribosomal protein S19                                                                                                 |
| Lachesis_group0__13_contigs__l.g3983  | 42.83879 | 11.74559 | 1.863441 | 0.010776 | 0.049881 | 606  | - && P36088.1 RecName: Full=Free methionine-R-sulfoxide reductase; Short=fRMs; AltName: Full=GAF domain-containing protein YKL069W && -                                                               |
| Lachesis_group0__13_contigs__l.g8645  | 2220.441 | 610.5067 | 1.863214 | 0.000184 | 0.002723 | 381  | - && P0CQ53.1 RecName: Full=13 kDa ribonucleoprotein-associated protein >P0CQ52.1 RecName: Full=13 kDa ribonucleoprotein-associated protein && PF01248:Ribosomal protein L7Ae/L30e/S12e/Gadd45 family |
| Lachesis_group0__13_contigs__l.g6386  | 585.0568 | 161.0828 | 1.860515 | 9.34E-05 | 0.001734 | 2019 | - && - && PF13041:PPR repeat family                                                                                                                                                                   |

|                                       |          |          |          |          |          |      |                                                                                                                                                                                                                                                                                  |
|---------------------------------------|----------|----------|----------|----------|----------|------|----------------------------------------------------------------------------------------------------------------------------------------------------------------------------------------------------------------------------------------------------------------------------------|
| Lachesis_group0__13_contigs__l.g675   | 224.3808 | 61.93208 | 1.860426 | 0.002535 | 0.017806 | 1080 | - && O14242.2 RecName: Full=Putative pyridoxal kinase C6F6.11c && PF08543:Phosphomethylpyrimidine kinase                                                                                                                                                                         |
| Lachesis_group0__13_contigs__l.g9117  | 159.0604 | 43.83257 | 1.859051 | 0.000678 | 0.006966 | 1122 | - && O74627.1 RecName: Full=Cyclin pch1; AltName: Full=Pombe cyclin C homolog 1 && PF00134:Cyclin, N-terminal domain                                                                                                                                                             |
| Lachesis_group0__13_contigs__l.g10287 | 676.3667 | 186.5099 | 1.858733 | 0.000126 | 0.002118 | 1104 | - && Q6FL25.1 RecName: Full=37S ribosomal protein S9, mitochondrial; Flags: Precursor && PF00380:Ribosomal protein S9/S16                                                                                                                                                        |
| Lachesis_group0__13_contigs__l.g6369  | 438.7747 | 121.0079 | 1.858644 | 0.000143 | 0.002314 | 1926 | - && O13432.3 RecName: Full=Phenylalanine--tRNA ligase beta subunit; AltName: Full=Phenylalanyl-tRNA synthetase beta subunit; Short=PheRS && PF03484:tRNA synthetase B5 domain PF03483:B3/4 domain                                                                               |
| Lachesis_group0__13_contigs__l.g2166  | 13562.02 | 3742.721 | 1.857368 | 0.000215 | 0.003089 | 1437 | - && Q12618.1 RecName: Full=Acyl-CoA desaturase; AltName: Full=Delta(9)-desaturase; Short=Delta-9 desaturase; AltName: Full=Fatty acid desaturase; AltName: Full=Stearoyl-CoA desaturase && PF00487:Fatty acid desaturase PF00173:Cytochrome b5-like Heme/Steroid binding domain |
| Lachesis_group0__13_contigs__l.g10059 | 1288.587 | 355.6427 | 1.857145 | 0.000466 | 0.005323 | 1542 | - && P33886.1 RecName: Full=Protein kinase wis1; AltName: Full=Protein kinase sty2 && PF00069:Protein kinase domain                                                                                                                                                              |
| Lachesis_group0__13_contigs__l.g10632 | 516.922  | 143.041  | 1.855319 | 0.000212 | 0.00306  | 1974 | - && Q1ZXE8.1 RecName: Full=Signal recognition particle subunit SRP68; AltName: Full=Signal recognition particle 68 kDa protein homolog &&                                                                                                                                       |

|                                       |          |          |          |          |          |      |                                                                                                                                                                                                    |
|---------------------------------------|----------|----------|----------|----------|----------|------|----------------------------------------------------------------------------------------------------------------------------------------------------------------------------------------------------|
|                                       |          |          |          |          |          |      | PF16969:RNA-binding signal recognition particle 68                                                                                                                                                 |
| Lachesis_group0__13_contigs__l.g11209 | 584.1246 | 161.7816 | 1.853855 | 0.000147 | 0.002357 | 2340 | - && P0CQ93.1 RecName: Full=ATP-dependent RNA helicase DRS1 >P0CQ92.1 RecName: Full=ATP-dependent RNA helicase DRS1 && PF00270:DEAD/DEAH box helicase PF00271:Helicase conserved C-terminal domain |
| Lachesis_group0__13_contigs__l.g5933  | 526.1263 | 145.8415 | 1.853174 | 0.000204 | 0.002963 | 1854 | - && - && PF08202:Mis12-Mtw1 protein family                                                                                                                                                        |
| Lachesis_group0__13_contigs__l.g1963  | 597.6126 | 165.6374 | 1.851445 | 7.32E-05 | 0.001449 | 1452 | - && - && PF04577:Protein of unknown function (DUF563)                                                                                                                                             |
| Lachesis_group0__13_contigs__l.g8822  | 654.3406 | 181.4755 | 1.851011 | 0.000162 | 0.002523 | 1575 | - && Q09692.1 RecName: Full=Tryptophan--tRNA ligase, cytoplasmic; AltName: Full=Tryptophanyl-tRNA synthetase; Short=TrpRS && PF00579:tRNA synthetases class I (W and Y)                            |
| Lachesis_group0__13_contigs__l.g3425  | 1083.88  | 300.8631 | 1.849284 | 0.000237 | 0.00327  | 1185 | - && P36421.3 RecName: Full=Tyrosine--tRNA ligase, cytoplasmic; AltName: Full=Tyrosyl-tRNA synthetase; Short=TyrRS && PF00579:tRNA synthetases class I (W and Y)                                   |
| Lachesis_group0__13_contigs__l.g262   | 973.6605 | 270.7176 | 1.847164 | 0.000294 | 0.003816 | 978  | - && Q6C7A6.1 RecName: Full=Cytosolic Fe-S cluster assembly factor NBP35; AltName: Full=Nucleotide-binding protein 35 && PF10609:NUBPL iron-transfer P-loop NTPase                                 |
| Lachesis_group0__13_contigs__l.g2415  | 260.7332 | 72.66147 | 1.84683  | 0.002421 | 0.017292 | 1263 | - && P36605.1 RecName: Full=Histidinol-phosphate aminotransferase; AltName: Full=Imidazole acetol-phosphate transaminase && PF00155:Aminotransferase class I and II                                |

|                                      |          |          |          |          |          |      |                                                                                                                                                                                                                                                                                                |
|--------------------------------------|----------|----------|----------|----------|----------|------|------------------------------------------------------------------------------------------------------------------------------------------------------------------------------------------------------------------------------------------------------------------------------------------------|
| Lachesis_group0__13_contigs__l.g8652 | 1144.867 | 318.9687 | 1.844621 | 0.000156 | 0.002463 | 2853 | - && O14053.1 RecName: Full=U3 small nucleolar RNA-associated protein 21 homolog; Short=U3 snoRNA-associated protein 21 && PF04192:Utp21 specific WD40 associated putative domain                                                                                                              |
| Lachesis_group0__13_contigs__l.g5334 | 2361.401 | 659.2841 | 1.840998 | 0.000138 | 0.002264 | 1833 | - && G0SEV9.2 RecName: Full=Translation initiation factor RLI1; AltName: Full=ATP-binding cassette sub-family E member RLI1 && PF00037:4Fe-4S binding domain PF00005:ABC transporter PF04068:Possible Fer4-like domain in RNase L inhibitor, RLI PF07673:Protein of unknown function (DUF1602) |
| Lachesis_group0__13_contigs__l.g6979 | 141.7028 | 39.43031 | 1.840962 | 0.001133 | 0.010067 | 3636 | - && D3YWJ0.1 RecName: Full=Nuclear GTPase SLIP-GC; AltName: Full=Speckled-like pattern in the germinal center && PF00350:Dynammin family                                                                                                                                                      |
| Lachesis_group0__13_contigs__l.g2014 | 578.2933 | 161.9539 | 1.83831  | 0.001363 | 0.011409 | 2946 | - && - && PF00653:Inhibitor of Apoptosis domain                                                                                                                                                                                                                                                |
| Lachesis_group0__13_contigs__l.g5549 | 112.4542 | 31.49327 | 1.833005 | 0.002295 | 0.01663  | 807  | - && - && PF10197:N-terminal domain of CBF1 interacting co-repressor CIR                                                                                                                                                                                                                       |
| Lachesis_group0__13_contigs__l.g6760 | 445.8485 | 125.5551 | 1.829113 | 0.000222 | 0.003164 | 786  | - && Q9CQI7.1 RecName: Full=U2 small nuclear ribonucleoprotein B"; Short=U2 snRNP B" && PF00076:RNA recognition motif. (a.k.a. RRM, RBD, or RNP domain) PF13893:RNA recognition motif. (a.k.a. RRM, RBD, or RNP domain)                                                                        |
| Lachesis_group0__13_contigs__l.g7901 | 2107.221 | 593.8808 | 1.827615 | 0.000116 | 0.002    | 3480 | - && Q14562.1 RecName: Full=ATP-dependent RNA helicase DHX8; AltName: Full=DEAH box protein 8; AltName: Full=RNA helicase HRH1 && PF00271:Helicase conserved C-terminal domain PF07717:Oligonucleotide/oligosaccharide-binding (OB)-fold PF00575:S1 RNA binding                                |

|                                       |          |          |          |          |          |      |                                                                                                                                                                                                                                                                                                                                                                          |
|---------------------------------------|----------|----------|----------|----------|----------|------|--------------------------------------------------------------------------------------------------------------------------------------------------------------------------------------------------------------------------------------------------------------------------------------------------------------------------------------------------------------------------|
|                                       |          |          |          |          |          |      | domain PF04408:Helicase associated domain (HA2)                                                                                                                                                                                                                                                                                                                          |
| Lachesis_group0__13_contigs__l.g10159 | 2408.977 | 678.7159 | 1.827583 | 1.86E-05 | 0.000543 | 1725 | - && B0D0T8.1 RecName: Full=Transcription activator of gluconeogenesis ERT1 && -                                                                                                                                                                                                                                                                                         |
| Lachesis_group0__13_contigs__l.g8543  | 304.74   | 85.90708 | 1.826631 | 0.007111 | 0.037259 | 3525 | - && P17120.2 RecName: Full=Kinesin-like protein bimC && PF00225:Kinesin motor domain                                                                                                                                                                                                                                                                                    |
| Lachesis_group0__13_contigs__l.g11530 | 2402.455 | 678.0553 | 1.825296 | 1.32E-05 | 0.000411 | 1911 | - && A8N2M6.1 RecName: Full=Amino-acid acetyltransferase, mitochondrial; AltName: Full=Arginine-requiring protein 2; AltName: Full=Glutamate N-acetyltransferase; AltName: Full=N-acetylglutamate synthase; Short=AGS; Short=NAGS; Flags: Precursor && PF04768:NAT, N-acetyltransferase, of N-acetylglutamate synthase                                                   |
| Lachesis_group0__13_contigs__l.g8529  | 7832.235 | 2211.822 | 1.824325 | 0.000167 | 0.00256  | 1185 | - && P48466.1 RecName: Full=S-adenosylmethionine synthase; Short=AdoMet synthase; AltName: Full=Ethionine resistance protein 1; AltName: Full=Methionine adenosyltransferase; Short=MAT && PF02773:S-adenosylmethionine synthetase, C-terminal domain PF02772:S-adenosylmethionine synthetase, central domain PF00438:S-adenosylmethionine synthetase, N-terminal domain |
| Lachesis_group0__13_contigs__l.g114   | 541.8554 | 153.0775 | 1.823116 | 2.99E-05 | 0.000733 | 1272 | - && - && PF01694:Rhomboid family                                                                                                                                                                                                                                                                                                                                        |
| Lachesis_group0__13_contigs__l.g8088  | 226.9297 | 64.02211 | 1.822807 | 0.00032  | 0.004041 | 1734 | - && O94725.1 RecName: Full=Protein-glutamate O-methyltransferase C1393.13 && PF01937:Protein of unknown function DUF89                                                                                                                                                                                                                                                  |



|                                      |          |          |          |          |          |      |                                                                                                                                                                                                                                                                                                                                                                                 |
|--------------------------------------|----------|----------|----------|----------|----------|------|---------------------------------------------------------------------------------------------------------------------------------------------------------------------------------------------------------------------------------------------------------------------------------------------------------------------------------------------------------------------------------|
| Lachesis_group0__13_contigs__l.g6920 | 1995.133 | 564.1367 | 1.822381 | 7.33E-05 | 0.001449 | 1299 | - && Q6GMI9.2 RecName: Full=UDP-glucuronic acid decarboxylase 1; AltName: Full=UDP-glucuronate decarboxylase 1; Short=UXS-1 && PF16363:GDP-mannose 4,6 dehydratase                                                                                                                                                                                                              |
| Lachesis_group0__13_contigs__l.g9051 | 2977.695 | 842.1539 | 1.822018 | 2.23E-05 | 0.000603 | 6465 | - && Q9C102.1 RecName: Full=Putative glutamate synthase [NADPH]; AltName: Full=NADPH-GOGAT && PF04898:Glutamate synthase central domain PF00310:Glutamine amidotransferases class-II PF01493:GXGXX motif PF14691:Dihydropyrimidine dehydrogenase domain II, 4Fe-4S cluster PF01645:Conserved region in glutamate synthase PF07992:Pyridine nucleotide-disulphide oxidoreductase |
| Lachesis_group0__13_contigs__l.g2651 | 3226.83  | 913.5943 | 1.820824 | 0.000342 | 0.004236 | 1155 | - && Q9Y7I8.2 RecName: Full=Zuotin; AltName: Full=DnaJ-related protein zuo1; Short=J protein zuo1; AltName: Full=Ribosome-associated complex subunit zuo1 && PF00226:DnaJ domain                                                                                                                                                                                                |
| Lachesis_group0__13_contigs__l.g8240 | 591.5434 | 167.357  | 1.820079 | 0.001061 | 0.009685 | 1209 | - && - && PF00046:Homeobox domain                                                                                                                                                                                                                                                                                                                                               |
| Lachesis_group0__13_contigs__l.g5291 | 650.6706 | 184.4884 | 1.819255 | 0.000307 | 0.003919 | 2406 | - && P78963.2 RecName: Full=Protein arginine N-methyltransferase skb1; AltName: Full=Shk1 kinase-binding protein 1; AltName: Full=Type II protein arginine N-methyltransferase; Short=Type II PRMT && PF05185:PRMT5 arginine-N-methyltransferase PF13857:Ankyrin repeats (many copies)                                                                                          |
| Lachesis_group0__13_contigs__l.g8905 | 3821.695 | 1083.262 | 1.818865 | 0.005516 | 0.030999 | 1686 | - && Q01772.1 RecName: Full=Aldehyde oxidase GLOX; AltName: Full=Glyoxal oxidase; Short=GLOX; Flags: Precursor && PF07250:Glyoxal                                                                                                                                                                                                                                               |

|                                       |          |          |          |          |          |      |                                                                                                                                                                                                                                                                                                                      |
|---------------------------------------|----------|----------|----------|----------|----------|------|----------------------------------------------------------------------------------------------------------------------------------------------------------------------------------------------------------------------------------------------------------------------------------------------------------------------|
|                                       |          |          |          |          |          |      | oxidase N-terminus PF09118:Domain of unknown function (DUF1929)                                                                                                                                                                                                                                                      |
| Lachesis_group0__13_contigs__l.g297   | 6363.444 | 1810.05  | 1.813981 | 0.000335 | 0.004181 | 4278 | - && P46056.1 RecName: Full=Carbamoyl-phosphate synthase arginine-specific large chain; AltName: Full=Arginine-specific carbamoyl-phosphate synthetase, ammonia chain && PF02786:Carbamoyl-phosphate synthase L chain, ATP binding domain PF02787:Carbamoyl-phosphate synthetase large chain, oligomerisation domain |
| Lachesis_group0__13_contigs__l.g9977  | 796.4991 | 227.0551 | 1.810473 | 0.000348 | 0.004287 | 1269 | - && - && PF07766:LETM1-like protein                                                                                                                                                                                                                                                                                 |
| Lachesis_group0__13_contigs__l.g138   | 1593.445 | 454.6594 | 1.809429 | 0.000376 | 0.004553 | 4479 | - && Q4P7M1.1 RecName: Full=ATP-dependent RNA helicase DBP9 && PF00270:DEAD/DEAH box helicase PF00271:Helicase conserved C-terminal domain                                                                                                                                                                           |
| Lachesis_group0__13_contigs__l.g5382  | 269.8056 | 76.97443 | 1.809192 | 0.000323 | 0.004078 | 1485 | - && Q06137.1 RecName: Full=Putative 6-phosphofructo-2-kinase/fructose-2,6-bisphosphatase YLR345W; Includes: RecName: Full=6-phosphofructo-2-kinase; Includes: RecName: Full=Fructose-2,6-bisphosphatase && PF00300:Histidine phosphatase superfamily (branch 1) PF01591:6-phosphofructo-2-kinase                    |
| Lachesis_group0__13_contigs__l.g10764 | 1656.576 | 472.9616 | 1.808888 | 0.000554 | 0.006024 | 3171 | - && Q09833.1 RecName: Full=tRNA (uracil(54)-C(5))-methyltransferase && PF05958:tRNA (Uracil-5-)-methyltransferase                                                                                                                                                                                                   |
| Lachesis_group0__13_contigs__l.g2110  | 1963.135 | 561.5347 | 1.806398 | 0.00023  | 0.003211 | 1356 | - && - && PF11735:Cryptococcal mannosyltransferase 1                                                                                                                                                                                                                                                                 |

|                                       |          |          |          |          |          |      |                                                                                                                                                                                |
|---------------------------------------|----------|----------|----------|----------|----------|------|--------------------------------------------------------------------------------------------------------------------------------------------------------------------------------|
| Lachesis_group0__13_contigs__l.g6391  | 567.4263 | 162.4308 | 1.806146 | 0.000557 | 0.006033 | 1281 | - && Q54CP1.1 RecName: Full=Ribosomal RNA-processing protein 8 && PF05148:Hypothetical methyltransferase                                                                       |
| Lachesis_group0__13_contigs__l.g8893  | 313.3811 | 89.85617 | 1.804392 | 0.002471 | 0.017509 | 648  | - && Q9UVT8.1 RecName: Full=6,7-dimethyl-8-ribityllumazine synthase; Short=DMRL synthase; Short=LS; Short=Lumazine synthase && PF00885:6,7-dimethyl-8-ribityllumazine synthase |
| Lachesis_group0__13_contigs__l.g10621 | 618.9008 | 177.5313 | 1.802217 | 0.00018  | 0.002681 | 1290 | - && O14341.2 RecName: Full=54S ribosomal protein L35, mitochondrial; Flags: Precursor && PF01161:Phosphatidylethanolamine-binding protein                                     |
| Lachesis_group0__13_contigs__l.g11289 | 252.6057 | 72.42783 | 1.802117 | 0.001847 | 0.01427  | 837  | - && O74862.1 RecName: Full=rRNA-processing protein utp23; AltName: Full=U three protein 23 && PF04900:Fcf1                                                                    |
| Lachesis_group0__13_contigs__l.g176   | 449.6046 | 129.417  | 1.798134 | 0.00021  | 0.003031 | 1380 | - && - && PF10236:Mitochondrial ribosomal death-associated protein 3                                                                                                           |
| Lachesis_group0__13_contigs__l.g8723  | 82.22636 | 23.8019  | 1.796785 | 0.006269 | 0.033969 | 3117 | - && - && PF10193:Telomere length regulation protein                                                                                                                           |
| Lachesis_group0__13_contigs__l.g3982  | 1411.928 | 406.9817 | 1.795549 | 0.001766 | 0.013753 | 2346 | - && P53852.1 RecName: Full=Cysteine--tRNA ligase; AltName: Full=CysteinyI-tRNA synthetase; Short=CysRS && PF01406:tRNA synthetases class I (C) catalytic domain               |
| Lachesis_group0__13_contigs__l.g6468  | 942.1258 | 271.5066 | 1.793969 | 0.000631 | 0.006583 | 876  | - && O13774.1 RecName: Full=GTP cyclohydrolase 1; AltName: Full=GTP cyclohydrolase I; Short=GTP-CH-I && PF01227:GTP cyclohydrolase I                                           |
| Lachesis_group0__13_contigs__l.g8920  | 645.4573 | 186.2135 | 1.792842 | 0.000782 | 0.007721 | 1437 | - && P0CL91.1 RecName: Full=Protein BFR2 >P0CL90.1 RecName: Full=Protein BFR2 &&                                                                                               |

|                                      |          |          |          |          |          |      |                                                                                                                                                                                                                                                                    |
|--------------------------------------|----------|----------|----------|----------|----------|------|--------------------------------------------------------------------------------------------------------------------------------------------------------------------------------------------------------------------------------------------------------------------|
|                                      |          |          |          |          |          |      | PF13339:Apoptosis antagonizing transcription factor PF08164:Apoptosis-antagonizing transcription factor, C-terminal                                                                                                                                                |
| Lachesis_group0__13_contigs__l.g2709 | 357.361  | 103.5226 | 1.790291 | 0.005517 | 0.030999 | 2334 | - && Q10332.1 RecName: Full=Uncharacterized ATP-dependent helicase C582.10c && PF00271:Helicase conserved C-terminal domain PF00176:SNF2 family N-terminal domain                                                                                                  |
| Lachesis_group0__13_contigs__l.g267  | 1680.723 | 487.953  | 1.784412 | 7.99E-05 | 0.001546 | 1896 | - && P0C155.1 PUTATIVE PSEUDOGENE: RecName: Full=Putative carboxypeptidase YOL153C && PF07687:Peptidase dimerisation domain PF01546:Peptidase family M20/M25/M40                                                                                                   |
| Lachesis_group0__13_contigs__l.g8301 | 505.4413 | 147.0811 | 1.782117 | 0.000878 | 0.008412 | 1839 | - && O74468.1 RecName: Full=Probable uroporphyrinogen-III C-methyltransferase && PF14823:Sirohaem biosynthesis protein C-terminal PF13241:Putative NAD(P)-binding PF00590:Tetrapyrrole (Corrin/Porphyrin) Methylases PF14824:Sirohaem biosynthesis protein central |
| Lachesis_group0__13_contigs__l.g5685 | 466.1749 | 135.705  | 1.77977  | 0.000292 | 0.003794 | 987  | - && P0C1I9.1 RecName: Full=Peptidyl-prolyl cis-trans isomerase cyp11; Short=PPIase cyp11; AltName: Full=Cyclophilin cyp11; AltName: Full=Rotamase cyp11 && PF00160:Cyclophilin type peptidyl-prolyl cis-trans isomerase/CLD                                       |
| Lachesis_group0__13_contigs__l.g6624 | 3133.151 | 913.4994 | 1.778309 | 0.000324 | 0.004081 | 549  | - && P38116.4 RecName: Full=ADP-ribosylation factor-like protein 1; AltName: Full=Arf-like GTPase 1 && PF00025:ADP-ribosylation factor family                                                                                                                      |

|                                       |          |          |          |          |          |      |                                                                                                                                                                         |
|---------------------------------------|----------|----------|----------|----------|----------|------|-------------------------------------------------------------------------------------------------------------------------------------------------------------------------|
| Lachesis_group0__13_contigs__l.g10614 | 317.4135 | 92.7358  | 1.777381 | 0.0006   | 0.006341 | 858  | - && O74907.2 RecName: Full=Protein bcp1 && PF13862:p21-C-terminal region-binding protein                                                                               |
| Lachesis_group0__13_contigs__l.g6486  | 565.243  | 165.0379 | 1.77714  | 0.000418 | 0.004901 | 1359 | - && Q9N4Z0.2 RecName: Full=L-2-hydroxyglutarate dehydrogenase, mitochondrial; Flags: Precursor && PF01266:FAD dependent oxidoreductase                                 |
| Lachesis_group0__13_contigs__l.g7071  | 124.6929 | 36.3344  | 1.775923 | 0.000807 | 0.007926 | 2349 | - && P42935.1 RecName: Full=Elongator complex protein 2; AltName: Full=Gamma-toxin target 2 && -                                                                        |
| Lachesis_group0__13_contigs__l.g4911  | 23689.79 | 6948.974 | 1.769388 | 0.000108 | 0.001909 | 2979 | - && - && PF11951:Fungal specific transcription factor domain                                                                                                           |
| Lachesis_group0__13_contigs__l.g9238  | 630.3279 | 185.0097 | 1.768474 | 0.000175 | 0.002639 | 1980 | - && A8NVW1.2 RecName: Full=Mitochondrial outer membrane protein IML2 && PF10300:Protein of unknown function (DUF3808)                                                  |
| Lachesis_group0__13_contigs__l.g11077 | 256.0863 | 75.34021 | 1.768256 | 0.000969 | 0.009066 | 342  | - && O43020.2 RecName: Full=Probable 37S ribosomal protein S16, mitochondrial && PF00886:Ribosomal protein S16                                                          |
| Lachesis_group0__13_contigs__l.g7194  | 235.91   | 69.54624 | 1.766991 | 0.006199 | 0.033705 | 870  | - && Q05918.1 RecName: Full=Tyrosine-protein phosphatase; Flags: Precursor && PF13350:Tyrosine phosphatase family PF13348:Tyrosine phosphatase family C-terminal region |
| Lachesis_group0__13_contigs__l.g5875  | 2341.271 | 688.5745 | 1.76575  | 0.000183 | 0.002718 | 1533 | - && A1CJ18.1 RecName: Full=ATP-dependent RNA helicase dhh1 && PF00270:DEAD/DEAH box helicase PF00271:Helicase conserved C-terminal domain                              |
| Lachesis_group0__13_contigs__l.g9079  | 2220.792 | 653.4676 | 1.765162 | 0.000901 | 0.008604 | 2244 | - && O94268.1 RecName: Full=25S rRNA (cytosine-C(5))-methyltransferase nop2; AltName:                                                                                   |

|                                       |          |          |          |          |          |      |                                                                                                                                                                                                                                                                                                                                                                                                |
|---------------------------------------|----------|----------|----------|----------|----------|------|------------------------------------------------------------------------------------------------------------------------------------------------------------------------------------------------------------------------------------------------------------------------------------------------------------------------------------------------------------------------------------------------|
|                                       |          |          |          |          |          |      | Full=Nucleolar protein 2 && PF01189:16S rRNA methyltransferase RsmF PF17125:N-terminal domain of 16S rRNA methyltransferase RsmF                                                                                                                                                                                                                                                               |
| Lachesis_group0__13_contigs__l.g2733  | 2180.724 | 641.796  | 1.764898 | 0.001119 | 0.010032 | 1989 | - && Q5AKA5.1 RecName: Full=Cys-Gly metallodipeptidase DUG1; AltName: Full=Deficient in utilization of glutathione protein 1; AltName: Full=GSH degradosomal complex subunit DUG1 && PF07687:Peptidase dimerisation domain PF01546:Peptidase family M20/M25/M40                                                                                                                                |
| Lachesis_group0__13_contigs__l.g10153 | 1666.883 | 491.3302 | 1.762674 | 6.24E-05 | 0.001272 | 1701 | - && P0CR53.1 RecName: Full=Pre-mRNA-splicing factor SLU7 >P0CR52.1 RecName: Full=Pre-mRNA-splicing factor SLU7 && PF11708:Pre-mRNA splicing Prp18-interacting factor                                                                                                                                                                                                                          |
| Lachesis_group0__13_contigs__l.g2950  | 4743.282 | 1398.564 | 1.762088 | 2.70E-05 | 0.00069  | 1500 | - && O13639.1 RecName: Full=Adenosylhomocysteinase; Short=AdoHcyase; AltName: Full=S-adenosyl-L-homocysteine hydrolase && PF00670:S-adenosyl-L-homocysteine hydrolase, NAD binding domain PF05221:S-adenosyl-L-homocysteine hydrolase                                                                                                                                                          |
| Lachesis_group0__13_contigs__l.g7407  | 3678.253 | 1084.749 | 1.761916 | 0.000157 | 0.002469 | 2235 | - && Q4P6G4.1 RecName: Full=Eukaryotic translation initiation factor 3 subunit B; Short=eIF3b; AltName: Full=Eukaryotic translation initiation factor 3 90 kDa subunit homolog; Short=eIF3 p90; AltName: Full=Translation initiation factor eIF3 p90 subunit homolog && PF00076:RNA recognition motif. (a.k.a. RRM, RBD, or RNP domain) PF08662:Eukaryotic translation initiation factor eIF2A |

|                                      |          |          |          |          |          |      |                                                                                                                                                                                                                   |
|--------------------------------------|----------|----------|----------|----------|----------|------|-------------------------------------------------------------------------------------------------------------------------------------------------------------------------------------------------------------------|
| Lachesis_group0__13_contigs__l.g6823 | 72.47468 | 21.41857 | 1.759798 | 0.010369 | 0.048444 | 1062 | - && - && PF00561:alpha/beta hydrolase fold                                                                                                                                                                       |
| Lachesis_group0__13_contigs__l.g1294 | 1237.826 | 366.0075 | 1.758846 | 0.001338 | 0.011258 | 2220 | - && Q9UUD0.1 RecName: Full=Uncharacterized protein C19C2.10 && PF03114:BAR domain PF14604:Variant SH3 domain                                                                                                     |
| Lachesis_group0__13_contigs__l.g4606 | 313.3839 | 92.69321 | 1.758033 | 0.000759 | 0.007536 | 2973 | - && - && PF14197:Centrosome localisation domain of PPC89 PF06657:Centrosome microtubule-binding domain of Cep57                                                                                                  |
| Lachesis_group0__13_contigs__l.g1021 | 129.1452 | 38.35205 | 1.754896 | 0.005184 | 0.029691 | 1074 | - && O14003.2 RecName: Full=Replication factor C subunit 3; Short=Replication factor C3 && PF00004:ATPase family associated with various cellular activities (AAA) PF08542:Replication factor C C-terminal domain |
| Lachesis_group0__13_contigs__l.g1585 | 251.7937 | 74.86303 | 1.753639 | 0.000903 | 0.008618 | 5808 | - && P24686.2 RecName: Full=Negative regulator of mitosis; AltName: Full=Anaphase-promoting complex subunit 1 && PF12859:Anaphase-promoting complex subunit 1                                                     |
| Lachesis_group0__13_contigs__l.g1536 | 1224.326 | 363.404  | 1.753144 | 0.000208 | 0.00301  | 4551 | - && Q9US40.1 RecName: Full=Uncharacterized amino-acid permease C1039.01 && PF13086:AAA domain PF13520:Amino acid permease PF13087:AAA domain                                                                     |
| Lachesis_group0__13_contigs__l.g1228 | 443.5494 | 131.8135 | 1.752677 | 0.000418 | 0.004901 | 1425 | - && Q05911.1 RecName: Full=Adenylosuccinate lyase; Short=ASL; AltName: Full=Adenylosuccinase; Short=ASase && PF00206:Lyase PF10397:Adenylosuccinate lyase C-terminus                                             |
| Lachesis_group0__13_contigs__l.g5919 | 3152.117 | 935.5719 | 1.752629 | 0.000133 | 0.002208 | 3033 | - && Q4P763.1 RecName: Full=GMP synthase [glutamine-hydrolyzing]; AltName: Full=GMP synthetase; AltName: Full=Glutamine                                                                                           |

|                                       |          |          |          |          |          |      |                                                                                                                                                                                                           |
|---------------------------------------|----------|----------|----------|----------|----------|------|-----------------------------------------------------------------------------------------------------------------------------------------------------------------------------------------------------------|
|                                       |          |          |          |          |          |      | amidotransferase && PF02540:NAD synthase PF00958:GMP synthase C terminal domain PF00117:Glutamine amidotransferase class-I PF04303:PrpF protein                                                           |
| Lachesis_group0__13_contigs__l.g10605 | 846.7354 | 251.8931 | 1.75014  | 0.000333 | 0.00416  | 1161 | - && Q9UT34.1 RecName: Full=Uncharacterized protein C824.09c && PF01412:Putative GTPase activating protein for Arf                                                                                        |
| Lachesis_group0__13_contigs__l.g3102  | 833.9385 | 248.1197 | 1.749823 | 0.003231 | 0.021154 | 1188 | - && Q03392.1 RecName: Full=Proliferating cell nuclear antigen; Short=PCNA && PF02747:Proliferating cell nuclear antigen, C-terminal domain PF00705:Proliferating cell nuclear antigen, N-terminal domain |
| Lachesis_group0__13_contigs__l.g6933  | 410.3656 | 122.6566 | 1.745462 | 0.002959 | 0.019804 | 1146 | - && O74777.1 RecName: Full=KRR1 small subunit processome component homolog; AltName: Full=KRR-R motif-containing protein 1; AltName: Full=Ribosomal RNA assembly protein mis3 && -                       |
| Lachesis_group0__13_contigs__l.g601   | 1226.737 | 366.1073 | 1.744209 | 0.001854 | 0.014318 | 1674 | - && P25340.2 RecName: Full=Delta(24(24(1)))sterol reductase; AltName: Full=C-24(28) sterol reductase; AltName: Full=Sterol Delta(24(28))-reductase && PF01222:Ergosterol biosynthesis ERG4/ERG24 family  |
| Lachesis_group0__13_contigs__l.g6912  | 584.0218 | 174.5342 | 1.744082 | 0.004052 | 0.024911 | 4092 | - && - && PF11715:Nucleoporin Nup120/160                                                                                                                                                                  |
| Lachesis_group0__13_contigs__l.g5070  | 1008.369 | 301.2711 | 1.743861 | 0.000707 | 0.007174 | 2193 | - && P0CM02.1 RecName: Full=Homoaconitase, mitochondrial; AltName: Full=Homoaconitate hydratase; Flags: Precursor && PF00694:Aconitase C-terminal domain PF00330:Aconitase family (aconitate hydratase)   |



|                                       |          |          |          |          |          |      |                                                                                                                                                                                                                                                      |
|---------------------------------------|----------|----------|----------|----------|----------|------|------------------------------------------------------------------------------------------------------------------------------------------------------------------------------------------------------------------------------------------------------|
| Lachesis_group0__13_contigs__l.g6821  | 1187.595 | 355.3261 | 1.741116 | 0.001364 | 0.011409 | 3051 | - && Q5AT15.1 RecName: Full=Serine O-acetyltransferase; Flags: Precursor && PF00561:alpha/beta hydrolase fold                                                                                                                                        |
| Lachesis_group0__13_contigs__l.g10371 | 3808.913 | 1140.851 | 1.739342 | 0.000123 | 0.002081 | 3510 | - && O59811.1 RecName: Full=Cytoplasmic 60S subunit biogenesis factor SPCC550.15c; AltName: Full=pre-60S factor REI1 homolog && PF00481:Protein phosphatase 2C PF12756:C2H2 type zinc-finger (2 copies) PF12874:Zinc-finger of C2H2 type             |
| Lachesis_group0__13_contigs__l.g8549  | 742.4138 | 222.432  | 1.739297 | 0.000972 | 0.009074 | 948  | - && Q7ZV50.1 RecName: Full=Magnesium transporter protein 1; Short=MagT1; Flags: Precursor && PF04756:OST3 / OST6 family                                                                                                                             |
| Lachesis_group0__13_contigs__l.g1827  | 378.8118 | 114.1849 | 1.732728 | 0.001014 | 0.009373 | 2994 | - && P37202.1 RecName: Full=Exosome complex exonuclease dis3; AltName: Full=Chromosome disjunction protein 3; AltName: Full=Mitotic control protein dis3; AltName: Full=Ribosomal RNA-processing protein 44 && PF13638:PIN domain PF00773:RNB domain |
| Lachesis_group0__13_contigs__l.g811   | 594.1301 | 178.7431 | 1.731658 | 0.000515 | 0.00571  | 1677 | - && C8V3W5.1 RecName: Full=NAD-dependent protein deacetylase hst1; AltName: Full=Homologous to SIR2 protein 1; AltName: Full=Regulatory protein SIR2 homolog 1 && PF02146:Sir2 family                                                               |
| Lachesis_group0__13_contigs__l.g5564  | 249.0734 | 75.01932 | 1.727178 | 0.010175 | 0.047784 | 1839 | - && Q8NK72.2 RecName: Full=DNA repair and recombination protein rhm52; AltName: Full=RAD52 homolog && PF04098:Rad52/22 family double-strand break repair protein                                                                                    |

|                                       |          |          |          |          |          |      |                                                                                                                                                                                                                                                |
|---------------------------------------|----------|----------|----------|----------|----------|------|------------------------------------------------------------------------------------------------------------------------------------------------------------------------------------------------------------------------------------------------|
| Lachesis_group0__13_contigs__l.g8731  | 238.4596 | 72.09466 | 1.726638 | 0.001248 | 0.010759 | 1605 | - && O48520.2 RecName: Full=DNA polymerase delta small subunit && PF04042:DNA polymerase alpha/epsilon subunit B                                                                                                                               |
| Lachesis_group0__13_contigs__l.g1078  | 361.7352 | 109.5034 | 1.726285 | 0.001948 | 0.014818 | 1770 | - && - && PF12937:F-box-like                                                                                                                                                                                                                   |
| Lachesis_group0__13_contigs__l.g5930  | 5246.927 | 1587.09  | 1.724968 | 0.000596 | 0.006325 | 1317 | - && P00046.3 RecName: Full=Cytochrome c && PF02270:Transcription initiation factor IIF, beta subunit PF00034:Cytochrome c                                                                                                                     |
| Lachesis_group0__13_contigs__l.g10991 | 249.8229 | 75.87635 | 1.724045 | 0.006976 | 0.03662  | 2340 | - && A3M0B1.2 RecName: Full=Pre-rRNA-processing protein IPI1 && PF12333:Rix1 complex component involved in 60S ribosome maturation                                                                                                             |
| Lachesis_group0__13_contigs__l.g1461  | 3231.269 | 978.3328 | 1.724005 | 0.001329 | 0.011227 | 609  | - && - && PF10342:Ser-Thr-rich glycosyl-phosphatidyl-inositol-anchored membrane family                                                                                                                                                         |
| Lachesis_group0__13_contigs__l.g8187  | 1057.908 | 320.9486 | 1.720906 | 0.001227 | 0.010624 | 1179 | - && Q9Y7P4.2 RecName: Full=54S ribosomal protein rml2, mitochondrial; Short=L2 && PF00181:Ribosomal Proteins L2, RNA binding domain PF03947:Ribosomal Proteins L2, C-terminal domain                                                          |
| Lachesis_group0__13_contigs__l.g9351  | 499.2294 | 151.7799 | 1.718666 | 0.00037  | 0.004501 | 2529 | - && - && PF05622:HOOK protein                                                                                                                                                                                                                 |
| Lachesis_group0__13_contigs__l.g8892  | 1918.143 | 583.0601 | 1.718582 | 0.000697 | 0.007118 | 1521 | - && Q9P785.1 RecName: Full=LisH domain-containing protein C1711.05 && PF05022:SRP40, C-terminal domain                                                                                                                                        |
| Lachesis_group0__13_contigs__l.g10377 | 2359.608 | 717.1395 | 1.718391 | 0.000316 | 0.004001 | 1317 | - && P17707.2 RecName: Full=S-adenosylmethionine decarboxylase proenzyme; Short=AdoMetDC; Short=SAMDC; Contains: RecName: Full=S-adenosylmethionine decarboxylase alpha chain; Contains: RecName: Full=S-adenosylmethionine decarboxylase beta |

|                                      |          |          |          |          |          |      |                                                                                                                                                                                                                                                                                                              |
|--------------------------------------|----------|----------|----------|----------|----------|------|--------------------------------------------------------------------------------------------------------------------------------------------------------------------------------------------------------------------------------------------------------------------------------------------------------------|
|                                      |          |          |          |          |          |      | chain; PF01536:Adenosylmethionine decarboxylase                                                                                                                                                                                                                                                              |
| Lachesis_group0__13_contigs__l.g7917 | 443.2055 | 134.8545 | 1.71723  | 0.000767 | 0.007613 | 1338 | - && Q9HD43.3 RecName: Full=Receptor-type tyrosine-protein phosphatase H; Short=R-PTP-H; AltName: Full=Stomach cancer-associated protein tyrosine phosphatase 1; Short=SAP-1; AltName: Full=Transmembrane-type protein-tyrosine phosphatase type H; Flags: Precursor && PF00102:Protein-tyrosine phosphatase |
| Lachesis_group0__13_contigs__l.g2280 | 11990.61 | 3648.901 | 1.716377 | 0.003092 | 0.020481 | 2280 | - && A8PDE3.1 RecName: Full=Acetyl-coenzyme A synthetase; AltName: Full=Acetate--CoA ligase; AltName: Full=Acyl-activating enzyme && PF13193:AMP-binding enzyme C-terminal domain PF16177:Acetyl-coenzyme A synthetase N-terminus PF00501:AMP-binding enzyme                                                 |
| Lachesis_group0__13_contigs__l.g5015 | 836.4814 | 255.1385 | 1.713203 | 0.000156 | 0.002463 | 1899 | - && Q9US44.1 RecName: Full=Uncharacterized transporter C1002.16c && PF07690:Major Facilitator Superfamily                                                                                                                                                                                                   |
| Lachesis_group0__13_contigs__l.g6437 | 284.9951 | 87.11665 | 1.712706 | 0.001601 | 0.012759 | 1407 | - && O36014.1 RecName: Full=Aspartyl aminopeptidase 1 && PF02127:Aminopeptidase I zinc metalloprotease (M18)                                                                                                                                                                                                 |
| Lachesis_group0__13_contigs__l.g9042 | 251.5773 | 76.86166 | 1.712056 | 0.001767 | 0.013753 | 2076 | - && O74113.1 RecName: Full=Cell division control protein 45 homolog; AltName: Full=Suppressor of nda4 protein && PF02724:CDC45-like protein                                                                                                                                                                 |
| Lachesis_group0__13_contigs__l.g6749 | 350.8445 | 107.3113 | 1.711978 | 0.003054 | 0.02029  | 2934 | - && P0CN25.1 RecName: Full=DNA polymerase epsilon subunit B; AltName: Full=DNA polymerase II subunit 2 >P0CN24.1 RecName: Full=DNA polymerase epsilon subunit B; AltName: Full=DNA                                                                                                                          |

|                                      |          |          |          |          |          |      |                                                                                                                                                                                                                                                                                                                                                                                               |
|--------------------------------------|----------|----------|----------|----------|----------|------|-----------------------------------------------------------------------------------------------------------------------------------------------------------------------------------------------------------------------------------------------------------------------------------------------------------------------------------------------------------------------------------------------|
|                                      |          |          |          |          |          |      | polymerase II subunit 2 &&<br>PF00583:Acetyltransferase (GNAT)<br>family PF04042:DNA polymerase alpha/epsilon<br>subunit B                                                                                                                                                                                                                                                                    |
| Lachesis_group0__13_contigs__l.g2342 | 458.4177 | 140.3433 | 1.709387 | 0.001543 | 0.012415 | 1785 | - && O74999.1 RecName: Full=DNA repair protein<br>rhp7; AltName: Full=RAD7 homolog && -                                                                                                                                                                                                                                                                                                       |
| Lachesis_group0__13_contigs__l.g3182 | 266.9903 | 81.82543 | 1.707583 | 0.003323 | 0.021578 | 2385 | - && - && PF04121:Nuclear pore protein 84 / 107                                                                                                                                                                                                                                                                                                                                               |
| Lachesis_group0__13_contigs__l.g8947 | 137.3819 | 41.96265 | 1.707321 | 0.009463 | 0.045451 | 627  | - && - && PF07264:Etoposide-induced protein 2.4<br>(EI24)                                                                                                                                                                                                                                                                                                                                     |
| Lachesis_group0__13_contigs__l.g5966 | 8816.209 | 2703.251 | 1.70552  | 0.004263 | 0.025803 | 324  | - && - && PF01185:Fungal hydrophobin                                                                                                                                                                                                                                                                                                                                                          |
| Lachesis_group0__13_contigs__l.g7764 | 84.13832 | 25.68253 | 1.704893 | 0.009037 | 0.044047 | 1269 | - && - && PF12937:F-box-like                                                                                                                                                                                                                                                                                                                                                                  |
| Lachesis_group0__13_contigs__l.g6925 | 4470.293 | 1371.713 | 1.704611 | 0.000972 | 0.009074 | 1698 | - && Q4PBF2.1 RecName: Full=Nucleolar protein<br>58 && PF01798:snoRNA binding domain,<br>fibrillarin PF08156:NOP5NT (NUC127) domain                                                                                                                                                                                                                                                           |
| Lachesis_group0__13_contigs__l.g32   | 9011.58  | 2770.012 | 1.702009 | 0.000462 | 0.005292 | 3222 | - && O60100.1 RecName: Full=Probable importin<br>subunit beta-4; AltName: Full=Importin-123;<br>AltName: Full=Karyopherin subunit beta-4;<br>AltName: Full=Karyopherin-123 &&<br>PF03810:Importin-beta N-terminal domain                                                                                                                                                                      |
| Lachesis_group0__13_contigs__l.g7405 | 4303.136 | 1323.039 | 1.701831 | 0.00072  | 0.007266 | 1146 | - && P0CP98.1 RecName: Full=FK506-binding<br>protein 4; AltName: Full=Histone proline<br>isomerase; AltName: Full=Peptidyl-prolyl cis-trans<br>isomerase; Short=PPIase; AltName:<br>Full=Rotamase >P0CP99.1 RecName: Full=FK506-<br>binding protein 4; AltName: Full=Histone proline<br>isomerase; AltName: Full=Peptidyl-prolyl cis-trans<br>isomerase; Short=PPIase; AltName: Full=Rotamase |

|                                       |          |          |          |          |          |      |                                                                                                                                                                                                                                                                                                                                              |
|---------------------------------------|----------|----------|----------|----------|----------|------|----------------------------------------------------------------------------------------------------------------------------------------------------------------------------------------------------------------------------------------------------------------------------------------------------------------------------------------------|
|                                       |          |          |          |          |          |      | && PF00254:FKBP-type peptidyl-prolyl cis-trans isomerase                                                                                                                                                                                                                                                                                     |
| Lachesis_group0__13_contigs__l.g2257  | 742.1595 | 228.7213 | 1.69944  | 0.000484 | 0.0055   | 2394 | - && Q4P5U4.2 RecName: Full=ATP-dependent RNA helicase DBP4 && PF00270:DEAD/DEAH box helicase PF13959:Domain of unknown function (DUF4217) PF00271:Helicase conserved C-terminal domain                                                                                                                                                      |
| Lachesis_group0__13_contigs__l.g6674  | 110.8773 | 34.17465 | 1.698824 | 0.002738 | 0.018808 | 1935 | - && - && PF04129:Vps52 / Sac2 family                                                                                                                                                                                                                                                                                                        |
| Lachesis_group0__13_contigs__l.g8696  | 272.2063 | 83.90768 | 1.697312 | 0.000473 | 0.005382 | 1659 | - && P34809.3 RecName: Full=Glycylpeptide N-tetradecanoyltransferase; AltName: Full=Myristoyl-CoA:protein N-myristoyltransferase; Short=NMT; AltName: Full=Peptide N-myristoyltransferase && PF01233:Myristoyl-CoA:protein N-myristoyltransferase, N-terminal domain PF02799:Myristoyl-CoA:protein N-myristoyltransferase, C-terminal domain |
| Lachesis_group0__13_contigs__l.g136   | 10339.28 | 3193.306 | 1.695015 | 0.000341 | 0.004226 | 1302 | - && - && PF12937:F-box-like                                                                                                                                                                                                                                                                                                                 |
| Lachesis_group0__13_contigs__l.g10438 | 372.9219 | 115.2605 | 1.694317 | 0.003883 | 0.024048 | 1665 | - && O74187.1 RecName: Full=Aldehyde dehydrogenase; Short=ALDDH; Short=ALDH && PF00171:Aldehyde dehydrogenase family                                                                                                                                                                                                                         |
| Lachesis_group0__13_contigs__l.g9814  | 821.2003 | 254.2661 | 1.692916 | 0.000875 | 0.00841  | 1032 | - && A8N6B4.1 RecName: Full=Very-long-chain 3-oxoacyl-CoA reductase; AltName: Full=3-ketoacyl-CoA reductase; Short=3-ketoreductase; Short=KAR; AltName: Full=Microsomal beta-keto-reductase && PF00106:short chain dehydrogenase                                                                                                             |
| Lachesis_group0__13_contigs__l.g9876  | 1099.264 | 340.5128 | 1.690997 | 0.00097  | 0.009066 | 1125 | - && - && PF01040:UbiA prenyltransferase family                                                                                                                                                                                                                                                                                              |

|                                       |          |          |          |          |          |      |                                                                                                                                                                                                                                                                                                         |
|---------------------------------------|----------|----------|----------|----------|----------|------|---------------------------------------------------------------------------------------------------------------------------------------------------------------------------------------------------------------------------------------------------------------------------------------------------------|
| Lachesis_group0__13_contigs__l.g2072  | 1020.933 | 316.4513 | 1.690253 | 0.000431 | 0.00503  | 879  | - && Q5BC69.1 RecName: Full=Pre-mRNA-splicing factor syf2 && PF08231:SYF2 splicing factor                                                                                                                                                                                                               |
| Lachesis_group0__13_contigs__l.g7313  | 1060.55  | 328.9333 | 1.689259 | 0.000603 | 0.006366 | 2718 | - && O43051.1 RecName: Full=Probable nucleolar complex protein 14 && PF04147:Nop14-like family                                                                                                                                                                                                          |
| Lachesis_group0__13_contigs__l.g7729  | 217.9637 | 67.55656 | 1.687976 | 0.004518 | 0.026829 | 1071 | - && G3XMC6.1 RecName: Full=Dehydrogenase azaJ; AltName: Full=Azaphilone biosynthesis cluster protein azaJ && PF08240:Alcohol dehydrogenase GroES-like domain PF00107:Zinc-binding dehydrogenase                                                                                                        |
| Lachesis_group0__13_contigs__l.g11334 | 2726.519 | 846.4598 | 1.687949 | 0.000371 | 0.004503 | 1569 | - && O14007.1 RecName: Full=H/ACA ribonucleoprotein complex subunit 4; AltName: Full=Centromere-binding factor 5 homolog && PF08068:DKCLD (NUC011) domain PF01472:PUA domain PF16198:tRNA pseudouridylate synthase B C-terminal domain PF01509:TruB family pseudouridylate synthase (N terminal domain) |
| Lachesis_group0__13_contigs__l.g9953  | 2448.48  | 761.5227 | 1.684869 | 0.000242 | 0.003312 | 1542 | - && Q5AR55.1 RecName: Full=Cytochrome P450 monooxygenase asqL; AltName: Full=4'-methoxyviridicatin/aspoquinolone biosynthesis cluster protein asqL; AltName: Full=Aspoquinolone biosynthesis protein L && PF00067:Cytochrome P450                                                                      |
| Lachesis_group0__13_contigs__l.g6508  | 936.7787 | 291.5621 | 1.684363 | 0.001923 | 0.014702 | 468  | - && Q8K933.1 RecName: Full=Single-stranded DNA-binding protein; Short=SSB && PF00436:Single-strand binding protein family                                                                                                                                                                              |
| Lachesis_group0__13_contigs__l.g3422  | 1694.983 | 527.7308 | 1.683956 | 0.000598 | 0.006327 | 1098 | - && P78605.1 RecName: Full=Ornithine carbamoyltransferase, mitochondrial; AltName: Full=Ornithine transcarbamylase; Short=OTCase;                                                                                                                                                                      |

|                                       |          |          |          |          |          |      |                                                                                                                                                                                                                                                                                                                                                                                                                                                                                               |
|---------------------------------------|----------|----------|----------|----------|----------|------|-----------------------------------------------------------------------------------------------------------------------------------------------------------------------------------------------------------------------------------------------------------------------------------------------------------------------------------------------------------------------------------------------------------------------------------------------------------------------------------------------|
|                                       |          |          |          |          |          |      | Flags: Precursor [Trametes hirsuta] && PF02729:Aspartate/ornithine carbamoyltransferase, carbamoyl-P binding domain PF00185:Aspartate/ornithine carbamoyltransferase, Asp/Orn binding domain                                                                                                                                                                                                                                                                                                  |
| Lachesis_group0__13_contigs__l.g1936  | 1901.293 | 591.9322 | 1.683895 | 0.000349 | 0.004291 | 1920 | - && Q4P7G1.1 RecName: Full=Eukaryotic translation initiation factor 3 subunit G; Short=eIF3g; AltName: Full=Eukaryotic translation initiation factor 3 RNA-binding subunit; Short=eIF-3 RNA-binding subunit; AltName: Full=Translation initiation factor eIF3 p33 subunit homolog; Short=eIF3 p33 homolog && PF00076:RNA recognition motif. (a.k.a. RRM, RBD, or RNP domain) PF12353:Eukaryotic translation initiation factor 3 subunit G PF01370:NAD dependent epimerase/dehydratase family |
| Lachesis_group0__13_contigs__l.g10005 | 71.87706 | 22.34431 | 1.682541 | 0.007403 | 0.038296 | 882  | - && - && PF12695:Alpha/beta hydrolase family                                                                                                                                                                                                                                                                                                                                                                                                                                                 |
| Lachesis_group0__13_contigs__l.g9329  | 206.7925 | 64.46382 | 1.682472 | 0.009899 | 0.046904 | 1620 | - && Q9UT75.1 RecName: Full=tRNA dimethylallyltransferase, mitochondrial; AltName: Full=Isopentenyl-diphosphate: tRNA isopentenyltransferase; Short=IPP transferase; Short=IPPT; AltName: Full=tRNA isopentenyltransferase; Short=IPTase && PF01715:IPP transferase                                                                                                                                                                                                                           |
| Lachesis_group0__13_contigs__l.g732   | 654.6615 | 204.3294 | 1.680658 | 0.000323 | 0.004078 | 4482 | - && Q10264.3 RecName: Full=DNA cross-link repair protein pso2/snm1 && PF07522:DNA repair metallo-beta-lactamase                                                                                                                                                                                                                                                                                                                                                                              |

|                                       |          |          |          |          |          |      |                                                                                                                                                                                                                                                                                                                                          |
|---------------------------------------|----------|----------|----------|----------|----------|------|------------------------------------------------------------------------------------------------------------------------------------------------------------------------------------------------------------------------------------------------------------------------------------------------------------------------------------------|
| Lachesis_group0__13_contigs__l.g8593  | 3773.505 | 1178.191 | 1.679576 | 0.000695 | 0.007101 | 978  | - && P35551.1 RecName: Full=rRNA 2'-O-methyltransferase fibrillarin; AltName: Full=Histone-glutamine methyltransferase && PF01269:Fibrillarin                                                                                                                                                                                            |
| Lachesis_group0__13_contigs__l.g7746  | 241.5505 | 75.55186 | 1.679285 | 0.002934 | 0.019684 | 843  | - && - && PF04000:Sas10/Utp3/C1D family                                                                                                                                                                                                                                                                                                  |
| Lachesis_group0__13_contigs__l.g9485  | 336.5963 | 104.9456 | 1.679194 | 0.006323 | 0.034179 | 720  | - && - && PF02410:Ribosomal silencing factor during starvation                                                                                                                                                                                                                                                                           |
| Lachesis_group0__13_contigs__l.g5895  | 120.7316 | 37.80872 | 1.677202 | 0.006472 | 0.034658 | 798  | - && - && PF05018:Protein of unknown function (DUF667)                                                                                                                                                                                                                                                                                   |
| Lachesis_group0__13_contigs__l.g4120  | 107.7751 | 33.75117 | 1.676037 | 0.002908 | 0.01963  | 681  | - && Q8R040.2 RecName: Full=Ribonuclease P protein subunit p21; Short=RNaseP protein p21; AltName: Full=Ribonucleoprotein V && PF04032:RNase P Rpr2/Rpp21/SNM1 subunit domain                                                                                                                                                            |
| Lachesis_group0__13_contigs__l.g3985  | 1423.426 | 446.2449 | 1.673878 | 0.000956 | 0.008972 | 1209 | - && - && PF09729:Gti1/Pac2 family                                                                                                                                                                                                                                                                                                       |
| Lachesis_group0__13_contigs__l.g4233  | 285.8216 | 89.85785 | 1.671456 | 0.001902 | 0.014595 | 1113 | - && - && PF06220:U1 zinc finger                                                                                                                                                                                                                                                                                                         |
| Lachesis_group0__13_contigs__l.g6814  | 647.7899 | 203.6132 | 1.670339 | 0.000617 | 0.006458 | 1560 | - && Q9FG01.1 RecName: Full=Splicing factor SF3a60 homolog; AltName: Full=Protein ATROPOS; AltName: Full=Splicing factor ATO && PF16837:Pre-mRNA-splicing factor SF3A3, of SF3a complex, Prp9 PF11931:Domain of unknown function (DUF3449) PF12171:Zinc-finger double-stranded RNA-binding PF12108:Splicing factor SF3a60 binding domain |
| Lachesis_group0__13_contigs__l.g11521 | 130.6107 | 40.98282 | 1.66738  | 0.007309 | 0.038006 | 4284 | - && - && PF08317:Spc7 kinetochore protein PF15577:Spc7_C2                                                                                                                                                                                                                                                                               |
| Lachesis_group0__13_contigs__l.g1552  | 256.9589 | 81.21261 | 1.663644 | 0.000993 | 0.009224 | 993  | - && Q6K9N1.1 RecName: Full=Casein kinase 1; Short=OsCKI1; AltName: Full=Protein HYBRID                                                                                                                                                                                                                                                  |



|                                       |          |          |          |          |          |      |                                                                                                                                                                                                                                                                                     |
|---------------------------------------|----------|----------|----------|----------|----------|------|-------------------------------------------------------------------------------------------------------------------------------------------------------------------------------------------------------------------------------------------------------------------------------------|
|                                       |          |          |          |          |          |      | BREAKDOWN 2; AltName: Full=Protein LOW TEMPERATURE GROWTH 1 && PF00069:Protein kinase domain                                                                                                                                                                                        |
| Lachesis_group0__13_contigs__l.g5292  | 734.8448 | 232.4059 | 1.661486 | 0.001405 | 0.011644 | 1389 | - && Q6NUA1.1 RecName: Full=Protein arginine N-methyltransferase 5; AltName: Full=Histone synthetic lethal 7 protein; Short=Hsl7; AltName: Full=Histone-arginine N-methyltransferase PRMT5 && PF05185:PRMT5 arginine-N-methyltransferase                                            |
| Lachesis_group0__13_contigs__l.g8482  | 102.6521 | 32.48351 | 1.660456 | 0.006173 | 0.033595 | 468  | - && Q8R344.2 RecName: Full=Coiled-coil domain-containing protein 12 && PF08315:cwf18 pre-mRNA splicing factor                                                                                                                                                                      |
| Lachesis_group0__13_contigs__l.g11479 | 1245.823 | 394.3784 | 1.659891 | 0.000437 | 0.005091 | 1512 | - && O22785.3 RecName: Full=Pre-mRNA-processing factor 19 homolog 2; AltName: Full=MOS4-associated complex protein 3B; Short=MAC protein 3B; AltName: Full=Plant U-box protein 60; AltName: Full=U-box domain-containing protein 60 && PF04564:U-box domain PF08606:Prp19/Pso4-like |
| Lachesis_group0__13_contigs__l.g8484  | 255.8246 | 81.41238 | 1.653717 | 0.001359 | 0.0114   | 963  | - && - && PF06881:RNA polymerase II transcription factor SIII (Elongin) subunit A                                                                                                                                                                                                   |
| Lachesis_group0__13_contigs__l.g2649  | 429.537  | 136.6848 | 1.652503 | 0.001524 | 0.012345 | 1830 | - && O14059.1 RecName: Full=Probable histidinol-phosphatase; Short=HolPase && PF00111:2Fe-2S iron-sulfur cluster binding domain PF02811:PHP domain                                                                                                                                  |
| Lachesis_group0__13_contigs__l.g9168  | 1232.346 | 392.6969 | 1.650401 | 0.000442 | 0.005122 | 927  | - && Q9USM4.1 RecName: Full=U1 snRNP-associated protein usp106; AltName: Full=Protein luc7 && PF03194:LUC7 N_terminus                                                                                                                                                               |

|                                       |          |          |          |          |          |      |                                                                                                                                                                                                                            |
|---------------------------------------|----------|----------|----------|----------|----------|------|----------------------------------------------------------------------------------------------------------------------------------------------------------------------------------------------------------------------------|
| Lachesis_group0__13_contigs__l.g11045 | 978.6273 | 312.3375 | 1.648561 | 0.000606 | 0.006377 | 3510 | - && Q1MTQ9.1 RecName: Full=60S ribosome subunit biogenesis protein nip7 && PF08314:Secretory pathway protein Sec39 PF03657:Uncharacterised protein family (UPF0113)                                                       |
| Lachesis_group0__13_contigs__l.g1729  | 2428.733 | 775.1295 | 1.647972 | 0.000618 | 0.00647  | 2592 | - && O13864.1 RecName: Full=Importin subunit beta-1; AltName: Full=Importin-95; AltName: Full=Karyopherin subunit beta-1; AltName: Full=Karyopherin-95 && PF13513:HEAT-like repeat PF03810:Importin-beta N-terminal domain |
| Lachesis_group0__13_contigs__l.g10606 | 871.4651 | 278.4885 | 1.646411 | 0.000169 | 0.002583 | 996  | - && - && PF08690:GET complex subunit GET2                                                                                                                                                                                 |
| Lachesis_group0__13_contigs__l.g10060 | 975.9093 | 312.0976 | 1.645667 | 0.000213 | 0.003068 | 720  | - && - && PF00240:Ubiquitin family PF02179:BAG domain                                                                                                                                                                      |
| Lachesis_group0__13_contigs__l.g3642  | 1457.163 | 465.8408 | 1.64501  | 0.001361 | 0.011408 | 1053 | - && - && PF00153:Mitochondrial carrier protein                                                                                                                                                                            |
| Lachesis_group0__13_contigs__l.g9583  | 200.3492 | 64.08196 | 1.644257 | 0.000527 | 0.0058   | 1017 | - && A8WFS8.1 RecName: Full=Post-GPI attachment to proteins factor 3; AltName: Full=PER1-like domain-containing protein 1; Flags: Precursor && PF04080:Per1-like                                                           |
| Lachesis_group0__13_contigs__l.g5333  | 403.6899 | 129.4485 | 1.641319 | 0.00203  | 0.015266 | 2001 | - && Q9UUF2.1 RecName: Full=Probable methionine--tRNA ligase, cytoplasmic; AltName: Full=Methionyl-tRNA synthetase; Short=MetRS && PF09334:tRNA synthetases class I (M) PF00458:WHEP-TRS domain                            |
| Lachesis_group0__13_contigs__l.g6344  | 920.6581 | 296.3433 | 1.63618  | 0.000801 | 0.007867 | 552  | - && Q9P7H0.1 RecName: Full=H/ACA ribonucleoprotein complex subunit 2; AltName: Full=H/ACA snoRNP protein NHP2; AltName: Full=High mobility group-like nuclear protein 2;                                                  |

|                                       |          |          |          |          |          |      |                                                                                                                                                                                                                                                             |
|---------------------------------------|----------|----------|----------|----------|----------|------|-------------------------------------------------------------------------------------------------------------------------------------------------------------------------------------------------------------------------------------------------------------|
|                                       |          |          |          |          |          |      | AltName: Full=P17-nhp2 && PF01248:Ribosomal protein L7Ae/L30e/S12e/Gadd45 family                                                                                                                                                                            |
| Lachesis_group0__13_contigs__l.g5410  | 155.9781 | 49.99613 | 1.635681 | 0.004856 | 0.028391 | 573  | - && - && PF11705:DNA-directed RNA polymerase III subunit Rpc31                                                                                                                                                                                             |
| Lachesis_group0__13_contigs__l.g11438 | 232.0569 | 74.77379 | 1.634694 | 0.003524 | 0.022533 | 354  | - && A1DH48.1 RecName: Full=V-type proton ATPase subunit F; Short=V-ATPase subunit F; AltName: Full=V-ATPase 14 kDa subunit; AltName: Full=Vacuolar proton pump subunit F && PF01990:ATP synthase (F/14-kDa) subunit                                        |
| Lachesis_group0__13_contigs__l.g8189  | 6564.424 | 2114.755 | 1.634191 | 0.002552 | 0.017889 | 1266 | - && - && PF10294:Lysine methyltransferase                                                                                                                                                                                                                  |
| Lachesis_group0__13_contigs__l.g5228  | 865.3044 | 280.0539 | 1.628671 | 0.00108  | 0.009782 | 3360 | - && Q5C9Z4.1 RecName: Full=Nucleolar MIF4G domain-containing protein 1; AltName: Full=SGD1 homolog && PF02854:MIF4G domain PF02847:MA3 domain                                                                                                              |
| Lachesis_group0__13_contigs__l.g8859  | 554.4389 | 179.4164 | 1.627667 | 0.001016 | 0.009388 | 1593 | - && P0CR91.1 RecName: Full=Mitochondrial import inner membrane translocase subunit TIM54 >P0CR90.1 RecName: Full=Mitochondrial import inner membrane translocase subunit TIM54 && PF11711:Inner membrane protein import complex subunit Tim54              |
| Lachesis_group0__13_contigs__l.g9222  | 468.3667 | 152.0586 | 1.623932 | 0.001028 | 0.009457 | 2100 | - && Q9UTN3.2 RecName: Full=Poly(A) RNA polymerase cid14; Short=PAP; AltName: Full=Caffeine-induced death protein 14; AltName: Full=Polynucleotide adenylyltransferase cid14 && PF03828:Cid1 family poly A polymerase PF01909:Nucleotidyltransferase domain |

|                                       |          |          |          |          |          |      |                                                                                                                                                                                         |
|---------------------------------------|----------|----------|----------|----------|----------|------|-----------------------------------------------------------------------------------------------------------------------------------------------------------------------------------------|
| Lachesis_group0__13_contigs__l.g6367  | 1146.641 | 372.2692 | 1.623606 | 0.000798 | 0.007854 | 1989 | - && F4I2J8.1 RecName: Full=Cactin && PF09732:Cactus-binding C-terminus of cactin protein PF10312:Conserved mid region of cactin                                                        |
| Lachesis_group0__13_contigs__l.g2375  | 2356.299 | 766.1169 | 1.621255 | 0.000935 | 0.008827 | 1932 | - && O42644.1 RecName: Full=CTP synthase; AltName: Full=CTP synthetase; AltName: Full=UTP--ammonia ligase && PF06418:CTP synthase N-terminus PF00117:Glutamine amidotransferase class-I |
| Lachesis_group0__13_contigs__l.g7233  | 305.8842 | 99.3185  | 1.620727 | 0.006677 | 0.035476 | 477  | - && Q9UTI3.1 RecName: Full=N-terminal acetyltransferase A complex catalytic subunit ard1; Short=NatA complex subunit ARD1 && PF00583:Acetyltransferase (GNAT) family                   |
| Lachesis_group0__13_contigs__l.g3664  | 1320.196 | 430.7264 | 1.615869 | 0.000579 | 0.006202 | 1077 | - && Q92368.1 RecName: Full=Cell differentiation protein rcd1 && PF04078:Cell differentiation family, Rcd1-like                                                                         |
| Lachesis_group0__13_contigs__l.g8703  | 966.6281 | 315.2794 | 1.615845 | 0.003562 | 0.0227   | 972  | - && O14027.1 RecName: Full=Probable pyridoxal 5'-phosphate synthase subunit PDX1; Short=PLP synthase subunit PDX1 && PF01680:SOR/SNZ family                                            |
| Lachesis_group0__13_contigs__l.g11194 | 887.7728 | 290.2686 | 1.613399 | 0.004952 | 0.028708 | 2298 | - && O13910.1 RecName: Full=U3 small nucleolar ribonucleoprotein protein mpp10 && PF04006:Mpp10 protein                                                                                 |
| Lachesis_group0__13_contigs__l.g5840  | 329.5223 | 107.5886 | 1.613129 | 0.001501 | 0.012223 | 4677 | - && Q94BM7.1 RecName: Full=Protein SPA1-RELATED 4 && PF00400:WD domain, G-beta repeat PF05729:NACHT domain PF00168:C2 domain                                                           |

|                                      |          |          |          |          |          |      |                                                                                                                                                                                                                                                           |
|--------------------------------------|----------|----------|----------|----------|----------|------|-----------------------------------------------------------------------------------------------------------------------------------------------------------------------------------------------------------------------------------------------------------|
| Lachesis_group0__13_contigs__l.g9041 | 334.8341 | 109.7949 | 1.611236 | 0.001207 | 0.010484 | 516  | - && O94153.1 RecName: Full=Imidazoleglycerol-phosphate dehydratase; Short=IGPD && PF00475:Imidazoleglycerol-phosphate dehydratase                                                                                                                        |
| Lachesis_group0__13_contigs__l.g9026 | 1218.585 | 399.164  | 1.61107  | 0.00192  | 0.014691 | 3831 | - && O74490.1 RecName: Full=Vacuolar protein sorting-associated protein ist1 && PF03398:Regulator of Vps4 activity in the MVB pathway PF00566:Rab-GTPase-TBC domain                                                                                       |
| Lachesis_group0__13_contigs__l.g9624 | 483.5856 | 158.5626 | 1.610174 | 0.001663 | 0.013113 | 1380 | - && - && PF07690:Major Facilitator Superfamily                                                                                                                                                                                                           |
| novel.808                            | 73.93977 | 24.27981 | 1.607838 | 0.009857 | 0.046827 | 370  | - && P0CM71.1 RecName: Full=Cytochrome c oxidase-assembly factor COX23, mitochondrial; Flags: Precursor >P0CM70.1 RecName: Full=Cytochrome c oxidase-assembly factor COX23, mitochondrial; Flags: Precursor && PF08991:Mature-T-Cell Proliferation I type |
| Lachesis_group0__13_contigs__l.g377  | 1376.454 | 451.8667 | 1.606998 | 0.003364 | 0.021772 | 1059 | - && Q54KL5.1 RecName: Full=WD repeat-containing protein 5 homolog && PF00400:WD domain, G-beta repeat                                                                                                                                                    |
| Lachesis_group0__13_contigs__l.g3560 | 1747.732 | 574.0572 | 1.606949 | 0.004541 | 0.026921 | 615  | - && Q7T3C6.1 RecName: Full=Cleavage and polyadenylation specificity factor subunit 5 && PF13869:Nucleotide hydrolase                                                                                                                                     |
| Lachesis_group0__13_contigs__l.g5273 | 1925.796 | 632.4938 | 1.606415 | 0.00029  | 0.003786 | 2817 | - && P73177.1 RecName: Full=Uncharacterized ribonuclease sl1290 && PF00773:RNB domain                                                                                                                                                                     |
| Lachesis_group0__13_contigs__l.g9606 | 201.4129 | 66.17409 | 1.605786 | 0.008532 | 0.042511 | 810  | - && Q9Y7L1.2 RecName: Full=Phosducin-like protein C2A9.09 && PF02114:Phosducin                                                                                                                                                                           |
| Lachesis_group0__13_contigs__l.g4862 | 168.7012 | 55.49008 | 1.604737 | 0.007344 | 0.038127 | 966  | - && P74369.1 RecName: Full=UPF0014 membrane protein slr1647 && PF03649:Uncharacterised protein family (UPF0014)                                                                                                                                          |

|                                       |          |          |          |          |          |      |                                                                                                                                                                                                                                                                                                                                                                                                                                                   |
|---------------------------------------|----------|----------|----------|----------|----------|------|---------------------------------------------------------------------------------------------------------------------------------------------------------------------------------------------------------------------------------------------------------------------------------------------------------------------------------------------------------------------------------------------------------------------------------------------------|
| Lachesis_group0__13_contigs__l.g4701  | 384.175  | 126.3256 | 1.603814 | 0.000755 | 0.00751  | 2019 | - && P0CS09.1 RecName: Full=tRNA (adenine(58)-N(1))-methyltransferase catalytic subunit TRM61; AltName: Full=tRNA(m1A58)-methyltransferase subunit TRM61; Short=tRNA(m1A58)MTase subunit TRM61 >P0CS08.1 RecName: Full=tRNA (adenine(58)-N(1))-methyltransferase catalytic subunit TRM61; AltName: Full=tRNA(m1A58)-methyltransferase subunit TRM61; Short=tRNA(m1A58)MTase subunit TRM61 && PF08704:tRNA methyltransferase complex GCD14 subunit |
| Lachesis_group0__13_contigs__l.g5906  | 1192.904 | 392.7651 | 1.60341  | 0.002523 | 0.01774  | 834  | - && - && PF05817:Oligosaccharyltransferase subunit Ribophorin II                                                                                                                                                                                                                                                                                                                                                                                 |
| Lachesis_group0__13_contigs__l.g3875  | 3049.31  | 1003.807 | 1.603145 | 0.000508 | 0.005674 | 891  | - && P38988.1 RecName: Full=Mitochondrial GTP/GDP carrier protein 1 && PF00153:Mitochondrial carrier protein                                                                                                                                                                                                                                                                                                                                      |
| Lachesis_group0__13_contigs__l.g4316  | 163.6717 | 53.78164 | 1.602658 | 0.004328 | 0.026067 | 5580 | - && - && PF02902:Ulp1 protease family, C-terminal catalytic domain                                                                                                                                                                                                                                                                                                                                                                               |
| Lachesis_group0__13_contigs__l.g251   | 478.2239 | 157.5426 | 1.602513 | 0.002189 | 0.016056 | 546  | - && O60171.1 RecName: Full=Transcription initiation factor TFIID subunit 10; AltName: Full=TBP-associated factor 10 && PF03540:Transcription initiation factor TFIID 23-30kDa subunit                                                                                                                                                                                                                                                            |
| Lachesis_group0__13_contigs__l.g11483 | 832.5134 | 274.3722 | 1.602419 | 0.00164  | 0.012979 | 3534 | - && Q8L638.1 RecName: Full=Dol-P-Glc:Glc(2)Man(9)GlcNAc(2)-PP-Dol alpha-1,2-glucosyltransferase; AltName: Full=Alpha-1,2-glucosyltransferase ALG10 homolog; AltName:                                                                                                                                                                                                                                                                             |

|                                       |          |          |          |          |          |      |                                                                                                                                                                                             |
|---------------------------------------|----------|----------|----------|----------|----------|------|---------------------------------------------------------------------------------------------------------------------------------------------------------------------------------------------|
|                                       |          |          |          |          |          |      | Full=Protein HOMOLOG OF YEAST ALG10 && PF04922:DIE2/ALG10 family                                                                                                                            |
| Lachesis_group0__13_contigs__l.g8737  | 873.2607 | 287.7848 | 1.601968 | 0.003657 | 0.023131 | 3054 | - && Q9URY8.1 RecName: Full=Probable sulfate permease C869.05c && PF00916:Sulfate permease family PF01740:STAS domain                                                                       |
| Lachesis_group0__13_contigs__l.g10558 | 412.2658 | 136.0365 | 1.601958 | 0.008067 | 0.040843 | 747  | - && - && PF13409:Glutathione S-transferase, N-terminal domain                                                                                                                              |
| Lachesis_group0__13_contigs__l.g5090  | 1039.402 | 343.7267 | 1.59608  | 0.000127 | 0.002123 | 915  | - && O94511.1 RecName: Full=Putative enoyl reductase C646.07c && PF02544:3-oxo-5-alpha-steroid 4-dehydrogenase                                                                              |
| Lachesis_group0__13_contigs__l.g9367  | 511.7513 | 169.5534 | 1.593863 | 0.002228 | 0.016244 | 1314 | - && Q8BVE3.1 RecName: Full=V-type proton ATPase subunit H; Short=V-ATPase subunit H; AltName: Full=Vacuolar proton pump subunit H && PF03224:V-ATPase subunit H PF11698:V-ATPase subunit H |
| Lachesis_group0__13_contigs__l.g9677  | 5150.03  | 1706.824 | 1.593457 | 0.001976 | 0.014961 | 1839 | - && O74965.1 RecName: Full=Eukaryotic translation initiation factor 2A; Short=eIF-2A && PF08662:Eukaryotic translation initiation factor eIF2A                                             |
| Lachesis_group0__13_contigs__l.g11050 | 697.49   | 231.3445 | 1.593038 | 0.000404 | 0.004797 | 1614 | - && O14156.2 RecName: Full=Protein phosphatase 2C homolog 4; Short=PP2C-4 && PF00481:Protein phosphatase 2C                                                                                |
| Lachesis_group0__13_contigs__l.g249   | 2063.76  | 684.2843 | 1.59294  | 0.001125 | 0.010043 | 669  | - && O13917.1 RecName: Full=Hypoxanthine-guanine phosphoribosyltransferase; Short=HGPRT; Short=HGPRTase && -                                                                                |
| Lachesis_group0__13_contigs__l.g10179 | 187.0603 | 62.04667 | 1.58981  | 0.008639 | 0.042825 | 3297 | - && Q82IY3.1 RecName: Full=Pentalenene oxygenase && PF00067:Cytochrome P450                                                                                                                |

|                                       |          |          |          |          |          |      |                                                                                                                                                                                                                                                             |
|---------------------------------------|----------|----------|----------|----------|----------|------|-------------------------------------------------------------------------------------------------------------------------------------------------------------------------------------------------------------------------------------------------------------|
| Lachesis_group0__13_contigs__l.g10264 | 964.1552 | 320.527  | 1.589414 | 0.001152 | 0.01017  | 1050 | - && P25605.2 RecName: Full=Acetolactate synthase small subunit, mitochondrial; AltName: Full=Acetohydroxy-acid synthase small subunit; Short=AHAS; Short=ALS; Flags: Precursor && PF10369:Small subunit of acetolactate synthase PF01842:ACT domain        |
| Lachesis_group0__13_contigs__l.g4114  | 232.3907 | 77.50275 | 1.586245 | 0.007291 | 0.037983 | 1482 | - && Q10475.1 RecName: Full=Eukaryotic translation initiation factor 4 gamma; Short=eIF-4-gamma; Short=eIF-4G && PF02854:MIF4G domain PF12152:Eukaryotic translation initiation factor 4G1                                                                  |
| Lachesis_group0__13_contigs__l.g10328 | 857.0059 | 285.7596 | 1.585277 | 0.000267 | 0.003573 | 2832 | - && P53973.1 RecName: Full=Histone deacetylase HDA1 && PF00850:Histone deacetylase domain PF09757:Arb2 domain PF01201:Ribosomal protein S8e                                                                                                                |
| Lachesis_group0__13_contigs__l.g9267  | 410.0242 | 137.048  | 1.582596 | 0.000546 | 0.005955 | 2049 | - && Q9H5Z1.2 RecName: Full=Probable ATP-dependent RNA helicase DHX35; AltName: Full=DEAH box protein 35 && PF07717:Oligonucleotide/oligosaccharide-binding (OB)-fold PF00271:Helicase conserved C-terminal domain PF04408:Helicase associated domain (HA2) |
| Lachesis_group0__13_contigs__l.g252   | 399.0875 | 133.2546 | 1.581356 | 0.00217  | 0.015959 | 1122 | - && A0A024SMV2.1 RecName: Full=D-xylose 1-dehydrogenase (NADP(+)); Short=XDH; AltName: Full=D-xylose-NADP dehydrogenase; AltName: Full=NADP(+)-dependent D-xylose dehydrogenase && PF01408:Oxidoreductase family, NAD-binding Rossmann fold                |



|                                       |          |          |          |          |          |      |                                                                                                                                                                                                                                                                                                    |
|---------------------------------------|----------|----------|----------|----------|----------|------|----------------------------------------------------------------------------------------------------------------------------------------------------------------------------------------------------------------------------------------------------------------------------------------------------|
| Lachesis_group0__13_contigs__l.g10126 | 2901.622 | 972.3914 | 1.577293 | 0.000486 | 0.005513 | 1332 | - && Q6C9Y4.1 RecName: Full=Carbamoyl-phosphate synthase arginine-specific small chain; Short=CPS-A; AltName: Full=Arginine-specific carbamoyl-phosphate synthetase, glutamine chain && PF00117:Glutamine amidotransferase class-I PF00988:Carbamoyl-phosphate synthase small chain, CPSase domain |
| Lachesis_group0__13_contigs__l.g11571 | 930.1456 | 312.1912 | 1.575611 | 0.001988 | 0.015041 | 873  | - && P78603.2 RecName: Full=Vesicular-fusion protein SEC17 && PF14938:Soluble NSF attachment protein, SNAP                                                                                                                                                                                         |
| Lachesis_group0__13_contigs__l.g5821  | 410.4887 | 137.8287 | 1.574878 | 0.004823 | 0.028229 | 669  | - && Q9P6N2.1 RecName: Full=Pdp3-interacting factor 1 && PF12710:haloacid dehalogenase-like hydrolase                                                                                                                                                                                              |
| Lachesis_group0__13_contigs__l.g403   | 464.696  | 156.1934 | 1.573487 | 0.003717 | 0.023358 | 3453 | - && P38360.2 RecName: Full=P-type cation-transporting ATPase; AltName: Full=Cadmium resistance protein 2; AltName: Full=Cadmium-translocating P-type ATPase; AltName: Full=Cd(2+)-exporting ATPase && PF00122:E1-E2 ATPase PF00702:haloacid dehalogenase-like hydrolase                           |
| Lachesis_group0__13_contigs__l.g2106  | 1591.387 | 536.1457 | 1.569997 | 0.001382 | 0.011516 | 1431 | - && Q9UUI4.1 RecName: Full=Uncharacterized protein C22F8.09 && PF07767:Nop53 (60S ribosomal biogenesis)                                                                                                                                                                                           |
| Lachesis_group0__13_contigs__l.g11395 | 2161.117 | 728.5012 | 1.568732 | 0.005184 | 0.029691 | 1200 | - && O13940.1 RecName: Full=Probable low-specificity L-threonine aldolase && PF01212:Beta-eliminating lyase                                                                                                                                                                                        |

|                                       |          |          |          |          |          |      |                                                                                                                                                                                                                                                                                                                   |
|---------------------------------------|----------|----------|----------|----------|----------|------|-------------------------------------------------------------------------------------------------------------------------------------------------------------------------------------------------------------------------------------------------------------------------------------------------------------------|
| Lachesis_group0__13_contigs__l.g152   | 351.3786 | 118.7302 | 1.568268 | 0.002992 | 0.019975 | 1329 | - && Q08980.1 RecName: Full=Probable transport protein YPL264C && PF00892:EamA-like transporter family                                                                                                                                                                                                            |
| Lachesis_group0__13_contigs__l.g1103  | 679.181  | 229.5241 | 1.565525 | 0.008018 | 0.040631 | 1083 | - && P49349.1 RecName: Full=Farnesyl pyrophosphate synthase; Short=FPP synthase; Short=FPS; AltName: Full=(2E,6E)-farnesyl diphosphate synthase; AltName: Full=Dimethylallyltranstransferase; AltName: Full=Farnesyl diphosphate synthase; AltName: Full=Geranyltranstransferase && PF00348:Polyprenyl synthetase |
| Lachesis_group0__13_contigs__l.g3258  | 548.4974 | 185.5124 | 1.564448 | 0.008117 | 0.041    | 2571 | - && Q74ZS2.2 RecName: Full=GPI ethanolamine phosphate transferase 3; AltName: Full=Glycosylphosphatidylinositol-anchor biosynthesis protein 13 && PF01663:Type I phosphodiesterase / nucleotide pyrophosphatase                                                                                                  |
| Lachesis_group0__13_contigs__l.g9418  | 332.373  | 112.5911 | 1.562914 | 0.00174  | 0.013576 | 2577 | - && Q9P7X5.1 RecName: Full=Protein kinase domain-containing protein ppk32 && PF00069:Protein kinase domain                                                                                                                                                                                                       |
| Lachesis_group0__13_contigs__l.g11652 | 636.7166 | 215.5814 | 1.562558 | 0.000586 | 0.00624  | 504  | - && P36595.1 RecName: Full=DNA-directed RNA polymerases I, II, and III subunit RPABC2; Short=RNA polymerases I, II, and III subunit ABC2; AltName: Full=DNA-directed RNA polymerases I, II, and III 15 kDa polypeptide; AltName: Full=RPC16 && PF01192:RNA polymerase Rpb6                                       |
| Lachesis_group0__13_contigs__l.g4624  | 88.04312 | 29.87128 | 1.55954  | 0.009002 | 0.043933 | 534  | - && O07513.1 RecName: Full=Protein hit && PF01230:HIT domain                                                                                                                                                                                                                                                     |

|                                       |          |          |          |          |          |      |                                                                                                                                                                                                                                                                                 |
|---------------------------------------|----------|----------|----------|----------|----------|------|---------------------------------------------------------------------------------------------------------------------------------------------------------------------------------------------------------------------------------------------------------------------------------|
| Lachesis_group0__13_contigs__l.g9881  | 406.4774 | 137.7223 | 1.559139 | 0.002131 | 0.015779 | 1173 | - && O74995.1 RecName: Full=TFIIH basal transcription factor complex p47 subunit; AltName: Full=Suppressor of stem-loop protein 1 homolog; Short=SSL1 homolog && PF04056:Ssl1-like                                                                                              |
| Lachesis_group0__13_contigs__l.g976   | 1513.682 | 514.3605 | 1.557002 | 0.001678 | 0.013188 | 1311 | - && Q8WU08.2 RecName: Full=Serine/threonine-protein kinase 32A; AltName: Full=Yet another novel kinase 1 && PF00069:Protein kinase domain                                                                                                                                      |
| Lachesis_group0__13_contigs__l.g10296 | 2947.785 | 1002.94  | 1.555572 | 0.000556 | 0.006033 | 2952 | - && Q4P3W3.1 RecName: Full=ATP-dependent RNA helicase DBP10 && PF00270:DEAD/DEAH box helicase PF08147:DBP10CT (NUC160) domain PF00271:Helicase conserved C-terminal domain                                                                                                     |
| Lachesis_group0__13_contigs__l.g7167  | 1388.469 | 472.631  | 1.554873 | 0.000907 | 0.008631 | 1275 | - && Q4WVE5.1 RecName: Full=Survival factor 1 && PF08622:Svf1-like                                                                                                                                                                                                              |
| Lachesis_group0__13_contigs__l.g9847  | 35106.19 | 11958.65 | 1.553675 | 0.001024 | 0.009429 | 2037 | - && A7BHQ9.1 RecName: Full=Tyrosinase; Flags: Precursor && PF00264:Common central domain of tyrosinase                                                                                                                                                                         |
| Lachesis_group0__13_contigs__l.g6694  | 190.3588 | 64.7676  | 1.553383 | 0.008342 | 0.041801 | 768  | - && B4LPP8.1 RecName: Full=Protein crossbronx-like && PF00179:Ubiquitin-conjugating enzyme                                                                                                                                                                                     |
| Lachesis_group0__13_contigs__l.g982   | 695.8929 | 237.6158 | 1.551016 | 0.003722 | 0.023367 | 1245 | - && - && PF05172:Nup53/35/40-type RNA recognition motif                                                                                                                                                                                                                        |
| Lachesis_group0__13_contigs__l.g8681  | 4682.422 | 1600.099 | 1.549225 | 0.000366 | 0.004474 | 2808 | - && Q8WZJ7.1 RecName: Full=C-1-tetrahydrofolate synthase, cytoplasmic; Short=C1-THF synthase; Includes: RecName: Full=Methylenetetrahydrofolate dehydrogenase; Includes: RecName: Full=Methenyltetrahydrofolate cyclohydrolase; Includes: RecName: Full=Formyltetrahydrofolate |

|                                      |          |          |          |          |          |      |                                                                                                                                                                                                                                                                                                                |
|--------------------------------------|----------|----------|----------|----------|----------|------|----------------------------------------------------------------------------------------------------------------------------------------------------------------------------------------------------------------------------------------------------------------------------------------------------------------|
|                                      |          |          |          |          |          |      | synthetase && PF01268:Formate--tetrahydrofolate<br>ligase PF02882:Tetrahydrofolate<br>dehydrogenase/cyclohydrolase, NAD(P)-binding<br>domain PF00763:Tetrahydrofolate<br>dehydrogenase/cyclohydrolase, catalytic domain                                                                                        |
| Lachesis_group0__13_contigs__l.g563  | 996.6448 | 340.651  | 1.549188 | 0.000304 | 0.003896 | 1563 | - && Q52KV5.1 RecName: Full=RNA polymerase-<br>associated protein LEO1 && PF04004:Leo1-like<br>protein                                                                                                                                                                                                         |
| Lachesis_group0__13_contigs__l.g3075 | 317.1304 | 108.3733 | 1.549088 | 0.00236  | 0.01699  | 3054 | - && - && PF00320:GATA zinc finger                                                                                                                                                                                                                                                                             |
| Lachesis_group0__13_contigs__l.g5195 | 371.2629 | 126.8236 | 1.547963 | 0.002016 | 0.015214 | 2784 | - && A7UX13.1 RecName: Full=Hercynylcysteine<br>sulfoxide lyase; AltName: Full=Ergothioneine<br>biosynthesis protein 2; AltName: Full=PLP-binding<br>cysteine desulfurase; AltName: Full=PLP-<br>dependent C-S lyase && PF10288:Cytoplasmic<br>tRNA 2-thiolation protein<br>2 PF00266:Aminotransferase class-V |
| Lachesis_group0__13_contigs__l.g309  | 299.8263 | 102.6457 | 1.546885 | 0.001261 | 0.010829 | 1866 | - && Q6FV05.1 RecName: Full=tRNA<br>pseudouridine synthase 1; AltName: Full=tRNA<br>pseudouridylate synthase 1; AltName: Full=tRNA-<br>uridine isomerase 1 && PF01416:tRNA<br>pseudouridine synthase                                                                                                           |
| Lachesis_group0__13_contigs__l.g9364 | 348.634  | 119.5248 | 1.546457 | 0.009304 | 0.044925 | 1035 | - && Q10480.2 RecName: Full=Nuclease 1,<br>mitochondrial; AltName: Full=SpNUC1; Flags:<br>Precursor && PF01223:DNA/RNA non-specific<br>endonuclease                                                                                                                                                            |
| Lachesis_group0__13_contigs__l.g2710 | 1640.683 | 562.2097 | 1.545241 | 0.000406 | 0.004813 | 3306 | - && Q92540.2 RecName: Full=Protein SMG7;<br>AltName: Full=EST1-like protein C; AltName:<br>Full=SMG-7 homolog; Short=hSMG-7 &&                                                                                                                                                                                |

|                                      |          |          |          |          |          |      |                                                                                                                                                                                                                                                   |
|--------------------------------------|----------|----------|----------|----------|----------|------|---------------------------------------------------------------------------------------------------------------------------------------------------------------------------------------------------------------------------------------------------|
|                                      |          |          |          |          |          |      | PF10373:Est1 DNA/RNA binding domain PF10374:Telomerase activating protein Est1                                                                                                                                                                    |
| Lachesis_group0__13_contigs__l.g6630 | 365.2233 | 125.049  | 1.544803 | 0.002308 | 0.01669  | 924  | - && - && PF10406:Transcription factor TFIID complex subunit 8 C-term PF07524:Bromodomain associated                                                                                                                                              |
| Lachesis_group0__13_contigs__l.g7350 | 239.8861 | 82.30354 | 1.544549 | 0.002098 | 0.015603 | 471  | - && Q12487.1 RecName: Full=54S ribosomal protein L23, mitochondrial; AltName: Full=YmL23; Flags: Precursor && PF00572:Ribosomal protein L13                                                                                                      |
| Lachesis_group0__13_contigs__l.g6692 | 732.2781 | 250.9069 | 1.5442   | 0.003688 | 0.023277 | 3762 | - && Q04656.3 RecName: Full=Copper-transporting ATPase 1; AltName: Full=Copper pump 1; AltName: Full=Menkes disease-associated protein && PF00122:E1-E2 ATPase PF00702:haloacid dehalogenase-like hydrolase PF00403:Heavy-metal-associated domain |
| Lachesis_group0__13_contigs__l.g3663 | 384.6581 | 131.7291 | 1.544    | 0.00977  | 0.04656  | 831  | - && D4AK18.2 RecName: Full=Uncharacterized secreted protein ARB_06907; Flags: Precursor && -                                                                                                                                                     |
| Lachesis_group0__13_contigs__l.g2737 | 311.5944 | 107.1523 | 1.543743 | 0.007307 | 0.038006 | 2064 | - && A8NZY7.1 RecName: Full=tRNA-dihydrouridine(47) synthase [NAD(P)(+)] AltName: Full=tRNA-dihydrouridine synthase 3 && PF01207:Dihydrouridine synthase (Dus)                                                                                    |
| Lachesis_group0__13_contigs__l.g9965 | 448.8509 | 154.0825 | 1.542841 | 0.001186 | 0.010357 | 1008 | - && Q09923.1 RecName: Full=Aldo-keto reductase yakc [NADP(+)] && PF00248:Aldo/keto reductase family                                                                                                                                              |
| Lachesis_group0__13_contigs__l.g2208 | 711.8411 | 244.4641 | 1.542274 | 0.001873 | 0.014419 | 300  | - && Q6Q560.1 RecName: Full=Protein ISD11; AltName: Full=Iron-sulfur protein biogenesis,                                                                                                                                                          |

|                                      |          |          |          |          |          |      |                                                                                                                                                                                                                                                                                                                                                                                         |
|--------------------------------------|----------|----------|----------|----------|----------|------|-----------------------------------------------------------------------------------------------------------------------------------------------------------------------------------------------------------------------------------------------------------------------------------------------------------------------------------------------------------------------------------------|
|                                      |          |          |          |          |          |      | desulfurase-interacting protein 11 &&<br>PF13232:Complex1_LYR-like                                                                                                                                                                                                                                                                                                                      |
| Lachesis_group0__13_contigs__l.g6183 | 820.6325 | 281.9483 | 1.542247 | 0.001431 | 0.011796 | 1503 | - && P0CR27.1 RecName: Full=RuvB-like helicase<br>1 >P0CR26.1 RecName: Full=RuvB-like helicase 1<br>&& PF06068:TIP49 C-terminus                                                                                                                                                                                                                                                         |
| Lachesis_group0__13_contigs__l.g2760 | 1880.913 | 646.0812 | 1.541916 | 0.001392 | 0.011577 | 1041 | - && Q6ING7.1 RecName: Full=FAD synthase;<br>AltName: Full=FAD pyrophosphorylase; AltName:<br>Full=FMN adenylyltransferase; AltName:<br>Full=Flavin adenine dinucleotide synthase;<br>Includes: RecName: Full=Molybdenum cofactor<br>biosynthesis protein-like region; Includes:<br>RecName: Full=FAD synthase region &&<br>PF01507:Phosphoadenosine phosphosulfate<br>reductase family |
| Lachesis_group0__13_contigs__l.g8140 | 343.945  | 118.0372 | 1.541849 | 0.002549 | 0.017876 | 1428 | - && Q10209.1 RecName: Full=Uncharacterized J<br>domain-containing protein C4H3.01 &&<br>PF00226:DnaJ domain PF14308:X-domain of DnaJ-<br>containing                                                                                                                                                                                                                                    |
| Lachesis_group0__13_contigs__l.g8698 | 515.8999 | 177.286  | 1.54164  | 0.002221 | 0.016226 | 1617 | - && P50999.2 RecName: Full=T-complex protein 1<br>subunit delta; Short=TCP-1-delta; AltName:<br>Full=CCT-delta && PF00118:TCP-1/cpn60<br>chaperonin family                                                                                                                                                                                                                             |
| Lachesis_group0__13_contigs__l.g1141 | 613.5137 | 210.9479 | 1.541446 | 0.001004 | 0.009308 | 1890 | - && P0CP42.1 RecName: Full=Oxidation resistance<br>protein 1 && PF07534:TLD                                                                                                                                                                                                                                                                                                            |
| Lachesis_group0__13_contigs__l.g5547 | 8690.369 | 2986.067 | 1.541309 | 0.010748 | 0.049789 | 1065 | - && O14321.1 RecName: Full=Sterol 24-C-<br>methyltransferase erg6; AltName: Full=Delta(24)-<br>sterol C-methyltransferase erg6; AltName:<br>Full=Ergosterol biosynthesis protein 6 &&                                                                                                                                                                                                  |

|                                       |          |          |          |          |          |      |                                                                                                                                                                                                                                                                                                                                                                                                                |
|---------------------------------------|----------|----------|----------|----------|----------|------|----------------------------------------------------------------------------------------------------------------------------------------------------------------------------------------------------------------------------------------------------------------------------------------------------------------------------------------------------------------------------------------------------------------|
|                                       |          |          |          |          |          |      | PF13847:Methyltransferase domain PF08498:Sterol methyltransferase C-terminal                                                                                                                                                                                                                                                                                                                                   |
| Lachesis_group0__13_contigs__l.g9109  | 189.7579 | 65.18199 | 1.539252 | 0.001541 | 0.012402 | 7764 | - && P04323.1 RecName: Full=Retrovirus-related Pol polypeptide from transposon 17.6; Includes: RecName: Full=Protease; Includes: RecName: Full=Reverse transcriptase; Includes: RecName: Full=Endonuclease && PF00078:Reverse transcriptase (RNA-dependent DNA polymerase) PF00385:Chromo (CHRromatin Organisation MODifier) domain PF12862:Anaphase-promoting complex subunit 5 PF00665:Integrase core domain |
| Lachesis_group0__13_contigs__l.g10872 | 249.8156 | 86.05595 | 1.537982 | 0.006973 | 0.03662  | 630  | - && O42881.1 RecName: Full=Acyl-protein thioesterase 1 && PF02230:Phospholipase/Carboxylesterase                                                                                                                                                                                                                                                                                                              |
| Lachesis_group0__13_contigs__l.g4936  | 363.9095 | 125.5084 | 1.536403 | 0.002208 | 0.016162 | 1479 | - && - && PF13634:Nucleoporin FG repeat region                                                                                                                                                                                                                                                                                                                                                                 |
| Lachesis_group0__13_contigs__l.g10267 | 1734.305 | 599.3083 | 1.533274 | 0.000631 | 0.006583 | 3429 | - && Q4P3S3.1 RecName: Full=Histone acetyltransferase ESA1 && PF01853:MOZ/SAS family PF11717:RNA binding activity-knot of a chromodomain                                                                                                                                                                                                                                                                       |
| Lachesis_group0__13_contigs__l.g5259  | 756.2151 | 261.1563 | 1.533254 | 0.007202 | 0.03759  | 972  | - && P40387.2 RecName: Full=Alpha,alpha-trehalose-phosphate synthase [UDP-forming]; AltName: Full=Trehalose-6-phosphate synthase; AltName: Full=UDP-glucose-glucosephosphate glucosyltransferase && PF00982:Glycosyltransferase family 20                                                                                                                                                                      |
| Lachesis_group0__13_contigs__l.g2544  | 1193.889 | 412.5882 | 1.533071 | 0.000828 | 0.008088 | 1911 | - && - && PF01544:CorA-like Mg2+ transporter protein                                                                                                                                                                                                                                                                                                                                                           |

|                                       |          |          |          |          |          |      |                                                                                                                                                                                                                                                                                                                                                                             |
|---------------------------------------|----------|----------|----------|----------|----------|------|-----------------------------------------------------------------------------------------------------------------------------------------------------------------------------------------------------------------------------------------------------------------------------------------------------------------------------------------------------------------------------|
| Lachesis_group0__13_contigs__l.g5592  | 259.3208 | 89.83535 | 1.53122  | 0.003265 | 0.021331 | 339  | - && Q09177.1 RecName: Full=DNA-directed RNA polymerases I and III subunit RPAC2; Short=RNA polymerases I and III subunit AC2; AltName: Full=AC19; AltName: Full=DNA-directed RNA polymerases I and III 14 kDa polypeptide && PF13656:RNA polymerase Rpb3/Rpb11 dimerisation domain                                                                                         |
| Lachesis_group0__13_contigs__l.g9396  | 523.5026 | 181.3533 | 1.53028  | 0.002845 | 0.019334 | 927  | - && P16451.1 RecName: Full=Pyruvate dehydrogenase complex protein X component, mitochondrial; AltName: Full=Dihydrolipoamide dehydrogenase-binding protein of pyruvate dehydrogenase complex; AltName: Full=E3-binding protein; AltName: Full=Pyruvate dehydrogenase complex component E3BP; Flags: Precursor && PF02817:e3 binding domain PF00364:Biotin-requiring enzyme |
| Lachesis_group0__13_contigs__l.g9547  | 636.6397 | 220.6349 | 1.52914  | 0.003699 | 0.023293 | 1863 | - && O13298.1 RecName: Full=Histone deacetylase phd1 && PF00850:Histone deacetylase domain                                                                                                                                                                                                                                                                                  |
| Lachesis_group0__13_contigs__l.g11369 | 8762.088 | 3036.059 | 1.529129 | 0.001137 | 0.010099 | 1920 | - && Q9P7H3.1 RecName: Full=Prohibitin-1 && PF00076:RNA recognition motif. (a.k.a. RRM, RBD, or RNP domain) PF01145:SPFH domain / Band 7 family                                                                                                                                                                                                                             |
| Lachesis_group0__13_contigs__l.g10220 | 389.3244 | 135.1736 | 1.526243 | 0.001425 | 0.011784 | 1284 | - && Q90YA8.1 RecName: Full=Glutaminyl-peptide cyclotransferase; AltName: Full=Glutaminyl cyclase; Short=QC; AltName: Full=Glutaminyl-tRNA cyclotransferase; Flags: Precursor && PF04389:Peptidase family M28                                                                                                                                                               |



|                                       |          |          |          |          |          |      |                                                                                                                                                                                                                                                                       |
|---------------------------------------|----------|----------|----------|----------|----------|------|-----------------------------------------------------------------------------------------------------------------------------------------------------------------------------------------------------------------------------------------------------------------------|
| Lachesis_group0__13_contigs__l.g3533  | 466.9444 | 163.0375 | 1.519274 | 0.002804 | 0.019128 | 906  | - && Q9UTM0.1 RecName: Full=INO80 complex subunit 1 && PF00096:Zinc finger, C2H2 type                                                                                                                                                                                 |
| Lachesis_group0__13_contigs__l.g9096  | 404.0743 | 140.8876 | 1.519201 | 0.002058 | 0.015424 | 894  | - && P38747.1 RecName: Full=OTU domain-containing protein 2 && PF02338:OTU-like cysteine protease                                                                                                                                                                     |
| Lachesis_group0__13_contigs__l.g10098 | 444.7878 | 155.3973 | 1.5189   | 0.002872 | 0.019457 | 1011 | - && P87055.1 RecName: Full=Uncharacterized protein C57A10.07 && -                                                                                                                                                                                                    |
| Lachesis_group0__13_contigs__l.g2025  | 91.34896 | 31.85376 | 1.518777 | 0.008594 | 0.042736 | 1167 | - && Q9LVH5.1 RecName: Full=Outer envelope protein 64, chloroplastic; AltName: Full=Translocon at the outer membrane of chloroplasts 64-III && PF13414:TPR repeat PF07719:Tetratricopeptide repeat PF13877:Potential Monad-binding region of RPAP3                    |
| Lachesis_group0__13_contigs__l.g11453 | 2356.158 | 822.5679 | 1.518705 | 0.006669 | 0.035453 | 876  | - && Q55ED1.1 RecName: Full=Probable nucleosome assembly protein && PF00956:Nucleosome assembly protein (NAP)                                                                                                                                                         |
| Lachesis_group0__13_contigs__l.g2486  | 390.6328 | 136.3447 | 1.517979 | 0.002108 | 0.015667 | 2322 | - && Q9D0N7.1 RecName: Full=Chromatin assembly factor 1 subunit B; Short=CAF-1 subunit B; AltName: Full=Chromatin assembly factor I p60 subunit; Short=CAF-I 60 kDa subunit; Short=CAF-I p60 && -                                                                     |
| Lachesis_group0__13_contigs__l.g4470  | 180.164  | 62.9033  | 1.517383 | 0.003299 | 0.021453 | 3276 | - && Q70LM4.1 RecName: Full=Linear gramicidin synthase subunit D; Includes: RecName: Full=ATP-dependent D-leucine adenylase; Short=D-LeuA; AltName: Full=D-leucine activase; Includes: RecName: Full=Leucine racemase [ATP-hydrolyzing]; Includes: RecName: Full=ATP- |

|                                       |          |          |          |          |          |      |                                                                                                                                                                                                                                                                                                          |
|---------------------------------------|----------|----------|----------|----------|----------|------|----------------------------------------------------------------------------------------------------------------------------------------------------------------------------------------------------------------------------------------------------------------------------------------------------------|
|                                       |          |          |          |          |          |      | dependent tryptophan adenylase; Short=TrpA; AltName: Full=Tryptophan activase; Includes: RecName: Full=ATP-dependent glycine adenylase; Short=GlyA; AltName: Full=Glycine activase; Includes: RecName: Full=Linear gramicidin-PCP reductase && PF00501:AMP-binding enzyme PF07993:Male sterility protein |
| Lachesis_group0__13_contigs__l.g6656  | 182.3389 | 64.01624 | 1.514206 | 0.008873 | 0.043652 | 1707 | - && P0CN19.1 RecName: Full=Diphthamide biosynthesis protein 1 >P0CN18.1 RecName: Full=Diphthamide biosynthesis protein 1 && PF01866:Putative diphthamide synthesis protein                                                                                                                              |
| Lachesis_group0__13_contigs__l.g9555  | 277.8795 | 97.43087 | 1.513542 | 0.006936 | 0.036474 | 456  | - && O94520.1 RecName: Full=ER membrane protein complex subunit 4 && PF06417:Protein of unknown function (DUF1077)                                                                                                                                                                                       |
| Lachesis_group0__13_contigs__l.g5783  | 581.0167 | 203.6357 | 1.512958 | 0.001689 | 0.013251 | 717  | - && P35521.1 RecName: Full=Methylosome subunit pICln; AltName: Full=Chloride channel, nucleotide sensitive 1A; AltName: Full=Chloride conductance regulatory protein ICln; Short=I(Cln) && PF03517:Regulator of volume decrease after cellular swelling                                                 |
| Lachesis_group0__13_contigs__l.g10093 | 1026.128 | 359.9569 | 1.512414 | 0.006542 | 0.034946 | 1659 | - && O94515.1 RecName: Full=T-complex protein 1 subunit zeta; Short=TCP-1-zeta; AltName: Full=CCT-zeta && PF00118:TCP-1/cpn60 chaperonin family                                                                                                                                                          |
| Lachesis_group0__13_contigs__l.g7980  | 15818.93 | 5552.427 | 1.510459 | 0.001736 | 0.013556 | 1278 | - && - && PF12937:F-box-like                                                                                                                                                                                                                                                                             |
| Lachesis_group0__13_contigs__l.g1211  | 985.5228 | 346.3226 | 1.509443 | 0.003885 | 0.024048 | 789  | - && Q8AVU2.1 RecName: Full=Ubiquitin-conjugating enzyme E2 S-B; AltName: Full=E2 ubiquitin-conjugating enzyme S-B; AltName:                                                                                                                                                                             |

|                                       |          |          |          |          |          |      |                                                                                                                                                                                                                    |
|---------------------------------------|----------|----------|----------|----------|----------|------|--------------------------------------------------------------------------------------------------------------------------------------------------------------------------------------------------------------------|
|                                       |          |          |          |          |          |      | Full=Ubiquitin carrier protein S-B; AltName: Full=Ubiquitin-protein ligase S-B && PF00179:Ubiquitin-conjugating enzyme                                                                                             |
| Lachesis_group0__13_contigs__l.g11270 | 2048.339 | 719.9356 | 1.508592 | 0.003956 | 0.024443 | 1644 | - && O74407.1 RecName: Full=Aspartate--tRNA ligase, cytoplasmic; AltName: Full=Aspartyl-tRNA synthetase; Short=AspRS && PF01336:OB-fold nucleic acid binding domain PF00152:tRNA synthetases class II (D, K and N) |
| Lachesis_group0__13_contigs__l.g11401 | 947.3125 | 333.3717 | 1.506964 | 0.003779 | 0.023563 | 876  | - && P0CS65.1 RecName: Full=mRNA 3'-end-processing protein YTH1 >P0CS64.1 RecName: Full=mRNA 3'-end-processing protein YTH1 && -                                                                                   |
| Lachesis_group0__13_contigs__l.g4220  | 3586.994 | 1263.415 | 1.505583 | 0.000352 | 0.004325 | 1239 | - && O74803.1 RecName: Full=UV excision repair protein rhp23; AltName: Full=RAD23 homolog && PF09280:XPC-binding domain PF00627:UBA/TS-N domain PF00240:Ubiquitin family                                           |
| Lachesis_group0__13_contigs__l.g2007  | 155.9403 | 54.81907 | 1.505531 | 0.004805 | 0.028136 | 1695 | - && Q7XJS0.2 RecName: Full=Histone-lysine N-methyltransferase ASHR1; AltName: Full=ASH1-related protein 1; AltName: Full=Protein SET DOMAIN GROUP 37 && PF00856:SET domain PF01753:MYND finger                    |
| Lachesis_group0__13_contigs__l.g10349 | 775.9914 | 273.3211 | 1.504912 | 0.004012 | 0.024706 | 393  | - && Q9P7L9.1 RecName: Full=Probable 54S ribosomal protein L34, mitochondrial; Short=L34mt; Flags: Precursor && PF00468:Ribosomal protein L34                                                                      |
| Lachesis_group0__13_contigs__l.g11306 | 444.7503 | 157.1076 | 1.503233 | 0.006448 | 0.034563 | 471  | - && P52434.4 RecName: Full=DNA-directed RNA polymerases I, II, and III subunit RPABC3; Short=RNA polymerases I, II, and III subunit ABC3; AltName: Full=DNA-directed RNA polymerase II                            |

|                                       |          |          |          |          |          |      |                                                                                                                                                                                                                                                                                                                                                                                                                                       |
|---------------------------------------|----------|----------|----------|----------|----------|------|---------------------------------------------------------------------------------------------------------------------------------------------------------------------------------------------------------------------------------------------------------------------------------------------------------------------------------------------------------------------------------------------------------------------------------------|
|                                       |          |          |          |          |          |      | subunit H; AltName: Full=DNA-directed RNA polymerases I, II, and III 17.1 kDa polypeptide; AltName: Full=RPB17; AltName: Full=RPB8 homolog; Short=hRPB8 >Q923G2.3 RecName: Full=DNA-directed RNA polymerases I, II, and III subunit RPABC3; Short=RNA polymerases I, II, and III subunit ABC3; AltName: Full=DNA-directed RNA polymerase II subunit H; AltName: Full=RPB17; AltName: Full=RPB8 homolog && PF03870:RNA polymerase Rpb8 |
| Lachesis_group0__13_contigs__l.g11302 | 345.9473 | 122.0702 | 1.503151 | 0.003021 | 0.020134 | 231  | - && O14036.1 RecName: Full=Small nuclear ribonucleoprotein Sm D2; Short=Sm-D2; AltName: Full=Complexed with cdc5 protein 9; AltName: Full=snRNP core protein D2 && PF01423:LSM domain                                                                                                                                                                                                                                                |
| Lachesis_group0__13_contigs__l.g5017  | 338.8097 | 119.5256 | 1.503036 | 0.001499 | 0.012223 | 1770 | - && - && PF00566:Rab-GTPase-TBC domain                                                                                                                                                                                                                                                                                                                                                                                               |
| Lachesis_group0__13_contigs__l.g10873 | 343.6053 | 121.3828 | 1.501249 | 0.003451 | 0.022173 | 1665 | - && P21269.1 RecName: Full=CCA tRNA nucleotidyltransferase, mitochondrial; AltName: Full=CCA-adding enzyme; AltName: Full=tRNA CCA-pyrophosphorylase; AltName: Full=tRNA adenylyltransferase; AltName: Full=tRNA nucleotidyltransferase; Flags: Precursor && PF01743:Poly A polymerase head domain                                                                                                                                   |
| Lachesis_group0__13_contigs__l.g8667  | 334.6427 | 118.3194 | 1.500241 | 0.001208 | 0.010488 | 1887 | - && - && PF00096:Zinc finger, C2H2 type                                                                                                                                                                                                                                                                                                                                                                                              |
| Lachesis_group0__13_contigs__l.g2253  | 1388.456 | 490.9945 | 1.499418 | 0.001331 | 0.011227 | 1779 | - && O59682.1 RecName: Full=Serine palmitoyltransferase 1; Short=SPT 1; Short=SPT1; AltName: Full=Long chain base biosynthesis                                                                                                                                                                                                                                                                                                        |

|                                      |          |          |          |          |          |      |                                                                                                                                                                                                                              |
|--------------------------------------|----------|----------|----------|----------|----------|------|------------------------------------------------------------------------------------------------------------------------------------------------------------------------------------------------------------------------------|
|                                      |          |          |          |          |          |      | protein 1 && PF00155:Aminotransferase class I and II                                                                                                                                                                         |
| Lachesis_group0__13_contigs__l.g5959 | 1575.252 | 558.2841 | 1.49693  | 0.001078 | 0.009781 | 2553 | - && Q9UTM4.1 RecName: Full=T-complex protein 1 subunit epsilon; Short=TCP-1-epsilon; AltName: Full=CCT-epsilon && PF00118:TCP-1/cpn60 chaperonin family PF00149:Calcineurin-like phosphoesterase                            |
| Lachesis_group0__13_contigs__l.g1198 | 380.2647 | 134.9224 | 1.495578 | 0.002133 | 0.015781 | 378  | - && O04438.1 RecName: Full=Signal recognition particle 9 kDa protein; Short=SRP9 && PF05486:Signal recognition particle 9 kDa protein (SRP9)                                                                                |
| Lachesis_group0__13_contigs__l.g6583 | 1046.688 | 372.3132 | 1.491653 | 0.000672 | 0.00694  | 1107 | - && P33333.1 RecName: Full=Probable 1-acyl-sn-glycerol-3-phosphate acyltransferase; Short=1-AGP acyltransferase; Short=1-AGPAT; AltName: Full=Lysophosphatidic acid acyltransferase; Short=LPAAT && PF01553:Acyltransferase |
| Lachesis_group0__13_contigs__l.g3666 | 438.814  | 156.1935 | 1.491563 | 0.00236  | 0.01699  | 1815 | - && O94336.1 RecName: Full=Uncharacterized FCP1 homology domain-containing protein C1271.03c && PF03031:NLI interacting factor-like phosphatase                                                                             |
| Lachesis_group0__13_contigs__l.g348  | 552.5878 | 196.6143 | 1.489484 | 0.009225 | 0.044634 | 1776 | - && Q9HE13.1 RecName: Full=Uncharacterized MFS-type transporter C1399.02 && PF07690:Major Facilitator Superfamily                                                                                                           |
| Lachesis_group0__13_contigs__l.g1116 | 568.4572 | 202.9623 | 1.486195 | 0.000934 | 0.008823 | 1038 | - && - && PF13383:Methyltransferase domain                                                                                                                                                                                   |
| Lachesis_group0__13_contigs__l.g4203 | 1492.938 | 534.1017 | 1.483456 | 0.001226 | 0.010623 | 1122 | - && O43036.1 RecName: Full=DNA-directed RNA polymerase I subunit rpa43; Short=RNA polymerase I subunit A43; AltName: Full=DNA-dependent RNA polymerase 19 kDa polypeptide                                                   |

|                                       |          |          |          |          |          |      |                                                                                                                                                                                                         |
|---------------------------------------|----------|----------|----------|----------|----------|------|---------------------------------------------------------------------------------------------------------------------------------------------------------------------------------------------------------|
|                                       |          |          |          |          |          |      | && PF03876:SHS2 domain found in N terminus of Rpb7p/Rpc25p/MJ0397                                                                                                                                       |
| Lachesis_group0__13_contigs__l.g2011  | 1000.888 | 358.3565 | 1.482346 | 0.001132 | 0.010067 | 2781 | - && Q10155.1 RecName: Full=Ribonuclease Z 1; Short=RNase Z 1; AltName: Full=tRNA 3 endonuclease 1; AltName: Full=tRNase Z 1 && PF12706:Beta-lactamase superfamily domain PF13691:tRNase Z endonuclease |
| Lachesis_group0__13_contigs__l.g11118 | 654.9982 | 234.6398 | 1.482226 | 0.005577 | 0.031189 | 789  | - && A1CXQ2.1 RecName: Full=37S ribosomal protein S25, mitochondrial && PF13741:Mitochondrial ribosomal protein S25                                                                                     |
| Lachesis_group0__13_contigs__l.g9837  | 170.3176 | 61.06429 | 1.481788 | 0.007566 | 0.038934 | 1227 | - && Q9P7G5.1 RecName: Full=Protein transport protein bos1 && PF12352:Snare region anchored in the vesicle membrane C-terminus                                                                          |
| Lachesis_group0__13_contigs__l.g8815  | 455.2267 | 162.8537 | 1.480869 | 0.004489 | 0.026711 | 2661 | - && Q54YS0.2 RecName: Full=DNA-binding protein DDB_G0278111 && PF04082:Fungal specific transcription factor domain PF01984:Double-stranded DNA-binding domain                                          |
| Lachesis_group0__13_contigs__l.g11398 | 2825.28  | 1012.584 | 1.480523 | 0.007353 | 0.038127 | 2682 | - && O60161.1 RecName: Full=U3 small nucleolar RNA-associated protein 4; Short=U3 snoRNA-associated protein 4; AltName: Full=U3 protein 4 required for transcription && -                               |
| Lachesis_group0__13_contigs__l.g10199 | 537.8547 | 192.8173 | 1.480158 | 0.002145 | 0.015826 | 549  | - && Q6DBY2.1 RecName: Full=N-alpha-acetyltransferase 50; AltName: Full=N-acetyltransferase NAT13; AltName: Full=NatE catalytic subunit && PF00583:Acetyltransferase (GNAT) family                      |

|                                       |          |          |          |          |          |      |                                                                                                                                                                                                                                                                                                                                                                                                             |
|---------------------------------------|----------|----------|----------|----------|----------|------|-------------------------------------------------------------------------------------------------------------------------------------------------------------------------------------------------------------------------------------------------------------------------------------------------------------------------------------------------------------------------------------------------------------|
| Lachesis_group0__13_contigs__l.g10608 | 201.6557 | 72.3931  | 1.479887 | 0.003042 | 0.020237 | 1326 | - && - && PF08265:YL1 nuclear protein C-terminal domain PF05764:YL1 nuclear protein                                                                                                                                                                                                                                                                                                                         |
| Lachesis_group0__13_contigs__l.g1008  | 1470.668 | 527.3777 | 1.479723 | 0.001558 | 0.012504 | 1380 | - && Q01852.1 RecName: Full=Mitochondrial import inner membrane translocase subunit TIM44; AltName: Full=Inner membrane import site protein 45; Short=ISP45; AltName: Full=Membrane import machinery protein MIM44; AltName: Full=Mitochondrial protein import protein 1; Flags: Precursor && PF04280:Tim44-like domain                                                                                     |
| Lachesis_group0__13_contigs__l.g6309  | 1285.703 | 461.4939 | 1.478536 | 0.000657 | 0.006808 | 1812 | - && Q6DRJ9.1 RecName: Full=Synembryn-B; AltName: Full=Protein Ric-8B; AltName: Full=Synembryn-like && PF10165:Guanine nucleotide exchange factor synembryn                                                                                                                                                                                                                                                 |
| Lachesis_group0__13_contigs__l.g2479  | 1504.115 | 539.9707 | 1.478201 | 0.001272 | 0.010914 | 1074 | - && P56329.2 RecName: Full=Probable eukaryotic translation initiation factor 2 subunit beta; Short=eIF-2-beta && PF01873:Domain found in IF2B/IF5                                                                                                                                                                                                                                                          |
| Lachesis_group0__13_contigs__l.g3902  | 1630.394 | 585.5587 | 1.477897 | 0.002535 | 0.017806 | 4077 | - && O14228.1 RecName: Full=Probable phosphoribosylformylglycinamide synthase; Short=FGAM synthase; Short=FGAMS; AltName: Full=Formylglycinamide ribonucleotide amidotransferase; Short=FGAR amidotransferase; Short=FGAR-AT; AltName: Full=Formylglycinamide ribotide amidotransferase && PF13507:CobB/CobQ-like glutamine amidotransferase domain PF02769:AIR synthase related protein, C-terminal domain |

|                                      |          |          |          |          |          |      |                                                                                                                                                                                                              |
|--------------------------------------|----------|----------|----------|----------|----------|------|--------------------------------------------------------------------------------------------------------------------------------------------------------------------------------------------------------------|
| Lachesis_group0__13_contigs__l.g4207 | 506.0264 | 181.7187 | 1.477034 | 0.001334 | 0.011237 | 798  | - && O14346.2 RecName: Full=Probable very-long-chain (3R)-3-hydroxyacyl-CoA dehydratase; AltName: Full=3-hydroxyacyl-CoA dehydratase; Short=HACD && PF04387:Protein tyrosine phosphatase-like protein, PTPLA |
| Lachesis_group0__13_contigs__l.g8420 | 2544.992 | 914.414  | 1.476738 | 0.001186 | 0.010357 | 1299 | - && B0DQB9.1 RecName: Full=Adenylosuccinate synthetase 1; Short=AMPSase 1; Short=AdSS 1; AltName: Full=IMP--aspartate ligase 1 && PF00709:Adenylosuccinate synthetase                                       |
| Lachesis_group0__13_contigs__l.g5569 | 405.4839 | 145.6286 | 1.476701 | 0.001113 | 0.010014 | 1248 | - && B8N8Q9.1 RecName: Full=NADPH dehydrogenase afvA; AltName: Full=Aflavarin synthesis protein A && PF00724:NADH:flavin oxidoreductase / NADH oxidase family                                                |
| Lachesis_group0__13_contigs__l.g6764 | 262.4217 | 94.34679 | 1.47567  | 0.002912 | 0.01963  | 1494 | - && P53960.1 RecName: Full=Putative alanyl-tRNA editing protein alaX; Short=AlaX; Short=AlaXp; Short=AlaXp-II; AltName: Full=Alanyl-tRNA deacylase alaX && PF01411:tRNA synthetases class II (A)            |
| Lachesis_group0__13_contigs__l.g9618 | 3162.247 | 1137.696 | 1.474956 | 0.000633 | 0.006596 | 1314 | - && O59948.1 RecName: Full=Eukaryotic peptide chain release factor subunit 1; Short=Eukaryotic release factor 1; Short=eRF1 && PF03463:eRF1 domain 1 PF03464:eRF1 domain 2 PF03465:eRF1 domain 3            |
| Lachesis_group0__13_contigs__l.g5845 | 2109.667 | 759.3373 | 1.474006 | 0.001952 | 0.014841 | 3162 | - && P08092.2 RecName: Full=Negative regulator of sexual conjugation and meiosis && PF00069:Protein kinase domain                                                                                            |
| Lachesis_group0__13_contigs__l.g9244 | 1347.581 | 485.2552 | 1.473387 | 0.003749 | 0.023456 | 2022 | - && Q02953.2 RecName: Full=Heat shock factor protein; Short=HSF; AltName: Full=Heat shock                                                                                                                   |



|                                      |          |          |          |          |          |      |                                                                                                                                                                                                                                         |
|--------------------------------------|----------|----------|----------|----------|----------|------|-----------------------------------------------------------------------------------------------------------------------------------------------------------------------------------------------------------------------------------------|
|                                      |          |          |          |          |          |      | transcription factor; Short=HSTF && PF00447:HSF-type DNA-binding                                                                                                                                                                        |
| Lachesis_group0__13_contigs__l.g2767 | 1827.256 | 658.1541 | 1.473265 | 0.003541 | 0.022582 | 1815 | - && Q9P7C0.1 RecName: Full=Uncharacterized WD repeat-containing protein C2E1P5.05 && -                                                                                                                                                 |
| Lachesis_group0__13_contigs__l.g6775 | 682.1389 | 246.1168 | 1.471987 | 0.00547  | 0.030845 | 606  | - && O14225.1 RecName: Full=Mitochondrial import receptor subunit tom20; AltName: Full=Mitochondrial 20 kDa outer membrane protein; AltName: Full=Translocase of outer membrane 20 kDa subunit && PF02064:MAS20 protein import receptor |
| Lachesis_group0__13_contigs__l.g5606 | 681.9103 | 245.9975 | 1.471655 | 0.002362 | 0.01699  | 375  | - && Q9VU02.1 RecName: Full=Probable small nuclear ribonucleoprotein Sm D1; Short=Sm-D1; AltName: Full=snRNP core protein D1 && PF01423:LSM domain                                                                                      |
| Lachesis_group0__13_contigs__l.g4122 | 1370.285 | 494.3632 | 1.471507 | 0.002204 | 0.016142 | 3642 | - && Q4PGM6.1 RecName: Full=Pre-mRNA-splicing factor RSE1 && PF03178:CPSF A subunit region PF10433:Mono-functional DNA-alkylating methyl methanesulfonate N-term                                                                        |
| Lachesis_group0__13_contigs__l.g82   | 9393.064 | 3389.518 | 1.470521 | 0.00062  | 0.006482 | 1479 | - && - && PF01823:MAC/Perforin domain                                                                                                                                                                                                   |
| Lachesis_group0__13_contigs__l.g1282 | 2112.563 | 762.6562 | 1.470263 | 0.0015   | 0.012223 | 4227 | - && P13433.2 RecName: Full=DNA-directed RNA polymerase, mitochondrial; Flags: Precursor && PF00940:DNA-dependent RNA polymerase PF14700:DNA-directed RNA polymerase N-terminal                                                         |
| Lachesis_group0__13_contigs__l.g1746 | 2919.946 | 1054.328 | 1.469746 | 0.000777 | 0.007679 | 1431 | - && Q09130.1 RecName: Full=Eukaryotic translation initiation factor 2 subunit gamma; Short=eIF-2-gamma && PF03144:Elongation factor Tu domain 2 PF09173:Initiation factor eIF2 gamma,                                                  |

|                                      |          |          |          |          |          |      |                                                                                                                                                                                                    |
|--------------------------------------|----------|----------|----------|----------|----------|------|----------------------------------------------------------------------------------------------------------------------------------------------------------------------------------------------------|
|                                      |          |          |          |          |          |      | C terminal PF00009:Elongation factor Tu GTP binding domain                                                                                                                                         |
| Lachesis_group0__13_contigs__l.g1503 | 3428.851 | 1238.35  | 1.469263 | 0.001507 | 0.012257 | 1323 | - && Q4PBZ9.2 RecName: Full=Non-histone chromosomal protein 6 && PF00505:HMG (high mobility group) box PF01975:Survival protein SurE                                                               |
| Lachesis_group0__13_contigs__l.g6569 | 4022.067 | 1453.547 | 1.468407 | 0.001385 | 0.011532 | 1725 | - && Q4PEZ2.1 RecName: Full=Eukaryotic translation initiation factor 3 subunit D; Short=eIF3d && PF05091:Eukaryotic translation initiation factor 3 subunit 7 (eIF-3)                              |
| Lachesis_group0__13_contigs__l.g6813 | 1759.133 | 636.4425 | 1.467217 | 0.001534 | 0.012385 | 1248 | - && P0CQ73.1 RecName: Full=ATP-dependent RNA helicase FAL1 >P0CQ72.1 RecName: Full=ATP-dependent RNA helicase FAL1 && PF00271:Helicase conserved C-terminal domain PF00270:DEAD/DEAH box helicase |
| Lachesis_group0__13_contigs__l.g2816 | 230.0809 | 83.5757  | 1.463906 | 0.007703 | 0.039531 | 1509 | - && - && PF03151:Triose-phosphate Transporter family                                                                                                                                              |
| Lachesis_group0__13_contigs__l.g2403 | 6780.885 | 2458.408 | 1.463857 | 0.002613 | 0.018153 | 2076 | - && Q5ZBH5.1 RecName: Full=DEAD-box ATP-dependent RNA helicase 25 && PF00271:Helicase conserved C-terminal domain PF00270:DEAD/DEAH box helicase                                                  |
| Lachesis_group0__13_contigs__l.g4147 | 257.2061 | 93.1696  | 1.46322  | 0.002113 | 0.015693 | 2001 | - && Q5ZLG0.1 RecName: Full=Acetoacetyl-CoA synthetase && PF00501:AMP-binding enzyme                                                                                                               |
| Lachesis_group0__13_contigs__l.g7460 | 176.0632 | 63.79076 | 1.462107 | 0.003883 | 0.024048 | 597  | - && P0CR81.1 RecName: Full=Translation machinery-associated protein 22 >P0CR80.1 RecName: Full=Translation machinery-associated protein 22 && PF01253:Translation initiation factor SUI1          |

|                                      |          |          |          |          |          |      |                                                                                                                                                                                                                                                                                                                                                                                                                            |
|--------------------------------------|----------|----------|----------|----------|----------|------|----------------------------------------------------------------------------------------------------------------------------------------------------------------------------------------------------------------------------------------------------------------------------------------------------------------------------------------------------------------------------------------------------------------------------|
| Lachesis_group0__13_contigs__l.g4806 | 808.5277 | 294.1818 | 1.459098 | 0.003264 | 0.021331 | 2127 | - && P0CL92.1 RecName: Full=Iron-sulfur clusters transporter ATM1, mitochondrial; Flags: Precursor && PF00664:ABC transporter transmembrane region PF00005:ABC transporter PF07673:Protein of unknown function (DUF1602)                                                                                                                                                                                                   |
| Lachesis_group0__13_contigs__l.g616  | 729.3939 | 265.4848 | 1.458912 | 0.00436  | 0.026191 | 864  | - && A3RCV9.1 RecName: Full=Eukaryotic translation initiation factor NCBP; AltName: Full=Novel cap-binding protein; Short=nCBP; AltName: Full=mRNA cap-binding protein && PF01652:Eukaryotic initiation factor 4E                                                                                                                                                                                                          |
| Lachesis_group0__13_contigs__l.g7393 | 1222.99  | 445.2188 | 1.458525 | 0.004377 | 0.026243 | 3720 | - && Q9P7X8.2 RecName: Full=Probable DNA-directed RNA polymerase I subunit RPA2; AltName: Full=DNA-directed RNA polymerase I polypeptide 2; Short=RNA polymerase I subunit 2 && PF06883:RNA polymerase I, Rpa2 specific domain PF04563:RNA polymerase beta subunit PF04565:RNA polymerase Rpb2, domain 3 PF00562:RNA polymerase Rpb2, domain 6 PF04561:RNA polymerase Rpb2, domain 2 PF04560:RNA polymerase Rpb2, domain 7 |
| Lachesis_group0__13_contigs__l.g6296 | 548.5413 | 199.7772 | 1.457488 | 0.005963 | 0.032745 | 2349 | - && P0CM79.1 RecName: Full=Polynucleotide 5'-hydroxyl-kinase GRC3 >P0CM78.1 RecName: Full=Polynucleotide 5'-hydroxyl-kinase GRC3 && PF16575:mRNA cleavage and polyadenylation factor CLP1 P-loop                                                                                                                                                                                                                          |
| Lachesis_group0__13_contigs__l.g815  | 1268.453 | 462.2841 | 1.4565   | 0.001516 | 0.01231  | 504  | - && Q9CWZ3.3 RecName: Full=RNA-binding protein 8A; AltName: Full=RNA-binding motif protein 8A; AltName: Full=Ribonucleoprotein                                                                                                                                                                                                                                                                                            |

|                                      |          |          |          |          |          |      |                                                                                                                                                                                                                                               |
|--------------------------------------|----------|----------|----------|----------|----------|------|-----------------------------------------------------------------------------------------------------------------------------------------------------------------------------------------------------------------------------------------------|
|                                      |          |          |          |          |          |      | RBM8A && PF00076:RNA recognition motif. (a.k.a. RRM, RBD, or RNP domain)                                                                                                                                                                      |
| Lachesis_group0__13_contigs__l.g7157 | 2438.335 | 888.6737 | 1.456068 | 0.003419 | 0.022031 | 1887 | - && Q54BM8.1 RecName: Full=UPF0652 protein && PF09418:Protein of unknown function (DUF2009)                                                                                                                                                  |
| Lachesis_group0__13_contigs__l.g1351 | 1476.889 | 538.5739 | 1.455772 | 0.000541 | 0.005917 | 2631 | - && Q5AP95.1 RecName: Full=Suppressor of ferric uptake 1 && PF08550:Fungal protein of unknown function (DUF1752) PF00320:GATA zinc finger                                                                                                    |
| Lachesis_group0__13_contigs__l.g8559 | 1754.102 | 639.6204 | 1.455656 | 0.002314 | 0.016722 | 756  | - && Q9UUA4.1 RecName: Full=Translocation protein sec66 && PF09802:Preprotein translocase subunit Sec66                                                                                                                                       |
| Lachesis_group0__13_contigs__l.g7059 | 741.8494 | 271.0971 | 1.452257 | 0.004153 | 0.025317 | 1581 | - && O42997.1 RecName: Full=Uncharacterized protein C27B12.07 && PF07798:Protein of unknown function (DUF1640)                                                                                                                                |
| Lachesis_group0__13_contigs__l.g6964 | 546.4527 | 199.9445 | 1.451808 | 0.00668  | 0.035476 | 2184 | - && Q9P7H1.1 RecName: Full=Tyrosine-protein phosphatase CDC14 homolog; AltName: Full=CDC fourteen-like phosphatase 1 && PF00782:Dual specificity phosphatase, catalytic domain PF14671:Dual specificity protein phosphatase, N-terminal half |
| Lachesis_group0__13_contigs__l.g6505 | 245.4308 | 89.8684  | 1.450482 | 0.005786 | 0.03202  | 1197 | - && Q10659.1 RecName: Full=Membrane glycoprotein spo14; AltName: Full=SEC12-like protein; AltName: Full=Sporulation-specific protein 14 && -                                                                                                 |
| Lachesis_group0__13_contigs__l.g7406 | 471.4309 | 173.1382 | 1.445382 | 0.00243  | 0.017323 | 510  | - && P59998.3 RecName: Full=Actin-related protein 2/3 complex subunit 4; AltName: Full=Arp2/3 complex 20 kDa subunit; Short=p20-ARC >P59999.3 RecName: Full=Actin-related protein 2/3 complex                                                 |

|                                      |          |          |          |          |          |      |                                                                                                                                                                                                                                                                                                                         |
|--------------------------------------|----------|----------|----------|----------|----------|------|-------------------------------------------------------------------------------------------------------------------------------------------------------------------------------------------------------------------------------------------------------------------------------------------------------------------------|
|                                      |          |          |          |          |          |      | subunit 4; AltName: Full=Arp2/3 complex 20 kDa subunit; Short=p20-ARC >Q148J6.3 RecName: Full=Actin-related protein 2/3 complex subunit 4; AltName: Full=Arp2/3 complex 20 kDa subunit; Short=p20-ARC && PF05856:ARP2/3 complex 20 kDa subunit (ARPC4)                                                                  |
| Lachesis_group0__13_contigs__l.g9005 | 1403.215 | 515.5304 | 1.445095 | 0.003232 | 0.021154 | 2283 | - && O13775.1 RecName: Full=Probable glutamate-tRNA ligase, cytoplasmic; AltName: Full=Glutamyl-tRNA synthetase; Short=GluRS && PF14497:Glutathione S-transferase, C-terminal domain PF00749:tRNA synthetases class I (E and Q), catalytic domain PF03950:tRNA synthetases class I (E and Q), anti-codon binding domain |
| Lachesis_group0__13_contigs__l.g4703 | 1599.614 | 587.746  | 1.444459 | 0.001646 | 0.013017 | 1890 | - && - && PF16561:Glycogen recognition site of AMP-activated protein kinase PF04739:5'-AMP-activated protein kinase beta subunit, interaction domain                                                                                                                                                                    |
| Lachesis_group0__13_contigs__l.g1001 | 485.8348 | 178.5527 | 1.444086 | 0.009504 | 0.045548 | 450  | - && Q2K2Y1.1 RecName: Full=50S ribosomal protein L21 && PF00829:Ribosomal prokaryotic L21 protein                                                                                                                                                                                                                      |
| Lachesis_group0__13_contigs__l.g4622 | 1818.285 | 670.4227 | 1.439758 | 0.000945 | 0.008901 | 2739 | - && P56286.1 RecName: Full=Eukaryotic translation initiation factor 2 subunit alpha; Short=eIF-2-alpha && PF00575:S1 RNA binding domain PF07541:Eukaryotic translation initiation factor 2 alpha subunit                                                                                                               |
| Lachesis_group0__13_contigs__l.g2481 | 909.4155 | 335.8319 | 1.437962 | 0.007103 | 0.037236 | 1515 | - && Q5XJY5.2 RecName: Full=Coatomer subunit delta; AltName: Full=Archain; AltName: Full=Delta-coat protein; Short=Delta-COP &&                                                                                                                                                                                         |

|                                      |          |          |          |          |          |      |                                                                                                                                                                                                                                                    |
|--------------------------------------|----------|----------|----------|----------|----------|------|----------------------------------------------------------------------------------------------------------------------------------------------------------------------------------------------------------------------------------------------------|
|                                      |          |          |          |          |          |      | PF00928:Adaptor complexes medium subunit family PF01217:Clathrin adaptor complex small chain                                                                                                                                                       |
| Lachesis_group0__13_contigs__l.g8374 | 313.9949 | 116.2107 | 1.436696 | 0.010437 | 0.04864  | 3924 | - && P36619.2 RecName: Full=Leptomycin B resistance protein pmd1 && PF00664:ABC transporter transmembrane region PF00005:ABC transporter PF07673:Protein of unknown function (DUF1602)                                                             |
| Lachesis_group0__13_contigs__l.g5552 | 5358.569 | 1980.25  | 1.436355 | 0.002913 | 0.01963  | 1521 | - && O94260.1 RecName: Full=Putative G3BP-like protein && PF02136:Nuclear transport factor 2 (NTF2) domain PF00076:RNA recognition motif. (a.k.a. RRM, RBD, or RNP domain)                                                                         |
| Lachesis_group0__13_contigs__l.g6054 | 490.0532 | 180.9692 | 1.436274 | 0.006795 | 0.03593  | 1248 | - && O74480.1 RecName: Full=Uncharacterized protein C1840.07c; Flags: Precursor && PF00149:Calcineurin-like phosphoesterase                                                                                                                        |
| Lachesis_group0__13_contigs__l.g3735 | 594.8803 | 219.8842 | 1.436124 | 0.001322 | 0.011204 | 1905 | - && Q9UNZ2.2 RecName: Full=NSFL1 cofactor p47; AltName: Full=UBX domain-containing protein 2C; AltName: Full=p97 cofactor p47 >Q5RBG3.1 RecName: Full=NSFL1 cofactor p47; AltName: Full=p97 cofactor p47 && PF00789:UBX domain PF08059:SEP domain |
| Lachesis_group0__13_contigs__l.g4462 | 178.3419 | 65.75095 | 1.436006 | 0.005673 | 0.031596 | 5823 | - && Q3UMC0.2 RecName: Full=Spermatogenesis-associated protein 5; AltName: Full=Spermatogenesis-associated factor protein && PF00004:ATPase family associated with various cellular activities (AAA)                                               |
| Lachesis_group0__13_contigs__l.g6629 | 990.7869 | 366.4815 | 1.435266 | 0.001973 | 0.01495  | 483  | - && O74866.1 RecName: Full=Riboflavin kinase; AltName: Full=ATP:riboflavin 5'-                                                                                                                                                                    |

|                                       |          |          |          |          |          |      |                                                                                                                                                                                                                                                                                              |
|---------------------------------------|----------|----------|----------|----------|----------|------|----------------------------------------------------------------------------------------------------------------------------------------------------------------------------------------------------------------------------------------------------------------------------------------------|
|                                       |          |          |          |          |          |      | phosphotransferase; AltName: Full=Flavin mononucleotide kinase 1; AltName: Full=Flavokinase && PF01687:Riboflavin kinase                                                                                                                                                                     |
| Lachesis_group0__13_contigs__l.g5626  | 1825.809 | 676.1563 | 1.4331   | 0.008218 | 0.041303 | 2238 | - && Q02799.1 RecName: Full=Zinc finger protein LEE1 && -                                                                                                                                                                                                                                    |
| Lachesis_group0__13_contigs__l.g9537  | 563.6266 | 209.0341 | 1.431432 | 0.002379 | 0.017083 | 1092 | - && O94505.1 RecName: Full=3'(2'),5'-bisphosphate nucleotidase; AltName: Full=3'(2'),5'-bisphosphonucleoside 3'(2')-phosphohydrolase; AltName: Full=DPNPase; AltName: Full=Halotolerance protein tol1; AltName: Full=Target of lithium protein 1 && PF00459:Inositol monophosphatase family |
| Lachesis_group0__13_contigs__l.g8182  | 1174.739 | 435.5054 | 1.431377 | 0.00075  | 0.007473 | 2562 | - && - && PF04082:Fungal specific transcription factor domain                                                                                                                                                                                                                                |
| Lachesis_group0__13_contigs__l.g11714 | 351.8659 | 130.6195 | 1.429952 | 0.008968 | 0.043868 | 567  | - && - && PF09812:Mitochondrial ribosomal protein L28                                                                                                                                                                                                                                        |
| Lachesis_group0__13_contigs__l.g5573  | 222.7955 | 82.83592 | 1.429228 | 0.005633 | 0.031467 | 1773 | - && Q6BLF4.2 RecName: Full=Flap endonuclease 1; Short=FEN-1; AltName: Full=Flap structure-specific endonuclease 1 && PF00867:XPG I-region                                                                                                                                                   |
| Lachesis_group0__13_contigs__l.g2177  | 1890.993 | 703.2076 | 1.427243 | 0.000614 | 0.006441 | 3603 | - && Q8RWR2.2 RecName: Full=La-related protein 1B; Short=AtLARP1b && PF05383:La domain                                                                                                                                                                                                       |
| Lachesis_group0__13_contigs__l.g3921  | 390.4868 | 145.4134 | 1.427143 | 0.008122 | 0.041009 | 696  | - && Q5M9I6.2 RecName: Full=Multiple myeloma tumor-associated protein 2 homolog && PF10159:Kinase phosphorylation protein                                                                                                                                                                    |
| Lachesis_group0__13_contigs__l.g6946  | 267.8245 | 99.88813 | 1.424522 | 0.009894 | 0.046904 | 1797 | - && - && PF09734:RNA polymerase III transcription factor (TF)IIIC subunit                                                                                                                                                                                                                   |
| Lachesis_group0__13_contigs__l.g3532  | 263.08   | 97.94775 | 1.424514 | 0.004399 | 0.026321 | 855  | - && Q9US54.1 RecName: Full=Transcription initiation factor TFIID subunit 11; AltName:                                                                                                                                                                                                       |

|                                      |          |          |          |          |          |      |                                                                                                                                                                                                                                                                                                                                                                                                                                                                                                      |
|--------------------------------------|----------|----------|----------|----------|----------|------|------------------------------------------------------------------------------------------------------------------------------------------------------------------------------------------------------------------------------------------------------------------------------------------------------------------------------------------------------------------------------------------------------------------------------------------------------------------------------------------------------|
|                                      |          |          |          |          |          |      | Full=TBP-associated factor 11 && PF04719:hTAFII28-like protein conserved region                                                                                                                                                                                                                                                                                                                                                                                                                      |
| Lachesis_group0__13_contigs__l.g6950 | 701.8531 | 262.0621 | 1.421486 | 0.002577 | 0.017985 | 1848 | - && O94547.1 RecName: Full=Serine/threonine-protein kinase srk1; AltName: Full=Sty1-regulated kinase 1 && PF00069:Protein kinase domain                                                                                                                                                                                                                                                                                                                                                             |
| Lachesis_group0__13_contigs__l.g1374 | 10784.09 | 4029.091 | 1.420429 | 0.001496 | 0.012219 | 2376 | - && P29547.2 RecName: Full=Elongation factor 1-gamma 1; Short=EF-1-gamma 1; AltName: Full=Calcium and membrane-binding protein 1; AltName: Full=Calcium phospholipid-binding protein; Short=CPBP; AltName: Full=Eukaryotic elongation factor 1Bgamma 1; Short=eEF1Bgamma 1; AltName: Full=Translation elongation factor 1B gamma 1 && PF02798:Glutathione S-transferase, N-terminal domain PF00043:Glutathione S-transferase, C-terminal domain PF00647:Elongation factor 1 gamma, conserved domain |
| Lachesis_group0__13_contigs__l.g1703 | 503.912  | 188.4505 | 1.420029 | 0.003634 | 0.02305  | 1122 | - && Q01080.2 RecName: Full=DNA-directed RNA polymerase I subunit RPA49; Short=A49; AltName: Full=DNA-directed RNA polymerase I 49 kDa polypeptide && PF06870:A49-like RNA polymerase I associated factor                                                                                                                                                                                                                                                                                            |
| Lachesis_group0__13_contigs__l.g6693 | 643.0513 | 240.57   | 1.419637 | 0.00495  | 0.028708 | 3240 | - && O74429.1 RecName: Full=Inositol hexakisphosphate and diphosphoinositol-pentakisphosphate kinase; AltName: Full=Cortical actin cytoskeleton protein asp1; AltName: Full=InsP6 and PP-IP5 kinase &&                                                                                                                                                                                                                                                                                               |



|                                      |          |          |          |          |          |      |                                                                                                                                                                                                                                                                                                                                  |
|--------------------------------------|----------|----------|----------|----------|----------|------|----------------------------------------------------------------------------------------------------------------------------------------------------------------------------------------------------------------------------------------------------------------------------------------------------------------------------------|
|                                      |          |          |          |          |          |      | PF00328:Histidine phosphatase superfamily (branch 2)                                                                                                                                                                                                                                                                             |
| Lachesis_group0__13_contigs__l.g2358 | 413.9114 | 154.5618 | 1.419499 | 0.005311 | 0.03018  | 2211 | - && - && PF11696:Protein of unknown function (DUF3292)                                                                                                                                                                                                                                                                          |
| Lachesis_group0__13_contigs__l.g7968 | 199.2697 | 74.57516 | 1.418954 | 0.00579  | 0.03202  | 1731 | - && Q96MW5.2 RecName: Full=Conserved oligomeric Golgi complex subunit 8; Short=COG complex subunit 8; AltName: Full=Component of oligomeric Golgi complex 8 && PF04124:Dor1-like family                                                                                                                                         |
| Lachesis_group0__13_contigs__l.g8796 | 7142.658 | 2672.372 | 1.418338 | 0.001773 | 0.013777 | 3939 | - && Q7PPA5.5 RecName: Full=Calcium-transporting ATPase sarcoplasmic/endoplasmic reticulum type; AltName: Full=Calcium pump && PF00122:E1-E2 ATPase PF00690:Cation transporter/ATPase, N-terminus PF00689:Cation transporting ATPase, C-terminus PF00702:haloacid dehalogenase-like hydrolase PF00248:Aldo/keto reductase family |
| Lachesis_group0__13_contigs__l.g5974 | 822.047  | 308.3207 | 1.415338 | 0.001726 | 0.013497 | 3204 | - && B0DAD3.1 RecName: Full=Exportin-T; AltName: Full=Exportin(tRNA); AltName: Full=Karyopherin-beta; AltName: Full=tRNA exportin && PF08389:Exportin 1-like protein                                                                                                                                                             |
| Lachesis_group0__13_contigs__l.g7941 | 1708.912 | 640.9697 | 1.414847 | 0.001902 | 0.014595 | 2829 | - && P23955.2 RecName: Full=Mitochondrial-processing peptidase subunit alpha; AltName: Full=Alpha-MPP; Flags: Precursor && PF00675:Insulinase (Peptidase family M16) PF05193:Peptidase M16 inactive domain                                                                                                                       |
| Lachesis_group0__13_contigs__l.g8480 | 1420.355 | 533.85   | 1.41203  | 0.003702 | 0.023299 | 3213 | - && A8NEP3.2 RecName: Full=Tryptophan synthase && PF01008:Initiation factor 2 subunit                                                                                                                                                                                                                                           |

|                                       |          |          |          |          |          |      |                                                                                                                                                                                                                   |
|---------------------------------------|----------|----------|----------|----------|----------|------|-------------------------------------------------------------------------------------------------------------------------------------------------------------------------------------------------------------------|
|                                       |          |          |          |          |          |      | family PF00291:Pyridoxal-phosphate dependent enzyme PF00290:Tryptophan synthase alpha chain                                                                                                                       |
| Lachesis_group0__13_contigs__l.g2330  | 859.5443 | 323.127  | 1.411731 | 0.004116 | 0.025204 | 1503 | - && Q874L4.1 RecName: Full=Vitamin B6 transporter TPN1; AltName: Full=Transport of pyridoxine protein 1 && PF02133:Permease for cytosine/purines, uracil, thiamine, allantoin                                    |
| Lachesis_group0__13_contigs__l.g9391  | 224.9884 | 84.65303 | 1.411413 | 0.007793 | 0.039821 | 1275 | - && P0CO07.1 RecName: Full=Histone acetyltransferase type B catalytic subunit >P0CO06.1 RecName: Full=Histone acetyltransferase type B catalytic subunit && PF10394:Histone acetyl transferase HAT1 N-terminus   |
| Lachesis_group0__13_contigs__l.g6435  | 1040.731 | 391.3687 | 1.411332 | 0.004134 | 0.025271 | 2898 | - && P87177.1 RecName: Full=Uncharacterized WD repeat-containing protein C3D6.12 && PF00400:WD domain, G-beta repeat PF04003:Dip2/Utp12 Family                                                                    |
| Lachesis_group0__13_contigs__l.g5703  | 152.3942 | 57.57091 | 1.40802  | 0.008725 | 0.043156 | 1719 | - && Q5F1R6.2 RecName: Full=DnaJ homolog subfamily C member 21; AltName: Full=DnaJ homolog subfamily A member 5; AltName: Full=Protein GS3 && PF00226:DnaJ domain PF12171:Zinc-finger double-stranded RNA-binding |
| Lachesis_group0__13_contigs__l.g10437 | 374.4256 | 141.3179 | 1.407099 | 0.003227 | 0.021145 | 1173 | - && - && PF00398:Ribosomal RNA adenine dimethylase                                                                                                                                                               |
| Lachesis_group0__13_contigs__l.g8053  | 530.4256 | 199.9908 | 1.407095 | 0.001597 | 0.012737 | 1485 | - && A9IMS2.1 RecName: Full=30S ribosomal protein S15 && PF00312:Ribosomal protein S15                                                                                                                            |
| Lachesis_group0__13_contigs__l.g8795  | 3218.287 | 1213.849 | 1.406573 | 0.00098  | 0.009126 | 2028 | - && Q2TZ06.1 RecName: Full=Protein sip5 && -                                                                                                                                                                     |
| Lachesis_group0__13_contigs__l.g4275  | 360.164  | 135.7463 | 1.405733 | 0.006347 | 0.034271 | 492  | - && - && PF09451:Autophagy-related protein 27                                                                                                                                                                    |

|                                      |          |          |          |          |          |      |                                                                                                                                                                                                                                                                               |
|--------------------------------------|----------|----------|----------|----------|----------|------|-------------------------------------------------------------------------------------------------------------------------------------------------------------------------------------------------------------------------------------------------------------------------------|
| Lachesis_group0__13_contigs__l.g9033 | 175.5333 | 66.4116  | 1.404317 | 0.006395 | 0.03443  | 1290 | - && O82244.1 RecName: Full=Dol-P-Man:Man(5)GlcNAc(2)-PP-Dol alpha-1,3-mannosyltransferase; AltName: Full=Alpha-1,3-mannosyltransferase ALG3; AltName: Full=Asparagine-linked glycosylation protein 3; Short=AtALG3; AltName: Full=Not56-like protein && PF05208:ALG3 protein |
| Lachesis_group0__13_contigs__l.g3649 | 486.9022 | 183.966  | 1.404217 | 0.00217  | 0.015959 | 1656 | - && B2AFW1.1 RecName: Full=Probable Xaa-Pro aminopeptidase PEPP; AltName: Full=Aminoacylproline aminopeptidase; AltName: Full=Prolidase && PF00557:Metallopeptidase family M24 PF05195:Aminopeptidase P, N-terminal domain                                                   |
| Lachesis_group0__13_contigs__l.g8894 | 917.4035 | 346.7812 | 1.404161 | 0.007621 | 0.039165 | 2220 | - && P17423.4 RecName: Full=Homoserine kinase; Short=HK; Short=HSK && PF04670:Gtr1/RagA G protein conserved region PF00288:GHMP kinases N terminal domain                                                                                                                     |
| Lachesis_group0__13_contigs__l.g4870 | 382.3122 | 144.741  | 1.401927 | 0.002022 | 0.015225 | 2730 | - && P78810.2 RecName: Full=Vacuolar transporter chaperone 4 && PF02656:Domain of unknown function (DUF202) PF09359:VTC domain PF03105:SPX domain                                                                                                                             |
| Lachesis_group0__13_contigs__l.g5369 | 1009.263 | 382.7828 | 1.399571 | 0.010363 | 0.048436 | 1095 | - && O94671.1 RecName: Full=Probable homoserine dehydrogenase; Short=HDH && PF03447:Homoserine dehydrogenase, NAD binding domain PF00742:Homoserine dehydrogenase                                                                                                             |

|                                       |          |          |          |          |          |      |                                                                                                                                                                                        |
|---------------------------------------|----------|----------|----------|----------|----------|------|----------------------------------------------------------------------------------------------------------------------------------------------------------------------------------------|
| Lachesis_group0__13_contigs__l.g8083  | 954.4625 | 361.8891 | 1.398945 | 0.007472 | 0.038558 | 978  | - && Q9UU99.1 RecName: Full=CRAL-TRIO domain-containing protein C23B6.04c && PF00650:CRAL/TRIO domain                                                                                  |
| Lachesis_group0__13_contigs__l.g6492  | 544.5803 | 206.5221 | 1.398427 | 0.006009 | 0.032965 | 1443 | - && O94673.2 RecName: Full=Uncharacterized membrane protein C776.05 && PF10998:Protein of unknown function (DUF2838)                                                                  |
| Lachesis_group0__13_contigs__l.g6314  | 10306.79 | 3915.128 | 1.396506 | 0.005    | 0.028905 | 1725 | - && P27476.1 RecName: Full=Nuclear localization sequence-binding protein; AltName: Full=p67 && PF00076:RNA recognition motif. (a.k.a. RRM, RBD, or RNP domain)                        |
| Lachesis_group0__13_contigs__l.g4405  | 540.052  | 205.5696 | 1.394474 | 0.005706 | 0.03172  | 1095 | - && O60122.1 RecName: Full=Anthranilate phosphoribosyltransferase && PF02885:Glycosyl transferase family, helical bundle domain PF00591:Glycosyl transferase family, a/b domain       |
| Lachesis_group0__13_contigs__l.g6002  | 951.4706 | 362.074  | 1.394396 | 0.001184 | 0.010357 | 2526 | - && P87122.1 RecName: Full=Putative cation exchanger C3A12.06c && PF01699:Sodium/calcium exchanger protein                                                                            |
| Lachesis_group0__13_contigs__l.g10688 | 1178.107 | 448.7507 | 1.392434 | 0.008965 | 0.043868 | 690  | - && Q9C8J2.1 RecName: Full=NifU-like protein 5, mitochondrial; Short=AtNfu-I; Short=AtNfu5; Flags: Precursor && PF08712:Scaffold protein Nfu/NifU N terminal PF01106:NifU-like domain |
| Lachesis_group0__13_contigs__l.g5681  | 989.5185 | 377.2632 | 1.391027 | 0.005575 | 0.031189 | 897  | - && O14241.1 RecName: Full=Actin-related protein 2/3 complex subunit 2; AltName: Full=Arp2/3 complex 34 kDa subunit; Short=p34-ARC && PF04045:Arp2/3 complex, 34 kD subunit p34-Arc   |

|                                       |          |          |          |          |          |      |                                                                                                                                                                                                                                                   |
|---------------------------------------|----------|----------|----------|----------|----------|------|---------------------------------------------------------------------------------------------------------------------------------------------------------------------------------------------------------------------------------------------------|
| Lachesis_group0__13_contigs__l.g5726  | 557.2454 | 212.7263 | 1.390232 | 0.002042 | 0.015335 | 3099 | - && - && PF01494:FAD binding domain PF04424:Protein of unknown function (DUF544)                                                                                                                                                                 |
| Lachesis_group0__13_contigs__l.g10319 | 1332.126 | 509.7316 | 1.386114 | 0.000608 | 0.00639  | 684  | - && Q09176.2 RecName: Full=Splicing factor U2AF 23 kDa subunit; AltName: Full=U2 auxiliary factor 23 kDa subunit; Short=U2AF23; AltName: Full=U2 snRNP auxiliary factor small subunit && PF00642:Zinc finger C-x8-C-x5-C-x3-H type (and similar) |
| Lachesis_group0__13_contigs__l.g11390 | 3831.644 | 1467.593 | 1.384566 | 0.002924 | 0.019647 | 2985 | - && O74359.1 RecName: Full=Meiotically up-regulated gene 60 protein && PF00013:KH domain                                                                                                                                                         |
| Lachesis_group0__13_contigs__l.g6956  | 853.6714 | 327.2603 | 1.384136 | 0.007909 | 0.04021  | 1941 | - && P40996.1 RecName: Full=Protein scd2/ral3 && PF00018:SH3 domain PF00787:PX domain                                                                                                                                                             |
| Lachesis_group0__13_contigs__l.g7552  | 381.9483 | 146.5813 | 1.383526 | 0.005244 | 0.029891 | 1671 | - && P32561.1 RecName: Full=Histone deacetylase RPD3; AltName: Full=Transcriptional regulatory protein RPD3 && PF00850:Histone deacetylase domain                                                                                                 |
| Lachesis_group0__13_contigs__l.g11560 | 1192.248 | 457.9105 | 1.380583 | 0.001233 | 0.010666 | 2190 | - && O74828.1 RecName: Full=Pre-rRNA-processing protein esf1 && PF08159:NUC153 domain                                                                                                                                                             |
| Lachesis_group0__13_contigs__l.g381   | 284.3605 | 109.3301 | 1.379488 | 0.002683 | 0.018535 | 936  | - && Q96VP6.1 RecName: Full=Phosphoribosylaminoimidazole-succinocarboxamide synthase; AltName: Full=SAICAR synthetase && PF01259:SAICAR synthetase                                                                                                |
| Lachesis_group0__13_contigs__l.g3423  | 1631.756 | 627.6895 | 1.378638 | 0.004356 | 0.026179 | 1800 | - && - && PF11735:Cryptococcal mannosyltransferase 1                                                                                                                                                                                              |

|                                       |          |          |          |          |          |      |                                                                                                                                                                                                                  |
|---------------------------------------|----------|----------|----------|----------|----------|------|------------------------------------------------------------------------------------------------------------------------------------------------------------------------------------------------------------------|
| Lachesis_group0__13_contigs__l.g4537  | 1002.351 | 385.7281 | 1.378105 | 0.002502 | 0.017661 | 3513 | - && - && PF14523:Syntaxin-like protein PF05739:SNARE domain                                                                                                                                                     |
| Lachesis_group0__13_contigs__l.g283   | 436.0728 | 168.0918 | 1.376899 | 0.004535 | 0.026902 | 954  | - && Q5RFR8.1 RecName: Full=Coatomer subunit epsilon; AltName: Full=Epsilon-coat protein; Short=Epsilon-COP && PF04733:Coatomer epsilon subunit                                                                  |
| Lachesis_group0__13_contigs__l.g11442 | 849.1652 | 327.2452 | 1.375734 | 0.00163  | 0.012911 | 1032 | - && Q8TG13.1 RecName: Full=Casein kinase II subunit alpha; Short=CK II subunit alpha && PF00069:Protein kinase domain                                                                                           |
| Lachesis_group0__13_contigs__l.g7102  | 336.0858 | 129.9644 | 1.371609 | 0.001802 | 0.013975 | 471  | - && P40046.3 RecName: Full=Vacuolar transporter chaperone 1; AltName: Full=Negative regulator of CDC42 protein 1; AltName: Full=Phosphate metabolism protein 4 && PF02656:Domain of unknown function (DUF202)   |
| Lachesis_group0__13_contigs__l.g341   | 360.1876 | 139.5478 | 1.369445 | 0.005457 | 0.030786 | 1212 | - && Q08641.3 RecName: Full=tRNA(Thr) (cytosine(32)-N(3))-methyltransferase; AltName: Full=Actin-binding protein of 140 kDa; AltName: Full=tRNA methyltransferase of 140 kDa && PF13489:Methyltransferase domain |
| Lachesis_group0__13_contigs__l.g456   | 2428.581 | 940.552  | 1.368791 | 0.002097 | 0.015603 | 1110 | - && O59785.1 RecName: Full=Uncharacterized solute carrier family 35 member C320.08 && PF06027:Solute carrier family 35                                                                                          |
| Lachesis_group0__13_contigs__l.g2946  | 2895.796 | 1123.812 | 1.365809 | 0.005003 | 0.028907 | 4347 | - && Q4P2B6.1 RecName: Full=Protein transport protein SEC31 && PF07304:Steroid receptor RNA activator (SRA1)                                                                                                     |
| Lachesis_group0__13_contigs__l.g6447  | 760.3479 | 295.4538 | 1.36465  | 0.002501 | 0.017661 | 2241 | - && Q9P787.1 RecName: Full=ER membrane protein complex subunit 3 && PF01956:Integral membrane protein DUF106                                                                                                    |

|                                       |          |          |          |          |          |      |                                                                                                                                                                                                                                                                                                                                                             |
|---------------------------------------|----------|----------|----------|----------|----------|------|-------------------------------------------------------------------------------------------------------------------------------------------------------------------------------------------------------------------------------------------------------------------------------------------------------------------------------------------------------------|
| Lachesis_group0__13_contigs__l.g11156 | 2331.134 | 905.8833 | 1.363914 | 0.001625 | 0.012884 | 2838 | - && Q6DFC6.1 RecName: Full=WD repeat-containing protein 75 && -                                                                                                                                                                                                                                                                                            |
| Lachesis_group0__13_contigs__l.g2879  | 2124.945 | 827.5176 | 1.360692 | 0.006554 | 0.034956 | 1704 | - && O94512.1 RecName: Full=Oxysterol-binding protein-like protein 1 && PF01237:Oxysterol-binding protein                                                                                                                                                                                                                                                   |
| Lachesis_group0__13_contigs__l.g5614  | 809.8643 | 315.5126 | 1.360376 | 0.001574 | 0.012618 | 3336 | - && - && PF00651:BTB/POZ domain                                                                                                                                                                                                                                                                                                                            |
| Lachesis_group0__13_contigs__l.g11379 | 1507.031 | 587.7316 | 1.358478 | 0.004102 | 0.025135 | 4032 | - && Q6NZN0.2 RecName: Full=RNA-binding protein 26; AltName: Full=Protein expressed in male leptotene and zygotene spermatocytes 393; Short=MLZ-393; AltName: Full=RNA-binding motif protein 26 && PF01480:PWI domain PF12171:Zinc-finger double-stranded RNA-binding PF01585:G-patch domain PF14259:RNA recognition motif (a.k.a. RRM, RBD, or RNP domain) |
| Lachesis_group0__13_contigs__l.g5866  | 187.9194 | 73.3099  | 1.357536 | 0.008886 | 0.043675 | 1068 | - && - && PF07961:MBA1-like protein                                                                                                                                                                                                                                                                                                                         |
| Lachesis_group0__13_contigs__l.g9366  | 783.0663 | 305.8543 | 1.35716  | 0.004622 | 0.027331 | 879  | - && - && PF11788:39S mitochondrial ribosomal protein L46                                                                                                                                                                                                                                                                                                   |
| Lachesis_group0__13_contigs__l.g10822 | 11551.27 | 4518.132 | 1.3543   | 0.001478 | 0.012096 | 1983 | - && P35190.1 RecName: Full=PHO85 cyclin CLG1; AltName: Full=Cyclin-like G1 protein 1 && PF08613:Cyclin                                                                                                                                                                                                                                                     |
| Lachesis_group0__13_contigs__l.g1546  | 731.7096 | 286.4812 | 1.353688 | 0.007547 | 0.038889 | 1779 | - && Q55EC7.1 RecName: Full=RasGEF domain-containing serine/threonine-protein kinase X; AltName: Full=Ras guanine nucleotide exchange factor X; AltName: Full=RasGEF domain-containing protein X && PF00130:Phorbol esters/diacylglycerol binding domain (C1 domain) PF07714:Protein tyrosine kinase                                                        |

|                                       |          |          |          |          |          |      |                                                                                                                                                                                                                                                                               |
|---------------------------------------|----------|----------|----------|----------|----------|------|-------------------------------------------------------------------------------------------------------------------------------------------------------------------------------------------------------------------------------------------------------------------------------|
| Lachesis_group0__13_contigs__l.g3643  | 817.4222 | 319.7963 | 1.353613 | 0.005225 | 0.029829 | 1389 | - && P47154.1 RecName: Full=CAAX prenyl protease 1; AltName: Full=A-factor-converting enzyme; AltName: Full=Prenyl protein-specific endoprotease 1; Short=PPSEP 1 && PF16491:CAAX prenyl protease N-terminal, five membrane helices PF01435:Peptidase family M48              |
| Lachesis_group0__13_contigs__l.g3675  | 5197.201 | 2034.516 | 1.353197 | 0.003083 | 0.020446 | 3057 | - && Q4P358.2 RecName: Full=Eukaryotic translation initiation factor 3 subunit A; Short=eIF3a; AltName: Full=Eukaryotic translation initiation factor 3 110 kDa subunit homolog; Short=eIF3 p110; AltName: Full=Translation initiation factor eIF3, p110 subunit homolog && - |
| Lachesis_group0__13_contigs__l.g6074  | 1592.541 | 624.0891 | 1.35181  | 0.009295 | 0.044899 | 2304 | - && Q4PE39.1 RecName: Full=Protein transport protein SEC23 && PF04810:Sec23/Sec24 zinc finger PF08033:Sec23/Sec24 beta-sandwich domain PF00626:Gelsolin repeat PF04811:Sec23/Sec24 trunk domain PF04815:Sec23/Sec24 helical domain                                           |
| Lachesis_group0__13_contigs__l.g11420 | 753.5268 | 295.6057 | 1.350303 | 0.004931 | 0.028645 | 681  | - && Q5RKQ0.1 RecName: Full=Pre-mRNA-splicing factor SPF27; AltName: Full=Protein BCAS2 homolog && PF05700:Breast carcinoma amplified sequence 2 (BCAS2)                                                                                                                      |
| Lachesis_group0__13_contigs__l.g11643 | 394.0388 | 154.7557 | 1.348867 | 0.008622 | 0.042781 | 2010 | - && Q8CI33.2 RecName: Full=CWF19-like protein 1 && PF13696:Zinc knuckle PF04677:Protein similar to Cwfj C-terminus 1 PF04676:Protein similar to Cwfj C-terminus 2                                                                                                            |
| Lachesis_group0__13_contigs__l.g5229  | 414.5989 | 163.2039 | 1.345097 | 0.007737 | 0.039667 | 975  | - && Q9P7Z3.1 RecName: Full=Protein-lysine N-methyltransferase efm4; AltName: Full=Elongation                                                                                                                                                                                 |



|                                       |          |          |          |          |          |      |                                                                                                                                                       |
|---------------------------------------|----------|----------|----------|----------|----------|------|-------------------------------------------------------------------------------------------------------------------------------------------------------|
|                                       |          |          |          |          |          |      | factor methyltransferase 4; AltName: Full=Secretion and early endocytosis protein 1 homolog && PF12847:Methyltransferase domain                       |
| Lachesis_group0__13_contigs__l.g9201  | 231.2931 | 91.29068 | 1.343429 | 0.008955 | 0.043868 | 1194 | - && - && PF02213:GYF domain                                                                                                                          |
| Lachesis_group0__13_contigs__l.g4653  | 363.9559 | 143.6005 | 1.343165 | 0.004178 | 0.025376 | 1362 | - && O36018.1 RecName: Full=Protein bud22 && PF09073:BUD22                                                                                            |
| Lachesis_group0__13_contigs__l.g11538 | 861.0826 | 340.1081 | 1.340887 | 0.009545 | 0.045626 | 4530 | - && Q9URX8.3 RecName: Full=Probable nucleoporin C890.06 && PF03177:Non-repetitive/WGA-negative nucleoporin C-terminal PF08801:Nup133 N terminal like |
| Lachesis_group0__13_contigs__l.g3934  | 166.2078 | 65.7666  | 1.337696 | 0.007585 | 0.039013 | 1008 | - && Q93K00.1 RecName: Full=Haloalkane dehalogenase >Q73Y99.1 RecName: Full=Haloalkane dehalogenase && PF00561:alpha/beta hydrolase fold              |
| Lachesis_group0__13_contigs__l.g4895  | 573.4539 | 227.499  | 1.335121 | 0.005861 | 0.03233  | 1428 | - && Q09747.1 RecName: Full=ATP-dependent RNA helicase dbp5 && PF00271:Helicase conserved C-terminal domain PF00270:DEAD/DEAH box helicase            |
| Lachesis_group0__13_contigs__l.g154   | 294.5747 | 116.7158 | 1.334745 | 0.005229 | 0.029829 | 2223 | - && O74846.2 RecName: Full=Exocyst complex component sec6 && PF06046:Exocyst complex component Sec6                                                  |
| Lachesis_group0__13_contigs__l.g6632  | 432.1606 | 171.7234 | 1.332669 | 0.010249 | 0.048026 | 561  | - && - && PF05620:Protein of unknown function (DUF788)                                                                                                |
| Lachesis_group0__13_contigs__l.g7902  | 401.8148 | 159.4821 | 1.332509 | 0.004867 | 0.028424 | 471  | - && - && PF02136:Nuclear transport factor 2 (NTF2) domain                                                                                            |
| Lachesis_group0__13_contigs__l.g9111  | 743.3764 | 295.383  | 1.331102 | 0.005746 | 0.031875 | 891  | - && Q5ZIM5.1 RecName: Full=Methionine aminopeptidase 1; Short=MAP 1; Short=MetAP 1;                                                                  |

|                                      |          |          |          |          |          |      |                                                                                                                                                                                                    |
|--------------------------------------|----------|----------|----------|----------|----------|------|----------------------------------------------------------------------------------------------------------------------------------------------------------------------------------------------------|
|                                      |          |          |          |          |          |      | AltName: Full=Peptidase M 1 && PF00557:Metallopeptidase family M24                                                                                                                                 |
| Lachesis_group0__13_contigs__l.g6373 | 591.1159 | 235.3266 | 1.330025 | 0.01038  | 0.048454 | 1047 | - && O14295.1 RecName: Full=Pyridoxal reductase; Short=PL reductase; Short=PL-red && PF00248:Aldo/keto reductase family                                                                            |
| Lachesis_group0__13_contigs__l.g2128 | 2139.155 | 851.9373 | 1.328372 | 0.002771 | 0.018953 | 1437 | - && P0CO37.1 RecName: Full=Pre-mRNA-splicing factor ISY1 >P0CO36.1 RecName: Full=Pre-mRNA-splicing factor ISY1 && PF06246:Isy1-like splicing family                                               |
| Lachesis_group0__13_contigs__l.g614  | 403.5583 | 160.7669 | 1.327324 | 0.003463 | 0.022215 | 1326 | - && - && PF12937:F-box-like                                                                                                                                                                       |
| Lachesis_group0__13_contigs__l.g4056 | 1246.27  | 497.1901 | 1.325974 | 0.002025 | 0.01524  | 939  | - && - && PF08790:LYAR-type C2HC zinc finger                                                                                                                                                       |
| Lachesis_group0__13_contigs__l.g5714 | 1318.897 | 526.5298 | 1.325472 | 0.008885 | 0.043675 | 1650 | - && Q9HGM9.1 RecName: Full=DnaJ homolog subfamily C member 7 homolog && PF00226:DnaJ domain PF13414:TPR repeat                                                                                    |
| Lachesis_group0__13_contigs__l.g8057 | 4590.489 | 1836.979 | 1.321331 | 0.00232  | 0.016755 | 2493 | - && J9VQ03.2 RecName: Full=Nucleolar GTP-binding protein 2 && PF01926:50S ribosome-binding GTPase PF01778:Ribosomal L28e protein family PF08153:NGP1NT (NUC091) domain                            |
| Lachesis_group0__13_contigs__l.g8818 | 737.0466 | 294.9099 | 1.321228 | 0.004067 | 0.024976 | 1068 | - && Q9BTE7.1 RecName: Full=DCN1-like protein 5; AltName: Full=DCUN1 domain-containing protein 5; AltName: Full=Defective in cullin neddylation protein 1-like protein 5 && PF03556:Cullin binding |
| Lachesis_group0__13_contigs__l.g7697 | 4866.481 | 1950.967 | 1.318629 | 0.003747 | 0.023456 | 4458 | - && P41820.1 RecName: Full=Brefeldin A resistance protein && PF14510:ABC-transporter extracellular N-terminal PF00005:ABC transporter PF06422:CDR ABC transporter PF01061:ABC-2 type transporter  |

|                                       |          |          |          |          |          |      |                                                                                                                                                                                                                                                                                                                |
|---------------------------------------|----------|----------|----------|----------|----------|------|----------------------------------------------------------------------------------------------------------------------------------------------------------------------------------------------------------------------------------------------------------------------------------------------------------------|
| Lachesis_group0__13_contigs__l.g1561  | 511.2893 | 205.4037 | 1.317245 | 0.008182 | 0.041232 | 1740 | - && - && PF08512:Histone chaperone Rtt106-like                                                                                                                                                                                                                                                                |
| Lachesis_group0__13_contigs__l.g11343 | 2549.717 | 1025.264 | 1.31435  | 0.002418 | 0.017292 | 852  | - && Q5UNW1.1 RecName: Full=Uncharacterized protein R707 && PF01501:Glycosyl transferase family 8                                                                                                                                                                                                              |
| Lachesis_group0__13_contigs__l.g7115  | 783.58   | 316.4892 | 1.308241 | 0.008755 | 0.043238 | 3408 | - && - && PF00249:Myb-like DNA-binding domain                                                                                                                                                                                                                                                                  |
| Lachesis_group0__13_contigs__l.g10205 | 3801.579 | 1541.949 | 1.302023 | 0.004633 | 0.027347 | 3258 | - && O14134.1 RecName: Full=mRNA export factor elf1 && PF00385:Chromo (CHRromatin Organisation MOdifier) domain PF00005:ABC transporter                                                                                                                                                                        |
| Lachesis_group0__13_contigs__l.g1484  | 1095.904 | 444.7764 | 1.301547 | 0.003758 | 0.023501 | 2811 | - && Q9USU2.1 RecName: Full=Dimethyladenosine transferase; AltName: Full=18S rRNA (adenine(1779)-N(6)/adenine(1780)-N(6))-dimethyltransferase; AltName: Full=18S rRNA dimethylase; AltName: Full=S-adenosylmethionine-6-N', N'-adenosyl(rRNA) dimethyltransferase && PF00398:Ribosomal RNA adenine dimethylase |
| Lachesis_group0__13_contigs__l.g11556 | 362.4929 | 146.9479 | 1.301489 | 0.007788 | 0.039816 | 2472 | - && - && PF16589:BRCT domain, a BRCA1 C-terminus domain                                                                                                                                                                                                                                                       |
| Lachesis_group0__13_contigs__l.g2918  | 928.5543 | 377.2121 | 1.299934 | 0.007539 | 0.038888 | 3672 | - && P22579.2 RecName: Full=Transcriptional regulatory protein SIN3 && PF16879:C-terminal domain of Sin3a protein PF08295:Sin3 family co-repressor PF02671:Paired amphipathic helix repeat                                                                                                                     |
| Lachesis_group0__13_contigs__l.g11711 | 725.5318 | 294.9137 | 1.298952 | 0.00991  | 0.046904 | 1611 | - && P34078.2 RecName: Full=Protein LTV1; AltName: Full=Low-temperature viability protein 1 && PF04180:Low temperature viability protein                                                                                                                                                                       |
| Lachesis_group0__13_contigs__l.g2997  | 251.6024 | 102.3956 | 1.298946 | 0.0073   | 0.037999 | 1302 | - && A8NZM5.2 RecName: Full=WD repeat-containing protein JIP5 && -                                                                                                                                                                                                                                             |

|                                       |          |          |          |          |          |      |                                                                                                                                                                                                                                                                 |
|---------------------------------------|----------|----------|----------|----------|----------|------|-----------------------------------------------------------------------------------------------------------------------------------------------------------------------------------------------------------------------------------------------------------------|
| Lachesis_group0__13_contigs__l.g4265  | 3458.014 | 1410.717 | 1.293666 | 0.003116 | 0.020551 | 3723 | - && P35210.2 RecName: Full=Protein SPT23 && PF01833:IPT/TIG domain PF12796:Ankyrin repeats (3 copies)                                                                                                                                                          |
| Lachesis_group0__13_contigs__l.g9657  | 210.0297 | 85.7778  | 1.293588 | 0.009931 | 0.046978 | 4182 | - && P0CT89.1 RecName: Full=4-O-methyltransferase 1; Short=Mtrase 1 && PF00481:Protein phosphatase 2C PF00891:O-methyltransferase                                                                                                                               |
| Lachesis_group0__13_contigs__l.g2942  | 391.4077 | 159.6765 | 1.292324 | 0.009799 | 0.046639 | 471  | - && O23310.1 RecName: Full=Nuclear transcription factor Y subunit B-3; Short=AtNF-YB-3; AltName: Full=Transcriptional activator HAP3C && PF00808:Histone-like transcription factor (CBF/NF-Y) and archaeal histone                                             |
| Lachesis_group0__13_contigs__l.g7227  | 505.6776 | 206.9134 | 1.290346 | 0.006206 | 0.033729 | 1647 | - && P0CR02.1 RecName: Full=ATP-dependent RNA helicase DBP8 && PF00270:DEAD/DEAH box helicase PF00271:Helicase conserved C-terminal domain                                                                                                                      |
| Lachesis_group0__13_contigs__l.g5716  | 600.7409 | 245.987  | 1.289374 | 0.006609 | 0.035167 | 807  | - && Q8TG11.1 RecName: Full=Casein kinase II subunit beta-2; Short=CK II beta-2 && PF01214:Casein kinase II regulatory subunit                                                                                                                                  |
| Lachesis_group0__13_contigs__l.g11536 | 500.5176 | 205.0108 | 1.288976 | 0.008209 | 0.041293 | 1548 | - && O13681.2 RecName: Full=Integral inner nuclear membrane protein ima1 && PF09779:Ima1 N-terminal domain                                                                                                                                                      |
| Lachesis_group0__13_contigs__l.g5802  | 6183.914 | 2530.921 | 1.288956 | 0.007391 | 0.038268 | 1218 | - && P78827.2 RecName: Full=Probable ketol-acid reductoisomerase, mitochondrial; AltName: Full=Acetohydroxy-acid reductoisomerase; AltName: Full=Alpha-keto-beta-hydroxylacyl reductoisomerase; Flags: Precursor && PF07991:Acetohydroxy acid isomeroreductase, |

|                                       |          |          |          |          |          |      |                                                                                                                                                                                                                                                                                                                                                                                                                   |
|---------------------------------------|----------|----------|----------|----------|----------|------|-------------------------------------------------------------------------------------------------------------------------------------------------------------------------------------------------------------------------------------------------------------------------------------------------------------------------------------------------------------------------------------------------------------------|
|                                       |          |          |          |          |          |      | NADPH-binding domain PF01450:Acetohydroxy acid isomeroeductase, catalytic domain                                                                                                                                                                                                                                                                                                                                  |
| Lachesis_group0__13_contigs__l.g10015 | 181.8455 | 74.54097 | 1.288234 | 0.006585 | 0.035079 | 1134 | - && Q54WW4.1 RecName: Full=Putative isoaspartyl peptidase/L-asparaginase; AltName: Full=Beta-aspartyl-peptidase; AltName: Full=Isoaspartyl dipeptidase; AltName: Full=L-asparagine amidohydrolase; Contains: RecName: Full=Putative isoaspartyl peptidase/L-asparaginase alpha chain; Contains: RecName: Full=Putative isoaspartyl peptidase/L-asparaginase beta chain; Flags: Precursor && PF01112:Asparaginase |
| Lachesis_group0__13_contigs__l.g7293  | 1319.386 | 540.3149 | 1.28816  | 0.003188 | 0.02093  | 1956 | - && Q9USP8.2 RecName: Full=Isocitrate dehydrogenase [NAD] subunit 2, mitochondrial; AltName: Full=Isocitric dehydrogenase; AltName: Full=NAD(+)-specific ICDH; Flags: Precursor && PF03357:Snf7 PF00180:Isocitrate/isopropylmalate dehydrogenase                                                                                                                                                                 |
| Lachesis_group0__13_contigs__l.g5846  | 1007.195 | 412.8948 | 1.287193 | 0.00842  | 0.042102 | 1311 | - && Q10234.1 RecName: Full=Probable 37S ribosomal protein S5, mitochondrial && PF00333:Ribosomal protein S5, N-terminal domain PF03719:Ribosomal protein S5, C-terminal domain                                                                                                                                                                                                                                   |
| Lachesis_group0__13_contigs__l.g11314 | 325.7577 | 133.6241 | 1.286101 | 0.008205 | 0.041292 | 1281 | - && Q7XUF4.2 RecName: Full=Cyclin-dependent kinase G-2; Short=CDKG;2 >A2XUW1.1 RecName: Full=Cyclin-dependent kinase G-2; Short=CDKG;2 && PF00069:Protein kinase domain                                                                                                                                                                                                                                          |
| Lachesis_group0__13_contigs__l.g4714  | 202.2851 | 82.89329 | 1.285663 | 0.008559 | 0.042587 | 1575 | - && Q86XW9.1 RecName: Full=Thioredoxin domain-containing protein 6; AltName:                                                                                                                                                                                                                                                                                                                                     |

|                                       |          |          |          |          |          |      |                                                                                                                                                                                                                                          |
|---------------------------------------|----------|----------|----------|----------|----------|------|------------------------------------------------------------------------------------------------------------------------------------------------------------------------------------------------------------------------------------------|
|                                       |          |          |          |          |          |      | Full=Thioredoxin-like protein 2; Short=Txl-2 && PF00334:Nucleoside diphosphate kinase                                                                                                                                                    |
| Lachesis_group0__13_contigs__l.g11127 | 1183.514 | 486.5131 | 1.282635 | 0.007122 | 0.037281 | 663  | - && Q6AXT8.1 RecName: Full=Splicing factor 3A subunit 2 && PF12874:Zinc-finger of C2H2 type PF16835:Pre-mRNA-splicing factor SF3a complex subunit 2 (Prp11)                                                                             |
| Lachesis_group0__13_contigs__l.g7292  | 4151.705 | 1708.09  | 1.281235 | 0.002379 | 0.017083 | 4416 | - && Q5AK62.1 RecName: Full=Virulence protein SSD1 && PF00773:RNB domain                                                                                                                                                                 |
| Lachesis_group0__13_contigs__l.g4823  | 666.0084 | 274.3788 | 1.2804   | 0.006275 | 0.033969 | 1032 | - && Q12000.2 RecName: Full=Translation machinery-associated protein 46; AltName: Full=DRG family-regulatory protein 1 && PF16543:DRG Family Regulatory Proteins, Tma46 PF00642:Zinc finger C-x8-C-x5-C-x3-H type (and similar)          |
| Lachesis_group0__13_contigs__l.g7248  | 1824.74  | 751.6193 | 1.279888 | 0.003401 | 0.021953 | 1542 | - && Q09100.2 RecName: Full=RNA-binding protein rnp24 && PF14259:RNA recognition motif (a.k.a. RRM, RBD, or RNP domain)                                                                                                                  |
| Lachesis_group0__13_contigs__l.g6099  | 964.0793 | 397.2718 | 1.279571 | 0.006443 | 0.034563 | 2862 | - && Q52KI8.2 RecName: Full=Serine/arginine repetitive matrix protein 1; AltName: Full=Plenty-of-prolines 101 && PF03443:Glycosyl hydrolase family 61 PF00734:Fungal cellulose binding domain PF01480:PWI domain                         |
| Lachesis_group0__13_contigs__l.g9189  | 1783.076 | 734.6053 | 1.279288 | 0.009206 | 0.044634 | 4656 | - && Q92373.1 RecName: Full=Replication factor A protein 2; AltName: Full=Single-stranded DNA-binding protein P30 subunit && PF09797:N-acetyltransferase B complex (NatB) non catalytic subunit PF08784:Replication protein A C terminal |

|                                      |          |          |          |          |          |      |                                                                                                                                                                                               |
|--------------------------------------|----------|----------|----------|----------|----------|------|-----------------------------------------------------------------------------------------------------------------------------------------------------------------------------------------------|
| Lachesis_group0__13_contigs__l.g7070 | 296.5335 | 122.2508 | 1.279195 | 0.00535  | 0.030339 | 1314 | - && Q4P2E8.1 RecName: Full=Actin-related protein 4; AltName: Full=Actin-like protein ARP4; Short=Actin-like protein 4 && PF00022:Actin                                                       |
| Lachesis_group0__13_contigs__l.g6030 | 1980.194 | 816.8565 | 1.277297 | 0.006448 | 0.034563 | 1266 | - && O60158.2 RecName: Full=Bouquet formation protein 4 && -                                                                                                                                  |
| Lachesis_group0__13_contigs__l.g929  | 287.2331 | 118.7158 | 1.276203 | 0.007195 | 0.037588 | 708  | - && - && PF13414:TPR repeat                                                                                                                                                                  |
| Lachesis_group0__13_contigs__l.g1509 | 6303.114 | 2603.762 | 1.275408 | 0.004129 | 0.025256 | 3957 | - && Q90YK3.1 RecName: Full=L-gulonolactone oxidase; Short=LGO; AltName: Full=L-gulono-gamma-lactone oxidase; Short=GLO && PF04030:D-arabinono-1,4-lactone oxidase PF01565:FAD binding domain |
| Lachesis_group0__13_contigs__l.g9479 | 443.5792 | 183.5248 | 1.27442  | 0.005278 | 0.030054 | 2001 | - && P42698.2 RecName: Full=DNA-damage-repair/toleration protein DRT111, chloroplastic; AltName: Full=REQUIRED FOR SNC4-1D protein 2; Flags: Precursor && PF01585:G-patch domain              |
| Lachesis_group0__13_contigs__l.g442  | 1500.765 | 622.2336 | 1.270318 | 0.002575 | 0.017985 | 1125 | - && P46794.2 RecName: Full=Cystathionine beta-synthase; AltName: Full=Beta-thionase; AltName: Full=Serine sulfhydrase && PF00291:Pyridoxal-phosphate dependent enzyme                        |
| Lachesis_group0__13_contigs__l.g6034 | 1417.544 | 588.989  | 1.266993 | 0.00246  | 0.017484 | 1566 | - && B6H9U8.1 RecName: Full=Secondary metabolism regulator laeA; AltName: Full=Methyltransferase laeA; AltName: Full=Velvet complex subunit laeA && PF12847:Methyltransferase domain          |
| Lachesis_group0__13_contigs__l.g4804 | 414.7341 | 172.5284 | 1.266421 | 0.010344 | 0.048392 | 843  | - && P22143.1 RecName: Full=Cyanamide hydratase; AltName: Full=Urea hydro-lyase && PF01966:HD domain                                                                                          |

|                                       |          |          |          |          |          |      |                                                                                                                                                                                                                                                                                                                                                                 |
|---------------------------------------|----------|----------|----------|----------|----------|------|-----------------------------------------------------------------------------------------------------------------------------------------------------------------------------------------------------------------------------------------------------------------------------------------------------------------------------------------------------------------|
| Lachesis_group0__13_contigs__l.g10136 | 365.5546 | 152.431  | 1.263756 | 0.009476 | 0.045497 | 1980 | - && Q8WZM0.1 RecName: Full=Histone acetyltransferase GCN5 && PF00439:Bromodomain                                                                                                                                                                                                                                                                               |
| Lachesis_group0__13_contigs__l.g5936  | 2871.471 | 1199.451 | 1.259472 | 0.009426 | 0.045354 | 3354 | - && P0CQ17.1 RecName: Full=Lon protease homolog, mitochondrial; Flags: Precursor && PF05362:Lon protease (S16) C-terminal proteolytic domain PF02190:ATP-dependent protease La (LON) substrate-binding domain PF00004:ATPase family associated with various cellular activities (AAA)                                                                          |
| Lachesis_group0__13_contigs__l.g10030 | 1484.406 | 620.6555 | 1.258028 | 0.002273 | 0.01651  | 3561 | - && P07527.1 RecName: Full=Mitosis inhibitor protein kinase wee1; AltName: Full=P107 protein kinase homolog && PF00069:Protein kinase domain                                                                                                                                                                                                                   |
| Lachesis_group0__13_contigs__l.g4840  | 694.8952 | 290.8347 | 1.25709  | 0.005554 | 0.031189 | 1068 | - && Q8FKG1.1 RecName: Full=S-(hydroxymethyl)glutathione dehydrogenase; AltName: Full=Alcohol dehydrogenase class-3; AltName: Full=Alcohol dehydrogenase class-III; AltName: Full=Glutathione-dependent formaldehyde dehydrogenase; Short=FALDH; Short=FDH; Short=GSH-FDH && PF00107:Zinc-binding dehydrogenase PF08240:Alcohol dehydrogenase GroES-like domain |
| Lachesis_group0__13_contigs__l.g5520  | 1456.548 | 609.1912 | 1.257063 | 0.009024 | 0.044017 | 2559 | - && G3XMC9.1 RecName: Full=Efflux pump azaL; AltName: Full=Azaphilone biosynthesis cluster protein azaL && PF07690:Major Facilitator Superfamily                                                                                                                                                                                                               |
| Lachesis_group0__13_contigs__l.g9032  | 530.9165 | 222.2539 | 1.255626 | 0.00346  | 0.022215 | 684  | - && - && PF04750:FAR-17a/AIG1-like protein                                                                                                                                                                                                                                                                                                                     |



|                                       |          |          |          |          |          |      |                                                                                                                                                                                                                                                                                                                                                                                |
|---------------------------------------|----------|----------|----------|----------|----------|------|--------------------------------------------------------------------------------------------------------------------------------------------------------------------------------------------------------------------------------------------------------------------------------------------------------------------------------------------------------------------------------|
| Lachesis_group0__13_contigs__l.g10345 | 7505.918 | 3144.762 | 1.255143 | 0.005432 | 0.030694 | 2631 | - && Q4P0P0.1 RecName: Full=Eukaryotic translation initiation factor 3 subunit C; Short=eIF3c; AltName: Full=Eukaryotic translation initiation factor 3 93 kDa subunit homolog; Short=eIF3 p93; AltName: Full=Translation initiation factor eIF3, p93 subunit homolog && PF01399:PCI domain PF05470:Eukaryotic translation initiation factor 3 subunit 8 N-terminus            |
| Lachesis_group0__13_contigs__l.g11275 | 1206.869 | 506.5056 | 1.252421 | 0.009228 | 0.044634 | 1038 | - && Q6DHC3.1 RecName: Full=Solute carrier family 25 member 40 && PF00153:Mitochondrial carrier protein                                                                                                                                                                                                                                                                        |
| Lachesis_group0__13_contigs__l.g5574  | 1329.938 | 559.1093 | 1.25035  | 0.008494 | 0.042379 | 3603 | - && P53621.2 RecName: Full=Coatomer subunit alpha; AltName: Full=Alpha-coat protein; Short=Alpha-COP; AltName: Full=HEP-COP; Short=HEPCOP; Contains: RecName: Full=Xenin; AltName: Full=Xenopsin-related peptide; Contains: RecName: Full=Proxenin && PF04053:Coatomer WD associated region PF00400:WD domain, G-beta repeat PF06957:Coatomer (COPI) alpha subunit C-terminus |
| Lachesis_group0__13_contigs__l.g8806  | 18255.56 | 7673.926 | 1.250348 | 0.010373 | 0.048444 | 2385 | - && Q10284.2 RecName: Full=Heat shock protein sks2; AltName: Full=Heat shock cognate protein hsc1 && PF08286:Spc24 subunit of Ndc80 PF00012:Hsp70 protein PF10712:NAD-specific glutamate dehydrogenase                                                                                                                                                                        |

|                                      |          |          |          |          |          |      |                                                                                                                                                                                                          |
|--------------------------------------|----------|----------|----------|----------|----------|------|----------------------------------------------------------------------------------------------------------------------------------------------------------------------------------------------------------|
| Lachesis_group0__13_contigs__l.g1284 | 1280.486 | 538.7214 | 1.248721 | 0.006053 | 0.033109 | 768  | - && Q4PHE4.1 RecName: Full=Histone H2A.Z && PF16211:C-terminus of histone H2A PF00125:Core histone H2A/H2B/H3/H4                                                                                        |
| Lachesis_group0__13_contigs__l.g172  | 331.3675 | 139.7971 | 1.244916 | 0.005567 | 0.031189 | 2793 | - && - && PF04082:Fungal specific transcription factor domain                                                                                                                                            |
| Lachesis_group0__13_contigs__l.g2477 | 679.611  | 288.4727 | 1.235818 | 0.004863 | 0.028413 | 4005 | - && D7PI00.1 RecName: Full=Transcription factor vrtR1; AltName: Full=Viridicatumtoxin synthesis protein R1 && PF04082:Fungal specific transcription factor domain                                       |
| Lachesis_group0__13_contigs__l.g5380 | 760.1328 | 323.1382 | 1.234313 | 0.004166 | 0.025344 | 1911 | - && Q6PD26.3 RecName: Full=GPI transamidase component PIG-S; AltName: Full=Phosphatidylinositol-glycan biosynthesis class S protein && PF10510:Phosphatidylinositol-glycan biosynthesis class S protein |
| Lachesis_group0__13_contigs__l.g1758 | 660.2894 | 280.8307 | 1.232745 | 0.008976 | 0.043868 | 1032 | - && Q09923.1 RecName: Full=Aldo-keto reductase yakc [NADP(+)] && PF00248:Aldo/keto reductase family                                                                                                     |
| Lachesis_group0__13_contigs__l.g9043 | 761.1279 | 324.3585 | 1.230694 | 0.007783 | 0.039807 | 1659 | - && Q9UTB4.1 RecName: Full=Protein mss51 && PF13824:Zinc-finger of mitochondrial splicing suppressor 51                                                                                                 |
| Lachesis_group0__13_contigs__l.g3987 | 8607.012 | 3671.194 | 1.229254 | 0.006018 | 0.032985 | 987  | - && - && PF07716:Basic region leucine zipper                                                                                                                                                            |
| Lachesis_group0__13_contigs__l.g649  | 1109.751 | 474.3147 | 1.226964 | 0.006407 | 0.034442 | 1986 | - && P10961.1 RecName: Full=Heat shock factor protein; Short=HSF; AltName: Full=Heat shock transcription factor; Short=HSTF && PF00447:HSF-type DNA-binding                                              |
| Lachesis_group0__13_contigs__l.g952  | 755.6612 | 322.6724 | 1.226819 | 0.005707 | 0.03172  | 2928 | - && Q3ZLR7.2 RecName: Full=Transcription factor SPT20 homolog-like 1 && PF12090:Spt20 family                                                                                                            |

|                                       |          |          |          |          |          |      |                                                                                                                                                                                                                                                                                                                                                                                                         |
|---------------------------------------|----------|----------|----------|----------|----------|------|---------------------------------------------------------------------------------------------------------------------------------------------------------------------------------------------------------------------------------------------------------------------------------------------------------------------------------------------------------------------------------------------------------|
| Lachesis_group0__13_contigs__l.g11446 | 5447.182 | 2340.643 | 1.218672 | 0.004507 | 0.026781 | 2397 | - && P26651.1 RecName: Full=mRNA decay activator protein ZFP36; AltName: Full=G0/G1 switch regulatory protein 24; AltName: Full=Growth factor-inducible nuclear protein NUP475; AltName: Full=Tristetraprolin; AltName: Full=Zinc finger protein 36; Short=Zfp-36 && PF00642:Zinc finger C-x8-C-x5-C-x3-H type (and similar)                                                                            |
| Lachesis_group0__13_contigs__l.g8611  | 936.2173 | 402.7384 | 1.217379 | 0.006452 | 0.034567 | 495  | - && P53937.1 RecName: Full=37S ribosomal protein SWS2, mitochondrial; AltName: Full=Sick without securin protein 2 && PF00416:Ribosomal protein S13/S18                                                                                                                                                                                                                                                |
| Lachesis_group0__13_contigs__l.g7496  | 1632.119 | 704.1209 | 1.213108 | 0.009321 | 0.044968 | 1458 | - && - && PF09350:Domain of unknown function (DUF1992)                                                                                                                                                                                                                                                                                                                                                  |
| Lachesis_group0__13_contigs__l.g5848  | 4158.701 | 1796.159 | 1.211172 | 0.004352 | 0.026166 | 1026 | - && Q3E6T0.1 RecName: Full=Probable sugar phosphate/phosphate translocator At5g25400 && PF03151:Triose-phosphate Transporter family                                                                                                                                                                                                                                                                    |
| Lachesis_group0__13_contigs__l.g9217  | 3832.553 | 1665.911 | 1.202161 | 0.009455 | 0.045433 | 3567 | - && Q5KPJ5.1 RecName: Full=Acetolactate synthase, mitochondrial; AltName: Full=AHAS; AltName: Full=ALS; AltName: Full=Acetohydroxy-acid synthase; Flags: Precursor && PF02153:Prephenate dehydrogenase PF02776:Thiamine pyrophosphate enzyme, N-terminal TPP binding domain PF00205:Thiamine pyrophosphate enzyme, central domain PF02775:Thiamine pyrophosphate enzyme, C-terminal TPP binding domain |

|                                      |          |          |          |          |          |      |                                                                                                                                                                                                                                                                                                                                                                                                                     |
|--------------------------------------|----------|----------|----------|----------|----------|------|---------------------------------------------------------------------------------------------------------------------------------------------------------------------------------------------------------------------------------------------------------------------------------------------------------------------------------------------------------------------------------------------------------------------|
| Lachesis_group0__13_contigs__l.g7152 | 1949.243 | 851.2817 | 1.195099 | 0.009693 | 0.04623  | 720  | - && O42901.3 RecName: Full=Uncharacterized protein C119.09c && PF04061:ORMDL family                                                                                                                                                                                                                                                                                                                                |
| Lachesis_group0__13_contigs__l.g7095 | 2441.035 | 1066.895 | 1.194195 | 0.005771 | 0.031968 | 4932 | - && A8NWR2.2 RecName: Full=Ribosome biogenesis protein ERB1; AltName: Full=Eukaryotic ribosome biogenesis protein 1 && PF08145:BOP1NT (NUC169) domain                                                                                                                                                                                                                                                              |
| Lachesis_group0__13_contigs__l.g3770 | 1423.937 | 624.7756 | 1.188443 | 0.009907 | 0.046904 | 2328 | - && A8P1W0.1 RecName: Full=Elongation factor G, mitochondrial; Short=EF-Gmt; AltName: Full=Elongation factor G 1, mitochondrial; Short=mEF-G 1; AltName: Full=Elongation factor G1; Flags: Precursor && PF03144:Elongation factor Tu domain 2 PF03764:Elongation factor G, domain IV PF00009:Elongation factor Tu GTP binding domain PF00679:Elongation factor G C-terminus PF14492:Elongation Factor G, domain II |
| Lachesis_group0__13_contigs__l.g6232 | 337.6014 | 148.5303 | 1.186398 | 0.009482 | 0.0455   | 6039 | - && - && PF11707:Ribosome 60S biogenesis N-terminal PF16201:Nucleolar pre-ribosomal-associated protein 1                                                                                                                                                                                                                                                                                                           |
| Lachesis_group0__13_contigs__l.g6407 | 3213.182 | 1413.093 | 1.185416 | 0.010134 | 0.047671 | 1485 | - && P49605.2 RecName: Full=cAMP-dependent protein kinase regulatory subunit; Short=PKA regulatory subunit && PF02197:Regulatory subunit of type II PKA R-subunit PF00027:Cyclic nucleotide-binding domain                                                                                                                                                                                                          |
| Lachesis_group0__13_contigs__l.g5167 | 1601.921 | 704.7741 | 1.184887 | 0.009452 | 0.045433 | 3771 | - && Q1K8G0.1 RecName: Full=Cystathionine beta-lyase && PF01053:Cys/Met metabolism PLP-dependent enzyme PF00288:GHMP kinases N terminal domain                                                                                                                                                                                                                                                                      |

|                                       |          |          |          |          |          |      |                                                                                                                                                                                                                                                                                                                                                                                 |
|---------------------------------------|----------|----------|----------|----------|----------|------|---------------------------------------------------------------------------------------------------------------------------------------------------------------------------------------------------------------------------------------------------------------------------------------------------------------------------------------------------------------------------------|
| Lachesis_group0__13_contigs__l.g6530  | 752.587  | 331.72   | 1.182165 | 0.003967 | 0.024486 | 1506 | - && B0CXQ2.1 RecName: Full=Velvet complex subunit B && PF11754:Velvet factor                                                                                                                                                                                                                                                                                                   |
| Lachesis_group0__13_contigs__l.g11291 | 2578.652 | 1139.366 | 1.178291 | 0.003445 | 0.022173 | 1440 | - && C4YR54.1 RecName: Full=G1/S-specific cyclin CCN1 >P0CY18.1 RecName: Full=G1/S-specific cyclin CLN1 && PF00134:Cyclin, N-terminal domain PF02984:Cyclin, C-terminal domain                                                                                                                                                                                                  |
| Lachesis_group0__13_contigs__l.g5233  | 884.2545 | 391.2824 | 1.176272 | 0.006484 | 0.034697 | 3033 | - && Q09825.1 RecName: Full=Spindle pole body-associated protein sad1 && PF07738:Sad1 / UNC-like C-terminal                                                                                                                                                                                                                                                                     |
| Lachesis_group0__13_contigs__l.g11049 | 14464.23 | 6402.931 | 1.175674 | 0.005077 | 0.029215 | 4146 | - && Q9HGM3.1 RecName: Full=Mitochondrial respiratory chain complexes assembly protein rca1 && PF01434:Peptidase family M41 PF00004:ATPase family associated with various cellular activities (AAA) PF00328:Histidine phosphatase superfamily (branch 2) PF06480:FtsH Extracellular                                                                                             |
| Lachesis_group0__13_contigs__l.g5900  | 3725.08  | 1660.585 | 1.165589 | 0.005289 | 0.030102 | 2928 | - && Q03516.1 RecName: Full=Uncharacterized protein RSN1; AltName: Full=Rescuer of SRO7 at high Nacl protein 1 && PF02714:Calcium-dependent channel, 7TM region, putative phosphate PF13967:Late exocytosis, associated with Golgi transport PF12621:Extracellular tail, of 10TM putative phosphate transporter PF14703:Cytosolic domain of 10TM putative phosphate transporter |
| Lachesis_group0__13_contigs__l.g1162  | 428.1837 | 190.989  | 1.164346 | 0.006356 | 0.034286 | 4830 | - && Q9UTL9.1 RecName: Full=Uncharacterized ATP-dependent helicase C144.05 && PF00176:SNF2 family N-terminal                                                                                                                                                                                                                                                                    |

|                                       |          |          |          |          |          |      |                                                                                                                                                                                       |
|---------------------------------------|----------|----------|----------|----------|----------|------|---------------------------------------------------------------------------------------------------------------------------------------------------------------------------------------|
|                                       |          |          |          |          |          |      | domain PF13920:Zinc finger, C3HC4 type (RING finger)                                                                                                                                  |
| Lachesis_group0__13_contigs__l.g6229  | 1095.663 | 489.9244 | 1.161528 | 0.007754 | 0.039697 | 3714 | - && O14306.2 RecName: Full=Probable inositol polyphosphate 5-phosphatase C9G1.10c && PF03372:Endonuclease/Exonuclease/phosphatase family                                             |
| Lachesis_group0__13_contigs__l.g2914  | 380.772  | 170.3286 | 1.160841 | 0.008105 | 0.040977 | 942  | - && Q9RA05.1 RecName: Full=(-)-trans-carveol dehydrogenase; AltName: Full=(4R,6S)-carveol dehydrogenase; Short=CDH; Short=Carveol dehydrogenase && PF00106:short chain dehydrogenase |
| Lachesis_group0__13_contigs__l.g2245  | 1379.396 | 618.8326 | 1.156556 | 0.008114 | 0.041    | 669  | - && Q08971.1 RecName: Full=Protein PBDC1 homolog && PF04669:Polysaccharide biosynthesis                                                                                              |
| Lachesis_group0__13_contigs__l.g1579  | 7584.908 | 3408.159 | 1.154214 | 0.010029 | 0.047319 | 486  | - && O94083.1 RecName: Full=Eukaryotic translation initiation factor 5A; Short=eIF-5A; AltName: Full=eIF-4D && PF01287:Eukaryotic elongation factor 5A hypusine, DNA-binding OB fold  |
| Lachesis_group0__13_contigs__l.g10985 | 2583.272 | 1174.538 | 1.137275 | 0.008977 | 0.043868 | 603  | - && Q9P720.1 RecName: Full=60S ribosomal protein L16; AltName: Full=Cytoplasmic ribosomal protein 46 && PF00572:Ribosomal protein L13                                                |
| Lachesis_group0__13_contigs__l.g8860  | 2189.901 | 1003.017 | 1.126641 | 0.01017  | 0.047778 | 1764 | - && P0CR57.1 RecName: Full=Pre-mRNA-processing protein 45 && PF02731:SKIP/SNW domain                                                                                                 |
| Lachesis_group0__13_contigs__l.g5528  | 2758.601 | 1273.448 | 1.115378 | 0.006258 | 0.033923 | 2847 | - && Q4P9K4.1 RecName: Full=Protein transport protein SEC24 && PF04810:Sec23/Sec24 zinc finger PF00626:Gelsolin repeat PF04811:Sec23/Sec24 trunk                                      |

|                                       |          |          |          |          |          |      |                                                                                                                                                                                                                                                 |
|---------------------------------------|----------|----------|----------|----------|----------|------|-------------------------------------------------------------------------------------------------------------------------------------------------------------------------------------------------------------------------------------------------|
|                                       |          |          |          |          |          |      | domain PF00397:WW                                                                                                                                                                                                                               |
|                                       |          |          |          |          |          |      | domain PF04815:Sec23/Sec24 helical                                                                                                                                                                                                              |
|                                       |          |          |          |          |          |      | domain PF08033:Sec23/Sec24 beta-sandwich                                                                                                                                                                                                        |
|                                       |          |          |          |          |          |      | domain                                                                                                                                                                                                                                          |
| Lachesis_group0__13_contigs__l.g10253 | 1175.637 | 543.418  | 1.113552 | 0.007359 | 0.038137 | 3396 | - && O60111.2 RecName: Full=ABC1 family protein MCP2 homolog; Flags: Precursor && PF03109:ABC1 family PF00566:Rab-GTPase-TBC domain                                                                                                             |
| Lachesis_group0__13_contigs__l.g243   | 2684.74  | 1240.949 | 1.113417 | 0.005517 | 0.030999 | 546  | - && P34737.1 RecName: Full=40S ribosomal protein S15; AltName: Full=S12 && PF00203:Ribosomal protein S19                                                                                                                                       |
| Lachesis_group0__13_contigs__l.g4547  | 399.5754 | 184.8637 | 1.112303 | 0.008839 | 0.043564 | 1866 | - && Q9HGM6.1 RecName: Full=Putative transporter C543.05c && PF00955:HCO3-transporter family                                                                                                                                                    |
| Lachesis_group0__13_contigs__l.g5546  | 1315.197 | 613.9041 | 1.099109 | 0.009356 | 0.045097 | 3516 | - && Q10097.1 RecName: Full=Uncharacterized transporter C11D3.18C && PF00076:RNA recognition motif. (a.k.a. RRM, RBD, or RNP domain) PF07690:Major Facilitator Superfamily                                                                      |
| Lachesis_group0__13_contigs__l.g2552  | 354.8182 | 167.2204 | 1.085015 | 0.0106   | 0.049229 | 1320 | - && Q8VYR0.1 RecName: Full=Calcium uniporter protein 5, mitochondrial; Flags: Precursor && PF04678:Mitochondrial calcium uniporter                                                                                                             |
| Lachesis_group0__13_contigs__l.g4085  | 1791.793 | 850.5205 | 1.075186 | 0.008718 | 0.043156 | 2712 | - && P04786.2 RecName: Full=DNA topoisomerase 1; AltName: Full=DNA topoisomerase I; AltName: Full=Maintenance of killer protein 1 && PF01028:Eukaryotic DNA topoisomerase I, catalytic core PF02919:Eukaryotic DNA topoisomerase I, DNA binding |

|                                      |          |          |          |          |          |      |                                                                                                                                                                                                                                                           |                      |
|--------------------------------------|----------|----------|----------|----------|----------|------|-----------------------------------------------------------------------------------------------------------------------------------------------------------------------------------------------------------------------------------------------------------|----------------------|
|                                      |          |          |          |          |          |      | fragment PF14370:C-terminal domain                                                                                                                                                                                                                        | topoisomerase domain |
| Lachesis_group0__13_contigs__l.g9247 | 3942.627 | 1873.574 | 1.073353 | 0.009798 | 0.046639 | 1197 | - && Q10489.1 RecName: Full=Pyruvate dehydrogenase E1 component subunit alpha, mitochondrial; Short=PDHE1-A; Flags: Precursor && PF00676:Dehydrogenase E1 component                                                                                       |                      |
| Lachesis_group0__13_contigs__l.g9001 | 10445.46 | 5040.054 | 1.05138  | 0.007546 | 0.038889 | 1695 | - && Q9C0U9.1 RecName: Full=Uncharacterized transporter PB1C11.03 && PF07690:Major Facilitator Superfamily                                                                                                                                                |                      |
| Lachesis_group0__13_contigs__l.g4676 | 1368.678 | 2905.35  | -1.08598 | 0.005892 | 0.032456 | 1284 | - && P24280.3 RecName: Full=SEC14 cytosolic factor; AltName: Full=Phosphatidylinositol/phosphatidylcholine transfer protein; Short=PI/PC TP && PF03765:CRAL/TRIO, N-terminal domain PF00650:CRAL/TRIO domain                                              |                      |
| Lachesis_group0__13_contigs__l.g8949 | 5375.228 | 11449.27 | -1.09088 | 0.010142 | 0.047691 | 3288 | - && O75003.1 RecName: Full=Trehalose phosphorylase; AltName: Full=Trehalose synthase; Short=TSase; Flags: Precursor && PF00534:Glycosyl transferases group 1                                                                                             |                      |
| Lachesis_group0__13_contigs__l.g9368 | 3320.763 | 7123.435 | -1.10109 | 0.010471 | 0.048753 | 3288 | - && P13860.1 RecName: Full=Exoglucanase 1; AltName: Full=1,4-beta-cellobiohydrolase; AltName: Full=Exocellobiohydrolase I; AltName: Full=Exoglucanase I; Flags: Precursor && PF00840:Glycosyl hydrolase family 7 PF00734:Fungal cellulose binding domain |                      |
| Lachesis_group0__13_contigs__l.g6742 | 578.9254 | 1257.214 | -1.11891 | 0.007916 | 0.040225 | 798  | - && O14351.1 RecName: Full=Uncharacterized oxidoreductase C30D10.05c && PF00106:short chain dehydrogenase                                                                                                                                                |                      |



|                                      |          |          |          |          |          |      |                                                                                                                                                                                                                                                                          |
|--------------------------------------|----------|----------|----------|----------|----------|------|--------------------------------------------------------------------------------------------------------------------------------------------------------------------------------------------------------------------------------------------------------------------------|
| Lachesis_group0__13_contigs__l.g9432 | 7572.525 | 16491.88 | -1.12293 | 0.007754 | 0.039697 | 1062 | - && O06179.1 RecName: Full=Putative monooxygenase Rv1533 && PF03060:Nitronate monooxygenase                                                                                                                                                                             |
| Lachesis_group0__13_contigs__l.g678  | 2057.14  | 4492.705 | -1.12698 | 0.005443 | 0.030742 | 1725 | - && P15245.3 RecName: Full=Phenol 2-monooxygenase; AltName: Full=Phenol hydroxylase && PF07976:Phenol hydroxylase, C-terminal dimerisation domain PF01494:FAD binding domain                                                                                            |
| Lachesis_group0__13_contigs__l.g954  | 142.9647 | 313.2921 | -1.13207 | 0.009058 | 0.044086 | 750  | - && B8M9K0.1 RecName: Full=Hydrolase tropI; AltName: Full=Tropolone synthesis protein I && PF01738:Dienelactone hydrolase family                                                                                                                                        |
| Lachesis_group0__13_contigs__l.g2601 | 2188.881 | 4805.585 | -1.13457 | 0.010352 | 0.048406 | 1920 | - && Q9UTJ7.1 RecName: Full=Probable succinate dehydrogenase [ubiquinone] flavoprotein subunit, mitochondrial; AltName: Full=Flavoprotein subunit of complex II; Short=FP; Flags: Precursor && PF00890:FAD binding domain PF02910:Fumarate reductase flavoprotein C-term |
| Lachesis_group0__13_contigs__l.g4251 | 4026.553 | 8847.143 | -1.13565 | 0.007699 | 0.039529 | 2322 | - && - && PF10497:Zinc-finger domain of monoamine-oxidase A repressor R1                                                                                                                                                                                                 |
| Lachesis_group0__13_contigs__l.g2242 | 834.0684 | 1837.064 | -1.13934 | 0.004904 | 0.028534 | 4188 | - && O80327.1 RecName: Full=Thaumatococcus-like protein 1; Flags: Precursor && PF00314:Thaumatococcus family PF08386:TAP-like protein PF00561:alpha/beta hydrolase fold                                                                                                  |
| Lachesis_group0__13_contigs__l.g5700 | 105.7635 | 234.0366 | -1.1454  | 0.009454 | 0.045433 | 906  | - && Q0IHF9.2 RecName: Full=Store-operated calcium entry-associated regulatory factor; Short=SARAF; Short=SOCE-associated regulatory factor; AltName: Full=Transmembrane protein 66;                                                                                     |

|                                      |          |          |          |          |          |       |                                                                                                                                                                                                                                                    |
|--------------------------------------|----------|----------|----------|----------|----------|-------|----------------------------------------------------------------------------------------------------------------------------------------------------------------------------------------------------------------------------------------------------|
|                                      |          |          |          |          |          |       | Flags: Precursor && PF06682:SOCE-associated regulatory factor of calcium homoeostasis                                                                                                                                                              |
| Lachesis_group0__13_contigs__l.g6553 | 417.6558 | 929.8012 | -1.15494 | 0.006111 | 0.033324 | 10668 | - && P38811.1 RecName: Full=Transcription-associated protein 1; AltName: Full=p400 kDa component of SAGA && PF02259:FAT domain PF00454:Phosphatidylinositol 3- and 4-kinase                                                                        |
| Lachesis_group0__13_contigs__l.g2842 | 1672.627 | 3736.902 | -1.1598  | 0.008065 | 0.040843 | 1167  | - && Q9Y7N4.1 RecName: Full=D-amino-acid oxidase; Short=DAAO; Short=DAMOX; Short=DAO && PF01266:FAD dependent oxidoreductase                                                                                                                       |
| Lachesis_group0__13_contigs__l.g8786 | 469.6773 | 1051.332 | -1.16235 | 0.009851 | 0.046825 | 1053  | - && O42909.1 RecName: Full=Zinc-type alcohol dehydrogenase-like protein C16A3.02c && PF13602:Zinc-binding dehydrogenase                                                                                                                           |
| Lachesis_group0__13_contigs__l.g7505 | 265.2037 | 599.4959 | -1.17711 | 0.005061 | 0.02915  | 831   | - && - && PF00651:BTB/POZ domain                                                                                                                                                                                                                   |
| Lachesis_group0__13_contigs__l.g1641 | 58498.23 | 132501.1 | -1.17954 | 0.003525 | 0.022533 | 1311  | - && Q01982.1 RecName: Full=Glyceraldehyde-3-phosphate dehydrogenase; Short=GAPDH && PF02800:Glyceraldehyde 3-phosphate dehydrogenase, C-terminal domain PF00044:Glyceraldehyde 3-phosphate dehydrogenase, NAD binding domain                      |
| Lachesis_group0__13_contigs__l.g6803 | 134.7169 | 306.4316 | -1.18621 | 0.00641  | 0.034442 | 933   | - && Q9JLZ3.1 RecName: Full=Methylglutaconyl-CoA hydratase, mitochondrial; AltName: Full=AU-specific RNA-binding enoyl-CoA hydratase; Short=AU-binding enoyl-CoA hydratase; Short=muAUH; Flags: Precursor && PF00378:Enoyl-CoA hydratase/isomerase |

|                                       |          |          |          |          |          |      |                                                                                                                                                                                                                                                                                                                |
|---------------------------------------|----------|----------|----------|----------|----------|------|----------------------------------------------------------------------------------------------------------------------------------------------------------------------------------------------------------------------------------------------------------------------------------------------------------------|
| Lachesis_group0__13_contigs__l.g6734  | 3108.621 | 7083.352 | -1.18814 | 0.005226 | 0.029829 | 1275 | - && O59735.2 RecName: Full=Sphingosine N-acyltransferase lac1; AltName: Full=Meiotically up-regulated gene 83 protein && PF03798:TLC domain PF08390:TRAM1-like protein                                                                                                                                        |
| Lachesis_group0__13_contigs__l.g3650  | 131.9081 | 301.0579 | -1.19116 | 0.006486 | 0.034697 | 1347 | - && A2QBQ3.1 RecName: Full=Probable endo-1,3(4)-beta-glucanase An02g00850; AltName: Full=Mixed-linked glucanase An02g00850; Flags: Precursor && PF00652:Ricin-type beta-trefoil lectin domain                                                                                                                 |
| Lachesis_group0__13_contigs__l.g1600  | 407.6898 | 934.4788 | -1.19718 | 0.005432 | 0.030694 | 1395 | - && Q9P7L5.1 RecName: Full=Ornithine aminotransferase car2; AltName: Full=Ornithine--oxo-acid aminotransferase && PF00202:Aminotransferase class-III                                                                                                                                                          |
| Lachesis_group0__13_contigs__l.g10317 | 265.3583 | 610.9545 | -1.20384 | 0.006243 | 0.033862 | 2376 | - && O94556.2 RecName: Full=Anaphase-promoting complex subunit 8; AltName: Full=20S cyclosome/APC complex protein apc8; AltName: Full=Cell untimely torn protein 23 && PF04049:Anaphase promoting complex subunit 8 / Cdc23 PF13414:TPR repeat                                                                 |
| Lachesis_group0__13_contigs__l.g10550 | 211.4196 | 487.2438 | -1.205   | 0.005796 | 0.03203  | 2910 | - && P29064.1 RecName: Full=Alpha-glucosidase; AltName: Full=Maltase; Contains: RecName: Full=Alpha-glucosidase subunit 1; Contains: RecName: Full=Alpha-glucosidase subunit 2; Flags: Precursor && PF16863:N-terminal barrel of NtMGAM and CtMGAM, maltase-glucoamylase PF01055:Glycosyl hydrolases family 31 |

|                                       |          |          |          |          |          |      |                                                                                                                                                                                                                                                                                                                                                  |
|---------------------------------------|----------|----------|----------|----------|----------|------|--------------------------------------------------------------------------------------------------------------------------------------------------------------------------------------------------------------------------------------------------------------------------------------------------------------------------------------------------|
| Lachesis_group0__13_contigs__l.g6911  | 164.4791 | 380.4918 | -1.21085 | 0.010593 | 0.04922  | 246  | - && - && PF06522:NADH-ubiquinone reductase complex 1 MLRQ subunit                                                                                                                                                                                                                                                                               |
| Lachesis_group0__13_contigs__l.g7742  | 1040.985 | 2424.548 | -1.21999 | 0.009744 | 0.046456 | 2382 | - && Q96AX1.1 RecName: Full=Vacuolar protein sorting-associated protein 33A; Short=hVPS33A && PF00995:Sec1 family                                                                                                                                                                                                                                |
| Lachesis_group0__13_contigs__l.g11052 | 11191.36 | 26117.57 | -1.22265 | 0.006065 | 0.033142 | 1653 | - && A0A0B5EMG9.1 RecName: Full=Efflux pump FUBT; AltName: Full=Fusaric acid biosynthesis protein T; AltName: Full=Fusaric acid transporter && PF07690:Major Facilitator Superfamily                                                                                                                                                             |
| Lachesis_group0__13_contigs__l.g8157  | 3175.926 | 7415.227 | -1.22331 | 0.003725 | 0.023372 | 3306 | - && - && PF03370:Carbohydrate/starch-binding module (family 21)                                                                                                                                                                                                                                                                                 |
| Lachesis_group0__13_contigs__l.g11147 | 2894.821 | 6765.66  | -1.22472 | 0.003272 | 0.021353 | 1140 | - && Q56WD9.2 RecName: Full=3-ketoacyl-CoA thiolase 2, peroxisomal; AltName: Full=Acetyl-CoA acyltransferase 2; AltName: Full=Beta-ketothiolase 2; AltName: Full=Peroxisomal 3-oxoacyl-CoA thiolase 2; AltName: Full=Peroxisome defective protein 1; Flags: Precursor && PF02803:Thiolase, C-terminal domain PF00108:Thiolase, N-terminal domain |
| Lachesis_group0__13_contigs__l.g1697  | 3740.456 | 8825.505 | -1.23845 | 0.002167 | 0.015953 | 2661 | - && Q7ZUW2.1 RecName: Full=Hypoxia up-regulated protein 1; Flags: Precursor && PF00012:Hsp70 protein                                                                                                                                                                                                                                            |
| Lachesis_group0__13_contigs__l.g4651  | 2286.384 | 5408.565 | -1.24225 | 0.003539 | 0.022582 | 3114 | - && P40317.2 RecName: Full=Protein SOK1 && PF05794:T-complex protein 11                                                                                                                                                                                                                                                                         |
| Lachesis_group0__13_contigs__l.g6356  | 3170.642 | 7506.778 | -1.24345 | 0.00388  | 0.024048 | 2613 | - && Q17RB8.2 RecName: Full=LON peptidase N-terminal domain and RING finger protein 1; AltName: Full=RING finger protein 191 &&                                                                                                                                                                                                                  |

|                                      |          |          |          |          |          |      |                                                                                                                                                                                                                                                                    |
|--------------------------------------|----------|----------|----------|----------|----------|------|--------------------------------------------------------------------------------------------------------------------------------------------------------------------------------------------------------------------------------------------------------------------|
|                                      |          |          |          |          |          |      | PF02190:ATP-dependent protease La (LON) substrate-binding domain                                                                                                                                                                                                   |
| Lachesis_group0__13_contigs__l.g2738 | 851.7496 | 2018.94  | -1.24513 | 0.009221 | 0.044634 | 1974 | - && - && PF00443:Ubiquitin carboxyl-terminal hydrolase                                                                                                                                                                                                            |
| Lachesis_group0__13_contigs__l.g8784 | 158.8234 | 376.4083 | -1.24584 | 0.00688  | 0.036309 | 4407 | - && - && PF05729:NACHT domain                                                                                                                                                                                                                                     |
| Lachesis_group0__13_contigs__l.g6607 | 4255.424 | 10093.66 | -1.24609 | 0.008344 | 0.041801 | 657  | - && O13737.2 RecName: Full=Uncharacterized endoplasmic reticulum membrane protein C16E8.02 && PF06127:Protein of unknown function (DUF962)                                                                                                                        |
| Lachesis_group0__13_contigs__l.g1113 | 2019.863 | 4810.68  | -1.25199 | 0.010155 | 0.047729 | 1857 | - && Q2H XK9.2 RecName: Full=Respiratory burst oxidase homolog protein D; AltName: Full=NADPH oxidase RBOHD; AltName: Full=StrBOHD && PF08030:Ferric reductase NAD binding domain PF01794:Ferric reductase like transmembrane component PF08022:FAD-binding domain |
| Lachesis_group0__13_contigs__l.g9021 | 101.7582 | 243.2012 | -1.2565  | 0.009545 | 0.045626 | 879  | - && Q5F4C0.1 RecName: Full=Voltage-gated hydrogen channel 1; AltName: Full=Hydrogen voltage-gated channel 1; Short=HV1 && -                                                                                                                                       |
| Lachesis_group0__13_contigs__l.g6534 | 4141.554 | 9897.471 | -1.2569  | 0.001041 | 0.009549 | 1761 | - && P26585.1 RecName: Full=HMG1/2-like protein; AltName: Full=Protein SB11 && PF09011:HMG-box domain PF00505:HMG (high mobility group) box                                                                                                                        |
| Lachesis_group0__13_contigs__l.g3391 | 140.1299 | 335.8862 | -1.26177 | 0.005635 | 0.031467 | 765  | - && - && PF11807:Domain of unknown function (DUF3328)                                                                                                                                                                                                             |
| Lachesis_group0__13_contigs__l.g4610 | 768.9759 | 1855.875 | -1.27107 | 0.002867 | 0.019448 | 918  | - && P43069.1 RecName: Full=Cell division control protein 25 && PF00617:RasGEF domain                                                                                                                                                                              |

|                                       |          |          |          |          |          |      |                                                                                                                                                                                                                                                      |
|---------------------------------------|----------|----------|----------|----------|----------|------|------------------------------------------------------------------------------------------------------------------------------------------------------------------------------------------------------------------------------------------------------|
| Lachesis_group0__13_contigs__l.g11286 | 285.0414 | 688.4189 | -1.27255 | 0.004524 | 0.026852 | 1224 | - && Q59ZX3.1 RecName: Full=Repressed by EFG1 protein 1; AltName: Full=PRY family cell wall protein 2; Flags: Precursor && PF00188:Cysteine-rich secretory protein family                                                                            |
| Lachesis_group0__13_contigs__l.g9100  | 69.68355 | 168.8631 | -1.27579 | 0.008895 | 0.043683 | 687  | - && Q00719.1 RecName: Full=O-methyltransferase MdmC && PF01596:O-methyltransferase                                                                                                                                                                  |
| Lachesis_group0__13_contigs__l.g8150  | 294.2243 | 712.9446 | -1.27703 | 0.003137 | 0.020661 | 1389 | - && Q96V64.1 RecName: Full=Glucan 1,3-beta-glucosidase; AltName: Full=Exo-1,3-beta-glucanase; Flags: Precursor && PF00150:Cellulase (glycosyl hydrolase family 5)                                                                                   |
| Lachesis_group0__13_contigs__l.g2117  | 123.1471 | 298.3861 | -1.27813 | 0.007287 | 0.037981 | 1416 | - && J9MJK9.1 RecName: Full=Transaldolase; Short=FoTal && PF00923:Transaldolase                                                                                                                                                                      |
| Lachesis_group0__13_contigs__l.g8960  | 2357.926 | 5720.471 | -1.27868 | 0.004075 | 0.025013 | 1308 | - && - && PF10021:Uncharacterized protein conserved in bacteria (DUF2263)                                                                                                                                                                            |
| Lachesis_group0__13_contigs__l.g4977  | 1191.175 | 2893.305 | -1.28049 | 0.007409 | 0.038309 | 1548 | - && Q5A220.2 RecName: Full=Repressor of filamentous growth 1 && PF00505:HMG (high mobility group) box                                                                                                                                               |
| Lachesis_group0__13_contigs__l.g7156  | 121605   | 295580.7 | -1.28135 | 0.001064 | 0.009701 | 3507 | - && Q9P7Q4.1 RecName: Full=Vesicular-fusion protein sec18 && PF02933:Cell division protein 48 (CDC48), domain 2 PF00004:ATPase family associated with various cellular activities (AAA)                                                             |
| Lachesis_group0__13_contigs__l.g1942  | 441.422  | 1073.422 | -1.28198 | 0.003579 | 0.022774 | 1155 | - && - && PF14249:Tocopherol cyclase                                                                                                                                                                                                                 |
| Lachesis_group0__13_contigs__l.g8852  | 1147.712 | 2792.55  | -1.28293 | 0.001299 | 0.011073 | 1977 | - && Q8K194.1 RecName: Full=U4/U6.U5 small nuclear ribonucleoprotein 27 kDa protein; Short=U4/U6.U5 snRNP 27 kDa protein; Short=U4/U6.U5-27K; AltName: Full=U4/U6.U5 tri-snRNP-associated protein 3 && PF08648:Protein of unknown function (DUF1777) |

|                                       |          |          |          |          |          |      |                                                                                                                                                                                                                                                                                                                                                                                                                                                                                                                                       |
|---------------------------------------|----------|----------|----------|----------|----------|------|---------------------------------------------------------------------------------------------------------------------------------------------------------------------------------------------------------------------------------------------------------------------------------------------------------------------------------------------------------------------------------------------------------------------------------------------------------------------------------------------------------------------------------------|
| Lachesis_group0__13_contigs__l.g11231 | 337.5121 | 828.6786 | -1.29628 | 0.004968 | 0.028786 | 9282 | - && Q07878.1 RecName: Full=Vacuolar protein sorting-associated protein 13; AltName: Full=Suppression of the onset of impotence protein 1; AltName: Full=Vacuolar protein-targeting protein 2 && PF09333:Autophagy-related protein C terminal domain PF06650:SHR-binding domain of vacuolar-sorting associated protein 13 PF12624:N-terminal region of Chorein or VPS13 PF16910:Repeating coiled region of VPS13 PF16909:Vacuolar-sorting-associated 13 protein C-terminal PF16908:Vacuolar sorting-associated protein 13, N-terminal |
| Lachesis_group0__13_contigs__l.g6900  | 1398.04  | 3433.581 | -1.29633 | 0.000799 | 0.007856 | 1515 | - && Q92407.1 RecName: Full=Glucokinase; AltName: Full=Glucose kinase; Short=GLK && PF00349:Hexokinase PF03727:Hexokinase                                                                                                                                                                                                                                                                                                                                                                                                             |
| Lachesis_group0__13_contigs__l.g9387  | 290.0497 | 713.2543 | -1.29799 | 0.009649 | 0.046043 | 4206 | - && Q13423.3 RecName: Full=NAD(P) transhydrogenase, mitochondrial; AltName: Full=Nicotinamide nucleotide transhydrogenase; AltName: Full=Pyridine nucleotide transhydrogenase; Flags: Precursor && PF02233:NAD(P) transhydrogenase beta subunit PF00701:Dihydrodipicolinate synthetase family PF05222:Alanine dehydrogenase/PNT, N-terminal domain PF01262:Alanine dehydrogenase/PNT, C-terminal domain PF12769:4TM region of pyridine nucleotide transhydrogenase, mitoch                                                           |

|                                       |          |          |          |          |          |      |                                                                                                                                                                                                                                                                                    |
|---------------------------------------|----------|----------|----------|----------|----------|------|------------------------------------------------------------------------------------------------------------------------------------------------------------------------------------------------------------------------------------------------------------------------------------|
| Lachesis_group0__13_contigs__l.g4517  | 670.6601 | 1652.581 | -1.30128 | 0.008501 | 0.042391 | 1770 | - && P54857.1 RecName: Full=Lipase 2; AltName: Full=Triacylglycerol lipase 2 && -                                                                                                                                                                                                  |
| Lachesis_group0__13_contigs__l.g8291  | 21494.64 | 53456.38 | -1.31439 | 0.00066  | 0.006823 | 5076 | - && Q0DV32.2 RecName: Full=4-coumarate--CoA ligase-like 1 && PF00501:AMP-binding enzyme PF00441:Acyl-CoA dehydrogenase, C-terminal domain PF02353:Mycolic acid cyclopropane synthetase PF02770:Acyl-CoA dehydrogenase, middle domain PF13193:AMP-binding enzyme C-terminal domain |
| Lachesis_group0__13_contigs__l.g4990  | 1071.231 | 2665.32  | -1.31506 | 0.008597 | 0.042736 | 1596 | - && - && PF12937:F-box-like                                                                                                                                                                                                                                                       |
| Lachesis_group0__13_contigs__l.g6187  | 1640.43  | 4091.885 | -1.31877 | 0.010214 | 0.047898 | 2751 | - && - && PF00400:WD domain, G-beta repeat                                                                                                                                                                                                                                         |
| Lachesis_group0__13_contigs__l.g1157  | 89.80105 | 224.6208 | -1.32264 | 0.009325 | 0.044968 | 2130 | - && A8DZE7.1 RecName: Full=Short-chain dehydrogenase/reductase family 42E member 1 && PF01073:3-beta hydroxysteroid dehydrogenase/isomerase family                                                                                                                                |
| Lachesis_group0__13_contigs__l.g1698  | 67.9899  | 170.2299 | -1.32474 | 0.008395 | 0.041996 | 1695 | - && - && PF00651:BTB/POZ domain                                                                                                                                                                                                                                                   |
| Lachesis_group0__13_contigs__l.g11628 | 995.4142 | 2495.128 | -1.32584 | 0.003026 | 0.020143 | 4080 | - && Q9Y810.1 RecName: Full=Cytochrome oxidase assembly protein shy1; AltName: Full=SURF1-like protein && PF02104:SURF1 family                                                                                                                                                     |
| Lachesis_group0__13_contigs__l.g5096  | 140.1547 | 351.9784 | -1.32877 | 0.004319 | 0.026026 | 1293 | - && - && PF00339:Arrestin (or S-antigen), N-terminal domain                                                                                                                                                                                                                       |
| Lachesis_group0__13_contigs__l.g10953 | 373.1148 | 937.1542 | -1.32924 | 0.008832 | 0.043564 | 1617 | - && Q7KW39.1 RecName: Full=Probable methylmalonate-semialdehyde dehydrogenase [acylating], mitochondrial; Short=MMSDH; Short=Malonate-semialdehyde dehydrogenase [acylating]; Flags: Precursor && PF00171:Aldehyde dehydrogenase family                                           |



|                                       |          |          |          |          |          |      |                                                                                                                                                                                                                                                                                                                                                                                                                 |
|---------------------------------------|----------|----------|----------|----------|----------|------|-----------------------------------------------------------------------------------------------------------------------------------------------------------------------------------------------------------------------------------------------------------------------------------------------------------------------------------------------------------------------------------------------------------------|
| Lachesis_group0__13_contigs__l.g9938  | 8570.134 | 21556.4  | -1.33072 | 0.005271 | 0.030032 | 3204 | - && Q9Y8G7.1 RecName: Full=Bifunctional cytochrome P450/NADPH--P450 reductase; AltName: Full=Cytochrome P450foxy; AltName: Full=Fatty acid omega-hydroxylase; AltName: Full=P450foxy; Includes: RecName: Full=Cytochrome P450 505; Includes: RecName: Full=NADPH--cytochrome P450 reductase && PF00067:Cytochrome P450 PF00258:Flavodoxin PF00667:FAD binding domain PF00175:Oxidoreductase NAD-binding domain |
| Lachesis_group0__13_contigs__l.g11426 | 713.7168 | 1806.629 | -1.34005 | 0.002131 | 0.015779 | 927  | - && - && PF13622:Thioesterase-like superfamily                                                                                                                                                                                                                                                                                                                                                                 |
| Lachesis_group0__13_contigs__l.g10294 | 1934.113 | 4898.247 | -1.34064 | 0.002918 | 0.019635 | 699  | - && Q9UUM7.1 RecName: Full=Protein hob3; AltName: Full=Homolog of Bin3 && PF03114:BAR domain                                                                                                                                                                                                                                                                                                                   |
| Lachesis_group0__13_contigs__l.g10201 | 250.8697 | 635.7417 | -1.34212 | 0.002835 | 0.019301 | 633  | - && - && PF13883:Pyridoxamine 5'-phosphate oxidase                                                                                                                                                                                                                                                                                                                                                             |
| Lachesis_group0__13_contigs__l.g7791  | 5183.248 | 13158.39 | -1.34408 | 0.00572  | 0.031764 | 5385 | - && Q9P792.1 RecName: Full=ZZ-type zinc finger-containing protein P35G2.11c && PF16158:Ig-like domain from next to BRCA1 gene PF00569:Zinc finger, ZZ type                                                                                                                                                                                                                                                     |
| Lachesis_group0__13_contigs__l.g10191 | 43763.85 | 111293.4 | -1.34656 | 0.005353 | 0.030341 | 2163 | - && P87049.3 RecName: Full=G1/S-specific cyclin pas1 && -                                                                                                                                                                                                                                                                                                                                                      |
| Lachesis_group0__13_contigs__l.g10858 | 691.9108 | 1766.263 | -1.35208 | 0.010008 | 0.047261 | 1041 | - && - && PF01180:Dihydroorotate dehydrogenase                                                                                                                                                                                                                                                                                                                                                                  |
| Lachesis_group0__13_contigs__l.g6864  | 30162.72 | 77166.66 | -1.35522 | 0.002925 | 0.019647 | 543  | - && - && PF00397:WW domain                                                                                                                                                                                                                                                                                                                                                                                     |
| Lachesis_group0__13_contigs__l.g8441  | 294.1157 | 752.6999 | -1.35544 | 0.003716 | 0.023358 | 1602 | - && - && PF01699:Sodium/calcium exchanger protein                                                                                                                                                                                                                                                                                                                                                              |

|                                       |          |          |          |          |          |      |                                                                                                                                                                                                                        |
|---------------------------------------|----------|----------|----------|----------|----------|------|------------------------------------------------------------------------------------------------------------------------------------------------------------------------------------------------------------------------|
| Lachesis_group0__13_contigs__l.g9601  | 143.756  | 368.0468 | -1.35643 | 0.004458 | 0.026558 | 765  | - && O74758.1 RecName: Full=Uncharacterized protein C17D11.03c && -                                                                                                                                                    |
| Lachesis_group0__13_contigs__l.g8076  | 2502.706 | 6442.579 | -1.36419 | 0.002416 | 0.017292 | 1332 | - && P42894.1 RecName: Full=Enolase; AltName: Full=2-phospho-D-glycerate hydro-lyase; AltName: Full=2-phosphoglycerate dehydratase && PF00113:Enolase, C-terminal TIM barrel domain PF03952:Enolase, N-terminal domain |
| Lachesis_group0__13_contigs__l.g4151  | 347.0612 | 893.7447 | -1.36484 | 0.008702 | 0.043122 | 1299 | - && Q8NBN7.2 RecName: Full=Retinol dehydrogenase 13; AltName: Full=Short chain dehydrogenase/reductase family 7C member 3 && PF00106:short chain dehydrogenase PF02566:OsmC-like protein                              |
| Lachesis_group0__13_contigs__l.g4940  | 3640.226 | 9410.051 | -1.37019 | 0.003222 | 0.021127 | 1140 | - && Q06497.1 RecName: Full=Peroxisomal adenine nucleotide transporter 1 && PF00153:Mitochondrial carrier protein                                                                                                      |
| Lachesis_group0__13_contigs__l.g7712  | 178.6678 | 463.229  | -1.37499 | 0.001429 | 0.011791 | 852  | - && G4V4T7.1 RecName: Full=Enoyl-CoA hydratase && PF00378:Enoyl-CoA hydratase/isomerase                                                                                                                               |
| Lachesis_group0__13_contigs__l.g10883 | 112.5601 | 291.8914 | -1.37565 | 0.007761 | 0.039715 | 1593 | - && Q54PK9.1 RecName: Full=3-phosphoinositide-dependent protein kinase B; AltName: Full=Pdk-class protein kinase b && PF00069:Protein kinase domain                                                                   |
| Lachesis_group0__13_contigs__l.g6679  | 413.5621 | 1074.782 | -1.37811 | 0.001991 | 0.015048 | 1143 | - && - && PF03227:Gamma interferon inducible lysosomal thiol reductase (GILT) PF09774:Caffeine-induced death protein 2                                                                                                 |
| Lachesis_group0__13_contigs__l.g5756  | 617.7663 | 1606.011 | -1.37846 | 0.006273 | 0.033969 | 837  | - && - && PF00293:NUDIX domain                                                                                                                                                                                         |
| Lachesis_group0__13_contigs__l.g530   | 522.0167 | 1357.235 | -1.37882 | 0.002501 | 0.017661 | 1044 | - && Q9UT59.1 RecName: Full=Putative uncharacterized oxidoreductase C513.07 &&                                                                                                                                         |

|                                      |          |          |          |          |          |      |                                                                                                                                                                                                                                                                                                                                                                                |
|--------------------------------------|----------|----------|----------|----------|----------|------|--------------------------------------------------------------------------------------------------------------------------------------------------------------------------------------------------------------------------------------------------------------------------------------------------------------------------------------------------------------------------------|
|                                      |          |          |          |          |          |      | PF01370:NAD dependent epimerase/dehydratase family                                                                                                                                                                                                                                                                                                                             |
| Lachesis_group0__13_contigs__l.g6418 | 340.019  | 884.0811 | -1.37889 | 0.008721 | 0.043156 | 1641 | - && Q07982.2 RecName: Full=Glucose--fructose oxidoreductase; Short=GFOR; Flags: Precursor && PF02894:Oxidoreductase family, C-terminal alpha/beta domain PF01408:Oxidoreductase family, NAD-binding Rossmann fold                                                                                                                                                             |
| Lachesis_group0__13_contigs__l.g2048 | 8838.848 | 23017.42 | -1.38081 | 0.003508 | 0.022484 | 1947 | - && P32949.1 RecName: Full=Lipase 5; Flags: Precursor && PF00135:Carboxylesterase family                                                                                                                                                                                                                                                                                      |
| Lachesis_group0__13_contigs__l.g1187 | 1576.706 | 4122.739 | -1.38674 | 0.001091 | 0.009858 | 2616 | - && P06738.4 RecName: Full=Glycogen phosphorylase && PF00343:Carbohydrate phosphorylase                                                                                                                                                                                                                                                                                       |
| Lachesis_group0__13_contigs__l.g458  | 242.6757 | 635.5279 | -1.38903 | 0.002665 | 0.018455 | 6915 | - && P9WQE7.1 RecName: Full=Phthiocerol synthesis polyketide synthase type I PpsA; AltName: Full=Beta-ketoacyl-acyl-carrier-protein synthase I && PF00698:Acyl transferase domain PF02801:Beta-ketoacyl synthase, C-terminal domain PF08659:KR domain PF07993:Male sterility protein PF14765:Polyketide synthase dehydratase PF00109:Beta-ketoacyl synthase, N-terminal domain |
| Lachesis_group0__13_contigs__l.g6053 | 1731.154 | 4541.656 | -1.39143 | 0.000826 | 0.008073 | 660  | - && P40581.1 RecName: Full=Peroxiredoxin HYR1; AltName: Full=Glutathione peroxidase 3; AltName: Full=Hydrogen peroxide resistance protein 1; AltName: Full=Oxidant receptor peroxidase 1; AltName: Full=Phospholipid hydroperoxide glutathione peroxidase 3;                                                                                                                  |

|                                      |          |          |          |          |          |      |                                                                                                                                                         |
|--------------------------------------|----------|----------|----------|----------|----------|------|---------------------------------------------------------------------------------------------------------------------------------------------------------|
|                                      |          |          |          |          |          |      | Short=PHGPx3 && PF00255:Glutathione peroxidase                                                                                                          |
| Lachesis_group0__13_contigs__l.g8451 | 123.0174 | 323.2958 | -1.395   | 0.00433  | 0.026067 | 4047 | - && - && PF13191:AAA ATPase domain                                                                                                                     |
| Lachesis_group0__13_contigs__l.g8399 | 2569.974 | 6771.641 | -1.39783 | 0.00269  | 0.018568 | 3954 | - && Q6LPK6.1 RecName: Full=Lipid A export ATP-binding/permease protein MsbA && -                                                                       |
| Lachesis_group0__13_contigs__l.g5810 | 710.4505 | 1871.986 | -1.398   | 0.00893  | 0.043802 | 3000 | - && Q9HDZ2.2 RecName: Full=Protein cwh43 && PF10277:Frag1/DRAM/Sfk1 family                                                                             |
| Lachesis_group0__13_contigs__l.g7258 | 4717.184 | 12441.49 | -1.39919 | 0.000406 | 0.004813 | 3924 | - && P53721.1 RecName: Full=Respiratory supercomplex factor 2, mitochondrial; AltName: Full=Altered inheritance of mitochondria protein 38 && -         |
| Lachesis_group0__13_contigs__l.g5018 | 107.5631 | 284.0091 | -1.40093 | 0.002185 | 0.016047 | 1641 | - && Q5A744.1 RecName: Full=Protein SDS23 && -                                                                                                          |
| Lachesis_group0__13_contigs__l.g959  | 402.615  | 1063.403 | -1.40182 | 0.004685 | 0.027574 | 585  | - && - && PF05180:DNL zinc finger                                                                                                                       |
| Lachesis_group0__13_contigs__l.g5110 | 6459.193 | 17080.51 | -1.40294 | 0.001326 | 0.011221 | 744  | - && - && PF13430:Domain of unknown function (DUF4112)                                                                                                  |
| Lachesis_group0__13_contigs__l.g6108 | 129.5828 | 343.7123 | -1.40714 | 0.001132 | 0.010067 | 2496 | - && P55487.1 RecName: Full=Uncharacterized monooxygenase y4iD && PF13738:Pyridine nucleotide-disulphide oxidoreductase                                 |
| Lachesis_group0__13_contigs__l.g7796 | 2224.284 | 5903.372 | -1.40828 | 0.002521 | 0.01774  | 1215 | - && Q58EJ9.1 RecName: Full=Mitochondrial amidoxime-reducing component 1; Short=mARC1 && PF03476:MOSC N-terminal beta barrel domain PF03473:MOSC domain |
| Lachesis_group0__13_contigs__l.g4889 | 104.3974 | 277.8331 | -1.41386 | 0.009911 | 0.046904 | 3765 | - && P34211.3 RecName: Full=Putative hydrolase YuaR; Flags: Precursor && PF00561:alpha/beta hydrolase fold PF08386:TAP-like protein                     |
| Lachesis_group0__13_contigs__l.g7762 | 143.9002 | 384.1034 | -1.41662 | 0.007862 | 0.040065 | 1095 | - && Q5AUY5.1 RecName: Full=Zinc-binding alcohol dehydrogenase domain-containing protein cipB; AltName: Full=Concanamycin-induced                       |

|                                       |          |          |          |          |          |      |                                                                                                                                                                                                                                                                                                      |
|---------------------------------------|----------|----------|----------|----------|----------|------|------------------------------------------------------------------------------------------------------------------------------------------------------------------------------------------------------------------------------------------------------------------------------------------------------|
|                                       |          |          |          |          |          |      | protein B && PF08240:Alcohol dehydrogenase GroES-like domain PF00107:Zinc-binding dehydrogenase                                                                                                                                                                                                      |
| Lachesis_group0__13_contigs__l.g4574  | 638.7761 | 1710.303 | -1.42126 | 0.006051 | 0.033109 | 2949 | - && Q5E9V4.1 RecName: Full=Protein RRNAD1 && PF13679:Methyltransferase domain                                                                                                                                                                                                                       |
| Lachesis_group0__13_contigs__l.g8571  | 43.77659 | 117.1315 | -1.42221 | 0.008999 | 0.043933 | 1551 | - && P0CO49.1 RecName: Full=Kynurenine 3-monooxygenase; AltName: Full=Biosynthesis of nicotinic acid protein 4; AltName: Full=Kynurenine 3-hydroxylase && PF01494:FAD binding domain                                                                                                                 |
| Lachesis_group0__13_contigs__l.g11060 | 332.6549 | 892.4689 | -1.4241  | 0.004373 | 0.026243 | 1650 | - && P49374.1 RecName: Full=High-affinity glucose transporter && PF00083:Sugar (and other) transporter                                                                                                                                                                                               |
| Lachesis_group0__13_contigs__l.g2033  | 160.7094 | 431.645  | -1.4266  | 0.00556  | 0.031189 | 5091 | - && Q9P7V2.1 RecName: Full=ATP-binding cassette transporter abc4; Short=ABC transporter abc4; AltName: Full=ATP-energized glutathione S-conjugate pump abc4; AltName: Full=Glutathione S-conjugate-transporting ATPase abc4 && PF00005:ABC transporter PF00664:ABC transporter transmembrane region |
| Lachesis_group0__13_contigs__l.g11011 | 3782.841 | 10196.55 | -1.43055 | 0.006437 | 0.034551 | 1710 | - && - && PF13805:Eisosome component PIL1                                                                                                                                                                                                                                                            |
| Lachesis_group0__13_contigs__l.g2083  | 88.88895 | 239.8967 | -1.4324  | 0.010217 | 0.047898 | 1254 | - && - && PF00010:Helix-loop-helix DNA-binding domain                                                                                                                                                                                                                                                |
| Lachesis_group0__13_contigs__l.g7442  | 194.0115 | 524.2408 | -1.4353  | 0.005049 | 0.029131 | 1104 | - && Q148L6.1 RecName: Full=Trans-1,2-dihydrobenzene-1,2-diol dehydrogenase; AltName: Full=D-xylose 1-dehydrogenase; AltName: Full=D-xylose-NADP dehydrogenase; AltName: Full=Dimeric dihydrodiol                                                                                                    |

|                                       |          |          |          |          |          |      |                                                                                                                                                                                                                                          |
|---------------------------------------|----------|----------|----------|----------|----------|------|------------------------------------------------------------------------------------------------------------------------------------------------------------------------------------------------------------------------------------------|
|                                       |          |          |          |          |          |      | dehydrogenase && PF01408:Oxidoreductase family, NAD-binding Rossmann fold                                                                                                                                                                |
| Lachesis_group0__13_contigs__l.g638   | 707.142  | 1922.321 | -1.44295 | 0.002093 | 0.015588 | 1788 | - && - && PF15786:PET assembly of cytochrome c oxidase, mitochondrial                                                                                                                                                                    |
| Lachesis_group0__13_contigs__l.g9399  | 679.7225 | 1857.037 | -1.45013 | 0.00213  | 0.015779 | 1464 | - && Q9RC92.1 RecName: Full=Unsaturated glucuronyl hydrolase; Short=UGL; AltName: Full=Glycosaminoglycan hydrolase; AltName: Full=Glycuronidase; AltName: Full=Unsaturated uronic acid hydrolase && PF07470:Glycosyl Hydrolase Family 88 |
| Lachesis_group0__13_contigs__l.g6761  | 200.7278 | 548.8104 | -1.45066 | 0.001119 | 0.010032 | 1542 | - && O43000.2 RecName: Full=Pantothenate transporter liz1 && PF07690:Major Facilitator Superfamily                                                                                                                                       |
| Lachesis_group0__13_contigs__l.g7783  | 1098.955 | 3005.704 | -1.45164 | 0.001331 | 0.011227 | 1992 | - && O96904.1 RecName: Full=Drainin; AltName: Full=TBC1 domain family member 12 homolog && PF00566:Rab-GTPase-TBC domain                                                                                                                 |
| Lachesis_group0__13_contigs__l.g8262  | 234.9166 | 642.7735 | -1.45244 | 0.001053 | 0.009627 | 5529 | - && - && PF13191:AAA ATPase domain                                                                                                                                                                                                      |
| Lachesis_group0__13_contigs__l.g10472 | 2150.091 | 5884.373 | -1.45255 | 0.00024  | 0.003294 | 2484 | - && A3KMOV8.1 RecName: Full=Ran-binding protein 10; Short=RanBP10 && PF00622:SPRY domain PF10607:CTLH/CRA C-terminal to LisH motif domain                                                                                               |
| Lachesis_group0__13_contigs__l.g6029  | 5014.38  | 13737.45 | -1.454   | 0.002056 | 0.015422 | 2454 | - && O42938.1 RecName: Full=ATP-dependent 6-phosphofructokinase; Short=ATP-PFK; Short=Phosphofructokinase; AltName: Full=Phosphohexokinase && PF00365:Phosphofructokinase                                                                |
| Lachesis_group0__13_contigs__l.g5303  | 147.057  | 403.05   | -1.45472 | 0.001206 | 0.010484 | 2649 | - && Q01373.1 RecName: Full=Peroxisomal hydratase-dehydrogenase-epimerase; Short=HDE;                                                                                                                                                    |

|                                       |          |          |          |          |          |      |                                                                                                                                                                                                                                            |
|---------------------------------------|----------|----------|----------|----------|----------|------|--------------------------------------------------------------------------------------------------------------------------------------------------------------------------------------------------------------------------------------------|
|                                       |          |          |          |          |          |      | AltName: Full=Multifunctional beta-oxidation protein; Short=MFP; Includes: RecName: Full=2-enoyl-CoA hydratase; Includes: RecName: Full=(3R)-3-hydroxyacyl-CoA dehydrogenase && PF00106:short chain dehydrogenase PF01575:MaoC like domain |
| Lachesis_group0__13_contigs__l.g2075  | 339.9873 | 933.2751 | -1.4569  | 0.007239 | 0.037747 | 921  | - && Q03219.1 RecName: Full=Uncharacterized protein YMR178W && PF00994:Probable molybdopterin binding domain                                                                                                                               |
| Lachesis_group0__13_contigs__l.g9922  | 727.6441 | 1997.339 | -1.45692 | 0.004684 | 0.027574 | 1575 | - && - && PF01753:MYND finger                                                                                                                                                                                                              |
| Lachesis_group0__13_contigs__l.g9692  | 338.8713 | 930.4167 | -1.4571  | 0.002794 | 0.019073 | 435  | - && - && PF00067:Cytochrome P450                                                                                                                                                                                                          |
| Lachesis_group0__13_contigs__l.g2892  | 656.799  | 1804.584 | -1.45794 | 0.003699 | 0.023293 | 1668 | - && P0CU32.1 RecName: Full=FAD-linked oxidoreductase CHGG_01242-2; AltName: Full=Chaetoglobosin biosynthesis protein CHGG_01242-2 && PF01565:FAD binding domain                                                                           |
| Lachesis_group0__13_contigs__l.g7429  | 11106.09 | 30716.83 | -1.46768 | 0.003364 | 0.021772 | 1053 | - && Q5UP73.1 RecName: Full=Putative band 7 family protein R614 && PF01145:SPFH domain / Band 7 family                                                                                                                                     |
| Lachesis_group0__13_contigs__l.g11363 | 1170.449 | 3249.138 | -1.47309 | 0.005181 | 0.029691 | 2277 | - && Q9H4L5.1 RecName: Full=Oxysterol-binding protein-related protein 3; Short=ORP-3; Short=OSBP-related protein 3 && PF15409:Pleckstrin homology domain PF01237:Oxysterol-binding protein                                                 |
| Lachesis_group0__13_contigs__l.g3515  | 144.5009 | 401.1618 | -1.4733  | 0.008867 | 0.043642 | 1536 | - && Q6UEF1.1 RecName: Full=Oxidoreductase AflY; AltName: Full=Aflatoxin biosynthesis protein Y && PF14027:Protein of unknown function (DUF4243)                                                                                           |

|                                       |          |          |          |          |          |      |                                                                                                                                                                                                               |
|---------------------------------------|----------|----------|----------|----------|----------|------|---------------------------------------------------------------------------------------------------------------------------------------------------------------------------------------------------------------|
| Lachesis_group0__13_contigs__l.g5773  | 93.88881 | 260.6784 | -1.47461 | 0.010391 | 0.048468 | 2262 | - && Q7Z9M8.1 RecName: Full=Xyloglucanase; Short=XG; AltName: Full=Cel74a; Flags: Precursor && -                                                                                                              |
| Lachesis_group0__13_contigs__l.g360   | 79.04213 | 220.7297 | -1.48185 | 0.004741 | 0.027853 | 2511 | - && Q5B6Q3.1 RecName: Full=Glucan endo-1,6-beta-glucosidase B; AltName: Full=Beta-1,6-glucanase B; AltName: Full=Endo-1,6-beta-D-glucanase B; AltName: Full=Endo-1,6-beta-glucanase B; Flags: Precursor && - |
| Lachesis_group0__13_contigs__l.g5886  | 333.4815 | 932.0632 | -1.483   | 0.004029 | 0.024801 | 999  | - && Q6F4M7.1 RecName: Full=Hydroxyquinol 1,2-dioxygenase && PF00775:Dioxygenase PF04444:Catechol dioxygenase N terminus                                                                                      |
| Lachesis_group0__13_contigs__l.g8755  | 173.9798 | 488.9122 | -1.49127 | 0.000849 | 0.008258 | 507  | - && Q9Y6Z9.1 RecName: Full=Sorbose reductase sou1; AltName: Full=Sorbitol utilization protein sou1 && -                                                                                                      |
| Lachesis_group0__13_contigs__l.g9104  | 68.14695 | 191.5716 | -1.49237 | 0.005495 | 0.030953 | 2031 | - && - && PF12862:Anaphase-promoting complex subunit 5                                                                                                                                                        |
| Lachesis_group0__13_contigs__l.g273   | 4022.967 | 11330.75 | -1.49392 | 0.000128 | 0.002148 | 1488 | - && - && PF05057:Putative serine esterase (DUF676)                                                                                                                                                           |
| Lachesis_group0__13_contigs__l.g2571  | 194.814  | 549.3854 | -1.49594 | 0.000745 | 0.007461 | 4692 | - && - && PF00400:WD domain, G-beta repeat                                                                                                                                                                    |
| Lachesis_group0__13_contigs__l.g5310  | 218.0529 | 615.7051 | -1.49804 | 0.003655 | 0.023131 | 1560 | - && P30284.1 RecName: Full=G2/mitotic-specific cyclin-B && PF00134:Cyclin, N-terminal domain PF02984:Cyclin, C-terminal domain                                                                               |
| Lachesis_group0__13_contigs__l.g5795  | 67.07184 | 189.1421 | -1.49868 | 0.005887 | 0.032456 | 954  | - && Q54GH4.1 RecName: Full=Inositol oxygenase; AltName: Full=Myo-inositol oxygenase; Short=MI oxygenase && PF05153:Myo-inositol oxygenase                                                                    |
| Lachesis_group0__13_contigs__l.g11150 | 1929.683 | 5459.876 | -1.50054 | 0.002768 | 0.018944 | 876  | - && - && PF00622:SPRY domain                                                                                                                                                                                 |



|                                       |          |          |          |          |          |      |                                                                                                                                                                                                                                                                                                                                                                                                                    |
|---------------------------------------|----------|----------|----------|----------|----------|------|--------------------------------------------------------------------------------------------------------------------------------------------------------------------------------------------------------------------------------------------------------------------------------------------------------------------------------------------------------------------------------------------------------------------|
| Lachesis_group0__13_contigs__l.g8622  | 2340.618 | 6630.038 | -1.50216 | 0.005571 | 0.031189 | 858  | - && - && PF11274:Protein of unknown function (DUF3074)                                                                                                                                                                                                                                                                                                                                                            |
| Lachesis_group0__13_contigs__l.g2720  | 4986.176 | 14127.01 | -1.50247 | 0.000353 | 0.004332 | 1416 | - && O02373.1 RecName: Full=UDP-glucose 6-dehydrogenase; Short=UDP-Glc dehydrogenase; Short=UDP-GlcDH; Short=UDPGDH; AltName: Full=Protein sugarless; AltName: Full=Protein suppenkasper && PF03721:UDP-glucose/GDP-mannose dehydrogenase family, NAD binding domain PF00984:UDP-glucose/GDP-mannose dehydrogenase family, central domain PF03720:UDP-glucose/GDP-mannose dehydrogenase family, UDP binding domain |
| Lachesis_group0__13_contigs__l.g11575 | 700.2748 | 1989.945 | -1.50668 | 0.002608 | 0.018142 | 1557 | - && - && PF09994:Uncharacterized alpha/beta hydrolase domain (DUF2235)                                                                                                                                                                                                                                                                                                                                            |
| Lachesis_group0__13_contigs__l.g5020  | 938.7133 | 2667.652 | -1.50705 | 0.002433 | 0.017335 | 1728 | - && Q47944.1 RecName: Full=L-sorbose 1-dehydrogenase; Short=SDH && PF00732:GMC oxidoreductase PF05199:GMC oxidoreductase                                                                                                                                                                                                                                                                                          |
| Lachesis_group0__13_contigs__l.g9078  | 1086.94  | 3090.957 | -1.50799 | 0.001624 | 0.012881 | 705  | - && - && PF06687:SUR7/PalI family                                                                                                                                                                                                                                                                                                                                                                                 |
| Lachesis_group0__13_contigs__l.g571   | 136.9108 | 389.2017 | -1.50831 | 0.001145 | 0.010132 | 1833 | - && O13902.1 RecName: Full=Dihydroxyacetone kinase 1; Short=DHA kinase 1; AltName: Full=Glycerone kinase 1; AltName: Full=Triokinase 1; AltName: Full=Triose kinase 1 && PF02734:DAK2 domain PF02733:Dak1 domain                                                                                                                                                                                                  |
| Lachesis_group0__13_contigs__l.g2585  | 88.01787 | 252.099  | -1.52036 | 0.010577 | 0.049186 | 1092 | - && Q7LL04.2 RecName: Full=UPF0676 protein C1494.01 && PF03171:2OG-Fe(II) oxygenase superfamily PF14226:non-haem dioxygenase in morphine synthesis N-terminal                                                                                                                                                                                                                                                     |

|                                       |          |          |          |          |          |      |                                                                                                                                                                                                                                     |
|---------------------------------------|----------|----------|----------|----------|----------|------|-------------------------------------------------------------------------------------------------------------------------------------------------------------------------------------------------------------------------------------|
| Lachesis_group0__13_contigs__l.g109   | 116.5478 | 335.3026 | -1.52355 | 0.000613 | 0.006434 | 1419 | - && Q12436.1 RecName: Full=Zinc-regulated transporter 2; AltName: Full=Low-affinity zinc transport protein ZRT2 && PF02535:ZIP Zinc transporter                                                                                    |
| Lachesis_group0__13_contigs__l.g4086  | 196.492  | 565.4383 | -1.52487 | 0.008389 | 0.041988 | 1626 | - && O42615.1 RecName: Full=Threonine dehydratase, mitochondrial; AltName: Full=Threonine deaminase; Flags: Precursor && PF00291:Pyridoxal-phosphate dependent enzyme PF00585:C-terminal regulatory domain of Threonine dehydratase |
| Lachesis_group0__13_contigs__l.g1320  | 438.489  | 1264.483 | -1.52817 | 0.005668 | 0.031585 | 1848 | - && - && PF03007:Wax ester synthase-like Acyl-CoA acyltransferase domain PF06974:Protein of unknown function (DUF1298)                                                                                                             |
| Lachesis_group0__13_contigs__l.g10682 | 10602.69 | 30664.98 | -1.53217 | 0.000126 | 0.002118 | 1206 | - && Q9UUA1.2 RecName: Full=Oxysterol-binding protein homolog C23B6.01c && PF01237:Oxysterol-binding protein                                                                                                                        |
| Lachesis_group0__13_contigs__l.g5236  | 21614.72 | 62528.49 | -1.5325  | 0.005734 | 0.031823 | 3210 | - && - && PF04082:Fungal specific transcription factor domain                                                                                                                                                                       |
| Lachesis_group0__13_contigs__l.g2526  | 68.23822 | 197.228  | -1.53294 | 0.009849 | 0.046825 | 1137 | - && O31463.1 RecName: Full=Homocysteine S-methyltransferase YbgG; AltName: Full=S-methylmethionine:homocysteine methyltransferase && PF02574:Homocysteine S-methyltransferase                                                      |
| Lachesis_group0__13_contigs__l.g8530  | 2413.385 | 7012.377 | -1.53887 | 0.00382  | 0.023794 | 1479 | - && B7STY2.1 RecName: Full=L-tyrosine:2-oxoglutarate aminotransferase atrD; AltName: Full=Atromentin biosynthesis protein D && PF00155:Aminotransferase class I and II                                                             |

|                                      |          |          |          |          |          |      |                                                                                                                                                                                                                                                                                                                            |
|--------------------------------------|----------|----------|----------|----------|----------|------|----------------------------------------------------------------------------------------------------------------------------------------------------------------------------------------------------------------------------------------------------------------------------------------------------------------------------|
| Lachesis_group0__13_contigs__l.g1311 | 87.46576 | 254.2656 | -1.5397  | 0.010551 | 0.049085 | 2817 | - && Q9URY6.1 RecName: Full=Probable urea active transporter 3 && PF00474:Sodium:solute symporter family PF00011:Hsp20/alpha crystallin family                                                                                                                                                                             |
| Lachesis_group0__13_contigs__l.g7958 | 1922.78  | 5633.404 | -1.55092 | 0.001766 | 0.013753 | 1944 | - && P87035.1 RecName: Full=Guanine nucleotide-binding protein alpha-4 subunit && PF00503:G-protein alpha subunit                                                                                                                                                                                                          |
| Lachesis_group0__13_contigs__l.g1239 | 123.246  | 361.2849 | -1.55158 | 0.000589 | 0.006271 | 4284 | - && Q5UQ40.1 RecName: Full=Probable bifunctional E2/E3 enzyme R795; Includes: RecName: Full=E3 ubiquitin-protein ligase; AltName: Full=RING-type E3 ubiquitin transferase; Includes: RecName: Full=Ubiquitin-conjugating enzyme E2; AltName: Full=E2 ubiquitin-conjugating enzyme && PF00179:Ubiquitin-conjugating enzyme |
| Lachesis_group0__13_contigs__l.g5152 | 178.2769 | 522.7128 | -1.55295 | 0.002718 | 0.018714 | 1971 | - && Q9TT38.1 RecName: Full=Cytosolic phospholipase A2; Short=cPLA2; AltName: Full=Phospholipase A2 group IVA; Includes: RecName: Full=Phospholipase A2; AltName: Full=Phosphatidylcholine 2-acylhydrolase; Includes: RecName: Full=Lysophospholipase && PF01735:Lysophospholipase catalytic domain                        |
| Lachesis_group0__13_contigs__l.g7314 | 123.0522 | 361.4581 | -1.55576 | 0.003661 | 0.023143 | 5442 | - && - && PF12770:CHAT domain                                                                                                                                                                                                                                                                                              |
| Lachesis_group0__13_contigs__l.g8402 | 4461.032 | 13123.16 | -1.55668 | 0.004657 | 0.027475 | 4155 | - && O14283.2 RecName: Full=Transcription factor prr1; AltName: Full=Pombe response regulator 1 && PF00447:HSF-type DNA-binding PF00072:Response regulator receiver domain                                                                                                                                                 |

|                                      |          |          |          |          |          |      |                                                                                                                                                                                                                                                                                                                                                                                                                                                                    |
|--------------------------------------|----------|----------|----------|----------|----------|------|--------------------------------------------------------------------------------------------------------------------------------------------------------------------------------------------------------------------------------------------------------------------------------------------------------------------------------------------------------------------------------------------------------------------------------------------------------------------|
| Lachesis_group0__13_contigs__l.g4834 | 1154.306 | 3395.573 | -1.55686 | 0.00336  | 0.021772 | 1062 | - && Q9P7F4.1 RecName: Full=Zinc-type alcohol dehydrogenase-like protein C2E1P3.01 && PF08240:Alcohol dehydrogenase GroES-like domain PF00107:Zinc-binding dehydrogenase                                                                                                                                                                                                                                                                                           |
| Lachesis_group0__13_contigs__l.g4228 | 383.5028 | 1128.082 | -1.55706 | 0.006082 | 0.033212 | 3066 | - && Q556W1.1 RecName: Full=D-aspartate oxidase; Short=DASOX; AltName: Full=DDO && PF01266:FAD dependent oxidoreductase                                                                                                                                                                                                                                                                                                                                            |
| Lachesis_group0__13_contigs__l.g5820 | 50.93301 | 150.0069 | -1.55834 | 0.003511 | 0.022484 | 1401 | - && D4AUF4.1 RecName: Full=WSC domain-containing protein ARB_07870; Flags: Precursor && PF09362:Domain of unknown function (DUF1996) PF01822:WSC domain                                                                                                                                                                                                                                                                                                           |
| Lachesis_group0__13_contigs__l.g6317 | 2978.019 | 8785.554 | -1.56078 | 0.000701 | 0.007147 | 1269 | - && Q9DBL1.1 RecName: Full=Short/branched chain specific acyl-CoA dehydrogenase, mitochondrial; Short=SBCAD; AltName: Full=2-methyl branched chain acyl-CoA dehydrogenase; Short=2-MEBCAD; AltName: Full=2-methylbutyryl-coenzyme A dehydrogenase; Short=2-methylbutyryl-CoA dehydrogenase; Flags: Precursor && PF00441:Acyl-CoA dehydrogenase, C-terminal domain PF02770:Acyl-CoA dehydrogenase, middle domain PF02771:Acyl-CoA dehydrogenase, N-terminal domain |
| Lachesis_group0__13_contigs__l.g2906 | 220.9357 | 653.1955 | -1.56407 | 0.000244 | 0.003325 | 1617 | - && P17549.1 RecName: Full=Benzoate 4-monooxygenase; AltName: Full=Benzoate-para-hydroxylase; Short=BpH; AltName: Full=Cytochrome P450 53 && PF00067:Cytochrome P450                                                                                                                                                                                                                                                                                              |

|                                       |          |          |          |          |          |      |                                                                                                                                                                               |
|---------------------------------------|----------|----------|----------|----------|----------|------|-------------------------------------------------------------------------------------------------------------------------------------------------------------------------------|
| Lachesis_group0__13_contigs__l.g3145  | 799.2189 | 2365.328 | -1.56541 | 0.002707 | 0.018665 | 1869 | - && A1CPX0.1 RecName: Full=Probable quinate permease; AltName: Full=Quinate transporter && PF00083:Sugar (and other) transporter                                             |
| Lachesis_group0__13_contigs__l.g6702  | 2406.147 | 7138.924 | -1.569   | 0.001156 | 0.010181 | 2061 | - && O94913.3 RecName: Full=Pre-mRNA cleavage complex 2 protein Pcf11; AltName: Full=Pre-mRNA cleavage complex II protein Pcf11 && PF04818:RNA polymerase II-binding domain.  |
| Lachesis_group0__13_contigs__l.g9927  | 66.09025 | 196.3473 | -1.57012 | 0.007095 | 0.037212 | 2304 | - && Q9C1X1.1 RecName: Full=Periodic tryptophan protein 2 homolog && PF00400:WD domain, G-beta repeat                                                                         |
| Lachesis_group0__13_contigs__l.g2168  | 1062.8   | 3157.317 | -1.5708  | 0.00035  | 0.004295 | 1887 | - && Q9N2V6.3 RecName: Full=Guanine nucleotide-binding protein alpha-16 subunit && PF00503:G-protein alpha subunit                                                            |
| Lachesis_group0__13_contigs__l.g9683  | 4429.684 | 13160.84 | -1.57098 | 0.004198 | 0.025478 | 1131 | - && P07250.1 RecName: Full=Inositol polyphosphate multikinase; Short=IPMK; AltName: Full=Arginine metabolism regulation protein III && PF03770:Inositol polyphosphate kinase |
| Lachesis_group0__13_contigs__l.g717   | 386.9264 | 1152.481 | -1.57504 | 0.009865 | 0.046827 | 2310 | - && Q942X8.1 RecName: Full=Probable potassium transporter 2; AltName: Full=OsHAK2 && PF02705:K+ potassium transporter                                                        |
| Lachesis_group0__13_contigs__l.g10260 | 74.32044 | 222.4516 | -1.58219 | 0.001609 | 0.012792 | 2925 | - && Q804S5.1 RecName: Full=E3 ubiquitin-protein ligase mib1; AltName: Full=Protein mind bomb && PF00569:Zinc finger, ZZ type                                                 |
| Lachesis_group0__13_contigs__l.g11062 | 2507.165 | 7555.846 | -1.59154 | 0.000301 | 0.003877 | 2691 | - && - && PF13886:Domain of unknown function (DUF4203)                                                                                                                        |
| Lachesis_group0__13_contigs__l.g3381  | 49.51954 | 149.0501 | -1.59196 | 0.002471 | 0.017509 | 591  | - && B6CHA3.1 RecName: Full=E3 ubiquitin-protein ligase UHRF1; AltName: Full=Nuclear zinc                                                                                     |

|                                       |          |          |          |          |          |      |                                                                                                                                                                                                                         |
|---------------------------------------|----------|----------|----------|----------|----------|------|-------------------------------------------------------------------------------------------------------------------------------------------------------------------------------------------------------------------------|
|                                       |          |          |          |          |          |      | finger protein Np95; Short=XNp95; AltName: Full=Ubiquitin-like PHD and RING finger domain-containing protein 1; AltName: Full=Ubiquitin-like-containing PHD and RING finger domains protein 1 && PF02182:SAD/SRA domain |
| Lachesis_group0__13_contigs__l.g11378 | 269.0555 | 813.0034 | -1.59564 | 0.002742 | 0.01881  | 1128 | - && - && PF01485:IBR domain, a half RING-finger domain                                                                                                                                                                 |
| Lachesis_group0__13_contigs__l.g9829  | 441.2462 | 1333.865 | -1.59591 | 0.000184 | 0.002724 | 1815 | - && Q08970.2 RecName: Full=Mitochondrial metal transporter 2; Flags: Precursor && PF01545:Cation efflux family                                                                                                         |
| Lachesis_group0__13_contigs__l.g8714  | 350.0073 | 1058.13  | -1.59632 | 0.003727 | 0.023372 | 918  | - && Q8K370.1 RecName: Full=Acyl-CoA dehydrogenase family member 10; Short=ACAD-10 && PF13419:Haloacid dehalogenase-like hydrolase                                                                                      |
| Lachesis_group0__13_contigs__l.g6186  | 336.7162 | 1023.976 | -1.60502 | 0.001563 | 0.012533 | 4623 | - && - && PF00400:WD domain, G-beta repeat PF07971:Glycosyl hydrolase family 92                                                                                                                                         |
| Lachesis_group0__13_contigs__l.g11441 | 70.44141 | 214.3188 | -1.60515 | 0.001956 | 0.014841 | 1599 | - && P29026.1 RecName: Full=Chitinase 1; Flags: Precursor && PF02839:Carbohydrate binding domain PF00704:Glycosyl hydrolases family 18                                                                                  |
| Lachesis_group0__13_contigs__l.g6883  | 1062.539 | 3234.223 | -1.60591 | 0.000423 | 0.004942 | 3471 | - && P0CT24.1 RecName: Full=Glucosidase 2 subunit beta; AltName: Full=Alpha-glucosidase 2 subunit beta; Flags: Precursor && PF12999:Glucosidase II beta subunit-like PF13015:Glucosidase II beta subunit-like protein   |
| Lachesis_group0__13_contigs__l.g11656 | 894.3152 | 2736.21  | -1.61338 | 0.002404 | 0.01724  | 1923 | - && P10281.2 RecName: Full=Ribonuclease T2; Short=RNase T2; Flags: Precursor && PF00445:Ribonuclease T2 family                                                                                                         |
| Lachesis_group0__13_contigs__l.g11123 | 33596.81 | 102844.2 | -1.61406 | 0.000501 | 0.005613 | 2772 | - && - && PF00564:PB1 domain                                                                                                                                                                                            |

|                                       |          |          |          |          |          |      |                                                                                                                                                                   |
|---------------------------------------|----------|----------|----------|----------|----------|------|-------------------------------------------------------------------------------------------------------------------------------------------------------------------|
| Lachesis_group0__13_contigs__l.g11466 | 1789.514 | 5486.031 | -1.6163  | 0.00169  | 0.013251 | 3792 | - && Q9V3C5.1 RecName: Full=Guanine nucleotide exchange factor subunit Rich; AltName: Full=Protein RIC1 homolog && PF04707:PRELI-like family PF07064:RIC1         |
| Lachesis_group0__13_contigs__l.g3214  | 25.13045 | 76.88332 | -1.61893 | 0.010259 | 0.048054 | 2151 | - && F4JTP5.1 RecName: Full=Serine/threonine-protein kinase STY46; AltName: Full=Serine/threonine/tyrosine-protein kinase 46 && PF07714:Protein tyrosine kinase   |
| Lachesis_group0__13_contigs__l.g8897  | 828.1351 | 2550.938 | -1.62318 | 0.005946 | 0.032688 | 2439 | - && O94289.2 RecName: Full=Ubiquitin homeostasis protein lub1 && PF00400:WD domain, G-beta repeat PF08324:PUL domain PF09070:PFU (PLAA family ubiquitin binding) |
| Lachesis_group0__13_contigs__l.g3078  | 340.324  | 1048.759 | -1.62344 | 0.000199 | 0.002924 | 2298 | - && - && PF00294:pfkB family carbohydrate kinase                                                                                                                 |
| Lachesis_group0__13_contigs__l.g2807  | 24643.94 | 75982.09 | -1.62443 | 0.002142 | 0.015825 | 570  | - && - && PF00011:Hsp20/alpha crystallin family                                                                                                                   |
| Lachesis_group0__13_contigs__l.g3569  | 201.8461 | 622.8931 | -1.62636 | 0.000244 | 0.003323 | 3426 | - && P34422.2 RecName: Full=Dipeptidyl peptidase family member 6 && PF00326:Prolyl oligopeptidase family                                                          |
| Lachesis_group0__13_contigs__l.g4144  | 92.63812 | 286.139  | -1.62738 | 0.004898 | 0.028534 | 1809 | - && - && PF00651:BTB/POZ domain                                                                                                                                  |
| Lachesis_group0__13_contigs__l.g128   | 31.82036 | 98.52048 | -1.6309  | 0.004909 | 0.028545 | 1398 | - && P23262.4 RecName: Full=Salicylate hydroxylase; AltName: Full=Salicylate 1-monooxygenase && PF01494:FAD binding domain                                        |
| Lachesis_group0__13_contigs__l.g1929  | 1268.34  | 3929.656 | -1.63165 | 0.006892 | 0.036335 | 804  | - && P42058.1 RecName: Full=Minor allergen Alt a 7; AltName: Full=Allergen Alt a VII; AltName: Allergen=Alt a 7 && PF03358:NADPH-dependent FMN reductase          |
| Lachesis_group0__13_contigs__l.g11374 | 26.36975 | 81.67678 | -1.63446 | 0.006586 | 0.035079 | 1695 | - && - && PF01485:IBR domain, a half RING-finger domain                                                                                                           |

|                                      |          |          |          |          |          |      |                                                                                                                                                                                             |
|--------------------------------------|----------|----------|----------|----------|----------|------|---------------------------------------------------------------------------------------------------------------------------------------------------------------------------------------------|
| Lachesis_group0__13_contigs__l.g3044 | 134.3459 | 416.99   | -1.63448 | 0.003835 | 0.023875 | 1395 | - && Q00023.1 RecName: Full=Cellulose-growth-specific protein; Flags: Precursor && PF00734:Fungal cellulose binding domain PF03443:Glycosyl hydrolase family 61                             |
| Lachesis_group0__13_contigs__l.g3063 | 1750.931 | 5437.637 | -1.63491 | 0.000141 | 0.002307 | 708  | - && Q7ZV68.1 RecName: Full=Vacuolar protein sorting-associated protein 29; AltName: Full=Vesicle protein sorting 29 && PF12850:Calcineurin-like phosphoesterase superfamily domain         |
| Lachesis_group0__13_contigs__l.g1534 | 535.0431 | 1661.87  | -1.63549 | 0.000304 | 0.003896 | 5208 | - && Q9UUG9.1 RecName: Full=Tuberous sclerosis 2 protein homolog && PF03542:Tuberin PF02145:Rap/ran-GAP                                                                                     |
| Lachesis_group0__13_contigs__l.g1860 | 495.9817 | 1543.494 | -1.63786 | 0.00194  | 0.014784 | 1386 | - && Q4WAZ6.1 RecName: Full=Multifunctional cytochrome P450 monooxygenase af510; AltName: Full=Fumagillin bioynthesis cluster P450 monooxygenase; Short=Fma-P450 && PF00067:Cytochrome P450 |
| Lachesis_group0__13_contigs__l.g4565 | 51.98305 | 162.2434 | -1.64179 | 0.001197 | 0.010422 | 1416 | - && Q99252.1 RecName: Full=Protein ECM3; AltName: Full=Extracellular mutant protein 3 && PF03547:Membrane transport protein                                                                |
| Lachesis_group0__13_contigs__l.g5745 | 294.2804 | 918.9096 | -1.6428  | 0.006499 | 0.034749 | 1056 | - && - && PF01753:MYND finger                                                                                                                                                               |
| Lachesis_group0__13_contigs__l.g2884 | 996.4632 | 3121.04  | -1.6472  | 0.000773 | 0.00765  | 1236 | - && Q9Y7K9.3 RecName: Full=PARP-type zinc finger-containing protein C2A9.07c && PF00645:Poly(ADP-ribose) polymerase and DNA-Ligase Zn-finger region                                        |
| Lachesis_group0__13_contigs__l.g5954 | 386.6316 | 1215.974 | -1.65309 | 0.000338 | 0.004198 | 702  | - && Q6PAV8.1 RecName: Full=O-acetyl-ADP-ribose deacetylase MACROD2; AltName: Full=MACRO domain-containing protein 2;                                                                       |



|                                       |          |          |          |          |          |      |                                                                                                                                                                            |
|---------------------------------------|----------|----------|----------|----------|----------|------|----------------------------------------------------------------------------------------------------------------------------------------------------------------------------|
|                                       |          |          |          |          |          |      | AltName: Full=[Protein ADP-ribosylglutamate] hydrolase && PF01661:Macro domain                                                                                             |
| Lachesis_group0__13_contigs__l.g306   | 2362.886 | 7436.523 | -1.65411 | 0.006211 | 0.033738 | 4530 | - && Q54YW1.1 RecName: Full=ELMO domain-containing protein A && PF04727:ELMO/CED-12 family PF16457:Pleckstrin homology domain PF11841:Domain of unknown function (DUF3361) |
| Lachesis_group0__13_contigs__l.g8411  | 48.22369 | 151.4908 | -1.65417 | 0.003106 | 0.020536 | 2010 | - && P54718.1 RecName: Full=Uncharacterized ABC transporter ATP-binding protein YfiB && PF00005:ABC transporter                                                            |
| Lachesis_group0__13_contigs__l.g2059  | 109.8145 | 347.2882 | -1.66247 | 0.000566 | 0.006111 | 1734 | - && P70786.1 RecName: Full=Putative tartrate transporter && PF07690:Major Facilitator Superfamily                                                                         |
| Lachesis_group0__13_contigs__l.g9589  | 30.87511 | 97.73225 | -1.66336 | 0.003284 | 0.021404 | 819  | - && B5ZA76.1 RecName: Full=Peptidoglycan deacetylase; Short=PG deacetylase; AltName: Full=Acetylxyloesterase && PF01522:Polysaccharide deacetylase                        |
| Lachesis_group0__13_contigs__l.g5928  | 1702.076 | 5402.421 | -1.66641 | 0.000173 | 0.002621 | 525  | - && B0DX25.1 RecName: Full=Type 1 phosphatases regulator YPI1 && PF07491:Protein phosphatase inhibitor                                                                    |
| Lachesis_group0__13_contigs__l.g599   | 158.1833 | 501.8577 | -1.66676 | 0.003239 | 0.021183 | 765  | - && O14283.2 RecName: Full=Transcription factor prr1; AltName: Full=Pombe response regulator 1 && PF00447:HSF-type DNA-binding                                            |
| Lachesis_group0__13_contigs__l.g10701 | 65.65139 | 208.8641 | -1.66999 | 0.001505 | 0.012249 | 2664 | - && Q09803.1 RecName: Full=Suppressor protein of bem1/bed5 double mutants && PF04212:MIT (microtubule interacting and transport) domain PF07714:Protein tyrosine kinase   |

|                                      |          |          |          |          |          |      |                                                                                                                                                                                                                                                                     |
|--------------------------------------|----------|----------|----------|----------|----------|------|---------------------------------------------------------------------------------------------------------------------------------------------------------------------------------------------------------------------------------------------------------------------|
| Lachesis_group0__13_contigs__l.g6778 | 29.85971 | 94.85418 | -1.67027 | 0.006322 | 0.034179 | 813  | - && - && PF13527:Acetyltransferase (GNAT) domain                                                                                                                                                                                                                   |
| Lachesis_group0__13_contigs__l.g147  | 329.7295 | 1050.044 | -1.67091 | 0.00054  | 0.005915 | 1377 | - && Q9UT44.1 RecName: Full=Probable gamma-glutamyl phosphate reductase; Short=GPR; AltName: Full=Glutamate-5-semialdehyde dehydrogenase; Short=GSA dehydrogenase; AltName: Full=Glutamyl-gamma-semialdehyde dehydrogenase && PF00171:Aldehyde dehydrogenase family |
| Lachesis_group0__13_contigs__l.g6783 | 51.03863 | 162.7201 | -1.67245 | 0.001023 | 0.009423 | 1344 | - && - && PF13472:GDSL-like Lipase/Acylhydrolase family                                                                                                                                                                                                             |
| Lachesis_group0__13_contigs__l.g9163 | 88.36513 | 281.9524 | -1.67544 | 0.000856 | 0.008291 | 4614 | - && - && PF02373:JmjC domain, hydroxylase                                                                                                                                                                                                                          |
| Lachesis_group0__13_contigs__l.g2380 | 80.95633 | 258.4653 | -1.67738 | 0.006737 | 0.035676 | 1374 | - && O34714.1 RecName: Full=Oxalate decarboxylase OxdC && PF00190:Cupin                                                                                                                                                                                             |
| Lachesis_group0__13_contigs__l.g4553 | 398.2497 | 1280.51  | -1.68498 | 0.000143 | 0.002314 | 786  | - && D2WKD9.2 RecName: Full=Farnesol dehydrogenase; AltName: Full=NADP+-dependent farnesol dehydrogenase 1; Short=AaSDR-1 && PF00106:short chain dehydrogenase                                                                                                      |
| Lachesis_group0__13_contigs__l.g8868 | 311.3524 | 1001.358 | -1.68558 | 0.005855 | 0.032318 | 1788 | - && P49075.1 RecName: Full=Exoglucanase 3; AltName: Full=1,4-beta-cellobiohydrolase 3; AltName: Full=Exocellobiohydrolase 3; Flags: Precursor && PF00734:Fungal cellulose binding domain PF01341:Glycosyl hydrolases family 6                                      |
| Lachesis_group0__13_contigs__l.g2608 | 28.44312 | 91.73695 | -1.68857 | 0.005203 | 0.029761 | 969  | - && B0Y081.2 RecName: Full=Metacaspase-1B; Flags: Precursor >Q4WYT0.2 RecName: Full=Metacaspase-1B; Flags: Precursor && PF00656:Caspase domain                                                                                                                     |

|                                       |          |          |          |          |          |      |                                                                                                                                                                                                                                                                                                                                                                                                                                                                  |
|---------------------------------------|----------|----------|----------|----------|----------|------|------------------------------------------------------------------------------------------------------------------------------------------------------------------------------------------------------------------------------------------------------------------------------------------------------------------------------------------------------------------------------------------------------------------------------------------------------------------|
| Lachesis_group0__13_contigs__l.g4367  | 34.67506 | 111.8782 | -1.69235 | 0.002843 | 0.019333 | 3351 | - && B8NHY4.1 RecName: Full=O-methylsterigmatocystin oxidoreductase; Short=OMST oxidoreductase; AltName: Full=Aflatoxin B synthase; AltName: Full=Aflatoxin biosynthesis protein Q; AltName: Full=Cytochrome P450 64 >P0CT93.1 RecName: Full=O-methylsterigmatocystin oxidoreductase; Short=OMST oxidoreductase; AltName: Full=Aflatoxin B synthase; AltName: Full=Aflatoxin biosynthesis protein Q; AltName: Full=Cytochrome P450 64 && PF00067:Cytochrome P450 |
| Lachesis_group0__13_contigs__l.g5941  | 123.6543 | 400.6971 | -1.69694 | 0.001347 | 0.011328 | 1608 | - && Q4U3U4.1 RecName: Full=Quinate permease; AltName: Full=Quinate transporter && PF00083:Sugar (and other) transporter                                                                                                                                                                                                                                                                                                                                         |
| Lachesis_group0__13_contigs__l.g11140 | 258.7725 | 839.9504 | -1.69891 | 7.67E-05 | 0.001499 | 2277 | - && - && PF02838:Glycosyl hydrolase family 20, domain 2                                                                                                                                                                                                                                                                                                                                                                                                         |
| Lachesis_group0__13_contigs__l.g8161  | 224.2273 | 728.1661 | -1.69949 | 0.005577 | 0.031189 | 3516 | - && F4JTP5.1 RecName: Full=Serine/threonine-protein kinase STY46; AltName: Full=Serine/threonine/tyrosine-protein kinase 46 && PF07714:Protein tyrosine kinase                                                                                                                                                                                                                                                                                                  |
| Lachesis_group0__13_contigs__l.g8302  | 34.54365 | 112.0839 | -1.70044 | 0.002912 | 0.01963  | 1815 | - && Q92341.1 RecName: Full=Siderophore iron transporter 3 && PF07690:Major Facilitator Superfamily                                                                                                                                                                                                                                                                                                                                                              |
| Lachesis_group0__13_contigs__l.g11329 | 309.7604 | 1006.628 | -1.70102 | 0.000439 | 0.005097 | 1542 | - && P09437.2 RecName: Full=Cytochrome b2, mitochondrial; AltName: Full=L-lactate dehydrogenase [Cytochrome]; AltName: Full=L-lactate ferricytochrome C oxidoreductase; Short=L-                                                                                                                                                                                                                                                                                 |

|                                      |          |          |          |          |          |      |                                                                                                                                                                                                                                                                                                                                                                                               |
|--------------------------------------|----------|----------|----------|----------|----------|------|-----------------------------------------------------------------------------------------------------------------------------------------------------------------------------------------------------------------------------------------------------------------------------------------------------------------------------------------------------------------------------------------------|
|                                      |          |          |          |          |          |      | LCR; Flags: Precursor && PF00173:Cytochrome b5-like Heme/Steroid binding domain PF01070:FMN-dependent dehydrogenase                                                                                                                                                                                                                                                                           |
| Lachesis_group0__13_contigs__l.g8618 | 36.09146 | 117.1632 | -1.70232 | 0.002403 | 0.01724  | 1419 | - && P49374.1 RecName: Full=High-affinity glucose transporter && PF00083:Sugar (and other) transporter                                                                                                                                                                                                                                                                                        |
| Lachesis_group0__13_contigs__l.g640  | 369.4147 | 1204.059 | -1.70493 | 0.005057 | 0.029147 | 1101 | - && Q4WR80.1 RecName: Full=Probable endopolygalacturonase AFUA_1G17220; AltName: Full=Pectinase AFUA_1G17220; AltName: Full=Polygalacturonase AFUA_1G17220; Flags: Precursor >B0XPA1.1 RecName: Full=Probable endopolygalacturonase AFUB_016610; AltName: Full=Pectinase AFUB_016610; AltName: Full=Polygalacturonase AFUB_016610; Flags: Precursor && PF00295:Glycosyl hydrolases family 28 |
| Lachesis_group0__13_contigs__l.g7082 | 799.2323 | 2607.005 | -1.70592 | 0.00252  | 0.01774  | 1368 | - && Q8RWZ3.1 RecName: Full=Probable acyl-CoA dehydrogenase IBR3; AltName: Full=Protein INDOLE-3-BUTYRIC ACID RESPONSE 3 && PF00441:Acyl-CoA dehydrogenase, C-terminal domain PF02770:Acyl-CoA dehydrogenase, middle domain PF02771:Acyl-CoA dehydrogenase, N-terminal domain                                                                                                                 |
| Lachesis_group0__13_contigs__l.g2364 | 47.07221 | 153.4196 | -1.70654 | 0.002827 | 0.019264 | 2409 | - && - && PF12937:F-box-like                                                                                                                                                                                                                                                                                                                                                                  |
| Lachesis_group0__13_contigs__l.g1403 | 280.6081 | 916.0659 | -1.70679 | 0.002694 | 0.018588 | 1425 | - && P50080.1 RecName: Full=Azole resistance protein 1 && PF07690:Major Facilitator Superfamily                                                                                                                                                                                                                                                                                               |

|                                       |          |          |          |          |          |      |                                                                                                                                                                                                                  |
|---------------------------------------|----------|----------|----------|----------|----------|------|------------------------------------------------------------------------------------------------------------------------------------------------------------------------------------------------------------------|
| Lachesis_group0__13_contigs__l.g765   | 238.9406 | 781.3715 | -1.7094  | 0.000847 | 0.008255 | 1395 | - && P25390.2 RecName: Full=Serine/threonine-protein kinase SSK22; AltName: Full=MAP kinase kinase kinase SSK22; AltName: Full=Suppressor of sensor kinase 22 && PF07714:Protein tyrosine kinase                 |
| Lachesis_group0__13_contigs__l.g7993  | 1759.614 | 5757.148 | -1.71017 | 0.00016  | 0.002507 | 582  | - && - && PF01476:LysM domain                                                                                                                                                                                    |
| Lachesis_group0__13_contigs__l.g8715  | 10212.33 | 33421.77 | -1.71048 | 0.002204 | 0.016142 | 3030 | - && Q9ULC5.1 RecName: Full=Long-chain-fatty-acid--CoA ligase 5; AltName: Full=Long-chain acyl-CoA synthetase 5; Short=LACS 5 && PF13499:EF-hand domain pair PF00501:AMP-binding enzyme                          |
| Lachesis_group0__13_contigs__l.g654   | 150.1421 | 492.7679 | -1.71384 | 0.002888 | 0.019541 | 2025 | - && Q54DY9.1 RecName: Full=Probable mitochondrial chaperone BCS1-B; AltName: Full=BCS1-like protein 2 && PF00004:ATPase family associated with various cellular activities (AAA) PF08740:BCS1 N terminal        |
| Lachesis_group0__13_contigs__l.g2600  | 1065.86  | 3500.331 | -1.7155  | 0.001093 | 0.009864 | 2562 | - && Q54DU5.1 RecName: Full=von Willebrand factor A domain-containing protein DDB_G0292028 && PF13768:von Willebrand factor type A domain PF08487:Vault protein inter-alpha-trypsin domain                       |
| Lachesis_group0__13_contigs__l.g11654 | 2965.687 | 9765.142 | -1.7193  | 0.001669 | 0.013139 | 1098 | - && Q9ZWQ9.1 RecName: Full=Flavonol synthase/flavanone 3-hydroxylase; AltName: Full=CitFLS; Short=FLS && PF03171:2OG-Fe(II) oxygenase superfamily PF14226:non-haem dioxygenase in morphine synthesis N-terminal |
| Lachesis_group0__13_contigs__l.g7954  | 115.2407 | 380.6274 | -1.72442 | 0.000148 | 0.002366 | 3099 | - && Q13546.3 RecName: Full=Receptor-interacting serine/threonine-protein kinase 1; AltName: Full=Cell death protein RIP; AltName:                                                                               |

|                                       |          |          |          |          |          |      |                                                                                                                                                                                                                                                                                                         |
|---------------------------------------|----------|----------|----------|----------|----------|------|---------------------------------------------------------------------------------------------------------------------------------------------------------------------------------------------------------------------------------------------------------------------------------------------------------|
|                                       |          |          |          |          |          |      | Full=Receptor-interacting protein 1; Short=RIP-1; AltName: Full=Serine/threonine-protein kinase RIP && PF07714:Protein tyrosine kinase                                                                                                                                                                  |
| Lachesis_group0__13_contigs__l.g1026  | 150.3457 | 496.8954 | -1.72507 | 4.57E-05 | 0.001008 | 1722 | - && Q86UW6.2 RecName: Full=NEDD4-binding protein 2; Short=N4BP2; AltName: Full=BCL-3-binding protein && PF08590:Domain of unknown function (DUF1771) PF01713:Smr domain                                                                                                                                |
| Lachesis_group0__13_contigs__l.g9920  | 170.4277 | 563.4348 | -1.72602 | 0.00144  | 0.011839 | 1443 | - && A2QEQ6.1 RecName: Full=Beta-glucuronidase; Short=GlcAase; AltName: Full=Beta-D-glucuronoside glucuronosohydrolase; Flags: Precursor && PF16862:Glycosyl hydrolase family 79 C-terminal beta domain                                                                                                 |
| Lachesis_group0__13_contigs__l.g721   | 217.2972 | 719.0553 | -1.72631 | 0.002079 | 0.015527 | 2298 | - && O22881.2 RecName: Full=Potassium transporter 2; Short=AtKT2; Short=AtKUP2; Short=AtPOT2 && PF02705:K+ potassium transporter                                                                                                                                                                        |
| Lachesis_group0__13_contigs__l.g1471  | 364.5472 | 1206.151 | -1.7264  | 0.000295 | 0.003822 | 1383 | - && - && PF00107:Zinc-binding dehydrogenase PF16884:N-terminal domain of oxidoreductase                                                                                                                                                                                                                |
| Lachesis_group0__13_contigs__l.g10687 | 2169.058 | 7183.051 | -1.72752 | 0.000749 | 0.007473 | 1050 | - && Q8YVU6.2 RecName: Full=Porphobilinogen deaminase; Short=PBG; AltName: Full=Hydroxymethylbilane synthase; Short=HMBS; AltName: Full=Pre-uroporphyrinogen synthase && PF01379:Porphobilinogen deaminase, dipyrromethane cofactor binding domain PF03900:Porphobilinogen deaminase, C-terminal domain |

|                                       |          |          |          |          |          |      |                                                                                                                                                                                |
|---------------------------------------|----------|----------|----------|----------|----------|------|--------------------------------------------------------------------------------------------------------------------------------------------------------------------------------|
| Lachesis_group0__13_contigs__l.g612   | 153.9941 | 510.0957 | -1.7284  | 0.002426 | 0.017307 | 4908 | - && Q9USW3.1 RecName: Full=Probable glycosidase C21B10.07 && PF00501:AMP-binding enzyme PF07993:Male sterility protein                                                        |
| Lachesis_group0__13_contigs__l.g1287  | 116.9258 | 388.5931 | -1.73316 | 0.000225 | 0.003174 | 615  | - && - && PF01822:WSC domain                                                                                                                                                   |
| Lachesis_group0__13_contigs__l.g10407 | 51343.9  | 170785.5 | -1.73392 | 0.000224 | 0.003166 | 432  | - && D4ALV6.1 RecName: Full=Allergen Asp f 15 homolg && PF07249:Cerato-platanin                                                                                                |
| Lachesis_group0__13_contigs__l.g11243 | 1289.256 | 4298.225 | -1.73728 | 0.000581 | 0.006202 | 552  | - && - && PF13424:Tetratricopeptide repeat PF01753:MYND finger                                                                                                                 |
| Lachesis_group0__13_contigs__l.g8405  | 411.9513 | 1373.782 | -1.73777 | 0.000292 | 0.003794 | 3213 | - && O14283.2 RecName: Full=Transcription factor prr1; AltName: Full=Pombe response regulator 1 && PF00447:HSF-type DNA-binding                                                |
| Lachesis_group0__13_contigs__l.g3882  | 320.6456 | 1070.666 | -1.74005 | 0.000516 | 0.005715 | 1389 | - && O15975.1 RecName: Full=Guanine nucleotide-binding protein G(q) subunit alpha; AltName: Full=Guanine nucleotide-binding protein alpha-q && PF00503:G-protein alpha subunit |
| Lachesis_group0__13_contigs__l.g2222  | 183.0485 | 611.4348 | -1.74077 | 0.00173  | 0.01352  | 1158 | - && Q01752.1 RecName: Full=Aryl-alcohol dehydrogenase [NADP(+)]; Short=AAD && PF00248:Aldo/keto reductase family                                                              |
| Lachesis_group0__13_contigs__l.g11048 | 33.30329 | 111.0554 | -1.74091 | 0.003585 | 0.022785 | 1527 | - && Q9P6J0.1 RecName: Full=Uncharacterized transporter C1683.12 && PF07690:Major Facilitator Superfamily                                                                      |
| Lachesis_group0__13_contigs__l.g7662  | 91.95722 | 307.6533 | -1.74263 | 0.00051  | 0.005684 | 2667 | - && P08159.2 RecName: Full=6-hydroxy-D-nicotine oxidase; Short=6-HDNO && PF08031:Berberine and berberine like PF01565:FAD binding domain                                      |
| Lachesis_group0__13_contigs__l.g10893 | 118.131  | 396.2802 | -1.7472  | 0.002617 | 0.018161 | 1092 | - && Q4X084.1 RecName: Full=Probable endo-1,3(4)-beta-glucanase AFUA_2G14360; AltName: Full=Mixed-linked glucanase AFUA_2G14360;                                               |

|                                      |          |          |          |          |          |      |                                                                                                                                                                                                                      |
|--------------------------------------|----------|----------|----------|----------|----------|------|----------------------------------------------------------------------------------------------------------------------------------------------------------------------------------------------------------------------|
|                                      |          |          |          |          |          |      | Flags: Precursor >B0XTU6.1 RecName: Full=Probable endo-1,3(4)-beta-glucanase AFUB_029980; AltName: Full=Mixed-linked glucanase AFUB_029980; Flags: Precursor && -                                                    |
| Lachesis_group0__13_contigs__l.g990  | 161.729  | 543.014  | -1.74807 | 0.001934 | 0.014751 | 2844 | - && Q4WAZ6.1 RecName: Full=Multifunctional cytochrome P450 monooxygenase af510; AltName: Full=Fumagillin bioynthesis cluster P450 monooxygenase; Short=Fma-P450 && PF00067:Cytochrome P450                          |
| Lachesis_group0__13_contigs__l.g5160 | 1672.295 | 5619.229 | -1.7486  | 0.000171 | 0.002595 | 990  | - && O23300.1 RecName: Full=Enoyl-CoA delta isomerase 3; AltName: Full=3-hydroxyacyl-CoA dehydratase 1; AltName: Full=Delta(3),Delta(2)-enoyl CoA isomerase 3; Short=AtECI3 && PF00378:Enoyl-CoA hydratase/isomerase |
| Lachesis_group0__13_contigs__l.g4424 | 3446.692 | 11592.64 | -1.74994 | 0.0059   | 0.032481 | 3249 | - && S0DXJ2.1 RecName: Full=Non-canonical non-ribosomal peptide synthetase FUB8; AltName: Full=Fusaric acid biosynthesis protein 8 && PF07993:Male sterility protein PF00501:AMP-binding enzyme                      |
| Lachesis_group0__13_contigs__l.g1982 | 2277.492 | 7669.161 | -1.75163 | 0.000146 | 0.002354 | 330  | - && - && PF12585:Protein of unknown function (DUF3759)                                                                                                                                                              |
| Lachesis_group0__13_contigs__l.g2202 | 76.16464 | 256.2304 | -1.75201 | 0.001497 | 0.012219 | 1566 | - && O60020.1 RecName: Full=Aspartic protease; Flags: Precursor && PF00026:Eukaryotic aspartyl protease                                                                                                              |
| Lachesis_group0__13_contigs__l.g8672 | 21.29457 | 71.69382 | -1.75349 | 0.009522 | 0.045567 | 1674 | - && P42251.3 RecName: Full=Alkaline phosphatase D; Short=APaseD; Flags: Precursor && PF09423:PhoD-like                                                                                                              |



|                                       |          |          |          |          |          |      |                                                                                                                                                                                                                                                                                                                                                       |
|---------------------------------------|----------|----------|----------|----------|----------|------|-------------------------------------------------------------------------------------------------------------------------------------------------------------------------------------------------------------------------------------------------------------------------------------------------------------------------------------------------------|
|                                       |          |          |          |          |          |      | phosphatase PF16655:PhoD-like phosphatase, N-terminal domain                                                                                                                                                                                                                                                                                          |
| Lachesis_group0__13_contigs__l.g4981  | 14868.46 | 50149.94 | -1.754   | 6.86E-05 | 0.001374 | 4215 | - && Q7S4N5.2 RecName: Full=Metacaspase-1B; Flags: Precursor && PF00656:Caspase domain                                                                                                                                                                                                                                                                |
| Lachesis_group0__13_contigs__l.g10410 | 2017.249 | 6807.035 | -1.75468 | 0.000907 | 0.008631 | 564  | - && - && PF06687:SUR7/PaII family                                                                                                                                                                                                                                                                                                                    |
| Lachesis_group0__13_contigs__l.g11203 | 267.3413 | 904.0662 | -1.75763 | 0.000162 | 0.002523 | 681  | - && - && PF01975:Survival protein SurE                                                                                                                                                                                                                                                                                                               |
| Lachesis_group0__13_contigs__l.g9149  | 1191.161 | 4030.808 | -1.75872 | 0.000716 | 0.007231 | 2418 | - && Q9CPY6.1 RecName: Full=Glucose-induced degradation protein 4 homolog; AltName: Full=Vacuolar import and degradation protein 24 homolog && PF09783:Vacuolar import and degradation protein                                                                                                                                                        |
| Lachesis_group0__13_contigs__l.g11236 | 3802.636 | 12870.01 | -1.75896 | 0.009569 | 0.045703 | 2700 | - && O94641.1 RecName: Full=Heat shock protein 104; AltName: Full=Protein aggregation-remodeling factor hsp104 && PF07724:AAA domain (Cdc48 subfamily) PF00004:ATPase family associated with various cellular activities (AAA) PF10431:C-terminal, D2-small domain, of ClpB protein PF02861:Clp amino terminal domain, pathogenicity island component |
| Lachesis_group0__13_contigs__l.g107   | 700.0187 | 2370.923 | -1.76008 | 0.000527 | 0.0058   | 933  | - && - && PF04479:RTA1 like protein                                                                                                                                                                                                                                                                                                                   |
| Lachesis_group0__13_contigs__l.g590   | 1742.484 | 5907.971 | -1.76156 | 4.49E-05 | 0.001    | 5571 | - && Q5B4Z3.2 RecName: Full=Cytokinesis protein sepH; AltName: Full=Serine/threonine-protein kinase sepH && PF00069:Protein kinase domain PF00307:Calponin homology (CH) domain PF00130:Phorbol esters/diacylglycerol binding domain (C1 domain)                                                                                                      |

|                                       |          |          |          |          |          |      |                                                                                                                                                                                                                                                                            |
|---------------------------------------|----------|----------|----------|----------|----------|------|----------------------------------------------------------------------------------------------------------------------------------------------------------------------------------------------------------------------------------------------------------------------------|
| Lachesis_group0__13_contigs__l.g7705  | 263.5242 | 896.0849 | -1.76582 | 0.005757 | 0.031902 | 1035 | - && Q568Z6.1 RecName: Full=IST1 homolog && PF03398:Regulator of Vps4 activity in the MVB pathway                                                                                                                                                                          |
| Lachesis_group0__13_contigs__l.g6467  | 530.2749 | 1805.231 | -1.76784 | 0.001516 | 0.01231  | 1848 | - && Q3KJ31.1 RecName: Full=Lipid A export ATP-binding/permease protein MsbA && PF00005:ABC transporter                                                                                                                                                                    |
| Lachesis_group0__13_contigs__l.g4384  | 45.56565 | 154.9898 | -1.76837 | 0.002946 | 0.019738 | 1506 | - && Q4WAZ6.1 RecName: Full=Multifunctional cytochrome P450 monooxygenase af510; AltName: Full=Fumagillin bioynthesis cluster P450 monooxygenase; Short=Fma-P450 && PF00067:Cytochrome P450                                                                                |
| Lachesis_group0__13_contigs__l.g8968  | 57.57635 | 196.5692 | -1.77233 | 0.000296 | 0.003824 | 1074 | - && Q96HA8.2 RecName: Full=Protein N-terminal glutamine amidohydrolase; AltName: Full=Protein NH2-terminal glutamine deamidase; Short=N-terminal Gln amidase; Short=Nt(Q)-amidase; AltName: Full=WDYHV motif-containing protein 1 && PF09764:N-terminal glutamine amidase |
| Lachesis_group0__13_contigs__l.g3623  | 481.9576 | 1646.493 | -1.77279 | 0.001008 | 0.009329 | 3006 | - && Q7XSA2.3 RecName: Full=Protein argonaute 1B; Short=OsAGO1b && PF16488:Argonaute linker 2 domain PF08699:Argonaute linker 1 domain PF02170:PAZ domain PF16486:N-terminal domain of argonaute PF02171:Piwi domain                                                       |
| Lachesis_group0__13_contigs__l.g4410  | 28.28577 | 96.642   | -1.77622 | 0.001465 | 0.012009 | 2118 | - && - && PF00076:RNA recognition motif. (a.k.a. RRM, RBD, or RNP domain)                                                                                                                                                                                                  |
| Lachesis_group0__13_contigs__l.g10183 | 1175.401 | 4032.768 | -1.77857 | 8.57E-06 | 0.000305 | 1815 | - && Q7SEY9.1 RecName: Full=Endoplasmic reticulum oxidoreductin-1; Flags: Precursor &&                                                                                                                                                                                     |

|                                       |          |          |          |          |          |      |                                                                                                                                                                                                   |
|---------------------------------------|----------|----------|----------|----------|----------|------|---------------------------------------------------------------------------------------------------------------------------------------------------------------------------------------------------|
|                                       |          |          |          |          |          |      | PF04137:Endoplasmic Reticulum Oxidoreductin 1 (ERO1)                                                                                                                                              |
| Lachesis_group0__13_contigs__l.g11122 | 126.046  | 432.7533 | -1.77934 | 0.000115 | 0.001995 | 1677 | - && P47013.1 RecName: Full=Dihydrosphingosine 1-phosphate phosphatase LCB3; AltName: Full=Long-chain base protein 3; AltName: Full=Sphingolipid resistance protein 2 && PF01569:PAP2 superfamily |
| Lachesis_group0__13_contigs__l.g10242 | 72.85642 | 249.7439 | -1.77959 | 0.001144 | 0.010132 | 1716 | - && P39992.1 RecName: Full=Uncharacterized protein YEL023C && PF09994:Uncharacterized alpha/beta hydrolase domain (DUF2235)                                                                      |
| Lachesis_group0__13_contigs__l.g8721  | 4836.358 | 16607.18 | -1.77982 | 0.000463 | 0.005295 | 1617 | - && P25390.2 RecName: Full=Serine/threonine-protein kinase SSK22; AltName: Full=MAP kinase kinase kinase SSK22; AltName: Full=Suppressor of sensor kinase 22 && PF00069:Protein kinase domain    |
| Lachesis_group0__13_contigs__l.g716   | 187.9779 | 645.2224 | -1.77986 | 0.001917 | 0.014684 | 1473 | - && - && PF01266:FAD dependent oxidoreductase                                                                                                                                                    |
| Lachesis_group0__13_contigs__l.g1248  | 107.6739 | 369.6749 | -1.78154 | 0.00131  | 0.011127 | 2037 | - && - && PF05592:Bacterial alpha-L-rhamnosidase                                                                                                                                                  |
| Lachesis_group0__13_contigs__l.g2843  | 6888.139 | 23705.37 | -1.78304 | 0.000289 | 0.003783 | 1518 | - && Q9URW6.1 RecName: Full=SH3 domain-containing protein PJ696.02 && PF04366:Las17-binding protein actin regulator PF00018:SH3 domain                                                            |
| Lachesis_group0__13_contigs__l.g8835  | 7480.133 | 25744.65 | -1.78315 | 0.00104  | 0.009549 | 849  | - && O74631.1 RecName: Full=Protein FDD123; AltName: Full=CvHSP30/1 && PF01036:Bacteriorhodopsin-like protein                                                                                     |
| Lachesis_group0__13_contigs__l.g568   | 17911.03 | 61681.03 | -1.78399 | 0.000237 | 0.00327  | 1626 | - && Q12300.1 RecName: Full=High-affinity glucose transporter RGT2 && PF00083:Sugar (and other) transporter                                                                                       |

|                                       |          |          |          |          |          |      |                                                                                                                                                                                                                                                                                                     |
|---------------------------------------|----------|----------|----------|----------|----------|------|-----------------------------------------------------------------------------------------------------------------------------------------------------------------------------------------------------------------------------------------------------------------------------------------------------|
| Lachesis_group0__13_contigs__l.g8885  | 1569.196 | 5416.661 | -1.78751 | 0.001587 | 0.012681 | 1230 | - && P43066.1 RecName: Full=D-arabinitol 2-dehydrogenase [ribulose-forming]; Short=ARDH && PF00106:short chain dehydrogenase                                                                                                                                                                        |
| Lachesis_group0__13_contigs__l.g5514  | 155.8169 | 537.8118 | -1.78825 | 0.00386  | 0.02399  | 840  | - && - && PF09458:H-type lectin domain                                                                                                                                                                                                                                                              |
| Lachesis_group0__13_contigs__l.g7481  | 1609.748 | 5564.417 | -1.78939 | 0.000126 | 0.002118 | 2475 | - && - && PF04082:Fungal specific transcription factor domain                                                                                                                                                                                                                                       |
| Lachesis_group0__13_contigs__l.g3662  | 14.38419 | 49.67729 | -1.79012 | 0.006933 | 0.036474 | 798  | - && - && PF11807:Domain of unknown function (DUF3328)                                                                                                                                                                                                                                              |
| Lachesis_group0__13_contigs__l.g11176 | 4616.09  | 15971.71 | -1.79078 | 0.000535 | 0.005862 | 627  | - && Q0JL44.1 RecName: Full=Protein SGT1 homolog; Short=OsSGT1; AltName: Full=Suppressor of G2 allele of SKP1 homolog && PF04969:CS domain PF05002:SGS domain                                                                                                                                       |
| Lachesis_group0__13_contigs__l.g6780  | 656.1662 | 2271.081 | -1.79159 | 0.009375 | 0.045147 | 1959 | - && P30608.1 RecName: Full=Cytochrome P450 52A6; AltName: Full=Alkane-inducible P450-ALK3; AltName: Full=CYPLIIA6 && PF00067:Cytochrome P450                                                                                                                                                       |
| Lachesis_group0__13_contigs__l.g5914  | 3374.728 | 11685.59 | -1.7919  | 0.000227 | 0.003183 | 3783 | - && Q5BGR2.2 RecName: Full=Protein mesA && PF07792:Docking domain of Afi1 for Arf3 in vesicle trafficking PF00656:Caspase domain                                                                                                                                                                   |
| Lachesis_group0__13_contigs__l.g5624  | 1067.04  | 3708.105 | -1.79714 | 0.000604 | 0.006368 | 1332 | - && Q9P6P9.1 RecName: Full=[Pyruvate dehydrogenase (acetyl-transferring)] kinase, mitochondrial; Short=Pyruvate dehydrogenase kinase; Flags: Precursor && PF10436:Mitochondrial branched-chain alpha-ketoacid dehydrogenase kinase PF02518:Histidine kinase-, DNA gyrase B-, and HSP90-like ATPase |
| Lachesis_group0__13_contigs__l.g2699  | 82.39893 | 286.9797 | -1.8016  | 0.002225 | 0.016226 | 1923 | - && Q8NK92.2 RecName: Full=Aorsin; Flags: Precursor && PF00082:Subtilase                                                                                                                                                                                                                           |

|                                      |          |          |          |          |          |      |                                                                                                                                                                                                                                                                                                                                                               |
|--------------------------------------|----------|----------|----------|----------|----------|------|---------------------------------------------------------------------------------------------------------------------------------------------------------------------------------------------------------------------------------------------------------------------------------------------------------------------------------------------------------------|
|                                      |          |          |          |          |          |      | family PF09286:Pro-kumamolisin, activation domain                                                                                                                                                                                                                                                                                                             |
| Lachesis_group0__13_contigs__l.g1720 | 39.69642 | 138.8362 | -1.80571 | 0.001124 | 0.010042 | 885  | - && B8NM67.1 RecName: Full=Oxidase ustYa; AltName: Full=Ustiloxin B biosynthesis protein Ya && PF11807:Domain of unknown function (DUF3328)                                                                                                                                                                                                                  |
| Lachesis_group0__13_contigs__l.g3604 | 927.4681 | 3286.048 | -1.82501 | 0.004827 | 0.028238 | 1461 | - && P53322.1 RecName: Full=High-affinity nicotinic acid transporter; AltName: Full=Nicotinic acid permease && PF07690:Major Facilitator Superfamily                                                                                                                                                                                                          |
| Lachesis_group0__13_contigs__l.g3589 | 42.75671 | 151.2488 | -1.82516 | 0.003573 | 0.02276  | 3213 | - && A0A0D2YG01.1 RecName: Full=Non-canonical non-ribosomal peptide synthetase FUB8; AltName: Full=Fusaric acid biosynthesis protein 8 && PF07993:Male sterility protein PF00501:AMP-binding enzyme                                                                                                                                                           |
| Lachesis_group0__13_contigs__l.g4534 | 191.4885 | 679.0501 | -1.82705 | 2.98E-05 | 0.000733 | 1710 | - && P45598.1 RecName: Full=Arabinose-proton symporter; AltName: Full=Arabinose transporter && PF00083:Sugar (and other) transporter                                                                                                                                                                                                                          |
| Lachesis_group0__13_contigs__l.g5452 | 4143.429 | 14732.66 | -1.83015 | 8.21E-05 | 0.001572 | 1326 | - && - && PF03547:Membrane transport protein                                                                                                                                                                                                                                                                                                                  |
| Lachesis_group0__13_contigs__l.g993  | 59.54099 | 213.8768 | -1.84645 | 0.001286 | 0.011008 | 1593 | - && B8NHY4.1 RecName: Full=O-methylsterigmatocystin oxidoreductase; Short=OMST oxidoreductase; AltName: Full=Aflatoxin B synthase; AltName: Full=Aflatoxin biosynthesis protein Q; AltName: Full=Cytochrome P450 64 >P0CT93.1 RecName: Full=O-methylsterigmatocystin oxidoreductase; Short=OMST oxidoreductase; AltName: Full=Aflatoxin B synthase; AltName: |

|                                      |          |          |          |          |          |      |                                                                                                                                                                                                                                                                                                                                                   |
|--------------------------------------|----------|----------|----------|----------|----------|------|---------------------------------------------------------------------------------------------------------------------------------------------------------------------------------------------------------------------------------------------------------------------------------------------------------------------------------------------------|
|                                      |          |          |          |          |          |      | Full=Aflatoxin biosynthesis protein Q; AltName: Full=Cytochrome P450 64 && PF00067:Cytochrome P450                                                                                                                                                                                                                                                |
| Lachesis_group0__13_contigs__l.g2685 | 231.6845 | 833.303  | -1.84723 | 0.000119 | 0.002032 | 897  | - && Q1ZXF1.1 RecName: Full=Probable enoyl-CoA hydratase, mitochondrial; AltName: Full=Enoyl-CoA hydratase 1; AltName: Full=Short-chain enoyl-CoA hydratase; Short=SCEH; Flags: Precursor && PF00378:Enoyl-CoA hydratase/isomerase                                                                                                                |
| Lachesis_group0__13_contigs__l.g239  | 37.96665 | 136.7035 | -1.8473  | 0.000868 | 0.008363 | 2805 | - && Q9P3U4.1 RecName: Full=E3 ubiquitin-protein ligase dbl4; AltName: Full=DNA-break-localizing protein 4; AltName: Full=Histone E3 ligase 1 && PF01485:IBR domain, a half RING-finger domain PF13445:RING-type zinc-finger                                                                                                                      |
| Lachesis_group0__13_contigs__l.g7299 | 2733.998 | 9842.929 | -1.8481  | 0.000237 | 0.00327  | 1920 | - && P56859.3 RecName: Full=Phosphoadenosine phosphosulfate reductase; AltName: Full=3'-phosphoadenylylsulfate reductase; AltName: Full=PAPS reductase, thioredoxin dependent; AltName: Full=PAdoPS reductase && PF01507:Phosphoadenosine phosphosulfate reductase family PF14622:Ribonuclease-III-like PF00035:Double-stranded RNA binding motif |
| Lachesis_group0__13_contigs__l.g5617 | 82.30664 | 296.0294 | -1.8485  | 0.00061  | 0.006407 | 939  | - && P02723.1 RecName: Full=ADP,ATP carrier protein; AltName: Full=ADP/ATP translocase; AltName: Full=Adenine nucleotide translocator; Short=ANT && PF00153:Mitochondrial carrier protein                                                                                                                                                         |
| Lachesis_group0__13_contigs__l.g5278 | 1698.928 | 6124.647 | -1.85007 | 0.000257 | 0.003454 | 1635 | - && - && PF10277:Frag1/DRAM/Sfk1 family                                                                                                                                                                                                                                                                                                          |

|                                      |          |          |          |          |          |      |                                                                                                                                                                                                       |
|--------------------------------------|----------|----------|----------|----------|----------|------|-------------------------------------------------------------------------------------------------------------------------------------------------------------------------------------------------------|
| Lachesis_group0__13_contigs__l.g8800 | 124.7994 | 451.3357 | -1.85481 | 0.004491 | 0.026711 | 1242 | - && Q8NK50.1 RecName: Full=NADP-dependent mannitol dehydrogenase; Short=MtDH; AltName: Full=Mannitol 2-dehydrogenase [NADP(+)] && PF00106:short chain dehydrogenase                                  |
| Lachesis_group0__13_contigs__l.g5508 | 167.479  | 605.7852 | -1.85518 | 0.002879 | 0.019492 | 423  | - && P33207.2 RecName: Full=3-oxoacyl-[acyl-carrier-protein] reductase, chloroplastic; AltName: Full=3-ketoacyl-acyl carrier protein reductase; Flags: Precursor && PF00106:short chain dehydrogenase |
| Lachesis_group0__13_contigs__l.g4525 | 4332.66  | 15675.92 | -1.85525 | 0.000877 | 0.008412 | 3144 | - && P00365.4 RecName: Full=NAD-specific glutamate dehydrogenase; Short=NAD-GDH && PF00208:Glutamate/Leucine/Phenylalanine/Valine dehydrogenase PF05088:Bacterial NAD-glutamate dehydrogenase         |
| Lachesis_group0__13_contigs__l.g6118 | 134.8196 | 487.2507 | -1.85536 | 0.002439 | 0.017366 | 2061 | - && A1CFL2.1 RecName: Full=Dehydrogenase patE; AltName: Full=Patulin synthesis protein E; Flags: Precursor && PF05199:GMC oxidoreductase PF00732:GMC oxidoreductase                                  |
| Lachesis_group0__13_contigs__l.g1789 | 2543.464 | 9213.51  | -1.85691 | 9.20E-06 | 0.000324 | 396  | - && - && PF03330:Rare lipoprotein A (RlpA)-like double-psi beta-barrel                                                                                                                               |
| Lachesis_group0__13_contigs__l.g8747 | 167.2373 | 605.7955 | -1.85798 | 0.000143 | 0.002314 | 2403 | - && P31434.2 RecName: Full=Alpha-xylosidase && PF13802:Galactose mutarotase-like PF01055:Glycosyl hydrolases family 31                                                                               |
| Lachesis_group0__13_contigs__l.g5618 | 248.7932 | 913.5809 | -1.87683 | 0.002303 | 0.016668 | 1179 | - && P77316.1 RecName: Full=Uncharacterized zinc-type alcohol dehydrogenase-like protein YbdR && PF08240:Alcohol dehydrogenase GroES-like domain                                                      |

|                                       |          |          |          |          |          |      |                                                                                                                                                                                          |
|---------------------------------------|----------|----------|----------|----------|----------|------|------------------------------------------------------------------------------------------------------------------------------------------------------------------------------------------|
| Lachesis_group0__13_contigs__l.g3352  | 155.5561 | 571.8441 | -1.87815 | 4.78E-05 | 0.001036 | 1416 | - && A1CTI3.1 RecName: Full=Probable glucan 1,3-beta-glucosidase D; AltName: Full=Exo-1,3-beta-glucanase D && PF00150:Cellulase (glycosyl hydrolase family 5)                            |
| Lachesis_group0__13_contigs__l.g6708  | 149.6527 | 549.9739 | -1.87847 | 2.59E-05 | 0.000673 | 1128 | - && A1CFY8.2 RecName: Full=Probable D-xylulose reductase A; AltName: Full=Xylitol dehydrogenase A && PF08240:Alcohol dehydrogenase GroES-like domain PF00107:Zinc-binding dehydrogenase |
| Lachesis_group0__13_contigs__l.g2771  | 135.5901 | 498.2812 | -1.87893 | 0.002222 | 0.016226 | 1935 | - && Q8NK92.2 RecName: Full=Aorsin; Flags: Precursor && PF09286:Pro-kumamolisin, activation domain                                                                                       |
| Lachesis_group0__13_contigs__l.g11221 | 49.29165 | 181.1953 | -1.88072 | 0.001407 | 0.011654 | 1029 | - && Q8Y014.1 RecName: Full=Transaldolase && PF00923:Transaldolase                                                                                                                       |
| Lachesis_group0__13_contigs__l.g3733  | 19013.08 | 70136.46 | -1.88318 | 5.29E-05 | 0.001121 | 3861 | - && O74969.1 RecName: Full=High-affinity glucose transporter ght2; AltName: Full=Hexose transporter 2 && PF00083:Sugar (and other) transporter                                          |
| Lachesis_group0__13_contigs__l.g4969  | 60.9153  | 224.8246 | -1.88549 | 0.000572 | 0.006149 | 1077 | - && - && PF05368:NmrA-like family                                                                                                                                                       |
| Lachesis_group0__13_contigs__l.g7330  | 62.98146 | 232.9647 | -1.88852 | 5.50E-05 | 0.001155 | 1320 | - && A1DDK1.1 RecName: Full=Aspartic protease pep1; AltName: Full=Aspergillopepsin A; AltName: Full=Aspergillopepsin I; Flags: Precursor && PF00026:Eukaryotic aspartyl protease         |
| Lachesis_group0__13_contigs__l.g1568  | 35.96981 | 133.2865 | -1.89158 | 0.004141 | 0.025271 | 894  | - && - && PF08719:Domain of unknown function (DUF1768)                                                                                                                                   |
| Lachesis_group0__13_contigs__l.g483   | 32.67339 | 121.5727 | -1.89299 | 0.001429 | 0.011791 | 1689 | - && - && PF12937:F-box-like                                                                                                                                                             |



|                                       |          |          |          |          |          |      |                                                                                                                                                                                        |
|---------------------------------------|----------|----------|----------|----------|----------|------|----------------------------------------------------------------------------------------------------------------------------------------------------------------------------------------|
| Lachesis_group0__13_contigs__l.g520   | 741.41   | 2768.952 | -1.90115 | 0.000687 | 0.007031 | 957  | - && O06179.1 RecName: Full=Putative monooxygenase Rv1533 && PF03060:Nitronate monooxygenase                                                                                           |
| Lachesis_group0__13_contigs__l.g5294  | 31.5608  | 117.8237 | -1.90239 | 0.006646 | 0.035345 | 975  | - && - && PF05577:Serine carboxypeptidase S28                                                                                                                                          |
| Lachesis_group0__13_contigs__l.g10111 | 1256.738 | 4705.777 | -1.9048  | 0.00247  | 0.017509 | 3831 | - && - && PF00004:ATPase family associated with various cellular activities (AAA)                                                                                                      |
| Lachesis_group0__13_contigs__l.g4931  | 123.2609 | 461.9363 | -1.90568 | 0.000229 | 0.003201 | 834  | - && - && PF12695:Alpha/beta hydrolase family                                                                                                                                          |
| Lachesis_group0__13_contigs__l.g845   | 2472.127 | 9270.988 | -1.90698 | 0.001142 | 0.010125 | 4587 | - && - && PF08229:ER membrane protein SH3                                                                                                                                              |
| Lachesis_group0__13_contigs__l.g7326  | 27470.31 | 103090.3 | -1.90797 | 0.004377 | 0.026243 | 1152 | - && C5DGQ7.1 RecName: Full=Glucose transport transcription regulator RGT1; AltName: Full=Restores glucose transport protein 1 && PF00172:Fungal Zn(2)-Cys(6) binuclear cluster domain |
| Lachesis_group0__13_contigs__l.g6578  | 3711.361 | 13937.14 | -1.90896 | 0.000116 | 0.002001 | 3000 | - && - && PF06011:Transient receptor potential (TRP) ion channel                                                                                                                       |
| Lachesis_group0__13_contigs__l.g677   | 117.1036 | 444.3199 | -1.9248  | 0.002506 | 0.01767  | 1878 | - && P15245.3 RecName: Full=Phenol 2-monooxygenase; AltName: Full=Phenol hydroxylase && PF07976:Phenol hydroxylase, C-terminal dimerisation domain PF01494:FAD binding domain          |
| novel.1009                            | 33.17595 | 126.0126 | -1.92842 | 0.00146  | 0.011971 | 2302 | - && P15365.1 RecName: Full=Allantoate permease && PF07690:Major Facilitator Superfamily                                                                                               |
| Lachesis_group0__13_contigs__l.g5495  | 34.41778 | 131.3241 | -1.93283 | 0.00259  | 0.018043 | 903  | - && P14065.1 RecName: Full=Glycerol 2-dehydrogenase (NADP(+)); AltName: Full=Galactose-inducible crystallin-like protein 1 && PF00248:Aldo/keto reductase family                      |

|                                       |          |          |          |          |          |      |                                                                                                                                                                                                                                         |
|---------------------------------------|----------|----------|----------|----------|----------|------|-----------------------------------------------------------------------------------------------------------------------------------------------------------------------------------------------------------------------------------------|
| Lachesis_group0__13_contigs__l.g268   | 361.8112 | 1383.513 | -1.93496 | 8.85E-05 | 0.001664 | 945  | - && O74959.1 RecName: Full=Uncharacterized oxidoreductase C736.13 && PF00106:short chain dehydrogenase                                                                                                                                 |
| Lachesis_group0__13_contigs__l.g710   | 42.12905 | 161.1    | -1.93681 | 0.003106 | 0.020536 | 2427 | - && - && PF00069:Protein kinase domain                                                                                                                                                                                                 |
| Lachesis_group0__13_contigs__l.g5913  | 90.33187 | 346.4283 | -1.9389  | 0.002461 | 0.017484 | 1671 | - && Q0D076.1 RecName: Full=Probable mannosyl-oligosaccharide alpha-1,2-mannosidase 1B; AltName: Full=Class I alpha-mannosidase 1B; AltName: Full=Man(9)-alpha-mannosidase 1B; Flags: Precursor && PF01532:Glycosyl hydrolase family 47 |
| Lachesis_group0__13_contigs__l.g10730 | 85.44555 | 327.3894 | -1.93931 | 0.000443 | 0.005129 | 2748 | - && Q2U4L7.2 RecName: Full=Glutaminase A; Flags: Precursor && PF08760:Domain of unknown function (DUF1793) PF16335:Domain of unknown function (DUF4965)                                                                                |
| Lachesis_group0__13_contigs__l.g2499  | 13.28075 | 50.70783 | -1.94022 | 0.006352 | 0.034284 | 765  | - && Q9FSG7.1 RecName: Full=Thaumatococcus-like protein 1a; AltName: Full=Mdt1; AltName: Full=Pathogenesis-related protein 5a; Short=PR-5a; AltName: Allergen=Mal d 2; Flags: Precursor && PF00314:Thaumatococcus family                |
| Lachesis_group0__13_contigs__l.g9307  | 14414.07 | 55343.5  | -1.94094 | 6.35E-05 | 0.001294 | 1296 | - && O94123.1 RecName: Full=Phosphoglycerate kinase && PF00162:Phosphoglycerate kinase                                                                                                                                                  |
| Lachesis_group0__13_contigs__l.g722   | 1290.288 | 4959.946 | -1.94266 | 0.007935 | 0.040302 | 2160 | - && Q3L245.1 RecName: Full=Pyranose dehydrogenase 1; Short=PDH 1; AltName: Full=Pyranose:quinone oxidoreductase 1; Flags: Precursor && PF00732:GMC oxidoreductase PF05199:GMC oxidoreductase                                           |
| Lachesis_group0__13_contigs__l.g6980  | 1247.316 | 4797.317 | -1.94347 | 4.53E-06 | 0.000196 | 1572 | - && Q0CJ61.1 RecName: Full=Efflux pump atB; AltName: Full=Terreic acid biosynthesis cluster                                                                                                                                            |

|                                       |          |          |          |          |          |      |                                                                                                                                                                                                                      |
|---------------------------------------|----------|----------|----------|----------|----------|------|----------------------------------------------------------------------------------------------------------------------------------------------------------------------------------------------------------------------|
|                                       |          |          |          |          |          |      | protein B && PF07690:Major Facilitator Superfamily                                                                                                                                                                   |
| Lachesis_group0__13_contigs__l.g1146  | 236.4269 | 909.5683 | -1.94372 | 7.06E-06 | 0.00027  | 2244 | - && P32816.1 RecName: Full=Glycerol dehydrogenase; Short=GDH; Short=GLDH; Short=GlyDH && PF00465:Iron-containing alcohol dehydrogenase                                                                              |
| Lachesis_group0__13_contigs__l.g11192 | 81.95433 | 315.0571 | -1.94549 | 0.002848 | 0.019342 | 2703 | - && - && PF08124:Polysaccharide lyase family 8, N terminal alpha-helical domain PF02278:Polysaccharide lyase family 8, super-sandwich domain PF02884:Polysaccharide lyase family 8, C-terminal beta-sandwich domain |
| Lachesis_group0__13_contigs__l.g10680 | 3328.394 | 12877.46 | -1.95199 | 5.39E-05 | 0.001135 | 1899 | - && Q12581.1 RecName: Full=Cytochrome P450 52A5; AltName: Full=Alkane-inducible P450-ALK2-A; AltName: Full=CYP11A5 [Candida maltosa] && PF00067:Cytochrome P450                                                     |
| Lachesis_group0__13_contigs__l.g521   | 9502.178 | 36883.88 | -1.95667 | 0.005315 | 0.030185 | 783  | - && - && PF13920:Zinc finger, C3HC4 type (RING finger)                                                                                                                                                              |
| Lachesis_group0__13_contigs__l.g8408  | 669.9196 | 2601.617 | -1.95764 | 0.000999 | 0.009272 | 1881 | - && O14283.2 RecName: Full=Transcription factor prr1; AltName: Full=Pombe response regulator 1 && PF00447:HSF-type DNA-binding                                                                                      |
| Lachesis_group0__13_contigs__l.g7165  | 23.04094 | 89.4924  | -1.9621  | 0.008895 | 0.043683 | 1479 | - && - && PF07690:Major Facilitator Superfamily                                                                                                                                                                      |
| Lachesis_group0__13_contigs__l.g825   | 861.6066 | 3360.719 | -1.96368 | 5.03E-05 | 0.00107  | 2187 | - && P53933.1 RecName: Full=Phosphatidate phosphatase APP1; Short=PAP; AltName: Full=Actin patch protein 1 && PF09949:Uncharacterized conserved protein (DUF2183)                                                    |
| Lachesis_group0__13_contigs__l.g8190  | 179.6164 | 702.0642 | -1.96713 | 0.001354 | 0.011375 | 1329 | - && - && PF00652:Ricin-type beta-trefoil lectin domain                                                                                                                                                              |

|                                       |          |          |          |          |          |      |                                                                                                                                                                                                                                            |
|---------------------------------------|----------|----------|----------|----------|----------|------|--------------------------------------------------------------------------------------------------------------------------------------------------------------------------------------------------------------------------------------------|
| novel.536                             | 17.82694 | 69.64424 | -1.96961 | 0.002563 | 0.017942 | 1339 | - && Q0CJ60.1 RecName: Full=Cyclase atC; AltName: Full=Terreic acid biosynthesis cluster protein C; Flags: Precursor && PF00732:GMC oxidoreductase PF05199:GMC oxidoreductase                                                              |
| Lachesis_group0__13_contigs__l.g10091 | 319.0115 | 1251.735 | -1.97261 | 0.00034  | 0.004224 | 2415 | - && Q59KI0.1 RecName: Full=UTP--glucose-1-phosphate uridylyltransferase; AltName: Full=UDP-glucose pyrophosphorylase; Short=UDPGP; Short=UGPase && PF00106:short chain dehydrogenase PF01704:UTP--glucose-1-phosphate uridylyltransferase |
| Lachesis_group0__13_contigs__l.g3103  | 187.4344 | 736.193  | -1.97385 | 0.000167 | 0.002564 | 3453 | - && Q9Y6Z9.1 RecName: Full=Sorbose reductase sou1; AltName: Full=Sorbitol utilization protein sou1 && PF00106:short chain dehydrogenase                                                                                                   |
| Lachesis_group0__13_contigs__l.g10156 | 15.1062  | 59.32802 | -1.97448 | 0.009043 | 0.044051 | 960  | - && A7J2C6.1 RecName: Full=Acetylesterase; AltName: Full=Carbohydrate esterase family 16 protein; Flags: Precursor && PF00657:GDSL-like Lipase/Acylhydrolase                                                                              |
| Lachesis_group0__13_contigs__l.g11360 | 14558.79 | 57275.47 | -1.97603 | 1.00E-06 | 6.53E-05 | 1017 | - && A1CFL1.1 RecName: Full=Alcohol dehydrogenase patD; AltName: Full=Patulin synthesis protein D && PF08240:Alcohol dehydrogenase GroES-like domain PF00107:Zinc-binding dehydrogenase                                                    |
| Lachesis_group0__13_contigs__l.g11459 | 61.32586 | 240.8051 | -1.9763  | 0.002599 | 0.018088 | 912  | - && - && PF02602:Uroporphyrinogen-III synthase HemD                                                                                                                                                                                       |
| Lachesis_group0__13_contigs__l.g7741  | 266.1997 | 1049.119 | -1.97895 | 0.000887 | 0.008483 | 1686 | - && - && PF08241:Methyltransferase domain                                                                                                                                                                                                 |
| Lachesis_group0__13_contigs__l.g4498  | 4772.167 | 18829.75 | -1.98031 | 0.001117 | 0.010032 | 1056 | - && Q9USW3.1 RecName: Full=Probable glycosidase C21B10.07 && PF00722:Glycosyl hydrolases family 16                                                                                                                                        |

|                                       |          |          |          |          |          |      |                                                                                                                                                                                                                                                                                                                         |
|---------------------------------------|----------|----------|----------|----------|----------|------|-------------------------------------------------------------------------------------------------------------------------------------------------------------------------------------------------------------------------------------------------------------------------------------------------------------------------|
| Lachesis_group0__13_contigs__l.g5100  | 662.795  | 2617.37  | -1.9817  | 8.52E-05 | 0.001621 | 537  | - && B0DN41.1 RecName: Full=Cyanate hydratase; Short=Cyanase; AltName: Full=Cyanate hydrolase; AltName: Full=Cyanate lyase && PF02560:Cyanate lyase C-terminal domain                                                                                                                                                   |
| Lachesis_group0__13_contigs__l.g10262 | 7496.762 | 29765.9  | -1.98934 | 8.34E-05 | 0.00159  | 2103 | - && Q8VZI2.1 RecName: Full=DUF21 domain-containing protein At4g33700; AltName: Full=CBS domain-containing protein CBSDUF6 && PF01595:Domain of unknown function DUF21                                                                                                                                                  |
| Lachesis_group0__13_contigs__l.g5534  | 607.2576 | 2415.416 | -1.99215 | 1.20E-05 | 0.00039  | 1626 | - && P07921.1 RecName: Full=Lactose permease && PF00083:Sugar (and other) transporter                                                                                                                                                                                                                                   |
| Lachesis_group0__13_contigs__l.g3045  | 70.94332 | 282.9307 | -1.99745 | 0.006408 | 0.034442 | 975  | - && Q00023.1 RecName: Full=Cellulose-growth-specific protein; Flags: Precursor && PF03443:Glycosyl hydrolase family 61   PF00734:Fungal cellulose binding domain                                                                                                                                                       |
| Lachesis_group0__13_contigs__l.g4178  | 206.2931 | 824.736  | -2.00013 | 0.000525 | 0.00579  | 1650 | - && P81406.1 RecName: Full=NADP-dependent glyceraldehyde-3-phosphate dehydrogenase; AltName: Full=Glyceraldehyde-3-phosphate dehydrogenase [NADP(+)]; AltName: Full=Non-phosphorylating glyceraldehyde 3-phosphate dehydrogenase; AltName: Full=Triosephosphate dehydrogenase && PF00171:Aldehyde dehydrogenase family |
| Lachesis_group0__13_contigs__l.g4273  | 16.43372 | 65.922   | -2.00342 | 0.007887 | 0.040136 | 1374 | - && - && PF03595:Voltage-dependent anion channel                                                                                                                                                                                                                                                                       |
| Lachesis_group0__13_contigs__l.g8274  | 27.95664 | 112.6847 | -2.01379 | 0.001675 | 0.013173 | 1395 | - && Q9YI66.1 RecName: Full=Tyrosine-protein kinase receptor TYRO3; AltName: Full=Tyrosine-protein kinase DTK; Flags: Precursor && PF07714:Protein tyrosine kinase                                                                                                                                                      |

|                                      |          |          |          |          |          |      |                                                                                                                                                                                                                                                                                                                                                                                                                                                          |
|--------------------------------------|----------|----------|----------|----------|----------|------|----------------------------------------------------------------------------------------------------------------------------------------------------------------------------------------------------------------------------------------------------------------------------------------------------------------------------------------------------------------------------------------------------------------------------------------------------------|
| Lachesis_group0__13_contigs__l.g8279 | 24.84682 | 100.4192 | -2.01821 | 0.003158 | 0.020771 | 1026 | - && Q6PAD2.1 RecName: Full=Serine/threonine-protein kinase PLK4; AltName: Full=Polo-like kinase 4; Short=PLK-4; AltName: Full=Serine/threonine-protein kinase Sak && PF07714:Protein tyrosine kinase                                                                                                                                                                                                                                                    |
| Lachesis_group0__13_contigs__l.g838  | 598.883  | 2431.7   | -2.02174 | 0.000316 | 0.004001 | 1323 | - && Q01284.1 RecName: Full=Nitronate monooxygenase; AltName: Full=2-nitropropane dioxygenase; Short=2-NPD; AltName: Full=Nitroalkane oxidase; Flags: Precursor && PF03060:Nitronate monooxygenase                                                                                                                                                                                                                                                       |
| Lachesis_group0__13_contigs__l.g451  | 382.6615 | 1564.883 | -2.03209 | 2.59E-05 | 0.000673 | 1038 | - && Q9UT59.1 RecName: Full=Putative uncharacterized oxidoreductase C513.07 && PF01370:NAD dependent epimerase/dehydratase family                                                                                                                                                                                                                                                                                                                        |
| Lachesis_group0__13_contigs__l.g8991 | 106.3194 | 436.6139 | -2.03989 | 0.000206 | 0.003    | 1092 | - && Q6GBM4.1 RecName: Full=Alcohol dehydrogenase; Short=ADH >Q6GJ63.1 RecName: Full=Alcohol dehydrogenase; Short=ADH >Q8NXU1.1 RecName: Full=Alcohol dehydrogenase; Short=ADH >Q5HI63.1 RecName: Full=Alcohol dehydrogenase; Short=ADH >Q2G0G1.1 RecName: Full=Alcohol dehydrogenase; Short=ADH >Q2FJ31.1 RecName: Full=Alcohol dehydrogenase; Short=ADH >Q2YSX0.1 RecName: Full=Alcohol dehydrogenase; Short=ADH && PF00107:Zinc-binding dehydrogenase |

|                                       |          |          |          |          |          |      |                                                                                                                                                                                                                                               |
|---------------------------------------|----------|----------|----------|----------|----------|------|-----------------------------------------------------------------------------------------------------------------------------------------------------------------------------------------------------------------------------------------------|
| Lachesis_group0__13_contigs__l.g2540  | 52.08229 | 214.3842 | -2.04404 | 0.000464 | 0.005305 | 1722 | - && P59668.1 RecName: Full=Delta(12) fatty acid desaturase; AltName: Full=Delta-12 fatty acid desaturase && PF00487:Fatty acid desaturase                                                                                                    |
| Lachesis_group0__13_contigs__l.g1952  | 47.53739 | 197.0588 | -2.05004 | 0.000522 | 0.005763 | 444  | - && - && PF16850:Peptidase inhibitor I66                                                                                                                                                                                                     |
| Lachesis_group0__13_contigs__l.g7494  | 41.32524 | 171.0409 | -2.05114 | 0.007348 | 0.038127 | 1917 | - && A7MFA8.1 RecName: Full=Oxygen-dependent choline dehydrogenase; Short=CDH; Short=CHD; AltName: Full=Betaine aldehyde dehydrogenase; Short=BADH && PF00732:GMC oxidoreductase PF05199:GMC oxidoreductase                                   |
| Lachesis_group0__13_contigs__l.g6866  | 47.50446 | 197.6544 | -2.05767 | 0.000134 | 0.00222  | 1893 | - && - && PF13578:Methyltransferase domain PF01501:Glycosyl transferase family 8                                                                                                                                                              |
| Lachesis_group0__13_contigs__l.g3651  | 205.8933 | 856.716  | -2.058   | 0.000208 | 0.003011 | 1317 | - && P75791.1 RecName: Full=Uncharacterized protein YbiU && PF07350:Protein of unknown function (DUF1479)                                                                                                                                     |
| Lachesis_group0__13_contigs__l.g7087  | 388.7436 | 1619.373 | -2.05882 | 0.001072 | 0.009748 | 2643 | - && B7GFR1.1 RecName: Full=Aspartate--tRNA(Asp/Asn) ligase; AltName: Full=Aspartyl-tRNA synthetase; Short=AspRS; AltName: Full=Non-discriminating aspartyl-tRNA synthetase; Short=ND-AspRS && PF00152:tRNA synthetases class II (D, K and N) |
| Lachesis_group0__13_contigs__l.g11461 | 204.74   | 855.3072 | -2.06377 | 0.000115 | 0.001998 | 2325 | - && Q9C168.2 RecName: Full=Catalase-1 && PF01965:DJ-1/PfpI family PF06628:Catalase-related immune-responsive PF00199:Catalase                                                                                                                |
| Lachesis_group0__13_contigs__l.g9060  | 307.1044 | 1284.556 | -2.06497 | 1.43E-05 | 0.000443 | 1677 | - && P55809.1 RecName: Full=Succinyl-CoA:3-ketoacid coenzyme A transferase 1, mitochondrial; AltName: Full=3-oxoacid CoA-transferase 1; AltName: Full=Somatic-type succinyl-CoA:3-                                                            |

|                                       |          |          |          |          |          |      |                                                                                                                                                                                                                                                                      |
|---------------------------------------|----------|----------|----------|----------|----------|------|----------------------------------------------------------------------------------------------------------------------------------------------------------------------------------------------------------------------------------------------------------------------|
|                                       |          |          |          |          |          |      | oxoacid CoA-transferase; Short=SCOT-s; Flags: Precursor && PF01144:Coenzyme A transferase                                                                                                                                                                            |
| Lachesis_group0__13_contigs__l.g1062  | 2574.037 | 10780.5  | -2.06636 | 9.22E-06 | 0.000324 | 4593 | - && P55201.2 RecName: Full=Peregrin; AltName: Full=Bromodomain and PHD finger-containing protein 1; AltName: Full=Protein Br140 && PF10513:Enhancer of polycomb-like PF13831:PHD-finger PF00439:Bromodomain PF13832:PHD-zinc-finger like domain PF00855:PWWP domain |
| Lachesis_group0__13_contigs__l.g5591  | 76.24353 | 319.8883 | -2.0694  | 0.000101 | 0.001813 | 1479 | - && Q0QWS4.1 RecName: Full=L-galactonate dehydratase && PF13378:Enolase C-terminal domain-like PF02746:Mandelate racemase / muconate lactonizing enzyme, N-terminal domain                                                                                          |
| Lachesis_group0__13_contigs__l.g3172  | 19.47783 | 81.58993 | -2.07138 | 0.008991 | 0.043915 | 2478 | - && - && PF02816:Alpha-kinase family                                                                                                                                                                                                                                |
| Lachesis_group0__13_contigs__l.g9495  | 2409.824 | 10222.19 | -2.08476 | 4.75E-06 | 0.000204 | 738  | - && - && PF00646:F-box domain                                                                                                                                                                                                                                       |
| Lachesis_group0__13_contigs__l.g6790  | 12617.75 | 53542.2  | -2.08523 | 0.003819 | 0.023794 | 840  | - && - && PF11563:Protoglobin                                                                                                                                                                                                                                        |
| Lachesis_group0__13_contigs__l.g5392  | 7629.078 | 32447.98 | -2.08856 | 1.69E-06 | 9.49E-05 | 1080 | - && P07754.1 RecName: Full=Alcohol dehydrogenase 3; AltName: Full=Alcohol dehydrogenase III; Short=ADH III && PF08240:Alcohol dehydrogenase GroES-like domain PF00107:Zinc-binding dehydrogenase                                                                    |
| Lachesis_group0__13_contigs__l.g10346 | 1921.167 | 8180.664 | -2.0903  | 2.61E-05 | 0.000674 | 1302 | - && A8N4R7.1 RecName: Full=1,2-dihydroxy-3-keto-5-methylthiopentene dioxygenase 1; AltName: Full=Acireductone dioxygenase (Fe(2+)-requiring) 1; Short=ARD 1; Short=Fe-ARD 1 && PF03079:ARD/ARD' family                                                              |
| Lachesis_group0__13_contigs__l.g9091  | 552.7375 | 2363.67  | -2.09645 | 3.30E-05 | 0.000789 | 1698 | - && P53388.1 RecName: Full=Dicarboxylic amino acid permease && PF00324:Amino acid permease                                                                                                                                                                          |



|                                       |          |          |          |          |          |      |                                                                                                                                                                                                                                                                                                                                             |
|---------------------------------------|----------|----------|----------|----------|----------|------|---------------------------------------------------------------------------------------------------------------------------------------------------------------------------------------------------------------------------------------------------------------------------------------------------------------------------------------------|
| Lachesis_group0__13_contigs__l.g4906  | 14659.49 | 62717.78 | -2.09705 | 2.21E-05 | 0.000601 | 2271 | - && Q9P326.1 RecName: Full=Transcriptional regulatory protein pro1; AltName: Full=Arrested development protein 1 && PF11951:Fungal specific transcription factor domain                                                                                                                                                                    |
| Lachesis_group0__13_contigs__l.g836   | 114.9621 | 491.7835 | -2.09866 | 0.001128 | 0.010065 | 717  | - && - && PF03060:Nitronate monooxygenase                                                                                                                                                                                                                                                                                                   |
| Lachesis_group0__13_contigs__l.g10551 | 49.30142 | 211.4597 | -2.1026  | 0.002162 | 0.015937 | 1887 | - && Q9FVQ0.1 RecName: Full=Probable indole-3-pyruvate monooxygenase YUCCA10; AltName: Full=Flavin-containing monooxygenase YUCCA10 && PF13738:Pyridine nucleotide-disulphide oxidoreductase                                                                                                                                                |
| Lachesis_group0__13_contigs__l.g6589  | 37.88435 | 162.5522 | -2.10579 | 0.00059  | 0.006271 | 1104 | - && O13629.1 RecName: Full=Putative lipoate-protein ligase A && -                                                                                                                                                                                                                                                                          |
| Lachesis_group0__13_contigs__l.g5019  | 202.4207 | 871.8454 | -2.10771 | 2.62E-05 | 0.000675 | 1689 | - && Q47944.1 RecName: Full=L-sorbose 1-dehydrogenase; Short=SDH && PF00732:GMC oxidoreductase PF05199:GMC oxidoreductase                                                                                                                                                                                                                   |
| Lachesis_group0__13_contigs__l.g6641  | 980.9361 | 4263.88  | -2.1201  | 8.32E-05 | 0.001588 | 2220 | - && Q95M17.1 RecName: Full=Acidic mammalian chitinase; Short=AMCase; AltName: Full=Chitin-binding protein b04; Short=CBPb04; Flags: Precursor && PF00704:Glycosyl hydrolases family 18                                                                                                                                                     |
| Lachesis_group0__13_contigs__l.g3393  | 762.3102 | 3315.943 | -2.12078 | 9.45E-05 | 0.001742 | 2451 | - && Q0CEF3.1 RecName: Full=Probable beta-glucosidase L; AltName: Full=Beta-D-glucoside glucohydrolase L; AltName: Full=Cellobiase L; AltName: Full=Gentiobiase L; Flags: Precursor && PF01915:Glycosyl hydrolase family 3 C-terminal domain PF14310:Fibronectin type III-like domain PF00933:Glycosyl hydrolase family 3 N terminal domain |

|                                       |          |          |          |          |          |      |                                                                                                                                                                                                                                     |
|---------------------------------------|----------|----------|----------|----------|----------|------|-------------------------------------------------------------------------------------------------------------------------------------------------------------------------------------------------------------------------------------|
| Lachesis_group0__13_contigs__l.g7707  | 4301.528 | 18739.47 | -2.12317 | 0.00449  | 0.026711 | 2277 | - && P04821.1 RecName: Full=Cell division control protein 25 && PF00617:RasGEF domain PF00618:RasGEF N-terminal motif PF00018:SH3 domain                                                                                            |
| Lachesis_group0__13_contigs__l.g6318  | 159.6216 | 695.8524 | -2.12422 | 4.86E-05 | 0.001045 | 645  | - && B0DK57.1 RecName: Full=Solute carrier family 25 member 38 homolog && PF00153:Mitochondrial carrier protein                                                                                                                     |
| Lachesis_group0__13_contigs__l.g4962  | 20.15691 | 88.12168 | -2.12991 | 0.003527 | 0.022533 | 909  | - && Q9HEZ1.1 RecName: Full=Endo-1,4-beta-xylanase A; Short=Xylanase A; AltName: Full=1,4-beta-D-xylan xylanohydrolase A; Flags: Precursor && PF00331:Glycosyl hydrolase family 10                                                  |
| Lachesis_group0__13_contigs__l.g4667  | 1193.295 | 5238.372 | -2.13423 | 9.44E-05 | 0.001742 | 534  | - && O14368.1 RecName: Full=Heat shock protein 16; AltName: Full=16 kDa heat shock protein && PF00011:Hsp20/alpha crystallin family                                                                                                 |
| Lachesis_group0__13_contigs__l.g10337 | 126.7511 | 557.7497 | -2.13733 | 2.71E-06 | 0.000133 | 555  | - && Q9UTI7.1 RecName: Full=Probable thymidylate synthase; Short=TS; Short=TSase && PF02441:Flavoprotein                                                                                                                            |
| Lachesis_group0__13_contigs__l.g2888  | 370.1243 | 1630.411 | -2.13925 | 2.17E-06 | 0.000112 | 3771 | - && P0CU32.1 RecName: Full=FAD-linked oxidoreductase CHGG_01242-2; AltName: Full=Chaetoglobosin biosynthesis protein CHGG_01242-2 && PF08031:Berberine and berberine like PF01565:FAD binding domain PF00069:Protein kinase domain |
| Lachesis_group0__13_contigs__l.g3240  | 1505.968 | 6640.654 | -2.14069 | 9.13E-05 | 0.001706 | 8106 | - && Q3S2U6.1 RecName: Full=Lovastatin diketide synthase mokB; AltName: Full=Monacolin K biosynthesis protein B && PF00975:Thioesterase domain PF02801:Beta-ketoacyl synthase, C-terminal domain PF00698:Acyl transferase           |

|                                       |          |          |          |          |          |      |                                                                                                                                                                                                                                                                                                                                                                         |
|---------------------------------------|----------|----------|----------|----------|----------|------|-------------------------------------------------------------------------------------------------------------------------------------------------------------------------------------------------------------------------------------------------------------------------------------------------------------------------------------------------------------------------|
|                                       |          |          |          |          |          |      | domain PF14765:Polyketide synthase<br>dehydratase PF00550:Phosphopantetheine<br>attachment site PF13489:Methyltransferase<br>domain PF08659:KR domain PF00109:Beta-<br>ketoacyl synthase, N-terminal domain                                                                                                                                                             |
| Lachesis_group0__13_contigs__l.g11175 | 626.4884 | 2767.64  | -2.14354 | 2.71E-06 | 0.000133 | 1080 | - && - && PF13417:Glutathione S-transferase, N-<br>terminal domain                                                                                                                                                                                                                                                                                                      |
| Lachesis_group0__13_contigs__l.g5507  | 537.7125 | 2380.27  | -2.14641 | 0.000226 | 0.003183 | 708  | - && P37769.2 RecName: Full=2-dehydro-3-deoxy-<br>D-gluconate 5-dehydrogenase; AltName: Full=2-<br>deoxy-D-gluconate 3-dehydrogenase; AltName:<br>Full=2-keto-3-deoxygluconate 5-dehydrogenase;<br>AltName: Full=2-keto-3-deoxygluconate<br>oxidoreductase; Short=KDG oxidoreductase;<br>AltName: Full=20-ketosteroid reductase &&<br>PF00106:short chain dehydrogenase |
| Lachesis_group0__13_contigs__l.g305   | 7474.663 | 33248.01 | -2.15321 | 1.07E-06 | 6.81E-05 | 1650 | - && Q3MIF4.1 RecName: Full=Xylulose kinase;<br>Short=Xylulokinase && PF00370:FGGY family of<br>carbohydrate kinases, N-terminal<br>domain PF02782:FGGY family of carbohydrate<br>kinases, C-terminal domain                                                                                                                                                            |
| Lachesis_group0__13_contigs__l.g1014  | 134.1753 | 596.5193 | -2.15358 | 1.69E-05 | 0.000506 | 1542 | - && Q9US44.1 RecName: Full=Uncharacterized<br>transporter C1002.16c && PF07690:Major<br>Facilitator Superfamily                                                                                                                                                                                                                                                        |
| Lachesis_group0__13_contigs__l.g4886  | 516.4569 | 2305.876 | -2.15872 | 1.48E-06 | 8.53E-05 | 1851 | - && O23461.1 RecName: Full=L-arabinokinase;<br>Short=AtISA1 && PF13528:Glycosyl transferase<br>family 1                                                                                                                                                                                                                                                                |
| Lachesis_group0__13_contigs__l.g2503  | 63.99089 | 286.0462 | -2.16106 | 5.82E-05 | 0.001204 | 969  | - && P84675.2 RecName: Full=Putative fungistatic<br>metabolite && PF01822:WSC domain                                                                                                                                                                                                                                                                                    |

|                                       |          |          |          |          |          |      |                                                                                                                                                                                                                                                                                     |
|---------------------------------------|----------|----------|----------|----------|----------|------|-------------------------------------------------------------------------------------------------------------------------------------------------------------------------------------------------------------------------------------------------------------------------------------|
| Lachesis_group0__13_contigs__l.g2714  | 329.1786 | 1472.975 | -2.16177 | 4.05E-05 | 0.000929 | 3603 | - && Q9USG8.1 RecName: Full=Meiotically up-regulated gene 190 protein && PF00168:C2 domain                                                                                                                                                                                          |
| Lachesis_group0__13_contigs__l.g7994  | 54.81834 | 244.9386 | -2.1626  | 0.000117 | 0.002014 | 708  | - && P77460.2 PUTATIVE PSEUDOGENE: RecName: Full=Putative uncharacterized protein YbcY && PF08241:Methyltransferase domain                                                                                                                                                          |
| Lachesis_group0__13_contigs__l.g2907  | 130.2684 | 583.4242 | -2.16332 | 8.81E-05 | 0.001662 | 1653 | - && - && PF00011:Hsp20/alpha crystallin family                                                                                                                                                                                                                                     |
| Lachesis_group0__13_contigs__l.g11178 | 1025.571 | 4594.898 | -2.16377 | 0.000331 | 0.00415  | 936  | - && O13780.1 RecName: Full=Uncharacterized protein C17G6.02c && PF04479:RTA1 like protein                                                                                                                                                                                          |
| Lachesis_group0__13_contigs__l.g9821  | 1081.798 | 4852.402 | -2.16535 | 1.29E-07 | 1.53E-05 | 4662 | - && - && PF00069:Protein kinase domain                                                                                                                                                                                                                                             |
| Lachesis_group0__13_contigs__l.g7337  | 10.48371 | 47.48223 | -2.17724 | 0.002522 | 0.01774  | 1815 | - && - && PF00076:RNA recognition motif. (a.k.a. RRM, RBD, or RNP domain)                                                                                                                                                                                                           |
| Lachesis_group0__13_contigs__l.g6432  | 98.31608 | 444.6304 | -2.17838 | 1.72E-06 | 9.57E-05 | 621  | - && - && PF00076:RNA recognition motif. (a.k.a. RRM, RBD, or RNP domain)                                                                                                                                                                                                           |
| Lachesis_group0__13_contigs__l.g3645  | 1859.875 | 8445.992 | -2.18318 | 0.000149 | 0.00238  | 423  | - && - && PF14200:Ricin-type beta-trefoil lectin domain-like                                                                                                                                                                                                                        |
| Lachesis_group0__13_contigs__l.g6719  | 60.36739 | 273.5793 | -2.18344 | 0.002139 | 0.015815 | 1449 | - && A1CFY8.2 RecName: Full=Probable D-xylulose reductase A; AltName: Full=Xylitol dehydrogenase A && PF00107:Zinc-binding dehydrogenase PF08240:Alcohol dehydrogenase GroES-like domain                                                                                            |
| Lachesis_group0__13_contigs__l.g4617  | 24.88362 | 113.4431 | -2.18452 | 0.001607 | 0.012787 | 624  | - && - && PF01822:WSC domain                                                                                                                                                                                                                                                        |
| Lachesis_group0__13_contigs__l.g11168 | 46.95781 | 213.2653 | -2.18591 | 0.000163 | 0.002525 | 1026 | - && Q8ZTE1.1 RecName: Full=Ketol-acid reductoisomerase (NADP(+)); Short=KARI; AltName: Full=Acetohydroxy-acid isomeroeductase; Short=AHIR; AltName: Full=Alpha-keto-beta-hydroxylacyl reductoisomerase; AltName: Full=Ketol-acid reductoisomerase type 1; AltName: Full=Ketol-acid |

|                                      |          |          |          |          |          |      |                                                                                                                                                                                                                                                                                                                                           |
|--------------------------------------|----------|----------|----------|----------|----------|------|-------------------------------------------------------------------------------------------------------------------------------------------------------------------------------------------------------------------------------------------------------------------------------------------------------------------------------------------|
|                                      |          |          |          |          |          |      | reductoisomerase type I &&<br>PF07991:Acetohydroxy acid isomeroeductase,<br>NADPH-binding domain PF01450:Acetohydroxy<br>acid isomeroeductase, catalytic domain                                                                                                                                                                           |
| Lachesis_group0__13_contigs__l.g531  | 26.65806 | 121.5215 | -2.1909  | 0.001298 | 0.011073 | 2076 | - && - && PF12937:F-box-like                                                                                                                                                                                                                                                                                                              |
| Lachesis_group0__13_contigs__l.g2264 | 380.683  | 1737.818 | -2.19096 | 5.38E-05 | 0.001135 | 2058 | - && E9R876.1 RecName: Full=MFS gliotoxin efflux<br>transporter gliA; AltName: Full=Gliotoxin<br>biosynthesis protein A && PF07690:Major<br>Facilitator Superfamily                                                                                                                                                                       |
| Lachesis_group0__13_contigs__l.g317  | 94.29011 | 430.5406 | -2.19136 | 4.83E-06 | 0.000207 | 1626 | - && - && PF00172:Fungal Zn(2)-Cys(6) binuclear<br>cluster domain                                                                                                                                                                                                                                                                         |
| Lachesis_group0__13_contigs__l.g6078 | 40.71414 | 185.9064 | -2.19394 | 0.002544 | 0.017853 | 1692 | - && G3Y416.1 RecName: Full=Cytochrome P450<br>monooxygenase yanC; AltName: Full=Yanuthone<br>D synthesis protein C; Flags: Precursor &&<br>PF00067:Cytochrome P450                                                                                                                                                                       |
| Lachesis_group0__13_contigs__l.g8031 | 614.4758 | 2833.244 | -2.20498 | 6.48E-08 | 9.64E-06 | 2988 | - && Q06681.1 RecName: Full=Membrane-<br>anchored lipid-binding protein YSP2; AltName:<br>Full=Lipid transfer at contact site protein 4;<br>AltName: Full=Lipid transfer protein anchored at<br>membrane contact sites 3; AltName: Full=Yeast<br>suicide protein 2 && PF16016:Domain of unknown<br>function (DUF4782) PF02893:GRAM domain |
| Lachesis_group0__13_contigs__l.g1318 | 2383.072 | 11007.54 | -2.20765 | 0.000104 | 0.001864 | 1995 | - && A2QEQ6.1 RecName: Full=Beta-<br>glucuronidase; Short=GlcAase; AltName:<br>Full=Beta-D-glucuronoside glucuronosohydrolase;<br>Flags: Precursor && PF16862:Glycosyl hydrolase<br>family 79 C-terminal beta domain                                                                                                                      |

|                                       |          |          |          |          |          |      |                                                                                                                                                                                                                                                                                                                                                                                     |
|---------------------------------------|----------|----------|----------|----------|----------|------|-------------------------------------------------------------------------------------------------------------------------------------------------------------------------------------------------------------------------------------------------------------------------------------------------------------------------------------------------------------------------------------|
| Lachesis_group0__13_contigs__l.g1268  | 220.8968 | 1024.263 | -2.21361 | 0.001656 | 0.013082 | 960  | - && O74959.1 RecName: Full=Uncharacterized oxidoreductase C736.13 && PF00106:short chain dehydrogenase                                                                                                                                                                                                                                                                             |
| Lachesis_group0__13_contigs__l.g8548  | 98.5007  | 456.9991 | -2.21611 | 0.000307 | 0.003923 | 2457 | - && D4ATR3.1 RecName: Full=Uncharacterized secreted glycosidase ARB_07629; Flags: Precursor && PF07971:Glycosyl hydrolase family 92                                                                                                                                                                                                                                                |
| Lachesis_group0__13_contigs__l.g11056 | 88.73756 | 412.5106 | -2.21804 | 3.62E-05 | 0.000843 | 1233 | - && Q4WAZ6.1 RecName: Full=Multifunctional cytochrome P450 monooxygenase af510; AltName: Full=Fumagillin bioynthesis cluster P450 monooxygenase; Short=Fma-P450 && PF00067:Cytochrome P450                                                                                                                                                                                         |
| Lachesis_group0__13_contigs__l.g11362 | 89.08577 | 414.6468 | -2.2191  | 0.00059  | 0.006271 | 2502 | - && Q0CEF3.1 RecName: Full=Probable beta-glucosidase L; AltName: Full=Beta-D-glucoside glucohydrolase L; AltName: Full=Cellobiase L; AltName: Full=Gentiobiase L; Flags: Precursor && PF01915:Glycosyl hydrolase family 3 C-terminal domain PF14310:Fibronectin type III-like domain PF00734:Fungal cellulose binding domain PF00933:Glycosyl hydrolase family 3 N terminal domain |
| Lachesis_group0__13_contigs__l.g2810  | 21.75702 | 101.515  | -2.22557 | 0.001833 | 0.014195 | 882  | - && P24665.1 RecName: Full=Aspergillopepsin-2; AltName: Full=Acid protease A; AltName: Full=Aspergillopepsin II; AltName: Full=Proctase A; Contains: RecName: Full=Aspergillopepsin-2 light chain; AltName: Full=Aspergillopepsin II light chain; Contains: RecName: Full=Aspergillopepsin-2 heavy chain; AltName: Full=Aspergillopepsin II                                        |

|                                      |          |          |          |          |          |      |                                                                                                                                                                                                                                                                                       |
|--------------------------------------|----------|----------|----------|----------|----------|------|---------------------------------------------------------------------------------------------------------------------------------------------------------------------------------------------------------------------------------------------------------------------------------------|
|                                      |          |          |          |          |          |      | heavy chain; Flags: Precursor && PF01828:Peptidase A4 family                                                                                                                                                                                                                          |
| Lachesis_group0__13_contigs__l.g1173 | 325.7532 | 1534.685 | -2.23653 | 0.000126 | 0.002118 | 1239 | - && O43050.1 RecName: Full=Sterol-4-alpha-carboxylate 3-dehydrogenase, decarboxylating && PF01073:3-beta hydroxysteroid dehydrogenase/isomerase family                                                                                                                               |
| Lachesis_group0__13_contigs__l.g1947 | 16.22388 | 76.16291 | -2.23894 | 0.007856 | 0.040062 | 1215 | - && A6TBU6.1 RecName: Full=2-keto-3-deoxy-L-rhamnonate aldolase; Short=KDR aldolase; AltName: Full=2-dehydro-3-deoxyrhamnonate aldolase && PF03328:HpcH/HpaI aldolase/citrate lyase family                                                                                           |
| Lachesis_group0__13_contigs__l.g3872 | 30.42588 | 143.818  | -2.24338 | 2.40E-05 | 0.000636 | 2193 | - && Q54PX0.1 RecName: Full=Probable serine/threonine-protein kinase DDB_G0284251 && PF07714:Protein tyrosine kinase                                                                                                                                                                  |
| Lachesis_group0__13_contigs__l.g600  | 16896.89 | 80175.69 | -2.24642 | 0.000771 | 0.007639 | 2517 | - && O14283.2 RecName: Full=Transcription factor prr1; AltName: Full=Pombe response regulator 1 && PF00447:HSF-type DNA-binding PF00072:Response regulator receiver domain                                                                                                            |
| Lachesis_group0__13_contigs__l.g275  | 126.6653 | 602.4719 | -2.24971 | 0.000289 | 0.003783 | 2625 | - && - && PF17107:N-terminal domain on NACHT_NTPase and P-loop NTPases                                                                                                                                                                                                                |
| Lachesis_group0__13_contigs__l.g5372 | 6.517702 | 31.08338 | -2.25269 | 0.009137 | 0.044356 | 1296 | - && B8NHY4.1 RecName: Full=O-methylsterigmatocystin oxidoreductase; Short=OMST oxidoreductase; AltName: Full=Aflatoxin B synthase; AltName: Full=Aflatoxin biosynthesis protein Q; AltName: Full=Cytochrome P450 6A >P0CT93.1 RecName: Full=O-methylsterigmatocystin oxidoreductase; |

|                                       |          |          |          |          |          |      |                                                                                                                                                                                              |
|---------------------------------------|----------|----------|----------|----------|----------|------|----------------------------------------------------------------------------------------------------------------------------------------------------------------------------------------------|
|                                       |          |          |          |          |          |      | Short=OMST oxidoreductase; AltName: Full=Aflatoxin B synthase; AltName: Full=Aflatoxin biosynthesis protein Q; AltName: Full=Cytochrome P450 64 && PF00067:Cytochrome P450                   |
| Lachesis_group0__13_contigs__l.g10514 | 64.37297 | 306.4995 | -2.25301 | 1.17E-06 | 7.27E-05 | 1143 | - && Q9HTE3.1 RecName: Full=Glutathione-independent formaldehyde dehydrogenase; Short=FALDH; Short=FDH && PF08240:Alcohol dehydrogenase GroES-like domain PF00107:Zinc-binding dehydrogenase |
| Lachesis_group0__13_contigs__l.g808   | 72.12488 | 346.1207 | -2.26429 | 0.000182 | 0.002703 | 1584 | - && - && PF12937:F-box-like                                                                                                                                                                 |
| Lachesis_group0__13_contigs__l.g5099  | 52.10272 | 250.4409 | -2.26721 | 6.45E-05 | 0.001306 | 1377 | - && P75791.1 RecName: Full=Uncharacterized protein YbiU && PF07350:Protein of unknown function (DUF1479)                                                                                    |
| Lachesis_group0__13_contigs__l.g4295  | 80.48439 | 387.6046 | -2.26971 | 3.16E-05 | 0.000764 | 1776 | - && B2SH83.1 RecName: Full=Dihydroxy-acid dehydratase; Short=DAD && PF00920:Dehydratase family                                                                                              |
| Lachesis_group0__13_contigs__l.g11148 | 110.2416 | 532.7614 | -2.27294 | 6.44E-06 | 0.000252 | 882  | - && Q6P8M1.1 RecName: Full=Putative deoxyribonuclease TATDN1 && PF01026:TatD related DNase                                                                                                  |
| Lachesis_group0__13_contigs__l.g3789  | 1014.434 | 4910.915 | -2.27533 | 0.000222 | 0.003164 | 3030 | - && - && PF02265:S1/P1 Nuclease                                                                                                                                                             |
| Lachesis_group0__13_contigs__l.g1724  | 2614.048 | 12682.18 | -2.27848 | 0.001683 | 0.013221 | 1755 | - && - && PF02179:BAG domain                                                                                                                                                                 |
| Lachesis_group0__13_contigs__l.g5375  | 35.42042 | 171.9027 | -2.28236 | 0.005507 | 0.030989 | 1350 | - && G3Y416.1 RecName: Full=Cytochrome P450 monooxygenase yanC; AltName: Full=Yanuthone D synthesis protein C; Flags: Precursor && PF00067:Cytochrome P450                                   |



|                                       |          |          |          |          |          |      |                                                                                                                                                                                                                            |
|---------------------------------------|----------|----------|----------|----------|----------|------|----------------------------------------------------------------------------------------------------------------------------------------------------------------------------------------------------------------------------|
| Lachesis_group0__13_contigs__l.g8710  | 719.5909 | 3500.695 | -2.28247 | 1.96E-05 | 0.000555 | 1542 | - && Q800A0.1 RecName: Full=Cathepsin E; Flags: Precursor && PF00026:Eukaryotic aspartyl protease                                                                                                                          |
| Lachesis_group0__13_contigs__l.g10566 | 28.43887 | 138.8325 | -2.28825 | 0.004805 | 0.028136 | 798  | - && - && PF13417:Glutathione S-transferase, N-terminal domain                                                                                                                                                             |
| Lachesis_group0__13_contigs__l.g7816  | 14.61933 | 71.20794 | -2.29174 | 0.001062 | 0.009691 | 1404 | - && - && PF09810:Exonuclease V - a 5' deoxyribonuclease                                                                                                                                                                   |
| Lachesis_group0__13_contigs__l.g446   | 96.30514 | 473.2794 | -2.29741 | 0.000458 | 0.005272 | 3243 | - && A0A0D2YG01.1 RecName: Full=Non-canonical non-ribosomal peptide synthetase FUB8; AltName: Full=Fusaric acid biosynthesis protein 8 && PF07993:Male sterility protein PF00501:AMP-binding enzyme                        |
| Lachesis_group0__13_contigs__l.g1788  | 297.3684 | 1478.636 | -2.31449 | 1.14E-05 | 0.000373 | 399  | - && - && PF03330:Rare lipoprotein A (RlpA)-like double-psi beta-barrel                                                                                                                                                    |
| Lachesis_group0__13_contigs__l.g11460 | 301.4491 | 1500.852 | -2.31638 | 2.97E-06 | 0.000143 | 651  | - && - && PF00385:Chromo (CHRromatin Organisation MOfifier) domain                                                                                                                                                         |
| Lachesis_group0__13_contigs__l.g4968  | 16.90702 | 84.47214 | -2.32336 | 0.002274 | 0.01651  | 597  | - && - && PF05368:NmrA-like family                                                                                                                                                                                         |
| Lachesis_group0__13_contigs__l.g62    | 22.42076 | 113.2615 | -2.34344 | 0.000908 | 0.008631 | 954  | - && B7SIW2.1 RecName: Full=Endo-1,4-beta-xylanase C; Short=Xylanase C; AltName: Full=1,4-beta-D-xylan xylanohydrolase C; Flags: Precursor && PF00331:Glycosyl hydrolase family 10 PF00734:Fungal cellulose binding domain |
| Lachesis_group0__13_contigs__l.g4937  | 12.55043 | 63.42151 | -2.3435  | 0.010319 | 0.048314 | 417  | - && - && PF00172:Fungal Zn(2)-Cys(6) binuclear cluster domain                                                                                                                                                             |
| Lachesis_group0__13_contigs__l.g11029 | 398.3199 | 2033.957 | -2.35204 | 0.002375 | 0.017076 | 1695 | - && - && PF00501:AMP-binding enzyme                                                                                                                                                                                       |
| Lachesis_group0__13_contigs__l.g7745  | 298.8893 | 1528.427 | -2.35462 | 2.09E-05 | 0.00058  | 3006 | - && - && PF12937:F-box-like                                                                                                                                                                                               |
| Lachesis_group0__13_contigs__l.g11055 | 52.13098 | 266.6215 | -2.3574  | 3.88E-05 | 0.0009   | 1554 | - && Q4WAZ6.1 RecName: Full=Multifunctional cytochrome P450 monooxygenase af510; AltName:                                                                                                                                  |

|                                       |          |          |          |          |          |      |                                                                                                                                                                                                                                                                                                                                                      |
|---------------------------------------|----------|----------|----------|----------|----------|------|------------------------------------------------------------------------------------------------------------------------------------------------------------------------------------------------------------------------------------------------------------------------------------------------------------------------------------------------------|
|                                       |          |          |          |          |          |      | Full=Fumagillin bioynthesis cluster P450 monooxygenase; Short=Fma-P450 && PF00067:Cytochrome P450                                                                                                                                                                                                                                                    |
| Lachesis_group0__13_contigs__l.g7972  | 48.16269 | 246.8213 | -2.35889 | 4.31E-06 | 0.00019  | 963  | - && P18631.1 RecName: Full=Low-affinity glucose transporter; AltName: Full=Hexose transporter 1 && PF00083:Sugar (and other) transporter                                                                                                                                                                                                            |
| Lachesis_group0__13_contigs__l.g10038 | 13.03966 | 67.05729 | -2.36379 | 0.000287 | 0.003765 | 2580 | - && - && PF00069:Protein kinase domain                                                                                                                                                                                                                                                                                                              |
| Lachesis_group0__13_contigs__l.g10128 | 15.61008 | 80.82645 | -2.37147 | 0.000679 | 0.006966 | 2388 | - && Q551H4.1 RecName: Full=Serine/threonine-protein kinase fray2; AltName: Full=STE20-like kinase fray2 && PF00069:Protein kinase domain                                                                                                                                                                                                            |
| Lachesis_group0__13_contigs__l.g8792  | 230.217  | 1193.076 | -2.37381 | 0.000125 | 0.002118 | 1074 | - && Q84V25.1 RecName: Full=2-methylene-furan-3-one reductase; AltName: Full=Enone oxidoreductase; Short=FaEO; AltName: Full=Quinone oxidoreductase; Short=FaQR && PF13602:Zinc-binding dehydrogenase                                                                                                                                                |
| Lachesis_group0__13_contigs__l.g3062  | 4031.651 | 20956.38 | -2.37797 | 1.22E-05 | 0.000393 | 306  | - && - && PF05254:Uncharacterised protein family (UPF0203)                                                                                                                                                                                                                                                                                           |
| Lachesis_group0__13_contigs__l.g4512  | 207.6648 | 1082.447 | -2.38302 | 1.20E-05 | 0.00039  | 1791 | - && Q9SYK0.1 RecName: Full=Beta-hexosaminidase 2; AltName: Full=Beta-GlcNAcase 2; AltName: Full=Beta-N-acetylhexosaminidase 2; AltName: Full=Beta-hexosaminidase 3; Short=AtHEX3; AltName: Full=N-acetyl-beta-glucosaminidase 2; Flags: Precursor && PF00728:Glycosyl hydrolase family 20, catalytic domain PF14845:beta-acetyl hexosaminidase like |
| Lachesis_group0__13_contigs__l.g540   | 1066.824 | 5611.574 | -2.39514 | 0.00111  | 0.009997 | 1020 | - && - && PF00651:BTB/POZ domain                                                                                                                                                                                                                                                                                                                     |
| Lachesis_group0__13_contigs__l.g7290  | 53.1343  | 281.2161 | -2.4044  | 4.13E-05 | 0.000941 | 1614 | - && P51687.2 RecName: Full=Sulfite oxidase, mitochondrial; Flags: Precursor && PF03404:Mo-co                                                                                                                                                                                                                                                        |

|                                       |          |          |          |          |          |      |                                                                                                                                                                                                                                                                                                                                                                                                                                                                  |                            |
|---------------------------------------|----------|----------|----------|----------|----------|------|------------------------------------------------------------------------------------------------------------------------------------------------------------------------------------------------------------------------------------------------------------------------------------------------------------------------------------------------------------------------------------------------------------------------------------------------------------------|----------------------------|
|                                       |          |          |          |          |          |      | oxidoreductase domain PF00174:Oxidoreductase binding domain                                                                                                                                                                                                                                                                                                                                                                                                      | dimerisation molybdopterin |
| Lachesis_group0__13_contigs__l.g4961  | 12.72818 | 67.94748 | -2.42691 | 0.003094 | 0.020482 | 1107 | - && Q9HEZ1.1 RecName: Full=Endo-1,4-beta-xylanase A; Short=Xylanase A; AltName: Full=1,4-beta-D-xylan xylanohydrolase A; Flags: Precursor && PF00331:Glycosyl hydrolase family 10                                                                                                                                                                                                                                                                               |                            |
| Lachesis_group0__13_contigs__l.g992   | 19.44786 | 105.4685 | -2.4405  | 0.000203 | 0.002956 | 1593 | - && B8NHY4.1 RecName: Full=O-methylsterigmatocystin oxidoreductase; Short=OMST oxidoreductase; AltName: Full=Aflatoxin B synthase; AltName: Full=Aflatoxin biosynthesis protein Q; AltName: Full=Cytochrome P450 64 >P0CT93.1 RecName: Full=O-methylsterigmatocystin oxidoreductase; Short=OMST oxidoreductase; AltName: Full=Aflatoxin B synthase; AltName: Full=Aflatoxin biosynthesis protein Q; AltName: Full=Cytochrome P450 64 && PF00067:Cytochrome P450 |                            |
| Lachesis_group0__13_contigs__l.g541   | 563.9717 | 3071.92  | -2.44566 | 4.36E-06 | 0.000192 | 2256 | - && O74396.3 RecName: Full=Vacuolar protein sorting-associated protein 9a; AltName: Full=Vacuolar protein-targeting protein 9a && PF02204:Vacuolar sorting protein 9 (VPS9) domain PF02845:CUE domain                                                                                                                                                                                                                                                           |                            |
| Lachesis_group0__13_contigs__l.g11063 | 1702.756 | 9397.178 | -2.46446 | 1.95E-07 | 2.03E-05 | 2937 | - && O74954.1 RecName: Full=Transcription factor cbf11; AltName: Full=C-promoter element-binding factor-like protein 11 && PF09271:LAG1, DNA                                                                                                                                                                                                                                                                                                                     |                            |

|                                       |          |          |          |          |          |      |                                                                                                                                                                                               |
|---------------------------------------|----------|----------|----------|----------|----------|------|-----------------------------------------------------------------------------------------------------------------------------------------------------------------------------------------------|
|                                       |          |          |          |          |          |      | binding PF09270:Beta-trefoil DNA-binding domain                                                                                                                                               |
| Lachesis_group0__13_contigs__l.g8282  | 61.69746 | 340.6034 | -2.46613 | 1.60E-05 | 0.000484 | 1662 | - && F4JY37.1 RecName: Full=Serine/threonine-protein kinase RUNKEL; AltName: Full=Protein EMBRYO DEFECTIVE 3013; AltName: Full=Protein RUNKEL && PF07714:Protein tyrosine kinase              |
| Lachesis_group0__13_contigs__l.g7176  | 489.7301 | 2708.683 | -2.46776 | 1.12E-05 | 0.00037  | 432  | - && - && PF01172:Shwachman-Bodian-Diamond syndrome (SBDS) protein                                                                                                                            |
| Lachesis_group0__13_contigs__l.g2363  | 20.23132 | 111.8072 | -2.47054 | 0.000387 | 0.004668 | 1194 | - && Q25BW5.1 RecName: Full=Beta-glucosidase 1A; AltName: Full=Cellobiase 1A && PF00232:Glycosyl hydrolase family 1                                                                           |
| Lachesis_group0__13_contigs__l.g7661  | 21.78782 | 120.6334 | -2.4759  | 0.000302 | 0.003878 | 1476 | - && P25737.5 RecName: Full=Lysine-specific permease && PF00324:Amino acid permease                                                                                                           |
| Lachesis_group0__13_contigs__l.g597   | 2419.639 | 13473.17 | -2.47729 | 4.98E-06 | 0.000211 | 966  | - && O14283.2 RecName: Full=Transcription factor prr1; AltName: Full=Pombe response regulator 1 && PF00447:HSF-type DNA-binding                                                               |
| Lachesis_group0__13_contigs__l.g715   | 13828.39 | 77310.43 | -2.48304 | 0.000279 | 0.00369  | 2142 | - && Q0R4L2.1 RecName: Full=Pyranose dehydrogenase 3; Short=PDH 3; AltName: Full=Pyranose:quinone oxidoreductase 3; Flags: Precursor && PF00732:GMC oxidoreductase PF05199:GMC oxidoreductase |
| Lachesis_group0__13_contigs__l.g10375 | 2599.885 | 14591.79 | -2.48865 | 4.52E-05 | 0.001    | 510  | - && - && PF02755:RPEL repeat                                                                                                                                                                 |
| Lachesis_group0__13_contigs__l.g6301  | 170.7923 | 961.2931 | -2.49321 | 1.40E-06 | 8.18E-05 | 831  | - && O13871.1 RecName: Full=Uncharacterized methyltransferase C1B3.06c && PF13847:Methyltransferase domain                                                                                    |
| Lachesis_group0__13_contigs__l.g1953  | 20.01893 | 112.1206 | -2.49389 | 0.000544 | 0.00594  | 1104 | - && - && PF00149:Calcineurin-like phosphoesterase                                                                                                                                            |

|                                      |          |          |          |          |          |      |                                                                                                                                                                                                                                                                                                                     |
|--------------------------------------|----------|----------|----------|----------|----------|------|---------------------------------------------------------------------------------------------------------------------------------------------------------------------------------------------------------------------------------------------------------------------------------------------------------------------|
| Lachesis_group0__13_contigs__l.g1530 | 5567.918 | 31726.38 | -2.5105  | 3.12E-05 | 0.000757 | 4059 | - && P40406.1 RecName: Full=Beta-hexosaminidase; AltName: Full=Beta-N-acetylhexosaminidase; AltName: Full=N-acetyl-beta-glucosaminidase; AltName: Full=N-acetylglucosaminidase; AltName: Full=ORF1; Flags: Precursor && PF03127:GAT domain PF00790:VHS domain PF00933:Glycosyl hydrolase family 3 N terminal domain |
| Lachesis_group0__13_contigs__l.g9792 | 45.46637 | 258.9314 | -2.51184 | 0.000127 | 0.002134 | 1719 | - && Q756A9.2 RecName: Full=Acyl-coenzyme A oxidase; Short=Acyl-CoA oxidase && -                                                                                                                                                                                                                                    |
| Lachesis_group0__13_contigs__l.g5712 | 33.27713 | 189.7772 | -2.51407 | 0.000223 | 0.003166 | 2346 | - && - && PF00069:Protein kinase domain                                                                                                                                                                                                                                                                             |
| Lachesis_group0__13_contigs__l.g4634 | 2575.897 | 14785.83 | -2.5211  | 3.54E-06 | 0.000162 | 1077 | - && Q8NKE2.2 RecName: Full=Alternative oxidase, mitochondrial; Flags: Precursor && PF01786:Alternative oxidase                                                                                                                                                                                                     |
| Lachesis_group0__13_contigs__l.g7223 | 3526.044 | 20286.21 | -2.52438 | 0.001187 | 0.010357 | 546  | - && P16934.1 RecName: Full=Fruiting body protein SC4; AltName: Full=Hydrophobin SC4; Flags: Precursor && PF01185:Fungal hydrophobin                                                                                                                                                                                |
| Lachesis_group0__13_contigs__l.g5150 | 484.8153 | 2814.191 | -2.5374  | 1.69E-05 | 0.000507 | 2967 | - && P0CS23.1 RecName: Full=Urease; AltName: Full=Urea amidohydrolase >P0CS22.1 RecName: Full=Urease; AltName: Full=Urea amidohydrolase && PF00547:Urease, gamma subunit PF01979:Amidohydrolase family PF00449:Urease alpha-subunit, N-terminal domain PF00699:Urease beta subunit                                  |
| Lachesis_group0__13_contigs__l.g3904 | 273.8779 | 1614.594 | -2.55988 | 9.35E-07 | 6.24E-05 | 2031 | - && - && PF00561:alpha/beta hydrolase fold                                                                                                                                                                                                                                                                         |
| Lachesis_group0__13_contigs__l.g2038 | 5.910284 | 34.58698 | -2.56288 | 0.001931 | 0.014746 | 810  | - && - && PF12697:Alpha/beta hydrolase family                                                                                                                                                                                                                                                                       |

|                                      |          |          |          |          |          |      |                                                                                                                                                                                                                                                                                                                                                                                                                                     |
|--------------------------------------|----------|----------|----------|----------|----------|------|-------------------------------------------------------------------------------------------------------------------------------------------------------------------------------------------------------------------------------------------------------------------------------------------------------------------------------------------------------------------------------------------------------------------------------------|
| Lachesis_group0__13_contigs__l.g6565 | 27.07326 | 160.7314 | -2.57141 | 0.000158 | 0.002478 | 2814 | - && Q0CI48.2 RecName: Full=Beta-mannosidase A; AltName: Full=Mannanase A; Short=Mannase A; Flags: Precursor && -                                                                                                                                                                                                                                                                                                                   |
| Lachesis_group0__13_contigs__l.g7749 | 52.44716 | 312.4622 | -2.57543 | 8.21E-07 | 5.69E-05 | 1068 | - && P0CU27.1 RecName: Full=Protein-lysine N-methyltransferase EFM3; AltName: Full=Elongation factor methyltransferase 3 && PF10294:Lysine methyltransferase                                                                                                                                                                                                                                                                        |
| Lachesis_group0__13_contigs__l.g4973 | 2421.53  | 14531.77 | -2.58521 | 2.24E-05 | 0.000604 | 741  | - && - && PF12766:Pyridoxamine 5'-phosphate oxidase                                                                                                                                                                                                                                                                                                                                                                                 |
| Lachesis_group0__13_contigs__l.g8558 | 496.9343 | 3002.835 | -2.5954  | 1.37E-06 | 8.14E-05 | 1398 | - && Q50I20.1 RecName: Full=2-methylcitrate synthase, mitochondrial; Short=Methylcitrate synthase; AltName: Full=(2S,3S)-2-methylcitrate synthase; AltName: Full=Citrate synthase 1; Flags: Precursor >B0YD89.1 RecName: Full=2-methylcitrate synthase, mitochondrial; Short=Methylcitrate synthase; AltName: Full=(2S,3S)-2-methylcitrate synthase; AltName: Full=Citrate synthase 2; Flags: Precursor && PF00285:Citrate synthase |
| Lachesis_group0__13_contigs__l.g4253 | 2980.776 | 18052.61 | -2.59851 | 7.91E-05 | 0.001537 | 1395 | - && Q01358.1 RecName: Full=Protein bli-3 && PF16242:Pyridoxamine 5'-phosphate oxidase like                                                                                                                                                                                                                                                                                                                                         |
| Lachesis_group0__13_contigs__l.g9198 | 10.47774 | 63.23759 | -2.60034 | 6.84E-05 | 0.001373 | 432  | - && D4ALV6.1 RecName: Full=Allergen Asp f 15 homolg && PF07249:Cerato-platanin                                                                                                                                                                                                                                                                                                                                                     |
| Lachesis_group0__13_contigs__l.g3509 | 55.9726  | 341.1296 | -2.60861 | 0.000778 | 0.007684 | 1569 | - && Q01679.2 RecName: Full=Laccase; AltName: Full=Benzenediol:oxygen oxidoreductase; AltName: Full=Diphenol oxidase; AltName: Full=Ligninolytic phenoxidase; AltName: Full=Urishiol oxidase; Flags: Precursor &&                                                                                                                                                                                                                   |

|                                      |          |          |          |          |          |      |                                                                                                                                                                                                                      |
|--------------------------------------|----------|----------|----------|----------|----------|------|----------------------------------------------------------------------------------------------------------------------------------------------------------------------------------------------------------------------|
|                                      |          |          |          |          |          |      | PF00394:Multicopper oxidase PF07732:Multicopper oxidase PF07731:Multicopper oxidase                                                                                                                                  |
| Lachesis_group0__13_contigs__l.g4409 | 22.79304 | 138.9694 | -2.61034 | 0.000286 | 0.003755 | 4737 | - && G3Y416.1 RecName: Full=Cytochrome P450 monooxygenase yanC; AltName: Full=Yanuthone D synthesis protein C; Flags: Precursor && PF00067:Cytochrome P450 PF07993:Male sterility protein PF00501:AMP-binding enzyme |
| Lachesis_group0__13_contigs__l.g9971 | 416.9352 | 2553.677 | -2.61509 | 9.86E-05 | 0.001789 | 1428 | - && - && PF03595:Voltage-dependent anion channel                                                                                                                                                                    |
| Lachesis_group0__13_contigs__l.g7430 | 55.20419 | 340.2286 | -2.62432 | 0.00041  | 0.004847 | 1614 | - && Q9C0V8.1 RecName: Full=Uncharacterized transporter PB10D8.01 && PF07690:Major Facilitator Superfamily                                                                                                           |
| novel.1164                           | 235.2885 | 1475.231 | -2.64871 | 3.65E-07 | 3.20E-05 | 2041 | - && - && PF10164:Uncharacterized conserved protein (DUF2367)                                                                                                                                                        |
| Lachesis_group0__13_contigs__l.g1814 | 27.25119 | 172.3694 | -2.66358 | 3.98E-05 | 0.00092  | 2169 | - && P94593.2 RecName: Full=Uncharacterized ATP-dependent helicase YwqA && PF00176:SNF2 family N-terminal domain                                                                                                     |
| Lachesis_group0__13_contigs__l.g9472 | 37.42259 | 239.0129 | -2.67713 | 9.78E-05 | 0.001778 | 1485 | - && A1CFL6.2 RecName: Full=Cytochrome P450 monooxygenase patI; AltName: Full=Patulin synthesis protein I; AltName: Full=m-hydroxybenzyl alcohol hydroxylase; Flags: Precursor && PF00067:Cytochrome P450            |
| Lachesis_group0__13_contigs__l.g2517 | 21.14896 | 135.7462 | -2.68322 | 1.08E-05 | 0.000363 | 1395 | - && O34371.1 RecName: Full=Putative oxidoreductase YteT; Flags: Precursor && PF01408:Oxidoreductase family, NAD-binding Rossmann fold PF02894:Oxidoreductase family, C-terminal alpha/beta domain                   |

|                                       |          |          |          |          |          |      |                                                                                                                                                  |
|---------------------------------------|----------|----------|----------|----------|----------|------|--------------------------------------------------------------------------------------------------------------------------------------------------|
| Lachesis_group0__13_contigs__l.g6756  | 7041.781 | 45493.15 | -2.69165 | 0.000108 | 0.001905 | 552  | - && P16081.3 RecName: Full=Nitrate reductase [NADH] 1; Short=NR1 && PF00173:Cytochrome b5-like Heme/Steroid binding domain                      |
| Lachesis_group0__13_contigs__l.g4353  | 146.9404 | 950.0891 | -2.69363 | 2.23E-06 | 0.000115 | 630  | - && - && PF08534:Redoxin                                                                                                                        |
| Lachesis_group0__13_contigs__l.g6191  | 52.25646 | 339.0432 | -2.69779 | 2.71E-08 | 5.12E-06 | 1002 | - && Q9UTA1.2 RecName: Full=Zinc finger protein C25B8.19c && -                                                                                   |
| Lachesis_group0__13_contigs__l.g281   | 77.62053 | 506.8882 | -2.70883 | 7.64E-05 | 0.001498 | 2409 | - && - && PF17107:N-terminal domain on NACHT_NTPase and P-loop NTPases                                                                           |
| Lachesis_group0__13_contigs__l.g6312  | 1437.268 | 9402.098 | -2.70968 | 7.78E-08 | 1.09E-05 | 339  | - && - && PF10937:Protein of unknown function (DUF2638)                                                                                          |
| Lachesis_group0__13_contigs__l.g598   | 623.595  | 4117.359 | -2.72315 | 0.000179 | 0.002674 | 807  | - && O14283.2 RecName: Full=Transcription factor prr1; AltName: Full=Pombe response regulator 1 && PF00447:HSF-type DNA-binding                  |
| Lachesis_group0__13_contigs__l.g9752  | 403.1238 | 2676.42  | -2.7313  | 9.66E-10 | 2.86E-07 | 375  | - && O95563.1 RecName: Full=Mitochondrial pyruvate carrier 2; AltName: Full=Brain protein 44 && PF03650:Uncharacterised protein family (UPF0041) |
| Lachesis_group0__13_contigs__l.g8242  | 228.7681 | 1523.428 | -2.73565 | 3.25E-10 | 1.27E-07 | 1185 | - && - && PF00652:Ricin-type beta-trefoil lectin domain                                                                                          |
| Lachesis_group0__13_contigs__l.g10522 | 292.8221 | 1965.715 | -2.74743 | 0.00011  | 0.001934 | 1503 | - && O74187.1 RecName: Full=Aldehyde dehydrogenase; Short=ALDDH; Short=ALDH && PF00171:Aldehyde dehydrogenase family                             |
| Lachesis_group0__13_contigs__l.g2276  | 59.37432 | 398.8576 | -2.75133 | 9.54E-07 | 6.33E-05 | 1551 | - && Q25BW4.1 RecName: Full=Beta-glucosidase 1B; AltName: Full=Cellobiase 1B && PF00232:Glycosyl hydrolase family 1                              |
| Lachesis_group0__13_contigs__l.g8727  | 100.2195 | 678.1872 | -2.76    | 1.86E-08 | 3.99E-06 | 2337 | - && Q9URY8.1 RecName: Full=Probable sulfate permease C869.05c && PF01740:STAS domain PF00916:Sulfate permease family                            |



|                                      |          |          |          |          |          |      |                                                                                                                                                                                                                                                                                                                                                                            |
|--------------------------------------|----------|----------|----------|----------|----------|------|----------------------------------------------------------------------------------------------------------------------------------------------------------------------------------------------------------------------------------------------------------------------------------------------------------------------------------------------------------------------------|
| Lachesis_group0__13_contigs__l.g4541 | 17.30946 | 117.1432 | -2.76077 | 6.08E-05 | 0.001246 | 1155 | - && Q8RXK7.2 RecName: Full=Probable pectinesterase/pectinesterase inhibitor 41; Includes: RecName: Full=Pectinesterase inhibitor 41; AltName: Full=Pectin methylesterase inhibitor 41; Includes: RecName: Full=Pectinesterase 41; Short=PE 41; AltName: Full=AtPMEpcrB; AltName: Full=Pectin methylesterase 41; Short=AtPME41; Flags: Precursor && PF01095:Pectinesterase |
| Lachesis_group0__13_contigs__l.g3973 | 23.26589 | 157.7457 | -2.76095 | 1.75E-06 | 9.60E-05 | 723  | - && O94255.2 RecName: Full=Carbonic anhydrase; AltName: Full=Carbonate dehydratase && PF00484:Carbonic anhydrase                                                                                                                                                                                                                                                          |
| Lachesis_group0__13_contigs__l.g4960 | 6.67418  | 44.95734 | -2.76108 | 0.00052  | 0.00575  | 1203 | - && Q9HEZ1.1 RecName: Full=Endo-1,4-beta-xylanase A; Short=Xylanase A; AltName: Full=1,4-beta-D-xylan xylanohydrolase A; Flags: Precursor && PF00331:Glycosyl hydrolase family 10 PF00734:Fungal cellulose binding domain                                                                                                                                                 |
| Lachesis_group0__13_contigs__l.g9763 | 3347.452 | 22944.08 | -2.77699 | 9.03E-08 | 1.24E-05 | 2370 | - && O95563.1 RecName: Full=Mitochondrial pyruvate carrier 2; AltName: Full=Brain protein 44 && PF03650:Uncharacterised protein family (UPF0041)                                                                                                                                                                                                                           |
| Lachesis_group0__13_contigs__l.g9768 | 55.0673  | 376.7959 | -2.77701 | 1.73E-06 | 9.57E-05 | 2799 | - && Q2U4L7.2 RecName: Full=Glutaminase A; Flags: Precursor && PF16335:Domain of unknown function (DUF4965) PF08760:Domain of unknown function (DUF1793)                                                                                                                                                                                                                   |
| Lachesis_group0__13_contigs__l.g5245 | 874.8145 | 5996.985 | -2.77718 | 5.81E-09 | 1.41E-06 | 2412 | - && G0SGU4.1 RecName: Full=Formate dehydrogenase; Short=FDH; AltName: Full=NAD-dependent formate dehydrogenase && PF00389:D-isomer specific 2-hydroxyacid dehydrogenase,                                                                                                                                                                                                  |

|                                      |          |          |          |          |          |      |                                                                                                                                                                                                                                                                                                                                                                                                                       |
|--------------------------------------|----------|----------|----------|----------|----------|------|-----------------------------------------------------------------------------------------------------------------------------------------------------------------------------------------------------------------------------------------------------------------------------------------------------------------------------------------------------------------------------------------------------------------------|
|                                      |          |          |          |          |          |      | catalytic domain PF02826:D-isomer specific 2-hydroxyacid dehydrogenase, NAD binding domain                                                                                                                                                                                                                                                                                                                            |
| Lachesis_group0__13_contigs__l.g6438 | 43.96429 | 302.5472 | -2.78534 | 6.97E-05 | 0.001393 | 1077 | - && Q76NT9.1 RecName: Full=1-aminocyclopropane-1-carboxylate oxidase; Short=ACC oxidase; Short=Ddaco; AltName: Full=Ethylene-forming enzyme; Short=EFE >A6BM06.1 RecName: Full=1-aminocyclopropane-1-carboxylate oxidase; Short=ACC oxidase; Short=Dmaco; AltName: Full=Ethylene-forming enzyme; Short=EFE && PF03171:2OG-Fe(II) oxygenase superfamily PF14226:non-haem dioxygenase in morphine synthesis N-terminal |
| Lachesis_group0__13_contigs__l.g3548 | 57.85675 | 398.3266 | -2.78618 | 1.87E-05 | 0.000543 | 3453 | - && A0A0D2YG01.1 RecName: Full=Non-canonical non-ribosomal peptide synthetase FUB8; AltName: Full=Fusaric acid biosynthesis protein 8 && PF00501:AMP-binding enzyme PF07993:Male sterility protein                                                                                                                                                                                                                   |
| Lachesis_group0__13_contigs__l.g7950 | 23.55884 | 163.5909 | -2.79672 | 3.37E-05 | 0.000801 | 1371 | - && A9JPE2.1 RecName: Full=Cytochrome P450 monooxygenase atmQ; AltName: Full=Aflatrem synthesis protein Q && PF00067:Cytochrome P450                                                                                                                                                                                                                                                                                 |
| Lachesis_group0__13_contigs__l.g4108 | 24.23135 | 168.9261 | -2.80466 | 2.58E-05 | 0.000673 | 657  | - && - && PF00583:Acetyltransferase (GNAT) family                                                                                                                                                                                                                                                                                                                                                                     |
| Lachesis_group0__13_contigs__l.g9972 | 1606.2   | 11224.42 | -2.80495 | 1.91E-05 | 0.000549 | 1602 | - && - && PF03595:Voltage-dependent anion channel                                                                                                                                                                                                                                                                                                                                                                     |
| Lachesis_group0__13_contigs__l.g9767 | 62.89084 | 439.6502 | -2.80609 | 6.96E-06 | 0.000267 | 2613 | - && D4AMT2.2 RecName: Full=Probable glutaminase ARB_05535/05536; Flags: Precursor                                                                                                                                                                                                                                                                                                                                    |

|                                       |          |          |          |          |          |      |                                                                                                                                                                                                                                                                                                                   |
|---------------------------------------|----------|----------|----------|----------|----------|------|-------------------------------------------------------------------------------------------------------------------------------------------------------------------------------------------------------------------------------------------------------------------------------------------------------------------|
|                                       |          |          |          |          |          |      | && PF08760:Domain of unknown function (DUF1793) PF16335:Domain of unknown function (DUF4965)                                                                                                                                                                                                                      |
| Lachesis_group0__13_contigs__l.g8030  | 446.8137 | 3166.306 | -2.82527 | 6.38E-05 | 0.001296 | 330  | - && P29429.2 RecName: Full=Thioredoxin; Short=Trx && PF00085:Thioredoxin                                                                                                                                                                                                                                         |
| Lachesis_group0__13_contigs__l.g10523 | 599.3889 | 4250.144 | -2.82623 | 6.92E-07 | 5.19E-05 | 1503 | - && O74187.1 RecName: Full=Aldehyde dehydrogenase; Short=ALDDH; Short=ALDH && PF00171:Aldehyde dehydrogenase family                                                                                                                                                                                              |
| Lachesis_group0__13_contigs__l.g10102 | 6.549378 | 46.83855 | -2.84136 | 0.000438 | 0.005095 | 1599 | - && Q9M156.1 RecName: Full=UDP-glycosyltransferase 72B1; AltName: Full=Arbutin synthase; AltName: Full=Probable hydroquinone glucosyltransferase && PF00201:UDP-glucoronosyl and UDP-glucosyl transferase                                                                                                        |
| Lachesis_group0__13_contigs__l.g9674  | 38.48242 | 275.7183 | -2.84345 | 2.81E-05 | 0.000707 | 3369 | - && Q4WRH9.1 RecName: Full=Probable alpha/beta-glucosidase agdC; Flags: Precursor >B0XNL6.1 RecName: Full=Probable alpha/beta-glucosidase agdC; Flags: Precursor && PF01055:Glycosyl hydrolases family 31 PF13802:Galactose mutarotase-like PF16863:N-terminal barrel of NtMGAM and CtMGAM, maltase-glucoamylase |
| Lachesis_group0__13_contigs__l.g282   | 8.628678 | 61.98294 | -2.85304 | 0.000338 | 0.004201 | 1587 | - && O60020.1 RecName: Full=Aspartic protease; Flags: Precursor && PF00026:Eukaryotic aspartyl protease                                                                                                                                                                                                           |
| Lachesis_group0__13_contigs__l.g9562  | 807.0415 | 5858.317 | -2.86002 | 1.80E-08 | 3.99E-06 | 423  | - && D4ALV6.1 RecName: Full=Allergen Asp f 15 homolg && PF07249:Cerato-platanin                                                                                                                                                                                                                                   |
| Lachesis_group0__13_contigs__l.g10899 | 375.3244 | 2750.875 | -2.87356 | 1.84E-08 | 3.99E-06 | 1500 | - && Q54HD2.1 RecName: Full=Probable serine/threonine-protein kinase ndrD; AltName:                                                                                                                                                                                                                               |

|                                       |          |          |          |          |          |      |                                                                                                                                                                                                                                                                                                                             |
|---------------------------------------|----------|----------|----------|----------|----------|------|-----------------------------------------------------------------------------------------------------------------------------------------------------------------------------------------------------------------------------------------------------------------------------------------------------------------------------|
|                                       |          |          |          |          |          |      | Full=Nuclear DBF2-related kinase D && PF00069:Protein kinase domain                                                                                                                                                                                                                                                         |
| Lachesis_group0__13_contigs__l.g8704  | 117.7508 | 862.3373 | -2.87403 | 5.73E-06 | 0.000232 | 1488 | - && - && PF04616:Glycosyl hydrolases family 43                                                                                                                                                                                                                                                                             |
| Lachesis_group0__13_contigs__l.g8376  | 390.1342 | 2863.372 | -2.87603 | 9.56E-05 | 0.001758 | 339  | - && - && PF01185:Fungal hydrophobin                                                                                                                                                                                                                                                                                        |
| Lachesis_group0__13_contigs__l.g10552 | 20.86255 | 153.6198 | -2.88562 | 3.32E-05 | 0.000792 | 1032 | - && Q9UVP6.1 RecName: Full=Versatile peroxidase VPS1; AltName: Full=Versatile solid phase peroxidase 1; Flags: Precursor && PF00141:Peroxidase PF11895:Domain of unknown function (DUF3415)                                                                                                                                |
| Lachesis_group0__13_contigs__l.g6193  | 27.85097 | 206.4064 | -2.89722 | 1.75E-05 | 0.000516 | 1662 | - && A2QEQ6.1 RecName: Full=Beta-glucuronidase; Short=GlcAase; AltName: Full=Beta-D-glucuronoside glucuronosohydrolase; Flags: Precursor && PF16862:Glycosyl hydrolase family 79 C-terminal beta domain                                                                                                                     |
| Lachesis_group0__13_contigs__l.g10515 | 40.96971 | 307.756  | -2.91168 | 4.02E-05 | 0.000926 | 1662 | - && - && PF00501:AMP-binding enzyme                                                                                                                                                                                                                                                                                        |
| Lachesis_group0__13_contigs__l.g7178  | 139.0624 | 1046.726 | -2.91252 | 2.15E-06 | 0.000112 | 2577 | - && A1CA51.1 RecName: Full=Probable beta-glucosidase I; AltName: Full=Beta-D-glucoside glucosohydrolase I; AltName: Full=Cellobiase I; AltName: Full=Gentiobiase I && PF00933:Glycosyl hydrolase family 3 N terminal domain PF01915:Glycosyl hydrolase family 3 C-terminal domain PF14310:Fibronectin type III-like domain |
| Lachesis_group0__13_contigs__l.g6878  | 357.1863 | 2714.202 | -2.92605 | 4.78E-07 | 4.00E-05 | 1164 | - && O74750.1 RecName: Full=UDP-N-acetylglucosamine transporter yea4 && PF08449:UAA transporter family                                                                                                                                                                                                                      |

|                                       |          |          |          |          |          |      |                                                                                                                                                                                                                                                                                                               |
|---------------------------------------|----------|----------|----------|----------|----------|------|---------------------------------------------------------------------------------------------------------------------------------------------------------------------------------------------------------------------------------------------------------------------------------------------------------------|
| Lachesis_group0__13_contigs__l.g4414  | 6.461149 | 49.03659 | -2.93928 | 0.00012  | 0.002043 | 1326 | - && O94343.1 RecName: Full=Uncharacterized MFS-type transporter C1271.10c && PF07690:Major Facilitator Superfamily                                                                                                                                                                                           |
| Lachesis_group0__13_contigs__l.g8595  | 2263.769 | 17583.32 | -2.95749 | 4.30E-08 | 7.53E-06 | 882  | - && A3PXS9.1 RecName: Full=Uncharacterized oxidoreductase Mjls_1918 && PF00248:Aldo/keto reductase family                                                                                                                                                                                                    |
| Lachesis_group0__13_contigs__l.g1711  | 33.74045 | 265.5457 | -2.97527 | 4.96E-05 | 0.00106  | 1452 | - && B7ID58.1 RecName: Full=8-amino-7-oxononanoate synthase; Short=AONS; AltName: Full=7-keto-8-amino-pelargonic acid synthase; Short=7-KAP synthase; Short=KAPA synthase; AltName: Full=8-amino-7-ketopelargonate synthase; AltName: Full=Alpha-oxoamine synthase && PF00155:Aminotransferase class I and II |
| Lachesis_group0__13_contigs__l.g3871  | 26.13948 | 208.1346 | -2.98986 | 5.85E-07 | 4.61E-05 | 2310 | - && C5PFX0.2 RecName: Full=Nuclear distribution protein PAC1; AltName: Full=Lissencephaly-1 homolog; Short=LIS-1; AltName: Full=nudF homolog && PF00400:WD domain, G-beta repeat                                                                                                                             |
| Lachesis_group0__13_contigs__l.g10697 | 15.41554 | 121.7612 | -2.99068 | 4.49E-05 | 0.001    | 330  | - && - && PF12770:CHAT domain                                                                                                                                                                                                                                                                                 |
| Lachesis_group0__13_contigs__l.g10011 | 45.08053 | 363.8037 | -3.01242 | 4.05E-05 | 0.000929 | 2391 | - && D4B0V1.1 RecName: Full=Probable glucan endo-1,3-beta-glucosidase ARB_02077; AltName: Full=(1->3)-beta-glucan endohydrolase ARB_02077; Short=(1->3)-beta-glucanase ARB_02077; Flags: Precursor && PF12708:Pectate lyase superfamily protein                                                               |
| Lachesis_group0__13_contigs__l.g4685  | 832.5773 | 6812.08  | -3.03246 | 9.40E-08 | 1.26E-05 | 549  | - && P0AE54.1 RecName: Full=Putative peroxiredoxin bcp; AltName: Full=Bacterioferritin comigratory protein; AltName: Full=Thioredoxin                                                                                                                                                                         |

|                                       |          |          |          |          |          |      |                                                                                                                                                                                                                                                                                                                                                                                                                                                                                                  |
|---------------------------------------|----------|----------|----------|----------|----------|------|--------------------------------------------------------------------------------------------------------------------------------------------------------------------------------------------------------------------------------------------------------------------------------------------------------------------------------------------------------------------------------------------------------------------------------------------------------------------------------------------------|
|                                       |          |          |          |          |          |      | <p>reductase &gt;P0AE53.1 RecName: Full=Putative peroxiredoxin bcp; AltName: Full=Bacterioferritin comigratory protein; AltName: Full=Thioredoxin reductase &gt;P0AE52.1 RecName: Full=Putative peroxiredoxin bcp; AltName: Full=Bacterioferritin comigratory protein; AltName: Full=Thioredoxin reductase &gt;P0AE55.1 RecName: Full=Putative peroxiredoxin bcp; AltName: Full=Bacterioferritin comigratory protein; AltName: Full=Thioredoxin reductase &amp;&amp; PF00578:AhpC/TSA family</p> |
| Lachesis_group0__13_contigs__l.g10661 | 9.081972 | 74.91966 | -3.03795 | 2.35E-06 | 0.000119 | 6573 | <p>- &amp;&amp; Q8BV79.3 RecName: Full=TPR and ankyrin repeat-containing protein 1; AltName: Full=Lupus brain antigen 1 &amp;&amp; PF13361:UvrD-like helicase C-terminal domain PF00580:UvrD/REP helicase N-terminal domain</p>                                                                                                                                                                                                                                                                  |
| Lachesis_group0__13_contigs__l.g5121  | 883.8805 | 7395.751 | -3.0649  | 1.49E-11 | 1.26E-08 | 813  | <p>- &amp;&amp; Q9ZNN8.1 RecName: Full=L-2,3-butanediol dehydrogenase; Short=L-BDH; AltName: Full=(S,S)-butanediol dehydrogenase; AltName: Full=Diacetyl reductase [(S)-acetoin forming] &amp;&amp; PF00106:short chain dehydrogenase</p>                                                                                                                                                                                                                                                        |
| Lachesis_group0__13_contigs__l.g3254  | 84.49643 | 711.2741 | -3.07419 | 1.82E-06 | 9.87E-05 | 3033 | <p>- &amp;&amp; - &amp;&amp; PF00004:ATPase family associated with various cellular activities (AAA)</p>                                                                                                                                                                                                                                                                                                                                                                                         |
| Lachesis_group0__13_contigs__l.g60    | 60.18585 | 507.9476 | -3.07766 | 2.36E-06 | 0.000119 | 1077 | <p>- &amp;&amp; Q4WBW4.1 RecName: Full=Probable acetylxytan esterase A; Flags: Precursor &amp;&amp; PF10503:Esterase PHB depolymerase</p>                                                                                                                                                                                                                                                                                                                                                        |
| Lachesis_group0__13_contigs__l.g797   | 255.7724 | 2237.054 | -3.12905 | 2.93E-07 | 2.65E-05 | 2097 | <p>- &amp;&amp; - &amp;&amp; PF00004:ATPase family associated with various cellular activities (AAA)</p>                                                                                                                                                                                                                                                                                                                                                                                         |

|                                      |          |          |          |          |          |      |                                                                                                                                                                                                                                                                      |
|--------------------------------------|----------|----------|----------|----------|----------|------|----------------------------------------------------------------------------------------------------------------------------------------------------------------------------------------------------------------------------------------------------------------------|
| Lachesis_group0__13_contigs__l.g5403 | 28136.55 | 247393.8 | -3.1363  | 7.38E-06 | 0.000281 | 1074 | - && P43067.1 RecName: Full=Alcohol dehydrogenase 1; AltName: Full=40 kDa allergen; AltName: Full=Allergen Can a 1; AltName: Full=Allergen Can a I; AltName: Allergen=Cand a 1 && PF08240:Alcohol dehydrogenase GroES-like domain PF00107:Zinc-binding dehydrogenase |
| Lachesis_group0__13_contigs__l.g2012 | 19.39473 | 171.9361 | -3.14861 | 6.66E-07 | 5.10E-05 | 2025 | - && Q0CTV2.1 RecName: Full=Probable alpha-L-arabinofuranosidase A; Short=ABF A; Short=Arabinosidase A; Flags: Precursor && PF06964:Alpha-L-arabinofuranosidase C-terminus                                                                                           |
| Lachesis_group0__13_contigs__l.g8862 | 42.79032 | 383.5093 | -3.16353 | 4.48E-06 | 0.000195 | 1383 | - && Q8R0V5.3 RecName: Full=Indoleamine 2,3-dioxygenase 2; Short=IDO-2; AltName: Full=Indoleamine 2,3-dioxygenase-like protein 1; AltName: Full=Indoleamine-pyrrole 2,3-dioxygenase-like protein 1 && PF01231:Indoleamine 2,3-dioxygenase                            |
| Lachesis_group0__13_contigs__l.g150  | 25.75253 | 230.8453 | -3.16473 | 2.05E-06 | 0.000108 | 1164 | - && Q04835.1 RecName: Full=Uncharacterized membrane protein YMR253C && PF00892:EamA-like transporter family                                                                                                                                                         |
| Lachesis_group0__13_contigs__l.g5942 | 158.6916 | 1425.759 | -3.16838 | 1.05E-11 | 1.15E-08 | 1047 | - && P43549.1 RecName: Full=Uncharacterized membrane protein YFL054C && PF00230:Major intrinsic protein                                                                                                                                                              |
| Lachesis_group0__13_contigs__l.g3054 | 6304.308 | 57234.26 | -3.18248 | 8.37E-06 | 0.000302 | 3528 | - && P05023.1 RecName: Full=Sodium/potassium-transporting ATPase subunit alpha-1; Short=Na(+)/K(+) ATPase alpha-1 subunit; AltName: Full=Sodium pump subunit alpha-1; Flags: Precursor && PF13246:Cation transport ATPase (P-type) PF00702:haloacid dehalogenase-    |

|                                      |          |          |          |          |          |      |                                                                                                                                                                                                                                                                                                         |
|--------------------------------------|----------|----------|----------|----------|----------|------|---------------------------------------------------------------------------------------------------------------------------------------------------------------------------------------------------------------------------------------------------------------------------------------------------------|
|                                      |          |          |          |          |          |      | like hydrolase PF00122:E1-E2 ATPase PF00690:Cation transporter/ATPase, N-terminus PF00689:Cation transporting ATPase, C-terminus                                                                                                                                                                        |
| Lachesis_group0__13_contigs__l.g5530 | 130.7982 | 1209.49  | -3.20988 | 8.48E-06 | 0.000304 | 1578 | - && P07921.1 RecName: Full=Lactose permease && PF00083:Sugar (and other) transporter                                                                                                                                                                                                                   |
| Lachesis_group0__13_contigs__l.g1739 | 172.6872 | 1617.421 | -3.22859 | 1.94E-07 | 2.03E-05 | 1803 | - && Q00922.1 RecName: Full=Alcohol oxidase; Short=AO; Short=AOX; AltName: Full=Methanol oxidase; Short=MOX && PF05199:GMC oxidoreductase PF00732:GMC oxidoreductase                                                                                                                                    |
| Lachesis_group0__13_contigs__l.g552  | 34.76921 | 327.3336 | -3.23993 | 1.83E-07 | 1.97E-05 | 1968 | - && Q5G234.1 RecName: Full=Pyranose 2-oxidase; Short=P2Ox; Short=POD; Short=POx; Short=PROD; Short=Pyranose oxidase; AltName: Full=FAD-oxidoreductase; AltName: Full=Glucose 2-oxidase; AltName: Full=Pyranose:oxygen 2-oxidoreductase; Flags: Precursor && PF05199:GMC oxidoreductase                 |
| Lachesis_group0__13_contigs__l.g3661 | 5.132983 | 50.00194 | -3.28247 | 0.000202 | 0.002949 | 792  | - && - && PF11807:Domain of unknown function (DUF3328)                                                                                                                                                                                                                                                  |
| Lachesis_group0__13_contigs__l.g2185 | 25.29586 | 252.7126 | -3.31928 | 4.30E-09 | 1.10E-06 | 1935 | - && - && PF00856:SET domain                                                                                                                                                                                                                                                                            |
| Lachesis_group0__13_contigs__l.g9559 | 1181.206 | 11865.42 | -3.32844 | 2.71E-06 | 0.000133 | 8046 | - && P04323.1 RecName: Full=Retrovirus-related Pol polypotein from transposon 17.6; Includes: RecName: Full=Protease; Includes: RecName: Full=Reverse transcriptase; Includes: RecName: Full=Endonuclease && PF00665:Integrase core domain PF00078:Reverse transcriptase (RNA-dependent DNA polymerase) |
| Lachesis_group0__13_contigs__l.g5078 | 5166.296 | 51955.64 | -3.33011 | 1.73E-05 | 0.000515 | 2307 | - && O74770.1 RecName: Full=Probable phosphoketolase && PF09363:XFP C-terminal                                                                                                                                                                                                                          |



|                                      |          |          |          |          |          |      |                                                                                                                                                                                         |
|--------------------------------------|----------|----------|----------|----------|----------|------|-----------------------------------------------------------------------------------------------------------------------------------------------------------------------------------------|
|                                      |          |          |          |          |          |      | domain PF09364:AFP N-terminal<br>domain PF03894:D-xylulose 5-phosphate/D-fructose 6-phosphate phosphoketolase                                                                           |
| Lachesis_group0__13_contigs__l.g5077 | 604.3613 | 6097.503 | -3.33504 | 2.29E-06 | 0.000117 | 1395 | - && Q7SH17.3 RecName: Full=Probable acetate kinase; AltName: Full=Acetokinase >Q5B3G6.2 RecName: Full=Probable acetate kinase; AltName: Full=Acetokinase && PF00871:Acetokinase family |
| Lachesis_group0__13_contigs__l.g6766 | 256.8489 | 2600.56  | -3.34015 | 4.75E-07 | 4.00E-05 | 2499 | - && I2C092.1 RecName: Full=Beta-mannosidase B; AltName: Full=Mannanase B; Short=Mannase B && -                                                                                         |
| Lachesis_group0__13_contigs__l.g8160 | 22.49133 | 230.1008 | -3.35651 | 9.73E-06 | 0.000335 | 1380 | - && P23262.4 RecName: Full=Salicylate hydroxylase; AltName: Full=Salicylate 1-monooxygenase && PF13450:NAD(P)-binding Rossmann-like domain PF01494:FAD binding domain                  |
| Lachesis_group0__13_contigs__l.g8241 | 4.071437 | 42.70868 | -3.39569 | 0.000401 | 0.00479  | 885  | - && - && PF00652:Ricin-type beta-trefoil lectin domain                                                                                                                                 |
| Lachesis_group0__13_contigs__l.g5319 | 310.8334 | 3313.944 | -3.41496 | 1.00E-05 | 0.000342 | 2592 | - && Q00922.1 RecName: Full=Alcohol oxidase; Short=AO; Short=AOX; AltName: Full=Methanol oxidase; Short=MOX && PF05199:GMC oxidoreductase PF00732:GMC oxidoreductase                    |
| Lachesis_group0__13_contigs__l.g4683 | 47.52527 | 515.5346 | -3.44343 | 5.68E-08 | 8.89E-06 | 2316 | - && Q9Y6Z9.1 RecName: Full=Sorbose reductase sou1; AltName: Full=Sorbitol utilization protein sou1 && PF13561:Enoyl-(Acyl carrier protein) reductase PF00106:short chain dehydrogenase |
| Lachesis_group0__13_contigs__l.g7748 | 978.4852 | 10758.4  | -3.4588  | 8.44E-10 | 2.57E-07 | 849  | - && - && PF08325:WLM domain                                                                                                                                                            |
| Lachesis_group0__13_contigs__l.g9406 | 79.79915 | 900.7947 | -3.49909 | 8.73E-09 | 2.08E-06 | 2289 | - && Q4WFI6.1 RecName: Full=Probable exo-1,4-beta-xylosidase bxlB; AltName: Full=1,4-beta-D-                                                                                            |

|                                       |          |          |          |          |          |      |                                                                                                                                                                                                                                                                                                                                                                                                                                                                           |
|---------------------------------------|----------|----------|----------|----------|----------|------|---------------------------------------------------------------------------------------------------------------------------------------------------------------------------------------------------------------------------------------------------------------------------------------------------------------------------------------------------------------------------------------------------------------------------------------------------------------------------|
|                                       |          |          |          |          |          |      | xylan xylohydrolase bxlB; AltName: Full=Beta-xylosidase bxlB; AltName: Full=Xylobiase bxlB; Flags: Precursor >B0Y0I4.1 RecName: Full=Probable exo-1,4-beta-xylosidase bxlB; AltName: Full=1,4-beta-D-xylan xylohydrolase bxlB; AltName: Full=Beta-xylosidase bxlB; AltName: Full=Xylobiase bxlB; Flags: Precursor && PF01915:Glycosyl hydrolase family 3 C-terminal domain PF14310:Fibronectin type III-like domain PF00933:Glycosyl hydrolase family 3 N terminal domain |
| Lachesis_group0__13_contigs__l.g10950 | 2595.911 | 30343.71 | -3.54716 | 7.26E-11 | 3.62E-08 | 981  | - && Q876L8.1 RecName: Full=NAD(P)H-dependent D-xylose reductase xyl1; Short=XR && PF00248:Aldo/keto reductase family                                                                                                                                                                                                                                                                                                                                                     |
| Lachesis_group0__13_contigs__l.g8243  | 226.0125 | 2642.785 | -3.54806 | 1.05E-06 | 6.75E-05 | 882  | - && - && PF00652:Ricin-type beta-trefoil lectin domain                                                                                                                                                                                                                                                                                                                                                                                                                   |
| Lachesis_group0__13_contigs__l.g11663 | 1095.751 | 12866.86 | -3.55377 | 1.17E-07 | 1.45E-05 | 1266 | - && P20368.2 RecName: Full=Alcohol dehydrogenase 1; AltName: Full=Alcohol dehydrogenase I; Short=ADH I && PF08240:Alcohol dehydrogenase GroES-like domain PF00107:Zinc-binding dehydrogenase                                                                                                                                                                                                                                                                             |
| Lachesis_group0__13_contigs__l.g10079 | 1.074307 | 13.04019 | -3.59567 | 0.009871 | 0.046838 | 1515 | - && P87035.1 RecName: Full=Guanine nucleotide-binding protein alpha-4 subunit && PF00503:G-protein alpha subunit                                                                                                                                                                                                                                                                                                                                                         |
| Lachesis_group0__13_contigs__l.g8740  | 1856.669 | 22754.05 | -3.61529 | 1.28E-11 | 1.18E-08 | 1641 | - && - && PF01936:NYN domain                                                                                                                                                                                                                                                                                                                                                                                                                                              |
| Lachesis_group0__13_contigs__l.g7267  | 60.34654 | 766.8509 | -3.66899 | 1.12E-06 | 7.11E-05 | 1887 | - && P36619.2 RecName: Full=Leptomycin B resistance protein pmd1 && PF00005:ABC transporter                                                                                                                                                                                                                                                                                                                                                                               |

|                                       |          |          |          |          |          |      |                                                                                                                                                                                                                          |
|---------------------------------------|----------|----------|----------|----------|----------|------|--------------------------------------------------------------------------------------------------------------------------------------------------------------------------------------------------------------------------|
| Lachesis_group0__13_contigs__l.g837   | 2763.38  | 35941.77 | -3.7012  | 7.07E-07 | 5.27E-05 | 1053 | - && Q01284.1 RecName: Full=Nitronate monooxygenase; AltName: Full=2-nitropropane dioxygenase; Short=2-NPD; AltName: Full=Nitroalkane oxidase; Flags: Precursor && PF03060:Nitronate monooxygenase                       |
| Lachesis_group0__13_contigs__l.g8159  | 67.79935 | 889.0704 | -3.71485 | 1.54E-10 | 6.51E-08 | 1365 | - && P23262.4 RecName: Full=Salicylate hydroxylase; AltName: Full=Salicylate 1-monooxygenase && PF01494:FAD binding domain                                                                                               |
| Lachesis_group0__13_contigs__l.g4059  | 20.46562 | 281.5701 | -3.78713 | 2.38E-10 | 9.64E-08 | 564  | - && - && PF07883:Cupin domain                                                                                                                                                                                           |
| Lachesis_group0__13_contigs__l.g10575 | 692.1531 | 10220.03 | -3.88445 | 3.84E-12 | 5.26E-09 | 3297 | - && Q9XF67.1 RecName: Full=3-phosphoinositide-dependent protein kinase 1; Short=AtPDK1 && PF00069:Protein kinase domain                                                                                                 |
| Lachesis_group0__13_contigs__l.g4400  | 3.467628 | 55.56105 | -3.996   | 2.01E-05 | 0.000561 | 1845 | - && Q47944.1 RecName: Full=L-sorbose 1-dehydrogenase; Short=SDH && PF05199:GMC oxidoreductase PF00732:GMC oxidoreductase                                                                                                |
| Lachesis_group0__13_contigs__l.g5817  | 1113.282 | 20396.81 | -4.19562 | 1.22E-10 | 5.34E-08 | 5838 | - && P41820.1 RecName: Full=Brefeldin A resistance protein && PF06422:CDR ABC transporter PF00005:ABC transporter PF01061:ABC-2 type transporter PF00656:Caspase domain PF14510:ABC-transporter extracellular N-terminal |
| Lachesis_group0__13_contigs__l.g1604  | 68.76389 | 1274.903 | -4.21571 | 4.07E-10 | 1.54E-07 | 3090 | - && - && PF15979:Glycosyl hydrolase family 115                                                                                                                                                                          |
| Lachesis_group0__13_contigs__l.g1951  | 15.65771 | 293.0657 | -4.23178 | 4.06E-07 | 3.47E-05 | 459  | - && - && PF16850:Peptidase inhibitor I66                                                                                                                                                                                |
| Lachesis_group0__13_contigs__l.g9199  | 533.8933 | 11554.32 | -4.43579 | 5.30E-11 | 3.23E-08 | 435  | - && P0CW95.1 RecName: Full=Heat-stable 19 kDa antigen; AltName: Full=Coccidioides-specific antigen; Short=CS antigen; Short=CS-AG; AltName: Full=Precipitin antigen; AltName: Full=TP-AG;                               |

|                                      |          |          |          |          |          |      |                                                                                                                                                                                                                                                                                   |
|--------------------------------------|----------|----------|----------|----------|----------|------|-----------------------------------------------------------------------------------------------------------------------------------------------------------------------------------------------------------------------------------------------------------------------------------|
|                                      |          |          |          |          |          |      | Flags: Precursor >E9CX44.1 RecName: Full=Heat-stable 19 kDa antigen; AltName: Full=Coccidioides-specific antigen; Short=CS antigen; Short=CS-AG; AltName: Full=Precipitin antigen; AltName: Full=TP-AG; Flags: Precursor && PF07249: Ceratoplatanin                               |
| Lachesis_group0__13_contigs__l.g7910 | 138.7579 | 3242.363 | -4.54679 | 0.000403 | 0.004795 | 1713 | - && P49374.1 RecName: Full=High-affinity glucose transporter && PF00083: Sugar (and other) transporter                                                                                                                                                                           |
| Lachesis_group0__13_contigs__l.g8423 | 19.40916 | 458.6174 | -4.57072 | 7.89E-11 | 3.76E-08 | 900  | - && Q9X248.1 RecName: Full=3-oxoacyl-[acyl-carrier-protein] reductase FabG; AltName: Full=3-ketoacyl-acyl carrier protein reductase; AltName: Full=Beta-Ketoacyl-acyl carrier protein reductase; AltName: Full=Beta-ketoacyl-ACP reductase && PF00106: short chain dehydrogenase |
| Lachesis_group0__13_contigs__l.g6349 | 76.0651  | 3017.569 | -5.31084 | 6.02E-25 | 3.30E-21 | 1521 | - && P0CP76.1 RecName: Full=Chitin deacetylase; Flags: Precursor && PF01522: Polysaccharide deacetylase                                                                                                                                                                           |

**Log<sub>2</sub>Fold change:** values of transcripts upregulated in BaP addition is represented by positive numbers and downregulated is represented by negative numbers.

Padj: adjust *P*-value

Table S3 Expression of genes in the Brij30\_BaP and BaP comparisons

| gene_id                              | Brij30_BaP | BaP      | log <sub>2</sub> FoldChange | Pvalue   | padj     | gene_length | gene_description                                                                                                                                                                                                                                                                                                                                                |
|--------------------------------------|------------|----------|-----------------------------|----------|----------|-------------|-----------------------------------------------------------------------------------------------------------------------------------------------------------------------------------------------------------------------------------------------------------------------------------------------------------------------------------------------------------------|
| Lachesis_group0__13_contigs__l.g7738 | 173.7051   | 10.5059  | 4.054323                    | 1.08E-09 | 1.13E-06 | 1077        | - && P73138.1 RecName: Full=S-(hydroxymethyl)glutathione dehydrogenase; AltName: Full=Alcohol dehydrogenase class-3; AltName: Full=Alcohol dehydrogenase class-III; AltName: Full=Glutathione-dependent formaldehyde dehydrogenase; Short=FALDH; Short=FDH; Short=GSH-FDH && PF00107:Zinc-binding dehydrogenase PF08240:Alcohol dehydrogenase GroES-like domain |
| Lachesis_group0__13_contigs__l.g768  | 16020.95   | 1131.03  | 3.824302                    | 0.000848 | 0.018173 | 1986        | - && - && PF00004:ATPase family associated with various cellular activities (AAA)                                                                                                                                                                                                                                                                               |
| Lachesis_group0__13_contigs__l.g6780 | 8137.322   | 718.9569 | 3.500657                    | 0.002805 | 0.036752 | 1959        | - && P30608.1 RecName: Full=Cytochrome P450 52A6; AltName: Full=Alkane-inducible P450-ALK3; AltName: Full=CYP11A6 && PF00067:Cytochrome P450                                                                                                                                                                                                                    |
| Lachesis_group0__13_contigs__l.g7729 | 2038.844   | 237.4297 | 3.102624                    | 4.26E-08 | 1.74E-05 | 1071        | - && G3XMC6.1 RecName: Full=Dehydrogenase azaJ; AltName: Full=Azaphilone biosynthesis cluster protein azaJ && PF08240:Alcohol dehydrogenase GroES-like domain PF00107:Zinc-binding dehydrogenase                                                                                                                                                                |
| Lachesis_group0__13_contigs__l.g2647 | 1880.057   | 235.9168 | 2.993938                    | 3.80E-06 | 0.000457 | 1212        | - && Q01752.1 RecName: Full=Aryl-alcohol dehydrogenase [NADP(+)]; Short=AAD && PF00248:Aldo/keto reductase family                                                                                                                                                                                                                                               |
| Lachesis_group0__13_contigs__l.g9966 | 975.586    | 134.8293 | 2.857095                    | 0.000105 | 0.004234 | 1728        | - && Q4P460.1 RecName: Full=Sulfate adenylyltransferase; AltName: Full=ATP-sulfurylase; AltName: Full=Sulfate adenylyl transferase; Short=SAT && PF01747:ATP-                                                                                                                                                                                                   |

|                                       |          |          |          |          |          |      |                                                                                                                                                                                                                                                                                         |
|---------------------------------------|----------|----------|----------|----------|----------|------|-----------------------------------------------------------------------------------------------------------------------------------------------------------------------------------------------------------------------------------------------------------------------------------------|
|                                       |          |          |          |          |          |      | sulfurylase PF01583:Adenylylsulphate kinase PF14306:PUA-like domain                                                                                                                                                                                                                     |
| Lachesis_group0__13_contigs__l.g1072  | 44148.61 | 6784.69  | 2.702037 | 5.89E-05 | 0.002888 | 1713 | - && P61871.1 RecName: Full=Lipase; AltName: Full=Lipase II; AltName: Full=RNL; AltName: Full=Triacylglycerol lipase; Flags: Precursor >P61872.1 RecName: Full=Lipase; AltName: Full=RDL; AltName: Full=Triacylglycerol lipase; Short=ROL; Flags: Precursor && PF01764:Lipase (class 3) |
| Lachesis_group0__13_contigs__l.g4059  | 141.9435 | 22.31177 | 2.672041 | 0.000517 | 0.012641 | 564  | - && - && PF07883:Cupin domain                                                                                                                                                                                                                                                          |
| Lachesis_group0__13_contigs__l.g8358  | 1221.006 | 195.8114 | 2.641597 | 2.13E-12 | 2.00E-08 | 1050 | - && Q91XV4.1 RecName: Full=L-xylulose reductase; Short=XR; AltName: Full=Dicarbonyl/L-xylulose reductase; AltName: Full=Sperm antigen P26h && PF00106:short chain dehydrogenase                                                                                                        |
| Lachesis_group0__13_contigs__l.g10346 | 12565.57 | 2087.793 | 2.589435 | 1.77E-05 | 0.001245 | 1302 | - && A8N4R7.1 RecName: Full=1,2-dihydroxy-3-keto-5-methylthiopentene dioxygenase 1; AltName: Full=Acireductone dioxygenase (Fe(2+)-requiring) 1; Short=ARD 1; Short=Fe-ARD 1 && PF03079:ARD/ARD' family                                                                                 |
| Lachesis_group0__13_contigs__l.g6791  | 5662.49  | 942.3104 | 2.587294 | 2.02E-05 | 0.001366 | 513  | - && Q9JIM4.1 RecName: Full=Dual specificity protein phosphatase 12; AltName: Full=Glucokinase-associated dual specificity phosphatase; Short=GKAP && PF00782:Dual specificity phosphatase, catalytic domain                                                                            |
| Lachesis_group0__13_contigs__l.g5413  | 14449.98 | 2405.909 | 2.586501 | 6.78E-07 | 0.000138 | 2343 | - && Q54CQ8.1 RecName: Full=von Willebrand factor A domain-containing protein DDB_G0292740 && PF13768: von Willebrand factor type A domain PF08487:Vault protein inter-alpha-trypsin domain                                                                                             |

|                                      |          |          |          |          |          |      |                                                                                                                                                                                                            |
|--------------------------------------|----------|----------|----------|----------|----------|------|------------------------------------------------------------------------------------------------------------------------------------------------------------------------------------------------------------|
| Lachesis_group0__13_contigs__l.g8098 | 2718.038 | 453.2877 | 2.584685 | 6.40E-07 | 0.000136 | 1320 | - && P17576.1 RecName: Full=Polyporopepsin; AltName: Full=Aspartic proteinase && PF00026:Eukaryotic aspartyl protease                                                                                      |
| Lachesis_group0__13_contigs__l.g535  | 1584.268 | 273.2121 | 2.535833 | 5.86E-06 | 0.00061  | 1350 | - && P23262.4 RecName: Full=Salicylate hydroxylase; AltName: Full=Salicylate 1-monooxygenase && PF01494:FAD binding domain                                                                                 |
| Lachesis_group0__13_contigs__l.g7176 | 3052.411 | 533.2226 | 2.517313 | 4.23E-06 | 0.000489 | 432  | - && - && PF01172:Shwachman-Bodian-Diamond syndrome (SBDS) protein                                                                                                                                         |
| Lachesis_group0__13_contigs__l.g7437 | 1850.367 | 329.7972 | 2.489178 | 1.56E-06 | 0.000239 | 948  | - && Q8NBN7.2 RecName: Full=Retinol dehydrogenase 13; AltName: Full=Short chain dehydrogenase/reductase family 7C member 3 && PF00106:short chain dehydrogenase                                            |
| Lachesis_group0__13_contigs__l.g7763 | 409.2854 | 74.88433 | 2.451825 | 0.001618 | 0.026804 | 1077 | - && O31186.1 RecName: Full=Alcohol dehydrogenase && PF08240:Alcohol dehydrogenase GroES-like domain PF00107:Zinc-binding dehydrogenase                                                                    |
| Lachesis_group0__13_contigs__l.g7223 | 20806.32 | 3841.214 | 2.437452 | 2.35E-07 | 6.88E-05 | 546  | - && P16934.1 RecName: Full=Fruiting body protein SC4; AltName: Full=Hydrophobin SC4; Flags: Precursor && PF01185:Fungal hydrophobin                                                                       |
| Lachesis_group0__13_contigs__l.g4839 | 1083.104 | 201.5215 | 2.426664 | 1.98E-05 | 0.001364 | 1125 | - && Q2HEW4.1 RecName: Full=Enoyl reductase CHGG_01240; AltName: Full=Chaetoglobosin biosynthesis protein CHGG_01240 && PF08240:Alcohol dehydrogenase GroES-like domain PF00107:Zinc-binding dehydrogenase |
| Lachesis_group0__13_contigs__l.g3748 | 9155.529 | 1728.08  | 2.405588 | 0.000698 | 0.015942 | 3198 | - && D4AUF1.1 RecName: Full=WSC domain-containing protein ARB_07867; Flags: Precursor && PF01822:WSC domain PF07250:Glyoxal oxidase N-terminus PF09118:Domain of unknown function (DUF1929)                |

|                                      |          |          |          |          |          |      |                                                                                                                                                                                                                                                                                                     |
|--------------------------------------|----------|----------|----------|----------|----------|------|-----------------------------------------------------------------------------------------------------------------------------------------------------------------------------------------------------------------------------------------------------------------------------------------------------|
| Lachesis_group0__13_contigs__l.g486  | 65152.14 | 12335.11 | 2.401054 | 0.000124 | 0.004784 | 1758 | - && Q54DY9.1 RecName: Full=Probable mitochondrial chaperone BCS1-B; AltName: Full=BCS1-like protein 2 && PF08740:BCS1 N terminal PF00004:ATPase family associated with various cellular activities (AAA)                                                                                           |
| Lachesis_group0__13_contigs__l.g794  | 5571.003 | 1062.278 | 2.390846 | 2.43E-05 | 0.001526 | 1977 | - && - && PF00004:ATPase family associated with various cellular activities (AAA)                                                                                                                                                                                                                   |
| Lachesis_group0__13_contigs__l.g7949 | 292.0375 | 58.13174 | 2.330649 | 0.000453 | 0.011527 | 1521 | - && A9JPE2.1 RecName: Full=Cytochrome P450 monooxygenase atmQ; AltName: Full=Aflatrem synthesis protein Q && PF00067:Cytochrome P450                                                                                                                                                               |
| Lachesis_group0__13_contigs__l.g1725 | 361.0781 | 72.99683 | 2.307705 | 0.000265 | 0.008193 | 1023 | - && Q09923.1 RecName: Full=Aldo-keto reductase yakc [NADP(+)] && PF00248:Aldo/keto reductase family                                                                                                                                                                                                |
| Lachesis_group0__13_contigs__l.g8360 | 543.5923 | 110.2198 | 2.300908 | 1.24E-05 | 0.000945 | 699  | - && Q6NUE2.1 RecName: Full=Carbonyl reductase family member 4; AltName: Full=3-ketoacyl-[acyl-carrier-protein] reductase beta subunit; Short=KAR beta subunit; AltName: Full=3-oxoacyl-[acyl-carrier-protein] reductase; AltName: Full=Quinone reductase CBR4 && PF00106:short chain dehydrogenase |
| Lachesis_group0__13_contigs__l.g4973 | 12945.71 | 2630.628 | 2.298986 | 0.001433 | 0.025468 | 741  | - && - && PF12766:Pyridoxamine 5'-phosphate oxidase                                                                                                                                                                                                                                                 |
| Lachesis_group0__13_contigs__l.g9130 | 917.0067 | 189.7129 | 2.273865 | 0.000226 | 0.00731  | 2238 | - && - && PF00350:Dynamain family                                                                                                                                                                                                                                                                   |
| Lachesis_group0__13_contigs__l.g717  | 2013.784 | 420.7029 | 2.259215 | 0.000274 | 0.008346 | 2310 | - && Q942X8.1 RecName: Full=Probable potassium transporter 2; AltName: Full=OsHAK2 && PF02705:K+ potassium transporter                                                                                                                                                                              |
| Lachesis_group0__13_contigs__l.g6878 | 1837.259 | 389.069  | 2.239615 | 0.000474 | 0.011894 | 1164 | - && O74750.1 RecName: Full=UDP-N-acetylglucosamine transporter yea4 && PF08449:UAA transporter family                                                                                                                                                                                              |



|                                       |          |          |          |          |          |      |                                                                                                                                                                                                                          |
|---------------------------------------|----------|----------|----------|----------|----------|------|--------------------------------------------------------------------------------------------------------------------------------------------------------------------------------------------------------------------------|
| Lachesis_group0__13_contigs__l.g7267  | 310.5116 | 65.95913 | 2.237097 | 0.003131 | 0.039577 | 1887 | - && P36619.2 RecName: Full=Leptomycin B resistance protein pmd1 && PF00005:ABC transporter                                                                                                                              |
| Lachesis_group0__13_contigs__l.g7222  | 6097.091 | 1300.382 | 2.229179 | 1.56E-05 | 0.001121 | 381  | - && P16934.1 RecName: Full=Fruiting body protein SC4; AltName: Full=Hydrophobin SC4; Flags: Precursor && PF01185:Fungal hydrophobin                                                                                     |
| Lachesis_group0__13_contigs__l.g10103 | 793.954  | 171.1841 | 2.213821 | 0.001622 | 0.026804 | 1041 | - && Q96NR8.3 RecName: Full=Retinol dehydrogenase 12; AltName: Full=All-trans and 9-cis retinol dehydrogenase; AltName: Full=Short chain dehydrogenase/reductase family 7C member 2 && PF00106:short chain dehydrogenase |
| Lachesis_group0__13_contigs__l.g1959  | 3139.465 | 700.4073 | 2.164323 | 1.08E-05 | 0.000909 | 873  | - && - && PF13419:Haloacid dehalogenase-like hydrolase                                                                                                                                                                   |
| Lachesis_group0__13_contigs__l.g10628 | 1553.061 | 348.039  | 2.158537 | 0.000197 | 0.006685 | 1728 | - && - && PF00026:Eukaryotic aspartyl protease                                                                                                                                                                           |
| Lachesis_group0__13_contigs__l.g9779  | 257.1282 | 59.6321  | 2.110118 | 0.00148  | 0.025764 | 3048 | - && Q9M3B4.1 RecName: Full=Protein ROOT INITIATION DEFECTIVE 3; AltName: Full=Root initiation defective 3 protein; AltName: Full=WD-40 repeat-containing protein RID3 && PF00400:WD domain, G-beta repeat               |
| Lachesis_group0__13_contigs__l.g530   | 2439.639 | 567.7317 | 2.10352  | 4.93E-05 | 0.002538 | 1044 | - && Q9UT59.1 RecName: Full=Putative uncharacterized oxidoreductase C513.07 && PF01370:NAD dependent epimerase/dehydratase family                                                                                        |
| Lachesis_group0__13_contigs__l.g582   | 5836.294 | 1360.479 | 2.101058 | 1.61E-07 | 5.02E-05 | 636  | - && - && PF05730:CFEM domain                                                                                                                                                                                            |
| Lachesis_group0__13_contigs__l.g3192  | 1099.135 | 260.6327 | 2.076545 | 0.004349 | 0.048845 | 789  | - && - && PF13302:Acetyltransferase (GNAT) domain                                                                                                                                                                        |
| Lachesis_group0__13_contigs__l.g3514  | 4145.831 | 1000.668 | 2.050922 | 0.000529 | 0.012805 | 1473 | - && Q6UEF1.1 RecName: Full=Oxidoreductase AflY; AltName: Full=Aflatoxin biosynthesis protein Y && PF14027:Protein of unknown function (DUF4243)                                                                         |

|                                       |          |          |          |          |          |      |                                                                                                                                                                                                                                         |
|---------------------------------------|----------|----------|----------|----------|----------|------|-----------------------------------------------------------------------------------------------------------------------------------------------------------------------------------------------------------------------------------------|
| Lachesis_group0__13_contigs__l.g446   | 430.1888 | 105.0372 | 2.036487 | 8.11E-06 | 0.000759 | 3243 | - && A0A0D2YG01.1 RecName: Full=Non-canonical non-ribosomal peptide synthetase FUB8; AltName: Full=Fusaric acid biosynthesis protein 8 && PF07993:Male sterility protein PF00501:AMP-binding enzyme                                     |
| Lachesis_group0__13_contigs__l.g8361  | 63.09911 | 15.56413 | 2.026889 | 0.003078 | 0.039124 | 1023 | - && - && PF01040:UbiA prenyltransferase family                                                                                                                                                                                         |
| Lachesis_group0__13_contigs__l.g9752  | 1716.527 | 438.1697 | 1.969969 | 0.001497 | 0.025804 | 375  | - && O95563.1 RecName: Full=Mitochondrial pyruvate carrier 2; AltName: Full=Brain protein 44 && PF03650:Uncharacterised protein family (UPF0041)                                                                                        |
| Lachesis_group0__13_contigs__l.g4508  | 258.4731 | 66.00924 | 1.969658 | 3.40E-05 | 0.001909 | 903  | - && - && PF05368:NmrA-like family                                                                                                                                                                                                      |
| Lachesis_group0__13_contigs__l.g3311  | 5908.554 | 1518.655 | 1.959915 | 3.96E-07 | 0.0001   | 3147 | - && Q9P6I2.2 RecName: Full=Cys-Gly metallodipeptidase dug1; AltName: Full=GSH degradosomal complex subunit DUG1 && PF07687:Peptidase dimerisation domain PF01546:Peptidase family M20/M25/M40 PF02666:Phosphatidylserine decarboxylase |
| Lachesis_group0__13_contigs__l.g5414  | 221.1733 | 57.98133 | 1.936282 | 2.83E-05 | 0.001647 | 2406 | - && Q54DU5.1 RecName: Full=von Willebrand factor A domain-containing protein DDB_G0292028 && PF13768:von Willebrand factor type A domain PF08487:Vault protein inter-alpha-trypsin domain                                              |
| Lachesis_group0__13_contigs__l.g9091  | 2283.594 | 602.1807 | 1.923424 | 5.58E-05 | 0.002753 | 1698 | - && P53388.1 RecName: Full=Dicarboxylic amino acid permease && PF00324:Amino acid permease                                                                                                                                             |
| Lachesis_group0__13_contigs__l.g8242  | 929.5056 | 248.4503 | 1.903556 | 0.000464 | 0.011739 | 1185 | - && - && PF00652:Ricin-type beta-trefoil lectin domain                                                                                                                                                                                 |
| Lachesis_group0__13_contigs__l.g11175 | 2543.749 | 682.5963 | 1.897984 | 0.001239 | 0.02326  | 1080 | - && - && PF13417:Glutathione S-transferase, N-terminal domain                                                                                                                                                                          |
| Lachesis_group0__13_contigs__l.g6456  | 149.8348 | 40.59661 | 1.890279 | 0.000895 | 0.01893  | 903  | - && - && PF08241:Methyltransferase domain                                                                                                                                                                                              |

|                                       |          |          |          |          |          |      |                                                                                                                                                                                                         |
|---------------------------------------|----------|----------|----------|----------|----------|------|---------------------------------------------------------------------------------------------------------------------------------------------------------------------------------------------------------|
| Lachesis_group0__13_contigs__l.g4498  | 19247.41 | 5212.87  | 1.884566 | 0.000268 | 0.008264 | 1056 | - && Q9USW3.1 RecName: Full=Probable glycosidase C21B10.07 && PF00722:Glycosyl hydrolases family 16                                                                                                     |
| Lachesis_group0__13_contigs__l.g3604  | 3738.334 | 1013.271 | 1.883656 | 0.000396 | 0.010569 | 1461 | - && P53322.1 RecName: Full=High-affinity nicotinic acid transporter; AltName: Full=Nicotinic acid permease && PF07690:Major Facilitator Superfamily                                                    |
| Lachesis_group0__13_contigs__l.g11667 | 791.3014 | 215.4133 | 1.877453 | 0.000524 | 0.01275  | 864  | - && Q5RDZ1.1 RecName: Full=Phenazine biosynthesis-like domain-containing protein && PF02567:Phenazine biosynthesis-like protein                                                                        |
| Lachesis_group0__13_contigs__l.g2474  | 1894.94  | 519.4323 | 1.867209 | 0.000163 | 0.005918 | 1764 | - && Q9FZ42.1 RecName: Full=Glucose and ribitol dehydrogenase homolog 1 && PF00106:short chain dehydrogenase                                                                                            |
| Lachesis_group0__13_contigs__l.g10211 | 2082.565 | 576.0918 | 1.854176 | 3.28E-05 | 0.00185  | 1995 | - && D2XV59.1 RecName: Full=GTP-binding protein 1 && PF03144:Elongation factor Tu domain 2 PF00009:Elongation factor Tu GTP binding domain                                                              |
| Lachesis_group0__13_contigs__l.g1372  | 7252.389 | 2020.777 | 1.8437   | 0.00042  | 0.011018 | 2001 | - && A2QEQ6.1 RecName: Full=Beta-glucuronidase; Short=GlcAase; AltName: Full=Beta-D-glucuronoside glucuronosohydrolase; Flags: Precursor && PF16862:Glycosyl hydrolase family 79 C-terminal beta domain |
| Lachesis_group0__13_contigs__l.g10952 | 654.7981 | 182.7954 | 1.841281 | 2.67E-05 | 0.001614 | 1830 | - && P87024.1 RecName: Full=Beta-glucan synthesis-associated protein SKN1 && PF03935:Beta-glucan synthesis-associated protein (SKN1)                                                                    |
| Lachesis_group0__13_contigs__l.g2225  | 4110.971 | 1147.217 | 1.841235 | 1.40E-06 | 0.000226 | 1257 | - && Q01752.1 RecName: Full=Aryl-alcohol dehydrogenase [NADP(+)]; Short=AAD && PF00248:Aldo/keto reductase family                                                                                       |
| Lachesis_group0__13_contigs__l.g7520  | 8117.967 | 2266.482 | 1.84081  | 1.15E-05 | 0.000919 | 2304 | - && P04842.2 RecName: Full=Alcohol oxidase 1; Short=AO 1; Short=AOX 1; AltName: Full=Methanol oxidase 1; Short=MOX 1 >F2QY27.1 RecName:                                                                |

|                                      |          |          |          |          |          |      |                                                                                                                                                                                                                                     |
|--------------------------------------|----------|----------|----------|----------|----------|------|-------------------------------------------------------------------------------------------------------------------------------------------------------------------------------------------------------------------------------------|
|                                      |          |          |          |          |          |      | Full=Alcohol oxidase 1; Short=AO 1; Short=AOX 1; AltName: Full=Methanol oxidase 1; Short=MOX 1 && PF00732:GMC oxidoreductase PF05199:GMC oxidoreductase                                                                             |
| Lachesis_group0__13_contigs__l.g1982 | 8706.871 | 2471.982 | 1.816473 | 0.0013   | 0.02406  | 330  | - && - && PF12585:Protein of unknown function (DUF3759)                                                                                                                                                                             |
| Lachesis_group0__13_contigs__l.g507  | 152.4613 | 43.67918 | 1.806962 | 0.000259 | 0.008054 | 1068 | - && Q12535.1 RecName: Full=Pectinesterase; Short=PE; AltName: Full=Pectin methylesterase; Flags: Precursor && PF01095:Pectinesterase                                                                                               |
| Lachesis_group0__13_contigs__l.g2190 | 3604.419 | 1032.799 | 1.803456 | 1.51E-05 | 0.001108 | 747  | - && - && PF04140:Isoprenylcysteine carboxyl methyltransferase (ICMT) family                                                                                                                                                        |
| Lachesis_group0__13_contigs__l.g6371 | 1770.668 | 507.5825 | 1.802879 | 0.00048  | 0.011978 | 1038 | - && O14295.1 RecName: Full=Pyridoxal reductase; Short=PL reductase; Short=PL-red && PF00248:Aldo/keto reductase family                                                                                                             |
| Lachesis_group0__13_contigs__l.g555  | 7746.631 | 2222.165 | 1.801698 | 2.98E-05 | 0.001701 | 2016 | - && O74977.1 RecName: Full=VMS1 homolog C1827.04 && -                                                                                                                                                                              |
| Lachesis_group0__13_contigs__l.g4086 | 742.3948 | 213.2045 | 1.799821 | 0.000481 | 0.011978 | 1626 | - && O42615.1 RecName: Full=Threonine dehydratase, mitochondrial; AltName: Full=Threonine deaminase; Flags: Precursor && PF00291:Pyridoxal-phosphate dependent enzyme PF00585:C-terminal regulatory domain of Threonine dehydratase |
| Lachesis_group0__13_contigs__l.g5415 | 19298.13 | 5556.654 | 1.796207 | 2.75E-05 | 0.001623 | 2916 | - && Q54CQ8.1 RecName: Full=von Willebrand factor A domain-containing protein DDB_G0292740 && PF13768:von Willebrand factor type A domain PF08487:Vault protein inter-alpha-trypsin domain                                          |

|                                       |          |          |          |          |          |      |                                                                                                                                                                                                                                                                                                                   |
|---------------------------------------|----------|----------|----------|----------|----------|------|-------------------------------------------------------------------------------------------------------------------------------------------------------------------------------------------------------------------------------------------------------------------------------------------------------------------|
| novel.1041                            | 448.7607 | 129.4594 | 1.79511  | 0.000178 | 0.006271 | 879  | - && P22579.2 RecName: Full=Transcriptional regulatory protein SIN3 && PF02671:Paired amphipathic helix repeat                                                                                                                                                                                                    |
| Lachesis_group0__13_contigs__l.g55    | 245.8673 | 71.3334  | 1.788022 | 0.000213 | 0.007079 | 1023 | - && P41838.1 RecName: Full=Poly(A)+ RNA export protein && -                                                                                                                                                                                                                                                      |
| Lachesis_group0__13_contigs__l.g3842  | 836.2325 | 243.5988 | 1.780337 | 6.54E-05 | 0.003093 | 1140 | - && - && PF00498:FHA domain                                                                                                                                                                                                                                                                                      |
| Lachesis_group0__13_contigs__l.g2470  | 21990.51 | 6408.846 | 1.778783 | 0.000522 | 0.012733 | 2205 | - && - && PF00004:ATPase family associated with various cellular activities (AAA)                                                                                                                                                                                                                                 |
| Lachesis_group0__13_contigs__l.g2540  | 193.2128 | 56.8084  | 1.768789 | 0.001611 | 0.026751 | 1722 | - && P59668.1 RecName: Full=Delta(12) fatty acid desaturase; AltName: Full=Delta-12 fatty acid desaturase && PF00487:Fatty acid desaturase                                                                                                                                                                        |
| Lachesis_group0__13_contigs__l.g2924  | 122.9251 | 36.19256 | 1.76651  | 0.000355 | 0.009881 | 1719 | - && - && PF15496:Domain of unknown function (DUF4646)                                                                                                                                                                                                                                                            |
| Lachesis_group0__13_contigs__l.g11363 | 4341.201 | 1276.493 | 1.766044 | 0.000584 | 0.013782 | 2277 | - && Q9H4L5.1 RecName: Full=Oxysterol-binding protein-related protein 3; Short=ORP-3; Short=OSBP-related protein 3 && PF15409:Pleckstrin homology domain PF01237:Oxysterol-binding protein                                                                                                                        |
| Lachesis_group0__13_contigs__l.g1862  | 417.2754 | 122.7962 | 1.763845 | 0.000364 | 0.01003  | 1551 | - && Q0CJ57.1 RecName: Full=Cytochrome P450 monooxygenase atE; AltName: Full=Terreic acid biosynthesis cluster protein E && PF00067:Cytochrome P450                                                                                                                                                               |
| Lachesis_group0__13_contigs__l.g10095 | 9545.905 | 2829.227 | 1.754587 | 2.07E-05 | 0.001387 | 5748 | - && P78811.2 RecName: Full=Probable UTP--glucose-1-phosphate uridylyltransferase; AltName: Full=UDP-glucose pyrophosphorylase; Short=UDPGP; Short=UGPase && PF08797:HIRAN domain PF00176:SNF2 family N-terminal domain PF00645:Poly(ADP-ribose) polymerase and DNA-Ligase Zn-finger region PF01704:UTP--glucose- |

|                                      |          |          |          |          |          |      |                                                                                                                                                                                                                                                                                                                                                                 |
|--------------------------------------|----------|----------|----------|----------|----------|------|-----------------------------------------------------------------------------------------------------------------------------------------------------------------------------------------------------------------------------------------------------------------------------------------------------------------------------------------------------------------|
|                                      |          |          |          |          |          |      | 1-phosphate uridylyltransferase PF00271:Helicase conserved C-terminal domain                                                                                                                                                                                                                                                                                    |
| Lachesis_group0__13_contigs__l.g4841 | 58.32864 | 17.37448 | 1.752169 | 0.001601 | 0.026693 | 978  | - && Q8J0F9.1 RecName: Full=Deshydrogenase mlcG; AltName: Full=Compactin biosynthesis protein G; AltName: Full=Enoyl reductase && PF08240:Alcohol dehydrogenase GroES-like domain PF00107:Zinc-binding dehydrogenase                                                                                                                                            |
| Lachesis_group0__13_contigs__l.g6062 | 400.0581 | 119.2886 | 1.746229 | 0.003863 | 0.045231 | 837  | - && Q7SDM8.1 RecName: Full=tRNA(His) guanylyltransferase; AltName: Full=tRNA-histidine guanylyltransferase && PF14413:Thg1 C terminal domain PF04446:tRNAHis guanylyltransferase                                                                                                                                                                               |
| Lachesis_group0__13_contigs__l.g4840 | 2528.555 | 755.3666 | 1.743229 | 9.43E-06 | 0.000842 | 1068 | - && Q8FKG1.1 RecName: Full=S-(hydroxymethyl)glutathione dehydrogenase; AltName: Full=Alcohol dehydrogenase class-3; AltName: Full=Alcohol dehydrogenase class-III; AltName: Full=Glutathione-dependent formaldehyde dehydrogenase; Short=FALDH; Short=FDH; Short=GSH-FDH && PF00107:Zinc-binding dehydrogenase PF08240:Alcohol dehydrogenase GroES-like domain |
| Lachesis_group0__13_contigs__l.g2205 | 7151.252 | 2144.38  | 1.737713 | 0.000114 | 0.004565 | 3927 | - && B0D4J6.1 RecName: Full=Ubiquitin-related modifier 1 && PF09138:Urm1 (Ubiquitin related modifier)                                                                                                                                                                                                                                                           |
| Lachesis_group0__13_contigs__l.g599  | 574.5892 | 172.8303 | 1.734238 | 0.002563 | 0.034887 | 765  | - && O14283.2 RecName: Full=Transcription factor prr1; AltName: Full=Pombe response regulator 1 && PF00447:HSF-type DNA-binding                                                                                                                                                                                                                                 |

|                                      |          |          |          |          |          |      |                                                                                                                                                                                                                                                                                                                                                                                                                                                                                                                                                                             |
|--------------------------------------|----------|----------|----------|----------|----------|------|-----------------------------------------------------------------------------------------------------------------------------------------------------------------------------------------------------------------------------------------------------------------------------------------------------------------------------------------------------------------------------------------------------------------------------------------------------------------------------------------------------------------------------------------------------------------------------|
| Lachesis_group0__13_contigs__l.g2538 | 228.2252 | 68.95698 | 1.728332 | 0.001791 | 0.028386 | 1524 | - && A1DA63.1 RecName: Full=Fumitremorgin C synthase; AltName: Full=Fumitremorgin biosynthesis protein E && PF00067:Cytochrome P450                                                                                                                                                                                                                                                                                                                                                                                                                                         |
| Lachesis_group0__13_contigs__l.g4879 | 17845.05 | 5431.546 | 1.716086 | 0.000169 | 0.006029 | 738  | - && O94476.1 RecName: Full=Eukaryotic translation initiation factor 6; Short=eIF-6 && PF01912:eIF-6 family                                                                                                                                                                                                                                                                                                                                                                                                                                                                 |
| Lachesis_group0__13_contigs__l.g3853 | 66.08031 | 20.10123 | 1.715627 | 0.001971 | 0.030218 | 435  | - && P16933.2 RecName: Full=Fruiting body protein SC3; AltName: Full=Hydrophobin SC3; Flags: Precursor && PF01185:Fungal hydrophobin                                                                                                                                                                                                                                                                                                                                                                                                                                        |
| Lachesis_group0__13_contigs__l.g3567 | 508.6763 | 155.0722 | 1.71514  | 0.00147  | 0.025764 | 915  | - && A8NWP2.2 RecName: Full=NAD-dependent protein deacylase; AltName: Full=Regulatory protein SIR2 homolog 5; Flags: Precursor && PF02146:Sir2 family                                                                                                                                                                                                                                                                                                                                                                                                                       |
| Lachesis_group0__13_contigs__l.g6866 | 167.8294 | 51.47132 | 1.703842 | 5.40E-05 | 0.002692 | 1893 | - && - && PF13578:Methyltransferase domain PF01501:Glycosyl transferase family 8                                                                                                                                                                                                                                                                                                                                                                                                                                                                                            |
| Lachesis_group0__13_contigs__l.g258  | 663.7079 | 203.8254 | 1.703747 | 0.001151 | 0.022282 | 4773 | - && Q06625.1 RecName: Full=Glycogen debranching enzyme; AltName: Full=Glycogen debrancher; Includes: RecName: Full=4-alpha-glucanotransferase; AltName: Full=Oligo-1,4-1,4-glucantransferase; Includes: RecName: Full=Amylo-alpha-1,6-glucosidase; Short=Amylo-1,6-glucosidase; AltName: Full=Dextrin 6-alpha-D-glucosidase && PF06202:Amylo-alpha-1,6-glucosidase PF14701:glucanotransferase domain of human glycogen debranching enzyme PF14699:N-terminal domain from the human glycogen debranching enzyme PF14702:central domain of human glycogen debranching enzyme |
| Lachesis_group0__13_contigs__l.g2907 | 456.543  | 141.7147 | 1.688877 | 0.000366 | 0.01003  | 1653 | - && - && PF00011:Hsp20/alpha crystallin family                                                                                                                                                                                                                                                                                                                                                                                                                                                                                                                             |

|                                      |          |          |          |          |          |      |                                                                                                                                                                                                                                                                                                     |
|--------------------------------------|----------|----------|----------|----------|----------|------|-----------------------------------------------------------------------------------------------------------------------------------------------------------------------------------------------------------------------------------------------------------------------------------------------------|
| Lachesis_group0__13_contigs__l.g2713 | 920.7412 | 285.6345 | 1.688334 | 0.002976 | 0.038348 | 738  | - && Q6P0H7.1 RecName: Full=Carbonyl reductase family member 4; AltName: Full=3-ketoacyl-[acyl-carrier-protein] reductase beta subunit; Short=KAR beta subunit; AltName: Full=3-oxoacyl-[acyl-carrier-protein] reductase; AltName: Full=Quinone reductase CBR4 && PF00106:short chain dehydrogenase |
| Lachesis_group0__13_contigs__l.g1113 | 7045.346 | 2188.058 | 1.686979 | 0.002296 | 0.032895 | 1857 | - && Q2H XK9.2 RecName: Full=Respiratory burst oxidase homolog protein D; AltName: Full=NADPH oxidase RBOHD; AltName: Full=StRBOHD && PF08030:Ferric reductase NAD binding domain PF01794:Ferric reductase like transmembrane component PF08022:FAD-binding domain                                  |
| Lachesis_group0__13_contigs__l.g3790 | 31176.93 | 9717.71  | 1.68182  | 0.002418 | 0.033962 | 2958 | - && - && PF13632:Glycosyl transferase family group 2                                                                                                                                                                                                                                               |
| Lachesis_group0__13_contigs__l.g1802 | 1166.277 | 363.6254 | 1.681063 | 0.001369 | 0.024857 | 1833 | - && Q9U9A3.2 RecName: Full=Serine/threonine-protein phosphatase 6 catalytic subunit; Short=PP6C && PF00248:Aldo/keto reductase family                                                                                                                                                              |
| Lachesis_group0__13_contigs__l.g8366 | 81158.93 | 25505.34 | 1.669951 | 0.001962 | 0.030126 | 1593 | - && P16934.1 RecName: Full=Fruiting body protein SC4; AltName: Full=Hydrophobin SC4; Flags: Precursor && PF01185:Fungal hydrophobin                                                                                                                                                                |
| Lachesis_group0__13_contigs__l.g4932 | 96.7143  | 31.46505 | 1.620757 | 0.001547 | 0.026227 | 1347 | - && - && PF00069:Protein kinase domain                                                                                                                                                                                                                                                             |
| Lachesis_group0__13_contigs__l.g2537 | 271.9026 | 88.43091 | 1.618773 | 0.001328 | 0.024348 | 1293 | - && P59668.1 RecName: Full=Delta(12) fatty acid desaturase; AltName: Full=Delta-12 fatty acid desaturase && PF00487:Fatty acid desaturase                                                                                                                                                          |
| Lachesis_group0__13_contigs__l.g3569 | 667.9259 | 219.1908 | 1.607548 | 0.001155 | 0.022308 | 3426 | - && P34422.2 RecName: Full=Dipeptidyl peptidase family member 6 && PF00326:Prolyl oligopeptidase family                                                                                                                                                                                            |



|                                      |          |          |          |          |          |      |                                                                                                                                                                                                                                                                           |
|--------------------------------------|----------|----------|----------|----------|----------|------|---------------------------------------------------------------------------------------------------------------------------------------------------------------------------------------------------------------------------------------------------------------------------|
| Lachesis_group0__13_contigs__l.g2204 | 45765.6  | 15031.17 | 1.606327 | 0.001729 | 0.027854 | 1914 | - && P39992.1 RecName: Full=Uncharacterized protein YEL023C && PF09994:Uncharacterized alpha/beta hydrolase domain (DUF2235)                                                                                                                                              |
| Lachesis_group0__13_contigs__l.g1471 | 1206.828 | 396.6718 | 1.605553 | 0.00074  | 0.016493 | 1383 | - && - && PF00107:Zinc-binding dehydrogenase PF16884:N-terminal domain of oxidoreductase                                                                                                                                                                                  |
| Lachesis_group0__13_contigs__l.g2917 | 288.1901 | 95.36379 | 1.596704 | 0.001621 | 0.026804 | 510  | - && P22579.2 RecName: Full=Transcriptional regulatory protein SIN3 && PF02671:Paired amphipathic helix repeat                                                                                                                                                            |
| Lachesis_group0__13_contigs__l.g856  | 2480.835 | 821.4314 | 1.59492  | 0.000704 | 0.016047 | 2412 | - && Q09922.1 RecName: Full=Uncharacterized transcriptional regulatory protein C1F7.11c && PF04082:Fungal specific transcription factor domain                                                                                                                            |
| Lachesis_group0__13_contigs__l.g2322 | 687.0362 | 228.7593 | 1.586476 | 0.00217  | 0.031913 | 915  | - && I7LRH3.1 RecName: Full=Cytochrome P450 monooxygenase mpaDE; AltName: Full=Mycophenolic acid synthesis fusion protein DE; Flags: Precursor && PF00753:Metallo-beta-lactamase superfamily                                                                              |
| Lachesis_group0__13_contigs__l.g1677 | 31744.77 | 10605.1  | 1.581777 | 7.00E-06 | 0.000698 | 468  | - && - && PF16850:Peptidase inhibitor I66                                                                                                                                                                                                                                 |
| Lachesis_group0__13_contigs__l.g5973 | 6578.61  | 2207.604 | 1.575305 | 3.71E-05 | 0.00203  | 3084 | - && Q9ZVH4.1 RecName: Full=Cullin-3A; Short=AtCUL3a && PF13417:Glutathione S-transferase, N-terminal domain PF00888:Cullin family PF10557:Cullin protein neddylation domain                                                                                              |
| Lachesis_group0__13_contigs__l.g7966 | 287.2603 | 96.5396  | 1.57455  | 0.000956 | 0.019774 | 2697 | - && Q13546.3 RecName: Full=Receptor-interacting serine/threonine-protein kinase 1; AltName: Full=Cell death protein RIP; AltName: Full=Receptor-interacting protein 1; Short=RIP-1; AltName: Full=Serine/threonine-protein kinase RIP && PF07714:Protein tyrosine kinase |

|                                      |          |          |          |          |          |      |                                                                                                                                                                                                                                                                                                                                                                                                                                                         |
|--------------------------------------|----------|----------|----------|----------|----------|------|---------------------------------------------------------------------------------------------------------------------------------------------------------------------------------------------------------------------------------------------------------------------------------------------------------------------------------------------------------------------------------------------------------------------------------------------------------|
| Lachesis_group0__13_contigs__l.g8875 | 620.9468 | 208.7047 | 1.573673 | 4.27E-05 | 0.002328 | 1626 | - && Q06402.1 RecName: Full=1-aminocyclopropane-1-carboxylate synthase 2; Short=ACC synthase 2; AltName: Full=S-adenosyl-L-methionine methylthioadenosine-lyase 2 && PF00155:Aminotransferase class I and II                                                                                                                                                                                                                                            |
| Lachesis_group0__13_contigs__l.g8542 | 514.496  | 174.4196 | 1.561811 | 0.000279 | 0.008463 | 2796 | - && Q9QZ81.2 RecName: Full=Protein argonaute-2; Short=Argonaute2; AltName: Full=Argonaute RISC catalytic component 2; AltName: Full=Eukaryotic translation initiation factor 2C 2; Short=eIF-2C 2; Short=eIF2C 2; AltName: Full=Golgi ER protein 95 kDa; Short=GERp95; AltName: Full=Protein slicer && PF16486:N-terminal domain of argonaute PF16487:Mid domain of argonaute PF02171:Piwi domain PF08699:Argonaute linker 1 domain PF02170:PAZ domain |
| Lachesis_group0__13_contigs__l.g541  | 1811.531 | 614.352  | 1.560374 | 0.000734 | 0.016402 | 2256 | - && O74396.3 RecName: Full=Vacuolar protein sorting-associated protein 9a; AltName: Full=Vacuolar protein-targeting protein 9a && PF02204:Vacuolar sorting protein 9 (VPS9) domain PF02845:CUE domain                                                                                                                                                                                                                                                  |
| Lachesis_group0__13_contigs__l.g7421 | 5864.95  | 2005.113 | 1.548561 | 0.001844 | 0.028895 | 408  | - && Q91W82.1 RecName: Full=Ubiquitin-conjugating enzyme E2 E2; AltName: Full=E2 ubiquitin-conjugating enzyme E2; AltName: Full=Ubiquitin carrier protein E2; AltName: Full=Ubiquitin-protein ligase E2 && PF00179:Ubiquitin-conjugating enzyme                                                                                                                                                                                                         |
| Lachesis_group0__13_contigs__l.g8166 | 221.3645 | 75.88143 | 1.546374 | 0.000904 | 0.018959 | 714  | - && O94628.1 RecName: Full=Uncharacterized methyltransferase C1347.09 && PF13489:Methyltransferase domain                                                                                                                                                                                                                                                                                                                                              |

|                                       |          |          |          |          |          |      |                                                                                                                                                                                                                                                                                                                                                      |
|---------------------------------------|----------|----------|----------|----------|----------|------|------------------------------------------------------------------------------------------------------------------------------------------------------------------------------------------------------------------------------------------------------------------------------------------------------------------------------------------------------|
| Lachesis_group0__13_contigs__l.g485   | 1794.125 | 615.2175 | 1.544504 | 0.004267 | 0.04834  | 732  | - && Q9C2M6.1 RecName: Full=Putative dolichyldiphosphatase; AltName: Full=Dolichyl pyrophosphate phosphatase && PF01569:PAP2 superfamily                                                                                                                                                                                                             |
| Lachesis_group0__13_contigs__l.g10938 | 1182.977 | 406.5832 | 1.541035 | 0.001662 | 0.027129 | 9411 | - && Q9P7V2.1 RecName: Full=ATP-binding cassette transporter abc4; Short=ABC transporter abc4; AltName: Full=ATP-energized glutathione S-conjugate pump abc4; AltName: Full=Glutathione S-conjugate-transporting ATPase abc4 && PF00664:ABC transporter transmembrane region PF00005:ABC transporter                                                 |
| Lachesis_group0__13_contigs__l.g8840  | 683.3567 | 235.5304 | 1.537026 | 3.82E-06 | 0.000457 | 537  | - && Q5I0K7.1 RecName: Full=UDP-N-acetylglucosamine transferase subunit ALG13 homolog; AltName: Full=Glycosyltransferase 28 domain-containing protein 1 && PF04101:Glycosyltransferase family 28 C-terminal domain                                                                                                                                   |
| Lachesis_group0__13_contigs__l.g4512  | 655.7518 | 226.944  | 1.532068 | 0.002547 | 0.034806 | 1791 | - && Q9SYK0.1 RecName: Full=Beta-hexosaminidase 2; AltName: Full=Beta-GlcNAcase 2; AltName: Full=Beta-N-acetylhexosaminidase 2; AltName: Full=Beta-hexosaminidase 3; Short=AtHEX3; AltName: Full=N-acetyl-beta-glucosaminidase 2; Flags: Precursor && PF00728:Glycosyl hydrolase family 20, catalytic domain PF14845:beta-acetyl hexosaminidase like |
| Lachesis_group0__13_contigs__l.g8128  | 5641.382 | 1961.498 | 1.524138 | 0.002897 | 0.037553 | 1020 | - && Q8CG76.3 RecName: Full=Aflatoxin B1 aldehyde reductase member 2; AltName: Full=Succinic semialdehyde reductase; Short=SSA reductase && PF00248:Aldo/keto reductase family                                                                                                                                                                       |

|                                       |          |          |          |          |          |      |                                                                                                                                                                                                                                                                     |
|---------------------------------------|----------|----------|----------|----------|----------|------|---------------------------------------------------------------------------------------------------------------------------------------------------------------------------------------------------------------------------------------------------------------------|
| Lachesis_group0__13_contigs__l.g3608  | 29725.56 | 10426.54 | 1.511452 | 0.001497 | 0.025804 | 2283 | - && - && PF11443:Domain of unknown function (DUF2828)                                                                                                                                                                                                              |
| Lachesis_group0__13_contigs__l.g147   | 1011.06  | 357.7212 | 1.498888 | 0.000437 | 0.011312 | 1377 | - && Q9UT44.1 RecName: Full=Probable gamma-glutamyl phosphate reductase; Short=GPR; AltName: Full=Glutamate-5-semialdehyde dehydrogenase; Short=GSA dehydrogenase; AltName: Full=Glutamyl-gamma-semialdehyde dehydrogenase && PF00171:Aldehyde dehydrogenase family |
| Lachesis_group0__13_contigs__l.g2505  | 7118.971 | 2523.367 | 1.496319 | 0.000132 | 0.005006 | 1947 | - && - && PF01565:FAD binding domain                                                                                                                                                                                                                                |
| Lachesis_group0__13_contigs__l.g5496  | 767.823  | 274.5737 | 1.484545 | 0.001824 | 0.028623 | 1872 | - && Q06466.1 RecName: Full=Putative vacuolar protein sorting-associated protein TDA6; AltName: Full=Topoisomerase I damage affected protein 6 && PF06101:Plant protein of unknown function (DUF946)                                                                |
| Lachesis_group0__13_contigs__l.g5110  | 19611.89 | 7028.303 | 1.480492 | 0.001365 | 0.024825 | 744  | - && - && PF13430:Domain of unknown function (DUF4112)                                                                                                                                                                                                              |
| Lachesis_group0__13_contigs__l.g10443 | 658.2803 | 236.4358 | 1.47797  | 0.003506 | 0.042972 | 1341 | - && Q53552.1 RecName: Full=Salicylate hydroxylase; AltName: Full=Salicylate 1-monooxygenase && PF01494:FAD binding domain                                                                                                                                          |
| Lachesis_group0__13_contigs__l.g11592 | 4229.839 | 1533.046 | 1.464186 | 0.000135 | 0.005071 | 1065 | - && Q550W6.1 RecName: Full=GDP-fucose transporter 1; AltName: Full=Solute carrier family 35 member C1 homolog && PF03151:Triose-phosphate Transporter family                                                                                                       |
| Lachesis_group0__13_contigs__l.g10094 | 2186.274 | 803.4076 | 1.444667 | 0.001752 | 0.027915 | 1629 | - && - && PF00149:Calcineurin-like phosphoesterase                                                                                                                                                                                                                  |
| Lachesis_group0__13_contigs__l.g11223 | 1320.163 | 493.3524 | 1.420653 | 0.000388 | 0.010428 | 3888 | - && Q9M8Y0.1 RecName: Full=Probable UDP-N-acetylglucosamine--peptide N-acetylglucosaminyltransferase SEC; AltName: Full=Protein SECRET AGENT && PF13844:Glycosyl transferase family 41   PF13424:Tetratricopeptide repeat                                          |

|                                      |          |          |          |          |          |      |                                                                                                                                                         |
|--------------------------------------|----------|----------|----------|----------|----------|------|---------------------------------------------------------------------------------------------------------------------------------------------------------|
| Lachesis_group0__13_contigs__l.g5202 | 2302.77  | 870.865  | 1.403104 | 0.000125 | 0.004784 | 1689 | - && - && PF01435:Peptidase family M48                                                                                                                  |
| Lachesis_group0__13_contigs__l.g9601 | 412.9007 | 156.3878 | 1.401658 | 0.000716 | 0.016088 | 765  | - && O74758.1 RecName: Full=Uncharacterized protein C17D11.03c && -                                                                                     |
| Lachesis_group0__13_contigs__l.g7235 | 282.218  | 107.512  | 1.393711 | 0.000477 | 0.011953 | 741  | - && - && PF09747:Coiled-coil domain containing protein (DUF2052)                                                                                       |
| Lachesis_group0__13_contigs__l.g9610 | 6049.729 | 2321.969 | 1.38151  | 0.000101 | 0.004143 | 1476 | - && Q9US44.1 RecName: Full=Uncharacterized transporter C1002.16c && PF07690:Major Facilitator Superfamily                                              |
| Lachesis_group0__13_contigs__l.g1329 | 227.5635 | 88.47321 | 1.365689 | 0.003476 | 0.042856 | 1680 | - && - && PF01728:FtsJ-like methyltransferase                                                                                                           |
| Lachesis_group0__13_contigs__l.g8732 | 526.9703 | 204.5751 | 1.364749 | 0.003169 | 0.039954 | 1620 | - && Q04792.1 RecName: Full=Glutamate decarboxylase; Short=GAD && PF00282:Pyridoxal-dependent decarboxylase conserved domain                            |
| Lachesis_group0__13_contigs__l.g2640 | 146.1599 | 57.45716 | 1.35097  | 0.003419 | 0.042426 | 1311 | - && A5H0J3.1 RecName: Full=Uracil catabolism protein 4; AltName: Full=Pyrimidine-degrading protein 14 && PF07958:Protein of unknown function (DUF1688) |
| Lachesis_group0__13_contigs__l.g3191 | 119.6982 | 47.10623 | 1.3478   | 0.002662 | 0.035682 | 789  | - && - && PF13302:Acetyltransferase (GNAT) domain                                                                                                       |
| Lachesis_group0__13_contigs__l.g9855 | 18954.21 | 7473.795 | 1.342579 | 0.00218  | 0.031964 | 366  | - && P16934.1 RecName: Full= fruiting body protein SC4; AltName: Full=Hydrophobin SC4; Flags: Precursor && PF01185:Fungal hydrophobin                   |
| Lachesis_group0__13_contigs__l.g7796 | 6127.37  | 2425.136 | 1.337295 | 0.003072 | 0.03912  | 1215 | - && Q58EJ9.1 RecName: Full=Mitochondrial amidoxime-reducing component 1; Short=mARC1 && PF03476:MOSC N-terminal beta barrel domain PF03473:MOSC domain |
| Lachesis_group0__13_contigs__l.g6455 | 1348.31  | 534.2622 | 1.335436 | 0.002233 | 0.032381 | 1674 | - && - && PF02458:Transferase family                                                                                                                    |
| Lachesis_group0__13_contigs__l.g376  | 736.4146 | 291.9576 | 1.334832 | 6.49E-05 | 0.003084 | 822  | - && - && PF10021:Uncharacterized protein conserved in bacteria (DUF2263)                                                                               |

|                                      |          |          |          |          |          |      |                                                                                                                                                                                                                                                                                                                                                                         |
|--------------------------------------|----------|----------|----------|----------|----------|------|-------------------------------------------------------------------------------------------------------------------------------------------------------------------------------------------------------------------------------------------------------------------------------------------------------------------------------------------------------------------------|
| Lachesis_group0__13_contigs__l.g8641 | 2724.832 | 1082.337 | 1.332304 | 0.003733 | 0.04416  | 2319 | - && Q8VDZ4.1 RecName: Full=Palmitoyltransferase ZDHHC5; AltName: Full=Zinc finger DHHC domain-containing protein 5; Short=DHHC-5 && PF01529:DHHC palmitoyltransferase                                                                                                                                                                                                  |
| Lachesis_group0__13_contigs__l.g9566 | 9368.621 | 3798.611 | 1.302358 | 0.003305 | 0.041279 | 4569 | - && B0D360.1 RecName: Full=Adenylate kinase; AltName: Full=ATP-AMP transphosphorylase; AltName: Full=ATP:AMP phosphotransferase; AltName: Full=Adenylate kinase cytosolic and mitochondrial; AltName: Full=Adenylate monophosphate kinase && PF00005:ABC transporter PF05191:Adenylate kinase, active site lid PF00406:Adenylate kinase PF01061:ABC-2 type transporter |
| Lachesis_group0__13_contigs__l.g2028 | 1568.703 | 639.4038 | 1.295214 | 0.002039 | 0.030999 | 4899 | - && Q9P7V2.1 RecName: Full=ATP-binding cassette transporter abc4; Short=ABC transporter abc4; AltName: Full=ATP-energized glutathione S-conjugate pump abc4; AltName: Full=Glutathione S-conjugate-transporting ATPase abc4 && PF00005:ABC transporter PF00664:ABC transporter transmembrane region                                                                    |
| Lachesis_group0__13_contigs__l.g4392 | 1955.92  | 802.2756 | 1.285628 | 0.000247 | 0.00784  | 1056 | - && Q9V3D2.1 RecName: Full=Oxygen-dependent coproporphyrinogen-III oxidase; Short=COX; Short=Coprogen oxidase; Short=Coproporphyrinogenase && PF01218:Coproporphyrinogen III oxidase                                                                                                                                                                                   |
| Lachesis_group0__13_contigs__l.g9965 | 1183.545 | 487.5326 | 1.27976  | 0.002501 | 0.0343   | 1008 | - && Q09923.1 RecName: Full=Aldo-keto reductase yakc [NADP(+)] && PF00248:Aldo/keto reductase family                                                                                                                                                                                                                                                                    |

|                                       |          |          |          |          |          |      |                                                                                                                                                                                                                                                                                                                                                                                                                  |
|---------------------------------------|----------|----------|----------|----------|----------|------|------------------------------------------------------------------------------------------------------------------------------------------------------------------------------------------------------------------------------------------------------------------------------------------------------------------------------------------------------------------------------------------------------------------|
| Lachesis_group0__13_contigs__l.g2107  | 1126.072 | 467.4024 | 1.269104 | 0.000628 | 0.014635 | 1377 | - && Q9VVU5.1 RecName: Full=COP9 signalosome complex subunit 1b; Short=Dch1-2; Short=Signalosome subunit 1b && PF10602:26S proteasome subunit RPN7 PF01399:PCI domain                                                                                                                                                                                                                                            |
| Lachesis_group0__13_contigs__l.g11144 | 2466.188 | 1025.713 | 1.265755 | 0.0032   | 0.040242 | 2019 | - && Q6MG06.1 RecName: Full=Guanine nucleotide-binding protein-like 1 && PF01926:50S ribosome-binding GTPase                                                                                                                                                                                                                                                                                                     |
| Lachesis_group0__13_contigs__l.g4543  | 964.4284 | 401.7545 | 1.263607 | 0.001509 | 0.025804 | 3582 | - && Q0CL79.2 RecName: Full=Cytokinesis protein sepH; AltName: Full=Serine/threonine-protein kinase sepH && PF00069:Protein kinase domain                                                                                                                                                                                                                                                                        |
| Lachesis_group0__13_contigs__l.g1803  | 470.2406 | 198.7196 | 1.242669 | 0.000369 | 0.01003  | 1038 | - && B9WYE6.1 RecName: Full=Versiconal hemiacetal acetate reductase; AltName: Full=VHA reductase && PF00248:Aldo/keto reductase family                                                                                                                                                                                                                                                                           |
| Lachesis_group0__13_contigs__l.g10325 | 3907.411 | 1652.629 | 1.241567 | 0.001316 | 0.024267 | 2175 | - && P0CQ68.1 RecName: Full=Protein arginine N-methyltransferase 2; AltName: Full=Protein-arginine N5-methyltransferase; AltName: Full=Type IV protein arginine N-methyltransferase; Short=Type IV PRMT >P0CQ69.1 RecName: Full=Protein arginine N-methyltransferase 2; AltName: Full=Protein-arginine N5-methyltransferase; AltName: Full=Type IV protein arginine N-methyltransferase; Short=Type IV PRMT && - |
| Lachesis_group0__13_contigs__l.g8171  | 78253.96 | 33147.85 | 1.239256 | 0.002079 | 0.031115 | 1608 | - && P39992.1 RecName: Full=Uncharacterized protein YEL023C && PF09994:Uncharacterized alpha/beta hydrolase domain (DUF2235)                                                                                                                                                                                                                                                                                     |
| Lachesis_group0__13_contigs__l.g2596  | 215.1004 | 91.47127 | 1.234754 | 0.001087 | 0.021612 | 1221 | - && P32386.2 RecName: Full=ATP-dependent bile acid permease && PF00005:ABC transporter                                                                                                                                                                                                                                                                                                                          |

|                                       |          |          |          |          |          |      |                                                                                                                                                                                                                                                                                                                                  |
|---------------------------------------|----------|----------|----------|----------|----------|------|----------------------------------------------------------------------------------------------------------------------------------------------------------------------------------------------------------------------------------------------------------------------------------------------------------------------------------|
| Lachesis_group0__13_contigs__l.g9370  | 31015.55 | 13245.25 | 1.227524 | 0.000252 | 0.007951 | 1314 | - && Q6FJN0.1 RecName: Full=Multiprotein-bridging factor 1 && PF01381:Helix-turn-helix PF08523:Multiprotein bridging factor 1                                                                                                                                                                                                    |
| Lachesis_group0__13_contigs__l.g3898  | 4812.054 | 2062.566 | 1.222269 | 0.003996 | 0.045892 | 2256 | - && - && PF11901:Protein of unknown function (DUF3421) PF00561:alpha/beta hydrolase fold                                                                                                                                                                                                                                        |
| Lachesis_group0__13_contigs__l.g2327  | 1845.028 | 793.1559 | 1.218082 | 0.001477 | 0.025764 | 858  | - && - && PF01424:R3H domain                                                                                                                                                                                                                                                                                                     |
| Lachesis_group0__13_contigs__l.g6564  | 598.7725 | 259.6895 | 1.206353 | 0.00434  | 0.048832 | 1521 | - && - && PF13229:Right handed beta helix region                                                                                                                                                                                                                                                                                 |
| Lachesis_group0__13_contigs__l.g8351  | 812.5481 | 356.9993 | 1.187281 | 0.003997 | 0.045892 | 2157 | - && - && PF13417:Glutathione S-transferase, N-terminal domain                                                                                                                                                                                                                                                                   |
| Lachesis_group0__13_contigs__l.g8150  | 725.8743 | 319.4826 | 1.184277 | 0.001319 | 0.024268 | 1389 | - && Q96V64.1 RecName: Full=Glucan 1,3-beta-glucosidase; AltName: Full=Exo-1,3-beta-glucanase; Flags: Precursor && PF00150:Cellulase (glycosyl hydrolase family 5)                                                                                                                                                               |
| Lachesis_group0__13_contigs__l.g8168  | 600900.8 | 267476.6 | 1.167714 | 0.001926 | 0.029865 | 3435 | - && Q4WY82.2 RecName: Full=Linoleate 10R-lipoxygenase; AltName: Full=Cyclooxygenase-like fatty acid oxygenase; AltName: Full=Fatty acid oxygenase ppoC; AltName: Full=Linoleate 10R-dioxygenase; Short=10R-DOX; AltName: Full=Psi-producing oxygenase C; Short=AfPpoC && PF03098:Animal haem peroxidase PF00067:Cytochrome P450 |
| Lachesis_group0__13_contigs__l.g8513  | 1881.205 | 852.0801 | 1.142602 | 0.000443 | 0.011373 | 648  | - && P92963.1 RecName: Full=Ras-related protein RABB1c; Short=AtRABB1c; AltName: Full=Ras-related protein Rab2A; Short=AtRab2A && PF00071:Ras family                                                                                                                                                                             |
| Lachesis_group0__13_contigs__l.g10472 | 5148.343 | 2334.648 | 1.140932 | 0.001211 | 0.022921 | 2484 | - && A3KMV8.1 RecName: Full=Ran-binding protein 10; Short=RanBP10 && PF00622:SPRY domain PF10607:CTLH/CRA C-terminal to LisH motif domain                                                                                                                                                                                        |



|                                      |          |          |          |          |          |      |                                                                                                                                                                                                                               |
|--------------------------------------|----------|----------|----------|----------|----------|------|-------------------------------------------------------------------------------------------------------------------------------------------------------------------------------------------------------------------------------|
| Lachesis_group0__13_contigs__l.g2551 | 666.0821 | 302.2247 | 1.140444 | 0.002443 | 0.033962 | 1098 | - && B8M9K5.1 RecName: Full=2-oxoglutarate-dependent dioxygenase tropC; AltName: Full=Tropolone synthesis protein C && PF14226:non-haem dioxygenase in morphine synthesis N-terminal PF03171:2OG-Fe(II) oxygenase superfamily |
| Lachesis_group0__13_contigs__l.g7155 | 2602.697 | 1183.263 | 1.137355 | 0.002488 | 0.03423  | 1293 | - && Q12042.1 RecName: Full=Vacuolar membrane protein YPL162C && PF12400:Vacuolar membrane protein                                                                                                                            |
| Lachesis_group0__13_contigs__l.g4838 | 584.7067 | 266.2131 | 1.135007 | 0.003128 | 0.039577 | 1986 | - && Q8J0F9.1 RecName: Full=Deshydrogenase mlcG; AltName: Full=Compactin biosynthesis protein G; AltName: Full=Enoyl reductase && PF00107:Zinc-binding dehydrogenase PF08240:Alcohol dehydrogenase GroES-like domain          |
| Lachesis_group0__13_contigs__l.g6373 | 1405.912 | 641.19   | 1.132652 | 0.00118  | 0.022597 | 1047 | - && O14295.1 RecName: Full=Pyridoxal reductase; Short=PL reductase; Short=PL-red && PF00248:Aldo/keto reductase family                                                                                                       |
| Lachesis_group0__13_contigs__l.g9004 | 1015.125 | 464.9459 | 1.126746 | 0.002383 | 0.033877 | 813  | - && Q5B5P1.1 RecName: Full=Probable rhamnogalacturonate lyase C; Flags: Precursor && PF00149:Calcineurin-like phosphoesterase                                                                                                |
| Lachesis_group0__13_contigs__l.g1892 | 9426.698 | 4320.509 | 1.125539 | 0.001738 | 0.027854 | 4812 | - && P39531.4 RecName: Full=Recyclin-1 && PF12449:Protein of unknown function (DUF3684) PF07393:Exocyst complex component Sec10                                                                                               |
| Lachesis_group0__13_contigs__l.g787  | 1906.786 | 875.9689 | 1.122346 | 0.001634 | 0.026859 | 1779 | - && P79106.1 RecName: Full=Platelet-activating factor acetylhydrolase 2, cytoplasmic; AltName: Full=Serine-dependent phospholipase A2; Short=SD-PLA2 && PF03403:Platelet-activating factor acetylhydrolase, isoform II       |

|                                       |          |          |          |          |          |      |                                                                                                                                                                                                                                                                                                                                                                                                    |
|---------------------------------------|----------|----------|----------|----------|----------|------|----------------------------------------------------------------------------------------------------------------------------------------------------------------------------------------------------------------------------------------------------------------------------------------------------------------------------------------------------------------------------------------------------|
| Lachesis_group0__13_contigs__l.g10708 | 512.7933 | 235.7357 | 1.121433 | 0.002552 | 0.034806 | 1914 | - && Q3SZH7.3 RecName: Full=Leukotriene A-4 hydrolase; Short=LTA-4 hydrolase; AltName: Full=Leukotriene A(4) hydrolase && PF01433:Peptidase family M1 PF09127:Leukotriene A4 hydrolase, C-terminal                                                                                                                                                                                                 |
| Lachesis_group0__13_contigs__l.g3241  | 3737.54  | 1730.529 | 1.111017 | 0.004175 | 0.047497 | 1587 | - && Q99NF1.1 RecName: Full=Beta,beta-carotene 9',10'-oxygenase; AltName: Full=B-diox-II; AltName: Full=Beta-carotene dioxygenase 2 && PF03055:Retinal pigment epithelial membrane protein                                                                                                                                                                                                         |
| Lachesis_group0__13_contigs__l.g2884  | 2336.326 | 1081.837 | 1.110785 | 0.002335 | 0.033285 | 1236 | - && Q9Y7K9.3 RecName: Full=PARP-type zinc finger-containing protein C2A9.07c && PF00645:Poly(ADP-ribose) polymerase and DNA-Ligase Zn-finger region                                                                                                                                                                                                                                               |
| Lachesis_group0__13_contigs__l.g8709  | 14089.5  | 6553.469 | 1.104313 | 0.001649 | 0.027035 | 615  | - && P33723.1 RecName: Full=GTP-binding protein ypt1 && PF00071:Ras family                                                                                                                                                                                                                                                                                                                         |
| Lachesis_group0__13_contigs__l.g8163  | 2068.567 | 979.2101 | 1.079202 | 0.003431 | 0.042521 | 1107 | - && - && PF00651:BTB/POZ domain                                                                                                                                                                                                                                                                                                                                                                   |
| Lachesis_group0__13_contigs__l.g10129 | 478.3163 | 227.3035 | 1.073928 | 0.002987 | 0.038349 | 666  | - && Q5F389.2 RecName: Full=WW domain-containing oxidoreductase && PF00106:short chain dehydrogenase                                                                                                                                                                                                                                                                                               |
| Lachesis_group0__13_contigs__l.g11070 | 2396.744 | 1144.121 | 1.06698  | 0.001719 | 0.02776  | 3867 | - && Q5F418.1 RecName: Full=26S proteasome non-ATPase regulatory subunit 1; AltName: Full=26S proteasome regulatory subunit RPN2; AltName: Full=26S proteasome regulatory subunit S1 && PF02826:D-isomer specific 2-hydroxyacid dehydrogenase, NAD binding domain PF13646:HEAT repeats PF00389:D-isomer specific 2-hydroxyacid dehydrogenase, catalytic domain PF01851:Proteasome/cyclosome repeat |

|                                       |          |          |          |          |          |      |                                                                                                                                                                                                                                                                                                              |
|---------------------------------------|----------|----------|----------|----------|----------|------|--------------------------------------------------------------------------------------------------------------------------------------------------------------------------------------------------------------------------------------------------------------------------------------------------------------|
| Lachesis_group0__13_contigs__l.g4638  | 488.7191 | 235.0844 | 1.056071 | 0.002487 | 0.03423  | 3033 | - && O13992.1 RecName: Full=Meiotically up-regulated gene 56 protein && PF15404:Pleckstrin homology domain                                                                                                                                                                                                   |
| Lachesis_group0__13_contigs__l.g10615 | 1727.569 | 834.9073 | 1.04917  | 0.002421 | 0.033962 | 2931 | - && Q9EQH3.1 RecName: Full=Vacuolar protein sorting-associated protein 35; AltName: Full=Maternal-embryonic 3; AltName: Full=Vesicle protein sorting 35 && PF03635:Vacuolar protein sorting-associated protein 35                                                                                           |
| Lachesis_group0__13_contigs__l.g6026  | 334.3498 | 161.7083 | 1.04865  | 0.003659 | 0.043921 | 2487 | - && P0CM47.1 RecName: Full=pH-response regulator protein palA/RIM20 >P0CM46.1 RecName: Full=pH-response regulator protein palA/RIM20 && PF03097:BRO1-like domain PF13949:ALIX V-shaped domain binding to HIV                                                                                                |
| Lachesis_group0__13_contigs__l.g8524  | 5234.401 | 2535.39  | 1.045773 | 0.004456 | 0.049749 | 2562 | - && P06208.1 RecName: Full=2-isopropylmalate synthase; AltName: Full=Alpha-IPM synthase; AltName: Full=Alpha-isopropylmalate synthase && PF00682:HMGL-like PF08502:LeuA allosteric (dimerisation) domain                                                                                                    |
| Lachesis_group0__13_contigs__l.g9369  | 1495.585 | 725.9296 | 1.043126 | 0.002821 | 0.036909 | 840  | - && O14172.1 RecName: Full=Siroheme biosynthesis protein met8; Includes: RecName: Full=Precorrin-2 dehydrogenase; Includes: RecName: Full=Sirohydrochlorin ferrochelatase && PF14823:Sirohaem biosynthesis protein C-terminal PF13241:Putative NAD(P)-binding PF14824:Sirohaem biosynthesis protein central |
| Lachesis_group0__13_contigs__l.g2877  | 668.6502 | 328.5699 | 1.025117 | 0.00287  | 0.037332 | 1311 | - && - && PF04511:Der1-like family                                                                                                                                                                                                                                                                           |

|                                       |          |          |          |          |          |      |                                                                                                                                                                                                                                                                                  |
|---------------------------------------|----------|----------|----------|----------|----------|------|----------------------------------------------------------------------------------------------------------------------------------------------------------------------------------------------------------------------------------------------------------------------------------|
| Lachesis_group0__13_contigs__l.g4700  | 1347.21  | 664.0582 | 1.020746 | 0.002202 | 0.032175 | 2991 | - && P87235.1 RecName: Full=DNA repair protein rhp42 && PF03835:Rad4 transglutaminase-like domain PF10405:Rad4 beta-hairpin domain 3 PF10404:Rad4 beta-hairpin domain 2 PF10403:Rad4 beta-hairpin domain 1 PF01841:Transglutaminase-like superfamily                             |
| Lachesis_group0__13_contigs__l.g4837  | 1412.727 | 700.0937 | 1.01291  | 0.003552 | 0.043293 | 2142 | - && Q8J0F9.1 RecName: Full=Deshydrogenase mlcG; AltName: Full=Compactin biosynthesis protein G; AltName: Full=Enoyl reductase && PF08240:Alcohol dehydrogenase GroES-like domain PF00107:Zinc-binding dehydrogenase                                                             |
| Lachesis_group0__13_contigs__l.g8079  | 1763.616 | 3618.462 | -1.03694 | 0.002757 | 0.036178 | 1650 | - && - && PF11735:Cryptococcal mannosyltransferase 1                                                                                                                                                                                                                             |
| Lachesis_group0__13_contigs__l.g8182  | 611.4612 | 1270.005 | -1.05478 | 0.002711 | 0.035948 | 2562 | - && - && PF04082:Fungal specific transcription factor domain                                                                                                                                                                                                                    |
| Lachesis_group0__13_contigs__l.g10787 | 1914.28  | 3981.504 | -1.05661 | 0.004362 | 0.04894  | 2169 | - && Q9Z8P2.1 RecName: Full=3-oxoacyl-[acyl-carrier-protein] reductase FabG; AltName: Full=3-ketoacyl-acyl carrier protein reductase; AltName: Full=Beta-Ketoacyl-acyl carrier protein reductase; AltName: Full=Beta-ketoacyl-ACP reductase && PF00106:short chain dehydrogenase |
| Lachesis_group0__13_contigs__l.g5734  | 3337.29  | 7009.73  | -1.07071 | 0.00335  | 0.041679 | 1470 | - && Q9UQW9.1 RecName: Full=Ornithine decarboxylase; Short=ODC && PF02784:Pyridoxal-dependent decarboxylase, pyridoxal binding domain PF00278:Pyridoxal-dependent decarboxylase, C-terminal sheet domain                                                                         |

|                                       |          |          |          |          |          |      |                                                                                                                                                                                                                                                                           |
|---------------------------------------|----------|----------|----------|----------|----------|------|---------------------------------------------------------------------------------------------------------------------------------------------------------------------------------------------------------------------------------------------------------------------------|
| Lachesis_group0__13_contigs__l.g6232  | 173.5222 | 365.5259 | -1.07522 | 0.00175  | 0.027915 | 6039 | - && - && PF11707:Ribosome 60S biogenesis N-terminal PF16201:Nucleolar pre-ribosomal-associated protein 1                                                                                                                                                                 |
| Lachesis_group0__13_contigs__l.g6012  | 803.9085 | 1719.23  | -1.09682 | 0.003678 | 0.043921 | 2781 | - && P87320.2 RecName: Full=Protein msp1, mitochondrial; Flags: Precursor && PF01031:Dynamin central region PF00350:Dynamin family                                                                                                                                        |
| Lachesis_group0__13_contigs__l.g1284  | 646.6349 | 1383.87  | -1.09791 | 0.002391 | 0.033938 | 768  | - && Q4PHE4.1 RecName: Full=Histone H2A.Z && PF16211:C-terminus of histone H2A PF00125:Core histone H2A/H2B/H3/H4                                                                                                                                                         |
| Lachesis_group0__13_contigs__l.g9080  | 154.1983 | 332.4013 | -1.10897 | 0.003578 | 0.043293 | 693  | - && - && PF04930:FUN14 family                                                                                                                                                                                                                                            |
| Lachesis_group0__13_contigs__l.g6435  | 519.0596 | 1124.69  | -1.11594 | 0.00381  | 0.044675 | 2898 | - && P87177.1 RecName: Full=Uncharacterized WD repeat-containing protein C3D6.12 && PF00400:WD domain, G-beta repeat PF04003:Dip2/Utp12 Family                                                                                                                            |
| Lachesis_group0__13_contigs__l.g2248  | 515.8253 | 1123.958 | -1.12365 | 0.001948 | 0.030072 | 5520 | - && A3KMH1.2 RecName: Full=von Willebrand factor A domain-containing protein 8; Flags: Precursor && PF07728:AAA domain (dynein-related subfamily) PF00249:Myb-like DNA-binding domain                                                                                    |
| Lachesis_group0__13_contigs__l.g10677 | 1278.511 | 2809.159 | -1.13579 | 0.002049 | 0.031035 | 1863 | - && P0CQ78.1 RecName: Full=ATP-dependent RNA helicase DBP3 && PF00270:DEAD/DEAH box helicase PF00271:Helicase conserved C-terminal domain                                                                                                                                |
| Lachesis_group0__13_contigs__l.g1293  | 548.9393 | 1206.184 | -1.136   | 0.003507 | 0.042972 | 1245 | - && Q92925.3 RecName: Full=SWI/SNF-related matrix-associated actin-dependent regulator of chromatin subfamily D member 2; AltName: Full=60 kDa BRG-1/Brm-associated factor subunit B; AltName: Full=BRG1-associated factor 60B; Short=BAF60B && PF02201:SWIB/MDM2 domain |

|                                       |          |          |          |          |          |      |                                                                                                                                                                                                                                                                                                                      |
|---------------------------------------|----------|----------|----------|----------|----------|------|----------------------------------------------------------------------------------------------------------------------------------------------------------------------------------------------------------------------------------------------------------------------------------------------------------------------|
| Lachesis_group0__13_contigs__l.g6183  | 402.6189 | 885.5784 | -1.13749 | 0.004479 | 0.049896 | 1503 | - && P0CR27.1 RecName: Full=RuvB-like helicase 1 >P0CR26.1 RecName: Full=RuvB-like helicase 1 && PF06068:TIP49 C-terminus                                                                                                                                                                                            |
| Lachesis_group0__13_contigs__l.g297   | 3119.874 | 6874.106 | -1.13975 | 0.002721 | 0.035948 | 4278 | - && P46056.1 RecName: Full=Carbamoyl-phosphate synthase arginine-specific large chain; AltName: Full=Arginine-specific carbamoyl-phosphate synthetase, ammonia chain && PF02786:Carbamoyl-phosphate synthase L chain, ATP binding domain PF02787:Carbamoyl-phosphate synthetase large chain, oligomerisation domain |
| Lachesis_group0__13_contigs__l.g2106  | 777.175  | 1718.238 | -1.14487 | 0.003239 | 0.04062  | 1431 | - && Q9UUI4.1 RecName: Full=Uncharacterized protein C22F8.09 && PF07767:Nop53 (60S ribosomal biogenesis)                                                                                                                                                                                                             |
| Lachesis_group0__13_contigs__l.g11229 | 3243.809 | 7175.404 | -1.14541 | 0.002059 | 0.031035 | 3549 | - && Q9UTF7.1 RecName: Full=Putative elongation of fatty acids protein 1; AltName: Full=3-keto acyl-CoA synthase SPAC1B2.03c; AltName: Full=Very-long-chain 3-oxoacyl-CoA synthase 1 && PF00168:C2 domain PF00616:GTPase-activator protein for Ras-like GTPase PF01151:GNS1/SUR4 family                              |
| Lachesis_group0__13_contigs__l.g5090  | 508.4679 | 1126.156 | -1.14729 | 0.000806 | 0.017474 | 915  | - && O94511.1 RecName: Full=Putative enoyl reductase C646.07c && PF02544:3-oxo-5-alpha-steroid 4-dehydrogenase                                                                                                                                                                                                       |
| Lachesis_group0__13_contigs__l.g3442  | 1059.008 | 2348.533 | -1.14915 | 0.002873 | 0.037332 | 2256 | - && O42945.1 RecName: Full=Probable pre-mRNA-splicing factor ATP-dependent RNA helicase prp43 && PF07717:Oligonucleotide/oligosaccharide-binding (OB)-fold PF00271:Helicase conserved C-terminal domain PF00270:DEAD/DEAH box helicase PF04408:Helicase associated domain (HA2)                                     |

|                                       |          |          |          |          |          |      |                                                                                                                                                                                                                                                                                                                                                                                                                                                                                             |
|---------------------------------------|----------|----------|----------|----------|----------|------|---------------------------------------------------------------------------------------------------------------------------------------------------------------------------------------------------------------------------------------------------------------------------------------------------------------------------------------------------------------------------------------------------------------------------------------------------------------------------------------------|
| Lachesis_group0__13_contigs__l.g8681  | 2272.83  | 5057.463 | -1.15399 | 0.001553 | 0.026227 | 2808 | - && Q8WZJ7.1 RecName: Full=C-1-tetrahydrofolate synthase, cytoplasmic; Short=C1-THF synthase; Includes: RecName: Full=Methylenetetrahydrofolate dehydrogenase; Includes: RecName: Full=Methenyltetrahydrofolate cyclohydrolase; Includes: RecName: Full=Formyltetrahydrofolate synthetase && PF01268:Formate--tetrahydrofolate ligase PF02882:Tetrahydrofolate dehydrogenase/cyclohydrolase, NAD(P)-binding domain PF00763:Tetrahydrofolate dehydrogenase/cyclohydrolase, catalytic domain |
| Lachesis_group0__13_contigs__l.g10296 | 1423.519 | 3182.178 | -1.16058 | 0.003243 | 0.04062  | 2952 | - && Q4P3W3.1 RecName: Full=ATP-dependent RNA helicase DBP10 && PF00270:DEAD/DEAH box helicase PF08147:DBP10CT (NUC160) domain PF00271:Helicase conserved C-terminal domain                                                                                                                                                                                                                                                                                                                 |
| Lachesis_group0__13_contigs__l.g2413  | 146.5505 | 327.7905 | -1.1619  | 0.003928 | 0.04554  | 2898 | - && P73505.1 RecName: Full=Isoleucine--tRNA ligase; AltName: Full=Isoleucyl-tRNA synthetase; Short=IleRS && PF08264:Anticodon-binding domain of tRNA PF00133:tRNA synthetases class I (I, L, M and V)                                                                                                                                                                                                                                                                                      |
| Lachesis_group0__13_contigs__l.g2197  | 1167.069 | 2612.037 | -1.16234 | 0.002986 | 0.038349 | 2337 | - && - && PF13813:Membrane bound O-acyl transferase family                                                                                                                                                                                                                                                                                                                                                                                                                                  |
| Lachesis_group0__13_contigs__l.g778   | 91.17238 | 204.3636 | -1.1652  | 0.002729 | 0.036006 | 1626 | - && - && PF02636:Putative S-adenosyl-L-methionine-dependent methyltransferase                                                                                                                                                                                                                                                                                                                                                                                                              |
| Lachesis_group0__13_contigs__l.g9548  | 1022.292 | 2298.588 | -1.16907 | 0.001504 | 0.025804 | 990  | - && Q5XGI0.1 RecName: Full=Ribose-phosphate pyrophosphokinase 2; AltName: Full=Phosphoribosyl pyrophosphate synthase II; Short=PRS-II && PF14572:Phosphoribosyl synthetase-associated                                                                                                                                                                                                                                                                                                      |

|                                       |          |          |          |          |          |      |                                                                                                                                                                                                                                                                             |
|---------------------------------------|----------|----------|----------|----------|----------|------|-----------------------------------------------------------------------------------------------------------------------------------------------------------------------------------------------------------------------------------------------------------------------------|
|                                       |          |          |          |          |          |      | domain PF13793:N-terminal domain of ribose phosphate pyrophosphokinase                                                                                                                                                                                                      |
| Lachesis_group0__13_contigs__l.g10078 | 249.9321 | 561.944  | -1.16947 | 0.002735 | 0.036038 | 1992 | - && Q02354.2 RecName: Full=U3 small nucleolar RNA-associated protein 6; Short=U3 snoRNA-associated protein 6; AltName: Full=U three protein 6 && PF08640:U3 small nucleolar RNA-associated protein 6                                                                       |
| Lachesis_group0__13_contigs__l.g1536  | 587.6752 | 1321.831 | -1.16948 | 0.003005 | 0.038509 | 4551 | - && Q9US40.1 RecName: Full=Uncharacterized amino-acid permease C1039.01 && PF13086:AAA domain PF13520:Amino acid permease PF13087:AAA domain                                                                                                                               |
| Lachesis_group0__13_contigs__l.g9079  | 1064.845 | 2400.52  | -1.1729  | 0.002217 | 0.032348 | 2244 | - && O94268.1 RecName: Full=25S rRNA (cytosine-C(5))-methyltransferase nop2; AltName: Full=Nucleolar protein 2 && PF01189:16S rRNA methyltransferase RsmF PF17125:N-terminal domain of 16S rRNA methyltransferase RsmF                                                      |
| Lachesis_group0__13_contigs__l.g10125 | 314.3739 | 709.5501 | -1.17441 | 0.002069 | 0.031048 | 6384 | - && Q9CQG2.1 RecName: Full=Methyltransferase-like protein 16; AltName: Full=Methyltransferase 10 domain-containing protein && PF05971:Protein of unknown function (DUF890)                                                                                                 |
| Lachesis_group0__13_contigs__l.g4147  | 122.7809 | 278.1506 | -1.18036 | 0.001327 | 0.024348 | 2001 | - && Q5ZLG0.1 RecName: Full=Acetoacetyl-CoA synthetase && PF00501:AMP-binding enzyme                                                                                                                                                                                        |
| Lachesis_group0__13_contigs__l.g11041 | 1576.47  | 3573.718 | -1.18075 | 0.000755 | 0.016732 | 2637 | - && P0CS79.1 RecName: Full=AdoMet-dependent rRNA methyltransferase SPB1; AltName: Full=2'-O-ribose RNA methyltransferase; AltName: Full=S-adenosyl-L-methionine-dependent methyltransferase >P0CS78.1 RecName: Full=AdoMet-dependent rRNA methyltransferase SPB1; AltName: |



|                                      |          |          |          |          |          |      |                                                                                                                                                                                                                                                                 |
|--------------------------------------|----------|----------|----------|----------|----------|------|-----------------------------------------------------------------------------------------------------------------------------------------------------------------------------------------------------------------------------------------------------------------|
|                                      |          |          |          |          |          |      | Full=2'-O-ribose RNA methyltransferase; AltName: Full=S-adenosyl-L-methionine-dependent methyltransferase && PF07780:Spb1 C-terminal domain PF11861:Domain of unknown function (DUF3381) PF01728:FtsJ-like methyltransferase                                    |
| Lachesis_group0__13_contigs__l.g7106 | 172.169  | 391.1411 | -1.18441 | 0.003948 | 0.045559 | 1545 | - && P0CO97.1 RecName: Full=SWR1-complex protein 4 >P0CO96.1 RecName: Full=SWR1-complex protein 4 && PF05499:DNA methyltransferase 1-associated protein 1 (DMAP1) PF16282:SANT/Myb-like domain of DAMP1                                                         |
| Lachesis_group0__13_contigs__l.g5719 | 116.9881 | 266.3568 | -1.18644 | 0.003975 | 0.045749 | 3681 | - && Q09830.1 RecName: Full=TBC domain-containing protein C4G8.04 && PF00566:Rab-GTPase-TBC domain                                                                                                                                                              |
| Lachesis_group0__13_contigs__l.g3160 | 66.72776 | 152.4698 | -1.19287 | 0.002493 | 0.034238 | 1506 | - && Q8K2I1.1 RecName: Full=Protein farnesyltransferase subunit beta; Short=FTase-beta; AltName: Full=CAAX farnesyltransferase subunit beta; AltName: Full=Ras proteins prenyltransferase subunit beta && PF00432:Prenyltransferase and squalene oxidase repeat |
| Lachesis_group0__13_contigs__l.g4645 | 301.5815 | 690.4256 | -1.19515 | 0.001554 | 0.026227 | 759  | - && Q7S910.2 RecName: Full=54S ribosomal protein L4, mitochondrial; Flags: Precursor && PF06984:Mitochondrial 39-S ribosomal protein L47 (MRP-L47)                                                                                                             |
| Lachesis_group0__13_contigs__l.g9445 | 246.8224 | 564.9775 | -1.19528 | 0.003635 | 0.043709 | 1851 | - && O94250.1 RecName: Full=Probable hydroxyacylglutathione hydrolase C13B11.03c; AltName: Full=Glyoxalase II; Short=Glx II && PF16123:Hydroxyacylglutathione hydrolase C-terminus                                                                              |

|                                      |          |          |          |          |          |      |                                                                                                                                                                                              |
|--------------------------------------|----------|----------|----------|----------|----------|------|----------------------------------------------------------------------------------------------------------------------------------------------------------------------------------------------|
| Lachesis_group0__13_contigs__l.g9026 | 572.9142 | 1315.021 | -1.19888 | 0.00265  | 0.035564 | 3831 | - && O74490.1 RecName: Full=Vacuolar protein sorting-associated protein ist1 && PF03398:Regulator of Vps4 activity in the MVB pathway PF00566:Rab-GTPase-TBC domain                          |
| Lachesis_group0__13_contigs__l.g1282 | 993.3978 | 2282.227 | -1.2002  | 0.001584 | 0.026539 | 4227 | - && P13433.2 RecName: Full=DNA-directed RNA polymerase, mitochondrial; Flags: Precursor && PF00940:DNA-dependent RNA polymerase PF14700:DNA-directed RNA polymerase N-terminal              |
| Lachesis_group0__13_contigs__l.g2997 | 118.1703 | 271.8386 | -1.20343 | 0.004038 | 0.046248 | 1302 | - && A8NZM5.2 RecName: Full=WD repeat-containing protein JIP5 && -                                                                                                                           |
| Lachesis_group0__13_contigs__l.g1377 | 205.9724 | 475.0486 | -1.20601 | 0.000364 | 0.01003  | 3651 | - && A0A0D1E9B9.1 RecName: Full=Spore development regulator umv1 && PF11754:Velvet factor                                                                                                    |
| Lachesis_group0__13_contigs__l.g3875 | 1425.666 | 3291.52  | -1.20725 | 0.00217  | 0.031913 | 891  | - && P38988.1 RecName: Full=Mitochondrial GTP/GDP carrier protein 1 && PF00153:Mitochondrial carrier protein                                                                                 |
| Lachesis_group0__13_contigs__l.g1322 | 904.8309 | 2089.218 | -1.20745 | 0.003567 | 0.043293 | 1497 | - && Q7ZXV8.1 RecName: Full=BUB3-interacting and GLEBS motif-containing protein ZNF207; Short=BuGZ; Short=xBuGZ; AltName: Full=Zinc finger protein 207 && -                                  |
| Lachesis_group0__13_contigs__l.g2176 | 372.7847 | 864.7358 | -1.21428 | 0.003242 | 0.04062  | 3801 | - && O60177.1 RecName: Full=Uncharacterized ATP-dependent helicase C23E6.02 && PF00176:SNF2 family N-terminal domain PF13639:Ring finger domain PF00271:Helicase conserved C-terminal domain |
| Lachesis_group0__13_contigs__l.g2869 | 445.8647 | 1035.649 | -1.21582 | 0.001234 | 0.023219 | 618  | - && Q92429.1 RecName: Full=Superoxide dismutase [Mn], mitochondrial; AltName: Full=Mn-SOD; Flags: Precursor && PF02777:Iron/manganese superoxide                                            |

|                                       |          |          |          |          |          |      |                                                                                                                                                                                                                                                                                                                    |                          |
|---------------------------------------|----------|----------|----------|----------|----------|------|--------------------------------------------------------------------------------------------------------------------------------------------------------------------------------------------------------------------------------------------------------------------------------------------------------------------|--------------------------|
|                                       |          |          |          |          |          |      | dismutases,<br>domain PF00081:Iron/manganese<br>dismutases, alpha-hairpin domain                                                                                                                                                                                                                                   | C-terminal<br>superoxide |
| Lachesis_group0__13_contigs__l.g6921  | 541.6693 | 1258.702 | -1.2168  | 0.001048 | 0.021054 | 1242 | - && O60071.1 RecName: Full=Uncharacterized protein C13G1.09 && PF05291:Bystin                                                                                                                                                                                                                                     |                          |
| Lachesis_group0__13_contigs__l.g10377 | 1092.308 | 2547.235 | -1.22176 | 0.002715 | 0.035948 | 1317 | - && P17707.2 RecName: Full=S-adenosylmethionine decarboxylase proenzyme; Short=AdoMetDC; Short=SAMDC; Contains: RecName: Full=S-adenosylmethionine decarboxylase alpha chain; Contains: RecName: Full=S-adenosylmethionine decarboxylase beta chain; Flags: Precursor && PF01536:Adenosylmethionine decarboxylase |                          |
| Lachesis_group0__13_contigs__l.g11045 | 452.2691 | 1056.411 | -1.22418 | 0.001502 | 0.025804 | 3510 | - && Q1MTQ9.1 RecName: Full=60S ribosome subunit biogenesis protein nip7 && PF08314:Secretory pathway protein Sec39 PF03657:Uncharacterised protein family (UPF0113)                                                                                                                                               |                          |
| Lachesis_group0__13_contigs__l.g7901  | 972.5975 | 2275.002 | -1.22611 | 0.001461 | 0.025735 | 3480 | - && Q14562.1 RecName: Full=ATP-dependent RNA helicase DHX8; AltName: Full=DEAH box protein 8; AltName: Full=RNA helicase HRH1 && PF00271:Helicase conserved C-terminal domain PF07717:Oligonucleotide/oligosaccharide-binding (OB)-fold PF00575:S1 RNA binding domain PF04408:Helicase associated domain (HA2)    |                          |
| Lachesis_group0__13_contigs__l.g9187  | 533.5615 | 1250.685 | -1.2294  | 0.00302  | 0.038649 | 528  | - && Q759D1.1 RecName: Full=Ribosome biogenesis protein RLP24 && PF01246:Ribosomal protein L24e                                                                                                                                                                                                                    |                          |
| Lachesis_group0__13_contigs__l.g235   | 193.0783 | 453.6566 | -1.23279 | 0.003628 | 0.043684 | 2604 | - && Q9DE25.1 RecName: Full=Forkhead box C1-A && PF00250:Forkhead domain                                                                                                                                                                                                                                           |                          |

|                                       |          |          |          |          |          |      |                                                                                                                                                                                                                                                                                                                                                                                                                                                   |
|---------------------------------------|----------|----------|----------|----------|----------|------|---------------------------------------------------------------------------------------------------------------------------------------------------------------------------------------------------------------------------------------------------------------------------------------------------------------------------------------------------------------------------------------------------------------------------------------------------|
| Lachesis_group0__13_contigs__l.g8476  | 347.4619 | 819.3393 | -1.23805 | 0.001229 | 0.023165 | 975  | - && Q08235.2 RecName: Full=Ribosome biogenesis protein BRX1 && PF04427:Brix domain                                                                                                                                                                                                                                                                                                                                                               |
| Lachesis_group0__13_contigs__l.g11087 | 155.727  | 367.5717 | -1.23967 | 0.000898 | 0.018931 | 891  | - && - && PF07890:Rrp15p                                                                                                                                                                                                                                                                                                                                                                                                                          |
| Lachesis_group0__13_contigs__l.g2737  | 142.6589 | 336.7526 | -1.24    | 0.002637 | 0.035514 | 2064 | - && A8NZY7.1 RecName: Full=tRNA-dihydrouridine(47) synthase [NAD(P)(+)] ; AltName: Full=tRNA-dihydrouridine synthase 3 && PF01207:Dihydrouridine synthase (Dus)                                                                                                                                                                                                                                                                                  |
| Lachesis_group0__13_contigs__l.g4701  | 175.6991 | 415.1074 | -1.2413  | 0.001146 | 0.022278 | 2019 | - && P0CS09.1 RecName: Full=tRNA (adenine(58)-N(1))-methyltransferase catalytic subunit TRM61; AltName: Full=tRNA(m1A58)-methyltransferase subunit TRM61; Short=tRNA(m1A58)MTase subunit TRM61 >P0CS08.1 RecName: Full=tRNA (adenine(58)-N(1))-methyltransferase catalytic subunit TRM61; AltName: Full=tRNA(m1A58)-methyltransferase subunit TRM61; Short=tRNA(m1A58)MTase subunit TRM61 && PF08704:tRNA methyltransferase complex GCD14 subunit |
| Lachesis_group0__13_contigs__l.g1681  | 278.1704 | 658.9669 | -1.24498 | 0.001359 | 0.02482  | 3210 | - && O60113.1 RecName: Full=Uncharacterized amino-acid permease C15C4.04c && PF13520:Amino acid permease                                                                                                                                                                                                                                                                                                                                          |
| Lachesis_group0__13_contigs__l.g6920  | 907.1086 | 2152.36  | -1.24678 | 0.002606 | 0.035227 | 1299 | - && Q6GMI9.2 RecName: Full=UDP-glucuronic acid decarboxylase 1; AltName: Full=UDP-glucuronate decarboxylase 1; Short=UXS-1 && PF16363:GDP-mannose 4,6 dehydratase                                                                                                                                                                                                                                                                                |
| Lachesis_group0__13_contigs__l.g5547  | 3936.522 | 9367.418 | -1.25077 | 0.003892 | 0.045343 | 1065 | - && O14321.1 RecName: Full=Sterol 24-C-methyltransferase erg6; AltName: Full=Delta(24)-sterol C-methyltransferase erg6; AltName: Full=Ergosterol                                                                                                                                                                                                                                                                                                 |

|                                       |          |          |          |          |          |      |                                                                                                                                                                                                                |
|---------------------------------------|----------|----------|----------|----------|----------|------|----------------------------------------------------------------------------------------------------------------------------------------------------------------------------------------------------------------|
|                                       |          |          |          |          |          |      | biosynthesis protein 6 && PF13847:Methyltransferase domain PF08498:Sterol methyltransferase C-terminal                                                                                                         |
| Lachesis_group0__13_contigs__l.g11400 | 709.3711 | 1690.375 | -1.25299 | 0.001634 | 0.026859 | 1701 | - && Q4P6N0.2 RecName: Full=ATP-dependent RNA helicase HAS1 && PF13959:Domain of unknown function (DUF4217) PF00270:DEAD/DEAH box helicase PF00271:Helicase conserved C-terminal domain                        |
| Lachesis_group0__13_contigs__l.g3987  | 3893.55  | 9292.095 | -1.25494 | 0.002921 | 0.037746 | 987  | - && - && PF07716:Basic region leucine zipper                                                                                                                                                                  |
| Lachesis_group0__13_contigs__l.g6296  | 247.8179 | 592.1536 | -1.25735 | 0.002408 | 0.033962 | 2349 | - && P0CM79.1 RecName: Full=Polynucleotide 5'-hydroxyl-kinase GRC3 >P0CM78.1 RecName: Full=Polynucleotide 5'-hydroxyl-kinase GRC3 && PF16575:mRNA cleavage and polyadenylation factor CLP1 P-loop              |
| Lachesis_group0__13_contigs__l.g997   | 307.4788 | 737.9382 | -1.26357 | 0.002439 | 0.033962 | 1095 | - && O14180.1 RecName: Full=Brix domain-containing protein C4F8.04 && PF04427:Brix domain                                                                                                                      |
| Lachesis_group0__13_contigs__l.g8964  | 77.59577 | 186.4058 | -1.26412 | 0.001132 | 0.022054 | 3264 | - && P0CO92.1 RecName: Full=DNA mismatch repair protein MSH3; AltName: Full=MutS protein homolog 3 && PF01624:MutS domain I PF05188:MutS domain II PF00488:MutS domain V PF05192:MutS domain III               |
| Lachesis_group0__13_contigs__l.g4665  | 147.7199 | 355.3733 | -1.26713 | 0.001101 | 0.021674 | 5991 | - && Q92355.1 RecName: Full=Helicase sen1 && PF12726:SEN1 N terminal PF13087:AAA domain PF13086:AAA domain                                                                                                     |
| Lachesis_group0__13_contigs__l.g9391  | 100.8717 | 242.7857 | -1.26816 | 0.002988 | 0.038349 | 1275 | - && P0CO07.1 RecName: Full=Histone acetyltransferase type B catalytic subunit >P0CO06.1 RecName: Full=Histone acetyltransferase type B catalytic subunit && PF10394:Histone acetyltransferase HAT1 N-terminus |

|                                       |          |          |          |          |          |      |                                                                                                                                                                                                                                                                                                             |
|---------------------------------------|----------|----------|----------|----------|----------|------|-------------------------------------------------------------------------------------------------------------------------------------------------------------------------------------------------------------------------------------------------------------------------------------------------------------|
| Lachesis_group0__13_contigs__l.g9474  | 170.6404 | 411.8743 | -1.27149 | 0.000271 | 0.008306 | 1383 | - && B5XF11.1 RecName: Full=Lysine-specific demethylase 8; AltName: Full=JmjC domain-containing protein 5; AltName: Full=Jumonji domain-containing protein 5 [Salmo salar] && PF13621:Cupin-like domain                                                                                                     |
| Lachesis_group0__13_contigs__l.g9043  | 340.4652 | 822.6552 | -1.27324 | 0.000763 | 0.016781 | 1659 | - && Q9UTB4.1 RecName: Full=Protein mss51 && PF13824:Zinc-finger of mitochondrial splicing suppressor 51                                                                                                                                                                                                    |
| Lachesis_group0__13_contigs__l.g2918  | 413.8431 | 1001.133 | -1.27488 | 0.003949 | 0.045559 | 3672 | - && P22579.2 RecName: Full=Transcriptional regulatory protein SIN3 && PF16879:C-terminal domain of Sin3a protein PF08295:Sin3 family co-repressor PF02671:Paired amphipathic helix repeat                                                                                                                  |
| Lachesis_group0__13_contigs__l.g11334 | 1216.767 | 2944.357 | -1.27507 | 0.0012   | 0.0229   | 1569 | - && O14007.1 RecName: Full=H/ACA ribonucleoprotein complex subunit 4; AltName: Full=Centromere-binding factor 5 homolog && PF08068:DKCLD (NUC011) domain PF01472:PUA domain PF16198:tRNA pseudouridylation synthase B C-terminal domain PF01509:TruB family pseudouridylation synthase (N terminal domain) |
| Lachesis_group0__13_contigs__l.g5723  | 1121.585 | 2716.853 | -1.27644 | 0.0039   | 0.045389 | 1374 | - && B3EAE0.1 RecName: Full=8-amino-7-oxononanoate synthase; Short=AONS; AltName: Full=7-keto-8-amino-pelargonic acid synthase; Short=7-KAP synthase; Short=KAPA synthase; AltName: Full=8-amino-7-ketopelargonate synthase && PF00155:Aminotransferase class I and II                                      |
| Lachesis_group0__13_contigs__l.g5996  | 527.8261 | 1278.571 | -1.27672 | 0.000835 | 0.017944 | 1068 | - && O74978.1 RecName: Full=Uncharacterized RNA-binding protein C1827.05c && PF00076:RNA recognition motif. (a.k.a. RRM, RBD, or RNP domain)                                                                                                                                                                |

|                                       |          |          |          |          |          |      |                                                                                                                                                                                                                                                                                        |
|---------------------------------------|----------|----------|----------|----------|----------|------|----------------------------------------------------------------------------------------------------------------------------------------------------------------------------------------------------------------------------------------------------------------------------------------|
| Lachesis_group0__13_contigs__l.g3724  | 301.866  | 731.5035 | -1.27727 | 0.001162 | 0.022395 | 1962 | - && - && PF03235:Protein of unknown function DUF262                                                                                                                                                                                                                                   |
| Lachesis_group0__13_contigs__l.g11390 | 1707.654 | 4139.538 | -1.27759 | 0.002071 | 0.031048 | 2985 | - && O74359.1 RecName: Full=Meiotically up-regulated gene 60 protein && PF00013:KH domain                                                                                                                                                                                              |
| Lachesis_group0__13_contigs__l.g11392 | 186.0212 | 451.392  | -1.2794  | 0.002639 | 0.035514 | 1413 | - && Q9SKC4.1 RecName: Full=Probable E3 ubiquitin-protein ligase ARI10; AltName: Full=ARIADNE-like protein ARI10; AltName: Full=Protein ariadne homolog 10; AltName: Full=RING-type E3 ubiquitin transferase ARI10 && PF05773:RWD domain PF01485:IBR domain, a half RING-finger domain |
| Lachesis_group0__13_contigs__l.g9238  | 279.2876 | 680.1067 | -1.28468 | 0.00271  | 0.035948 | 1980 | - && A8NVW1.2 RecName: Full=Mitochondrial outer membrane protein IML2 && PF10300:Protein of unknown function (DUF3808)                                                                                                                                                                 |
| Lachesis_group0__13_contigs__l.g5168  | 70.14058 | 171.6198 | -1.29051 | 0.00368  | 0.043921 | 1347 | - && P20397.3 RecName: Full=Nucleolin; AltName: Full=Protein C23 && PF14259:RNA recognition motif (a.k.a. RRM, RBD, or RNP domain) PF00076:RNA recognition motif. (a.k.a. RRM, RBD, or RNP domain)                                                                                     |
| Lachesis_group0__13_contigs__l.g133   | 658.0892 | 1615.441 | -1.29568 | 7.90E-05 | 0.003444 | 417  | - && P0CO05.1 RecName: Full=Histone H3 >P0CO04.1 RecName: Full=Histone H3 && PF00125:Core histone H2A/H2B/H3/H4                                                                                                                                                                        |
| Lachesis_group0__13_contigs__l.g4056  | 547.5354 | 1346.458 | -1.29855 | 0.001444 | 0.025578 | 939  | - && - && PF08790:LYAR-type C2HC zinc finger                                                                                                                                                                                                                                           |
| Lachesis_group0__13_contigs__l.g11453 | 1031.061 | 2541.412 | -1.30167 | 0.001806 | 0.028487 | 876  | - && Q55ED1.1 RecName: Full=Probable nucleosome assembly protein && PF00956:Nucleosome assembly protein (NAP)                                                                                                                                                                          |
| Lachesis_group0__13_contigs__l.g11420 | 329.5307 | 812.9292 | -1.30316 | 0.002107 | 0.031301 | 681  | - && Q5RKQ0.1 RecName: Full=Pre-mRNA-splicing factor SPF27; AltName: Full=Protein BCAS2 homolog && PF05700:Breast carcinoma amplified sequence 2 (BCAS2)                                                                                                                               |

|                                       |          |          |          |          |          |      |                                                                                                                                                                                                                                                                                                                                                                                                                                  |
|---------------------------------------|----------|----------|----------|----------|----------|------|----------------------------------------------------------------------------------------------------------------------------------------------------------------------------------------------------------------------------------------------------------------------------------------------------------------------------------------------------------------------------------------------------------------------------------|
| Lachesis_group0__13_contigs__l.g8819  | 1592.96  | 3934.566 | -1.30459 | 0.001426 | 0.025394 | 1038 | - && A1D3T4.1 RecName: Full=Probable arabinogalactan endo-beta-1,4-galactanase A; AltName: Full=Endo-1,4-beta-galactanase A; Short=Galactanase A; Flags: Precursor && PF07745:Glycosyl hydrolase family 53                                                                                                                                                                                                                       |
| Lachesis_group0__13_contigs__l.g7405  | 1877.356 | 4645.917 | -1.30736 | 0.000759 | 0.016774 | 1146 | - && P0CP98.1 RecName: Full=FK506-binding protein 4; AltName: Full=Histone proline isomerase; AltName: Full=Peptidyl-prolyl cis-trans isomerase; Short=PPIase; AltName: Full=Rotamase >P0CP99.1 RecName: Full=FK506-binding protein 4; AltName: Full=Histone proline isomerase; AltName: Full=Peptidyl-prolyl cis-trans isomerase; Short=PPIase; AltName: Full=Rotamase && PF00254:FKBP-type peptidyl-prolyl cis-trans isomerase |
| Lachesis_group0__13_contigs__l.g7781  | 186.4394 | 461.1871 | -1.30759 | 0.002514 | 0.034426 | 963  | - && Q14684.3 RecName: Full=Ribosomal RNA processing protein 1 homolog B; AltName: Full=RRP1-like protein B && PF05997:Nucleolar protein,Nop52                                                                                                                                                                                                                                                                                   |
| Lachesis_group0__13_contigs__l.g10494 | 115.1667 | 285.1505 | -1.30914 | 0.003476 | 0.042856 | 4080 | - && - && PF12738:twin BRCT domain                                                                                                                                                                                                                                                                                                                                                                                               |
| Lachesis_group0__13_contigs__l.g4034  | 267.6011 | 663.2692 | -1.31011 | 0.00248  | 0.03423  | 1011 | - && Q10248.2 RecName: Full=Uncharacterized mitochondrial carrier C4G9.20c && PF00153:Mitochondrial carrier protein                                                                                                                                                                                                                                                                                                              |
| Lachesis_group0__13_contigs__l.g11194 | 386.9759 | 959.3554 | -1.3104  | 0.001252 | 0.023417 | 2298 | - && O13910.1 RecName: Full=U3 small nucleolar ribonucleoprotein protein mpp10 && PF04006:Mpp10 protein                                                                                                                                                                                                                                                                                                                          |
| Lachesis_group0__13_contigs__l.g1295  | 74.70645 | 185.5743 | -1.31282 | 0.004492 | 0.049923 | 1803 | - && Q6NRG5.1 RecName: Full=NADPH-dependent diflavin oxidoreductase 1; AltName: Full=NADPH-dependent FMN and FAD-containing oxidoreductase && PF00667:FAD binding                                                                                                                                                                                                                                                                |



|                                      |          |          |          |          |          |      |                                                                                                                                                                                                                                                                                     |
|--------------------------------------|----------|----------|----------|----------|----------|------|-------------------------------------------------------------------------------------------------------------------------------------------------------------------------------------------------------------------------------------------------------------------------------------|
|                                      |          |          |          |          |          |      | domain PF00258:Flavodoxin PF00175:Oxidoreductase NAD-binding domain                                                                                                                                                                                                                 |
| Lachesis_group0__13_contigs__l.g9167 | 260.3707 | 647.8844 | -1.31594 | 0.003889 | 0.045343 | 732  | - && Q9CY21.1 RecName: Full=Probable 18S rRNA (guanine-N(7))-methyltransferase; AltName: Full=Bud site selection protein 23 homolog; AltName: Full=Williams-Beuren syndrome chromosomal region 22 protein homolog && PF12589:Methyltransferase involved in Williams-Beuren syndrome |
| Lachesis_group0__13_contigs__l.g2345 | 83.22058 | 207.3942 | -1.31751 | 0.002338 | 0.033285 | 2796 | - && O13396.1 RecName: Full=DNA mismatch repair protein msh-2 && PF01624:MutS domain I PF05190:MutS family domain IV PF00488:MutS domain V PF05192:MutS domain III PF05188:MutS domain II                                                                                           |
| Lachesis_group0__13_contigs__l.g5783 | 251.4212 | 626.9854 | -1.31865 | 0.001071 | 0.021345 | 717  | - && P35521.1 RecName: Full=Methylosome subunit pICln; AltName: Full=Chloride channel, nucleotide sensitive 1A; AltName: Full=Chloride conductance regulatory protein ICln; Short=I(Cln) && PF03517:Regulator of volume decrease after cellular swelling                            |
| Lachesis_group0__13_contigs__l.g9364 | 150.7638 | 376.2297 | -1.31952 | 0.002422 | 0.033962 | 1035 | - && Q10480.2 RecName: Full=Nuclease 1, mitochondrial; AltName: Full=SpNUC1; Flags: Precursor && PF01223:DNA/RNA non-specific endonuclease                                                                                                                                          |
| Lachesis_group0__13_contigs__l.g1360 | 1512.369 | 3778.617 | -1.32112 | 0.000399 | 0.010614 | 1701 | - && P87058.1 RecName: Full=La protein homolog; AltName: Full=La autoantigen homolog; AltName: Full=La ribonucleoprotein && PF05383:La domain PF00076:RNA recognition motif. (a.k.a. RRM, RBD, or RNP domain)                                                                       |

|                                       |          |          |          |          |          |      |                                                                                                                                                                                              |
|---------------------------------------|----------|----------|----------|----------|----------|------|----------------------------------------------------------------------------------------------------------------------------------------------------------------------------------------------|
| Lachesis_group0__13_contigs__l.g978   | 204.7969 | 512.5428 | -1.32381 | 0.00029  | 0.008702 | 948  | - && Q9UTE6.1 RecName: Full=Protein mak16 && PF01778:Ribosomal L28e protein family PF04874:Mak16 protein C-terminal region                                                                   |
| Lachesis_group0__13_contigs__l.g5246  | 105.6459 | 264.2306 | -1.32384 | 0.00211  | 0.031301 | 711  | - && P54168.1 RecName: Full=Uncharacterized protein YpgQ && -                                                                                                                                |
| Lachesis_group0__13_contigs__l.g10437 | 161.7573 | 404.7992 | -1.32391 | 0.000556 | 0.013256 | 1173 | - && - && PF00398:Ribosomal RNA adenine dimethylase                                                                                                                                          |
| Lachesis_group0__13_contigs__l.g10133 | 211.2036 | 529.8383 | -1.32709 | 0.00098  | 0.020086 | 960  | - && Q09704.1 RecName: Full=Exosome complex component rrp4; AltName: Full=Ribosomal RNA-processing protein 4 && PF14382:Exosome complex exonuclease RRP4 N-terminal region PF15985:KH domain |
| Lachesis_group0__13_contigs__l.g10764 | 711.5621 | 1785.195 | -1.3271  | 0.003944 | 0.045559 | 3171 | - && Q09833.1 RecName: Full=tRNA (uracil(54)-C(5))-methyltransferase && PF05958:tRNA (Uracil-5)-methyltransferase                                                                            |
| Lachesis_group0__13_contigs__l.g5743  | 55.4072  | 139.2412 | -1.33028 | 0.002033 | 0.030999 | 1011 | - && - && PF04005:Hus1-like protein                                                                                                                                                          |
| Lachesis_group0__13_contigs__l.g3894  | 3404.946 | 8620.379 | -1.34018 | 0.001452 | 0.025672 | 2352 | - && O59838.2 RecName: Full=Heat shock protein homolog pss1 && PF00012:Hsp70 protein PF10712:NAD-specific glutamate dehydrogenase                                                            |
| Lachesis_group0__13_contigs__l.g1354  | 40.11223 | 101.5561 | -1.34101 | 0.002626 | 0.035444 | 1632 | - && P39932.2 RecName: Full=Sugar transporter STL1 && PF00083:Sugar (and other) transporter                                                                                                  |
| Lachesis_group0__13_contigs__l.g4727  | 275.3781 | 698.4954 | -1.34322 | 0.00027  | 0.008283 | 2781 | - && O74832.1 RecName: Full=mRNA degradation protein pet127, mitochondrial; Flags: Precursor && PF08634:Mitochondrial protein Pet127                                                         |
| Lachesis_group0__13_contigs__l.g1294  | 526.0473 | 1335.313 | -1.34412 | 0.001507 | 0.025804 | 2220 | - && Q9UUD0.1 RecName: Full=Uncharacterized protein C19C2.10 && PF03114:BAR domain PF14604:Variant SH3 domain                                                                                |

|                                       |          |          |          |          |          |      |                                                                                                                                                                                                                |
|---------------------------------------|----------|----------|----------|----------|----------|------|----------------------------------------------------------------------------------------------------------------------------------------------------------------------------------------------------------------|
| Lachesis_group0__13_contigs__l.g7787  | 2116.01  | 5384.351 | -1.34745 | 0.000529 | 0.012805 | 312  | - && P62792.2 RecName: Full=Histone H4 >P62793.2<br>RecName: Full=Histone H4 && PF15511:Centromere<br>kinetochore component CENP-T histone fold                                                                |
| Lachesis_group0__13_contigs__l.g1461  | 1365.531 | 3484.348 | -1.35149 | 0.001606 | 0.026728 | 609  | - && - && PF10342:Ser-Thr-rich glycosyl-phosphatidyl-<br>inositol-anchored membrane family                                                                                                                     |
| Lachesis_group0__13_contigs__l.g11275 | 510.0623 | 1302.466 | -1.35292 | 0.003731 | 0.04416  | 1038 | - && Q6DHC3.1 RecName: Full=Solute carrier family<br>25 member 40 && PF00153:Mitochondrial carrier<br>protein                                                                                                  |
| Lachesis_group0__13_contigs__l.g303   | 59.4406  | 151.7523 | -1.35305 | 0.003164 | 0.039942 | 1896 | - && Q10181.1 RecName: Full=Uncharacterized protein<br>C3F10.06c && PF04179:Initiator tRNA phosphoribosyl<br>transferase                                                                                       |
| Lachesis_group0__13_contigs__l.g8445  | 192.168  | 491.2365 | -1.35436 | 0.001675 | 0.027257 | 1857 | - && - && PF12937:F-box-like                                                                                                                                                                                   |
| Lachesis_group0__13_contigs__l.g9423  | 54.7702  | 140.1374 | -1.35525 | 0.001478 | 0.025764 | 1491 | - && - && PF07690:Major Facilitator Superfamily                                                                                                                                                                |
| Lachesis_group0__13_contigs__l.g6085  | 268.504  | 688.0754 | -1.35759 | 0.000198 | 0.006685 | 2295 | - && Q4V8D1.1 RecName: Full=Cytochrome P450 2U1<br>&& PF00106:short chain<br>dehydrogenase PF00067:Cytochrome P450                                                                                             |
| Lachesis_group0__13_contigs__l.g11040 | 741.3897 | 1901.146 | -1.35861 | 0.002061 | 0.031035 | 2682 | - && Q9P7G8.1 RecName: Full=UPF0382 membrane<br>protein C1782.12c; Flags: Precursor &&<br>PF04241:Protein of unknown function (DUF423)                                                                         |
| Lachesis_group0__13_contigs__l.g10881 | 322.1599 | 826.7771 | -1.36008 | 0.000536 | 0.012899 | 1215 | - && Q9HE11.2 RecName: Full=U3 small nucleolar<br>RNA-associated protein 5; Short=U3 snoRNA-<br>associated protein 5; AltName: Full=U3 protein 5<br>required for transcription && PF04003:Dip2/Utp12<br>Family |
| Lachesis_group0__13_contigs__l.g6402  | 942.8312 | 2430.901 | -1.36654 | 0.002194 | 0.032118 | 4827 | - && Q09878.2 RecName: Full=Probable sulfite<br>reductase [NADPH] flavoprotein component &&<br>PF00175:Oxidoreductase NAD-binding                                                                              |

|                                       |          |          |          |          |          |      |                                                                                                                                                                                                                                          |
|---------------------------------------|----------|----------|----------|----------|----------|------|------------------------------------------------------------------------------------------------------------------------------------------------------------------------------------------------------------------------------------------|
|                                       |          |          |          |          |          |      | domain PF00667:FAD binding                                                                                                                                                                                                               |
|                                       |          |          |          |          |          |      | domain PF00759:Glycosyl hydrolase family 9                                                                                                                                                                                               |
| Lachesis_group0__13_contigs__l.g11297 | 588.2689 | 1516.803 | -1.36679 | 0.002103 | 0.031301 | 729  | - && Q4P4X6.2 RecName: Full=Eukaryotic translation initiation factor 3 subunit K; Short=eIF3k; AltName: Full=eIF-3 p25 && PF10075:CSN8/PSMD8/EIF3K family                                                                                |
| Lachesis_group0__13_contigs__l.g2767  | 765.3907 | 1974.817 | -1.36764 | 0.000142 | 0.005294 | 1815 | - && Q9P7C0.1 RecName: Full=Uncharacterized WD repeat-containing protein C2E1P5.05 && -                                                                                                                                                  |
| Lachesis_group0__13_contigs__l.g4177  | 106.4367 | 274.334  | -1.36767 | 0.002456 | 0.034085 | 1722 | - && B7F9G7.1 RecName: Full=Heptahelical transmembrane protein ADIPOR1; AltName: Full=PAQR family protein ADIPOR1 && PF03006:Haemolysin-III related                                                                                      |
| Lachesis_group0__13_contigs__l.g3351  | 180.3852 | 465.5031 | -1.36849 | 0.003197 | 0.040242 | 1011 | - && Q10205.1 RecName: Full=Exosome complex component rrp43; AltName: Full=Ribosomal RNA-processing protein 43 && PF01138:3' exoribonuclease family, domain 1                                                                            |
| Lachesis_group0__13_contigs__l.g5906  | 497.7522 | 1285.439 | -1.369   | 0.002323 | 0.033178 | 834  | - && - && PF05817:Oligosaccharyltransferase subunit Ribophorin II                                                                                                                                                                        |
| Lachesis_group0__13_contigs__l.g1587  | 228.0273 | 589.268  | -1.36953 | 0.002415 | 0.033962 | 3087 | - && B0D4E6.1 RecName: Full=Phosphatidylethanolamine N-methyltransferase; Short=PE methyltransferase; Short=PEAMT; Short=PEMT && PF04191:Phospholipid methyltransferase                                                                  |
| Lachesis_group0__13_contigs__l.g5292  | 306.2436 | 792.0214 | -1.37116 | 0.002587 | 0.035108 | 1389 | - && Q6NUA1.1 RecName: Full=Protein arginine N-methyltransferase 5; AltName: Full=Histone synthetic lethal 7 protein; Short=Hsl7; AltName: Full=Histone-arginine N-methyltransferase PRMT5 && PF05185:PRMT5 arginine-N-methyltransferase |

|                                       |          |          |          |          |          |      |                                                                                                                                                                                                                                                                                                                                                                                                                                                |
|---------------------------------------|----------|----------|----------|----------|----------|------|------------------------------------------------------------------------------------------------------------------------------------------------------------------------------------------------------------------------------------------------------------------------------------------------------------------------------------------------------------------------------------------------------------------------------------------------|
| Lachesis_group0__13_contigs__l.g2646  | 425.9187 | 1101.933 | -1.37153 | 0.001206 | 0.022921 | 2985 | - && O13671.2 RecName: Full=Importin-alpha re-exporter; AltName: Full=Cellular apoptosis susceptibility protein homolog && PF03378:CAS/CSE protein, C-terminus PF08506:Cse1 PF03810:Importin-beta N-terminal domain                                                                                                                                                                                                                            |
| Lachesis_group0__13_contigs__l.g10512 | 3013.304 | 7798.628 | -1.37192 | 0.000469 | 0.011803 | 3609 | - && Q11119.2 RecName: Full=Ubiquitin carboxyl-terminal hydrolase 14; AltName: Full=Deubiquitinating enzyme 14; AltName: Full=UBA domain-containing protein 2; AltName: Full=Ubiquitin thioesterase 14; AltName: Full=Ubiquitin-specific-processing protease 14 && PF00956:Nucleosome assembly protein (NAP) PF00627:UBA/TS-N domain PF02148:Zn-finger in ubiquitin-hydrolases and other protein PF00443:Ubiquitin carboxyl-terminal hydrolase |
| Lachesis_group0__13_contigs__l.g6316  | 179.4853 | 464.7692 | -1.37288 | 0.000446 | 0.011385 | 3777 | - && Q6L4S0.1 RecName: Full=DNA damage-binding protein 1; AltName: Full=UV-damaged DNA-binding protein 1; Short=OsUV-DDB1 && PF10433:Mono-functional DNA-alkylating methyl methanesulfonate N-term PF03178:CPSF A subunit region                                                                                                                                                                                                               |
| Lachesis_group0__13_contigs__l.g11397 | 242.3723 | 631.7441 | -1.38262 | 0.002699 | 0.035948 | 300  | - && P0CR99.1 RecName: Full=Mitochondrial import inner membrane translocase subunit TIM10 >P0CR98.1 RecName: Full=Mitochondrial import inner membrane translocase subunit TIM10 && PF02953:Tim10/DDP family zinc finger                                                                                                                                                                                                                        |
| Lachesis_group0__13_contigs__l.g6493  | 667.9087 | 1742.756 | -1.3837  | 0.002442 | 0.033962 | 555  | - && Q03020.1 RecName: Full=Iron sulfur cluster assembly protein 1, mitochondrial; AltName: Full=Iron                                                                                                                                                                                                                                                                                                                                          |

|                                      |          |          |          |          |          |      |                                                                                                                                                                                                                                         |
|--------------------------------------|----------|----------|----------|----------|----------|------|-----------------------------------------------------------------------------------------------------------------------------------------------------------------------------------------------------------------------------------------|
|                                      |          |          |          |          |          |      | sulfur cluster scaffold protein 1; Flags: Precursor && PF01592:NifU-like N terminal domain                                                                                                                                              |
| Lachesis_group0__13_contigs__l.g5532 | 565.816  | 1478.445 | -1.38595 | 0.001054 | 0.021054 | 2313 | - && P0CQ91.1 RecName: Full=ATP-dependent RNA helicase MAK5 && PF00270:DEAD/DEAH box helicase PF00271:Helicase conserved C-terminal domain                                                                                              |
| Lachesis_group0__13_contigs__l.g8180 | 218.0733 | 570.3042 | -1.38757 | 0.001817 | 0.028603 | 1734 | - && O43011.2 RecName: Full=Histidine--tRNA ligase, mitochondrial; AltName: Full=Histidyl-tRNA synthetase; Short=HisRS; Flags: Precursor && PF03129:Anticodon binding domain PF13393:Histidyl-tRNA synthetase                           |
| Lachesis_group0__13_contigs__l.g4249 | 92.03268 | 241.3963 | -1.39178 | 0.000888 | 0.018826 | 3876 | - && - && PF13532:2OG-Fe(II) oxygenase superfamily                                                                                                                                                                                      |
| Lachesis_group0__13_contigs__l.g9133 | 30.50182 | 79.9657  | -1.39186 | 0.003523 | 0.043082 | 2307 | - && O60174.1 RecName: Full=Transcription factor tau subunit sfc6; AltName: Full=TFIIIC subunit sfc6; AltName: Full=Transcription factor C subunit 6 && -                                                                               |
| Lachesis_group0__13_contigs__l.g9430 | 373.5233 | 979.9387 | -1.39186 | 0.000295 | 0.008814 | 1398 | - && O14206.2 RecName: Full=Brix domain-containing protein C1B9.03c && PF04427:Brix domain                                                                                                                                              |
| Lachesis_group0__13_contigs__l.g139  | 113.4424 | 297.6513 | -1.39268 | 0.00259  | 0.035108 | 588  | - && Q63042.2 RecName: Full=FAD-linked sulfhydryl oxidase ALR; AltName: Full=Augmenter of liver regeneration && PF04777:Erv1 / Alr family                                                                                               |
| Lachesis_group0__13_contigs__l.g1807 | 50.19611 | 131.6278 | -1.39336 | 0.001386 | 0.025024 | 1380 | - && Q9Y8H5.2 RecName: Full=Delta(12) fatty acid desaturase; AltName: Full=Delta-12 fatty acid desaturase && PF00487:Fatty acid desaturase                                                                                              |
| Lachesis_group0__13_contigs__l.g6775 | 279.4959 | 735.6348 | -1.39667 | 0.001436 | 0.025471 | 606  | - && O14225.1 RecName: Full=Mitochondrial import receptor subunit tom20; AltName: Full=Mitochondrial 20 kDa outer membrane protein; AltName: Full=Translocase of outer membrane 20 kDa subunit && PF02064:MAS20 protein import receptor |

|                                       |          |          |          |          |          |      |                                                                                                                                                                                                                                               |
|---------------------------------------|----------|----------|----------|----------|----------|------|-----------------------------------------------------------------------------------------------------------------------------------------------------------------------------------------------------------------------------------------------|
| Lachesis_group0__13_contigs__l.g2141  | 307.7372 | 811.4327 | -1.39925 | 0.000418 | 0.011018 | 1203 | - && - && PF15459:60S ribosome biogenesis protein Rrp14 PF04935:Surfeit locus protein 6                                                                                                                                                       |
| Lachesis_group0__13_contigs__l.g6964  | 222.9506 | 589.08   | -1.40191 | 0.002053 | 0.031035 | 2184 | - && Q9P7H1.1 RecName: Full=Tyrosine-protein phosphatase CDC14 homolog; AltName: Full=CDC fourteen-like phosphatase 1 && PF00782:Dual specificity phosphatase, catalytic domain PF14671:Dual specificity protein phosphatase, N-terminal half |
| Lachesis_group0__13_contigs__l.g10983 | 80.95631 | 213.6264 | -1.40223 | 0.0031   | 0.039297 | 1242 | - && - && PF10453:Nuclear fragile X mental retardation-interacting protein 1 (NUFIP1)                                                                                                                                                         |
| Lachesis_group0__13_contigs__l.g10991 | 101.5206 | 269.9763 | -1.4121  | 0.000853 | 0.018234 | 2340 | - && A3M0B1.2 RecName: Full=Pre-rRNA-processing protein IPI1 && PF12333:Rix1 complex component involved in 60S ribosome maturation                                                                                                            |
| Lachesis_group0__13_contigs__l.g2649  | 173.9128 | 462.9922 | -1.41304 | 0.002228 | 0.032381 | 1830 | - && O14059.1 RecName: Full=Probable histidinol-phosphatase; Short=HolPase && PF00111:2Fe-2S iron-sulfur cluster binding domain PF02811:PHP domain                                                                                            |
| Lachesis_group0__13_contigs__l.g5539  | 181.7608 | 483.8561 | -1.41337 | 0.001167 | 0.022443 | 594  | - && Q4X0T4.1 RecName: Full=Required for respiratory growth protein 9, mitochondrial; Flags: Precursor >B0XSW5.1 RecName: Full=Required for respiratory growth protein 9, mitochondrial; Flags: Precursor && PF06413:Neugrin                  |
| Lachesis_group0__13_contigs__l.g10875 | 291.113  | 777.0278 | -1.41712 | 0.000885 | 0.018789 | 1773 | - && Q75AE1.1 RecName: Full=ATP-dependent RNA helicase ROK1 && PF00270:DEAD/DEAH box helicase PF00271:Helicase conserved C-terminal domain                                                                                                    |
| Lachesis_group0__13_contigs__l.g3848  | 337.5789 | 902.6977 | -1.41938 | 0.000378 | 0.010208 | 3603 | - && - && PF12937:F-box-like                                                                                                                                                                                                                  |

|                                       |          |          |          |          |          |      |                                                                                                                                                                                                                                                                                                                                                                                                                                         |
|---------------------------------------|----------|----------|----------|----------|----------|------|-----------------------------------------------------------------------------------------------------------------------------------------------------------------------------------------------------------------------------------------------------------------------------------------------------------------------------------------------------------------------------------------------------------------------------------------|
| Lachesis_group0__13_contigs__l.g9116  | 49.26561 | 132.172  | -1.42586 | 0.001697 | 0.027469 | 936  | - && Q2KIB9.1 RecName: Full=Ribonuclease P protein subunit p29 && PF01868:Domain of unknown function UPF0086                                                                                                                                                                                                                                                                                                                            |
| Lachesis_group0__13_contigs__l.g11445 | 471.8253 | 1267.918 | -1.42642 | 0.000355 | 0.009881 | 1398 | - && Q10276.1 RecName: Full=Putative choline kinase && PF01633:Choline/ethanolamine kinase                                                                                                                                                                                                                                                                                                                                              |
| Lachesis_group0__13_contigs__l.g3244  | 53.36474 | 143.1858 | -1.42706 | 0.002422 | 0.033962 | 1602 | - && - && PF04305:Protein of unknown function (DUF455) PF00355:Rieske [2Fe-2S] domain                                                                                                                                                                                                                                                                                                                                                   |
| Lachesis_group0__13_contigs__l.g9427  | 65.24912 | 175.1226 | -1.42717 | 0.002405 | 0.033962 | 1128 | - && O94684.1 RecName: Full=RNA polymerase II transcription factor B subunit 3; AltName: Full=CDK-activating kinase assembly factor MAT1 homolog; AltName: Full=RING finger protein pmh1; AltName: Full=RNA polymerase II transcription factor B 38 kDa subunit; AltName: Full=RNA polymerase II transcription factor B p38 subunit && PF06391:CDK-activating kinase assembly factor MAT1 PF17121:Zinc finger, C3HC4 type (RING finger) |
| Lachesis_group0__13_contigs__l.g249   | 826.9805 | 2225.163 | -1.42816 | 0.000864 | 0.018442 | 669  | - && O13917.1 RecName: Full=Hypoxanthine-guanine phosphoribosyltransferase; Short=HGPRT; Short=HGPRTase && -                                                                                                                                                                                                                                                                                                                            |
| Lachesis_group0__13_contigs__l.g460   | 468.9561 | 1264.967 | -1.43121 | 0.000402 | 0.010663 | 2217 | - && P38776.1 RecName: Full=Probable drug/proton antiporter YHK8 && PF07690:Major Facilitator Superfamily                                                                                                                                                                                                                                                                                                                               |
| Lachesis_group0__13_contigs__l.g442   | 600.1384 | 1621.839 | -1.43461 | 0.000222 | 0.007243 | 1125 | - && P46794.2 RecName: Full=Cystathionine beta-synthase; AltName: Full=Beta-thionase; AltName: Full=Serine sulfhydryase && PF00291:Pyridoxal-phosphate dependent enzyme                                                                                                                                                                                                                                                                 |
| Lachesis_group0__13_contigs__l.g11301 | 699.2073 | 1895.037 | -1.43869 | 0.000224 | 0.007293 | 1869 | - && A8N1X3.1 RecName: Full=Pescadillo homolog; AltName: Full=Nucleolar protein 7 homolog &&                                                                                                                                                                                                                                                                                                                                            |



|                                       |          |          |          |          |          |      |                                                                                                                                                                                                                                                    |
|---------------------------------------|----------|----------|----------|----------|----------|------|----------------------------------------------------------------------------------------------------------------------------------------------------------------------------------------------------------------------------------------------------|
|                                       |          |          |          |          |          |      | PF16589:BRCT domain, a BRCA1 C-terminus domain PF06732:Pescadillo N-terminus                                                                                                                                                                       |
| Lachesis_group0__13_contigs__l.g11128 | 636.778  | 1727.496 | -1.44016 | 0.000446 | 0.011385 | 4425 | - && O74835.1 RecName: Full=rRNA biogenesis protein rrp5; AltName: Full=Ribosomal RNA-processing protein 5; AltName: Full=U3 small nucleolar RNA-associated protein rrp5; Short=U3 snoRNA-associated protein rrp5 && PF00575:S1 RNA binding domain |
| Lachesis_group0__13_contigs__l.g1957  | 515.8708 | 1400.982 | -1.44165 | 0.000465 | 0.011739 | 1656 | - && Q9USK3.1 RecName: Full=Uncharacterized transporter C4B3.13 && PF01554:MatE                                                                                                                                                                    |
| Lachesis_group0__13_contigs__l.g6210  | 44.69751 | 121.5604 | -1.44539 | 0.001394 | 0.02507  | 1011 | - && P0CR37.1 RecName: Full=3-ketodihydrosphingosine reductase TSC10; AltName: Full=3-dehydrosphinganine reductase; AltName: Full=KDS reductase && PF00106:short chain dehydrogenase                                                               |
| Lachesis_group0__13_contigs__l.g6547  | 37.99883 | 103.8276 | -1.45068 | 0.003485 | 0.042856 | 1080 | - && - && PF00011:Hsp20/alpha crystallin family                                                                                                                                                                                                    |
| Lachesis_group0__13_contigs__l.g6656  | 71.98291 | 196.6493 | -1.45205 | 0.001903 | 0.029557 | 1707 | - && P0CN19.1 RecName: Full=Diphthamide biosynthesis protein 1 >P0CN18.1 RecName: Full=Diphthamide biosynthesis protein 1 && PF01866:Putative diphthamide synthesis protein                                                                        |
| Lachesis_group0__13_contigs__l.g9977  | 313.9699 | 859.6152 | -1.45324 | 0.000921 | 0.019172 | 1269 | - && - && PF07766:LETM1-like protein                                                                                                                                                                                                               |
| Lachesis_group0__13_contigs__l.g9910  | 1621.297 | 4444.329 | -1.4549  | 7.68E-05 | 0.003409 | 1863 | - && - && PF04577:Protein of unknown function (DUF563)                                                                                                                                                                                             |
| Lachesis_group0__13_contigs__l.g6429  | 4857.879 | 13330.07 | -1.45629 | 0.000634 | 0.014659 | 1953 | - && O59714.1 RecName: Full=Uncharacterized membrane protein C3B8.06 && PF10348:Domain of unknown function (DUF2427) PF10355:Protein of unknown function (Ytp1)                                                                                    |

|                                      |          |          |          |          |          |      |                                                                                                                                                                                                                                                                                                                                                                                |
|--------------------------------------|----------|----------|----------|----------|----------|------|--------------------------------------------------------------------------------------------------------------------------------------------------------------------------------------------------------------------------------------------------------------------------------------------------------------------------------------------------------------------------------|
| Lachesis_group0__13_contigs__l.g2025 | 36.04074 | 98.71019 | -1.45724 | 0.001987 | 0.030369 | 1167 | - && Q9LVH5.1 RecName: Full=Outer envelope protein 64, chloroplastic; AltName: Full=Translocon at the outer membrane of chloroplasts 64-III && PF13414:TPR repeat PF07719:Tetratricopeptide repeat PF13877:Potential Monad-binding region of RPAP3                                                                                                                             |
| Lachesis_group0__13_contigs__l.g6146 | 2421.466 | 6650.237 | -1.45758 | 0.000827 | 0.017849 | 1731 | - && P38861.3 RecName: Full=60S ribosomal export protein NMD3; AltName: Full=Nonsense-mediated mRNA decay protein 3 && PF04981:NMD3 family                                                                                                                                                                                                                                     |
| Lachesis_group0__13_contigs__l.g5936 | 1127.696 | 3097.228 | -1.45764 | 0.000716 | 0.016088 | 3354 | - && P0CQ17.1 RecName: Full=Lon protease homolog, mitochondrial; Flags: Precursor && PF05362:Lon protease (S16) C-terminal proteolytic domain PF02190:ATP-dependent protease La (LON) substrate-binding domain PF00004:ATPase family associated with various cellular activities (AAA)                                                                                         |
| Lachesis_group0__13_contigs__l.g2580 | 24.46254 | 67.29542 | -1.45894 | 0.001771 | 0.028174 | 4932 | - && - && PF00400:WD domain, G-beta repeat PF05729:NACHT domain                                                                                                                                                                                                                                                                                                                |
| Lachesis_group0__13_contigs__l.g8600 | 23.0765  | 63.45526 | -1.46163 | 0.004322 | 0.04872  | 1770 | - && - && PF02469:Fasciclin domain                                                                                                                                                                                                                                                                                                                                             |
| Lachesis_group0__13_contigs__l.g4298 | 885.9537 | 2450.505 | -1.46775 | 0.00071  | 0.01606  | 1020 | - && P0CN61.1 RecName: Full=Probable electron transfer flavoprotein subunit alpha, mitochondrial; Short=Alpha-ETF; Flags: Precursor >P0CN60.1 RecName: Full=Probable electron transfer flavoprotein subunit alpha, mitochondrial; Short=Alpha-ETF; Flags: Precursor && PF00766:Electron transfer flavoprotein FAD-binding domain PF01012:Electron transfer flavoprotein domain |

|                                       |          |          |          |          |          |      |                                                                                                                                                                                                                                                                                                 |
|---------------------------------------|----------|----------|----------|----------|----------|------|-------------------------------------------------------------------------------------------------------------------------------------------------------------------------------------------------------------------------------------------------------------------------------------------------|
| Lachesis_group0__13_contigs__l.g6885  | 369.183  | 1022.969 | -1.47056 | 0.000209 | 0.006998 | 1770 | - && P40186.3 RecName: Full=PHO85 cyclin-7; AltName: Full=PHO85-associated protein 1 && PF08613:Cyclin                                                                                                                                                                                          |
| Lachesis_group0__13_contigs__l.g4172  | 94.77414 | 262.6174 | -1.47105 | 0.001132 | 0.022054 | 1209 | - && Q8XJL8.1 RecName: Full=Probable serine/threonine-protein kinase CPE1738 && PF00069:Protein kinase domain                                                                                                                                                                                   |
| Lachesis_group0__13_contigs__l.g409   | 13158.61 | 36501.38 | -1.47195 | 0.000167 | 0.00601  | 1188 | - && - && PF07992:Pyridine nucleotide-disulphide oxidoreductase                                                                                                                                                                                                                                 |
| Lachesis_group0__13_contigs__l.g7775  | 440.8238 | 1222.845 | -1.47244 | 0.000512 | 0.012604 | 1590 | - && Q1JQD2.1 RecName: Full=Glutamate-rich WD repeat-containing protein 1 && PF12265:Histone-binding protein RBBP4 or subunit C of CAF1 complex                                                                                                                                                 |
| Lachesis_group0__13_contigs__l.g3417  | 78.9945  | 219.3926 | -1.47351 | 0.001508 | 0.025804 | 630  | - && - && PF08641:Kinetochore protein Mis14 like                                                                                                                                                                                                                                                |
| Lachesis_group0__13_contigs__l.g10620 | 157.0653 | 436.4349 | -1.47431 | 0.00348  | 0.042856 | 4590 | - && P08096.2 RecName: Full=DNA topoisomerase 2; AltName: Full=DNA topoisomerase II && PF00204:DNA gyrase B PF00521:DNA gyrase/topoisomerase IV, subunit A PF16898:C-terminal associated domain of TOPRIM PF02518:Histidine kinase-, DNA gyrase B-, and HSP90-like ATPase PF01751:Toprim domain |
| Lachesis_group0__13_contigs__l.g365   | 220.0329 | 611.4096 | -1.47543 | 0.00083  | 0.017879 | 1506 | - && Q6TNS2.1 RecName: Full=p21-activated protein kinase-interacting protein 1-like; AltName: Full=PAK1-interacting protein 1-like && PF00400:WD domain, G-beta repeat                                                                                                                          |
| Lachesis_group0__13_contigs__l.g5873  | 108.8421 | 302.5128 | -1.47616 | 0.000572 | 0.013558 | 474  | - && P0CR33.1 RecName: Full=Succinate dehydrogenase assembly factor 2, mitochondrial; Short=SDH assembly factor 2; Short=SDHAF2; Flags: Precursor >P0CR32.1 RecName: Full=Succinate dehydrogenase assembly factor 2, mitochondrial;                                                             |

|                                      |          |          |          |          |          |      |                                                                                                                                                                                                                                                                                                       |
|--------------------------------------|----------|----------|----------|----------|----------|------|-------------------------------------------------------------------------------------------------------------------------------------------------------------------------------------------------------------------------------------------------------------------------------------------------------|
|                                      |          |          |          |          |          |      | Short=SDH assembly factor 2; Short=SDHAF2; Flags: Precursor && PF03937:Flavinator of succinate dehydrogenase                                                                                                                                                                                          |
| Lachesis_group0__13_contigs__l.g9241 | 162.7886 | 452.8794 | -1.47637 | 0.000997 | 0.020307 | 2349 | - && O75001.1 RecName: Full=DNA replication licensing factor mcm7; AltName: Full=Minichromosome maintenance protein 7 && PF00493:MCM2/3/5 family PF14551:MCM N-terminal domain                                                                                                                        |
| Lachesis_group0__13_contigs__l.g8240 | 229.1445 | 638.6097 | -1.47908 | 0.000305 | 0.00897  | 1209 | - && - && PF00046:Homeobox domain                                                                                                                                                                                                                                                                     |
| Lachesis_group0__13_contigs__l.g6908 | 276.6215 | 772.0361 | -1.4814  | 0.001751 | 0.027915 | 1035 | - && - && PF02777:Iron/manganese superoxide dismutases, C-terminal domain                                                                                                                                                                                                                             |
| Lachesis_group0__13_contigs__l.g1479 | 75.62574 | 211.088  | -1.48154 | 0.002291 | 0.03288  | 1263 | - && O94725.1 RecName: Full=Protein-glutamate O-methyltransferase C1393.13 && PF01937:Protein of unknown function DUF89                                                                                                                                                                               |
| Lachesis_group0__13_contigs__l.g1025 | 341.2314 | 953.8015 | -1.48292 | 0.002173 | 0.031913 | 6777 | - && Q7S1P9.3 RecName: Full=DNA repair protein rad5; AltName: Full=Mutagen-sensitive protein 41 && PF00271:Helicase conserved C-terminal domain PF00145:C-5 cytosine-specific DNA methylase PF00176:SNF2 family N-terminal domain                                                                     |
| Lachesis_group0__13_contigs__l.g5715 | 10625.78 | 29718.91 | -1.48383 | 0.004156 | 0.047417 | 3639 | - && Q96UH7.3 RecName: Full=Fructose-bisphosphate aldolase 1; Short=FBP aldolase 1; Short=FBPA 1; AltName: Full=Fructose-1,6-bisphosphate aldolase 1 && PF03069:Acetamidase/Formamidase family PF01116:Fructose-bisphosphate aldolase class-II PF03062:MBOAT, membrane-bound O-acyltransferase family |
| Lachesis_group0__13_contigs__l.g129  | 115.6536 | 323.3367 | -1.48427 | 0.000304 | 0.008944 | 1779 | - && P0CS53.1 RecName: Full=tRNA (guanine-N(7))-methyltransferase non-catalytic subunit TRM82;                                                                                                                                                                                                        |

|                                      |          |          |          |          |          |      |                                                                                                                                                                                                                                                                                                                                                                                 |
|--------------------------------------|----------|----------|----------|----------|----------|------|---------------------------------------------------------------------------------------------------------------------------------------------------------------------------------------------------------------------------------------------------------------------------------------------------------------------------------------------------------------------------------|
|                                      |          |          |          |          |          |      | AltName: Full=Transfer RNA methyltransferase 82 &&<br>-                                                                                                                                                                                                                                                                                                                         |
| Lachesis_group0__13_contigs__l.g9051 | 1148.925 | 3216.262 | -1.48514 | 6.31E-05 | 0.003042 | 6465 | - && Q9C102.1 RecName: Full=Putative glutamate synthase [NADPH]; AltName: Full=NADPH-GOGAT && PF04898:Glutamate synthase central domain PF00310:Glutamine amidotransferases class-II PF01493:GXGXX motif PF14691:Dihydropyrimidine dehydrogenase domain II, 4Fe-4S cluster PF01645:Conserved region in glutamate synthase PF07992:Pyridine nucleotide-disulphide oxidoreductase |
| Lachesis_group0__13_contigs__l.g740  | 408.2632 | 1146.353 | -1.48961 | 0.001479 | 0.025764 | 2013 | - && Q00614.1 RecName: Full=Carnitine O-acetyltransferase, mitochondrial; Short=Carnitine acetylase; Flags: Precursor && PF00755:Choline/Carnitine o-acyltransferase                                                                                                                                                                                                            |
| Lachesis_group0__13_contigs__l.g375  | 341.389  | 962.3651 | -1.49566 | 0.000197 | 0.006685 | 1593 | - && Q7ZXK9.1 RecName: Full=Notchless protein homolog 1 && PF08154:NLE (NUC135) domain PF00400:WD domain, G-beta repeat                                                                                                                                                                                                                                                         |
| Lachesis_group0__13_contigs__l.g4481 | 115.5401 | 325.9633 | -1.49643 | 0.000555 | 0.013256 | 1329 | - && Q9HDX2.1 RecName: Full=Uncharacterized lactate 2-monooxygenase PB1A11.03 && PF01070:FMN-dependent dehydrogenase                                                                                                                                                                                                                                                            |
| Lachesis_group0__13_contigs__l.g4022 | 351.558  | 992.3629 | -1.49761 | 0.001594 | 0.026616 | 1518 | - && - && PF02845:CUE domain                                                                                                                                                                                                                                                                                                                                                    |
| Lachesis_group0__13_contigs__l.g2127 | 1709.371 | 4834.55  | -1.49997 | 0.001249 | 0.0234   | 993  | - && P47818.1 RecName: Full=Protein CCC1; AltName: Full=Cross-complementer of CSG1 protein 1 && PF01988:VIT family                                                                                                                                                                                                                                                              |
| Lachesis_group0__13_contigs__l.g9563 | 142.529  | 403.8223 | -1.504   | 0.003692 | 0.043943 | 837  | - && - && PF08208:DNA-directed RNA polymerase I subunit RPA34.5                                                                                                                                                                                                                                                                                                                 |

|                                       |          |          |          |          |          |      |                                                                                                                                                                                                                                                                                                                                 |
|---------------------------------------|----------|----------|----------|----------|----------|------|---------------------------------------------------------------------------------------------------------------------------------------------------------------------------------------------------------------------------------------------------------------------------------------------------------------------------------|
| Lachesis_group0__13_contigs__l.g7952  | 437.1153 | 1239.698 | -1.50432 | 0.00033  | 0.009465 | 1236 | - && Q553X7.1 RecName: Full=UDP-glucose 4-epimerase; AltName: Full=Galactowaldenase; AltName: Full=UDP-N-acetylglucosamine 4-epimerase; Short=UDP-GlcNAc 4-epimerase; AltName: Full=UDP-galactosamine 4-epimerase; Short=UDP-GalNAc 4-epimerase; AltName: Full=UDP-galactose 4-epimerase && PF16363:GDP-mannose 4,6 dehydratase |
| Lachesis_group0__13_contigs__l.g11398 | 1075.318 | 3050.217 | -1.50432 | 0.000211 | 0.007026 | 2682 | - && O60161.1 RecName: Full=U3 small nucleolar RNA-associated protein 4; Short=U3 snoRNA-associated protein 4; AltName: Full=U3 protein 4 required for transcription && -                                                                                                                                                       |
| Lachesis_group0__13_contigs__l.g2246  | 2875.734 | 8177.109 | -1.50761 | 0.000796 | 0.017384 | 1671 | - && P9WGQ4.1 RecName: Full=Uncharacterized oxidoreductase MT0954 >P9WGQ5.1 RecName: Full=Uncharacterized oxidoreductase Rv0927c && PF13561:Enoyl-(Acyl carrier protein) reductase PF00106:short chain dehydrogenase PF01596:O-methyltransferase                                                                                |
| Lachesis_group0__13_contigs__l.g8691  | 163.0328 | 463.8924 | -1.50951 | 0.000429 | 0.011142 | 1098 | - && Q54S38.2 RecName: Full=Probable RNA 3'-terminal phosphate cyclase-like protein && PF01137:RNA 3'-terminal phosphate cyclase PF05189:RNA 3'-terminal phosphate cyclase (RTC), insert domain                                                                                                                                 |
| Lachesis_group0__13_contigs__l.g9202  | 40.84483 | 116.4049 | -1.51072 | 0.000198 | 0.006685 | 2436 | - && P41410.2 RecName: Full=DNA repair protein rhp54; AltName: Full=RAD54 homolog 1 && PF08658:Rad54 N terminal PF00176:SNF2 family N-terminal domain PF00271:Helicase conserved C-terminal domain                                                                                                                              |

|                                       |          |          |          |          |          |      |                                                                                                                                                                                                                                                                                                                                                                                                               |
|---------------------------------------|----------|----------|----------|----------|----------|------|---------------------------------------------------------------------------------------------------------------------------------------------------------------------------------------------------------------------------------------------------------------------------------------------------------------------------------------------------------------------------------------------------------------|
| Lachesis_group0__13_contigs__l.g6933  | 155.4746 | 442.8372 | -1.51085 | 0.000227 | 0.00734  | 1146 | - && O74777.1 RecName: Full=KRR1 small subunit processome component homolog; AltName: Full=KRR-R motif-containing protein 1; AltName: Full=Ribosomal RNA assembly protein mis3 && -                                                                                                                                                                                                                           |
| Lachesis_group0__13_contigs__l.g6965  | 359.3582 | 1024.194 | -1.51127 | 0.001471 | 0.025764 | 3237 | - && P33520.1 RecName: Full=Cell division cycle-related protein res1/sct1; AltName: Full=p72sct1 && PF13637:Ankyrin repeats (many copies) PF13857:Ankyrin repeats (many copies)                                                                                                                                                                                                                               |
| Lachesis_group0__13_contigs__l.g3902  | 617.2383 | 1759.73  | -1.51181 | 0.000697 | 0.015942 | 4077 | - && O14228.1 RecName: Full=Probable phosphoribosylformylglycinamidine synthase; Short=FGAM synthase; Short=FGAMS; AltName: Full=Formylglycinamide ribonucleotide amidotransferase; Short=FGAR amidotransferase; Short=FGAR-AT; AltName: Full=Formylglycinamide ribotide amidotransferase && PF13507:CobB/CobQ-like glutamine amidotransferase domain PF02769:AIR synthase related protein, C-terminal domain |
| Lachesis_group0__13_contigs__l.g2385  | 75.67279 | 216.7156 | -1.51719 | 0.000303 | 0.008944 | 1035 | - && Q4R0J7.1 RecName: Full=D-arabinitol dehydrogenase 1; AltName: Full=NADP-dependent D-arabitol dehydrogenase && PF16912:Glucose dehydrogenase C-terminus PF08240:Alcohol dehydrogenase GroES-like domain                                                                                                                                                                                                   |
| Lachesis_group0__13_contigs__l.g10832 | 570.3131 | 1632.336 | -1.51736 | 0.00012  | 0.00475  | 1794 | - && P78750.3 RecName: Full=Probable U3 small nucleolar RNA-associated protein 18; Short=U3 snoRNA-associated protein 18 && -                                                                                                                                                                                                                                                                                 |
| Lachesis_group0__13_contigs__l.g10984 | 608.3792 | 1752.184 | -1.52639 | 0.000566 | 0.013446 | 972  | - && O74919.1 RecName: Full=RNA-binding protein rnc1; AltName: Full=RNA-binding protein that                                                                                                                                                                                                                                                                                                                  |

|                                      |          |          |          |          |          |      |                                                                                                                                                                                                                                                                                                                                                               |
|--------------------------------------|----------|----------|----------|----------|----------|------|---------------------------------------------------------------------------------------------------------------------------------------------------------------------------------------------------------------------------------------------------------------------------------------------------------------------------------------------------------------|
|                                      |          |          |          |          |          |      | suppresses calcineurin deletion 1 && PF00013:KH domain                                                                                                                                                                                                                                                                                                        |
| Lachesis_group0__13_contigs__l.g6720 | 1155.068 | 3331.528 | -1.52838 | 0.000713 | 0.016088 | 2298 | - && Q9UT19.1 RecName: Full=Probable 5-methyltetrahydropteroyltriglutamate--homocysteine methyltransferase; AltName: Full=Cobalamin-independent methionine synthase; AltName: Full=Methionine synthase, vitamin-B12 independent isozyme && PF08267:Cobalamin-independent synthase, N-terminal domain PF01717:Cobalamin-independent synthase, Catalytic domain |
| Lachesis_group0__13_contigs__l.g5790 | 149.678  | 431.5852 | -1.52872 | 0.001735 | 0.027854 | 1764 | - && O13345.1 RecName: Full=O-methylsterigmatocystin oxidoreductase; Short=OMST oxidoreductase; AltName: Full=Aflatoxin B synthase; AltName: Full=Aflatoxin biosynthesis protein Q; AltName: Full=Cytochrome P450 64 && PF00067:Cytochrome P450                                                                                                               |
| Lachesis_group0__13_contigs__l.g6672 | 110.3096 | 318.9973 | -1.53284 | 0.000747 | 0.016582 | 1632 | - && Q3UFB2.2 RecName: Full=Box C/D snoRNA protein 1; AltName: Full=Zinc finger HIT domain-containing protein 6 && PF04438:HIT zinc finger                                                                                                                                                                                                                    |
| Lachesis_group0__13_contigs__l.g1279 | 16.48983 | 47.80343 | -1.54063 | 0.00426  | 0.048315 | 900  | - && - && PF01328:Peroxidase, family 2                                                                                                                                                                                                                                                                                                                        |
| Lachesis_group0__13_contigs__l.g5549 | 41.56548 | 121.276  | -1.54773 | 0.002106 | 0.031301 | 807  | - && - && PF10197:N-terminal domain of CBF1 interacting co-repressor CIR                                                                                                                                                                                                                                                                                      |
| Lachesis_group0__13_contigs__l.g3907 | 140.5508 | 411.3351 | -1.55054 | 0.001118 | 0.021898 | 1695 | - && - && PF12937:F-box-like                                                                                                                                                                                                                                                                                                                                  |
| Lachesis_group0__13_contigs__l.g5672 | 261.0913 | 765.2675 | -1.55196 | 0.00105  | 0.021054 | 801  | - && P0CS81.1 RecName: Full=tRNA (guanine-N(7))-methyltransferase; AltName: Full=Transfer RNA methyltransferase 8; AltName: Full=tRNA (guanine(46)-N(7))-methyltransferase; AltName: Full=tRNA(m7G46)-methyltransferase >P0CS80.1                                                                                                                             |



|                                      |          |          |          |          |          |      |                                                                                                                                                                                                                                                                                                                                                                                                                      |
|--------------------------------------|----------|----------|----------|----------|----------|------|----------------------------------------------------------------------------------------------------------------------------------------------------------------------------------------------------------------------------------------------------------------------------------------------------------------------------------------------------------------------------------------------------------------------|
|                                      |          |          |          |          |          |      | RecName: Full=tRNA (guanine-N(7))-methyltransferase; AltName: Full=Transfer RNA methyltransferase 8; AltName: Full=tRNA (guanine(46)-N(7))-methyltransferase; AltName: Full=tRNA(m7G46)-methyltransferase && PF02390:Putative methyltransferase                                                                                                                                                                      |
| Lachesis_group0__13_contigs__l.g3554 | 60.58245 | 177.7111 | -1.55282 | 0.004178 | 0.047497 | 753  | - && Q9P7C8.1 RecName: Full=DNA replication complex GINS protein sld5 && PF16922:DNA replication complex GINS protein SLD5 C-terminus                                                                                                                                                                                                                                                                                |
| Lachesis_group0__13_contigs__l.g4302 | 642.2169 | 1885.443 | -1.55405 | 7.06E-05 | 0.00326  | 3756 | - && Q12754.1 RecName: Full=Ribosomal RNA-processing protein 12 && PF08161:NUC173 domain                                                                                                                                                                                                                                                                                                                             |
| Lachesis_group0__13_contigs__l.g9455 | 4598.645 | 13510.52 | -1.55481 | 0.000762 | 0.016781 | 1521 | - && P78567.3 RecName: Full=Histone H2B && PF00125:Core histone H2A/H2B/H3/H4                                                                                                                                                                                                                                                                                                                                        |
| Lachesis_group0__13_contigs__l.g8137 | 125.8644 | 369.832  | -1.55649 | 0.000368 | 0.01003  | 1389 | - && P0CS07.1 RecName: Full=tRNA (adenine(58)-N(1))-methyltransferase non-catalytic subunit TRM6; AltName: Full=tRNA(m1A58)-methyltransferase subunit TRM6; Short=tRNA(m1A58)MTase subunit TRM6 >P0CS06.1 RecName: Full=tRNA (adenine(58)-N(1))-methyltransferase non-catalytic subunit TRM6; AltName: Full=tRNA(m1A58)-methyltransferase subunit TRM6; Short=tRNA(m1A58)MTase subunit TRM6 && PF04189:Gcd10p family |
| Lachesis_group0__13_contigs__l.g3985 | 519.5361 | 1534.33  | -1.56244 | 0.000592 | 0.013931 | 1209 | - && - && PF09729:Gti1/Pac2 family                                                                                                                                                                                                                                                                                                                                                                                   |
| Lachesis_group0__13_contigs__l.g117  | 25.96956 | 76.90079 | -1.56603 | 0.001985 | 0.030369 | 1779 | - && Q828K5.1 RecName: Full=Glycerol kinase 1; AltName: Full=ATP:glycerol 3-phosphotransferase 1; AltName: Full=Glycerokinase 1; Short=GK 1 && PF02782:FGGY family of carbohydrate kinases, C-                                                                                                                                                                                                                       |

|                                       |          |          |          |          |          |      |                                                                                                                                                                                            |
|---------------------------------------|----------|----------|----------|----------|----------|------|--------------------------------------------------------------------------------------------------------------------------------------------------------------------------------------------|
|                                       |          |          |          |          |          |      | terminal domain PF00370:FGGY family of carbohydrate kinases, N-terminal domain                                                                                                             |
| Lachesis_group0__13_contigs__l.g6280  | 129.8918 | 384.7747 | -1.56825 | 0.000288 | 0.008697 | 588  | - && - && PF14615:Ribosome-assembly protein 3                                                                                                                                              |
| Lachesis_group0__13_contigs__l.g4114  | 84.20261 | 250.1047 | -1.57122 | 0.003938 | 0.045559 | 1482 | - && Q10475.1 RecName: Full=Eukaryotic translation initiation factor 4 gamma; Short=eIF-4-gamma; Short=eIF-4G && PF02854:MIF4G domain PF12152:Eukaryotic translation initiation factor 4G1 |
| Lachesis_group0__13_contigs__l.g6892  | 1066.369 | 3173.925 | -1.57374 | 0.000183 | 0.006428 | 2034 | - && P40010.1 RecName: Full=Nuclear GTP-binding protein NUG1; AltName: Full=Nuclear GTPase 1 && PF01926:50S ribosome-binding GTPase PF08701:GNL3L/Grn1 putative GTPase                     |
| Lachesis_group0__13_contigs__l.g5917  | 2347.871 | 6999.222 | -1.57588 | 4.02E-06 | 0.00047  | 1050 | - && - && PF03036:Perilipin family                                                                                                                                                         |
| Lachesis_group0__13_contigs__l.g448   | 4341.377 | 12944.96 | -1.57617 | 0.001284 | 0.023904 | 1776 | - && Q9HGX4.3 RecName: Full=Histone H2A && PF00125:Core histone H2A/H2B/H3/H4 PF14622:Ribonuclease-III-like PF16211:C-terminus of histone H2A PF00035:Double-stranded RNA binding motif    |
| Lachesis_group0__13_contigs__l.g6835  | 916.6891 | 2733.887 | -1.57656 | 0.000543 | 0.01305  | 1665 | - && P28745.2 RecName: Full=Protein pim1; AltName: Full=Poly(A)+ RNA transport protein 2 && PF00415:Regulator of chromosome condensation (RCC1) repeat                                     |
| Lachesis_group0__13_contigs__l.g9173  | 80.01462 | 239.8701 | -1.58406 | 0.001869 | 0.029189 | 1332 | - && Q6C656.1 RecName: Full=Chromosome segregation in meiosis protein 3 && PF07962:Replication Fork Protection Component Swi3                                                              |
| Lachesis_group0__13_contigs__l.g10811 | 2076.898 | 6226.551 | -1.58411 | 0.000634 | 0.014659 | 1239 | - && P47176.1 RecName: Full=Branched-chain-amino-acid aminotransferase, cytosolic; Short=BCAT;                                                                                             |

|                                      |          |          |          |          |          |      |                                                                                                                                                                                         |
|--------------------------------------|----------|----------|----------|----------|----------|------|-----------------------------------------------------------------------------------------------------------------------------------------------------------------------------------------|
|                                      |          |          |          |          |          |      | AltName: Full=Protein TWT2 && PF01063:Amino-transferase class IV                                                                                                                        |
| Lachesis_group0__13_contigs__l.g466  | 220.2166 | 660.3241 | -1.58518 | 0.000318 | 0.009162 | 1467 | - && Q4PHV3.1 RecName: Full=Pre-rRNA-processing protein IPI3 && -                                                                                                                       |
| Lachesis_group0__13_contigs__l.g3357 | 117.1225 | 351.3517 | -1.58557 | 0.000688 | 0.015796 | 2286 | - && - && PF00069:Protein kinase domain                                                                                                                                                 |
| Lachesis_group0__13_contigs__l.g9052 | 74.33679 | 223.325  | -1.58838 | 0.000423 | 0.011039 | 1140 | - && - && PF13878:zinc-finger of acetyl-transferase ESCO PF13880:ESCO1/2 acetyl-transferase                                                                                             |
| Lachesis_group0__13_contigs__l.g8683 | 1021.431 | 3096.205 | -1.60009 | 0.000387 | 0.010428 | 759  | - && P38523.1 RecName: Full=GrpE protein homolog, mitochondrial; Flags: Precursor && PF01025:GrpE                                                                                       |
| Lachesis_group0__13_contigs__l.g932  | 412.5452 | 1251.099 | -1.60065 | 4.98E-05 | 0.002538 | 801  | - && - && PF13279:Thioesterase-like superfamily                                                                                                                                         |
| Lachesis_group0__13_contigs__l.g9428 | 390.5605 | 1185.818 | -1.60234 | 0.001806 | 0.028487 | 969  | - && O74741.2 RecName: Full=4,5-DOPA dioxygenase extradiol-like protein && PF02900:Catalytic LigB subunit of aromatic ring-opening dioxygenase                                          |
| Lachesis_group0__13_contigs__l.g138  | 565.2074 | 1719.992 | -1.60594 | 0.000369 | 0.01003  | 4479 | - && Q4P7M1.1 RecName: Full=ATP-dependent RNA helicase DBP9 && PF00270:DEAD/DEAH box helicase PF00271:Helicase conserved C-terminal domain                                              |
| Lachesis_group0__13_contigs__l.g1296 | 475.2896 | 1446.68  | -1.60608 | 0.000278 | 0.008463 | 1386 | - && C5PEI9.1 RecName: Full=Aspartic protease PEP3; Flags: Precursor && PF00026:Eukaryotic aspartyl protease                                                                            |
| Lachesis_group0__13_contigs__l.g165  | 310.8304 | 946.2483 | -1.60671 | 7.59E-05 | 0.003385 | 3171 | - && O36021.1 RecName: Full=Uncharacterized protein C4F10.09c && PF03914:CBF/Mak21 family                                                                                               |
| Lachesis_group0__13_contigs__l.g2375 | 833.3991 | 2541.314 | -1.60875 | 0.000418 | 0.011018 | 1932 | - && O42644.1 RecName: Full=CTP synthase; AltName: Full=CTP synthetase; AltName: Full=UTP--ammonia ligase && PF06418:CTP synthase N-terminus PF00117:Glutamine amidotransferase class-I |
| Lachesis_group0__13_contigs__l.g3516 | 1009.002 | 3079.805 | -1.61003 | 0.00015  | 0.005572 | 1794 | - && O94300.1 RecName: Full=Putative xanthine/uracil permease C887.17 && PF00860:Permease family                                                                                        |

|                                       |          |          |          |          |          |      |                                                                                                                                                                                                                                                                              |
|---------------------------------------|----------|----------|----------|----------|----------|------|------------------------------------------------------------------------------------------------------------------------------------------------------------------------------------------------------------------------------------------------------------------------------|
| Lachesis_group0__13_contigs__l.g2514  | 453.4909 | 1385.401 | -1.61139 | 4.40E-05 | 0.002353 | 1356 | - && B0DWM8.1 RecName: Full=Ribosome biogenesis protein YTM1 && PF08154:NLE (NUC135) domain                                                                                                                                                                                  |
| Lachesis_group0__13_contigs__l.g4542  | 79.7189  | 244.1378 | -1.61461 | 0.001939 | 0.030022 | 1317 | - && O59790.2 RecName: Full=Serine/threonine-protein kinase ark1; AltName: Full=Aurora-related kinase 1 && PF00069:Protein kinase domain                                                                                                                                     |
| Lachesis_group0__13_contigs__l.g5995  | 99.81048 | 305.8414 | -1.61674 | 0.000499 | 0.012331 | 2304 | - && P41889.2 RecName: Full=Anaphase-promoting complex subunit cut9; AltName: Full=20S cyclosome/APC complex protein cut9; AltName: Full=Cell untimely torn protein 9 && PF12895:Anaphase-promoting complex, cyclosome, subunit 3 PF13424:Tetratricopeptide repeat           |
| Lachesis_group0__13_contigs__l.g10027 | 141.358  | 433.8672 | -1.61815 | 0.000532 | 0.012853 | 2718 | - && P40377.1 RecName: Full=DNA replication licensing factor mcm2; AltName: Full=Cell division control protein 19; AltName: Full=Minichromosome maintenance protein 2 && PF12619:Mini-chromosome maintenance protein 2 PF00493:MCM2/3/5 family PF14551:MCM N-terminal domain |
| Lachesis_group0__13_contigs__l.g2057  | 117.655  | 361.7031 | -1.61929 | 0.000117 | 0.004683 | 1098 | - && - && PF05368:NmrA-like family                                                                                                                                                                                                                                           |
| Lachesis_group0__13_contigs__l.g8222  | 738.8266 | 2276.862 | -1.62356 | 1.68E-06 | 0.000247 | 2214 | - && Q8TB72.2 RecName: Full=Pumilio homolog 2; Short=Pumilio-2 && -                                                                                                                                                                                                          |
| Lachesis_group0__13_contigs__l.g11369 | 3063.992 | 9448.926 | -1.62478 | 8.89E-05 | 0.003773 | 1920 | - && Q9P7H3.1 RecName: Full=Prohibitin-1 && PF00076:RNA recognition motif. (a.k.a. RRM, RBD, or RNP domain) PF01145:SPFH domain / Band 7 family                                                                                                                              |
| Lachesis_group0__13_contigs__l.g8645  | 776.6874 | 2395.515 | -1.62511 | 0.0002   | 0.00673  | 381  | - && P0CQ53.1 RecName: Full=13 kDa ribonucleoprotein-associated protein >P0CQ52.1 RecName: Full=13 kDa ribonucleoprotein-associated protein && PF01248:Ribosomal protein L7Ae/L30e/S12e/Gadd45 family                                                                        |

|                                       |          |          |          |          |          |      |                                                                                                                                                                                                                                                                                                                                                                                 |
|---------------------------------------|----------|----------|----------|----------|----------|------|---------------------------------------------------------------------------------------------------------------------------------------------------------------------------------------------------------------------------------------------------------------------------------------------------------------------------------------------------------------------------------|
| Lachesis_group0__13_contigs__l.g4599  | 48.24326 | 148.7744 | -1.62581 | 0.001498 | 0.025804 | 1476 | - && P38121.1 RecName: Full=DNA polymerase alpha subunit B; AltName: Full=DNA polymerase I subunit B; AltName: Full=DNA polymerase alpha:primase complex p86 subunit; Short=Pol alpha-primase complex p86 subunit; AltName: Full=DNA polymerase-primase complex p74 subunit && PF04042:DNA polymerase alpha/epsilon subunit B PF08418:DNA polymerase alpha subunit B N-terminal |
| Lachesis_group0__13_contigs__l.g4533  | 281.7834 | 871.7198 | -1.62912 | 0.002745 | 0.036066 | 816  | - && Q9DCW4.3 RecName: Full=Electron transfer flavoprotein subunit beta; Short=Beta-ETF && PF01012:Electron transfer flavoprotein domain                                                                                                                                                                                                                                        |
| Lachesis_group0__13_contigs__l.g11296 | 529.3742 | 1651.165 | -1.64145 | 8.10E-06 | 0.000759 | 1842 | - && - && PF01490:Transmembrane amino acid transporter protein                                                                                                                                                                                                                                                                                                                  |
| Lachesis_group0__13_contigs__l.g10934 | 216.5559 | 675.3659 | -1.64163 | 1.83E-05 | 0.001271 | 3729 | - && Q04217.1 RecName: Full=Probable ATP-dependent RNA helicase DHR1; AltName: Full=DEAH box RNA helicase DHR1; AltName: Full=Extracellular mutant protein 16 && PF07717:Oligonucleotide/oligosaccharide-binding (OB)-fold PF00270:DEAD/DEAH box helicase PF00271:Helicase conserved C-terminal domain PF04408:Helicase associated domain (HA2)                                 |
| Lachesis_group0__13_contigs__l.g8694  | 51.21698 | 160.0147 | -1.64402 | 0.003665 | 0.043921 | 1278 | - && O08760.2 RecName: Full=N-glycosylase/DNA lyase; Includes: RecName: Full=8-oxoguanine DNA glycosylase; Includes: RecName: Full=DNA-(apurinic or apyrimidinic site) lyase; Short=AP lyase && PF07934:8-oxoguanine DNA glycosylase, N-terminal                                                                                                                                |

|                                       |          |          |          |          |          |      |                                                                                                                                                                                                                                                                                                         |
|---------------------------------------|----------|----------|----------|----------|----------|------|---------------------------------------------------------------------------------------------------------------------------------------------------------------------------------------------------------------------------------------------------------------------------------------------------------|
|                                       |          |          |          |          |          |      | domain PF00730:HhH-GPD superfamily base excision DNA repair protein                                                                                                                                                                                                                                     |
| Lachesis_group0__13_contigs__l.g8808  | 35.67034 | 111.6031 | -1.6446  | 0.002292 | 0.03288  | 1119 | - && Q09843.1 RecName: Full=Replication factor C subunit 2; Short=Replication factor C2; AltName: Full=Activator 1 41 kDa subunit && PF08542:Replication factor C C-terminal domain PF00004:ATPase family associated with various cellular activities (AAA)                                             |
| Lachesis_group0__13_contigs__l.g1178  | 53.72544 | 167.981  | -1.64514 | 0.004477 | 0.049896 | 1881 | - && - && PF01753:MYND finger                                                                                                                                                                                                                                                                           |
| Lachesis_group0__13_contigs__l.g7977  | 206.227  | 646.3695 | -1.64831 | 3.50E-05 | 0.001939 | 1389 | - && O74731.1 RecName: Full=tRNA-dihydrouridine(20) synthase [NAD(P)+]; AltName: Full=tRNA-dihydrouridine synthase 2 && PF01207:Dihydrouridine synthase (Dus)                                                                                                                                           |
| Lachesis_group0__13_contigs__l.g4810  | 37.86216 | 118.9384 | -1.65219 | 0.001575 | 0.026446 | 1398 | - && - && PF01231:Indoleamine 2,3-dioxygenase                                                                                                                                                                                                                                                           |
| Lachesis_group0__13_contigs__l.g6436  | 254.9878 | 802.8711 | -1.65551 | 0.000299 | 0.008877 | 849  | - && Q0VD01.1 RecName: Full=U3 small nucleolar ribonucleoprotein protein IMP4; Short=U3 snoRNP protein IMP4 && PF04427:Brix domain                                                                                                                                                                      |
| Lachesis_group0__13_contigs__l.g362   | 96.48354 | 304.1346 | -1.65762 | 0.000391 | 0.010476 | 1620 | - && Q9HFE6.1 RecName: Full=Uncharacterized RNA-binding protein P16F5.06 && -                                                                                                                                                                                                                           |
| Lachesis_group0__13_contigs__l.g9084  | 50.12666 | 158.1534 | -1.66006 | 0.001222 | 0.023072 | 3285 | - && - && PF08457:Sfi1 spindle body protein                                                                                                                                                                                                                                                             |
| Lachesis_group0__13_contigs__l.g10689 | 123.0027 | 389.1893 | -1.66262 | 7.58E-05 | 0.003385 | 1047 | - && Q8YVU6.2 RecName: Full=Porphobilinogen deaminase; Short=PBG; AltName: Full=Hydroxymethylbilane synthase; Short=HMBS; AltName: Full=Pre-uroporphyrinogen synthase && PF03900:Porphobilinogen deaminase, C-terminal domain PF01379:Porphobilinogen deaminase, dipyrromethane cofactor binding domain |

|                                       |          |          |          |          |          |      |                                                                                                                                                                                                                                                                      |
|---------------------------------------|----------|----------|----------|----------|----------|------|----------------------------------------------------------------------------------------------------------------------------------------------------------------------------------------------------------------------------------------------------------------------|
| Lachesis_group0__13_contigs__l.g5780  | 422.9241 | 1339.878 | -1.66375 | 0.001391 | 0.025053 | 2025 | - && P42670.1 RecName: Full=Puromycin resistance protein pur8 && PF07690:Major Facilitator Superfamily                                                                                                                                                               |
| Lachesis_group0__13_contigs__l.g11270 | 696.5009 | 2209.559 | -1.66585 | 0.000221 | 0.007243 | 1644 | - && O74407.1 RecName: Full=Aspartate--tRNA ligase, cytoplasmic; AltName: Full=Aspartyl-tRNA synthetase; Short=AspRS && PF01336:OB-fold nucleic acid binding domain PF00152:tRNA synthetases class II (D, K and N)                                                   |
| Lachesis_group0__13_contigs__l.g11244 | 50.88764 | 162.1925 | -1.67182 | 0.000631 | 0.014659 | 3738 | - && Q1MTN3.2 RecName: Full=Inner centromere protein-related protein pic1; Short=INCENP-related protein pic1 && PF03941:Inner centromere protein, ARK binding region                                                                                                 |
| Lachesis_group0__13_contigs__l.g8419  | 19.86382 | 63.11099 | -1.67299 | 0.001961 | 0.030126 | 363  | - && P0CM85.1 RecName: Full=Cytochrome c oxidase assembly protein COX16, mitochondrial; Flags: Precursor >P0CM84.1 RecName: Full=Cytochrome c oxidase assembly protein COX16, mitochondrial; Flags: Precursor && PF14138:Cytochrome c oxidase assembly protein COX16 |
| Lachesis_group0__13_contigs__l.g5204  | 284.4165 | 907.7498 | -1.67474 | 2.19E-05 | 0.001435 | 1143 | - && Q1MTN8.2 RecName: Full=Probable assembly chaperone of rpl4 && PF14559:Tetratricopeptide repeat                                                                                                                                                                  |
| Lachesis_group0__13_contigs__l.g2258  | 117.239  | 374.6903 | -1.67618 | 5.29E-05 | 0.00265  | 3666 | - && P0CR92.1 RecName: Full=Topoisomerase 1-associated factor 1 && PF05029:Timeless protein C terminal region PF04821:Timeless protein                                                                                                                               |
| Lachesis_group0__13_contigs__l.g10    | 6545.29  | 20925.79 | -1.67675 | 0.002743 | 0.036066 | 1548 | - && P07871.2 RecName: Full=3-ketoacyl-CoA thiolase B, peroxisomal; AltName: Full=Acetyl-CoA acyltransferase B; AltName: Full=Beta-ketothiolase B; AltName: Full=Peroxisomal 3-oxoacyl-CoA thiolase B;                                                               |

|                                       |          |          |          |          |          |      |                                                                                                                                                                                                                          |
|---------------------------------------|----------|----------|----------|----------|----------|------|--------------------------------------------------------------------------------------------------------------------------------------------------------------------------------------------------------------------------|
|                                       |          |          |          |          |          |      | Flags: Precursor && PF00108:Thiolase, N-terminal domain PF02803:Thiolase, C-terminal domain                                                                                                                              |
| Lachesis_group0__13_contigs__l.g2330  | 290.1429 | 928.7242 | -1.67871 | 5.60E-06 | 0.000603 | 1503 | - && Q874L4.1 RecName: Full=Vitamin B6 transporter TPN1; AltName: Full=Transport of pyridoxine protein 1 && PF02133:Permease for cytosine/purines, uracil, thiamine, allantoin                                           |
| Lachesis_group0__13_contigs__l.g817   | 186.9316 | 599.0814 | -1.68004 | 0.002276 | 0.032806 | 1779 | - && Q70J59.1 RecName: Full=Tripeptidyl-peptidase sed2; AltName: Full=Sedolisin-B; Flags: Precursor && PF09286:Pro-kumamolisin, activation domain PF00082:Subtilase family                                               |
| Lachesis_group0__13_contigs__l.g7938  | 298.5988 | 956.7053 | -1.68041 | 7.44E-05 | 0.003365 | 1764 | - && O14360.1 RecName: Full=H/ACA ribonucleoprotein complex non-core subunit NAF1; AltName: Full=Nuclear assembly factor 1 && PF04410:Gar1/Naf1 RNA binding region                                                       |
| Lachesis_group0__13_contigs__l.g8375  | 15.34052 | 49.09317 | -1.68103 | 0.003533 | 0.043156 | 1092 | - && - && PF12697:Alpha/beta hydrolase family                                                                                                                                                                            |
| Lachesis_group0__13_contigs__l.g5212  | 2018.678 | 6481.724 | -1.68298 | 0.000348 | 0.009761 | 1251 | - && O13982.1 RecName: Full=Uncharacterized WD repeat-containing protein C25H1.08c && PF00400:WD domain, G-beta repeat                                                                                                   |
| Lachesis_group0__13_contigs__l.g10384 | 147.1681 | 472.6681 | -1.68397 | 0.000373 | 0.010093 | 1980 | - && Q99741.1 RecName: Full=Cell division control protein 6 homolog; AltName: Full=CDC6-related protein; AltName: Full=Cdc18-related protein; Short=HsCdc18; AltName: Full=p62(cdc6); Short=HsCDC6 && PF13401:AAA domain |
| Lachesis_group0__13_contigs__l.g1508  | 451.9293 | 1456.397 | -1.68858 | 2.47E-05 | 0.001543 | 2034 | - && Q3SYU1.1 RecName: Full=Nucleolar complex protein 2 homolog; Short=Protein NOC2 homolog; AltName: Full=NOC2-like protein; AltName: Full=Novel INHAT repressor && PF03715:Noc2p family                                |



|                                       |          |          |          |          |          |      |                                                                                                                                                                                                                   |
|---------------------------------------|----------|----------|----------|----------|----------|------|-------------------------------------------------------------------------------------------------------------------------------------------------------------------------------------------------------------------|
| Lachesis_group0__13_contigs__l.g11694 | 32.71455 | 106.0267 | -1.69408 | 0.000707 | 0.01606  | 741  | - && - && PF00808:Histone-like transcription factor (CBF/NF-Y) and archaeal histone                                                                                                                               |
| Lachesis_group0__13_contigs__l.g7753  | 487.5982 | 1579.43  | -1.69588 | 0.000196 | 0.006685 | 1677 | - && P87153.1 RecName: Full=Probable T-complex protein 1 subunit eta; Short=TCP-1-eta; AltName: Full=CCT-eta && PF00118:TCP-1/cpn60 chaperonin family                                                             |
| Lachesis_group0__13_contigs__l.g5796  | 1083.509 | 3514.115 | -1.69758 | 0.000357 | 0.0099   | 1803 | - && Q05506.1 RecName: Full=Arginine--tRNA ligase, cytoplasmic; AltName: Full=Arginyl-tRNA synthetase; Short=ArgRS && PF00750:tRNA synthetases class I (R) PF05746:DALR anticodon binding domain                  |
| Lachesis_group0__13_contigs__l.g9073  | 52.76208 | 171.8493 | -1.70454 | 0.003603 | 0.043439 | 1287 | - && - && PF12937:F-box-like                                                                                                                                                                                      |
| Lachesis_group0__13_contigs__l.g1021  | 42.70135 | 139.4972 | -1.70536 | 0.001887 | 0.029418 | 1074 | - && O14003.2 RecName: Full=Replication factor C subunit 3; Short=Replication factor C3 && PF00004:ATPase family associated with various cellular activities (AAA) PF08542:Replication factor C C-terminal domain |
| Lachesis_group0__13_contigs__l.g10640 | 981.8913 | 3207.465 | -1.70777 | 2.98E-06 | 0.000382 | 5436 | - && O77033.1 RecName: Full=General transcriptional corepressor trfA && PF13414:TPR repeat                                                                                                                        |
| Lachesis_group0__13_contigs__l.g8083  | 314.4456 | 1028.608 | -1.71035 | 0.000611 | 0.014308 | 978  | - && Q9UU99.1 RecName: Full=CRAL-TRIO domain-containing protein C23B6.04c && PF00650:CRAL/TRIO domain                                                                                                             |
| Lachesis_group0__13_contigs__l.g10018 | 13.73493 | 45.00309 | -1.71293 | 0.001551 | 0.026227 | 1284 | - && P18773.2 RecName: Full=Esterase && PF07859:alpha/beta hydrolase fold                                                                                                                                         |
| Lachesis_group0__13_contigs__l.g6437  | 93.88547 | 307.5106 | -1.71299 | 0.000118 | 0.004683 | 1407 | - && O36014.1 RecName: Full=Aspartyl aminopeptidase 1 && PF02127:Aminopeptidase I zinc metalloprotease (M18)                                                                                                      |

|                                       |          |          |          |          |          |      |                                                                                                                                                                                                                                                 |
|---------------------------------------|----------|----------|----------|----------|----------|------|-------------------------------------------------------------------------------------------------------------------------------------------------------------------------------------------------------------------------------------------------|
| Lachesis_group0__13_contigs__l.g5341  | 43.25472 | 143.0135 | -1.72543 | 0.004391 | 0.04915  | 903  | - && Q9P4T7.1 RecName: Full=Thymidylate synthase; Short=TS; Short=TSase && PF00303:Thymidylate synthase                                                                                                                                         |
| Lachesis_group0__13_contigs__l.g10132 | 560.982  | 1855.328 | -1.72596 | 5.27E-05 | 0.00265  | 2502 | - && P0CQ95.1 RecName: Full=ATP-dependent RNA helicase DBP7 >P0CQ94.1 RecName: Full=ATP-dependent RNA helicase DBP7 && PF13959:Domain of unknown function (DUF4217) PF00270:DEAD/DEAH box helicase PF00271:Helicase conserved C-terminal domain |
| Lachesis_group0__13_contigs__l.g2011  | 326.631  | 1080.604 | -1.72671 | 6.93E-05 | 0.003229 | 2781 | - && Q10155.1 RecName: Full=Ribonuclease Z 1; Short=RNase Z 1; AltName: Full=tRNA 3 endonuclease 1; AltName: Full=tRNase Z 1 && PF12706:Beta-lactamase superfamily domain PF13691:tRNase Z endonuclease                                         |
| Lachesis_group0__13_contigs__l.g5564  | 80.89956 | 268.9306 | -1.73158 | 0.001732 | 0.027854 | 1839 | - && Q8NK72.2 RecName: Full=DNA repair and recombination protein rhm52; AltName: Full=RAD52 homolog && PF04098:Rad52/22 family double-strand break repair protein                                                                               |
| Lachesis_group0__13_contigs__l.g5556  | 106.0506 | 354.8455 | -1.7432  | 0.000709 | 0.01606  | 732  | - && - && PF03070:TENA/THI-4/PQQC family                                                                                                                                                                                                        |
| Lachesis_group0__13_contigs__l.g342   | 87.366   | 292.3537 | -1.74422 | 8.61E-05 | 0.003701 | 2730 | - && Q24K12.1 RecName: Full=G patch domain-containing protein 1 && PF07713:Protein of unknown function (DUF1604) PF01585:G-patch domain                                                                                                         |
| Lachesis_group0__13_contigs__l.g2754  | 26.66706 | 89.29641 | -1.74463 | 0.000967 | 0.019961 | 1233 | - && - && PF13414:TPR repeat                                                                                                                                                                                                                    |
| Lachesis_group0__13_contigs__l.g6208  | 283.5054 | 951.1281 | -1.74697 | 0.000194 | 0.006685 | 1023 | - && A8P7Y3.1 RecName: Full=S-methyl-5'-thioadenosine phosphorylase; AltName: Full=5'-methylthioadenosine phosphorylase; Short=MTA phosphorylase; Short=MTAP; Short=MTAPase && PF01048:Phosphorylase superfamily                                |

|                                       |          |          |          |          |          |      |                                                                                                                                                                                                                                                     |
|---------------------------------------|----------|----------|----------|----------|----------|------|-----------------------------------------------------------------------------------------------------------------------------------------------------------------------------------------------------------------------------------------------------|
| Lachesis_group0__13_contigs__l.g2728  | 3837.218 | 12881.72 | -1.74719 | 0.000219 | 0.007211 | 3708 | - && - && PF00172:Fungal Zn(2)-Cys(6) binuclear cluster domain PF04082:Fungal specific transcription factor domain                                                                                                                                  |
| Lachesis_group0__13_contigs__l.g10720 | 13.41978 | 44.99739 | -1.74873 | 0.003374 | 0.041914 | 903  | - && - && PF00069:Protein kinase domain                                                                                                                                                                                                             |
| Lachesis_group0__13_contigs__l.g10436 | 71.44672 | 241.05   | -1.75465 | 0.000312 | 0.009125 | 3405 | - && Q9C107.1 RecName: Full=Minichromosome loss protein 1; AltName: Full=DNA polymerase alpha accessory factor Mcl1 && PF12341:Minichromosome loss protein, Mcl1, middle region                                                                     |
| Lachesis_group0__13_contigs__l.g1011  | 388.2843 | 1311.052 | -1.75601 | 1.14E-05 | 0.000919 | 3585 | - && O94372.1 RecName: Full=Uncharacterized protein C1604.06c && PF03914:CBF/Mak21 family                                                                                                                                                           |
| Lachesis_group0__13_contigs__l.g248   | 408.3497 | 1380.577 | -1.75759 | 2.33E-05 | 0.001488 | 2244 | - && - && PF12767:Transcriptional regulator of RNA polII, SAGA, subunit PF05132:RNA polymerase III RPC4                                                                                                                                             |
| Lachesis_group0__13_contigs__l.g8472  | 945.6683 | 3199.523 | -1.75865 | 0.000167 | 0.00601  | 1500 | - && Q51342.3 RecName: Full=Amidophosphoribosyltransferase; Short=ATase; AltName: Full=Glutamine phosphoribosylpyrophosphate amidotransferase; Short=GPATase && PF00156:Phosphoribosyl transferase domain PF13522:Glutamine amidotransferase domain |
| Lachesis_group0__13_contigs__l.g302   | 69.70746 | 235.9537 | -1.75928 | 0.000347 | 0.009761 | 1857 | - && Q5AXT5.2 RecName: Full=ATP-dependent DNA helicase PIF1; AltName: Full=DNA repair and recombination helicase PIF1 && PF05970:PIF1-like helicase                                                                                                 |
| Lachesis_group0__13_contigs__l.g10249 | 77.31647 | 262.3468 | -1.76338 | 0.000229 | 0.007361 | 2199 | - && - && PF13964:Kelch motif                                                                                                                                                                                                                       |
| Lachesis_group0__13_contigs__l.g11551 | 507.4254 | 1727.368 | -1.76741 | 6.17E-05 | 0.002993 | 1401 | - && P40510.1 RecName: Full=D-3-phosphoglycerate dehydrogenase 2; Short=3-PGDH 2 && PF00389:D-isomer specific 2-hydroxyacid dehydrogenase, catalytic                                                                                                |

|                                      |          |          |          |          |          |      |                                                                                                                                                                                                     |
|--------------------------------------|----------|----------|----------|----------|----------|------|-----------------------------------------------------------------------------------------------------------------------------------------------------------------------------------------------------|
|                                      |          |          |          |          |          |      | domain PF02826:D-isomer specific 2-hydroxyacid dehydrogenase, NAD binding domain                                                                                                                    |
| Lachesis_group0__13_contigs__l.g3864 | 83.03612 | 282.6378 | -1.7679  | 6.36E-05 | 0.003042 | 1710 | - && - && PF12937:F-box-like                                                                                                                                                                        |
| Lachesis_group0__13_contigs__l.g8303 | 146.6005 | 500.8516 | -1.77372 | 4.86E-05 | 0.002531 | 3084 | - && P87137.1 RecName: Full=Uncharacterized protein C57A7.06 && PF04615:Utp14 protein                                                                                                               |
| Lachesis_group0__13_contigs__l.g7510 | 464.7061 | 1589.867 | -1.77481 | 1.23E-05 | 0.000945 | 1689 | - && O94365.1 RecName: Full=U3 small nucleolar RNA-associated protein 15; Short=U3 snoRNA-associated protein 15; AltName: Full=U3 protein 15 required for transcription && PF09384:UTP15 C terminal |
| Lachesis_group0__13_contigs__l.g2257 | 233.7746 | 801.5374 | -1.77847 | 2.10E-05 | 0.001392 | 2394 | - && Q4P5U4.2 RecName: Full=ATP-dependent RNA helicase DBP4 && PF00270:DEAD/DEAH box helicase PF13959:Domain of unknown function (DUF4217) PF00271:Helicase conserved C-terminal domain             |
| Lachesis_group0__13_contigs__l.g5314 | 108.3433 | 372.8195 | -1.78317 | 1.18E-05 | 0.000937 | 2082 | - && Q76PD3.1 RecName: Full=ATP-dependent RNA helicase dbp6 && PF00270:DEAD/DEAH box helicase PF00271:Helicase conserved C-terminal domain                                                          |
| Lachesis_group0__13_contigs__l.g7937 | 580.8496 | 2002.032 | -1.7854  | 6.91E-05 | 0.003229 | 1032 | - && A8N2Z9.1 RecName: Full=Elongation factor Ts, mitochondrial; Short=EF-Ts; Short=EF-TsMt; Flags: Precursor && PF00889:Elongation factor TS                                                       |
| Lachesis_group0__13_contigs__l.g1359 | 1785.362 | 6179.811 | -1.79136 | 0.002442 | 0.033962 | 2835 | - && - && PF04082:Fungal specific transcription factor domain                                                                                                                                       |
| Lachesis_group0__13_contigs__l.g6468 | 293.717  | 1017.119 | -1.7923  | 6.76E-06 | 0.000687 | 876  | - && O13774.1 RecName: Full=GTP cyclohydrolase 1; AltName: Full=GTP cyclohydrolase I; Short=GTP-CH-I && PF01227:GTP cyclohydrolase I                                                                |

|                                       |          |          |          |          |          |      |                                                                                                                                                                                                                                                                                           |
|---------------------------------------|----------|----------|----------|----------|----------|------|-------------------------------------------------------------------------------------------------------------------------------------------------------------------------------------------------------------------------------------------------------------------------------------------|
| Lachesis_group0__13_contigs__l.g4415  | 72.89847 | 253.4279 | -1.79857 | 0.000313 | 0.009125 | 1533 | - && Q08220.1 RecName: Full=Glutathione synthetase; Short=GSH synthetase; Short=GSH-S; AltName: Full=Glutathione synthase && PF03917:Eukaryotic glutathione synthase, ATP binding domain PF03199:Eukaryotic glutathione synthase                                                          |
| Lachesis_group0__13_contigs__l.g11358 | 72.78497 | 253.0088 | -1.79877 | 0.000314 | 0.009125 | 3282 | - && O13921.2 RecName: Full=MutS protein homolog 1 && PF00488:MutS domain V PF05192:MutS domain III PF01624:MutS domain I PF05188:MutS domain II                                                                                                                                          |
| Lachesis_group0__13_contigs__l.g2129  | 129.9165 | 452.3228 | -1.80059 | 2.01E-05 | 0.001366 | 1668 | - && Q10286.1 RecName: Full=Myo-inositol transporter 1 && PF00083:Sugar (and other) transporter                                                                                                                                                                                           |
| Lachesis_group0__13_contigs__l.g7974  | 23.99132 | 83.39364 | -1.80175 | 0.000299 | 0.008877 | 2049 | - && Q9P6S5.1 RecName: Full=DASH complex subunit ask1; AltName: Full=Associated with spindles and kinetochores protein 1; AltName: Full=Meiotically up-regulated gene 181 protein; AltName: Full=Outer kinetochore protein ask1 && PF08655:DASH complex subunit Ask1                      |
| Lachesis_group0__13_contigs__l.g4773  | 253.8191 | 885.1544 | -1.80218 | 9.67E-05 | 0.004026 | 1614 | - && Q9ZWB3.1 RecName: Full=Casein kinase 1-like protein 9; AltName: Full=Dual specificity kinase 1; AltName: Full=Protein CASEIN KINASE I-LIKE 9; AltName: Full=Protein CASEIN KINASE I-LIKE 9 ALPHA; AltName: Full=Protein CASEIN KINASE I-LIKE 9 BETA && PF00069:Protein kinase domain |
| Lachesis_group0__13_contigs__l.g6809  | 676.3616 | 2372.455 | -1.81078 | 7.70E-06 | 0.000744 | 5298 | - && P15398.2 RecName: Full=DNA-directed RNA polymerase I subunit rpa1; AltName: Full=DNA-directed RNA polymerase I 190 kDa polypeptide; AltName: Full=DNA-directed RNA polymerase I largest subunit && PF04998:RNA polymerase Rpb1,                                                      |

|                                      |          |          |          |          |          |      |                                                                                                                                                                                                              |
|--------------------------------------|----------|----------|----------|----------|----------|------|--------------------------------------------------------------------------------------------------------------------------------------------------------------------------------------------------------------|
|                                      |          |          |          |          |          |      | domain 5 PF04983:RNA polymerase Rpb1, domain 3 PF04997:RNA polymerase Rpb1, domain 1 PF00623:RNA polymerase Rpb1, domain 2 PF05000:RNA polymerase Rpb1, domain 4                                             |
| Lachesis_group0__13_contigs__l.g6381 | 72.16364 | 253.2934 | -1.81085 | 0.000956 | 0.019774 | 1347 | - && Q75JQ3.1 RecName: Full=Peroxisome biogenesis factor 2; AltName: Full=Peroxin-2 && PF04757:Pex2 / Pex12 amino terminal region                                                                            |
| Lachesis_group0__13_contigs__l.g679  | 137.6861 | 483.0872 | -1.81152 | 9.63E-05 | 0.004026 | 2040 | - && - && PF08615:Ribonuclease H2 non-catalytic subunit (Ylr154p-like) PF08325:WLM domain PF00240:Ubiquitin family                                                                                           |
| Lachesis_group0__13_contigs__l.g5708 | 187.24   | 667.4837 | -1.83441 | 1.95E-06 | 0.000272 | 2418 | - && O14325.1 RecName: Full=Uncharacterized AAA domain-containing protein C16E9.10c && PF00004:ATPase family associated with various cellular activities (AAA)                                               |
| Lachesis_group0__13_contigs__l.g2013 | 66.86368 | 239.0437 | -1.83842 | 2.57E-05 | 0.001575 | 2442 | - && - && PF07814:Wings apart-like protein regulation of heterochromatin                                                                                                                                     |
| Lachesis_group0__13_contigs__l.g3885 | 720.0405 | 2575.634 | -1.83903 | 2.36E-05 | 0.001495 | 1755 | - && Q9UUE6.1 RecName: Full=Lysine--tRNA ligase, cytoplasmic; AltName: Full=Lysyl-tRNA synthetase; Short=LysRS && PF01336:OB-fold nucleic acid binding domain PF00152:tRNA synthetases class II (D, K and N) |
| Lachesis_group0__13_contigs__l.g676  | 38.63135 | 138.1435 | -1.83946 | 0.000122 | 0.004764 | 2580 | - && - && PF11559:Afadin- and alpha -actinin-Binding                                                                                                                                                         |
| Lachesis_group0__13_contigs__l.g6922 | 185.9637 | 666.9448 | -1.84316 | 2.28E-05 | 0.001473 | 2373 | - && A8P7F7.1 RecName: Full=Nucleolar protein 9; AltName: Full=Pumilio domain-containing protein NOP9 && -                                                                                                   |
| Lachesis_group0__13_contigs__l.g7204 | 407.8031 | 1463.593 | -1.84397 | 1.23E-05 | 0.000945 | 1422 | - && Q9UTK0.1 RecName: Full=20S-pre-rRNA D-site endonuclease nob1; AltName: Full=Pre-rRNA-                                                                                                                   |

|                                       |          |          |          |          |          |      |                                                                                                                                                                                               |
|---------------------------------------|----------|----------|----------|----------|----------|------|-----------------------------------------------------------------------------------------------------------------------------------------------------------------------------------------------|
|                                       |          |          |          |          |          |      | processing endonuclease nob1 && PF08772:Nin one binding (NOB1) Zn-ribbon like                                                                                                                 |
| Lachesis_group0__13_contigs__l.g10511 | 1474.98  | 5307.411 | -1.84745 | 3.45E-05 | 0.001923 | 1890 | - && P87142.3 RecName: Full=Heat shock protein 70 homolog C57A7.12 && PF00012:Hsp70 protein PF10712:NAD-specific glutamate dehydrogenase                                                      |
| Lachesis_group0__13_contigs__l.g10121 | 82.46335 | 297.3292 | -1.85064 | 0.002284 | 0.032866 | 1155 | - && - && PF00248:Aldo/keto reductase family                                                                                                                                                  |
| Lachesis_group0__13_contigs__l.g8058  | 571.2332 | 2064.914 | -1.85417 | 1.43E-06 | 0.000227 | 2850 | - && Q5U2W5.1 RecName: Full=Transducin beta-like protein 3 && PF08625:Utp13 specific WD40 associated domain                                                                                   |
| Lachesis_group0__13_contigs__l.g10960 | 354.5938 | 1286.927 | -1.85975 | 0.003794 | 0.044675 | 1830 | - && A1CFL2.1 RecName: Full=Dehydrogenase patE; AltName: Full=Patulin synthesis protein E; Flags: Precursor && PF00732:GMC oxidoreductase PF05199:GMC oxidoreductase                          |
| Lachesis_group0__13_contigs__l.g4540  | 66.80394 | 243.0921 | -1.86488 | 0.000263 | 0.008171 | 921  | - && Q6ME51.1 RecName: Full=50S ribosomal protein L5 && PF00673:ribosomal L5P family C-terminus                                                                                               |
| Lachesis_group0__13_contigs__l.g4764  | 461.0947 | 1680.487 | -1.86599 | 4.56E-06 | 0.000521 | 2367 | - && O74879.1 RecName: Full=Ribosome biogenesis protein enp2 homolog && PF08159:NUC153 domain                                                                                                 |
| Lachesis_group0__13_contigs__l.g5609  | 133.3965 | 487.5559 | -1.86962 | 7.88E-05 | 0.003444 | 2427 | - && A6QPL4.2 RecName: Full=Kinesin-like protein KIF22 && PF00225:Kinesin motor domain                                                                                                        |
| Lachesis_group0__13_contigs__l.g675   | 65.86448 | 241.9297 | -1.87982 | 0.000367 | 0.01003  | 1080 | - && O14242.2 RecName: Full=Putative pyridoxal kinase C6F6.11c && PF08543:Phosphomethylpyrimidine kinase                                                                                      |
| Lachesis_group0__13_contigs__l.g11653 | 235.2442 | 866.715  | -1.88198 | 1.33E-05 | 0.001003 | 3237 | - && Q99385.1 RecName: Full=Vacuolar calcium ion transporter; AltName: Full=High copy number undoes manganese protein 1; AltName: Full=Manganese resistance 1 protein; AltName: Full=Vacuolar |

|                                      |          |          |          |          |          |      |                                                                                                                                                                                                                                                                    |
|--------------------------------------|----------|----------|----------|----------|----------|------|--------------------------------------------------------------------------------------------------------------------------------------------------------------------------------------------------------------------------------------------------------------------|
|                                      |          |          |          |          |          |      | Ca(2+)/H(+) exchanger && PF02146:Sir2 family PF01699:Sodium/calcium exchanger protein                                                                                                                                                                              |
| Lachesis_group0__13_contigs__l.g6430 | 449.4433 | 1656.454 | -1.88201 | 2.22E-05 | 0.001445 | 2172 | - && O43000.2 RecName: Full=Pantothenate transporter liz1 && -                                                                                                                                                                                                     |
| Lachesis_group0__13_contigs__l.g7875 | 183.3484 | 679.9375 | -1.89067 | 3.28E-06 | 0.000408 | 1470 | - && Q8C2P3.1 RecName: Full=tRNA-dihydrouridine(16/17) synthase [NAD(P)(+)]-like; AltName: Full=tRNA-dihydrouridine synthase 1-like && PF01207:Dihydrouridine synthase (Dus)                                                                                       |
| Lachesis_group0__13_contigs__l.g8301 | 146.7932 | 544.5363 | -1.89196 | 0.0001   | 0.004133 | 1839 | - && O74468.1 RecName: Full=Probable uroporphyrinogen-III C-methyltransferase && PF14823:Sirohaem biosynthesis protein C-terminal PF13241:Putative NAD(P)-binding PF00590:Tetrapyrrole (Corrin/Porphyrin) Methylases PF14824:Sirohaem biosynthesis protein central |
| Lachesis_group0__13_contigs__l.g3366 | 148.4316 | 550.84   | -1.89245 | 2.71E-05 | 0.00162  | 963  | - && Q6BDR8.1 RecName: Full=Non-structural maintenance of chromosome element 4; Short=Non-SMC element 4; AltName: Full=DNA repair protein rad62 && PF08743:Nse4 C-terminal PF15412:Binding domain of Nse4/EID3 to Nse3-MAGE                                        |
| Lachesis_group0__13_contigs__l.g6517 | 151.9975 | 569.0504 | -1.90404 | 0.00025  | 0.007911 | 540  | - && Q6MVL2.1 RecName: Full=Deoxyuridine 5'-triphosphate nucleotidohydrolase; Short=dUTPase; AltName: Full=dUTP pyrophosphatase && PF00692:dUTPase                                                                                                                 |
| Lachesis_group0__13_contigs__l.g8723 | 23.71127 | 88.87668 | -1.90607 | 7.25E-05 | 0.003329 | 3117 | - && - && PF10193:Telomere length regulation protein                                                                                                                                                                                                               |
| Lachesis_group0__13_contigs__l.g3687 | 85.41165 | 320.0975 | -1.90748 | 6.98E-05 | 0.003238 | 372  | - && Q09723.1 RecName: Full=Multifunctional methyltransferase subunit trm112; AltName: Full=eRF1 methyltransferase subunit trm112; Short=eRF1 MTase                                                                                                                |



|                                       |          |          |          |          |          |      |                                                                                                                                                                                                                                 |
|---------------------------------------|----------|----------|----------|----------|----------|------|---------------------------------------------------------------------------------------------------------------------------------------------------------------------------------------------------------------------------------|
|                                       |          |          |          |          |          |      | subunit trm112; AltName: Full=tRNA methyltransferase 112 homolog && PF03966:Trm112p-like protein                                                                                                                                |
| Lachesis_group0__13_contigs__l.g623   | 866.0054 | 3263.618 | -1.91421 | 0.00029  | 0.008702 | 1839 | - && P84285.1 RecName: Full=Sterol O-acyltransferase 2; AltName: Full=ASAT; AltName: Full=Sterol-ester synthase && PF03062:MBOAT, membrane-bound O-acyltransferase family                                                       |
| Lachesis_group0__13_contigs__l.g11036 | 245.2475 | 924.6617 | -1.91478 | 0.000341 | 0.009657 | 1863 | - && - && PF10297:Minimal binding motif of Hap4 for binding to Hap2/3/5                                                                                                                                                         |
| Lachesis_group0__13_contigs__l.g11157 | 104.3607 | 393.3342 | -1.9154  | 2.35E-06 | 0.000319 | 1179 | - && Q8Z8W3.1 RecName: Full=2-dehydropantoate 2-reductase; AltName: Full=Ketopantoate reductase; Short=KPA reductase; Short=KPR && PF02558:Ketopantoate reductase PanE/ApbA PF08546:Ketopantoate reductase PanE/ApbA C terminal |
| Lachesis_group0__13_contigs__l.g7294  | 37.93235 | 143.4478 | -1.92245 | 0.000124 | 0.004784 | 4167 | - && - && PF12770:CHAT domain                                                                                                                                                                                                   |
| Lachesis_group0__13_contigs__l.g2706  | 34.09088 | 129.0153 | -1.9231  | 0.000172 | 0.006132 | 645  | - && - && PF16015:Promethin                                                                                                                                                                                                     |
| Lachesis_group0__13_contigs__l.g7942  | 20.29024 | 77.21297 | -1.92541 | 8.40E-05 | 0.003628 | 3114 | - && P97929.2 RecName: Full=Breast cancer type 2 susceptibility protein homolog; AltName: Full=Fanconi anemia group D1 protein homolog && PF09103:BRCA2, oligonucleotide/oligosaccharide-binding, domain 1                      |
| Lachesis_group0__13_contigs__l.g9064  | 193.8602 | 736.9571 | -1.92756 | 4.58E-05 | 0.002424 | 1929 | - && Q4P9E5.2 RecName: Full=ATP-dependent rRNA helicase SPB4 && PF00270:DEAD/DEAH box helicase PF00271:Helicase conserved C-terminal domain PF13959:Domain of unknown function (DUF4217)                                        |

|                                      |          |          |          |          |          |      |                                                                                                                                                                                             |
|--------------------------------------|----------|----------|----------|----------|----------|------|---------------------------------------------------------------------------------------------------------------------------------------------------------------------------------------------|
| Lachesis_group0__13_contigs__l.g9486 | 93.22755 | 356.7381 | -1.93696 | 4.98E-05 | 0.002538 | 1944 | - && O94481.2 RecName: Full=Transcription factor TFIIIB component B''; AltName: Full=Transcription factor TFIIIB complex subunit bdp1 && PF15963:Myb DNA-binding like                       |
| Lachesis_group0__13_contigs__l.g4546 | 561.3181 | 2160.843 | -1.94495 | 7.62E-07 | 0.000145 | 1956 | - && Q9UT32.1 RecName: Full=Putative ribosome biogenesis protein C8F11.04; AltName: Full=U3 snoRNP-associated protein C8F11.04 && PF00687:Ribosomal protein L1p/L10e family                 |
| Lachesis_group0__13_contigs__l.g5328 | 24.90464 | 96.24862 | -1.94779 | 0.001004 | 0.020393 | 2970 | - && Q10213.1 RecName: Full=ATP-dependent DNA helicase srs2 && PF13361:UvrD-like helicase C-terminal domain PF00580:UvrD/REP helicase N-terminal domain                                     |
| Lachesis_group0__13_contigs__l.g4900 | 263.1345 | 1022.159 | -1.9581  | 1.20E-06 | 0.0002   | 1722 | - && Q9P775.1 RecName: Full=Uncharacterized WD repeat-containing protein C17D11.16 && -                                                                                                     |
| Lachesis_group0__13_contigs__l.g2228 | 187.3415 | 728.0367 | -1.95881 | 2.72E-05 | 0.00162  | 1173 | - && Q01752.1 RecName: Full=Aryl-alcohol dehydrogenase [NADP(+)]; Short=AAD && PF00248:Aldo/keto reductase family                                                                           |
| Lachesis_group0__13_contigs__l.g4250 | 181.8332 | 713.0183 | -1.97139 | 6.75E-06 | 0.000687 | 1431 | - && O94636.2 RecName: Full=tRNA (guanine(10)-N2)-methyltransferase; AltName: Full=tRNA guanosine-2'-O-methyltransferase TRM11; Short=tRNA methylase 11 && PF13659:Methyltransferase domain |
| Lachesis_group0__13_contigs__l.g6510 | 313.9004 | 1231.082 | -1.97218 | 5.78E-06 | 0.00061  | 4026 | - && Q9Y767.2 RecName: Full=DNA polymerase gamma, mitochondrial; AltName: Full=Mitochondrial DNA polymerase catalytic subunit; Flags: Precursor && PF00476:DNA polymerase family A          |
| Lachesis_group0__13_contigs__l.g9214 | 661.9822 | 2599.091 | -1.97328 | 5.44E-05 | 0.002698 | 1455 | - && P38680.2 RecName: Full=N amino acid transport system protein; AltName: Full=Methyltryptophan                                                                                           |

|                                       |          |          |          |          |          |      |                                                                                                                                                                                                                                                                                        |
|---------------------------------------|----------|----------|----------|----------|----------|------|----------------------------------------------------------------------------------------------------------------------------------------------------------------------------------------------------------------------------------------------------------------------------------------|
|                                       |          |          |          |          |          |      | resistance protein && PF01490:Transmembrane amino acid transporter protein                                                                                                                                                                                                             |
| Lachesis_group0__13_contigs__l.g5291  | 177.7319 | 701.5235 | -1.9811  | 7.19E-06 | 0.000702 | 2406 | - && P78963.2 RecName: Full=Protein arginine N-methyltransferase skb1; AltName: Full=Shk1 kinase-binding protein 1; AltName: Full=Type II protein arginine N-methyltransferase; Short=Type II PRMT && PF05185:PRMT5 arginine-N-methyltransferase PF13857:Ankyrin repeats (many copies) |
| Lachesis_group0__13_contigs__l.g11370 | 55.45275 | 219.2845 | -1.98561 | 7.97E-05 | 0.003457 | 1788 | - && O74397.1 RecName: Full=Asparagine synthetase domain-containing protein C4F6.11c && PF00733:Asparagine synthase                                                                                                                                                                    |
| Lachesis_group0__13_contigs__l.g2733  | 592.0425 | 2348.143 | -1.98795 | 4.57E-05 | 0.002424 | 1989 | - && Q5AKA5.1 RecName: Full=Cys-Gly metallodipeptidase DUG1; AltName: Full=Deficient in utilization of glutathione protein 1; AltName: Full=GSH degradosomal complex subunit DUG1 && PF07687:Peptidase dimerisation domain PF01546:Peptidase family M20/M25/M40                        |
| Lachesis_group0__13_contigs__l.g8807  | 52.94206 | 210.7749 | -1.9925  | 0.000316 | 0.009132 | 2754 | - && - && PF12253:Chromatin assembly factor 1 subunit A                                                                                                                                                                                                                                |
| Lachesis_group0__13_contigs__l.g9612  | 17.40464 | 68.90354 | -1.99275 | 0.001286 | 0.023904 | 291  | - && - && PF05730:CFEM domain                                                                                                                                                                                                                                                          |
| Lachesis_group0__13_contigs__l.g148   | 104.3861 | 417.1962 | -1.9991  | 2.51E-05 | 0.001555 | 1245 | - && P49321.2 RecName: Full=Nuclear autoantigenic sperm protein; Short=NASP && PF10516:SHNi-TPR                                                                                                                                                                                        |
| Lachesis_group0__13_contigs__l.g9851  | 32.75786 | 131.4061 | -2.00576 | 0.000653 | 0.015071 | 1155 | - && Q14AI0.1 RecName: Full=Sister chromatid cohesion protein DCC1; AltName: Full=Defective in sister chromatid cohesion protein 1 homolog && PF09724:Uncharacterized conserved protein (DUF2036)                                                                                      |

|                                      |          |          |          |          |          |      |                                                                                                                                                                                                                                                                     |
|--------------------------------------|----------|----------|----------|----------|----------|------|---------------------------------------------------------------------------------------------------------------------------------------------------------------------------------------------------------------------------------------------------------------------|
| Lachesis_group0__13_contigs__l.g9329 | 55.67082 | 223.0857 | -2.00582 | 0.000152 | 0.00561  | 1620 | - && Q9UT75.1 RecName: Full=tRNA dimethylallyltransferase, mitochondrial; AltName: Full=Isopentenyl-diphosphate: tRNA isopentenyltransferase; Short=IPP transferase; Short=IPPT; AltName: Full=tRNA isopentenyltransferase; Short=IPTase && PF01715:IPP transferase |
| Lachesis_group0__13_contigs__l.g7387 | 13.01278 | 52.22069 | -2.00632 | 0.001409 | 0.025242 | 1059 | - && Q9P7F4.1 RecName: Full=Zinc-type alcohol dehydrogenase-like protein C2E1P3.01 && PF00107:Zinc-binding dehydrogenase                                                                                                                                            |
| Lachesis_group0__13_contigs__l.g2096 | 99.98075 | 402.4498 | -2.00896 | 4.57E-07 | 0.000113 | 3864 | - && - && PF00498:FHA domain                                                                                                                                                                                                                                        |
| Lachesis_group0__13_contigs__l.g5464 | 1776.883 | 7162.729 | -2.01119 | 1.09E-05 | 0.000909 | 873  | - && - && PF00652:Ricin-type beta-trefoil lectin domain                                                                                                                                                                                                             |
| Lachesis_group0__13_contigs__l.g2229 | 370.3375 | 1497.433 | -2.01596 | 2.68E-06 | 0.000354 | 1362 | - && Q7ZYQ6.1 RecName: Full=DDB1- and CUL4-associated factor 13; AltName: Full=WD repeat and SOF domain-containing protein 1 && PF04158:Sof1-like domain PF00400:WD domain, G-beta repeat                                                                           |
| Lachesis_group0__13_contigs__l.g5027 | 43.12328 | 175.4765 | -2.02588 | 0.000257 | 0.008015 | 1047 | - && - && PF05368:NmrA-like family                                                                                                                                                                                                                                  |
| Lachesis_group0__13_contigs__l.g5028 | 48.05657 | 197.0802 | -2.03874 | 1.50E-05 | 0.001108 | 540  | - && - && PF05368:NmrA-like family                                                                                                                                                                                                                                  |
| Lachesis_group0__13_contigs__l.g452  | 179.9737 | 746.2492 | -2.05196 | 1.20E-05 | 0.000944 | 2142 | - && Q9UT59.1 RecName: Full=Putative uncharacterized oxidoreductase C513.07 && PF01370:NAD dependent epimerase/dehydratase family                                                                                                                                   |
| Lachesis_group0__13_contigs__l.g983  | 182.7704 | 759.2098 | -2.05557 | 7.12E-06 | 0.000702 | 1497 | - && O13724.1 RecName: Full=Zinc finger protein zpr1 && PF03367:ZPR1 zinc-finger domain                                                                                                                                                                             |
| Lachesis_group0__13_contigs__l.g262  | 251.9857 | 1049.201 | -2.0583  | 9.39E-06 | 0.000842 | 978  | - && Q6C7A6.1 RecName: Full=Cytosolic Fe-S cluster assembly factor NBP35; AltName: Full=Nucleotide-binding protein 35 && PF10609:NUBPL iron-transfer P-loop NTPase                                                                                                  |

|                                       |          |          |          |          |          |      |                                                                                                                                                                                                                                               |
|---------------------------------------|----------|----------|----------|----------|----------|------|-----------------------------------------------------------------------------------------------------------------------------------------------------------------------------------------------------------------------------------------------|
| Lachesis_group0__13_contigs__l.g8965  | 326.7108 | 1364.147 | -2.06238 | 5.18E-07 | 0.000123 | 3585 | - && O60094.2 RecName: Full=DNA polymerase V; Short=POL V && PF04931:DNA polymerase phi                                                                                                                                                       |
| Lachesis_group0__13_contigs__l.g9128  | 70.01513 | 292.244  | -2.06267 | 0.000129 | 0.00492  | 1182 | - && Q601X8.2 RecName: Full=Chaperone protein DnaJ && PF00226:DnaJ domain                                                                                                                                                                     |
| Lachesis_group0__13_contigs__l.g2446  | 36.26179 | 151.7329 | -2.06731 | 2.14E-05 | 0.00141  | 1794 | - && Q9UUA2.1 RecName: Full=ATP-dependent DNA helicase pfh1; AltName: Full=DNA repair and recombination helicase pfh1; AltName: Full=PIF1 helicase homolog; AltName: Full=RRM3/PIF1 homolog 1; Flags: Precursor && PF05970:PIF1-like helicase |
| Lachesis_group0__13_contigs__l.g5290  | 808.6992 | 3401.382 | -2.07241 | 1.09E-06 | 0.000189 | 2961 | - && Q01371.2 RecName: Full=White collar 1 protein; Short=WC1 && PF00320:GATA zinc finger                                                                                                                                                     |
| Lachesis_group0__13_contigs__l.g6821  | 302.8906 | 1279.034 | -2.07832 | 1.01E-05 | 0.000882 | 3051 | - && Q5AT15.1 RecName: Full=Serine O-acetyltransferase; Flags: Precursor && PF00561:alpha/beta hydrolase fold                                                                                                                                 |
| Lachesis_group0__13_contigs__l.g5596  | 79.65616 | 338.0271 | -2.08666 | 4.71E-06 | 0.000532 | 1395 | - && O13632.1 RecName: Full=Tyrosine-protein phosphatase yvh1; Short=PTPase yvh1 && PF00782:Dual specificity phosphatase, catalytic domain                                                                                                    |
| Lachesis_group0__13_contigs__l.g136   | 2617.958 | 11153.69 | -2.091   | 0.001574 | 0.026446 | 1302 | - && - && PF12937:F-box-like                                                                                                                                                                                                                  |
| Lachesis_group0__13_contigs__l.g11437 | 132.9858 | 567.0575 | -2.09274 | 5.41E-06 | 0.000589 | 2559 | - && Q9W032.1 RecName: Full=Protein ecdysoneless && PF07093:SGT1 protein                                                                                                                                                                      |
| Lachesis_group0__13_contigs__l.g6400  | 59.94394 | 255.4221 | -2.09444 | 2.62E-05 | 0.001594 | 990  | - && P0CL97.1 RecName: Full=Pre-rRNA-processing protein ESF2; AltName: Full=18S rRNA factor 2 >P0CL96.1 RecName: Full=Pre-rRNA-processing protein ESF2; AltName: Full=18S rRNA factor 2 && -                                                  |
| Lachesis_group0__13_contigs__l.g2039  | 305.3677 | 1311.468 | -2.10261 | 0.001416 | 0.025314 | 810  | - && - && PF12697:Alpha/beta hydrolase family                                                                                                                                                                                                 |
| Lachesis_group0__13_contigs__l.g10180 | 39.66938 | 170.2908 | -2.10396 | 0.000338 | 0.009589 | 1005 | - && - && PF09468:Ydr279p protein family (RNase H2 complex component)                                                                                                                                                                         |

|                                       |          |          |          |          |          |       |                                                                                                                                                                                                                   |
|---------------------------------------|----------|----------|----------|----------|----------|-------|-------------------------------------------------------------------------------------------------------------------------------------------------------------------------------------------------------------------|
| Lachesis_group0__13_contigs__l.g4067  | 230.4895 | 995.7765 | -2.11178 | 1.58E-06 | 0.000239 | 2370  | - && O13956.1 RecName: Full=Ribosome biogenesis protein tsr1 && PF04950:40S ribosome biogenesis protein Tsr1 and BMS1 C-terminal PF08142:AARP2CN (NUC121) domain                                                  |
| Lachesis_group0__13_contigs__l.g6442  | 448.9675 | 1945.736 | -2.11585 | 3.31E-06 | 0.000408 | 1218  | - && Q9C167.2 RecName: Full=Ribonucleoside-diphosphate reductase small chain; AltName: Full=Ribonucleotide reductase small subunit && PF00268:Ribonucleotide reductase, small chain                               |
| Lachesis_group0__13_contigs__l.g9457  | 398.5915 | 1739.448 | -2.1257  | 1.36E-05 | 0.001016 | 3606  | - && - && PF03177:Non-repetitive/WGA-negative nucleoporin C-terminal PF08801:Nup133 N terminal like                                                                                                               |
| Lachesis_group0__13_contigs__l.g6389  | 111.715  | 489.496  | -2.13174 | 6.33E-05 | 0.003042 | 3042  | - && Q8K2V6.1 RecName: Full=Importin-11; Short=Imp11; AltName: Full=Ran-binding protein 11; Short=RanBP11 && -                                                                                                    |
| Lachesis_group0__13_contigs__l.g135   | 38.70529 | 170.7933 | -2.14262 | 1.07E-05 | 0.000909 | 1794  | - && - && PF00270:DEAD/DEAH box helicase                                                                                                                                                                          |
| novel.1277                            | 129.0368 | 574.8531 | -2.15448 | 0.001534 | 0.026182 | 17215 | - && P03875.2 RecName: Full=Putative COX1/OXI3 intron 1 protein && PF00961:LAGLIDADG endonuclease PF01348:Type II intron maturase                                                                                 |
| Lachesis_group0__13_contigs__l.g11644 | 44.47048 | 197.6362 | -2.15482 | 0.000125 | 0.004784 | 1089  | - && O94449.1 RecName: Full=Replication factor C subunit 4; Short=Replication factor C4 && PF00004:ATPase family associated with various cellular activities (AAA) PF08542:Replication factor C C-terminal domain |
| Lachesis_group0__13_contigs__l.g4744  | 44.99922 | 200.8213 | -2.1589  | 0.000121 | 0.00475  | 2280  | - && Q9BY08.1 RecName: Full=Emopamil-binding protein-like; AltName: Full=Emopamil-binding-related protein && PF05241:Emopamil binding protein                                                                     |
| Lachesis_group0__13_contigs__l.g6385  | 32.03796 | 143.0045 | -2.1597  | 0.000513 | 0.012604 | 1836  | - && - && PF09507:DNA polymerase subunit Cdc27                                                                                                                                                                    |

|                                      |          |          |          |          |          |      |                                                                                                                                                                                                                                                                                                                           |
|--------------------------------------|----------|----------|----------|----------|----------|------|---------------------------------------------------------------------------------------------------------------------------------------------------------------------------------------------------------------------------------------------------------------------------------------------------------------------------|
| Lachesis_group0__13_contigs__l.g6980 | 302.6942 | 1353.31  | -2.16058 | 1.62E-08 | 1.17E-05 | 1572 | - && Q0CJ61.1 RecName: Full=Efflux pump atB; AltName: Full=Terreic acid biosynthesis cluster protein B && PF07690:Major Facilitator Superfamily                                                                                                                                                                           |
| Lachesis_group0__13_contigs__l.g6693 | 154.9458 | 693.5653 | -2.16309 | 5.50E-07 | 0.000126 | 3240 | - && O74429.1 RecName: Full=Inositol hexakisphosphate and diphosphoinositol-pentakisphosphate kinase; AltName: Full=Cortical actin cytoskeleton protein asp1; AltName: Full=InsP6 and PP-IP5 kinase && PF00328:Histidine phosphatase superfamily (branch 2)                                                               |
| Lachesis_group0__13_contigs__l.g5321 | 695.1523 | 3164.859 | -2.18677 | 1.08E-05 | 0.000909 | 651  | - && P42769.1 RecName: Full=Glutathione S-transferase PM239X14; AltName: Full=GST class-phi && PF02798:Glutathione S-transferase, N-terminal domain PF00043:Glutathione S-transferase, C-terminal domain                                                                                                                  |
| Lachesis_group0__13_contigs__l.g3156 | 24.68658 | 112.1773 | -2.18743 | 3.86E-06 | 0.000457 | 1335 | - && Q6NU95.1 RecName: Full=RNA polymerase II-associated protein 3 && PF13414:TPR repeat                                                                                                                                                                                                                                  |
| Lachesis_group0__13_contigs__l.g8861 | 281.0396 | 1281.95  | -2.18974 | 2.39E-06 | 0.00032  | 1833 | - && Q92372.1 RecName: Full=Replication factor A protein 1; AltName: Full=Single-stranded DNA-binding protein p68 subunit && PF01336:OB-fold nucleic acid binding domain PF04057:Replication factor-A protein 1, N-terminal domain PF08646:Replication factor-A C terminal domain PF16900:Replication protein A OB domain |
| Lachesis_group0__13_contigs__l.g1337 | 71.99487 | 328.4986 | -2.19017 | 0.00024  | 0.007703 | 855  | - && O74628.1 RecName: Full=Uncharacterized oxidoreductase C162.03 && PF00106:short chain dehydrogenase                                                                                                                                                                                                                   |
| Lachesis_group0__13_contigs__l.g5207 | 48.13498 | 221.6625 | -2.20239 | 0.000198 | 0.006685 | 954  | - && Q5U209.1 RecName: Full=Ribonuclease H2 subunit A; Short=RNase H2 subunit A; AltName:                                                                                                                                                                                                                                 |

|                                      |          |          |          |          |          |      |                                                                                                                                                                                                                                                                                                                                               |
|--------------------------------------|----------|----------|----------|----------|----------|------|-----------------------------------------------------------------------------------------------------------------------------------------------------------------------------------------------------------------------------------------------------------------------------------------------------------------------------------------------|
|                                      |          |          |          |          |          |      | Full=Ribonuclease HI large subunit; Short=RNase HI large subunit; AltName: Full=Ribonuclease HI subunit A && PF01351:Ribonuclease HII                                                                                                                                                                                                         |
| Lachesis_group0__13_contigs__l.g470  | 1487.449 | 6892.205 | -2.21211 | 0.000185 | 0.006463 | 1044 | - && Q9UT59.1 RecName: Full=Putative uncharacterized oxidoreductase C513.07 && PF01370:NAD dependent epimerase/dehydratase family                                                                                                                                                                                                             |
| Lachesis_group0__13_contigs__l.g7689 | 48.12602 | 223.7386 | -2.2197  | 9.01E-06 | 0.00082  | 954  | - && O94480.1 RecName: Full=25S rRNA (uridine-N(3))-methyltransferase && PF10354:Domain of unknown function (DUF2431)                                                                                                                                                                                                                         |
| Lachesis_group0__13_contigs__l.g8566 | 69.34078 | 325.9575 | -2.23314 | 5.31E-06 | 0.000586 | 1047 | - && - && PF07574:Nse1 non-SMC component of SMC5-6 complex PF08746:RING-like domain                                                                                                                                                                                                                                                           |
| Lachesis_group0__13_contigs__l.g6690 | 123.1827 | 580.2773 | -2.23471 | 3.65E-08 | 1.71E-05 | 1764 | - && P94547.1 RecName: Full=Long-chain-fatty-acid--CoA ligase; AltName: Full=Long-chain acyl-CoA synthetase && PF13193:AMP-binding enzyme C-terminal domain PF00501:AMP-binding enzyme                                                                                                                                                        |
| Lachesis_group0__13_contigs__l.g9498 | 61.908   | 292.0583 | -2.23648 | 5.71E-07 | 0.000127 | 2595 | - && Q0CAF5.1 RecName: Full=Probable beta-glucosidase I; AltName: Full=Beta-D-glucoside glucohydrolase I; AltName: Full=Cellobiase I; AltName: Full=Gentiobiase I && PF01915:Glycosyl hydrolase family 3 C-terminal domain PF14310:Fibronectin type III-like domain PF07691:PA14 domain PF00933:Glycosyl hydrolase family 3 N terminal domain |
| Lachesis_group0__13_contigs__l.g1572 | 156.2146 | 738.4438 | -2.242   | 3.34E-08 | 1.65E-05 | 1032 | - && Q9Y6F1.3 RecName: Full=Poly [ADP-ribose] polymerase 3; Short=PARP-3; Short=hPARP-3; AltName: Full=ADP-ribosyltransferase diphtheria toxin-like 3; Short=ARTD3; AltName: Full=IRT1;                                                                                                                                                       |



|                                       |          |          |          |          |          |      |                                                                                                                                                                                           |
|---------------------------------------|----------|----------|----------|----------|----------|------|-------------------------------------------------------------------------------------------------------------------------------------------------------------------------------------------|
|                                       |          |          |          |          |          |      | AltName: Full=NAD(+) ADP-ribosyltransferase 3;<br>Short=ADPRT-3; AltName: Full=Poly[ADP-ribose]<br>synthase 3; Short=pADPRT-3 && PF00644:Poly(ADP-<br>ribose) polymerase catalytic domain |
| Lachesis_group0__13_contigs__l.g6805  | 29.96637 | 142.9605 | -2.25948 | 9.81E-05 | 0.004066 | 906  | - && - && PF08167:rRNA processing/ribosome<br>biogenesis                                                                                                                                  |
| Lachesis_group0__13_contigs__l.g6392  | 165.8049 | 797.1579 | -2.26527 | 0.000422 | 0.011039 | 1167 | - && O13991.3 RecName: Full=Uncharacterized<br>oxidoreductase C26H5.09c &&<br>PF01408:Oxidoreductase family, NAD-binding<br>Rossmann fold                                                 |
| Lachesis_group0__13_contigs__l.g5558  | 252.1217 | 1220.835 | -2.27608 | 3.65E-07 | 9.77E-05 | 2619 | - && Q9C1X1.1 RecName: Full=Periodic tryptophan<br>protein 2 homolog && PF00400:WD domain, G-beta<br>repeat PF04003:Dip2/Utp12 Family                                                     |
| Lachesis_group0__13_contigs__l.g10926 | 22.30134 | 108.968  | -2.29463 | 4.95E-05 | 0.002538 | 1524 | - && P36146.1 RecName: Full=Protein LAS1 &&<br>PF04031:Las1-like                                                                                                                          |
| Lachesis_group0__13_contigs__l.g4760  | 55.73506 | 277.4413 | -2.31456 | 0.001676 | 0.027257 | 903  | - && O74628.1 RecName: Full=Uncharacterized<br>oxidoreductase C162.03 && PF00106:short chain<br>dehydrogenase                                                                             |
| Lachesis_group0__13_contigs__l.g4468  | 214.09   | 1087.556 | -2.34531 | 7.33E-07 | 0.000143 | 1083 | - && O13648.3 RecName: Full=Ribosomal protein<br>arginine N-methyltransferase rmt3 &&<br>PF06325:Ribosomal protein L11 methyltransferase<br>(PrmA)                                        |
| Lachesis_group0__13_contigs__l.g3663  | 81.75315 | 415.3968 | -2.34579 | 1.24E-05 | 0.000945 | 831  | - && D4AK18.2 RecName: Full=Uncharacterized<br>secreted protein ARB_06907; Flags: Precursor && -                                                                                          |
| Lachesis_group0__13_contigs__l.g5251  | 37.10791 | 189.6808 | -2.35291 | 0.000158 | 0.005761 | 1077 | - && Q8X082.1 RecName: Full=Replication factor C<br>subunit 5; Short=Replication factor C5; AltName:<br>Full=Probable activator 1 subunit 5 &&                                            |

|                                       |          |          |          |          |          |      |                                                                                                                                                                          |
|---------------------------------------|----------|----------|----------|----------|----------|------|--------------------------------------------------------------------------------------------------------------------------------------------------------------------------|
|                                       |          |          |          |          |          |      | PF08542:Replication factor C C-terminal domain PF13177:DNA polymerase III, delta subunit                                                                                 |
| Lachesis_group0__13_contigs__l.g2881  | 22.55151 | 116.3042 | -2.3716  | 2.86E-06 | 0.000373 | 1287 | - && P40481.1 RecName: Full=Histidine protein methyltransferase 1; AltName: Full=Mitotic exit network interactor 1 && -                                                  |
| Lachesis_group0__13_contigs__l.g5709  | 26.89931 | 144.57   | -2.42454 | 1.78E-05 | 0.001247 | 2832 | - && - && PF00533:BRCA1 C Terminus (BRCT) domain PF12738:twin BRCT domain                                                                                                |
| Lachesis_group0__13_contigs__l.g3189  | 46.64588 | 251.9903 | -2.43634 | 8.69E-07 | 0.000156 | 1437 | - && B5FXE5.1 RecName: Full=Apoptosis-inducing factor 2 && PF07992:Pyridine nucleotide-disulphide oxidoreductase                                                         |
| Lachesis_group0__13_contigs__l.g4640  | 114.1742 | 629.8872 | -2.46535 | 7.74E-07 | 0.000145 | 1881 | - && - && PF12937:F-box-like                                                                                                                                             |
| Lachesis_group0__13_contigs__l.g10399 | 16.08956 | 89.41688 | -2.47658 | 0.001628 | 0.026843 | 1371 | - && Q06816.2 RecName: Full=Putative epoxide hydrolase; AltName: Full=Epoxide hydratase; Flags: Precursor && PF06441:Epoxide hydrolase N terminus                        |
| Lachesis_group0__13_contigs__l.g4098  | 607.0298 | 3450.466 | -2.50692 | 2.34E-05 | 0.001488 | 1161 | - && Q7SDV9.1 RecName: Full=Cytochrome c peroxidase, mitochondrial; Short=CCP; Flags: Precursor && PF00141:Peroxidase                                                    |
| Lachesis_group0__13_contigs__l.g201   | 189.1413 | 1120.864 | -2.56693 | 1.59E-05 | 0.001136 | 1947 | - && - && PF08618:Transcription factor Opi1                                                                                                                              |
| Lachesis_group0__13_contigs__l.g5623  | 254.2291 | 1528.701 | -2.58803 | 1.11E-05 | 0.000919 | 3048 | - && Q01371.2 RecName: Full=White collar 1 protein; Short=WC1 && PF08447:PAS fold PF13426:PAS domain                                                                     |
| Lachesis_group0__13_contigs__l.g1463  | 48.77124 | 293.6813 | -2.59116 | 2.47E-08 | 1.45E-05 | 2145 | - && O94564.1 RecName: Full=Zinc-type alcohol dehydrogenase-like protein C1773.06c && PF00107:Zinc-binding dehydrogenase PF08240:Alcohol dehydrogenase GroES-like domain |

|                                       |          |          |          |          |          |      |                                                                                                                                                                                                                                                                                                                    |
|---------------------------------------|----------|----------|----------|----------|----------|------|--------------------------------------------------------------------------------------------------------------------------------------------------------------------------------------------------------------------------------------------------------------------------------------------------------------------|
| Lachesis_group0__13_contigs__l.g4398  | 77.08646 | 466.3308 | -2.59732 | 2.86E-08 | 1.49E-05 | 1752 | - && D7PHY8.1 RecName: Full=Efflux pump vrtL; AltName: Full=Viridicatumtoxin synthesis protein L && PF07690:Major Facilitator Superfamily                                                                                                                                                                          |
| Lachesis_group0__13_contigs__l.g5348  | 72.70581 | 441.4284 | -2.60217 | 4.85E-08 | 1.89E-05 | 3462 | - && Q06680.2 RecName: Full=Condensin complex subunit 3; AltName: Full=CAPG homolog && PF13646:HEAT repeats PF12719:Nuclear condensing complex subunits, C-term domain                                                                                                                                             |
| Lachesis_group0__13_contigs__l.g1944  | 548.5339 | 3339.488 | -2.60594 | 6.93E-07 | 0.000138 | 1350 | - && Q55DV9.1 RecName: Full=Cystathionine gamma-lyase; AltName: Full=Gamma-cystathionase && PF01053:Cys/Met metabolism PLP-dependent enzyme                                                                                                                                                                        |
| Lachesis_group0__13_contigs__l.g1338  | 67.46262 | 411.928  | -2.61026 | 2.03E-05 | 0.001366 | 855  | - && O74628.1 RecName: Full=Uncharacterized oxidoreductase C162.03 && PF00106:short chain dehydrogenase                                                                                                                                                                                                            |
| Lachesis_group0__13_contigs__l.g4765  | 164.3636 | 1005.293 | -2.61333 | 8.47E-06 | 0.000778 | 1059 | - && Q8K2T1.1 RecName: Full=NmrA-like family domain-containing protein 1 && PF05368:NmrA-like family                                                                                                                                                                                                               |
| Lachesis_group0__13_contigs__l.g10188 | 38.06753 | 240.5988 | -2.65932 | 5.88E-08 | 2.12E-05 | 1290 | - && Q5BK68.1 RecName: Full=snRNA-activating protein complex subunit 3; Short=SNAPc subunit 3; AltName: Full=Small nuclear RNA-activating complex polypeptide 3 && PF12251:snRNA-activating protein of 50kDa MW C terminal                                                                                         |
| Lachesis_group0__13_contigs__l.g9938  | 1463.005 | 9261.775 | -2.66231 | 9.21E-10 | 1.13E-06 | 3204 | - && Q9Y8G7.1 RecName: Full=Bifunctional cytochrome P450/NADPH--P450 reductase; AltName: Full=Cytochrome P450foxy; AltName: Full=Fatty acid omega-hydroxylase; AltName: Full=P450foxy; Includes: RecName: Full=Cytochrome P450 505; Includes: RecName: Full=NADPH--cytochrome P450 reductase && PF00067:Cytochrome |

|                                       |          |          |          |          |          |      |                                                                                                                                                                 |
|---------------------------------------|----------|----------|----------|----------|----------|------|-----------------------------------------------------------------------------------------------------------------------------------------------------------------|
|                                       |          |          |          |          |          |      | P450 PF00258:Flavodoxin PF00667:FAD binding domain PF00175:Oxidoreductase NAD-binding domain                                                                    |
| Lachesis_group0__13_contigs__l.g6847  | 321.2773 | 2094.006 | -2.7043  | 9.76E-06 | 0.000863 | 771  | - && Q12335.1 RecName: Full=Protoplast secreted protein 2; Flags: Precursor && PF03358:NADPH-dependent FMN reductase                                            |
| Lachesis_group0__13_contigs__l.g10956 | 40.89337 | 269.4765 | -2.71881 | 4.02E-08 | 1.73E-05 | 1035 | - && - && PF06775:Putative adipose-regulatory protein (Seipin)                                                                                                  |
| Lachesis_group0__13_contigs__l.g359   | 18.33066 | 120.4386 | -2.72514 | 3.14E-06 | 0.000398 | 960  | - && O59952.1 RecName: Full=Lipase; AltName: Full=Triacylglycerol lipase; Flags: Precursor && PF01764:Lipase (class 3)                                          |
| Lachesis_group0__13_contigs__l.g6519  | 9339.331 | 63585.87 | -2.76731 | 5.44E-08 | 2.04E-05 | 1803 | - && Q09653.3 RecName: Full=Putative cytochrome P450 CYP13A10 && PF00067:Cytochrome P450                                                                        |
| Lachesis_group0__13_contigs__l.g1020  | 12.73573 | 87.45131 | -2.78412 | 1.53E-05 | 0.001111 | 924  | - && Q9UT28.1 RecName: Full=Protein N-methyltransferase nnt1; AltName: Full=Nicotinamide N-methyltransferase-like protein 1 && PF10294:Lysine methyltransferase |
| Lachesis_group0__13_contigs__l.g1968  | 824.4631 | 6036.214 | -2.87218 | 9.90E-08 | 3.44E-05 | 1593 | - && G3Y416.1 RecName: Full=Cytochrome P450 monooxygenase yanC; AltName: Full=Yanuthone D synthesis protein C; Flags: Precursor && PF00067:Cytochrome P450      |
| Lachesis_group0__13_contigs__l.g1398  | 288.0803 | 2152.149 | -2.90121 | 1.45E-08 | 1.13E-05 | 1689 | - && S0EEY7.1 RecName: Full=Efflux pump FUS6; AltName: Full=Fusarin biosynthesis protein 6 && PF07690:Major Facilitator Superfamily                             |
| Lachesis_group0__13_contigs__l.g5326  | 128.2616 | 998.0624 | -2.95981 | 2.57E-09 | 2.41E-06 | 1788 | - && Q870L3.1 RecName: Full=Siderophore iron transporter mirC; AltName: Full=Major facilitator iron-regulated transporter C && -                                |

|                                       |          |          |          |          |          |      |                                                                                                                                                                                                                                                                                                                                                                                                                                                                                                                                                                                                                                                                                                                                                                                                                                               |
|---------------------------------------|----------|----------|----------|----------|----------|------|-----------------------------------------------------------------------------------------------------------------------------------------------------------------------------------------------------------------------------------------------------------------------------------------------------------------------------------------------------------------------------------------------------------------------------------------------------------------------------------------------------------------------------------------------------------------------------------------------------------------------------------------------------------------------------------------------------------------------------------------------------------------------------------------------------------------------------------------------|
| Lachesis_group0__13_contigs__l.g5502  | 31.84006 | 252.309  | -2.99116 | 2.70E-08 | 1.49E-05 | 1629 | - && Q09887.1 RecName: Full=Uncharacterized amino-acid permease C584.13 && PF13520:Amino acid permease                                                                                                                                                                                                                                                                                                                                                                                                                                                                                                                                                                                                                                                                                                                                        |
| Lachesis_group0__13_contigs__l.g1462  | 210.5674 | 1881.944 | -3.15973 | 7.44E-09 | 6.34E-06 | 1110 | - && O94564.1 RecName: Full=Zinc-type alcohol dehydrogenase-like protein C1773.06c && PF00107:Zinc-binding dehydrogenase                                                                                                                                                                                                                                                                                                                                                                                                                                                                                                                                                                                                                                                                                                                      |
| Lachesis_group0__13_contigs__l.g10724 | 379.8038 | 3521.268 | -3.21282 | 1.81E-07 | 5.48E-05 | 1872 | - && P11182.3 RecName: Full=Lipoamide acyltransferase component of branched-chain alpha-keto acid dehydrogenase complex, mitochondrial; AltName: Full=52 kDa mitochondrial autoantigen of primary biliary cirrhosis; AltName: Full=Branched chain 2-oxo-acid dehydrogenase complex component E2; Short=BCOADC-E2; AltName: Full=Branched-chain alpha-keto acid dehydrogenase complex component E2; Short=BCKAD-E2; Short=BCKADE2; AltName: Full=Dihydrolipoamide acetyltransferase component of branched-chain alpha-keto acid dehydrogenase complex; AltName: Full=Dihydrolipoamide branched chain transacylase; AltName: Full=Dihydrolipoyllysine-residue (2-methylpropanoyl)transferase; Flags: Precursor && PF00364:Biotin-requiring enzyme PF00198:2-oxoacid dehydrogenases acyltransferase (catalytic domain) PF02817:e3 binding domain |
| Lachesis_group0__13_contigs__l.g344   | 179.7168 | 1670.468 | -3.21732 | 1.03E-09 | 1.13E-06 | 1665 | - && P53388.1 RecName: Full=Dicarboxylic amino acid permease && PF00324:Amino acid permease                                                                                                                                                                                                                                                                                                                                                                                                                                                                                                                                                                                                                                                                                                                                                   |
| Lachesis_group0__13_contigs__l.g7108  | 19.00725 | 179.0706 | -3.23712 | 1.17E-06 | 0.000199 | 1278 | - && P41816.2 RecName: Full=NADPH dehydrogenase 3; AltName: Full=Old yellow enzyme 3 &&                                                                                                                                                                                                                                                                                                                                                                                                                                                                                                                                                                                                                                                                                                                                                       |

|                                       |          |          |          |          |          |      |                                                                                                                                                                         |
|---------------------------------------|----------|----------|----------|----------|----------|------|-------------------------------------------------------------------------------------------------------------------------------------------------------------------------|
|                                       |          |          |          |          |          |      | PF00724:NADH:flavin oxidoreductase / NADH oxidase family                                                                                                                |
| Lachesis_group0__13_contigs__l.g10002 | 35.99294 | 345.5829 | -3.26772 | 3.95E-07 | 0.0001   | 1059 | - && A8DRH7.1 RecName: Full=L-threo-3-deoxy-hexylosonate aldolase; AltName: Full=L-threo-3-deoxy-hexulosonate aldolase && PF00701:Dihydrodipicolinate synthetase family |
| Lachesis_group0__13_contigs__l.g9890  | 46.26875 | 479.7935 | -3.3739  | 1.60E-11 | 5.00E-08 | 1824 | - && Q9C0V0.1 RecName: Full=Probable amino-acid permease PB1C11.02 && PF00324:Amino acid permease                                                                       |
| Lachesis_group0__13_contigs__l.g9594  | 49.10656 | 825.2781 | -4.07103 | 2.16E-08 | 1.44E-05 | 1008 | - && Q5XGR8.1 RecName: Full=Endoribonuclease LACTB2; AltName: Full=Beta-lactamase-like protein 2 && PF00753:Metallo-beta-lactamase superfamily                          |

**Log2Fold change:** values of transcripts upregulated in BaP and Brij 30 addition is represented by positive numbers and downregulated is represented by negative numbers.

Padj: adjust *P*-value

**Table S4** Expression of genes in the Brij30\_BaP and NoBaP comparisons

| gene_id                              | Brij30_BaP | NoBaP    | log <sub>2</sub> FoldChange | Pvalue   | padj     | gene_length | gene_description                                                                                                                                                                                                                                                                                    |
|--------------------------------------|------------|----------|-----------------------------|----------|----------|-------------|-----------------------------------------------------------------------------------------------------------------------------------------------------------------------------------------------------------------------------------------------------------------------------------------------------|
| Lachesis_group0__13_contigs__l.g8359 | 1726.933   | 24.88162 | 6.122587                    | 2.09E-28 | 7.30E-25 | 789         | - && Q91XV4.1 RecName: Full=L-xylulose reductase; Short=XR; AltName: Full=Dicarbonyl/L-xylulose reductase; AltName: Full=Sperm antigen P26h && PF00106:short chain dehydrogenase                                                                                                                    |
| Lachesis_group0__13_contigs__l.g8360 | 432.3769   | 10.37399 | 5.365414                    | 4.76E-17 | 4.13E-14 | 699         | - && Q6NUE2.1 RecName: Full=Carbonyl reductase family member 4; AltName: Full=3-ketoacyl-[acyl-carrier-protein] reductase beta subunit; Short=KAR beta subunit; AltName: Full=3-oxoacyl-[acyl-carrier-protein] reductase; AltName: Full=Quinone reductase CBR4 && PF00106:short chain dehydrogenase |
| Lachesis_group0__13_contigs__l.g2225 | 3278.043   | 80.51738 | 5.344839                    | 3.78E-17 | 3.59E-14 | 1257        | - && Q01752.1 RecName: Full=Aryl-alcohol dehydrogenase [NADP(+)]; Short=AAD && PF00248:Aldo/keto reductase family                                                                                                                                                                                   |
| Lachesis_group0__13_contigs__l.g7729 | 1622.787   | 61.01763 | 4.730985                    | 5.76E-21 | 1.00E-17 | 1071        | - && G3XMC6.1 RecName: Full=Dehydrogenase azaJ; AltName: Full=Azaphilone biosynthesis cluster protein azaJ && PF08240:Alcohol dehydrogenase GroES-like domain PF00107:Zinc-binding dehydrogenase                                                                                                    |
| Lachesis_group0__13_contigs__l.g2647 | 1495.671   | 79.94657 | 4.223604                    | 1.69E-11 | 6.08E-09 | 1212        | - && Q01752.1 RecName: Full=Aryl-alcohol dehydrogenase [NADP(+)]; Short=AAD && PF00248:Aldo/keto reductase family                                                                                                                                                                                   |

|                                      |          |          |          |          |          |      |                                                                                                                                                                                                              |
|--------------------------------------|----------|----------|----------|----------|----------|------|--------------------------------------------------------------------------------------------------------------------------------------------------------------------------------------------------------------|
| Lachesis_group0__13_contigs__l.g9363 | 36.06895 | 2.014527 | 4.108947 | 2.52E-05 | 0.000916 | 1479 | - && O69763.1 RecName: Full=Vanillin dehydrogenase && PF00171:Aldehyde dehydrogenase family                                                                                                                  |
| Lachesis_group0__13_contigs__l.g8361 | 50.19522 | 3.463245 | 3.835509 | 4.54E-05 | 0.001421 | 1023 | - && - && PF01040:UbiA prenyltransferase family                                                                                                                                                              |
| Lachesis_group0__13_contigs__l.g3707 | 2729.876 | 207.452  | 3.717506 | 6.94E-06 | 0.00033  | 1305 | - && Q70LM3.1 RecName: Full=Manganese peroxidase 2; Short=MnP2; AltName: Full=Manganese peroxidase isozyme 2; Flags: Precursor && PF00141:Peroxidase PF11895:Domain of unknown function (DUF3415)            |
| Lachesis_group0__13_contigs__l.g3514 | 3311.474 | 266.9033 | 3.633228 | 2.13E-09 | 4.27E-07 | 1473 | - && Q6UEF1.1 RecName: Full=Oxidoreductase Afly; AltName: Full=Aflatoxin biosynthesis protein Y && PF14027:Protein of unknown function (DUF4243)                                                             |
| Lachesis_group0__13_contigs__l.g794  | 4455.696 | 445.4461 | 3.322953 | 2.70E-07 | 2.45E-05 | 1977 | - && - && PF00004:ATPase family associated with various cellular activities (AAA)                                                                                                                            |
| Lachesis_group0__13_contigs__l.g6791 | 4529.458 | 490.1738 | 3.207721 | 1.54E-06 | 9.67E-05 | 513  | - && Q9JIM4.1 RecName: Full=Dual specificity protein phosphatase 12; AltName: Full=Glucokinase-associated dual specificity phosphatase; Short=GKAP && PF00782:Dual specificity phosphatase, catalytic domain |
| Lachesis_group0__13_contigs__l.g4699 | 20349.98 | 2217.834 | 3.197853 | 1.80E-10 | 4.59E-08 | 1041 | - && - && PF00702:haloacid dehalogenase-like hydrolase                                                                                                                                                       |
| Lachesis_group0__13_contigs__l.g4508 | 205.8208 | 23.09061 | 3.166602 | 1.96E-06 | 0.00012  | 903  | - && - && PF05368:NmrA-like family                                                                                                                                                                           |
| Lachesis_group0__13_contigs__l.g8358 | 974.4781 | 116.7031 | 3.058828 | 2.79E-09 | 5.34E-07 | 1050 | - && Q91XV4.1 RecName: Full=L-xylulose reductase; Short=XR; AltName: Full=Dicarbonyl/L-                                                                                                                      |



|                                      |          |          |          |          |          |      |                                                                                                                                                                                                                                                                                                                                                                   |
|--------------------------------------|----------|----------|----------|----------|----------|------|-------------------------------------------------------------------------------------------------------------------------------------------------------------------------------------------------------------------------------------------------------------------------------------------------------------------------------------------------------------------|
|                                      |          |          |          |          |          |      | xylulose reductase; AltName: Full=Sperm antigen P26h && PF00106:short chain dehydrogenase                                                                                                                                                                                                                                                                         |
| Lachesis_group0__13_contigs__l.g768  | 12812.97 | 1633.442 | 2.971768 | 8.42E-06 | 0.000381 | 1986 | - && - && PF00004:ATPase family associated with various cellular activities (AAA)                                                                                                                                                                                                                                                                                 |
| Lachesis_group0__13_contigs__l.g4840 | 2015.461 | 262.4409 | 2.941662 | 2.94E-11 | 9.92E-09 | 1068 | - && Q8FKG1.1 RecName: Full=S-(hydroxymethyl)glutathione dehydrogenase; AltName: Full=Alcohol dehydrogenase class-3; AltName: Full=Alcohol dehydrogenase class-III; AltName: Full=Glutathione-dependent formaldehyde dehydrogenase; Short=FALDH; Short=FDH; Short=GSH-FDH && PF00107:Zinc-binding dehydrogenase   PF08240:Alcohol dehydrogenase GroES-like domain |
| Lachesis_group0__13_contigs__l.g535  | 1260.453 | 168.7143 | 2.900208 | 3.86E-08 | 5.11E-06 | 1350 | - && P23262.4 RecName: Full=Salicylate hydroxylase; AltName: Full=Salicylate 1-monooxygenase && PF01494:FAD binding domain                                                                                                                                                                                                                                        |
| Lachesis_group0__13_contigs__l.g4839 | 861.4914 | 115.7918 | 2.895459 | 9.38E-08 | 1.04E-05 | 1125 | - && Q2HEW4.1 RecName: Full=Enoyl reductase CHGG_01240; AltName: Full=Chaetoglobosin biosynthesis protein CHGG_01240 && PF08240:Alcohol dehydrogenase GroES-like domain   PF00107:Zinc-binding dehydrogenase                                                                                                                                                      |
| Lachesis_group0__13_contigs__l.g4741 | 116.7205 | 16.27497 | 2.837363 | 1.18E-07 | 1.28E-05 | 1152 | - && - && PF00326:Prolyl oligopeptidase family   PF07859:alpha/beta hydrolase fold                                                                                                                                                                                                                                                                                |
| Lachesis_group0__13_contigs__l.g2226 | 1519.396 | 216.3284 | 2.813125 | 3.22E-06 | 0.000181 | 1158 | - && Q01752.1 RecName: Full=Aryl-alcohol dehydrogenase [NADP(+)]; Short=AAD && PF00248:Aldo/keto reductase family                                                                                                                                                                                                                                                 |

|                                       |          |          |          |          |          |      |                                                                                                                                                                                                                                                                                                     |
|---------------------------------------|----------|----------|----------|----------|----------|------|-----------------------------------------------------------------------------------------------------------------------------------------------------------------------------------------------------------------------------------------------------------------------------------------------------|
| Lachesis_group0__13_contigs__l.g9965  | 945.8727 | 138.9837 | 2.767307 | 4.64E-12 | 1.86E-09 | 1008 | - && Q09923.1 RecName: Full=Aldo-keto reductase yakc [NADP(+)] && PF00248:Aldo/keto reductase family                                                                                                                                                                                                |
| Lachesis_group0__13_contigs__l.g10392 | 443.6222 | 65.67012 | 2.752369 | 7.67E-05 | 0.002137 | 3291 | - && Q04336.1 RecName: Full=Uncharacterized protein YMR196W && PF03200:Glycosyl hydrolase family 63 C-terminal domain                                                                                                                                                                               |
| Lachesis_group0__13_contigs__l.g7939  | 179.9171 | 27.86692 | 2.697168 | 8.15E-05 | 0.002242 | 1812 | - && - && PF15275:PEHE domain                                                                                                                                                                                                                                                                       |
| Lachesis_group0__13_contigs__l.g3942  | 40.66893 | 6.274201 | 2.685897 | 0.004199 | 0.03936  | 1599 | - && - && PF12937:F-box-like                                                                                                                                                                                                                                                                        |
| Lachesis_group0__13_contigs__l.g10103 | 634.6469 | 99.05187 | 2.678008 | 9.72E-05 | 0.002552 | 1041 | - && Q96NR8.3 RecName: Full=Retinol dehydrogenase 12; AltName: Full=All-trans and 9-cis retinol dehydrogenase; AltName: Full=Short chain dehydrogenase/reductase family 7C member 2 && PF00106:short chain dehydrogenase                                                                            |
| Lachesis_group0__13_contigs__l.g11522 | 55.2368  | 8.566259 | 2.668078 | 0.005705 | 0.048918 | 2631 | - && Q96Q89.3 RecName: Full=Kinesin-like protein KIF20B; AltName: Full=Cancer/testis antigen 90; Short=CT90; AltName: Full=Kinesin family member 20B; AltName: Full=Kinesin-related motor interacting with PIN1; AltName: Full=M-phase phosphoprotein 1; Short=MPP1 && PF00225:Kinesin motor domain |
| Lachesis_group0__13_contigs__l.g1269  | 52.78292 | 8.387732 | 2.658844 | 0.002254 | 0.02437  | 954  | - && O74959.1 RecName: Full=Uncharacterized oxidoreductase C736.13 && PF00106:short chain dehydrogenase                                                                                                                                                                                             |
| Lachesis_group0__13_contigs__l.g4879  | 14259.95 | 2275.556 | 2.647785 | 4.06E-07 | 3.37E-05 | 738  | - && O94476.1 RecName: Full=Eukaryotic translation initiation factor 6; Short=eIF-6 && PF01912:eIF-6 family                                                                                                                                                                                         |

|                                       |          |          |          |          |          |      |                                                                                                                                                                                                                                                                                                                                                                                               |
|---------------------------------------|----------|----------|----------|----------|----------|------|-----------------------------------------------------------------------------------------------------------------------------------------------------------------------------------------------------------------------------------------------------------------------------------------------------------------------------------------------------------------------------------------------|
| Lachesis_group0__13_contigs__l.g8469  | 544.7839 | 90.69088 | 2.584224 | 1.40E-08 | 2.12E-06 | 2790 | - && Q9Y804.1 RecName: Full=Fanconi-associated nuclease 1 homolog && PF08774:VRR-NUC domain                                                                                                                                                                                                                                                                                                   |
| Lachesis_group0__13_contigs__l.g5967  | 14301.78 | 2464.648 | 2.536859 | 1.33E-05 | 0.000548 | 474  | - && - && PF01185:Fungal hydrophobin                                                                                                                                                                                                                                                                                                                                                          |
| Lachesis_group0__13_contigs__l.g2537  | 216.6505 | 37.54767 | 2.526825 | 2.49E-05 | 0.000912 | 1293 | - && P59668.1 RecName: Full=Delta(12) fatty acid desaturase; AltName: Full=Delta-12 fatty acid desaturase && PF00487:Fatty acid desaturase                                                                                                                                                                                                                                                    |
| Lachesis_group0__13_contigs__l.g6383  | 36.86763 | 6.42738  | 2.49802  | 0.004771 | 0.043106 | 1746 | - && - && PF12937:F-box-like                                                                                                                                                                                                                                                                                                                                                                  |
| Lachesis_group0__13_contigs__l.g4696  | 8273.53  | 1487.498 | 2.475742 | 4.45E-07 | 3.58E-05 | 798  | - && O23522.2 RecName: Full=Phospholipase A1-Ibeta2, chloroplastic; Flags: Precursor && PF01764:Lipase (class 3)                                                                                                                                                                                                                                                                              |
| Lachesis_group0__13_contigs__l.g10095 | 7631.37  | 1407.814 | 2.438541 | 9.68E-11 | 2.73E-08 | 5748 | - && P78811.2 RecName: Full=Probable UTP--glucose-1-phosphate uridylyltransferase; AltName: Full=UDP-glucose pyrophosphorylase; Short=UDPGP; Short=UGPase && PF08797:HIRAN domain PF00176:SNF2 family N-terminal domain PF00645:Poly(ADP-ribose) polymerase and DNA-Ligase Zn-finger region PF01704:UTP--glucose-1-phosphate uridylyltransferase PF00271:Helicase conserved C-terminal domain |
| Lachesis_group0__13_contigs__l.g9037  | 299.6363 | 55.241   | 2.437353 | 0.000172 | 0.003788 | 1494 | - && P0CS57.1 RecName: Full=DNA damage-binding protein CMR1 >P0CS56.1 RecName: Full=DNA damage-binding protein CMR1 && -                                                                                                                                                                                                                                                                      |
| Lachesis_group0__13_contigs__l.g4605  | 57.9835  | 10.78258 | 2.410028 | 0.003564 | 0.034652 | 1251 | - && Q24168.2 RecName: Full=Origin recognition complex subunit 2; Short=DmORC2 && PF04084:Origin recognition complex subunit 2                                                                                                                                                                                                                                                                |

|                                      |          |          |          |          |          |      |                                                                                                                                        |
|--------------------------------------|----------|----------|----------|----------|----------|------|----------------------------------------------------------------------------------------------------------------------------------------|
| Lachesis_group0__13_contigs__l.g6373 | 1120.956 | 212.3572 | 2.401441 | 2.47E-06 | 0.000146 | 1047 | - && O14295.1 RecName: Full=Pyridoxal reductase; Short=PL reductase; Short=PL-red && PF00248:Aldo/keto reductase family                |
| Lachesis_group0__13_contigs__l.g4688 | 620.0326 | 119.6904 | 2.374734 | 7.15E-09 | 1.17E-06 | 822  | - && Q96DG6.1 RecName: Full=Carboxymethylenebutenolidase homolog && PF01738:Dienelactone hydrolase family                              |
| Lachesis_group0__13_contigs__l.g737  | 123.9889 | 24.10692 | 2.366945 | 0.003377 | 0.033304 | 867  | - && - && PF07264:Etoposide-induced protein 2.4 (EI24)                                                                                 |
| Lachesis_group0__13_contigs__l.g6455 | 1077.361 | 212.7184 | 2.340049 | 1.86E-07 | 1.88E-05 | 1674 | - && - && PF02458:Transferase family                                                                                                   |
| Lachesis_group0__13_contigs__l.g1802 | 927.5551 | 184.7381 | 2.327627 | 2.85E-05 | 0.001001 | 1833 | - && Q9U9A3.2 RecName: Full=Serine/threonine-protein phosphatase 6 catalytic subunit; Short=PP6C && PF00248:Aldo/keto reductase family |
| Lachesis_group0__13_contigs__l.g9876 | 1526.854 | 307.7247 | 2.310997 | 0.000484 | 0.008326 | 1125 | - && - && PF01040:UbiA prenyltransferase family                                                                                        |
| Lachesis_group0__13_contigs__l.g1959 | 2509.306 | 511.2431 | 2.295405 | 9.93E-05 | 0.002578 | 873  | - && - && PF13419:Haloacid dehalogenase-like hydrolase                                                                                 |
| Lachesis_group0__13_contigs__l.g2849 | 62.51274 | 12.82747 | 2.283704 | 0.002323 | 0.024979 | 1881 | - && - && PF12937:F-box-like                                                                                                           |
| Lachesis_group0__13_contigs__l.g5006 | 118.8948 | 24.59447 | 2.267691 | 1.23E-05 | 0.000513 | 825  | - && - && PF01138:3' exoribonuclease family, domain 1                                                                                  |
| Lachesis_group0__13_contigs__l.g829  | 540.2873 | 112.4939 | 2.262236 | 2.89E-05 | 0.001011 | 1440 | - && - && PF01738:Dienelactone hydrolase family                                                                                        |
| Lachesis_group0__13_contigs__l.g7345 | 78.64017 | 16.49541 | 2.241323 | 0.004561 | 0.041714 | 336  | - && - && PF07019:Rab5-interacting protein (Rab5ip)                                                                                    |
| Lachesis_group0__13_contigs__l.g2505 | 5680.178 | 1241.807 | 2.193293 | 0.000104 | 0.00263  | 1947 | - && - && PF01565:FAD binding domain                                                                                                   |
| Lachesis_group0__13_contigs__l.g5553 | 4706.171 | 1041.065 | 2.176335 | 0.000327 | 0.006273 | 1230 | - && Q00859.1 RecName: Full=Mitogen-activated protein kinase; AltName: Full=FsMAPK && PF00069:Protein kinase domain                    |

|                                       |          |          |          |          |          |      |                                                                                                                                                                                                                                   |
|---------------------------------------|----------|----------|----------|----------|----------|------|-----------------------------------------------------------------------------------------------------------------------------------------------------------------------------------------------------------------------------------|
| Lachesis_group0__13_contigs__l.g10646 | 55.37787 | 12.43447 | 2.15249  | 0.001446 | 0.017806 | 750  | - && B6JGU7.1 RecName: Full=ATP-dependent Clp protease proteolytic subunit; AltName: Full=Endopeptidase Clp && PF00574:Clp protease                                                                                               |
| Lachesis_group0__13_contigs__l.g2817  | 49.16137 | 11.181   | 2.139697 | 0.000666 | 0.010376 | 2400 | - && - && PF04082:Fungal specific transcription factor domain                                                                                                                                                                     |
| Lachesis_group0__13_contigs__l.g486   | 52080.77 | 12210.91 | 2.092596 | 0.000214 | 0.00453  | 1758 | - && Q54DY9.1 RecName: Full=Probable mitochondrial chaperone BCS1-B; AltName: Full=BCS1-like protein 2 && PF08740:BCS1 N terminal PF00004:ATPase family associated with various cellular activities (AAA)                         |
| Lachesis_group0__13_contigs__l.g5973  | 5254.939 | 1243.02  | 2.080091 | 8.49E-05 | 0.002305 | 3084 | - && Q9ZVH4.1 RecName: Full=Cullin-3A; Short=AtCUL3a && PF13417:Glutathione S-transferase, N-terminal domain PF00888:Cullin family PF10557:Cullin protein neddylation domain                                                      |
| Lachesis_group0__13_contigs__l.g3748  | 7297.25  | 1736.817 | 2.070723 | 2.30E-05 | 0.000862 | 3198 | - && D4AUF1.1 RecName: Full=WSC domain-containing protein ARB_07867; Flags: Precursor && PF01822:WSC domain PF07250:Glyoxal oxidase N-terminus PF09118:Domain of unknown function (DUF1929)                                       |
| Lachesis_group0__13_contigs__l.g1086  | 1122.422 | 267.6793 | 2.069163 | 3.61E-06 | 0.000197 | 2319 | - && Q80Z60.2 RecName: Full=Endothelin-converting enzyme 2; Short=ECE-2; Includes: RecName: Full=Methyltransferase-like region; Includes: RecName: Full=Endothelin-converting enzyme 2 region && PF08241:Methyltransferase domain |

|                                       |          |          |          |          |          |      |                                                                                                                                                                                                         |
|---------------------------------------|----------|----------|----------|----------|----------|------|---------------------------------------------------------------------------------------------------------------------------------------------------------------------------------------------------------|
| Lachesis_group0__13_contigs__l.g3306  | 58.26505 | 14.00964 | 2.05699  | 0.00057  | 0.009377 | 306  | - && Q4P8G2.1 RecName: Full=Diphthamide biosynthesis protein 3 && PF05207:CSL zinc finger                                                                                                               |
| Lachesis_group0__13_contigs__l.g9807  | 1022.162 | 247.5099 | 2.046931 | 2.76E-06 | 0.000158 | 1260 | - && - && PF14976:FAM72 protein                                                                                                                                                                         |
| Lachesis_group0__13_contigs__l.g1758  | 1033.572 | 253.7354 | 2.02573  | 7.56E-06 | 0.000351 | 1032 | - && Q09923.1 RecName: Full=Aldo-keto reductase yakc [NADP(+)] && PF00248:Aldo/keto reductase family                                                                                                    |
| Lachesis_group0__13_contigs__l.g1803  | 375.2914 | 92.93757 | 2.011814 | 1.34E-06 | 8.79E-05 | 1038 | - && B9WYE6.1 RecName: Full=Versiconal hemiacetal acetate reductase; AltName: Full=VHA reductase && PF00248:Aldo/keto reductase family                                                                  |
| Lachesis_group0__13_contigs__l.g152   | 430.0907 | 106.9808 | 2.010327 | 4.44E-05 | 0.001406 | 1329 | - && Q08980.1 RecName: Full=Probable transport protein YPL264C && PF00892:EamA-like transporter family                                                                                                  |
| Lachesis_group0__13_contigs__l.g7222  | 4854.499 | 1221.51  | 1.990881 | 0.005208 | 0.045905 | 381  | - && P16934.1 RecName: Full=Fruiting body protein SC4; AltName: Full=Hydrophobin SC4; Flags: Precursor && PF01185:Fungal hydrophobin                                                                    |
| Lachesis_group0__13_contigs__l.g10100 | 4187.574 | 1054.561 | 1.989448 | 0.00364  | 0.035332 | 1488 | - && Q9LK73.1 RecName: Full=UDP-glycosyltransferase 88A1 && PF00201:UDP-glucoronosyl and UDP-glucosyl transferase                                                                                       |
| Lachesis_group0__13_contigs__l.g6869  | 131.7109 | 33.66374 | 1.974883 | 0.000418 | 0.007523 | 978  | - && Q7XA87.1 RecName: Full=Folate transporter 1, chloroplastic; Short=AtFOLT1 && PF00153:Mitochondrial carrier protein                                                                                 |
| Lachesis_group0__13_contigs__l.g6629  | 1294.661 | 330.1164 | 1.971978 | 1.93E-07 | 1.92E-05 | 483  | - && O74866.1 RecName: Full=Riboflavin kinase; AltName: Full=ATP:riboflavin 5'-phosphotransferase; AltName: Full=Flavin mononucleotide kinase 1; AltName: Full=Flavokinase && PF01687:Riboflavin kinase |

|                                       |          |          |          |          |          |      |                                                                                                                                                                                                                                                                                     |
|---------------------------------------|----------|----------|----------|----------|----------|------|-------------------------------------------------------------------------------------------------------------------------------------------------------------------------------------------------------------------------------------------------------------------------------------|
| Lachesis_group0__13_contigs__l.g2190  | 2877.781 | 737.255  | 1.965207 | 0.000342 | 0.006464 | 747  | - && - && PF04140:Isoprenylcysteine carboxyl methyltransferase (ICMT) family                                                                                                                                                                                                        |
| Lachesis_group0__13_contigs__l.g27    | 125.0362 | 32.02257 | 1.959621 | 0.000578 | 0.009477 | 918  | - && - && PF06221:Putative zinc finger motif, C2HC5-type                                                                                                                                                                                                                            |
| Lachesis_group0__13_contigs__l.g2089  | 661.6419 | 171.3743 | 1.949725 | 0.000124 | 0.002991 | 570  | - && B0D4L0.1 RecName: Full=Signal peptidase complex catalytic subunit SEC11; AltName: Full=Signal peptidase I && PF00717:Peptidase S24-like                                                                                                                                        |
| Lachesis_group0__13_contigs__l.g8088  | 219.7211 | 57.71943 | 1.925937 | 8.07E-05 | 0.002226 | 1734 | - && O94725.1 RecName: Full=Protein-glutamate O-methyltransferase C1393.13 && PF01937:Protein of unknown function DUF89                                                                                                                                                             |
| Lachesis_group0__13_contigs__l.g11288 | 220.4832 | 58.17745 | 1.921254 | 4.35E-06 | 0.000229 | 681  | - && Q8VY97.1 RecName: Full=ER membrane protein complex subunit 7 homolog; Flags: Precursor && PF09430:Protein of unknown function (DUF2012)                                                                                                                                        |
| Lachesis_group0__13_contigs__l.g8052  | 329.0748 | 87.02061 | 1.918427 | 0.002976 | 0.030315 | 2613 | - && - && PF12937:F-box-like                                                                                                                                                                                                                                                        |
| Lachesis_group0__13_contigs__l.g4387  | 765.8853 | 202.7471 | 1.917682 | 1.45E-07 | 1.55E-05 | 2463 | - && Q5F389.2 RecName: Full=WW domain-containing oxidoreductase && PF00106:short chain dehydrogenase                                                                                                                                                                                |
| Lachesis_group0__13_contigs__l.g9875  | 12825.37 | 3414.239 | 1.90946  | 0.000356 | 0.00664  | 1671 | - && P64264.1 RecName: Full=Uncharacterized GMC-type oxidoreductase Mb1310 >P9WMV4.1 RecName: Full=Uncharacterized GMC-type oxidoreductase MT1316 >P9WMV5.1 RecName: Full=Uncharacterized GMC-type oxidoreductase Rv1279 && PF00732:GMC oxidoreductase   PF05199:GMC oxidoreductase |

|                                       |          |          |          |          |          |      |                                                                                                                                                                                                                                                                                  |
|---------------------------------------|----------|----------|----------|----------|----------|------|----------------------------------------------------------------------------------------------------------------------------------------------------------------------------------------------------------------------------------------------------------------------------------|
| Lachesis_group0__13_contigs__l.g2166  | 12661.91 | 3383.449 | 1.903891 | 2.68E-05 | 0.000959 | 1437 | - && Q12618.1 RecName: Full=Acyl-CoA desaturase; AltName: Full=Delta(9)-desaturase; Short=Delta-9 desaturase; AltName: Full=Fatty acid desaturase; AltName: Full=Stearoyl-CoA desaturase && PF00487:Fatty acid desaturase PF00173:Cytochrome b5-like Heme/Steroid binding domain |
| Lachesis_group0__13_contigs__l.g10381 | 186.7591 | 50.2668  | 1.896207 | 0.000979 | 0.013778 | 1665 | - && - && PF07535:DBF zinc finger PF08630:Dfp1/Him1, central region                                                                                                                                                                                                              |
| Lachesis_group0__13_contigs__l.g4951  | 89.92738 | 24.08688 | 1.893885 | 0.001362 | 0.017029 | 690  | - && - && PF09725:Folate-sensitive fragile site protein Fra10Ac1                                                                                                                                                                                                                 |
| Lachesis_group0__13_contigs__l.g10628 | 1243.762 | 337.3371 | 1.88193  | 0.000836 | 0.012309 | 1728 | - && - && PF00026:Eukaryotic aspartyl protease                                                                                                                                                                                                                                   |
| Lachesis_group0__13_contigs__l.g4768  | 14819.08 | 4095.076 | 1.855553 | 3.60E-06 | 0.000197 | 1335 | - && P59668.1 RecName: Full=Delta(12) fatty acid desaturase; AltName: Full=Delta-12 fatty acid desaturase && PF00487:Fatty acid desaturase                                                                                                                                       |
| Lachesis_group0__13_contigs__l.g3389  | 650.1304 | 180.0676 | 1.85061  | 7.65E-05 | 0.002137 | 1875 | - && O94528.1 RecName: Full=Caffeine resistance protein 5 && PF07690:Major Facilitator Superfamily                                                                                                                                                                               |
| Lachesis_group0__13_contigs__l.g637   | 190.3496 | 52.99143 | 1.848165 | 0.000104 | 0.002628 | 291  | - && - && PF10270:Membrane magnesium transporter                                                                                                                                                                                                                                 |
| Lachesis_group0__13_contigs__l.g7233  | 320.0375 | 89.49748 | 1.835882 | 0.001658 | 0.019514 | 477  | - && Q9UTI3.1 RecName: Full=N-terminal acetyltransferase A complex catalytic subunit ard1; Short=NatA complex subunit ARD1 && PF00583:Acetyltransferase (GNAT) family                                                                                                            |
| Lachesis_group0__13_contigs__l.g6036  | 382.4533 | 107.5154 | 1.831006 | 1.90E-05 | 0.000737 | 3510 | - && P28706.2 RecName: Full=DNA repair protein rad13 && PF00752:XPG N-terminal domain PF00867:XPG I-region                                                                                                                                                                       |



|                                       |          |          |          |          |          |      |                                                                                                                                                                                                                                                                                                                                                                                                      |
|---------------------------------------|----------|----------|----------|----------|----------|------|------------------------------------------------------------------------------------------------------------------------------------------------------------------------------------------------------------------------------------------------------------------------------------------------------------------------------------------------------------------------------------------------------|
| Lachesis_group0__13_contigs__l.g8732  | 419.5861 | 118.2812 | 1.825608 | 0.000461 | 0.008023 | 1620 | - && Q04792.1 RecName: Full=Glutamate decarboxylase; Short=GAD && PF00282:Pyridoxal-dependent decarboxylase conserved domain                                                                                                                                                                                                                                                                         |
| Lachesis_group0__13_contigs__l.g6559  | 620.9238 | 175.6802 | 1.820771 | 0.000246 | 0.005127 | 1413 | - && Q9V345.1 RecName: Full=COP9 signalosome complex subunit 4; Short=Dch4; Short=Signalosome subunit 4 && PF01399:PCI domain                                                                                                                                                                                                                                                                        |
| Lachesis_group0__13_contigs__l.g7     | 19154.05 | 5436.266 | 1.816978 | 0.00248  | 0.026342 | 1914 | - && - && PF00320:GATA zinc finger                                                                                                                                                                                                                                                                                                                                                                   |
| Lachesis_group0__13_contigs__l.g2552  | 527.8103 | 150.7904 | 1.807093 | 3.75E-06 | 0.000202 | 1320 | - && Q8VYR0.1 RecName: Full=Calcium uniporter protein 5, mitochondrial; Flags: Precursor && PF04678:Mitochondrial calcium uniporter                                                                                                                                                                                                                                                                  |
| Lachesis_group0__13_contigs__l.g2237  | 299.4691 | 85.48982 | 1.805799 | 0.000793 | 0.011786 | 1740 | - && - && PF12937:F-box-like                                                                                                                                                                                                                                                                                                                                                                         |
| Lachesis_group0__13_contigs__l.g10104 | 289.3798 | 83.02634 | 1.79989  | 0.005269 | 0.046211 | 1041 | - && Q8TC12.2 RecName: Full=Retinol dehydrogenase 11; AltName: Full=Androgen-regulated short-chain dehydrogenase/reductase 1; AltName: Full=HCV core-binding protein HCBP12; AltName: Full=Prostate short-chain dehydrogenase/reductase 1; AltName: Full=Retinal reductase 1; Short=RalR1; AltName: Full=Short chain dehydrogenase/reductase family 7C member 1 && PF00106:short chain dehydrogenase |
| Lachesis_group0__13_contigs__l.g1964  | 2464.891 | 711.2249 | 1.793588 | 0.000912 | 0.013161 | 1575 | - && - && PF01062:Bestrophin, RFP-TM, chloride channel                                                                                                                                                                                                                                                                                                                                               |
| Lachesis_group0__13_contigs__l.g4275  | 423.7915 | 122.575  | 1.787141 | 0.000139 | 0.003262 | 492  | - && - && PF09451:Autophagy-related protein 27                                                                                                                                                                                                                                                                                                                                                       |
| Lachesis_group0__13_contigs__l.g7946  | 1607.337 | 469.0463 | 1.777674 | 0.003174 | 0.031721 | 1371 | - && Q54EW2.1 RecName: Full=Putative bifunctional amine oxidase DDB_G0291301; Includes: RecName: Full=Putative sarcosine oxidase;                                                                                                                                                                                                                                                                    |

|                                       |          |          |          |          |          |      |                                                                                                                                                                                                             |
|---------------------------------------|----------|----------|----------|----------|----------|------|-------------------------------------------------------------------------------------------------------------------------------------------------------------------------------------------------------------|
|                                       |          |          |          |          |          |      | Short=PSO; Includes: RecName: Full=Putative L-amino-acid oxidase && PF01266:FAD dependent oxidoreductase                                                                                                    |
| Lachesis_group0__13_contigs__l.g10005 | 68.90174 | 20.1397  | 1.77166  | 0.005022 | 0.044677 | 882  | - && - && PF12695:Alpha/beta hydrolase family                                                                                                                                                               |
| Lachesis_group0__13_contigs__l.g1154  | 111.838  | 32.79825 | 1.768979 | 0.00102  | 0.014103 | 1797 | - && - && PF12937:F-box-like                                                                                                                                                                                |
| Lachesis_group0__13_contigs__l.g6365  | 259.3775 | 76.68904 | 1.760992 | 0.00106  | 0.014389 | 609  | - && Q9P7I9.1 RecName: Full=Endosomal protein P24B; Flags: Precursor && PF01105:emp24/gp25L/p24 family/GOLD                                                                                                 |
| Lachesis_group0__13_contigs__l.g10605 | 766.2658 | 227.1046 | 1.755705 | 6.03E-05 | 0.001765 | 1161 | - && Q9UT34.1 RecName: Full=Uncharacterized protein C824.09c && PF01412:Putative GTPase activating protein for Arf                                                                                          |
| Lachesis_group0__13_contigs__l.g2419  | 89.51813 | 26.60495 | 1.742584 | 0.003655 | 0.035407 | 1119 | - && P0CS31.1 RecName: Full=Probable cytosolic iron-sulfur protein assembly protein 1 >P0CS30.1 RecName: Full=Probable cytosolic iron-sulfur protein assembly protein 1 && PF00400:WD domain, G-beta repeat |
| Lachesis_group0__13_contigs__l.g8820  | 826.0265 | 247.7378 | 1.737816 | 0.000122 | 0.002955 | 543  | - && Q9D187.1 RecName: Full=Mitotic spindle-associated MMXD complex subunit MIP18; AltName: Full=Protein FAM96B && PF01883:Domain of unknown function DUF59                                                 |
| Lachesis_group0__13_contigs__l.g1070  | 265.1424 | 80.19548 | 1.727823 | 0.000536 | 0.008957 | 1710 | - && - && PF12937:F-box-like                                                                                                                                                                                |
| Lachesis_group0__13_contigs__l.g2642  | 1027.078 | 310.3598 | 1.727471 | 0.000515 | 0.008676 | 1029 | - && Q06466.1 RecName: Full=Putative vacuolar protein sorting-associated protein TDA6; AltName: Full=Topoisomerase I damage affected protein 6 && PF06101:Plant protein of unknown function (DUF946)        |

|                                      |          |          |          |          |          |      |                                                                                                                                                                                                |
|--------------------------------------|----------|----------|----------|----------|----------|------|------------------------------------------------------------------------------------------------------------------------------------------------------------------------------------------------|
| Lachesis_group0__13_contigs__l.g3567 | 406.0879 | 123.0942 | 1.723056 | 0.004194 | 0.03936  | 915  | - && A8NWP2.2 RecName: Full=NAD-dependent protein deacylase; AltName: Full=Regulatory protein SIR2 homolog 5; Flags: Precursor && PF02146:Sir2 family                                          |
| Lachesis_group0__13_contigs__l.g2527 | 4678.737 | 1421.345 | 1.719138 | 0.004887 | 0.043815 | 891  | - && - && PF04140:Isoprenylcysteine carboxyl methyltransferase (ICMT) family                                                                                                                   |
| Lachesis_group0__13_contigs__l.g6206 | 3423.678 | 1044.766 | 1.712582 | 3.79E-05 | 0.001227 | 1089 | - && Q6IE26.2 RecName: Full=Epoxide hydrolase 4; AltName: Full=Abhydrolase domain-containing protein 7; AltName: Full=Epoxide hydrolase-related protein && PF12697:Alpha/beta hydrolase family |
| Lachesis_group0__13_contigs__l.g9340 | 259.8817 | 79.43204 | 1.70704  | 0.000151 | 0.003459 | 888  | - && Q9Y7M5.2 RecName: Full=54S ribosomal protein L10, mitochondrial; Flags: Precursor && PF00828:Ribosomal protein L18e/L15                                                                   |
| Lachesis_group0__13_contigs__l.g3984 | 940.2132 | 288.2868 | 1.70618  | 6.89E-05 | 0.001975 | 612  | - && Q5U3N0.1 RecName: Full=Pleckstrin homology domain-containing family A member 8; Short=PH domain-containing family A member 8 && PF08718:Glycolipid transfer protein (GLTP)                |
| Lachesis_group0__13_contigs__l.g1296 | 379.2958 | 117.0427 | 1.69439  | 0.000126 | 0.003006 | 1386 | - && C5PEI9.1 RecName: Full=Aspartic protease PEP3; Flags: Precursor && PF00026:Eukaryotic aspartyl protease                                                                                   |
| Lachesis_group0__13_contigs__l.g2357 | 1091.156 | 339.8315 | 1.683267 | 0.000153 | 0.003478 | 1101 | - && Q4P804.1 RecName: Full=COP9 signalosome complex subunit 5 && PF01398:JAB1/Mov34/MPN/PAD-1 ubiquitin protease                                                                              |
| Lachesis_group0__13_contigs__l.g7697 | 5662.127 | 1763.062 | 1.683186 | 5.53E-05 | 0.001659 | 4458 | - && P41820.1 RecName: Full=Brefeldin A resistance protein && PF14510:ABC-transporter extracellular                                                                                            |

|                                       |          |          |          |          |          |      |                                                                                                                                                                                                                            |
|---------------------------------------|----------|----------|----------|----------|----------|------|----------------------------------------------------------------------------------------------------------------------------------------------------------------------------------------------------------------------------|
|                                       |          |          |          |          |          |      | N-terminal   PF00005:ABC transporter   PF06422:CDR ABC transporter   PF01061:ABC-2 type transporter                                                                                                                        |
| Lachesis_group0__13_contigs__l.g7479  | 294.1218 | 91.94482 | 1.675025 | 0.004674 | 0.042378 | 1509 | - && - && PF02205:WH2 motif                                                                                                                                                                                                |
| Lachesis_group0__13_contigs__l.g2350  | 155.1829 | 48.72311 | 1.674329 | 0.000325 | 0.006264 | 1329 | - && P53011.1 RecName: Full=Nucleoporin SEH1; AltName: Full=Nuclear pore protein SEH1; AltName: Full=SEC13 homolog 1 && -                                                                                                  |
| Lachesis_group0__13_contigs__l.g1481  | 538.9994 | 169.8691 | 1.664628 | 7.92E-05 | 0.00219  | 1416 | - && C5G0A8.1 RecName: Full=Probable leucine aminopeptidase MCGY_08380; AltName: Full=Leucyl aminopeptidase MCGY_08380; Flags: Precursor && PF04389:Peptidase family M28                                                   |
| Lachesis_group0__13_contigs__l.g55    | 196.3604 | 63.04736 | 1.642066 | 0.001031 | 0.014202 | 1023 | - && P41838.1 RecName: Full=Poly(A)+ RNA export protein && -                                                                                                                                                               |
| Lachesis_group0__13_contigs__l.g11223 | 1054.526 | 338.0285 | 1.641299 | 5.95E-06 | 0.000293 | 3888 | - && Q9M8Y0.1 RecName: Full=Probable UDP-N-acetylglucosamine--peptide N-acetylglucosaminyltransferase SEC; AltName: Full=Protein SECRET AGENT && PF13844:Glycosyl transferase family 41   PF13424:Tetratricopeptide repeat |
| Lachesis_group0__13_contigs__l.g6674  | 95.96958 | 30.83218 | 1.638418 | 0.000986 | 0.01384  | 1935 | - && - && PF04129:Vps52 / Sac2 family                                                                                                                                                                                      |
| Lachesis_group0__13_contigs__l.g1677  | 25368.66 | 8155.93  | 1.637159 | 0.000215 | 0.004543 | 468  | - && - && PF16850:Peptidase inhibitor I66                                                                                                                                                                                  |
| Lachesis_group0__13_contigs__l.g7346  | 768.839  | 247.8295 | 1.633536 | 7.22E-05 | 0.002035 | 1116 | - && P78780.2 RecName: Full=Probable aspartate-semialdehyde dehydrogenase; Short=ASA dehydrogenase; Short=ASADH; AltName: Full=Aspartate-beta-semialdehyde dehydrogenase && PF01118:Semialdehyde dehydrogenase, NAD        |

|                                       |          |          |          |          |          |      |                                                                                                                                                                                                                                                                  |
|---------------------------------------|----------|----------|----------|----------|----------|------|------------------------------------------------------------------------------------------------------------------------------------------------------------------------------------------------------------------------------------------------------------------|
|                                       |          |          |          |          |          |      | binding domain PF02774:Semialdehyde dehydrogenase, dimerisation domain                                                                                                                                                                                           |
| Lachesis_group0__13_contigs__l.g6371  | 1412.999 | 455.7202 | 1.632689 | 0.001023 | 0.014113 | 1038 | - && O14295.1 RecName: Full=Pyridoxal reductase; Short=PL reductase; Short=PL-red && PF00248:Aldo/keto reductase family                                                                                                                                          |
| Lachesis_group0__13_contigs__l.g5704  | 668.8047 | 215.8851 | 1.632669 | 0.00045  | 0.007899 | 2973 | - && - && PF00498:FHA domain                                                                                                                                                                                                                                     |
| Lachesis_group0__13_contigs__l.g9964  | 2903.463 | 936.6558 | 1.632306 | 0.003504 | 0.034204 | 1026 | - && - && PF04909:Amidohydrolase                                                                                                                                                                                                                                 |
| Lachesis_group0__13_contigs__l.g5966  | 7541.137 | 2438.548 | 1.62889  | 0.000595 | 0.00962  | 324  | - && - && PF01185:Fungal hydrophobin                                                                                                                                                                                                                             |
| Lachesis_group0__13_contigs__l.g10211 | 1662.756 | 537.7866 | 1.62844  | 0.000584 | 0.009507 | 1995 | - && D2XV59.1 RecName: Full=GTP-binding protein 1 && PF03144:Elongation factor Tu domain 2 PF00009:Elongation factor Tu GTP binding domain                                                                                                                       |
| Lachesis_group0__13_contigs__l.g3643  | 884.9014 | 289.0368 | 1.613883 | 0.000205 | 0.004374 | 1389 | - && P47154.1 RecName: Full=CAAX prenyl protease 1; AltName: Full=A-factor-converting enzyme; AltName: Full=Prenyl protein-specific endoprotease 1; Short=PPSEP 1 && PF16491:CAAX prenyl protease N-terminal, five membrane helices PF01435:Peptidase family M48 |
| Lachesis_group0__13_contigs__l.g2908  | 2906.243 | 950.7543 | 1.61209  | 0.000161 | 0.003628 | 1992 | - && O42773.1 RecName: Full=Serine/threonine-protein phosphatase 2B catalytic subunit A1; AltName: Full=Calcineurin A1 && PF00149:Calcineurin-like phosphoesterase                                                                                               |
| Lachesis_group0__13_contigs__l.g11636 | 7407.67  | 2426.974 | 1.609955 | 9.00E-05 | 0.002405 | 1569 | - && A1CFL5.1 RecName: Full=Cytochrome P450 monooxygenase patH; AltName: Full=Patulin synthesis protein H; AltName: Full=m-cresol                                                                                                                                |

|                                       |          |          |          |          |          |      |                                                                                                                                                                                                                                            |
|---------------------------------------|----------|----------|----------|----------|----------|------|--------------------------------------------------------------------------------------------------------------------------------------------------------------------------------------------------------------------------------------------|
|                                       |          |          |          |          |          |      | hydrolase;      Flags:      Precursor      &&<br>PF00067:Cytochrome P450                                                                                                                                                                   |
| Lachesis_group0__13_contigs__l.g8905  | 2970.764 | 974.2429 | 1.608618 | 0.000865 | 0.012669 | 1686 | - && Q01772.1 RecName: Full=Aldehyde oxidase GLOX; AltName: Full=Glyoxal oxidase; Short=GLOX; Flags: Precursor && PF07250:Glyoxal oxidase N-terminus PF09118:Domain of unknown function (DUF1929)                                          |
| Lachesis_group0__13_contigs__l.g8171  | 62472.28 | 20546.15 | 1.604354 | 0.000115 | 0.002841 | 1608 | - && P39992.1 RecName: Full=Uncharacterized protein YEL023C && PF09994:Uncharacterized alpha/beta hydrolase domain (DUF2235)                                                                                                               |
| Lachesis_group0__13_contigs__l.g114   | 419.3273 | 138.1474 | 1.601034 | 3.39E-05 | 0.001137 | 1272 | - && - && PF01694:Rhomboïd family                                                                                                                                                                                                          |
| Lachesis_group0__13_contigs__l.g4690  | 403.0854 | 133.2341 | 1.598896 | 0.001565 | 0.018697 | 981  | - && - && PF01738:Dienelactone hydrolase family                                                                                                                                                                                            |
| Lachesis_group0__13_contigs__l.g9881  | 376.7301 | 124.3812 | 1.596793 | 0.00263  | 0.027515 | 1173 | - && O74995.1 RecName: Full=TFIIH basal transcription factor complex p47 subunit; AltName: Full=Suppressor of stem-loop protein 1 homolog; Short=SSL1 homolog && PF04056:Ssl1-like                                                         |
| Lachesis_group0__13_contigs__l.g82    | 9238.004 | 3055.181 | 1.596342 | 5.63E-06 | 0.000279 | 1479 | - && - && PF01823:MAC/Perforin domain                                                                                                                                                                                                      |
| Lachesis_group0__13_contigs__l.g1963  | 449.8518 | 149.5128 | 1.589358 | 5.50E-05 | 0.001657 | 1452 | - && - && PF04577:Protein of unknown function (DUF563)                                                                                                                                                                                     |
| Lachesis_group0__13_contigs__l.g4001  | 449.7551 | 149.7124 | 1.587862 | 0.000264 | 0.005358 | 423  | - && - && PF13380:CoA binding domain                                                                                                                                                                                                       |
| Lachesis_group0__13_contigs__l.g11566 | 349.9125 | 116.4378 | 1.587268 | 0.005806 | 0.049628 | 1155 | - && P53871.1 RecName: Full=Probable glutamine amidotransferase DUG3; AltName: Full=Deficient in utilization of glutathione protein 3; AltName: Full=GSH degradosomal complex subunit DUG3 && PF13230:Glutamine amidotransferases class-II |

|                                       |          |          |          |          |          |      |                                                                                                                                                                                                                                                                                                                                                                                 |
|---------------------------------------|----------|----------|----------|----------|----------|------|---------------------------------------------------------------------------------------------------------------------------------------------------------------------------------------------------------------------------------------------------------------------------------------------------------------------------------------------------------------------------------|
| Lachesis_group0__13_contigs__l.g4004  | 3574.046 | 1193.109 | 1.582811 | 9.98E-05 | 0.002578 | 663  | - && O94255.2 RecName: Full=Carbonic anhydrase; AltName: Full=Carbonate dehydratase && PF00484:Carbonic anhydrase                                                                                                                                                                                                                                                               |
| Lachesis_group0__13_contigs__l.g1116  | 547.9249 | 183.0762 | 1.581683 | 3.63E-05 | 0.001188 | 1038 | - && - && PF13383:Methyltransferase domain                                                                                                                                                                                                                                                                                                                                      |
| Lachesis_group0__13_contigs__l.g5900  | 4476.047 | 1497.849 | 1.579401 | 6.34E-06 | 0.000305 | 2928 | - && Q03516.1 RecName: Full=Uncharacterized protein RSN1; AltName: Full=Rescuer of SRO7 at high Nacl protein 1 && PF02714:Calcium-dependent channel, 7TM region, putative phosphate PF13967:Late exocytosis, associated with Golgi transport PF12621:Extracellular tail, of 10TM putative phosphate transporter PF14703:Cytosolic domain of 10TM putative phosphate transporter |
| Lachesis_group0__13_contigs__l.g8696  | 226.5399 | 75.77202 | 1.578951 | 0.000274 | 0.005481 | 1659 | - && P34809.3 RecName: Full=Glycylpeptide N-tetradecanoyltransferase; AltName: Full=Myristoyl-CoA:protein N-myristoyltransferase; Short=NMT; AltName: Full=Peptide N-myristoyltransferase && PF01233:Myristoyl-CoA:protein N-myristoyltransferase, N-terminal domain PF02799:Myristoyl-CoA:protein N-myristoyltransferase, C-terminal domain                                    |
| Lachesis_group0__13_contigs__l.g6386  | 433.8141 | 145.1652 | 1.5788   | 0.000124 | 0.002996 | 2019 | - && - && PF13041:PPR repeat family                                                                                                                                                                                                                                                                                                                                             |
| Lachesis_group0__13_contigs__l.g11214 | 149.412  | 50.48837 | 1.570059 | 0.00141  | 0.017525 | 1137 | - && P42023.1 RecName: Full=Actin-2; AltName: Full=Actin II; AltName: Full=Centractin-like protein [Pneumocystis carinii] && PF00022:Actin                                                                                                                                                                                                                                      |
| Lachesis_group0__13_contigs__l.g11530 | 1815.246 | 611.5205 | 1.57     | 2.72E-05 | 0.000969 | 1911 | - && A8N2M6.1 RecName: Full=Amino-acid acetyltransferase, mitochondrial; AltName:                                                                                                                                                                                                                                                                                               |

|                                      |          |          |          |          |          |      |                                                                                                                                                                                                                                                                                                                                                                                                                                                           |
|--------------------------------------|----------|----------|----------|----------|----------|------|-----------------------------------------------------------------------------------------------------------------------------------------------------------------------------------------------------------------------------------------------------------------------------------------------------------------------------------------------------------------------------------------------------------------------------------------------------------|
|                                      |          |          |          |          |          |      | Full=Arginine-requiring protein 2; AltName: Full=Glutamate N-acetyltransferase; AltName: Full=N-acetylglutamate synthase; Short=AGS; Short=NAGS; Flags: Precursor && PF04768:NAT, N-acetyltransferase, of N-acetylglutamate synthase                                                                                                                                                                                                                      |
| Lachesis_group0__13_contigs__l.g171  | 5996.916 | 2026.979 | 1.564977 | 0.001129 | 0.014919 | 6705 | - && P78820.2 RecName: Full=Acetyl-CoA carboxylase; Short=ACC; AltName: Full=Cell untimely torn protein 6; Includes: RecName: Full=Biotin carboxylase && PF01039:Carboxyl transferase domain PF02786:Carbamoyl-phosphate synthase L chain, ATP binding domain PF08326:Acetyl-CoA carboxylase, central region PF02785:Biotin carboxylase C-terminal domain PF00289:Carbamoyl-phosphate synthase L chain, N-terminal domain PF00364:Biotin-requiring enzyme |
| Lachesis_group0__13_contigs__l.g2416 | 337.0874 | 114.4153 | 1.561166 | 0.00104  | 0.014228 | 3228 | - && Q9P7S5.1 RecName: Full=Probable ubiquitin carboxyl-terminal hydrolase 7; AltName: Full=Deubiquitinating enzyme 7; AltName: Full=Ubiquitin thioesterase 7; AltName: Full=Ubiquitin-specific-processing protease 7 && PF00443:Ubiquitin carboxyl-terminal hydrolase                                                                                                                                                                                    |
| Lachesis_group0__13_contigs__l.g7696 | 168.598  | 57.30472 | 1.559015 | 0.000858 | 0.012572 | 1758 | - && Q0UG00.1 RecName: Full=ATP-dependent RNA helicase MSS116, mitochondrial; Flags: Precursor && PF00271:Helicase conserved C-                                                                                                                                                                                                                                                                                                                           |



|                                       |          |          |          |          |          |      |                                                                                                                                                                                                                                                                                                                                                                              |
|---------------------------------------|----------|----------|----------|----------|----------|------|------------------------------------------------------------------------------------------------------------------------------------------------------------------------------------------------------------------------------------------------------------------------------------------------------------------------------------------------------------------------------|
|                                       |          |          |          |          |          |      | terminal domain PF00270:DEAD/DEAH box helicase                                                                                                                                                                                                                                                                                                                               |
| Lachesis_group0__13_contigs__l.g10606 | 739.4234 | 251.0986 | 1.55879  | 0.000102 | 0.002611 | 996  | - && - && PF08690:GET complex subunit GET2                                                                                                                                                                                                                                                                                                                                   |
| Lachesis_group0__13_contigs__l.g6749  | 282.6548 | 96.79323 | 1.549171 | 0.003766 | 0.036285 | 2934 | - && P0CN25.1 RecName: Full=DNA polymerase epsilon subunit B; AltName: Full=DNA polymerase II subunit 2 >P0CN24.1 RecName: Full=DNA polymerase epsilon subunit B; AltName: Full=DNA polymerase II subunit 2 && PF00583:Acetyltransferase (GNAT) family PF04042:DNA polymerase alpha/epsilon subunit B                                                                        |
| Lachesis_group0__13_contigs__l.g9344  | 131.7892 | 45.3096  | 1.542613 | 0.001235 | 0.015782 | 1707 | - && - && PF09739:Mini-chromosome maintenance replisome factor                                                                                                                                                                                                                                                                                                               |
| Lachesis_group0__13_contigs__l.g8023  | 1501.343 | 516.4172 | 1.539976 | 0.000114 | 0.002824 | 1893 | - && - && PF01544:CorA-like Mg2+ transporter protein                                                                                                                                                                                                                                                                                                                         |
| Lachesis_group0__13_contigs__l.g7342  | 139.7942 | 48.26397 | 1.536895 | 0.001946 | 0.021966 | 534  | - && Q5KPF3.1 RecName: Full=Inosine triphosphate pyrophosphatase; Short=ITPase; Short=Inosine triphosphatase; AltName: Full=Non-canonical purine NTP pyrophosphatase; AltName: Full=Non-standard purine NTP pyrophosphatase; AltName: Full=Nucleoside-triphosphate diphosphatase; AltName: Full=Nucleoside-triphosphate pyrophosphatase; Short=NTPase && PF01725:Ham1 family |
| Lachesis_group0__13_contigs__l.g4220  | 3299.989 | 1138.335 | 1.535664 | 2.63E-05 | 0.000953 | 1239 | - && O74803.1 RecName: Full=UV excision repair protein rhp23; AltName: Full=RAD23 homolog &&                                                                                                                                                                                                                                                                                 |

|                                      |          |          |          |          |          |      |                                                                                                                                                                                                                                                                                                                                                                                                                                                      |
|--------------------------------------|----------|----------|----------|----------|----------|------|------------------------------------------------------------------------------------------------------------------------------------------------------------------------------------------------------------------------------------------------------------------------------------------------------------------------------------------------------------------------------------------------------------------------------------------------------|
|                                      |          |          |          |          |          |      | PF09280:XPC-binding domain PF00627:UBA/TS-N domain PF00240:Ubiquitin family                                                                                                                                                                                                                                                                                                                                                                          |
| Lachesis_group0__13_contigs__l.g8795 | 3163.294 | 1094.312 | 1.531224 | 8.35E-05 | 0.002278 | 2028 | - && Q2TZ06.1 RecName: Full=Protein sip5 && -                                                                                                                                                                                                                                                                                                                                                                                                        |
| Lachesis_group0__13_contigs__l.g118  | 495.5396 | 171.42   | 1.531048 | 0.000344 | 0.006491 | 3423 | - && Q27516.2 RecName: Full=Putative cytochrome P450 CYP13A8 && PF00067:Cytochrome P450                                                                                                                                                                                                                                                                                                                                                              |
| Lachesis_group0__13_contigs__l.g8222 | 590.5156 | 204.2054 | 1.530872 | 0.000366 | 0.006807 | 2214 | - && Q8TB72.2 RecName: Full=Pumilio homolog 2; Short=Pumilio-2 && -                                                                                                                                                                                                                                                                                                                                                                                  |
| Lachesis_group0__13_contigs__l.g7406 | 450.4971 | 156.2042 | 1.528131 | 4.49E-05 | 0.001411 | 510  | - && P59998.3 RecName: Full=Actin-related protein 2/3 complex subunit 4; AltName: Full=Arp2/3 complex 20 kDa subunit; Short=p20-ARC >P59999.3 RecName: Full=Actin-related protein 2/3 complex subunit 4; AltName: Full=Arp2/3 complex 20 kDa subunit; Short=p20-ARC >Q148J6.3 RecName: Full=Actin-related protein 2/3 complex subunit 4; AltName: Full=Arp2/3 complex 20 kDa subunit; Short=p20-ARC && PF05856:ARP2/3 complex 20 kDa subunit (ARPC4) |
| Lachesis_group0__13_contigs__l.g1372 | 5798.178 | 2021.351 | 1.520461 | 0.002543 | 0.026786 | 2001 | - && A2QEQ6.1 RecName: Full=Beta-glucuronidase; Short=GlcAase; AltName: Full=Beta-D-glucuronoside glucuronosohydrolase; Flags: Precursor && PF16862:Glycosyl hydrolase family 79 C-terminal beta domain                                                                                                                                                                                                                                              |
| Lachesis_group0__13_contigs__l.g545  | 2501.982 | 873.9235 | 1.517799 | 0.001852 | 0.021159 | 1437 | - && P54872.2 RecName: Full=Hydroxymethylglutaryl-CoA synthase A; Short=HMG-CoA synthase A; AltName: Full=3-hydroxy-3-methylglutaryl coenzyme A synthase A                                                                                                                                                                                                                                                                                           |

|                                       |          |          |          |          |          |      |                                                                                                                                                                                                                                                                                                                                                                                    |
|---------------------------------------|----------|----------|----------|----------|----------|------|------------------------------------------------------------------------------------------------------------------------------------------------------------------------------------------------------------------------------------------------------------------------------------------------------------------------------------------------------------------------------------|
|                                       |          |          |          |          |          |      | && PF01154:Hydroxymethylglutaryl-coenzyme A synthase N terminal PF08540:Hydroxymethylglutaryl-coenzyme A synthase C terminal                                                                                                                                                                                                                                                       |
| Lachesis_group0__13_contigs__l.g8140  | 304.8121 | 106.374  | 1.517242 | 0.001282 | 0.016247 | 1428 | - && Q10209.1 RecName: Full=Uncharacterized J domain-containing protein C4H3.01 && PF00226:DnaJ domain PF14308:X-domain of DnaJ-containing                                                                                                                                                                                                                                         |
| Lachesis_group0__13_contigs__l.g4084  | 2783.363 | 972.922  | 1.516515 | 0.000608 | 0.009747 | 1869 | - && Q9P381.1 RecName: Full=Putative phosphatidate cytidylyltransferase; AltName: Full=CDP-DAG synthase; AltName: Full=CDP-DG synthase; AltName: Full=CDP-diacylglycerol synthase; Short=CDS; AltName: Full=CDP-diglyceride pyrophosphorylase; AltName: Full=CDP-diglyceride synthase; AltName: Full=CTP:phosphatidate cytidylyltransferase && PF01148:Cytidylyltransferase family |
| Lachesis_group0__13_contigs__l.g6623  | 202.3037 | 70.85786 | 1.510871 | 0.001892 | 0.021517 | 1038 | - && - && PF10180:Uncharacterised conserved protein (DUF2373)                                                                                                                                                                                                                                                                                                                      |
| Lachesis_group0__13_contigs__l.g9921  | 4844.842 | 1701.363 | 1.509681 | 0.000265 | 0.005362 | 2154 | - && - && PF04082:Fungal specific transcription factor domain                                                                                                                                                                                                                                                                                                                      |
| Lachesis_group0__13_contigs__l.g5933  | 373.3503 | 131.415  | 1.508696 | 0.001618 | 0.019161 | 1854 | - && - && PF08202:Mis12-Mtw1 protein family                                                                                                                                                                                                                                                                                                                                        |
| Lachesis_group0__13_contigs__l.g11241 | 1159.757 | 407.8841 | 1.507034 | 0.003818 | 0.036581 | 1833 | - && D4AS41.2 RecName: Full=Uncharacterized FAD-linked oxidoreductase ARB_02478; Flags: Precursor && PF01565:FAD binding domain                                                                                                                                                                                                                                                    |

|                                       |          |          |          |          |          |      |                                                                                                                                                                                                                                                                                                                                                                                                                                                                                                                                                                                                                    |
|---------------------------------------|----------|----------|----------|----------|----------|------|--------------------------------------------------------------------------------------------------------------------------------------------------------------------------------------------------------------------------------------------------------------------------------------------------------------------------------------------------------------------------------------------------------------------------------------------------------------------------------------------------------------------------------------------------------------------------------------------------------------------|
| Lachesis_group0__13_contigs__l.g11144 | 1971.118 | 695.3074 | 1.50366  | 0.002141 | 0.023581 | 2019 | - && Q6MG06.1 RecName: Full=Guanine nucleotide-binding protein-like 1 && PF01926:50S ribosome-binding GTPase                                                                                                                                                                                                                                                                                                                                                                                                                                                                                                       |
| Lachesis_group0__13_contigs__l.g5958  | 4665.7   | 1646.144 | 1.503155 | 0.000126 | 0.003006 | 432  | - && P47813.2 RecName: Full=Eukaryotic translation initiation factor 1A, X-chromosomal; Short=eIF-1A X isoform; AltName: Full=Eukaryotic translation initiation factor 4C; Short=eIF-4C >Q5RA42.3 RecName: Full=Eukaryotic translation initiation factor 1A, X-chromosomal; Short=eIF-1A X isoform; AltName: Full=Eukaryotic translation initiation factor 4C; Short=eIF-4C >Q8BMJ3.3 RecName: Full=Eukaryotic translation initiation factor 1A, X-chromosomal; Short=eIF-1A X isoform; AltName: Full=Eukaryotic translation initiation factor 4C; Short=eIF-4C && PF01176:Translation initiation factor 1A / IF-1 |
| Lachesis_group0__13_contigs__l.g9031  | 579.6021 | 204.7559 | 1.502138 | 0.001668 | 0.019552 | 1389 | - && P50514.1 RecName: Full=Probable argininosuccinate lyase; Short=ASAL; AltName: Full=Arginosuccinase && PF00206:Lyase PF14698:Argininosuccinate lyase C-terminal                                                                                                                                                                                                                                                                                                                                                                                                                                                |
| Lachesis_group0__13_contigs__l.g7152  | 2170.302 | 766.7634 | 1.500884 | 0.001077 | 0.0145   | 720  | - && O42901.3 RecName: Full=Uncharacterized protein C119.09c && PF04061:ORMDL family                                                                                                                                                                                                                                                                                                                                                                                                                                                                                                                               |
| Lachesis_group0__13_contigs__l.g9953  | 1947.253 | 688.0647 | 1.500832 | 0.001233 | 0.015777 | 1542 | - && Q5AR55.1 RecName: Full=Cytochrome P450 monooxygenase asqL; AltName: Full=4'-methoxyviridicatin/aspoquinolone biosynthesis                                                                                                                                                                                                                                                                                                                                                                                                                                                                                     |

|                                      |          |          |          |          |          |      |                                                                                                                                                                                                              |
|--------------------------------------|----------|----------|----------|----------|----------|------|--------------------------------------------------------------------------------------------------------------------------------------------------------------------------------------------------------------|
|                                      |          |          |          |          |          |      | cluster protein asqL; AltName: Full=Aspoquinolone biosynthesis protein L && PF00067:Cytochrome P450                                                                                                          |
| Lachesis_group0__13_contigs__l.g7920 | 1731.075 | 612.3828 | 1.499364 | 0.001137 | 0.014994 | 2034 | - && Q9Y7J5.1 RecName: Full=TBC domain-containing protein C1778.09 && PF00566:Rab-GTPase-TBC domain                                                                                                          |
| Lachesis_group0__13_contigs__l.g1552 | 206.6003 | 73.18419 | 1.498752 | 0.000577 | 0.009477 | 993  | - && Q6K9N1.1 RecName: Full=Casein kinase 1; Short=OsCKI1; AltName: Full=Protein HYBRID BREAKDOWN 2; AltName: Full=Protein LOW TEMPERATURE GROWTH 1 && PF00069:Protein kinase domain                         |
| Lachesis_group0__13_contigs__l.g7191 | 1234.434 | 438.6357 | 1.493198 | 0.001406 | 0.017496 | 894  | - && Q4PI88.1 RecName: Full=Eukaryotic translation initiation factor 3 subunit F; Short=eIF3f && PF01398:JAB1/Mov34/MPN/PAD-1 ubiquitin protease PF13012:Maintenance of mitochondrial structure and function |
| Lachesis_group0__13_contigs__l.g2871 | 2007.493 | 713.765  | 1.491902 | 0.000104 | 0.002628 | 5430 | - && Q04781.1 RecName: Full=E3 ubiquitin-protein ligase listerin; AltName: Full=RING domain mutant killed by rtf1 deletion protein 1 && -                                                                    |
| Lachesis_group0__13_contigs__l.g2110 | 1421.323 | 505.7448 | 1.491423 | 0.002735 | 0.028308 | 1356 | - && - && PF11735:Cryptococcal mannosyltransferase 1                                                                                                                                                         |
| Lachesis_group0__13_contigs__l.g6950 | 657.7837 | 236.3397 | 1.476676 | 0.001128 | 0.014919 | 1848 | - && O94547.1 RecName: Full=Serine/threonine-protein kinase srk1; AltName: Full=Sty1-regulated kinase 1 && PF00069:Protein kinase domain                                                                     |
| Lachesis_group0__13_contigs__l.g8957 | 303.9166 | 109.542  | 1.474594 | 0.004181 | 0.039336 | 2202 | - && O60070.1 RecName: Full=Set1 complex component ash2; Short=Set1C component ash2;                                                                                                                         |

|                                       |          |          |          |          |          |      |                                                                                                                                                                                                                      |
|---------------------------------------|----------|----------|----------|----------|----------|------|----------------------------------------------------------------------------------------------------------------------------------------------------------------------------------------------------------------------|
|                                       |          |          |          |          |          |      | AltName: Full=COMPASS component ash2;<br>AltName: Full=Complex proteins associated with<br>set1 protein ash2; AltName: Full=Lid2 complex<br>component ash2; Short=Lid2C component ash2 &&<br>PF00622:SPRY domain     |
| Lachesis_group0__13_contigs__l.g11359 | 301.3355 | 108.6768 | 1.472283 | 0.000407 | 0.007367 | 2445 | - && Q9P7D4.3 RecName: Full=Homocitrate<br>dehydratase, mitochondrial; AltName:<br>Full=Aconitase 2; Flags: Precursor &&<br>PF00694:Aconitase C-terminal<br>domain PF00330:Aconitase family (aconitate<br>hydratase) |
| Lachesis_group0__13_contigs__l.g2107  | 899.9448 | 325.1215 | 1.468864 | 0.000697 | 0.010692 | 1377 | - && Q9VVU5.1 RecName: Full=COP9 signalosome<br>complex subunit 1b; Short=Dch1-2;<br>Short=Signalosome subunit 1b && PF10602:26S<br>proteasome subunit RPN7 PF01399:PCI domain                                       |
| Lachesis_group0__13_contigs__l.g2839  | 209.608  | 75.7641  | 1.466818 | 0.001443 | 0.017806 | 2688 | - && - && PF12937:F-box-like                                                                                                                                                                                         |
| Lachesis_group0__13_contigs__l.g6398  | 568.5269 | 206.2377 | 1.464068 | 0.00094  | 0.013441 | 4278 | - && P87323.1 RecName: Full=Response regulator<br>mcs4; AltName: Full=Mitotic catastrophe suppressor<br>4 && PF00072:Response regulator receiver domain                                                              |
| Lachesis_group0__13_contigs__l.g4034  | 213.4855 | 77.71445 | 1.459318 | 0.001718 | 0.020004 | 1011 | - && Q10248.2 RecName: Full=Uncharacterized<br>mitochondrial carrier C4G9.20c &&<br>PF00153:Mitochondrial carrier protein                                                                                            |
| Lachesis_group0__13_contigs__l.g8164  | 278.0378 | 101.3313 | 1.457896 | 0.000876 | 0.012765 | 1341 | - && P39992.1 RecName: Full=Uncharacterized<br>protein YEL023C && PF09994:Uncharacterized<br>alpha/beta hydrolase domain (DUF2235)                                                                                   |

|                                      |          |          |          |          |          |      |                                                                                                                                                                                                                                                                                                                                                                                                               |
|--------------------------------------|----------|----------|----------|----------|----------|------|---------------------------------------------------------------------------------------------------------------------------------------------------------------------------------------------------------------------------------------------------------------------------------------------------------------------------------------------------------------------------------------------------------------|
| Lachesis_group0__13_contigs__l.g8413 | 397.7163 | 145.2027 | 1.45244  | 0.000397 | 0.007271 | 1290 | - && Q9P7S2.1 RecName: Full=Probable 26S proteasome regulatory subunit rpn6 && PF01399:PCI domain                                                                                                                                                                                                                                                                                                             |
| Lachesis_group0__13_contigs__l.g6782 | 2364.967 | 868.8974 | 1.444555 | 5.54E-05 | 0.001659 | 2532 | - && Q9Y7Y8.1 RecName: Full=Probable glutamine-tRNA ligase; AltName: Full=Glutaminyl-tRNA synthetase; Short=GlnRS && PF03950:tRNA synthetases class I (E and Q), anti-codon binding domain PF04557:Glutaminyl-tRNA synthetase, non-specific RNA binding region part 2 PF00749:tRNA synthetases class I (E and Q), catalytic domain PF04558:Glutaminyl-tRNA synthetase, non-specific RNA binding region part 1 |
| Lachesis_group0__13_contigs__l.g2914 | 417.0924 | 153.6032 | 1.441881 | 0.000205 | 0.004374 | 942  | - && Q9RA05.1 RecName: Full=(-)-trans-carveol dehydrogenase; AltName: Full=(4R,6S)-carveol dehydrogenase; Short=CDH; Short=Carveol dehydrogenase && PF00106:short chain dehydrogenase                                                                                                                                                                                                                         |
| Lachesis_group0__13_contigs__l.g815  | 1128.989 | 417.1465 | 1.436692 | 0.000691 | 0.010646 | 504  | - && Q9CWZ3.3 RecName: Full=RNA-binding protein 8A; AltName: Full=RNA-binding motif protein 8A; AltName: Full=Ribonucleoprotein RBM8A && PF00076:RNA recognition motif. (a.k.a. RRM, RBD, or RNP domain)                                                                                                                                                                                                      |
| Lachesis_group0__13_contigs__l.g5679 | 261.609  | 96.83419 | 1.431332 | 0.001021 | 0.014103 | 675  | - && Q9ZPW2.2 RecName: Full=Anaphase-promoting complex subunit 10; Short=APC10; AltName: Full=Cyclosome subunit 10 &&                                                                                                                                                                                                                                                                                         |

|                                       |          |          |          |          |          |      |                                                                                                                                                                                                                                                                                                  |
|---------------------------------------|----------|----------|----------|----------|----------|------|--------------------------------------------------------------------------------------------------------------------------------------------------------------------------------------------------------------------------------------------------------------------------------------------------|
|                                       |          |          |          |          |          |      | PF03256:Anaphase-promoting complex, subunit 10 (APC10)                                                                                                                                                                                                                                           |
| Lachesis_group0__13_contigs__l.g5871  | 1794.447 | 665.8564 | 1.430011 | 0.001166 | 0.015186 | 999  | - && P20654.1 RecName: Full=Serine/threonine-protein phosphatase PP1 && PF16891:Serine-threonine protein phosphatase N-terminal domain PF00149:Calcineurin-like phosphoesterase                                                                                                                  |
| Lachesis_group0__13_contigs__l.g7520  | 6487.26  | 2407.816 | 1.429799 | 0.004581 | 0.041747 | 2304 | - && P04842.2 RecName: Full=Alcohol oxidase 1; Short=AO 1; Short=AOX 1; AltName: Full=Methanol oxidase 1; Short=MOX 1 >F2QY27.1 RecName: Full=Alcohol oxidase 1; Short=AO 1; Short=AOX 1; AltName: Full=Methanol oxidase 1; Short=MOX 1 && PF00732:GMC oxidoreductase PF05199:GMC oxidoreductase |
| Lachesis_group0__13_contigs__l.g10635 | 643.7551 | 239.0441 | 1.429201 | 0.005261 | 0.046211 | 1791 | - && P38213.2 RecName: Full=Protein DSF2; AltName: Full=Deletion suppressor of MPT5 mutation protein 2 && -                                                                                                                                                                                      |
| Lachesis_group0__13_contigs__l.g10264 | 771.0577 | 288.7144 | 1.417796 | 0.000482 | 0.008303 | 1050 | - && P25605.2 RecName: Full=Acetolactate synthase small subunit, mitochondrial; AltName: Full=Acetohydroxy-acid synthase small subunit; Short=AHAS; Short=ALS; Flags: Precursor && PF10369:Small subunit of acetolactate synthase PF01842:ACT domain                                             |
| Lachesis_group0__13_contigs__l.g8685  | 411.9874 | 154.4791 | 1.41625  | 0.000538 | 0.00898  | 1188 | - && - && PF13324:Grap2 and cyclin-D-interacting                                                                                                                                                                                                                                                 |
| Lachesis_group0__13_contigs__l.g5538  | 135.8472 | 50.99223 | 1.412861 | 0.005021 | 0.044677 | 1629 | - && O23051.1 RecName: Full=Ent-kaurenoic acid oxidase 1; Short=AtKAO1; AltName:                                                                                                                                                                                                                 |



|                                      |          |          |          |          |          |      |                                                                                                                                                                                            |
|--------------------------------------|----------|----------|----------|----------|----------|------|--------------------------------------------------------------------------------------------------------------------------------------------------------------------------------------------|
|                                      |          |          |          |          |          |      | Full=Cytochrome P450 88A3 && PF00067:Cytochrome P450                                                                                                                                       |
| Lachesis_group0__13_contigs__l.g2249 | 558.8529 | 209.9888 | 1.411792 | 0.000261 | 0.005311 | 894  | - && Q6DH23.1 RecName: Full=Vacuolar protein sorting-associated protein 26B-like; AltName: Full=Vesicle protein sorting 26B-like && PF03643:Vacuolar protein sorting-associated protein 26 |
| Lachesis_group0__13_contigs__l.g378  | 655.6125 | 246.732  | 1.409606 | 0.000854 | 0.012545 | 3030 | - && C8VDQ4.1 RecName: Full=Putative GTPase-activating protein AN11010 && PF00566:Rab-GTPase-TBC domain                                                                                    |
| Lachesis_group0__13_contigs__l.g4736 | 717.8925 | 270.3193 | 1.409596 | 0.000223 | 0.0047   | 1344 | - && Q99078.2 RecName: Full=Dual specificity protein kinase FUZ7 && PF00069:Protein kinase domain                                                                                          |
| Lachesis_group0__13_contigs__l.g9227 | 416.0254 | 157.0412 | 1.406398 | 0.000603 | 0.009716 | 1623 | - && P87041.3 RecName: Full=UDP-galactose transporter; AltName: Full=Golgi UDP-Gal transporter && PF04142:Nucleotide-sugar transporter                                                     |
| Lachesis_group0__13_contigs__l.g9583 | 153.0704 | 57.79365 | 1.405011 | 0.0035   | 0.034204 | 1017 | - && A8WFS8.1 RecName: Full=Post-GPI attachment to proteins factor 3; AltName: Full=PER1-like domain-containing protein 1; Flags: Precursor && PF04080:Per1-like                           |
| Lachesis_group0__13_contigs__l.g376  | 588.1287 | 222.7927 | 1.40135  | 0.000393 | 0.007243 | 822  | - && - && PF10021:Uncharacterized protein conserved in bacteria (DUF2263)                                                                                                                  |
| Lachesis_group0__13_contigs__l.g8611 | 957.261  | 362.5867 | 1.400937 | 0.001034 | 0.014217 | 495  | - && P53937.1 RecName: Full=37S ribosomal protein SWS2, mitochondrial; AltName: Full=Sick without                                                                                          |

|                                       |          |          |          |          |          |      |                                                                                                                                                                                                          |
|---------------------------------------|----------|----------|----------|----------|----------|------|----------------------------------------------------------------------------------------------------------------------------------------------------------------------------------------------------------|
|                                       |          |          |          |          |          |      | securin protein 2 && PF00416:Ribosomal protein S13/S18                                                                                                                                                   |
| Lachesis_group0__13_contigs__l.g5734  | 2665.308 | 1014.841 | 1.393068 | 0.00035  | 0.006563 | 1470 | - && Q9UQW9.1 RecName: Full=Ornithine decarboxylase; Short=ODC && PF02784:Pyridoxal-dependent decarboxylase, pyridoxal binding domain PF00278:Pyridoxal-dependent decarboxylase, C-terminal sheet domain |
| Lachesis_group0__13_contigs__l.g7163  | 545.4835 | 207.895  | 1.392073 | 0.005631 | 0.048478 | 1977 | - && Q2KIH4.1 RecName: Full=Ribosome biogenesis regulatory protein homolog && PF04176:TIP41-like family PF04939:Ribosome biogenesis regulatory protein (RRS1)                                            |
| Lachesis_group0__13_contigs__l.g11602 | 304.0094 | 115.7324 | 1.391233 | 0.005176 | 0.045732 | 2058 | - && - && PF05920:Homeobox KN domain                                                                                                                                                                     |
| Lachesis_group0__13_contigs__l.g11442 | 770.6117 | 294.9735 | 1.385282 | 0.000148 | 0.003425 | 1032 | - && Q8TG13.1 RecName: Full=Casein kinase II subunit alpha; Short=CK II subunit alpha && PF00069:Protein kinase domain                                                                                   |
| Lachesis_group0__13_contigs__l.g1615  | 565.9436 | 216.9291 | 1.383587 | 0.004682 | 0.042381 | 1779 | - && O42922.1 RecName: Full=Uncharacterized MFS-type transporter C16A3.17c && PF07690:Major Facilitator Superfamily                                                                                      |
| Lachesis_group0__13_contigs__l.g1329  | 181.9479 | 69.74071 | 1.382099 | 0.002624 | 0.027479 | 1680 | - && - && PF01728:FtsJ-like methyltransferase                                                                                                                                                            |
| Lachesis_group0__13_contigs__l.g9040  | 180.3119 | 69.64212 | 1.372959 | 0.003029 | 0.030686 | 1629 | - && - && PF13532:2OG-Fe(II) oxygenase superfamily                                                                                                                                                       |
| Lachesis_group0__13_contigs__l.g1503  | 2893.173 | 1119.137 | 1.370204 | 0.001342 | 0.016802 | 1323 | - && Q4PBZ9.2 RecName: Full=Non-histone chromosomal protein 6 && PF00505:HMG (high mobility group) box PF01975:Survival protein SurE                                                                     |
| Lachesis_group0__13_contigs__l.g7460  | 149.2647 | 57.63682 | 1.369767 | 0.004074 | 0.038526 | 597  | - && P0CR81.1 RecName: Full=Translation machinery-associated protein 22 >P0CR80.1                                                                                                                        |

|                                       |          |          |          |          |          |      |                                                                                                                                                                                                                                                                                                                                                                                                    |
|---------------------------------------|----------|----------|----------|----------|----------|------|----------------------------------------------------------------------------------------------------------------------------------------------------------------------------------------------------------------------------------------------------------------------------------------------------------------------------------------------------------------------------------------------------|
|                                       |          |          |          |          |          |      | RecName: Full=Translation machinery-associated protein 22 && PF01253:Translation initiation factor SUI1                                                                                                                                                                                                                                                                                            |
| Lachesis_group0__13_contigs__l.g11070 | 1913.763 | 742.9762 | 1.365129 | 0.00152  | 0.018476 | 3867 | - && Q5F418.1 RecName: Full=26S proteasome non-ATPase regulatory subunit 1; AltName: Full=26S proteasome regulatory subunit RPN2; AltName: Full=26S proteasome regulatory subunit S1 && PF02826:D-isomer specific 2-hydroxyacid dehydrogenase, NAD binding domain PF13646:HEAT repeats PF00389:D-isomer specific 2-hydroxyacid dehydrogenase, catalytic domain PF01851:Proteasome/cyclosome repeat |
| Lachesis_group0__13_contigs__l.g2112  | 1578.104 | 613.6116 | 1.363107 | 0.000327 | 0.006273 | 735  | - && - && PF11807:Domain of unknown function (DUF3328)                                                                                                                                                                                                                                                                                                                                             |
| Lachesis_group0__13_contigs__l.g6652  | 3785.219 | 1472.255 | 1.362322 | 0.000818 | 0.012111 | 3060 | - && O94609.1 RecName: Full=Ubiquitin-activating enzyme E1 1; AltName: Full=Poly(A)+ RNA transport protein 3 && PF16190:Ubiquitin-activating enzyme E1 FCCH domain PF10585:Ubiquitin-activating enzyme active site PF16191:Ubiquitin-activating enzyme E1 four-helix bundle PF09358:Ubiquitin fold domain PF00899:ThiF family                                                                      |
| Lachesis_group0__13_contigs__l.g4714  | 192.5955 | 74.84776 | 1.361698 | 0.002196 | 0.024011 | 1575 | - && Q86XW9.1 RecName: Full=Thioredoxin domain-containing protein 6; AltName: Full=Thioredoxin-like protein 2; Short=Txl-2 && PF00334:Nucleoside diphosphate kinase                                                                                                                                                                                                                                |

|                                       |          |          |          |          |          |      |                                                                                                                                                                            |
|---------------------------------------|----------|----------|----------|----------|----------|------|----------------------------------------------------------------------------------------------------------------------------------------------------------------------------|
| Lachesis_group0__13_contigs__l.g5273  | 1463.525 | 569.7597 | 1.361099 | 0.000653 | 0.010202 | 2817 | - && P73177.1 RecName: Full=Uncharacterized ribonuclease sll1290 && PF00773:RNB domain                                                                                     |
| Lachesis_group0__13_contigs__l.g9351  | 350.3431 | 136.765  | 1.358079 | 0.000582 | 0.009498 | 2529 | - && - && PF05622:HOOK protein                                                                                                                                             |
| Lachesis_group0__13_contigs__l.g6658  | 546.9104 | 213.6369 | 1.35624  | 0.001099 | 0.014667 | 795  | - && Q1MTR2.2 RecName: Full=RNA-binding protein with serine-rich domain 1 homolog && PF00076:RNA recognition motif. (a.k.a. RRM, RBD, or RNP domain)                       |
| Lachesis_group0__13_contigs__l.g10889 | 377.3457 | 147.6476 | 1.353731 | 0.001109 | 0.014755 | 939  | - && Q06143.1 RecName: Full=Mitochondrial dicarboxylate transporter; AltName: Full=DTP; AltName: Full=Dicarboxylate carrier 1 && PF00153:Mitochondrial carrier protein     |
| Lachesis_group0__13_contigs__l.g7955  | 254.8787 | 99.77412 | 1.352723 | 0.001434 | 0.017716 | 957  | - && P25416.2 RecName: Full=Protein qutG && PF00459:Inositol monophosphatase family                                                                                        |
| Lachesis_group0__13_contigs__l.g2037  | 882.2064 | 345.9438 | 1.350038 | 0.003783 | 0.036412 | 2976 | - && Q7S8R8.2 RecName: Full=26S proteasome regulatory subunit rpn-1 && -                                                                                                   |
| Lachesis_group0__13_contigs__l.g5552  | 4537.387 | 1784.324 | 1.346696 | 0.001672 | 0.019552 | 1521 | - && O94260.1 RecName: Full=Putative G3BP-like protein && PF02136:Nuclear transport factor 2 (NTF2) domain PF00076:RNA recognition motif. (a.k.a. RRM, RBD, or RNP domain) |
| Lachesis_group0__13_contigs__l.g6054  | 414.1983 | 163.4807 | 1.339564 | 0.001737 | 0.020194 | 1248 | - && O74480.1 RecName: Full=Uncharacterized protein C1840.07c; Flags: Precursor && PF00149:Calcineurin-like phosphoesterase                                                |
| Lachesis_group0__13_contigs__l.g9111  | 673.8232 | 266.1321 | 1.339502 | 0.002225 | 0.024194 | 891  | - && Q5ZIM5.1 RecName: Full=Methionine aminopeptidase 1; Short=MAP 1; Short=MetAP 1; AltName: Full=Peptidase M 1 && PF00557:Metallopeptidase family M24                    |

|                                       |          |          |          |          |          |      |                                                                                                                                                                                                                                                                                                     |
|---------------------------------------|----------|----------|----------|----------|----------|------|-----------------------------------------------------------------------------------------------------------------------------------------------------------------------------------------------------------------------------------------------------------------------------------------------------|
| Lachesis_group0__13_contigs__l.g10801 | 762.8114 | 301.5412 | 1.339186 | 0.00115  | 0.01511  | 903  | - && A5GFW7.1 RecName: Full=Protein RTF2 homolog; AltName: Full=Replication termination factor 2 domain-containing protein 1 && PF04641:Rtf2 RING-finger                                                                                                                                            |
| Lachesis_group0__13_contigs__l.g10617 | 815.7695 | 322.7339 | 1.337384 | 0.000443 | 0.007829 | 1941 | - && Q0CJV3.1 RecName: Full=Vacuolar protein sorting-associated protein 27 && PF01363:FYVE zinc finger PF03127:GAT domain PF00790:VHS domain                                                                                                                                                        |
| Lachesis_group0__13_contigs__l.g4614  | 968.1334 | 384.0392 | 1.333793 | 0.001157 | 0.015153 | 687  | - && Q8WUJ0.1 RecName: Full=Serine/threonine/tyrosine-interacting protein; AltName: Full=Protein tyrosine phosphatase-like protein && PF00782:Dual specificity phosphatase, catalytic domain                                                                                                        |
| Lachesis_group0__13_contigs__l.g11708 | 7303.999 | 2904.356 | 1.330513 | 0.001004 | 0.014013 | 4278 | - && Q9UUF7.1 RecName: Full=Coatomer subunit beta; AltName: Full=Beta-coat protein; Short=Beta-COP && PF07718:Coatomer beta C-terminal region PF02133:Permease for cytosine/purines, uracil, thiamine, allantoin PF14806:Coatomer beta subunit appendage platform PF01602:Adaptin N terminal region |
| Lachesis_group0__13_contigs__l.g8667  | 268.3843 | 106.812  | 1.329635 | 0.003375 | 0.033304 | 1887 | - && - && PF00096:Zinc finger, C2H2 type                                                                                                                                                                                                                                                            |
| Lachesis_group0__13_contigs__l.g975   | 380.5185 | 151.6778 | 1.327707 | 0.000626 | 0.009951 | 612  | - && Q64520.2 RecName: Full=Guanylate kinase; AltName: Full=GMP kinase && PF00625:Guanylate kinase                                                                                                                                                                                                  |
| Lachesis_group0__13_contigs__l.g5846  | 933.1547 | 372.512  | 1.325563 | 0.002686 | 0.027908 | 1311 | - && Q10234.1 RecName: Full=Probable 37S ribosomal protein S5, mitochondrial && PF00333:Ribosomal protein S5, N-terminal                                                                                                                                                                            |

|                                       |          |          |          |          |          |      |                                                                                                                                                                                                                                                                           |
|---------------------------------------|----------|----------|----------|----------|----------|------|---------------------------------------------------------------------------------------------------------------------------------------------------------------------------------------------------------------------------------------------------------------------------|
|                                       |          |          |          |          |          |      | domain PF03719:Ribosomal protein S5, C-terminal domain                                                                                                                                                                                                                    |
| Lachesis_group0__13_contigs__l.g7966  | 228.9384 | 91.26283 | 1.324725 | 0.004204 | 0.03936  | 2697 | - && Q13546.3 RecName: Full=Receptor-interacting serine/threonine-protein kinase 1; AltName: Full=Cell death protein RIP; AltName: Full=Receptor-interacting protein 1; Short=RIP-1; AltName: Full=Serine/threonine-protein kinase RIP && PF07714:Protein tyrosine kinase |
| Lachesis_group0__13_contigs__l.g10060 | 702.2947 | 281.2041 | 1.321401 | 0.001038 | 0.014228 | 720  | - && - && PF00240:Ubiquitin family PF02179:BAG domain                                                                                                                                                                                                                     |
| Lachesis_group0__13_contigs__l.g5017  | 266.9758 | 107.7871 | 1.308158 | 0.001261 | 0.01605  | 1770 | - && - && PF00566:Rab-GTPase-TBC domain                                                                                                                                                                                                                                   |
| Lachesis_group0__13_contigs__l.g3582  | 358.505  | 145.012  | 1.307942 | 0.003671 | 0.035498 | 777  | - && - && PF13489:Methyltransferase domain                                                                                                                                                                                                                                |
| Lachesis_group0__13_contigs__l.g3735  | 490.5714 | 198.4827 | 1.305592 | 0.000909 | 0.013149 | 1905 | - && Q9UNZ2.2 RecName: Full=NSFL1 cofactor p47; AltName: Full=UBX domain-containing protein 2C; AltName: Full=p97 cofactor p47 >Q5RBG3.1 RecName: Full=NSFL1 cofactor p47; AltName: Full=p97 cofactor p47 && PF00789:UBX domain PF08059:SEP domain                        |
| Lachesis_group0__13_contigs__l.g1502  | 3953.293 | 1601.988 | 1.303105 | 0.000721 | 0.010963 | 1191 | - && P0C199.1 RecName: Full=Protein KES1 && PF01237:Oxysterol-binding protein                                                                                                                                                                                             |
| Lachesis_group0__13_contigs__l.g4161  | 525.6766 | 213.8049 | 1.298987 | 0.003084 | 0.031055 | 1437 | - && Q4P4G8.1 RecName: Full=NKAP family protein UM04995 && PF06047:Ras-induced vulval development antagonist                                                                                                                                                              |
| Lachesis_group0__13_contigs__l.g6229  | 1085.568 | 441.3464 | 1.298865 | 0.000952 | 0.013515 | 3714 | - && O14306.2 RecName: Full=Probable inositol polyphosphate 5-phosphatase C9G1.10c &&                                                                                                                                                                                     |

|                                       |          |          |          |          |          |      |                                                                                                                                                                                                                                                                                                                                                                                                                                                                                                     |
|---------------------------------------|----------|----------|----------|----------|----------|------|-----------------------------------------------------------------------------------------------------------------------------------------------------------------------------------------------------------------------------------------------------------------------------------------------------------------------------------------------------------------------------------------------------------------------------------------------------------------------------------------------------|
|                                       |          |          |          |          |          |      | PF03372:Endonuclease/Exonuclease/phosphatase family                                                                                                                                                                                                                                                                                                                                                                                                                                                 |
| Lachesis_group0__13_contigs__l.g643   | 1414.386 | 575.4757 | 1.297659 | 0.00178  | 0.020516 | 1695 | - && - && PF12937:F-box-like                                                                                                                                                                                                                                                                                                                                                                                                                                                                        |
| Lachesis_group0__13_contigs__l.g3337  | 5435.765 | 2214.234 | 1.295717 | 0.004967 | 0.044415 | 1725 | - && - && PF00106:short chain dehydrogenase                                                                                                                                                                                                                                                                                                                                                                                                                                                         |
| Lachesis_group0__13_contigs__l.g9869  | 1155.675 | 471.6734 | 1.292822 | 0.001809 | 0.020764 | 771  | - && Q08954.1 RecName: Full=Smr domain-containing protein YPL199C && PF01713:Smr domain PF08590:Domain of unknown function (DUF1771)                                                                                                                                                                                                                                                                                                                                                                |
| Lachesis_group0__13_contigs__l.g10152 | 1438.91  | 588.9434 | 1.28893  | 0.001007 | 0.014013 | 1584 | - && Q9Y884.1 RecName: Full=MAP kinase kinase skh1/pek1 && PF00069:Protein kinase domain                                                                                                                                                                                                                                                                                                                                                                                                            |
| Lachesis_group0__13_contigs__l.g6744  | 812.6641 | 334.2516 | 1.282046 | 0.002552 | 0.026836 | 2769 | - && Q9UKV8.3 RecName: Full=Protein argonaute-2; Short=Argonaute2; Short=hAgo2; AltName: Full=Argonaute RISC catalytic component 2; AltName: Full=Eukaryotic translation initiation factor 2C 2; Short=eIF-2C 2; Short=eIF2C 2; AltName: Full=PAZ Piwi domain protein; Short=PPD; AltName: Full=Protein slicer && PF02171:Piwi domain PF16487:Mid domain of argonaute PF02170:PAZ domain PF08699:Argonaute linker 1 domain PF16488:Argonaute linker 2 domain PF16486:N-terminal domain of argonaute |
| Lachesis_group0__13_contigs__l.g1926  | 854.2577 | 351.5513 | 1.280559 | 0.00334  | 0.033127 | 1338 | - && A6H7B5.1 RecName: Full=COP9 signalosome complex subunit 3; Short=SGN3; Short=Signalosome subunit 3 && -                                                                                                                                                                                                                                                                                                                                                                                        |

|                                       |          |          |          |          |          |      |                                                                                                                                                                                                                                                                                                        |
|---------------------------------------|----------|----------|----------|----------|----------|------|--------------------------------------------------------------------------------------------------------------------------------------------------------------------------------------------------------------------------------------------------------------------------------------------------------|
| Lachesis_group0__13_contigs__l.g4543  | 771.1341 | 318.5828 | 1.275148 | 0.004076 | 0.038526 | 3582 | - && Q0CL79.2 RecName: Full=Cytokinesis protein sepH; AltName: Full=Serine/threonine-protein kinase sepH && PF00069:Protein kinase domain                                                                                                                                                              |
| Lachesis_group0__13_contigs__l.g9250  | 218.1452 | 90.08204 | 1.274211 | 0.004061 | 0.038446 | 1839 | - && O74927.2 RecName: Full=Methylenetetrahydrofolate reductase 2 && PF02219:Methylenetetrahydrofolate reductase                                                                                                                                                                                       |
| Lachesis_group0__13_contigs__l.g8958  | 399.91   | 165.313  | 1.273757 | 0.00231  | 0.024872 | 438  | - && P35129.1 RecName: Full=Ubiquitin-conjugating enzyme E2 2; AltName: Full=E2 ubiquitin-conjugating enzyme 2; AltName: Full=Lethal protein 70; AltName: Full=Ubiquitin carrier protein 2; AltName: Full=Ubiquitin-protein ligase 2 && PF00179:Ubiquitin-conjugating enzyme                           |
| Lachesis_group0__13_contigs__l.g11550 | 590.8525 | 244.5743 | 1.273188 | 0.000956 | 0.013546 | 1680 | - && O94303.3 RecName: Full=Imidazole glycerol phosphate synthase hisHF; Short=IGP synthase; Short=IGPS; Short=ImGP synthase; Includes: RecName: Full=Glutamine amidotransferase; Includes: RecName: Full=Cyclase && PF00117:Glutamine amidotransferase class-I PF00977:Histidine biosynthesis protein |
| Lachesis_group0__13_contigs__l.g283   | 365.3965 | 151.5107 | 1.271774 | 0.00252  | 0.026663 | 954  | - && Q5RFR8.1 RecName: Full=Coatomeer subunit epsilon; AltName: Full=Epsilon-coat protein; Short=Epsilon-COP && PF04733:Coatomeer epsilon subunit                                                                                                                                                      |
| Lachesis_group0__13_contigs__l.g243   | 2698.205 | 1119.136 | 1.269654 | 0.00038  | 0.007045 | 546  | - && P34737.1 RecName: Full=40S ribosomal protein S15; AltName: Full=S12 && PF00203:Ribosomal protein S19                                                                                                                                                                                              |



|                                       |          |          |          |          |          |      |                                                                                                                                                                                                             |
|---------------------------------------|----------|----------|----------|----------|----------|------|-------------------------------------------------------------------------------------------------------------------------------------------------------------------------------------------------------------|
| Lachesis_group0__13_contigs__l.g4735  | 1612.014 | 669.9327 | 1.266693 | 0.001018 | 0.014103 | 2649 | - && P25375.1 RecName: Full=Saccharolysin; AltName: Full=Oligopeptidase YSCD; AltName: Full=Protease D; AltName: Full=Proteinase yscD && PF01432:Peptidase family M3                                        |
| Lachesis_group0__13_contigs__l.g2428  | 2377.243 | 989.6377 | 1.264569 | 0.001511 | 0.018391 | 1437 | - && O23254.1 RecName: Full=Serine hydroxymethyltransferase 4; Short=AtSHMT4; AltName: Full=Glycine hydroxymethyltransferase 4; AltName: Full=Serine methylase 4 && PF00464:Serine hydroxymethyltransferase |
| Lachesis_group0__13_contigs__l.g2759  | 1062.599 | 443.094  | 1.262121 | 0.001244 | 0.015873 | 966  | - && Q9UUI8.1 RecName: Full=Uncharacterized transporter C22F8.04 && PF03151:Triose-phosphate Transporter family                                                                                             |
| Lachesis_group0__13_contigs__l.g5606  | 530.2103 | 221.9358 | 1.257213 | 0.00249  | 0.026401 | 375  | - && Q9VU02.1 RecName: Full=Probable small nuclear ribonucleoprotein Sm D1; Short=Sm-D1; AltName: Full=snRNP core protein D1 && PF01423:LSM domain                                                          |
| Lachesis_group0__13_contigs__l.g11075 | 2282.863 | 957.597  | 1.253547 | 0.000675 | 0.010459 | 1599 | - && G5EB89.1 RecName: Full=Importin subunit alpha; AltName: Full=Karyopherin alpha && PF16186:Atypical Arm repeat PF01749:Importin beta binding domain PF00514:Armadillo/beta-catenin-like repeat          |
| Lachesis_group0__13_contigs__l.g8074  | 498.032  | 209.1266 | 1.252498 | 0.002236 | 0.024194 | 684  | - && Q5RBL6.1 RecName: Full=Golgi SNAP receptor complex member 1; AltName: Full=28 kDa Golgi SNARE protein; AltName: Full=28 kDa cis-Golgi SNARE p28 && -                                                   |

|                                       |          |          |          |          |          |      |                                                                                                                                                                                                                                                                                                                                                                                       |
|---------------------------------------|----------|----------|----------|----------|----------|------|---------------------------------------------------------------------------------------------------------------------------------------------------------------------------------------------------------------------------------------------------------------------------------------------------------------------------------------------------------------------------------------|
| Lachesis_group0__13_contigs__l.g267   | 1048.426 | 440.4509 | 1.251318 | 0.002078 | 0.023061 | 1896 | - && P0C155.1 PUTATIVE PSEUDOGENE:<br>RecName: Full=Putative carboxypeptidase<br>YOL153C && PF07687:Peptidase dimerisation<br>domain PF01546:Peptidase family M20/M25/M40                                                                                                                                                                                                             |
| Lachesis_group0__13_contigs__l.g1371  | 3733.3   | 1571.141 | 1.248596 | 0.003703 | 0.035736 | 4026 | - && Q4PBP6.2 RecName: Full=Stress response<br>protein NST1 && PF13945:Salt tolerance down-<br>regulator                                                                                                                                                                                                                                                                              |
| Lachesis_group0__13_contigs__l.g819   | 351.3387 | 148.6066 | 1.241554 | 0.001771 | 0.020458 | 1524 | - && - && PF13923:Zinc finger, C3HC4 type (RING<br>finger)                                                                                                                                                                                                                                                                                                                            |
| Lachesis_group0__13_contigs__l.g11282 | 1880.715 | 797.7742 | 1.236981 | 0.000913 | 0.013161 | 1032 | - && B0CQN7.1 RecName: Full=NADH-cytochrome<br>b5 reductase 1; AltName: Full=Microsomal<br>cytochrome b reductase &&<br>PF00175:Oxidoreductase NAD-binding<br>domain PF00970:Oxidoreductase FAD-binding<br>domain                                                                                                                                                                     |
| Lachesis_group0__13_contigs__l.g9225  | 1295.699 | 554.746  | 1.223869 | 0.001683 | 0.019632 | 3231 | - && Q92900.2 RecName: Full=Regulator of<br>nonsense transcripts 1; AltName: Full=ATP-<br>dependent helicase RENT1; AltName:<br>Full=Nonsense mRNA reducing factor 1;<br>Short=NORF1; AltName: Full=Up-frameshift<br>suppressor 1 homolog; Short=hUpf1 &&<br>PF13086:AAA domain PF13087:AAA<br>domain PF13245:Part of AAA<br>domain PF09416:RNA helicase (UPF2 interacting<br>domain) |

|                                       |          |          |          |          |          |      |                                                                                                                                                                                                                            |
|---------------------------------------|----------|----------|----------|----------|----------|------|----------------------------------------------------------------------------------------------------------------------------------------------------------------------------------------------------------------------------|
| Lachesis_group0__13_contigs__l.g6447  | 620.4853 | 266.4594 | 1.220406 | 0.004925 | 0.044078 | 2241 | - && Q9P787.1 RecName: Full=ER membrane protein complex subunit 3 && PF01956:Integral membrane protein DUF106                                                                                                              |
| Lachesis_group0__13_contigs__l.g4870  | 303.5815 | 130.5318 | 1.218114 | 0.001581 | 0.0188   | 2730 | - && P78810.2 RecName: Full=Vacuolar transporter chaperone 4 && PF02656:Domain of unknown function (DUF202) PF09359:VTC domain PF03105:SPX domain                                                                          |
| Lachesis_group0__13_contigs__l.g1729  | 1622.328 | 699.6216 | 1.213715 | 0.004384 | 0.040594 | 2592 | - && O13864.1 RecName: Full=Importin subunit beta-1; AltName: Full=Importin-95; AltName: Full=Karyopherin subunit beta-1; AltName: Full=Karyopherin-95 && PF13513:HEAT-like repeat PF03810:Importin-beta N-terminal domain |
| Lachesis_group0__13_contigs__l.g4837  | 1126.668 | 486.8059 | 1.21046  | 0.002834 | 0.029231 | 2142 | - && Q8J0F9.1 RecName: Full=Deshydrogenase mlcG; AltName: Full=Compactin biosynthesis protein G; AltName: Full=Enoyl reductase && PF08240:Alcohol dehydrogenase GroES-like domain PF00107:Zinc-binding dehydrogenase       |
| Lachesis_group0__13_contigs__l.g5989  | 2009.944 | 871.3798 | 1.205967 | 0.002846 | 0.029313 | 2325 | - && P33277.1 RecName: Full=GTPase-activating protein; AltName: Full=Ras GTPase-activating protein && PF03836:RasGAP C-terminus PF00616:GTPase-activator protein for Ras-like GTPase                                       |
| Lachesis_group0__13_contigs__l.g10253 | 1127.619 | 489.5318 | 1.203945 | 0.002758 | 0.028512 | 3396 | - && O60111.2 RecName: Full=ABC1 family protein MCP2 homolog; Flags: Precursor && PF03109:ABC1 family PF00566:Rab-GTPase-TBC domain                                                                                        |

|                                      |          |          |          |          |          |      |                                                                                                                                                                                                                                                                                                                                                                                                   |
|--------------------------------------|----------|----------|----------|----------|----------|------|---------------------------------------------------------------------------------------------------------------------------------------------------------------------------------------------------------------------------------------------------------------------------------------------------------------------------------------------------------------------------------------------------|
| Lachesis_group0__13_contigs__l.g2150 | 1271.663 | 552.3269 | 1.203262 | 0.000673 | 0.010449 | 357  | - && Q8QG64.2 RecName: Full=RING-box protein 1; Short=Rbx1; AltName: Full=Hyperosmotic protein 21; Short=sHOP21 && PF12678:RING-H2 zinc finger                                                                                                                                                                                                                                                    |
| Lachesis_group0__13_contigs__l.g7293 | 1118.796 | 487.4431 | 1.198713 | 0.001196 | 0.01544  | 1956 | - && Q9USP8.2 RecName: Full=Isocitrate dehydrogenase [NAD] subunit 2, mitochondrial; AltName: Full=Isocitric dehydrogenase; AltName: Full=NAD(+)-specific ICDH; Flags: Precursor && PF03357:Snf7 PF00180:Isocitrate/isopropylmalate dehydrogenase                                                                                                                                                 |
| Lachesis_group0__13_contigs__l.g8560 | 3783.262 | 1650.196 | 1.197035 | 0.000607 | 0.009747 | 3309 | - && Q9UTT1.2 RecName: Full=Ubiquitin carboxyl-terminal hydrolase 21; AltName: Full=Deubiquitinating enzyme 21; AltName: Full=Ubiquitin thioesterase 21; AltName: Full=Ubiquitin-specific-processing protease 21 && PF14533:Ubiquitin-specific protease C-terminal PF00917:MATH domain PF12436:ICP0-binding domain of Ubiquitin-specific protease 7 PF00443:Ubiquitin carboxyl-terminal hydrolase |
| Lachesis_group0__13_contigs__l.g5380 | 667.7744 | 291.6421 | 1.195287 | 0.001934 | 0.021857 | 1911 | - && Q6PD26.3 RecName: Full=GPI transamidase component PIG-S; AltName: Full=Phosphatidylinositol-glycan biosynthesis class S protein && PF10510:Phosphatidylinositol-glycan biosynthesis class S protein                                                                                                                                                                                          |
| Lachesis_group0__13_contigs__l.g8559 | 1316.659 | 576.0912 | 1.192641 | 0.002937 | 0.030062 | 756  | - && Q9UUA4.1 RecName: Full=Translocation protein sec66 && PF09802:Preprotein translocase subunit Sec66                                                                                                                                                                                                                                                                                           |

|                                      |          |          |          |          |          |      |                                                                                                                                                                                                                                                                   |
|--------------------------------------|----------|----------|----------|----------|----------|------|-------------------------------------------------------------------------------------------------------------------------------------------------------------------------------------------------------------------------------------------------------------------|
| Lachesis_group0__13_contigs__l.g4149 | 1974.479 | 868.2063 | 1.185613 | 0.001541 | 0.018585 | 2370 | - && B0D0N9.1 RecName: Full=Protein SEY1 && PF05879:Root hair defective 3 GTP-binding protein (RHD3)                                                                                                                                                              |
| Lachesis_group0__13_contigs__l.g8591 | 434.3569 | 192.165  | 1.17691  | 0.002203 | 0.024034 | 2670 | - && A5PJS6.1 RecName: Full=Ubiquitin carboxyl-terminal hydrolase 10; AltName: Full=Deubiquitinating enzyme 10; AltName: Full=Ubiquitin thioesterase 10; AltName: Full=Ubiquitin-specific-processing protease 10 && PF00443:Ubiquitin carboxyl-terminal hydrolase |
| Lachesis_group0__13_contigs__l.g4700 | 1076.144 | 476.8591 | 1.174617 | 0.002032 | 0.022745 | 2991 | - && P87235.1 RecName: Full=DNA repair protein rhp42 && PF03835:Rad4 transglutaminase-like domain PF10405:Rad4 beta-hairpin domain 3 PF10404:Rad4 beta-hairpin domain 2 PF10403:Rad4 beta-hairpin domain 1 PF01841:Transglutaminase-like superfamily              |
| Lachesis_group0__13_contigs__l.g6928 | 715.7834 | 318.0189 | 1.170866 | 0.004442 | 0.040946 | 1590 | - && - && PF09816:RNA polymerase II transcription elongation factor                                                                                                                                                                                               |
| Lachesis_group0__13_contigs__l.g6045 | 4109.144 | 1828.733 | 1.168118 | 0.003797 | 0.036509 | 1113 | - && O42964.1 RecName: Full=Transcription factor iws1 && PF08711:TFIIS helical bundle-like domain                                                                                                                                                                 |
| Lachesis_group0__13_contigs__l.g5528 | 2563.612 | 1148.223 | 1.158982 | 0.001988 | 0.022348 | 2847 | - && Q4P9K4.1 RecName: Full=Protein transport protein SEC24 && PF04810:Sec23/Sec24 zinc finger PF00626:Gelsolin repeat PF04811:Sec23/Sec24 trunk domain PF00397:WW domain PF04815:Sec23/Sec24 helical                                                             |

|                                       |          |          |          |          |          |      |                                                                                                                                                                                                                                                                                                  |               |
|---------------------------------------|----------|----------|----------|----------|----------|------|--------------------------------------------------------------------------------------------------------------------------------------------------------------------------------------------------------------------------------------------------------------------------------------------------|---------------|
|                                       |          |          |          |          |          |      | domain PF08033:Sec23/Sec24 domain                                                                                                                                                                                                                                                                | beta-sandwich |
| Lachesis_group0__13_contigs__l.g10159 | 1362.408 | 611.7225 | 1.155196 | 0.001209 | 0.015529 | 1725 | - && B0D0T8.1 RecName: Full=Transcription activator of gluconeogenesis ERT1 && -                                                                                                                                                                                                                 |               |
| Lachesis_group0__13_contigs__l.g3581  | 3014.778 | 1353.819 | 1.155113 | 0.002993 | 0.030423 | 1341 | - && Q10142.1 RecName: Full=Inositol phosphorylceramide synthase catalytic subunit aur1; Short=IPC synthase catalytic subunit aur1; AltName: Full=Aureobasidin A resistance protein homolog; AltName: Full=Phosphatidylinositol:ceramide phosphoinositol transferase && PF14378:PAP2 superfamily |               |
| Lachesis_group0__13_contigs__l.g5202  | 1837.572 | 828.7136 | 1.148969 | 0.001976 | 0.022239 | 1689 | - && - && PF01435:Peptidase family M48                                                                                                                                                                                                                                                           |               |
| Lachesis_group0__13_contigs__l.g1509  | 5202.794 | 2352.072 | 1.145275 | 0.004127 | 0.038917 | 3957 | - && Q90YK3.1 RecName: Full=L-gulonolactone oxidase; Short=LGO; AltName: Full=L-gulonogamma-lactone oxidase; Short=GLO && PF04030:D-arabinono-1,4-lactone oxidase PF01565:FAD binding domain                                                                                                     |               |
| Lachesis_group0__13_contigs__l.g6034  | 1169.905 | 531.355  | 1.138446 | 0.00132  | 0.016625 | 1566 | - && B6H9U8.1 RecName: Full=Secondary metabolism regulator laeA; AltName: Full=Methyltransferase laeA; AltName: Full=Velvet complex subunit laeA && PF12847:Methyltransferase domain                                                                                                             |               |
| Lachesis_group0__13_contigs__l.g2245  | 1207.779 | 557.7968 | 1.114645 | 0.001672 | 0.019552 | 669  | - && Q08971.1 RecName: Full=Protein PBDC1 homolog && PF04669:Polysaccharide biosynthesis                                                                                                                                                                                                         |               |

|                                       |          |          |          |          |          |      |                                                                                                                                                                                                                                                                                                              |
|---------------------------------------|----------|----------|----------|----------|----------|------|--------------------------------------------------------------------------------------------------------------------------------------------------------------------------------------------------------------------------------------------------------------------------------------------------------------|
| Lachesis_group0__13_contigs__l.g8883  | 1237.069 | 572.4707 | 1.11161  | 0.005756 | 0.049281 | 1230 | - && P78774.3 RecName: Full=Actin-related protein 2/3 complex subunit 1; AltName: Full=Arp2/3 complex 41 kDa subunit; AltName: Full=p41-ARC && -                                                                                                                                                             |
| Lachesis_group0__13_contigs__l.g7917  | 262.4117 | 121.6686 | 1.109448 | 0.005453 | 0.047497 | 1338 | - && Q9HD43.3 RecName: Full=Receptor-type tyrosine-protein phosphatase H; Short=R-PTP-H; AltName: Full=Stomach cancer-associated protein tyrosine phosphatase 1; Short=SAP-1; AltName: Full=Transmembrane-type protein-tyrosine phosphatase type H; Flags: Precursor && PF00102:Protein-tyrosine phosphatase |
| Lachesis_group0__13_contigs__l.g11295 | 4014.522 | 1864.97  | 1.10614  | 0.002997 | 0.030423 | 2796 | - && P53125.1 RecName: Full=Imitation switch two complex protein 1 && PF02791:DDT domain PF10537:ATP-utilising chromatin assembly and remodelling N-terminal PF15614:WSTF, HB1, Itc1p, MBD9 motif 3                                                                                                          |
| Lachesis_group0__13_contigs__l.g6309  | 894.5195 | 415.7573 | 1.105682 | 0.005142 | 0.045514 | 1812 | - && Q6DRJ9.1 RecName: Full=Synembryn-B; AltName: Full=Protein Ric-8B; AltName: Full=Synembryn-like && PF10165:Guanine nucleotide exchange factor synembryn                                                                                                                                                  |
| Lachesis_group0__13_contigs__l.g3333  | 1806.021 | 840.1524 | 1.104182 | 0.001531 | 0.018561 | 303  | - && P55853.1 RecName: Full=Small ubiquitin-related modifier; Short=SUMO; AltName: Full=Ubiquitin-like protein SMT3; Flags: Precursor && PF11976:Ubiquitin-2 like Rad60 SUMO-like                                                                                                                            |

|                                       |          |          |          |          |          |      |                                                                                                                                                                                                                                                                                   |
|---------------------------------------|----------|----------|----------|----------|----------|------|-----------------------------------------------------------------------------------------------------------------------------------------------------------------------------------------------------------------------------------------------------------------------------------|
| Lachesis_group0__13_contigs__l.g5243  | 1414.263 | 659.0152 | 1.101334 | 0.003879 | 0.037065 | 1530 | - && P87035.1 RecName: Full=Guanine nucleotide-binding protein alpha-4 subunit && PF00503:G-protein alpha subunit                                                                                                                                                                 |
| Lachesis_group0__13_contigs__l.g1351  | 1033.81  | 485.6751 | 1.090396 | 0.004585 | 0.041747 | 2631 | - && Q5AP95.1 RecName: Full=Suppressor of ferric uptake 1 && PF08550:Fungal protein of unknown function (DUF1752) PF00320:GATA zinc finger                                                                                                                                        |
| Lachesis_group0__13_contigs__l.g572   | 1230.299 | 578.4405 | 1.089106 | 0.003653 | 0.035407 | 3960 | - && B2GUZ1.1 RecName: Full=Ubiquitin carboxyl-terminal hydrolase 4; AltName: Full=Deubiquitinating enzyme 4; AltName: Full=Ubiquitin thioesterase 4; AltName: Full=Ubiquitin-specific-processing protease 4 && PF06337:DUSP domain PF00443:Ubiquitin carboxyl-terminal hydrolase |
| Lachesis_group0__13_contigs__l.g10985 | 2248.148 | 1059.707 | 1.085257 | 0.004605 | 0.041858 | 603  | - && Q9P720.1 RecName: Full=60S ribosomal protein L16; AltName: Full=Cytoplasmic ribosomal protein 46 && PF00572:Ribosomal protein L13                                                                                                                                            |
| Lachesis_group0__13_contigs__l.g4547  | 351.7648 | 166.6885 | 1.07776  | 0.004683 | 0.042381 | 1866 | - && Q9HGM6.1 RecName: Full=Putative transporter C543.05c && PF00955:HCO3-transporter family                                                                                                                                                                                      |
| Lachesis_group0__13_contigs__l.g2549  | 824.9005 | 394.7509 | 1.063172 | 0.005467 | 0.047539 | 1923 | - && Q4IQ08.1 RecName: Full=GPI-anchored wall transfer protein 1 && PF06423:GWT1                                                                                                                                                                                                  |
| Lachesis_group0__13_contigs__l.g2710  | 1052.643 | 506.6699 | 1.054962 | 0.005502 | 0.047726 | 3306 | - && Q92540.2 RecName: Full=Protein SMG7; AltName: Full=EST1-like protein C; AltName: Full=SMG-7 homolog; Short=hSMG-7 && PF10373:Est1 DNA/RNA binding domain PF10374:Telomerase activating protein Est1                                                                          |



|                                      |          |          |          |          |          |      |                                                                                                                                                                       |
|--------------------------------------|----------|----------|----------|----------|----------|------|-----------------------------------------------------------------------------------------------------------------------------------------------------------------------|
| Lachesis_group0__13_contigs__l.g3188 | 1488.749 | 717.9258 | 1.052026 | 0.004851 | 0.043523 | 2589 | - && P46592.3 RecName: Full=Glycolipid 2-alpha-mannosyltransferase 2; AltName: Full=Alpha-1,2-mannosyltransferase 2 && PF01793:Glycolipid 2-alpha-mannosyltransferase |
| Lachesis_group0__13_contigs__l.g8738 | 957.2167 | 475.6837 | 1.008727 | 0.004049 | 0.03841  | 966  | - && Q5ZL33.2 RecName: Full=Serine-threonine kinase receptor-associated protein && PF00400:WD domain, G-beta repeat                                                   |
| Lachesis_group0__13_contigs__l.g5320 | 995.9752 | 496.0033 | 1.005453 | 0.005305 | 0.046398 | 1296 | - && P78712.2 RecName: Full=Actin-related protein 3; AltName: Full=Actin-like protein 3 && PF00022:Actin                                                              |
| Lachesis_group0__13_contigs__l.g4981 | 21738.64 | 45259.5  | -1.05796 | 0.0038   | 0.036509 | 4215 | - && Q7S4N5.2 RecName: Full=Metacaspase-1B; Flags: Precursor && PF00656:Caspase domain                                                                                |
| Lachesis_group0__13_contigs__l.g7325 | 1690.514 | 3525.364 | -1.06036 | 0.003413 | 0.033628 | 1116 | - && Q00319.1 RecName: Full=Peroxisomal membrane protein PMP47B && PF00153:Mitochondrial carrier protein                                                              |
| Lachesis_group0__13_contigs__l.g2842 | 1612.112 | 3369.659 | -1.06362 | 0.002232 | 0.024194 | 1167 | - && Q9Y7N4.1 RecName: Full=D-amino-acid oxidase; Short=DAAO; Short=DAMOX; Short=DAO && PF01266:FAD dependent oxidoreductase                                          |
| Lachesis_group0__13_contigs__l.g7876 | 816.9356 | 1722.522 | -1.07612 | 0.003464 | 0.033959 | 669  | - && - && PF15370:Domain of unknown function (DUF4598)                                                                                                                |
| Lachesis_group0__13_contigs__l.g5452 | 6292.551 | 13276.01 | -1.07711 | 0.00457  | 0.041747 | 1326 | - && - && PF03547:Membrane transport protein                                                                                                                          |
| Lachesis_group0__13_contigs__l.g1069 | 342.4022 | 750.8856 | -1.13268 | 0.004206 | 0.03936  | 2463 | - && O74402.1 RecName: Full=Heat shock protein 78, mitochondrial; Flags: Precursor && PF07724:AAA domain (Cdc48 subfamily) PF00004:ATPase family associated with      |

|                                       |          |          |          |          |          |      |                                                                                                                                                                                                                       |
|---------------------------------------|----------|----------|----------|----------|----------|------|-----------------------------------------------------------------------------------------------------------------------------------------------------------------------------------------------------------------------|
|                                       |          |          |          |          |          |      | various cellular activities (AAA) PF10431:C-terminal, D2-small domain, of ClpB protein                                                                                                                                |
| novel.736                             | 798.3081 | 1769.036 | -1.14782 | 0.004524 | 0.041555 | 7168 | - && P55080.1 RecName: Full=Microfibrillar-associated protein 1; AltName: Full=Associated microfibril protein; Short=AMF && PF06991:Microfibril-associated/Pre-mRNA processing                                        |
| Lachesis_group0__13_contigs__l.g6883  | 1311.283 | 2914.918 | -1.15237 | 0.003057 | 0.030879 | 3471 | - && P0CT24.1 RecName: Full=Glucosidase 2 subunit beta; AltName: Full=Alpha-glucosidase 2 subunit beta; Flags: Precursor && PF12999:Glucosidase II beta subunit-like PF13015:Glucosidase II beta subunit-like protein |
| Lachesis_group0__13_contigs__l.g11405 | 727.1338 | 1625.335 | -1.16065 | 0.004322 | 0.040123 | 906  | - && - && PF05705:Eukaryotic protein of unknown function (DUF829)                                                                                                                                                     |
| Lachesis_group0__13_contigs__l.g2805  | 233.9302 | 523.9479 | -1.16287 | 0.00265  | 0.027675 | 6588 | - && Q8VD65.3 RecName: Full=Phosphoinositide 3-kinase regulatory subunit 4; Short=PI3-kinase regulatory subunit 4 && PF00400:WD domain, G-beta repeat PF00069:Protein kinase domain                                   |
| Lachesis_group0__13_contigs__l.g7712  | 186.1449 | 418.1987 | -1.16787 | 0.003725 | 0.035917 | 852  | - && G4V4T7.1 RecName: Full=Enoyl-CoA hydratase && PF00378:Enoyl-CoA hydratase/isomerase                                                                                                                              |
| Lachesis_group0__13_contigs__l.g7264  | 1533.555 | 3452.655 | -1.17089 | 0.002157 | 0.023733 | 1572 | - && Q96HV5.1 RecName: Full=Transmembrane protein 41A; Flags: Precursor && PF09335:SNARE associated Golgi protein                                                                                                     |
| Lachesis_group0__13_contigs__l.g6863  | 1060.088 | 2405.487 | -1.18209 | 0.000951 | 0.013515 | 837  | - && - && PF00505:HMG (high mobility group) box                                                                                                                                                                       |

|                                       |          |          |          |          |          |      |                                                                                                                                                                                                                                                                                                                                                                                                                                                                                                                                       |
|---------------------------------------|----------|----------|----------|----------|----------|------|---------------------------------------------------------------------------------------------------------------------------------------------------------------------------------------------------------------------------------------------------------------------------------------------------------------------------------------------------------------------------------------------------------------------------------------------------------------------------------------------------------------------------------------|
| Lachesis_group0__13_contigs__l.g6591  | 688.0765 | 1561.637 | -1.18234 | 0.003057 | 0.030879 | 3840 | - && - && PF04937:Protein of unknown function (DUF 659) PF05615:Tho complex subunit 7 PF05699:hAT family C-terminal dimerisation region                                                                                                                                                                                                                                                                                                                                                                                               |
| Lachesis_group0__13_contigs__l.g11231 | 328.2643 | 746.8861 | -1.18636 | 0.004243 | 0.039585 | 9282 | - && Q07878.1 RecName: Full=Vacuolar protein sorting-associated protein 13; AltName: Full=Suppression of the onset of impotence protein 1; AltName: Full=Vacuolar protein-targeting protein 2 && PF09333:Autophagy-related protein C terminal domain PF06650:SHR-binding domain of vacuolar-sorting associated protein 13 PF12624:N-terminal region of Chorein or VPS13 PF16910:Repeating coiled region of VPS13 PF16909:Vacuolar-sorting-associated 13 protein C-terminal PF16908:Vacuolar sorting-associated protein 13, N-terminal |
| Lachesis_group0__13_contigs__l.g10514 | 121.4262 | 276.3476 | -1.18665 | 0.005572 | 0.048112 | 1143 | - && Q9HTE3.1 RecName: Full=Glutathione-independent formaldehyde dehydrogenase; Short=FALDH; Short=FDH && PF08240:Alcohol dehydrogenase GroES-like domain PF00107:Zinc-binding dehydrogenase                                                                                                                                                                                                                                                                                                                                          |
| Lachesis_group0__13_contigs__l.g458   | 251.5389 | 572.5149 | -1.18678 | 0.004329 | 0.040152 | 6915 | - && P9WQE7.1 RecName: Full=Phthiocerol synthesis polyketide synthase type I PpsA; AltName: Full=Beta-ketoacyl-acyl-carrier-protein synthase I && PF00698:Acyl transferase domain PF02801:Beta-ketoacyl synthase, C-terminal domain PF08659:KR                                                                                                                                                                                                                                                                                        |

|                                       |          |          |          |          |          |      |                                                                                                                                                                                                                                                                                            |
|---------------------------------------|----------|----------|----------|----------|----------|------|--------------------------------------------------------------------------------------------------------------------------------------------------------------------------------------------------------------------------------------------------------------------------------------------|
|                                       |          |          |          |          |          |      | domain PF07993:Male sterility<br>protein PF14765:Polyketide synthase<br>dehydratase PF00109:Beta-ketoacyl synthase, N-terminal domain                                                                                                                                                      |
| Lachesis_group0__13_contigs__l.g3882  | 416.8991 | 966.4423 | -1.21295 | 0.00244  | 0.025975 | 1389 | - && O15975.1 RecName: Full=Guanine nucleotide-binding protein G(q) subunit alpha; AltName: Full=Guanine nucleotide-binding protein alpha-q && PF00503:G-protein alpha subunit                                                                                                             |
| Lachesis_group0__13_contigs__l.g638   | 748.3945 | 1735.702 | -1.21365 | 0.002297 | 0.024758 | 1788 | - && - && PF15786:PET assembly of cytochrome c oxidase, mitochondrial                                                                                                                                                                                                                      |
| Lachesis_group0__13_contigs__l.g5913  | 133.9406 | 311.945  | -1.21977 | 0.004397 | 0.040677 | 1671 | - && Q0D076.1 RecName: Full=Probable mannosyl-oligosaccharide alpha-1,2-mannosidase 1B; AltName: Full=Class I alpha-mannosidase 1B; AltName: Full=Man(9)-alpha-mannosidase 1B; Flags: Precursor && PF01532:Glycosyl hydrolase family 47                                                    |
| Lachesis_group0__13_contigs__l.g8446  | 3192.53  | 7438.82  | -1.22042 | 0.002561 | 0.026905 | 4347 | - && Q09891.1 RecName: Full=Putative phospholipid-transporting ATPase C24B11.12c && PF12710:haloacid dehalogenase-like hydrolase PF16212:Phospholipid-translocating P-type ATPase C-terminal PF16209:Phospholipid-translocating ATPase N-terminal PF13246:Cation transport ATPase (P-type) |
| Lachesis_group0__13_contigs__l.g10137 | 752.0606 | 1753.537 | -1.22153 | 0.005642 | 0.0485   | 1158 | - && O13437.1 RecName: Full=Formate dehydrogenase; Short=FDH; AltName: Full=NAD-dependent formate dehydrogenase && PF00389:D-                                                                                                                                                              |

|                                      |          |          |          |          |          |      |                                                                                                                                                                                                                                                      |
|--------------------------------------|----------|----------|----------|----------|----------|------|------------------------------------------------------------------------------------------------------------------------------------------------------------------------------------------------------------------------------------------------------|
|                                      |          |          |          |          |          |      | isomer specific 2-hydroxyacid dehydrogenase, catalytic domain PF02826:D-isomer specific 2-hydroxyacid dehydrogenase, NAD binding domain                                                                                                              |
| Lachesis_group0__13_contigs__l.g8852 | 1076.344 | 2519.584 | -1.22719 | 0.002264 | 0.024453 | 1977 | - && Q8K194.1 RecName: Full=U4/U6.U5 small nuclear ribonucleoprotein 27 kDa protein; Short=U4/U6.U5 snRNP 27 kDa protein; Short=U4/U6.U5-27K; AltName: Full=U4/U6.U5 tri-snRNP-associated protein 3 && PF08648:Protein of unknown function (DUF1777) |
| Lachesis_group0__13_contigs__l.g5914 | 4489.463 | 10527.79 | -1.2296  | 0.001056 | 0.014359 | 3783 | - && Q5BGR2.2 RecName: Full=Protein mesA && PF07792:Docking domain of Afi1 for Arf3 in vesicle trafficking PF00656:Caspase domain                                                                                                                    |
| Lachesis_group0__13_contigs__l.g9741 | 296.4276 | 697.8437 | -1.23503 | 0.001072 | 0.014484 | 1923 | - && O34718.1 RecName: Full=Major myo-inositol transporter IolT && PF00083:Sugar (and other) transporter                                                                                                                                             |
| Lachesis_group0__13_contigs__l.g8095 | 103.9349 | 245.0645 | -1.23844 | 0.005291 | 0.046319 | 3261 | - && - && PF08596:Lethal giant larvae(Lgl) like, C-terminal                                                                                                                                                                                          |
| Lachesis_group0__13_contigs__l.g4691 | 1509.72  | 3570.262 | -1.24179 | 0.005689 | 0.048832 | 1806 | - && S0EEY7.1 RecName: Full=Efflux pump FUS6; AltName: Full=Fusarin biosynthesis protein 6 && PF07690:Major Facilitator Superfamily                                                                                                                  |
| Lachesis_group0__13_contigs__l.g2906 | 248.9748 | 589.7884 | -1.24416 | 0.004519 | 0.041555 | 1617 | - && P17549.1 RecName: Full=Benzoate 4-monooxygenase; AltName: Full=Benzoate-para-hydroxylase; Short=BpH; AltName: Full=Cytochrome P450 53 && PF00067:Cytochrome P450                                                                                |

|                                       |          |          |          |          |          |      |                                                                                                                                                                                                                                                                                     |
|---------------------------------------|----------|----------|----------|----------|----------|------|-------------------------------------------------------------------------------------------------------------------------------------------------------------------------------------------------------------------------------------------------------------------------------------|
| Lachesis_group0__13_contigs__l.g11653 | 187.5951 | 445.9684 | -1.24985 | 0.002695 | 0.027966 | 3237 | - && Q99385.1 RecName: Full=Vacuolar calcium ion transporter; AltName: Full=High copy number undoes manganese protein 1; AltName: Full=Manganese resistance 1 protein; AltName: Full=Vacuolar Ca(2+)/H(+) exchanger && PF02146:Sir2 family PF01699:Sodium/calcium exchanger protein |
| novel.1007                            | 1160.193 | 2786.709 | -1.26426 | 0.003322 | 0.033005 | 5725 | - && P65824.1 RecName: Full=Putative hydrolase Mb2248c; Flags: Precursor >P9WHR2.1 RecName: Full=Carboxylesterase A; Flags: Precursor >P9WHR3.1 RecName: Full=Carboxylesterase A; Flags: Precursor && -                                                                             |
| Lachesis_group0__13_contigs__l.g8262  | 240.0698 | 580.0059 | -1.27209 | 0.003139 | 0.031488 | 5529 | - && - && PF13191:AAA ATPase domain                                                                                                                                                                                                                                                 |
| Lachesis_group0__13_contigs__l.g5773  | 97.3698  | 235.3445 | -1.2741  | 0.002379 | 0.025527 | 2262 | - && Q7Z9M8.1 RecName: Full=Xyloglucanase; Short=XG; AltName: Full=Cel74a; Flags: Precursor && -                                                                                                                                                                                    |
| Lachesis_group0__13_contigs__l.g8350  | 401.318  | 971.7653 | -1.27584 | 0.000416 | 0.007501 | 3249 | - && O43122.1 RecName: Full=Hydrophobin-B; Flags: Precursor [Agaricus bisporus] && PF00106:short chain dehydrogenase PF01185:Fungal hydrophobin PF12697:Alpha/beta hydrolase family                                                                                                 |
| Lachesis_group0__13_contigs__l.g6108  | 127.3365 | 309.7441 | -1.28238 | 0.001097 | 0.014667 | 2496 | - && P55487.1 RecName: Full=Uncharacterized monooxygenase y4iD && PF13738:Pyridine nucleotide-disulphide oxidoreductase                                                                                                                                                             |

|                                      |          |          |          |          |          |      |                                                                                                                                                                                                                                                                                                                                  |
|--------------------------------------|----------|----------|----------|----------|----------|------|----------------------------------------------------------------------------------------------------------------------------------------------------------------------------------------------------------------------------------------------------------------------------------------------------------------------------------|
| Lachesis_group0__13_contigs__l.g2384 | 176.142  | 429.8537 | -1.28718 | 0.002942 | 0.030062 | 1905 | - && O31826.1 RecName: Full=Putative acyl-CoA synthetase YngI && PF13193:AMP-binding enzyme C-terminal domain PF00501:AMP-binding enzyme                                                                                                                                                                                         |
| Lachesis_group0__13_contigs__l.g8297 | 57.75286 | 141.394  | -1.29199 | 0.00569  | 0.048832 | 1128 | - && O14082.2 RecName: Full=Uncharacterized protein UNK4.17 && PF01408:Oxidoreductase family, NAD-binding Rossmann fold PF08635:Putative oxidoreductase C terminal                                                                                                                                                               |
| Lachesis_group0__13_contigs__l.g9826 | 161.2957 | 395.0779 | -1.29232 | 0.000946 | 0.013469 | 2910 | - && O00061.1 RecName: Full=Cytochrome P450 67; AltName: Full=CYPLXVII; AltName: Full=Planta-induced rust protein 16, partial [Uromyces viciae-fabae] && PF00067:Cytochrome P450                                                                                                                                                 |
| Lachesis_group0__13_contigs__l.g5303 | 148.3706 | 363.6807 | -1.29313 | 0.002016 | 0.022589 | 2649 | - && Q01373.1 RecName: Full=Peroxisomal hydratase-dehydrogenase-epimerase; Short=HDE; AltName: Full=Multifunctional beta-oxidation protein; Short=MFP; Includes: RecName: Full=2-enoyl-CoA hydratase; Includes: RecName: Full=(3R)-3-hydroxyacyl-CoA dehydrogenase && PF00106:short chain dehydrogenase PF01575:MaoC like domain |
| Lachesis_group0__13_contigs__l.g6679 | 391.8194 | 970.0999 | -1.30776 | 0.00094  | 0.013441 | 1143 | - && - && PF03227:Gamma interferon inducible lysosomal thiol reductase (GILT) PF09774:Caffeine-induced death protein 2                                                                                                                                                                                                           |
| Lachesis_group0__13_contigs__l.g8291 | 19422.83 | 48200.91 | -1.31131 | 0.000163 | 0.003649 | 5076 | - && Q0DV32.2 RecName: Full=4-coumarate--CoA ligase-like 1 && PF00501:AMP-binding enzyme PF00441:Acyl-CoA dehydrogenase, C-terminal domain PF02353:Mycolic acid                                                                                                                                                                  |

|                                       |          |          |          |          |          |      |                                                                                                                                                                                                                                                                                                     |
|---------------------------------------|----------|----------|----------|----------|----------|------|-----------------------------------------------------------------------------------------------------------------------------------------------------------------------------------------------------------------------------------------------------------------------------------------------------|
|                                       |          |          |          |          |          |      | cyclopropane synthetase PF02770:Acyl-CoA dehydrogenase, middle domain PF13193:AMP-binding enzyme C-terminal domain                                                                                                                                                                                  |
| Lachesis_group0__13_contigs__l.g2807  | 27296.84 | 68538.13 | -1.32817 | 0.000732 | 0.01108  | 570  | - && - && PF00011:Hsp20/alpha crystallin family                                                                                                                                                                                                                                                     |
| Lachesis_group0__13_contigs__l.g3340  | 177.9998 | 449.7558 | -1.33745 | 0.005213 | 0.045908 | 780  | - && - && PF00106:short chain dehydrogenase                                                                                                                                                                                                                                                         |
| Lachesis_group0__13_contigs__l.g932   | 329.4322 | 833.1672 | -1.33858 | 0.000997 | 0.013946 | 801  | - && - && PF13279:Thioesterase-like superfamily                                                                                                                                                                                                                                                     |
| Lachesis_group0__13_contigs__l.g11378 | 288.8268 | 731.5499 | -1.34049 | 0.003068 | 0.030927 | 1128 | - && - && PF01485:IBR domain, a half RING-finger domain                                                                                                                                                                                                                                             |
| Lachesis_group0__13_contigs__l.g9829  | 467.8157 | 1202.307 | -1.36169 | 0.000146 | 0.003375 | 1815 | - && Q08970.2 RecName: Full=Mitochondrial metal transporter 2; Flags: Precursor && PF01545:Cation efflux family                                                                                                                                                                                     |
| Lachesis_group0__13_contigs__l.g7505  | 209.2177 | 540.8106 | -1.37006 | 0.001637 | 0.019315 | 831  | - && - && PF00651:BTB/POZ domain                                                                                                                                                                                                                                                                    |
| Lachesis_group0__13_contigs__l.g4295  | 134.6192 | 348.8251 | -1.37316 | 0.002867 | 0.029464 | 1776 | - && B2SH83.1 RecName: Full=Dihydroxy-acid dehydratase; Short=DAD && PF00920:Dehydratase family                                                                                                                                                                                                     |
| Lachesis_group0__13_contigs__l.g11329 | 350.7165 | 908.6175 | -1.37343 | 0.001904 | 0.021634 | 1542 | - && P09437.2 RecName: Full=Cytochrome b2, mitochondrial; AltName: Full=L-lactate dehydrogenase [Cytochrome]; AltName: Full=L-lactate ferricytochrome C oxidoreductase; Short=L-LCR; Flags: Precursor && PF00173:Cytochrome b5-like Heme/Steroid binding domain PF01070:FMN-dependent dehydrogenase |
| Lachesis_group0__13_contigs__l.g590   | 2052.046 | 5323.512 | -1.37538 | 0.002067 | 0.022961 | 5571 | - && Q5B4Z3.2 RecName: Full=Cytokinesis protein sepH; AltName: Full=Serine/threonine-protein kinase sepH && PF00069:Protein kinase domain PF00307:Calponin homology (CH)                                                                                                                            |



|                                      |          |          |          |          |          |      |                                                                                                                                                                                                                                             |
|--------------------------------------|----------|----------|----------|----------|----------|------|---------------------------------------------------------------------------------------------------------------------------------------------------------------------------------------------------------------------------------------------|
|                                      |          |          |          |          |          |      | domain PF00130:Phorbol esters/diacylglycerol binding domain (C1 domain)                                                                                                                                                                     |
| Lachesis_group0__13_contigs__l.g677  | 154.5252 | 401.1377 | -1.37629 | 0.00115  | 0.01511  | 1878 | - && P15245.3 RecName: Full=Phenol 2-monooxygenase; AltName: Full=Phenol hydroxylase && PF07976:Phenol hydroxylase, C-terminal dimerisation domain PF01494:FAD binding domain                                                               |
| Lachesis_group0__13_contigs__l.g9474 | 136.205  | 353.8482 | -1.37821 | 0.004575 | 0.041747 | 1383 | - && B5XF11.1 RecName: Full=Lysine-specific demethylase 8; AltName: Full=JmjC domain-containing protein 5; AltName: Full=Jumonji domain-containing protein 5 [Salmo salar] && PF13621:Cupin-like domain                                     |
| Lachesis_group0__13_contigs__l.g9104 | 66.2972  | 172.9759 | -1.3832  | 0.00303  | 0.030686 | 2031 | - && - && PF12862:Anaphase-promoting complex subunit 5                                                                                                                                                                                      |
| Lachesis_group0__13_contigs__l.g4035 | 1159.525 | 3025.172 | -1.38348 | 0.001871 | 0.021331 | 2631 | - && Q9DCN1.1 RecName: Full=Peroxisomal NADH pyrophosphatase NUDT12; AltName: Full=Nucleoside diphosphate-linked moiety X motif 12; Short=Nudix motif 12 && PF00293:NUDIX domain PF09296:NADH pyrophosphatase-like rudimentary NUDIX domain |
| Lachesis_group0__13_contigs__l.g5954 | 420.0407 | 1096.135 | -1.38359 | 0.00018  | 0.003936 | 702  | - && Q6PAV8.1 RecName: Full=O-acetyl-ADP-ribose deacetylase MACROD2; AltName: Full=MACRO domain-containing protein 2; AltName: Full=[Protein ADP-ribosylglutamate] hydrolase && PF01661:Macro domain                                        |

|                                       |          |          |          |          |          |       |                                                                                                                                                                                                                                                                             |
|---------------------------------------|----------|----------|----------|----------|----------|-------|-----------------------------------------------------------------------------------------------------------------------------------------------------------------------------------------------------------------------------------------------------------------------------|
| Lachesis_group0__13_contigs__l.g7430  | 117.4483 | 306.5026 | -1.38462 | 0.003291 | 0.032763 | 1614  | - && Q9C0V8.1 RecName: Full=Uncharacterized transporter PB10D8.01 && PF07690:Major Facilitator Superfamily                                                                                                                                                                  |
| Lachesis_group0__13_contigs__l.g7442  | 179.569  | 473.4254 | -1.39945 | 0.00287  | 0.029469 | 1104  | - && Q148L6.1 RecName: Full=Trans-1,2-dihydrobenzene-1,2-diol dehydrogenase; AltName: Full=D-xylose 1-dehydrogenase; AltName: Full=D-xylose-NADP dehydrogenase; AltName: Full=Dimeric dihydrodiol dehydrogenase && PF01408:Oxidoreductase family, NAD-binding Rossmann fold |
| Lachesis_group0__13_contigs__l.g6553  | 317.1587 | 838.707  | -1.40308 | 0.000296 | 0.005823 | 10668 | - && P38811.1 RecName: Full=Transcription-associated protein 1; AltName: Full=p400 kDa component of SAGA && PF02259:FAT domain PF00454:Phosphatidylinositol 3- and 4-kinase                                                                                                 |
| Lachesis_group0__13_contigs__l.g2129  | 103.6643 | 273.934  | -1.40316 | 0.003374 | 0.033304 | 1668  | - && Q10286.1 RecName: Full=Myo-inositol transporter 1 && PF00083:Sugar (and other) transporter                                                                                                                                                                             |
| Lachesis_group0__13_contigs__l.g5603  | 121.6808 | 322.1497 | -1.40521 | 0.000603 | 0.009716 | 1152  | - && - && PF07818:HCNGP-like protein                                                                                                                                                                                                                                        |
| Lachesis_group0__13_contigs__l.g4892  | 502.3382 | 1335.928 | -1.41099 | 0.000563 | 0.009299 | 1104  | - && Q5ZID0.1 RecName: Full=NmrA-like family domain-containing protein 1 && PF05368:NmrA-like family                                                                                                                                                                        |
| Lachesis_group0__13_contigs__l.g10516 | 366.25   | 976.1422 | -1.41463 | 0.000578 | 0.009478 | 1605  | - && Q99252.1 RecName: Full=Protein ECM3; AltName: Full=Extracellular mutant protein 3 && -                                                                                                                                                                                 |
| Lachesis_group0__13_contigs__l.g489   | 202.2622 | 544.8562 | -1.42982 | 0.000254 | 0.005214 | 4179  | - && - && PF12937:F-box-like                                                                                                                                                                                                                                                |

|                                       |          |          |          |          |          |      |                                                                                                                                                                                                         |
|---------------------------------------|----------|----------|----------|----------|----------|------|---------------------------------------------------------------------------------------------------------------------------------------------------------------------------------------------------------|
| Lachesis_group0__13_contigs__l.g2006  | 129.5553 | 349.3409 | -1.43136 | 0.000549 | 0.009098 | 1635 | - && P08092.2 RecName: Full=Negative regulator of sexual conjugation and meiosis && PF00069:Protein kinase domain                                                                                       |
| Lachesis_group0__13_contigs__l.g3650  | 100.5589 | 271.7616 | -1.43415 | 0.000653 | 0.010202 | 1347 | - && A2QBQ3.1 RecName: Full=Probable endo-1,3(4)-beta-glucanase An02g00850; AltName: Full=Mixed-linked glucanase An02g00850; Flags: Precursor && PF00652:Ricin-type beta-trefoil lectin domain          |
| Lachesis_group0__13_contigs__l.g3651  | 284.1852 | 772.9146 | -1.44387 | 0.000342 | 0.006464 | 1317 | - && P75791.1 RecName: Full=Uncharacterized protein YbiU && PF07350:Protein of unknown function (DUF1479)                                                                                               |
| Lachesis_group0__13_contigs__l.g1318  | 3649.528 | 9939.102 | -1.44545 | 0.001701 | 0.019823 | 1995 | - && A2QEQ6.1 RecName: Full=Beta-glucuronidase; Short=GlcAase; AltName: Full=Beta-D-glucuronoside glucuronosohydrolase; Flags: Precursor && PF16862:Glycosyl hydrolase family 79 C-terminal beta domain |
| Lachesis_group0__13_contigs__l.g11123 | 34005.55 | 92687.56 | -1.4466  | 0.000149 | 0.003426 | 2772 | - && - && PF00564:PB1 domain                                                                                                                                                                            |
| Lachesis_group0__13_contigs__l.g1534  | 550.2828 | 1500.837 | -1.44767 | 0.00021  | 0.004454 | 5208 | - && Q9UUG9.1 RecName: Full=Tuberous sclerosis 2 protein homolog && PF03542:Tuberin PF02145:Rap/ran-GAP                                                                                                 |
| Lachesis_group0__13_contigs__l.g765   | 257.4852 | 702.7854 | -1.44889 | 0.004791 | 0.043207 | 1395 | - && P25390.2 RecName: Full=Serine/threonine-protein kinase SSK22; AltName: Full=MAP kinase kinase kinase SSK22; AltName: Full=Suppressor of sensor kinase 22 && PF07714:Protein tyrosine kinase        |
| Lachesis_group0__13_contigs__l.g11203 | 298.2343 | 814.7244 | -1.44958 | 0.001233 | 0.015777 | 681  | - && - && PF01975:Survival protein SurE                                                                                                                                                                 |
| Lachesis_group0__13_contigs__l.g8784  | 124.2454 | 339.8703 | -1.45229 | 0.001758 | 0.020358 | 4407 | - && - && PF05729:NACHT domain                                                                                                                                                                          |

|                                       |          |          |          |          |          |      |                                                                                                                                                                                                                                                                                                                |
|---------------------------------------|----------|----------|----------|----------|----------|------|----------------------------------------------------------------------------------------------------------------------------------------------------------------------------------------------------------------------------------------------------------------------------------------------------------------|
| Lachesis_group0__13_contigs__l.g6429  | 3878.048 | 10619.87 | -1.45338 | 0.00187  | 0.021331 | 1953 | - && O59714.1 RecName: Full=Uncharacterized membrane protein C3B8.06 && PF10348:Domain of unknown function (DUF2427) PF10355:Protein of unknown function (Ytp1)                                                                                                                                                |
| Lachesis_group0__13_contigs__l.g10550 | 159.7294 | 439.0623 | -1.45883 | 0.000184 | 0.004005 | 2910 | - && P29064.1 RecName: Full=Alpha-glucosidase; AltName: Full=Maltase; Contains: RecName: Full=Alpha-glucosidase subunit 1; Contains: RecName: Full=Alpha-glucosidase subunit 2; Flags: Precursor && PF16863:N-terminal barrel of NtMGAM and CtMGAM, maltase-glucoamylase PF01055:Glycosyl hydrolases family 31 |
| Lachesis_group0__13_contigs__l.g571   | 126.9846 | 351.6573 | -1.47042 | 0.001151 | 0.01511  | 1833 | - && O13902.1 RecName: Full=Dihydroxyacetone kinase 1; Short=DHA kinase 1; AltName: Full=Glycerone kinase 1; AltName: Full=Triokinase 1; AltName: Full=Triose kinase 1 && PF02734:DAK2 domain PF02733:Dak1 domain                                                                                              |
| Lachesis_group0__13_contigs__l.g678   | 1455.633 | 4056.315 | -1.47854 | 0.000125 | 0.003006 | 1725 | - && P15245.3 RecName: Full=Phenol 2-monooxygenase; AltName: Full=Phenol hydroxylase && PF07976:Phenol hydroxylase, C-terminal dimerisation domain PF01494:FAD binding domain                                                                                                                                  |
| Lachesis_group0__13_contigs__l.g409   | 10506.63 | 29531.23 | -1.49094 | 2.15E-05 | 0.000814 | 1188 | - && - && PF07992:Pyridine nucleotide-disulphide oxidoreductase                                                                                                                                                                                                                                                |
| Lachesis_group0__13_contigs__l.g9060  | 410.4988 | 1156.636 | -1.49458 | 0.000258 | 0.005273 | 1677 | - && P55809.1 RecName: Full=Succinyl-CoA:3-ketoacid coenzyme A transferase 1, mitochondrial;                                                                                                                                                                                                                   |

|                                       |          |          |          |          |          |      |                                                                                                                                                                                   |
|---------------------------------------|----------|----------|----------|----------|----------|------|-----------------------------------------------------------------------------------------------------------------------------------------------------------------------------------|
|                                       |          |          |          |          |          |      | AltName: Full=3-oxoacid CoA-transferase 1;<br>AltName: Full=Somatic-type succinyl-CoA:3-oxoacid CoA-transferase; Short=SCOT-s; Flags: Precursor && PF01144:Coenzyme A transferase |
| Lachesis_group0__13_contigs__l.g11709 | 2094.881 | 5923.524 | -1.49962 | 0.001757 | 0.020358 | 2859 | - && - && PF07217:Heterokaryon incompatibility protein Het-C                                                                                                                      |
| Lachesis_group0__13_contigs__l.g2843  | 7554.792 | 21383.19 | -1.50102 | 0.000477 | 0.008254 | 1518 | - && Q9URW6.1 RecName: Full=SH3 domain-containing protein PJ696.02 && PF04366:Las17-binding protein actin regulator PF00018:SH3 domain                                            |
| Lachesis_group0__13_contigs__l.g7258  | 3964.752 | 11227.68 | -1.50179 | 0.000164 | 0.003649 | 3924 | - && P53721.1 RecName: Full=Respiratory supercomplex factor 2, mitochondrial; AltName: Full=Altered inheritance of mitochondria protein 38 && -                                   |
| Lachesis_group0__13_contigs__l.g10877 | 884.0265 | 2509.528 | -1.50546 | 0.001534 | 0.018579 | 1512 | - && O13820.3 RecName: Full=Cytochrome P450 61; AltName: Full=C-22 sterol desaturase && PF00067:Cytochrome P450                                                                   |
| Lachesis_group0__13_contigs__l.g6467  | 573.8029 | 1630.045 | -1.50648 | 0.000608 | 0.009747 | 1848 | - && Q3KJ31.1 RecName: Full=Lipid A export ATP-binding/permease protein MsbA && PF00005:ABC transporter                                                                           |
| Lachesis_group0__13_contigs__l.g2911  | 409.5011 | 1167.121 | -1.5113  | 0.003665 | 0.035475 | 2112 | - && - && PF00010:Helix-loop-helix DNA-binding domain                                                                                                                             |
| Lachesis_group0__13_contigs__l.g9163  | 88.95591 | 254.1657 | -1.51519 | 0.001169 | 0.015186 | 4614 | - && - && PF02373:JmjC domain, hydroxylase                                                                                                                                        |
| Lachesis_group0__13_contigs__l.g1720  | 43.90479 | 125.4115 | -1.51604 | 0.002174 | 0.023896 | 885  | - && B8NM67.1 RecName: Full=Oxidase ustYa; AltName: Full=Ustiloxin B biosynthesis protein Ya                                                                                      |

|                                       |          |          |          |          |          |      |                                                                                                                                                                                                                                                                                                      |
|---------------------------------------|----------|----------|----------|----------|----------|------|------------------------------------------------------------------------------------------------------------------------------------------------------------------------------------------------------------------------------------------------------------------------------------------------------|
|                                       |          |          |          |          |          |      | && PF11807:Domain of unknown function (DUF3328)                                                                                                                                                                                                                                                      |
| Lachesis_group0__13_contigs__l.g11062 | 2374.503 | 6801.353 | -1.51824 | 0.001643 | 0.019357 | 2691 | - && - && PF13886:Domain of unknown function (DUF4203)                                                                                                                                                                                                                                               |
| Lachesis_group0__13_contigs__l.g5699  | 277.7588 | 796.9306 | -1.52024 | 0.00327  | 0.032585 | 1209 | - && Q7SDR1.1 RecName: Full=Endoglucanase gh5-1; AltName: Full=Cellulase gh5-1; AltName: Full=Endo-1,4-beta-glucanase gh5-1; Flags: Precursor && PF00734:Fungal cellulose binding domain PF00150:Cellulase (glycosyl hydrolase family 5)                                                             |
| Lachesis_group0__13_contigs__l.g2033  | 135.9752 | 390.1958 | -1.52164 | 0.001432 | 0.017716 | 5091 | - && Q9P7V2.1 RecName: Full=ATP-binding cassette transporter abc4; Short=ABC transporter abc4; AltName: Full=ATP-energized glutathione S-conjugate pump abc4; AltName: Full=Glutathione S-conjugate-transporting ATPase abc4 && PF00005:ABC transporter PF00664:ABC transporter transmembrane region |
| Lachesis_group0__13_contigs__l.g10091 | 392.1955 | 1126.249 | -1.52205 | 0.002291 | 0.024717 | 2415 | - && Q59KI0.1 RecName: Full=UTP--glucose-1-phosphate uridylyltransferase; AltName: Full=UDP-glucose pyrophosphorylase; Short=UDPGP; Short=UGPase && PF00106:short chain dehydrogenase PF01704:UTP--glucose-1-phosphate uridylyltransferase                                                           |
| Lachesis_group0__13_contigs__l.g9589  | 30.62713 | 88.11057 | -1.52233 | 0.003527 | 0.034359 | 819  | - && B5ZA76.1 RecName: Full=Peptidoglycan deacetylase; Short=PG deacetylase; AltName:                                                                                                                                                                                                                |

|                                       |          |          |          |          |          |      |                                                                                                                                                                                                                                                    |
|---------------------------------------|----------|----------|----------|----------|----------|------|----------------------------------------------------------------------------------------------------------------------------------------------------------------------------------------------------------------------------------------------------|
|                                       |          |          |          |          |          |      | Full=Acetylxylyl esterases && PF01522:Polysaccharide deacetylase                                                                                                                                                                                   |
| Lachesis_group0__13_contigs__l.g9971  | 798.929  | 2297.518 | -1.52399 | 0.003034 | 0.030705 | 1428 | - && - && PF03595:Voltage-dependent anion channel                                                                                                                                                                                                  |
| Lachesis_group0__13_contigs__l.g8439  | 1602.94  | 4618.67  | -1.52676 | 0.001841 | 0.021057 | 1104 | - && - && PF00134:Cyclin, N-terminal domain                                                                                                                                                                                                        |
| Lachesis_group0__13_contigs__l.g2385  | 60.44586 | 175.161  | -1.5354  | 0.001008 | 0.014013 | 1035 | - && Q4R0J7.1 RecName: Full=D-arabinitol dehydrogenase 1; AltName: Full=NADP-dependent D-arabitol dehydrogenase && PF16912:Glucose dehydrogenase C-terminus PF08240:Alcohol dehydrogenase GroES-like domain                                        |
| Lachesis_group0__13_contigs__l.g10169 | 31.32572 | 90.8491  | -1.53558 | 0.002391 | 0.025554 | 1794 | - && - && PF00646:F-box domain                                                                                                                                                                                                                     |
| Lachesis_group0__13_contigs__l.g6803  | 95.19066 | 276.4382 | -1.53777 | 0.00111  | 0.014755 | 933  | - && Q9JLZ3.1 RecName: Full=Methylglutaconyl-CoA hydratase, mitochondrial; AltName: Full=AU-specific RNA-binding enoyl-CoA hydratase; Short=AU-binding enoyl-CoA hydratase; Short=muAUH; Flags: Precursor && PF00378:Enoyl-CoA hydratase/isomerase |
| Lachesis_group0__13_contigs__l.g7261  | 37.94469 | 110.674  | -1.54438 | 0.002998 | 0.030423 | 1872 | - && - && PF01965:DJ-1/PfpI family                                                                                                                                                                                                                 |
| Lachesis_group0__13_contigs__l.g1377  | 164.3615 | 480.1402 | -1.54735 | 0.00049  | 0.00838  | 3651 | - && A0A0D1E9B9.1 RecName: Full=Spore development regulator umv1 && PF11754:Velvet factor                                                                                                                                                          |
| Lachesis_group0__13_contigs__l.g1998  | 60.40709 | 177.3273 | -1.55282 | 0.000595 | 0.00962  | 1698 | - && P08158.1 RecName: Full=Acetamidase && PF01425:Amidase                                                                                                                                                                                         |
| Lachesis_group0__13_contigs__l.g11040 | 592.2398 | 1738.084 | -1.553   | 0.001097 | 0.014667 | 2682 | - && Q9P7G8.1 RecName: Full=UPF0382 membrane protein C1782.12c; Flags: Precursor && PF04241:Protein of unknown function (DUF423)                                                                                                                   |

|                                       |          |          |          |          |          |      |                                                                                                                                                                                                                                                                                                                                                                                                                                        |
|---------------------------------------|----------|----------|----------|----------|----------|------|----------------------------------------------------------------------------------------------------------------------------------------------------------------------------------------------------------------------------------------------------------------------------------------------------------------------------------------------------------------------------------------------------------------------------------------|
| Lachesis_group0__13_contigs__l.g8748  | 133.4021 | 391.4588 | -1.55363 | 0.002381 | 0.025527 | 510  | - && - && PF08583:Cytochrome c oxidase biogenesis protein Cmc1 like                                                                                                                                                                                                                                                                                                                                                                    |
| Lachesis_group0__13_contigs__l.g10906 | 66.3884  | 195.4723 | -1.55623 | 0.001681 | 0.019631 | 867  | - && P25170.1 RecName: Full=Multifunctional tryptophan biosynthesis protein; Includes: RecName: Full=Anthranilate synthase component 2; Short=AS; AltName: Full=Anthranilate synthase, glutamine amidotransferase component; Includes: RecName: Full=Indole-3-glycerol phosphate synthase; Short=IGPS; Includes: RecName: Full=N-(5'-phosphoribosyl)anthranilate isomerase; Short=PRAI && PF00218:Indole-3-glycerol phosphate synthase |
| Lachesis_group0__13_contigs__l.g9385  | 464.4794 | 1366.658 | -1.55688 | 0.001607 | 0.019088 | 870  | - && P06632.3 RecName: Full=2,5-diketo-D-gluconic acid reductase A; Short=2,5-DKG reductase A; Short=2,5-DKGR A; Short=25DKGR-A; AltName: Full=AKR5C && PF00248:Aldo/keto reductase family                                                                                                                                                                                                                                             |
| Lachesis_group0__13_contigs__l.g4384  | 47.47793 | 139.8204 | -1.56086 | 0.003466 | 0.033959 | 1506 | - && Q4WAZ6.1 RecName: Full=Multifunctional cytochrome P450 monooxygenase af510; AltName: Full=Fumagillin bioynthesis cluster P450 monooxygenase; Short=Fma-P450 && PF00067:Cytochrome P450                                                                                                                                                                                                                                            |
| Lachesis_group0__13_contigs__l.g6900  | 1045.742 | 3095.836 | -1.56593 | 0.001317 | 0.01661  | 1515 | - && Q92407.1 RecName: Full=Glucokinase; AltName: Full=Glucose kinase; Short=GLK && PF00349:Hexokinase PF03727:Hexokinase                                                                                                                                                                                                                                                                                                              |



|                                       |          |          |          |          |          |      |                                                                                                                                                                                                                                                                                    |
|---------------------------------------|----------|----------|----------|----------|----------|------|------------------------------------------------------------------------------------------------------------------------------------------------------------------------------------------------------------------------------------------------------------------------------------|
| Lachesis_group0__13_contigs__l.g452   | 143.756  | 425.8493 | -1.56611 | 0.000953 | 0.013515 | 2142 | - && Q9UT59.1 RecName: Full=Putative uncharacterized oxidoreductase C513.07 && PF01370:NAD dependent epimerase/dehydratase family                                                                                                                                                  |
| Lachesis_group0__13_contigs__l.g5941  | 121.5189 | 361.0235 | -1.57052 | 0.000126 | 0.003012 | 1608 | - && Q4U3U4.1 RecName: Full=Quinate permease; AltName: Full=Quinate transporter && PF00083:Sugar (and other) transporter                                                                                                                                                           |
| Lachesis_group0__13_contigs__l.g10701 | 63.26335 | 188.3674 | -1.57577 | 0.001482 | 0.018102 | 2664 | - && Q09803.1 RecName: Full=Suppressor protein of bem1/bed5 double mutants && PF04212:MIT (microtubule interacting and transport) domain PF07714:Protein tyrosine kinase                                                                                                           |
| Lachesis_group0__13_contigs__l.g483   | 36.68808 | 109.6449 | -1.57663 | 0.005309 | 0.046398 | 1689 | - && - && PF12937:F-box-like                                                                                                                                                                                                                                                       |
| Lachesis_group0__13_contigs__l.g7481  | 1673.13  | 5006.1   | -1.58118 | 0.001391 | 0.017335 | 2475 | - && - && PF04082:Fungal specific transcription factor domain                                                                                                                                                                                                                      |
| Lachesis_group0__13_contigs__l.g5150  | 848.4803 | 2542.549 | -1.58323 | 0.000637 | 0.010051 | 2967 | - && P0CS23.1 RecName: Full=Urease; AltName: Full=Urea amidohydrolase >P0CS22.1 RecName: Full=Urease; AltName: Full=Urea amidohydrolase && PF00547:Urease, gamma subunit PF01979:Amidohydrolase family PF00449:Urease alpha-subunit, N-terminal domain PF00699:Urease beta subunit |
| Lachesis_group0__13_contigs__l.g1062  | 3239.096 | 9710.574 | -1.58398 | 5.81E-05 | 0.001715 | 4593 | - && P55201.2 RecName: Full=Peregrin; AltName: Full=Bromodomain and PHD finger-containing protein 1; AltName: Full=Protein Br140 && PF10513:Enhancer of polycomb-like PF13831:PHD-                                                                                                 |

|                                      |          |          |          |          |          |      |                                                                                                                                                                                                                                                                                                                                   |
|--------------------------------------|----------|----------|----------|----------|----------|------|-----------------------------------------------------------------------------------------------------------------------------------------------------------------------------------------------------------------------------------------------------------------------------------------------------------------------------------|
|                                      |          |          |          |          |          |      | finger PF00439:Bromodomain PF13832:PHD-zinc-finger like domain PF00855:PWWP domain                                                                                                                                                                                                                                                |
| Lachesis_group0__13_contigs__l.g108  | 418.9801 | 1257.22  | -1.58515 | 0.001906 | 0.021635 | 945  | - && - && PF04479:RTA1 like protein                                                                                                                                                                                                                                                                                               |
| Lachesis_group0__13_contigs__l.g3045 | 85.12486 | 255.6026 | -1.5859  | 0.000719 | 0.010959 | 975  | - && Q00023.1 RecName: Full=Cellulose-growth-specific protein; Flags: Precursor && PF03443:Glycosyl hydrolase family 61 PF00734:Fungal cellulose binding domain                                                                                                                                                                   |
| Lachesis_group0__13_contigs__l.g9100 | 50.67244 | 152.3849 | -1.58851 | 0.000546 | 0.00908  | 687  | - && Q00719.1 RecName: Full=O-methyltransferase MdmC && PF01596:O-methyltransferase                                                                                                                                                                                                                                               |
| Lachesis_group0__13_contigs__l.g3729 | 92.23263 | 277.1632 | -1.58855 | 0.0027   | 0.027975 | 1599 | - && O74969.1 RecName: Full=High-affinity glucose transporter ght2; AltName: Full=Hexose transporter 2 && PF00083:Sugar (and other) transporter                                                                                                                                                                                   |
| Lachesis_group0__13_contigs__l.g7355 | 289.1653 | 871.7863 | -1.59219 | 3.28E-05 | 0.001111 | 930  | - && - && PF00106:short chain dehydrogenase                                                                                                                                                                                                                                                                                       |
| Lachesis_group0__13_contigs__l.g7319 | 308.1243 | 933.2312 | -1.5987  | 0.00071  | 0.010846 | 1113 | - && P9WMU2.1 RecName: Full=Probable glycerophosphoryl diester phosphodiesterase 1; Short=Glycerophosphodiester phosphodiesterase 1 >P9WMU3.1 RecName: Full=Probable glycerophosphoryl diester phosphodiesterase 1; Short=Glycerophosphodiester phosphodiesterase 1 && PF03009:Glycerophosphoryl diester phosphodiesterase family |
| Lachesis_group0__13_contigs__l.g710  | 47.95216 | 145.2018 | -1.59989 | 0.004528 | 0.041556 | 2427 | - && - && PF00069:Protein kinase domain                                                                                                                                                                                                                                                                                           |
| Lachesis_group0__13_contigs__l.g3645 | 2511.129 | 7623.322 | -1.60214 | 0.004827 | 0.043412 | 423  | - && - && PF14200:Ricin-type beta-trefoil lectin domain-like                                                                                                                                                                                                                                                                      |
| Lachesis_group0__13_contigs__l.g5509 | 433.0234 | 1315.445 | -1.60306 | 0.001373 | 0.017153 | 1146 | - && P0DMQ6.1 RecName: Full=Sorbitol dehydrogenase; AltName: Full=L-idoitol 2-                                                                                                                                                                                                                                                    |

|                                       |          |          |          |          |          |      |                                                                                                                                                                                                                                                                                                                                                                                                                       |
|---------------------------------------|----------|----------|----------|----------|----------|------|-----------------------------------------------------------------------------------------------------------------------------------------------------------------------------------------------------------------------------------------------------------------------------------------------------------------------------------------------------------------------------------------------------------------------|
|                                       |          |          |          |          |          |      | dehydrogenase && PF08240:Alcohol dehydrogenase GroES-like domain PF00107:Zinc-binding dehydrogenase                                                                                                                                                                                                                                                                                                                   |
| Lachesis_group0__13_contigs__l.g11460 | 445.3839 | 1353.386 | -1.60319 | 2.50E-05 | 0.000914 | 651  | - && - && PF00385:Chromo (CHRromatin Organisation MODifier) domain                                                                                                                                                                                                                                                                                                                                                    |
| Lachesis_group0__13_contigs__l.g6053  | 1346.441 | 4093.93  | -1.60438 | 3.73E-05 | 0.001215 | 660  | - && P40581.1 RecName: Full=Peroxiredoxin HYR1; AltName: Full=Glutathione peroxidase 3; AltName: Full=Hydrogen peroxide resistance protein 1; AltName: Full=Oxidant receptor peroxidase 1; AltName: Full=Phospholipid hydroperoxide glutathione peroxidase 3; Short=PHGPx3 && PF00255:Glutathione peroxidase                                                                                                          |
| Lachesis_group0__13_contigs__l.g8747  | 179.7883 | 546.5731 | -1.60464 | 0.000817 | 0.012111 | 2403 | - && P31434.2 RecName: Full=Alpha-xylosidase && PF13802:Galactose mutarotase-like PF01055:Glycosyl hydrolases family 31                                                                                                                                                                                                                                                                                               |
| Lachesis_group0__13_contigs__l.g5843  | 204.464  | 623.3614 | -1.60829 | 0.005857 | 0.049934 | 1467 | - && Q4WCZ8.2 RecName: Full=Probable exopolygalacturonase X; Short=ExoPG; AltName: Full=Galacturan 1,4-alpha-galacturonidase; AltName: Full=Poly(1,4-alpha-D-galacturonide)galacturonohydrolase; Flags: Precursor >B0YDE8.2 RecName: Full=Probable exopolygalacturonase X; Short=ExoPG; AltName: Full=Galacturan 1,4-alpha-galacturonidase; AltName: Full=Poly(1,4-alpha-D-galacturonide)galacturonohydrolase; Flags: |

|                                       |          |          |          |          |          |      |                                                                                                                                                                                                                         |
|---------------------------------------|----------|----------|----------|----------|----------|------|-------------------------------------------------------------------------------------------------------------------------------------------------------------------------------------------------------------------------|
|                                       |          |          |          |          |          |      | Precursor && PF00295:Glycosyl hydrolases family 28                                                                                                                                                                      |
| Lachesis_group0__13_contigs__l.g3904  | 475.5136 | 1457.084 | -1.61541 | 0.001391 | 0.017335 | 2031 | - && - && PF00561:alpha/beta hydrolase fold                                                                                                                                                                             |
| Lachesis_group0__13_contigs__l.g4928  | 9836.645 | 30149.48 | -1.6159  | 0.000446 | 0.00787  | 4515 | - && Q9HDW7.1 RecName: Full=Calcium-transporting ATPase 2 && PF13246:Cation transport ATPase (P-type) PF00122:E1-E2 ATPase PF00690:Cation transporter/ATPase, N-terminus PF00689:Cation transporting ATPase, C-terminus |
| Lachesis_group0__13_contigs__l.g721   | 211.078  | 650.1902 | -1.62308 | 0.002367 | 0.025431 | 2298 | - && O22881.2 RecName: Full=Potassium transporter 2; Short=AtKT2; Short=AtKUP2; Short=AtPOT2 && PF02705:K+ potassium transporter                                                                                        |
| Lachesis_group0__13_contigs__l.g11148 | 155.9318 | 480.6618 | -1.62343 | 0.00163  | 0.019277 | 882  | - && Q6P8M1.1 RecName: Full=Putative deoxyribonuclease TATDN1 && PF01026:TatD related DNase                                                                                                                             |
| Lachesis_group0__13_contigs__l.g4565  | 47.51864 | 146.2261 | -1.62369 | 0.002675 | 0.027839 | 1416 | - && Q99252.1 RecName: Full=Protein ECM3; AltName: Full=Extracellular mutant protein 3 && PF03547:Membrane transport protein                                                                                            |
| Lachesis_group0__13_contigs__l.g10294 | 1425.021 | 4418.429 | -1.63264 | 6.89E-05 | 0.001975 | 699  | - && Q9UUM7.1 RecName: Full=Protein hob3; AltName: Full=Homolog of Bin3 && PF03114:BAR domain                                                                                                                           |
| Lachesis_group0__13_contigs__l.g11461 | 248.5167 | 771.4258 | -1.63464 | 0.000193 | 0.004167 | 2325 | - && Q9C168.2 RecName: Full=Catalase-1 && PF01965:DJ-1/PfpI family PF06628:Catalase-related immune-responsive PF00199:Catalase                                                                                          |
| Lachesis_group0__13_contigs__l.g107   | 689.0954 | 2141.833 | -1.63621 | 0.000356 | 0.00664  | 933  | - && - && PF04479:RTA1 like protein                                                                                                                                                                                     |

|                                       |          |          |          |          |          |      |                                                                                                                                                                                                                                                                                                                                        |
|---------------------------------------|----------|----------|----------|----------|----------|------|----------------------------------------------------------------------------------------------------------------------------------------------------------------------------------------------------------------------------------------------------------------------------------------------------------------------------------------|
| Lachesis_group0__13_contigs__l.g1568  | 38.75077 | 120.3385 | -1.63726 | 0.002505 | 0.026531 | 894  | - && - && PF08719:Domain of unknown function (DUF1768)                                                                                                                                                                                                                                                                                 |
| Lachesis_group0__13_contigs__l.g5830  | 87.70083 | 272.5914 | -1.63734 | 0.000325 | 0.006264 | 951  | - && Q3ZFI7.1 RecName: Full=D-galacturonate reductase; AltName: Full=D-galacturonic acid reductase && PF00248:Aldo/keto reductase family                                                                                                                                                                                               |
| Lachesis_group0__13_contigs__l.g10162 | 355.1364 | 1107.601 | -1.64104 | 0.002097 | 0.023151 | 2127 | - && Q752X0.5 RecName: Full=Peroxisomal targeting signal receptor; Short=PTS1 receptor; Short=PTS1R; AltName: Full=Peroxin-5 && PF13414:TPR repeat                                                                                                                                                                                     |
| Lachesis_group0__13_contigs__l.g2411  | 37.32295 | 116.2828 | -1.64165 | 0.0018   | 0.020697 | 2346 | - && P33363.2 RecName: Full=Periplasmic beta-glucosidase; AltName: Full=Beta-D-glucoside glucohydrolase; AltName: Full=Cellobiase; AltName: Full=Gentiobiase; Flags: Precursor && PF14310:Fibronectin type III-like domain PF01915:Glycosyl hydrolase family 3 C-terminal domain PF00933:Glycosyl hydrolase family 3 N terminal domain |
| Lachesis_group0__13_contigs__l.g8968  | 56.63703 | 177.0571 | -1.64299 | 0.000544 | 0.009077 | 1074 | - && Q96HA8.2 RecName: Full=Protein N-terminal glutamine amidohydrolase; AltName: Full=Protein NH2-terminal glutamine deamidase; Short=N-terminal Gln amidase; Short=Nt(Q)-amidase; AltName: Full=WDYHV motif-containing protein 1 && PF09764:N-terminal glutamine amidase                                                             |
| Lachesis_group0__13_contigs__l.g1354  | 31.98459 | 99.85778 | -1.64406 | 0.00134  | 0.016795 | 1632 | - && P39932.2 RecName: Full=Sugar transporter STL1 && PF00083:Sugar (and other) transporter                                                                                                                                                                                                                                            |

|                                       |          |          |          |          |          |      |                                                                                                                                                                                                                                                                    |
|---------------------------------------|----------|----------|----------|----------|----------|------|--------------------------------------------------------------------------------------------------------------------------------------------------------------------------------------------------------------------------------------------------------------------|
| Lachesis_group0__13_contigs__l.g3872  | 41.33538 | 129.8783 | -1.6511  | 0.000989 | 0.013859 | 2193 | - && Q54PX0.1 RecName: Full=Probable serine/threonine-protein kinase DDB_G0284251 && PF07714:Protein tyrosine kinase                                                                                                                                               |
| Lachesis_group0__13_contigs__l.g441   | 274.8579 | 864.4585 | -1.65371 | 0.0009   | 0.013072 | 507  | - && P56739.1 RecName: Full=Uncharacterized 21.2 kDa protein && PF08883:Dopa 4,5-dioxygenase family                                                                                                                                                                |
| Lachesis_group0__13_contigs__l.g4068  | 23.70291 | 74.62805 | -1.65711 | 0.005089 | 0.045129 | 885  | - && - && PF12695:Alpha/beta hydrolase family                                                                                                                                                                                                                      |
| Lachesis_group0__13_contigs__l.g2516  | 2131.866 | 6739.914 | -1.66062 | 0.00206  | 0.022937 | 2052 | - && P39992.1 RecName: Full=Uncharacterized protein YEL023C && PF09994:Uncharacterized alpha/beta hydrolase domain (DUF2235)                                                                                                                                       |
| Lachesis_group0__13_contigs__l.g10337 | 158.4774 | 502.1393 | -1.66417 | 0.000945 | 0.013469 | 555  | - && Q9UTI7.1 RecName: Full=Probable thymidylate synthase; Short=TS; Short=TSase && PF02441:Flavoprotein                                                                                                                                                           |
| Lachesis_group0__13_contigs__l.g568   | 17546.62 | 55701.99 | -1.66654 | 0.000105 | 0.002646 | 1626 | - && Q12300.1 RecName: Full=High-affinity glucose transporter RGT2 && PF00083:Sugar (and other) transporter                                                                                                                                                        |
| Lachesis_group0__13_contigs__l.g4102  | 1015.743 | 3257.284 | -1.68111 | 0.000617 | 0.009812 | 1629 | - && Q05567.1 RecName: Full=Sphingosine-1-phosphate lyase; Short=S1PL; Short=SP-lyase; Short=ySPL; AltName: Full=Bestowed of sphingosine tolerance 1; AltName: Full=Sphingosine-1-phosphate aldolase && PF00282:Pyridoxal-dependent decarboxylase conserved domain |
| Lachesis_group0__13_contigs__l.g3733  | 19753.4  | 63358.62 | -1.68145 | 3.45E-05 | 0.001146 | 3861 | - && O74969.1 RecName: Full=High-affinity glucose transporter ght2; AltName: Full=Hexose transporter 2 && PF00083:Sugar (and other) transporter                                                                                                                    |

|                                       |          |          |          |          |          |      |                                                                                                                                                                                            |
|---------------------------------------|----------|----------|----------|----------|----------|------|--------------------------------------------------------------------------------------------------------------------------------------------------------------------------------------------|
| Lachesis_group0__13_contigs__l.g2242  | 513.5323 | 1657.693 | -1.69082 | 8.76E-06 | 0.00039  | 4188 | - && O80327.1 RecName: Full=Thaumatococcus<br>protein 1; Flags: Precursor && PF00314:Thaumatococcus<br>family PF08386:TAP-like<br>protein PF00561:alpha/beta hydrolase fold                |
| Lachesis_group0__13_contigs__l.g2585  | 70.43915 | 227.3959 | -1.69251 | 0.000593 | 0.009616 | 1092 | - && Q7LL04.2 RecName: Full=UPF0676 protein<br>C1494.01 && PF03171:2OG-Fe(II) oxygenase<br>superfamily PF14226:non-haem dioxygenase in<br>morphine synthesis N-terminal                    |
| Lachesis_group0__13_contigs__l.g4906  | 17464.53 | 56478.88 | -1.69329 | 8.34E-05 | 0.002278 | 2271 | - && Q9P326.1 RecName: Full=Transcriptional<br>regulatory protein pro1; AltName: Full=Arrested<br>development protein 1 && PF11951:Fungal specific<br>transcription factor domain          |
| Lachesis_group0__13_contigs__l.g7732  | 62.98345 | 203.7426 | -1.69369 | 0.004524 | 0.041555 | 1740 | - && Q6BZP5.1 RecName: Full=2-methylisocitrate<br>lyase, mitochondrial; Flags: Precursor &&<br>PF00463:Isocitrate lyase family                                                             |
| Lachesis_group0__13_contigs__l.g3858  | 128.8694 | 418.4683 | -1.6991  | 0.002656 | 0.027712 | 1173 | - && - && PF01408:Oxidoreductase family, NAD-<br>binding Rossmann fold                                                                                                                     |
| Lachesis_group0__13_contigs__l.g11296 | 422.0943 | 1370.345 | -1.69915 | 7.82E-06 | 0.000358 | 1842 | - && - && PF01490:Transmembrane amino acid<br>transporter protein                                                                                                                          |
| Lachesis_group0__13_contigs__l.g11140 | 232.9138 | 756.7071 | -1.70004 | 1.14E-05 | 0.000481 | 2277 | - && - && PF02838:Glycosyl hydrolase family 20,<br>domain 2                                                                                                                                |
| Lachesis_group0__13_contigs__l.g4100  | 5784.685 | 18795.72 | -1.7001  | 0.000678 | 0.010476 | 2820 | - && Q09729.1 RecName: Full=Arrestin domain-<br>containing protein C31A2.12 && PF02752:Arrestin<br>(or S-antigen), C-terminal domain PF00339:Arrestin<br>(or S-antigen), N-terminal domain |

|                                       |          |          |          |          |          |      |                                                                                                                                                                                                                                     |
|---------------------------------------|----------|----------|----------|----------|----------|------|-------------------------------------------------------------------------------------------------------------------------------------------------------------------------------------------------------------------------------------|
| Lachesis_group0__13_contigs__l.g2214  | 30.18802 | 98.0456  | -1.70114 | 0.001117 | 0.014801 | 1140 | - && Q01752.1 RecName: Full=Aryl-alcohol dehydrogenase [NADP(+)]; Short=AAD && PF00248:Aldo/keto reductase family                                                                                                                   |
| Lachesis_group0__13_contigs__l.g3145  | 657.8777 | 2139.997 | -1.70177 | 0.001012 | 0.014054 | 1869 | - && A1CPX0.1 RecName: Full=Probable quinate permease; AltName: Full=Quinate transporter && PF00083:Sugar (and other) transporter                                                                                                   |
| Lachesis_group0__13_contigs__l.g2888  | 452.0916 | 1470.869 | -1.70193 | 0.000492 | 0.008383 | 3771 | - && P0CU32.1 RecName: Full=FAD-linked oxidoreductase CHGG_01242-2; AltName: Full=Chaetoglobosin biosynthesis protein CHGG_01242-2 && PF08031:Berberine and berberine like PF01565:FAD binding domain PF00069:Protein kinase domain |
| Lachesis_group0__13_contigs__l.g11052 | 7232.596 | 23585.67 | -1.70532 | 0.003219 | 0.032142 | 1653 | - && A0A0B5EMG9.1 RecName: Full=Efflux pump FUBT; AltName: Full=Fusaric acid biosynthesis protein T; AltName: Full=Fusaric acid transporter && PF07690:Major Facilitator Superfamily                                                |
| Lachesis_group0__13_contigs__l.g2503  | 78.79596 | 257.9876 | -1.70985 | 0.000457 | 0.007993 | 969  | - && P84675.2 RecName: Full=Putative fungistatic metabolite && PF01822:WSC domain                                                                                                                                                   |
| Lachesis_group0__13_contigs__l.g8405  | 377.8218 | 1237.639 | -1.71183 | 0.000129 | 0.003059 | 3213 | - && O14283.2 RecName: Full=Transcription factor prr1; AltName: Full=Pombe response regulator 1 && PF00447:HSF-type DNA-binding                                                                                                     |
| Lachesis_group0__13_contigs__l.g4708  | 1494.953 | 4897.712 | -1.71201 | 0.00281  | 0.029023 | 1944 | - && Q00614.1 RecName: Full=Carnitine O-acetyltransferase, mitochondrial; Short=Carnitine acetylase; Flags: Precursor && PF00755:Choline/Carnitine o-acyltransferase                                                                |



|                                       |          |          |          |          |          |      |                                                                                                                                                                                                                                                                                                                                                                                                                                |
|---------------------------------------|----------|----------|----------|----------|----------|------|--------------------------------------------------------------------------------------------------------------------------------------------------------------------------------------------------------------------------------------------------------------------------------------------------------------------------------------------------------------------------------------------------------------------------------|
| Lachesis_group0__13_contigs__l.g5321  | 555.1522 | 1823.231 | -1.71561 | 0.005191 | 0.04582  | 651  | - && P42769.1 RecName: Full=Glutathione S-transferase PM239X14; AltName: Full=GST class-phi && PF02798:Glutathione S-transferase, N-terminal domain PF00043:Glutathione S-transferase, C-terminal domain                                                                                                                                                                                                                       |
| Lachesis_group0__13_contigs__l.g8408  | 710.8845 | 2347.556 | -1.72365 | 0.000171 | 0.00378  | 1881 | - && O14283.2 RecName: Full=Transcription factor prr1; AltName: Full=Pombe response regulator 1 && PF00447:HSF-type DNA-binding                                                                                                                                                                                                                                                                                                |
| Lachesis_group0__13_contigs__l.g1999  | 47.15154 | 156.2177 | -1.72976 | 0.000669 | 0.010411 | 888  | - && Q49WS9.1 RecName: Full=Uncharacterized oxidoreductase SSP1627 && PF00106:short chain dehydrogenase                                                                                                                                                                                                                                                                                                                        |
| Lachesis_group0__13_contigs__l.g3866  | 68.34416 | 226.863  | -1.73019 | 0.000705 | 0.010807 | 2367 | - && P80235.2 RecName: Full=Putative mitochondrial carnitine O-acetyltransferase && PF00755:Choline/Carnitine o-acyltransferase                                                                                                                                                                                                                                                                                                |
| Lachesis_group0__13_contigs__l.g10260 | 60.36147 | 200.6676 | -1.73207 | 0.000935 | 0.013408 | 2925 | - && Q804S5.1 RecName: Full=E3 ubiquitin-protein ligase mib1; AltName: Full=Protein mind bomb && PF00569:Zinc finger, ZZ type                                                                                                                                                                                                                                                                                                  |
| Lachesis_group0__13_contigs__l.g8349  | 165.5696 | 550.3808 | -1.73353 | 0.000421 | 0.00756  | 756  | - && P0A2C9.1 RecName: Full=3-oxoacyl-[acyl-carrier-protein] reductase FabG; AltName: Full=3-ketoacyl-acyl carrier protein reductase; AltName: Full=Beta-Ketoacyl-acyl carrier protein reductase; AltName: Full=Beta-ketoacyl-ACP reductase >P0A2D0.1 RecName: Full=3-oxoacyl-[acyl-carrier-protein] reductase FabG; AltName: Full=3-ketoacyl-acyl carrier protein reductase; AltName: Full=Beta-Ketoacyl-acyl carrier protein |

|                                       |          |          |          |          |          |      |                                                                                                                                                                                                |
|---------------------------------------|----------|----------|----------|----------|----------|------|------------------------------------------------------------------------------------------------------------------------------------------------------------------------------------------------|
|                                       |          |          |          |          |          |      | reductase; AltName: Full=Beta-ketoacyl-ACP reductase && PF00106:short chain dehydrogenase                                                                                                      |
| Lachesis_group0__13_contigs__l.g8721  | 4507.041 | 15004.46 | -1.73515 | 0.000119 | 0.002909 | 1617 | - && P25390.2 RecName: Full=Serine/threonine-protein kinase SSK22; AltName: Full=MAP kinase kinase kinase SSK22; AltName: Full=Suppressor of sensor kinase 22 && PF00069:Protein kinase domain |
| Lachesis_group0__13_contigs__l.g6781  | 628.8986 | 2093.997 | -1.73542 | 0.000462 | 0.008023 | 1869 | - && P30608.1 RecName: Full=Cytochrome P450 52A6; AltName: Full=Alkane-inducible P450-ALK3; AltName: Full=CYP11A6 && PF00067:Cytochrome P450                                                   |
| Lachesis_group0__13_contigs__l.g10940 | 78.82481 | 262.4524 | -1.73676 | 0.000353 | 0.006619 | 1410 | - && - && PF03009:Glycerophosphoryl diester phosphodiesterase family                                                                                                                           |
| Lachesis_group0__13_contigs__l.g8668  | 1102.298 | 3675.648 | -1.73751 | 0.001815 | 0.020802 | 1032 | - && Q43139.2 RecName: Full=Fructose-1,6-bisphosphatase, cytosolic; Short=FBPase; AltName: Full=D-fructose-1,6-bisphosphate 1-phosphohydrolase && PF00316:Fructose-1-6-bisphosphatase          |
| Lachesis_group0__13_contigs__l.g10448 | 2662.432 | 8912.091 | -1.74303 | 4.47E-05 | 0.001411 | 2994 | - && Q9PFB0.1 RecName: Full=Beta-lactamase hydrolase-like protein; Short=BLH && PF00753:Metallo-beta-lactamase superfamily                                                                     |
| Lachesis_group0__13_contigs__l.g4081  | 68.44595 | 230.314  | -1.75089 | 0.00218  | 0.023934 | 1920 | - && Q20YI1.1 RecName: Full=Homoserine O-acetyltransferase; AltName: Full=Homoserine O-trans-acetylase; Short=HTA; Short=Homoserine transacetylase && PF00561:alpha/beta hydrolase fold        |

|                                      |          |          |          |          |          |      |                                                                                                                                                                                                                                                                                                                                                                         |
|--------------------------------------|----------|----------|----------|----------|----------|------|-------------------------------------------------------------------------------------------------------------------------------------------------------------------------------------------------------------------------------------------------------------------------------------------------------------------------------------------------------------------------|
| Lachesis_group0__13_contigs__l.g275  | 161.3471 | 543.352  | -1.75104 | 0.00061  | 0.009749 | 2625 | - && - && PF17107:N-terminal domain on NACHT_NTPase and P-loop NTPases                                                                                                                                                                                                                                                                                                  |
| Lachesis_group0__13_contigs__l.g6118 | 130.5967 | 439.8999 | -1.75216 | 0.000167 | 0.003697 | 2061 | - && A1CFL2.1 RecName: Full=Dehydrogenase patE; AltName: Full=Patulin synthesis protein E; Flags: Precursor && PF05199:GMC oxidoreductase PF00732:GMC oxidoreductase                                                                                                                                                                                                    |
| Lachesis_group0__13_contigs__l.g7226 | 237.1101 | 801.2279 | -1.75683 | 0.00063  | 0.009973 | 678  | - && - && PF01965:DJ-1/PfpI family                                                                                                                                                                                                                                                                                                                                      |
| Lachesis_group0__13_contigs__l.g4634 | 3939.51  | 13340.77 | -1.75975 | 1.61E-05 | 0.000645 | 1077 | - && Q8NKE2.2 RecName: Full=Alternative oxidase, mitochondrial; Flags: Precursor && PF01786:Alternative oxidase                                                                                                                                                                                                                                                         |
| Lachesis_group0__13_contigs__l.g7745 | 405.0382 | 1374.413 | -1.76283 | 0.001056 | 0.014359 | 3006 | - && - && PF12937:F-box-like                                                                                                                                                                                                                                                                                                                                            |
| Lachesis_group0__13_contigs__l.g6944 | 111.0269 | 377.8014 | -1.76696 | 0.000405 | 0.007346 | 1722 | - && P08157.2 RecName: Full=Aldehyde dehydrogenase; Short=ALDDH; Short=ALDH && PF00171:Aldehyde dehydrogenase family                                                                                                                                                                                                                                                    |
| Lachesis_group0__13_contigs__l.g370  | 405.0775 | 1380.367 | -1.76916 | 0.001174 | 0.015188 | 1896 | - && Q0CJ61.1 RecName: Full=Efflux pump atB; AltName: Full=Terreic acid biosynthesis cluster protein B && PF07690:Major Facilitator Superfamily                                                                                                                                                                                                                         |
| Lachesis_group0__13_contigs__l.g1572 | 124.5246 | 427.9008 | -1.78141 | 0.000589 | 0.009565 | 1032 | - && Q9Y6F1.3 RecName: Full=Poly [ADP-ribose] polymerase 3; Short=PARP-3; Short=hPARP-3; AltName: Full=ADP-ribosyltransferase diphtheria toxin-like 3; Short=ARTD3; AltName: Full=IRT1; AltName: Full=NAD(+) ADP-ribosyltransferase 3; Short=ADPRT-3; AltName: Full=Poly[ADP-ribose] synthase 3; Short=pADPRT-3 && PF00644:Poly(ADP-ribose) polymerase catalytic domain |

|                                       |          |          |          |          |          |      |                                                                                                                                                                                                                                                  |
|---------------------------------------|----------|----------|----------|----------|----------|------|--------------------------------------------------------------------------------------------------------------------------------------------------------------------------------------------------------------------------------------------------|
| Lachesis_group0__13_contigs__l.g10730 | 86.09449 | 296.0522 | -1.78269 | 0.000224 | 0.004712 | 2748 | - && Q2U4L7.2 RecName: Full=Glutaminase A; Flags: Precursor && PF08760:Domain of unknown function (DUF1793) PF16335:Domain of unknown function (DUF4965)                                                                                         |
| Lachesis_group0__13_contigs__l.g9068  | 8196.162 | 28316.24 | -1.7886  | 0.005538 | 0.047919 | 1962 | - && Q01877.1 RecName: Full=Heat shock protein HSS1 && PF00012:Hsp70 protein PF10712:NAD-specific glutamate dehydrogenase                                                                                                                        |
| Lachesis_group0__13_contigs__l.g2246  | 2299.746 | 7946.352 | -1.78881 | 0.000164 | 0.003649 | 1671 | - && P9WGQ4.1 RecName: Full=Uncharacterized oxidoreductase MT0954 >P9WGQ5.1 RecName: Full=Uncharacterized oxidoreductase Rv0927c && PF13561:Enoyl-(Acyl carrier protein) reductase PF00106:short chain dehydrogenase PF01596:O-methyltransferase |
| Lachesis_group0__13_contigs__l.g5114  | 32.18667 | 111.2549 | -1.78995 | 0.000706 | 0.010808 | 1635 | - && Q9P6J5.1 RecName: Full=Uncharacterized permease C1683.05 && PF02133:Permease for cytosine/purines, uracil, thiamine, allantoin                                                                                                              |
| Lachesis_group0__13_contigs__l.g3641  | 32.93783 | 114.1426 | -1.7959  | 0.000638 | 0.010051 | 2061 | - && - && PF00069:Protein kinase domain                                                                                                                                                                                                          |
| Lachesis_group0__13_contigs__l.g8522  | 22.17835 | 77.26104 | -1.80223 | 0.004282 | 0.039859 | 1161 | - && - && PF13926:Domain of unknown function (DUF4211)                                                                                                                                                                                           |
| Lachesis_group0__13_contigs__l.g3103  | 189.7891 | 662.7602 | -1.80366 | 9.03E-05 | 0.002408 | 3453 | - && Q9Y6Z9.1 RecName: Full=Sorbose reductase sou1; AltName: Full=Sorbitol utilization protein sou1 && PF00106:short chain dehydrogenase                                                                                                         |
| Lachesis_group0__13_contigs__l.g9495  | 2639.816 | 9216.351 | -1.80382 | 0.000251 | 0.005176 | 738  | - && - && PF00646:F-box domain                                                                                                                                                                                                                   |
| Lachesis_group0__13_contigs__l.g8618  | 30.21117 | 105.6307 | -1.8086  | 0.000749 | 0.011265 | 1419 | - && P49374.1 RecName: Full=High-affinity glucose transporter && PF00083:Sugar (and other) transporter                                                                                                                                           |

|                                       |          |          |          |          |          |      |                                                                                                                                                                                                                                                                                                                           |
|---------------------------------------|----------|----------|----------|----------|----------|------|---------------------------------------------------------------------------------------------------------------------------------------------------------------------------------------------------------------------------------------------------------------------------------------------------------------------------|
| Lachesis_group0__13_contigs__l.g11158 | 106.3583 | 374.5071 | -1.81634 | 0.000449 | 0.007899 | 984  | - && Q5BGA7.1 RecName: Full=Probable NAD(P)H-dependent D-xylose reductase xyl1; Short=XR && PF00248:Aldo/keto reductase family                                                                                                                                                                                            |
| Lachesis_group0__13_contigs__l.g7189  | 45.14998 | 159.5885 | -1.81927 | 0.000166 | 0.003693 | 2550 | - && B0Y3M6.1 RecName: Full=Probable beta-glucosidase I; AltName: Full=Beta-D-glucoside glucohydrolase I; AltName: Full=Cellobiase I; AltName: Full=Gentiobiase I && PF14310:Fibronectin type III-like domain PF00933:Glycosyl hydrolase family 3 N terminal domain PF01915:Glycosyl hydrolase family 3 C-terminal domain |
| Lachesis_group0__13_contigs__l.g6865  | 233.4181 | 824.621  | -1.82041 | 0.00045  | 0.007899 | 1032 | - && P25148.2 RecName: Full=General stress protein A && PF01501:Glycosyl transferase family 8                                                                                                                                                                                                                             |
| Lachesis_group0__13_contigs__l.g845   | 2348.705 | 8328.432 | -1.82618 | 0.000873 | 0.012745 | 4587 | - && - && PF08229:ER membrane protein SH3                                                                                                                                                                                                                                                                                 |
| Lachesis_group0__13_contigs__l.g10640 | 784.423  | 2787.061 | -1.82896 | 5.79E-05 | 0.001713 | 5436 | - && O77033.1 RecName: Full=General transcriptional corepressor trfA && PF13414:TPR repeat                                                                                                                                                                                                                                |
| Lachesis_group0__13_contigs__l.g8631  | 397.6969 | 1412.915 | -1.82903 | 0.002205 | 0.024034 | 1407 | - && P0CO61.1 RecName: Full=Putative lipase ATG15; AltName: Full=Autophagy-related protein 15 && PF01764:Lipase (class 3)                                                                                                                                                                                                 |
| Lachesis_group0__13_contigs__l.g2264  | 439.7426 | 1565.457 | -1.83197 | 4.04E-05 | 0.001304 | 2058 | - && E9R876.1 RecName: Full=MFS gliotoxin efflux transporter gliA; AltName: Full=Gliotoxin biosynthesis protein A && PF07690:Major Facilitator Superfamily                                                                                                                                                                |
| Lachesis_group0__13_contigs__l.g1026  | 125.8817 | 448.1859 | -1.83224 | 3.07E-05 | 0.001055 | 1722 | - && Q86UW6.2 RecName: Full=NEDD4-binding protein 2; Short=N4BP2; AltName: Full=BCL-3-                                                                                                                                                                                                                                    |

|                                       |          |          |          |          |          |      |                                                                                                                                                                                                                                                                                                                                                  |
|---------------------------------------|----------|----------|----------|----------|----------|------|--------------------------------------------------------------------------------------------------------------------------------------------------------------------------------------------------------------------------------------------------------------------------------------------------------------------------------------------------|
|                                       |          |          |          |          |          |      | binding protein && PF08590:Domain of unknown function (DUF1771) PF01713:Smr domain                                                                                                                                                                                                                                                               |
| Lachesis_group0__13_contigs__l.g11147 | 1709.201 | 6100.697 | -1.83561 | 0.000312 | 0.006083 | 1140 | - && Q56WD9.2 RecName: Full=3-ketoacyl-CoA thiolase 2, peroxisomal; AltName: Full=Acetyl-CoA acyltransferase 2; AltName: Full=Beta-ketothiolase 2; AltName: Full=Peroxisomal 3-oxoacyl-CoA thiolase 2; AltName: Full=Peroxisome defective protein 1; Flags: Precursor && PF02803:Thiolase, C-terminal domain PF00108:Thiolase, N-terminal domain |
| Lachesis_group0__13_contigs__l.g10680 | 3257.63  | 11644.2  | -1.83776 | 0.000139 | 0.003262 | 1899 | - && Q12581.1 RecName: Full=Cytochrome P450 52A5; AltName: Full=Alkane-inducible P450-ALK2-A; AltName: Full=CYP11A5 [Candida maltosa] && PF00067:Cytochrome P450                                                                                                                                                                                 |
| Lachesis_group0__13_contigs__l.g10682 | 7738.092 | 27669.58 | -1.83826 | 1.16E-06 | 7.84E-05 | 1206 | - && Q9UUA1.2 RecName: Full=Oxysterol-binding protein homolog C23B6.01c && PF01237:Oxysterol-binding protein                                                                                                                                                                                                                                     |
| Lachesis_group0__13_contigs__l.g2200  | 108.7246 | 390.1199 | -1.8435  | 0.001478 | 0.018081 | 1155 | - && - && PF00150:Cellulase (glycosyl hydrolase family 5)                                                                                                                                                                                                                                                                                        |
| Lachesis_group0__13_contigs__l.g4651  | 1358.732 | 4877.538 | -1.84392 | 6.42E-06 | 0.000308 | 3114 | - && P40317.2 RecName: Full=Protein SOK1 && PF05794:T-complex protein 11                                                                                                                                                                                                                                                                         |
| Lachesis_group0__13_contigs__l.g5402  | 75.38753 | 270.5487 | -1.84462 | 0.000492 | 0.008383 | 2304 | - && Q29496.1 RecName: Full=Cytochrome P450 3A24; AltName: Full=CYP11A24 && PF00067:Cytochrome P450                                                                                                                                                                                                                                              |
| Lachesis_group0__13_contigs__l.g2061  | 42.20981 | 151.7577 | -1.84469 | 0.003093 | 0.031092 | 759  | - && P38310.2 RecName: Full=Iron transporter FTH1 && PF03239:Iron permease FTR1 family                                                                                                                                                                                                                                                           |

|                                       |          |          |          |          |          |      |                                                                                                                                                                                                                                                                      |
|---------------------------------------|----------|----------|----------|----------|----------|------|----------------------------------------------------------------------------------------------------------------------------------------------------------------------------------------------------------------------------------------------------------------------|
| Lachesis_group0__13_contigs__l.g2059  | 86.70378 | 312.9707 | -1.85172 | 3.63E-06 | 0.000197 | 1734 | - && P70786.1 RecName: Full=Putative tartrate transporter && PF07690:Major Facilitator Superfamily                                                                                                                                                                   |
| Lachesis_group0__13_contigs__l.g11221 | 45.1746  | 163.6378 | -1.85771 | 0.002661 | 0.027733 | 1029 | - && Q8Y014.1 RecName: Full=Transaldolase && PF00923:Transaldolase                                                                                                                                                                                                   |
| Lachesis_group0__13_contigs__l.g6881  | 1463.154 | 5306.377 | -1.8586  | 0.000149 | 0.003426 | 1152 | - && - && PF00134:Cyclin, N-terminal domain                                                                                                                                                                                                                          |
| Lachesis_group0__13_contigs__l.g8616  | 30.50488 | 110.9512 | -1.86497 | 0.000972 | 0.013692 | 4218 | - && A2Q8R2.2 RecName: Full=ATP-dependent DNA helicase mph1; AltName: Full=FANCM-like protein 1 && PF00271:Helicase conserved C-terminal domain PF04851:Type III restriction enzyme, res subunit                                                                     |
| Lachesis_group0__13_contigs__l.g5096  | 86.8821  | 317.2578 | -1.86799 | 0.000114 | 0.002824 | 1293 | - && - && PF00339:Arrestin (or S-antigen), N-terminal domain                                                                                                                                                                                                         |
| Lachesis_group0__13_contigs__l.g5403  | 61005.61 | 223216.8 | -1.87144 | 0.000394 | 0.007243 | 1074 | - && P43067.1 RecName: Full=Alcohol dehydrogenase 1; AltName: Full=40 kDa allergen; AltName: Full=Allergen Can a 1; AltName: Full=Allergen Can a I; AltName: Allergen=Cand a 1 && PF08240:Alcohol dehydrogenase GroES-like domain PF00107:Zinc-binding dehydrogenase |
| Lachesis_group0__13_contigs__l.g9431  | 551.4582 | 2019.635 | -1.87271 | 0.000346 | 0.006522 | 744  | - && O13962.1 RecName: Full=Putative cytochrome c1 heme lyase; Short=CC1HL && PF01265:Cytochrome c/c1 heme lyase                                                                                                                                                     |
| Lachesis_group0__13_contigs__l.g10515 | 75.98686 | 278.6633 | -1.87451 | 0.004272 | 0.039801 | 1662 | - && - && PF00501:AMP-binding enzyme                                                                                                                                                                                                                                 |
| Lachesis_group0__13_contigs__l.g9562  | 1435.624 | 5275.039 | -1.87758 | 0.000108 | 0.002701 | 423  | - && D4ALV6.1 RecName: Full=Allergen Asp f 15 homolg && PF07249:Cerato-platanin                                                                                                                                                                                      |
| Lachesis_group0__13_contigs__l.g5514  | 131.8187 | 485.6057 | -1.88097 | 0.000103 | 0.002617 | 840  | - && - && PF09458:H-type lectin domain                                                                                                                                                                                                                               |

|                                       |          |          |          |          |          |      |                                                                                                                                                                                                                                                                                                                                                                              |
|---------------------------------------|----------|----------|----------|----------|----------|------|------------------------------------------------------------------------------------------------------------------------------------------------------------------------------------------------------------------------------------------------------------------------------------------------------------------------------------------------------------------------------|
| Lachesis_group0__13_contigs__l.g10242 | 60.70936 | 225.1981 | -1.89164 | 7.27E-05 | 0.002043 | 1716 | - && P39992.1 RecName: Full=Uncharacterized protein YEL023C && PF09994:Uncharacterized alpha/beta hydrolase domain (DUF2235)                                                                                                                                                                                                                                                 |
| Lachesis_group0__13_contigs__l.g2892  | 437.9319 | 1630.492 | -1.89635 | 0.000154 | 0.003493 | 1668 | - && P0CU32.1 RecName: Full=FAD-linked oxidoreductase CHGG_01242-2; AltName: Full=Chaetoglobosin biosynthesis protein CHGG_01242-2 && PF01565:FAD binding domain                                                                                                                                                                                                             |
| Lachesis_group0__13_contigs__l.g5617  | 71.68017 | 267.6102 | -1.90143 | 0.000761 | 0.011385 | 939  | - && P02723.1 RecName: Full=ADP,ATP carrier protein; AltName: Full=ADP/ATP translocase; AltName: Full=Adenine nucleotide translocator; Short=ANT && PF00153:Mitochondrial carrier protein                                                                                                                                                                                    |
| Lachesis_group0__13_contigs__l.g7531  | 27.55415 | 103.0335 | -1.90332 | 0.004583 | 0.041747 | 963  | - && E1U332.1 RecName: Full=Isoflavone reductase-like protein; AltName: Full=Pollen allergen Ole e 12.01; AltName: Allergen=Ole e 12.01 && PF05368:NmrA-like family                                                                                                                                                                                                          |
| Lachesis_group0__13_contigs__l.g993   | 51.33822 | 193.0739 | -1.91212 | 2.07E-05 | 0.000788 | 1593 | - && B8NHY4.1 RecName: Full=O-methylsterigmatocystin oxidoreductase; Short=OMST oxidoreductase; AltName: Full=Aflatoxin B synthase; AltName: Full=Aflatoxin biosynthesis protein Q; AltName: Full=Cytochrome P450 64 >P0CT93.1 RecName: Full=O-methylsterigmatocystin oxidoreductase; Short=OMST oxidoreductase; AltName: Full=Aflatoxin B synthase; AltName: Full=Aflatoxin |



|                                      |          |          |          |          |          |      |                                                                                                                                                                                                                                                                                                                     |
|--------------------------------------|----------|----------|----------|----------|----------|------|---------------------------------------------------------------------------------------------------------------------------------------------------------------------------------------------------------------------------------------------------------------------------------------------------------------------|
|                                      |          |          |          |          |          |      | biosynthesis protein Q; AltName: Full=Cytochrome P450 64 && PF00067:Cytochrome P450                                                                                                                                                                                                                                 |
| Lachesis_group0__13_contigs__l.g9768 | 90.12265 | 339.402  | -1.91383 | 3.46E-05 | 0.001146 | 2799 | - && Q2U4L7.2 RecName: Full=Glutaminase A; Flags: Precursor && PF16335:Domain of unknown function (DUF4965) PF08760:Domain of unknown function (DUF1793)                                                                                                                                                            |
| Lachesis_group0__13_contigs__l.g1530 | 7583.489 | 28613.56 | -1.91578 | 5.26E-07 | 4.13E-05 | 4059 | - && P40406.1 RecName: Full=Beta-hexosaminidase; AltName: Full=Beta-N-acetylhexosaminidase; AltName: Full=N-acetyl-beta-glucosaminidase; AltName: Full=N-acetylglucosaminidase; AltName: Full=ORF1; Flags: Precursor && PF03127:GAT domain PF00790:VHS domain PF00933:Glycosyl hydrolase family 3 N terminal domain |
| Lachesis_group0__13_contigs__l.g597  | 3217.564 | 12145.82 | -1.91644 | 4.81E-05 | 0.001473 | 966  | - && O14283.2 RecName: Full=Transcription factor prr1; AltName: Full=Pombe response regulator 1 && PF00447:HSF-type DNA-binding                                                                                                                                                                                     |
| Lachesis_group0__13_contigs__l.g5178 | 170.4259 | 643.4233 | -1.91729 | 3.39E-06 | 0.000189 | 1485 | - && O14039.3 RecName: Full=25S rRNA (cytosine-C(5))-methyltransferase rcm1; AltName: Full=rRNA m(5)C methyltransferase 1 && PF01189:16S rRNA methyltransferase RsmF                                                                                                                                                |
| Lachesis_group0__13_contigs__l.g4367 | 26.41578 | 100.7264 | -1.93104 | 0.000682 | 0.010532 | 3351 | - && B8NH4.1 RecName: Full=O-methylsterigmatocystin oxidoreductase; Short=OMST oxidoreductase; AltName: Full=Aflatoxin B synthase; AltName: Full=Aflatoxin biosynthesis protein Q; AltName: Full=Cytochrome P450 64 >P0CT93.1 RecName: Full=O-                                                                      |

|                                      |          |          |          |          |          |      |                                                                                                                                                                                                                               |
|--------------------------------------|----------|----------|----------|----------|----------|------|-------------------------------------------------------------------------------------------------------------------------------------------------------------------------------------------------------------------------------|
|                                      |          |          |          |          |          |      | methylsterigmatocystin oxidoreductase;<br>Short=OMST oxidoreductase; AltName:<br>Full=Aflatoxin B synthase; AltName: Full=Aflatoxin<br>biosynthesis protein Q; AltName: Full=Cytochrome<br>P450 64 && PF00067:Cytochrome P450 |
| Lachesis_group0__13_contigs__l.g5916 | 14.47309 | 55.21273 | -1.93309 | 0.003433 | 0.033728 | 2223 | - && - && PF00271:Helicase conserved C-terminal domain PF00270:DEAD/DEAH box helicase                                                                                                                                         |
| Lachesis_group0__13_contigs__l.g8282 | 80.11779 | 307.1913 | -1.9404  | 5.74E-05 | 0.001706 | 1662 | - && F4JY37.1 RecName: Full=Serine/threonine-protein kinase RUNKEL; AltName: Full=Protein EMBRYO DEFECTIVE 3013; AltName: Full=Protein RUNKEL && PF07714:Protein tyrosine kinase                                              |
| Lachesis_group0__13_contigs__l.g9594 | 39.20872 | 151.0003 | -1.94518 | 0.000239 | 0.00499  | 1008 | - && Q5XGR8.1 RecName: Full=Endoribonuclease LACTB2; AltName: Full=Beta-lactamase-like protein 2 && PF00753:Metallo-beta-lactamase superfamily                                                                                |
| Lachesis_group0__13_contigs__l.g3589 | 35.34568 | 136.4506 | -1.94714 | 0.000279 | 0.005536 | 3213 | - && A0A0D2YG01.1 RecName: Full=Non-canonical non-ribosomal peptide synthetase FUB8; AltName: Full=Fusaric acid biosynthesis protein 8 && PF07993:Male sterility protein PF00501:AMP-binding enzyme                           |
| Lachesis_group0__13_contigs__l.g7558 | 29.63967 | 114.1463 | -1.94805 | 0.001974 | 0.02223  | 1578 | - && Q10087.1 RecName: Full=Uncharacterized amino-acid permease C11D3.08c && PF13520:Amino acid permease                                                                                                                      |
| Lachesis_group0__13_contigs__l.g5374 | 16.83672 | 65.05724 | -1.95204 | 0.005846 | 0.049883 | 1557 | - && G3Y416.1 RecName: Full=Cytochrome P450 monooxygenase yanC; AltName: Full=Yanuthone D synthesis protein C; Flags: Precursor && PF00067:Cytochrome P450                                                                    |

|                                       |          |          |          |          |          |      |                                                                                                                                                                                                                                                                                                                                                                  |
|---------------------------------------|----------|----------|----------|----------|----------|------|------------------------------------------------------------------------------------------------------------------------------------------------------------------------------------------------------------------------------------------------------------------------------------------------------------------------------------------------------------------|
| Lachesis_group0__13_contigs__l.g305   | 7708.734 | 30008.38 | -1.96082 | 0.000283 | 0.0056   | 1650 | - && Q3MIF4.1 RecName: Full=Xylulose kinase; Short=Xylulokinase && PF00370:FGGY family of carbohydrate kinases, N-terminal domain PF02782:FGGY family of carbohydrate kinases, C-terminal domain                                                                                                                                                                 |
| Lachesis_group0__13_contigs__l.g10787 | 1525.701 | 5941.727 | -1.96146 | 1.47E-06 | 9.39E-05 | 2169 | - && Q9Z8P2.1 RecName: Full=3-oxoacyl-[acyl-carrier-protein] reductase FabG; AltName: Full=3-ketoacyl-acyl carrier protein reductase; AltName: Full=Beta-Ketoacyl-acyl carrier protein reductase; AltName: Full=Beta-ketoacyl-ACP reductase && PF00106:short chain dehydrogenase                                                                                 |
| Lachesis_group0__13_contigs__l.g3352  | 132.3401 | 516.3458 | -1.96377 | 8.08E-06 | 0.000369 | 1416 | - && A1CTI3.1 RecName: Full=Probable glucan 1,3-beta-glucosidase D; AltName: Full=Exo-1,3-beta-glucanase D && PF00150:Cellulase (glycosyl hydrolase family 5)                                                                                                                                                                                                    |
| Lachesis_group0__13_contigs__l.g282   | 14.30406 | 55.9394  | -1.96934 | 0.003806 | 0.036529 | 1587 | - && O60020.1 RecName: Full=Aspartic protease; Flags: Precursor && PF00026:Eukaryotic aspartyl protease                                                                                                                                                                                                                                                          |
| Lachesis_group0__13_contigs__l.g2610  | 360.3108 | 1412.834 | -1.97143 | 0.000269 | 0.005413 | 1341 | - && P51660.3 RecName: Full=Peroxisomal multifunctional enzyme type 2; Short=MFE-2; AltName: Full=17-beta-hydroxysteroid dehydrogenase 4; Short=17-beta-HSD 4; AltName: Full=D-bifunctional protein; Short=DBP; AltName: Full=Multifunctional protein 2; Short=MPF-2; Contains: RecName: Full=(3R)-hydroxyacyl-CoA dehydrogenase; Contains: RecName: Full=Enoyl- |

|                                       |          |          |          |          |          |      |                                                                                                                                                                                                                      |
|---------------------------------------|----------|----------|----------|----------|----------|------|----------------------------------------------------------------------------------------------------------------------------------------------------------------------------------------------------------------------|
|                                       |          |          |          |          |          |      | CoA hydratase 2; AltName: Full=3-alpha,7-alpha,12-alpha-trihydroxy-5-beta-cholest-24-enoyl-CoA hydratase && PF01575:MaoC like domain                                                                                 |
| Lachesis_group0__13_contigs__l.g8157  | 1698.977 | 6683.555 | -1.97603 | 9.24E-06 | 0.000406 | 3306 | - && - && PF03370:Carbohydrate/starch-binding module (family 21)                                                                                                                                                     |
| Lachesis_group0__13_contigs__l.g1697  | 1998.391 | 7963.659 | -1.99461 | 3.32E-07 | 2.94E-05 | 2661 | - && Q7ZUW2.1 RecName: Full=Hypoxia up-regulated protein 1; Flags: Precursor && PF00012:Hsp70 protein                                                                                                                |
| Lachesis_group0__13_contigs__l.g11192 | 71.14871 | 283.9119 | -1.99649 | 4.15E-05 | 0.001333 | 2703 | - && - && PF08124:Polysaccharide lyase family 8, N terminal alpha-helical domain PF02278:Polysaccharide lyase family 8, super-sandwich domain PF02884:Polysaccharide lyase family 8, C-terminal beta-sandwich domain |
| Lachesis_group0__13_contigs__l.g1724  | 2859.92  | 11441.73 | -2.00024 | 0.003353 | 0.033157 | 1755 | - && - && PF02179:BAG domain                                                                                                                                                                                         |
| Lachesis_group0__13_contigs__l.g5534  | 545.2601 | 2183.021 | -2.00135 | 6.05E-06 | 0.000296 | 1626 | - && P07921.1 RecName: Full=Lactose permease && PF00083:Sugar (and other) transporter                                                                                                                                |
| Lachesis_group0__13_contigs__l.g10144 | 85.41559 | 342.1686 | -2.00271 | 0.000267 | 0.005395 | 1458 | - && - && PF07690:Major Facilitator Superfamily                                                                                                                                                                      |
| Lachesis_group0__13_contigs__l.g10128 | 18.16137 | 72.76072 | -2.0038  | 0.001001 | 0.013994 | 2388 | - && Q551H4.1 RecName: Full=Serine/threonine-protein kinase fray2; AltName: Full=STE20-like kinase fray2 && PF00069:Protein kinase domain                                                                            |
| Lachesis_group0__13_contigs__l.g2771  | 111.008  | 451.2754 | -2.0238  | 0.000833 | 0.012277 | 1935 | - && Q8NK92.2 RecName: Full=Aorsin; Flags: Precursor && PF09286:Pro-kumamolisin, activation domain                                                                                                                   |
| Lachesis_group0__13_contigs__l.g6060  | 61.67407 | 251.8017 | -2.02985 | 7.03E-05 | 0.001998 | 1308 | - && O34714.1 RecName: Full=Oxalate decarboxylase OxdC && PF00190:Cupin                                                                                                                                              |

|                                       |          |          |          |          |          |      |                                                                                                                                                                                              |
|---------------------------------------|----------|----------|----------|----------|----------|------|----------------------------------------------------------------------------------------------------------------------------------------------------------------------------------------------|
| Lachesis_group0__13_contigs__l.g10552 | 34.08804 | 138.9952 | -2.03014 | 0.000429 | 0.00766  | 1032 | - && Q9UVP6.1 RecName: Full=Versatile peroxidase VPS1; AltName: Full=Versatile solid phase peroxidase 1; Flags: Precursor && PF00141:Peroxidase PF11895:Domain of unknown function (DUF3415) |
| Lachesis_group0__13_contigs__l.g623   | 689.3586 | 2822.644 | -2.03395 | 3.31E-05 | 0.001116 | 1839 | - && P84285.1 RecName: Full=Sterol O-acyltransferase 2; AltName: Full=ASAT; AltName: Full=Sterol-ester synthase && PF03062:MBOAT, membrane-bound O-acyltransferase family                    |
| Lachesis_group0__13_contigs__l.g4553  | 280.9105 | 1153.885 | -2.03817 | 3.40E-07 | 2.99E-05 | 786  | - && D2WKD9.2 RecName: Full=Farnesol dehydrogenase; AltName: Full=NADP+-dependent farnesol dehydrogenase 1; Short=AaSDR-1 && PF00106:short chain dehydrogenase                               |
| Lachesis_group0__13_contigs__l.g8548  | 99.89986 | 412.2567 | -2.0454  | 4.69E-06 | 0.000241 | 2457 | - && D4ATR3.1 RecName: Full=Uncharacterized secreted glycosidase ARB_07629; Flags: Precursor && PF07971:Glycosyl hydrolase family 92                                                         |
| Lachesis_group0__13_contigs__l.g11054 | 34.58445 | 143.7037 | -2.05564 | 0.000308 | 0.006037 | 1509 | - && Q4WAZ6.1 RecName: Full=Multifunctional cytochrome P450 monooxygenase af510; AltName: Full=Fumagillin bioynthesis cluster P450 monooxygenase; Short=Fma-P450 && PF00067:Cytochrome P450  |
| Lachesis_group0__13_contigs__l.g990   | 117.5925 | 489.2842 | -2.05641 | 2.28E-05 | 0.000856 | 2844 | - && Q4WAZ6.1 RecName: Full=Multifunctional cytochrome P450 monooxygenase af510; AltName: Full=Fumagillin bioynthesis cluster P450 monooxygenase; Short=Fma-P450 && PF00067:Cytochrome P450  |

|                                      |          |          |          |          |          |      |                                                                                                                                                                                                                                                                                                                                             |
|--------------------------------------|----------|----------|----------|----------|----------|------|---------------------------------------------------------------------------------------------------------------------------------------------------------------------------------------------------------------------------------------------------------------------------------------------------------------------------------------------|
| Lachesis_group0__13_contigs__l.g9874 | 25.38319 | 105.9169 | -2.06195 | 0.000258 | 0.005273 | 1044 | - && - && PF00230:Major intrinsic protein                                                                                                                                                                                                                                                                                                   |
| Lachesis_group0__13_contigs__l.g3393 | 714.4384 | 2994.019 | -2.06717 | 6.34E-05 | 0.001842 | 2451 | - && Q0CEF3.1 RecName: Full=Probable beta-glucosidase L; AltName: Full=Beta-D-glucoside glucohydrolase L; AltName: Full=Cellobiase L; AltName: Full=Gentiobiase L; Flags: Precursor && PF01915:Glycosyl hydrolase family 3 C-terminal domain PF14310:Fibronectin type III-like domain PF00933:Glycosyl hydrolase family 3 N terminal domain |
| Lachesis_group0__13_contigs__l.g1947 | 16.37331 | 68.97738 | -2.07637 | 0.005099 | 0.045172 | 1215 | - && A6TBU6.1 RecName: Full=2-keto-3-deoxy-L-rhamnonate aldolase; Short=KDR aldolase; AltName: Full=2-dehydro-3-deoxyrhamnonate aldolase && PF03328:HpcH/HpaI aldolase/citrate lyase family                                                                                                                                                 |
| Lachesis_group0__13_contigs__l.g2185 | 53.92062 | 227.4638 | -2.07862 | 0.000722 | 0.010963 | 1935 | - && - && PF00856:SET domain                                                                                                                                                                                                                                                                                                                |
| Lachesis_group0__13_contigs__l.g1248 | 78.92864 | 333.8246 | -2.08182 | 6.97E-05 | 0.001991 | 2037 | - && - && PF05592:Bacterial alpha-L-rhamnosidase                                                                                                                                                                                                                                                                                            |
| Lachesis_group0__13_contigs__l.g4262 | 25.90412 | 110.5352 | -2.09377 | 0.000931 | 0.013367 | 975  | - && B8NM62.1 RecName: Full=Pyridoxamine 5'-phosphate oxidase family protein ustO; AltName: Full=Ustiloxin B biosynthesis protein O && -                                                                                                                                                                                                    |
| Lachesis_group0__13_contigs__l.g4344 | 17.79882 | 75.79237 | -2.0946  | 0.000732 | 0.01108  | 1152 | - && O74957.1 RecName: Full=Protein argonaute; AltName: Full=Cell cycle control protein ago1; AltName: Full=Eukaryotic translation initiation factor 2C 2-like protein ago1; AltName: Full=PAZ Piwi domain protein ago1; AltName: Full=Protein slicer; AltName: Full=RNA interference pathway protein ago1 && PF02171:Piwi domain           |

|                                       |          |          |          |          |          |      |                                                                                                                                                                                                                                    |
|---------------------------------------|----------|----------|----------|----------|----------|------|------------------------------------------------------------------------------------------------------------------------------------------------------------------------------------------------------------------------------------|
| Lachesis_group0__13_contigs__l.g9792  | 54.95141 | 234.5071 | -2.09547 | 0.001008 | 0.014013 | 1719 | - && Q756A9.2 RecName: Full=Acyl-coenzyme A oxidase; Short=Acyl-CoA oxidase && -                                                                                                                                                   |
| Lachesis_group0__13_contigs__l.g7330  | 49.13884 | 210.0616 | -2.09654 | 2.40E-06 | 0.000144 | 1320 | - && A1DDK1.1 RecName: Full=Aspartic protease pep1; AltName: Full=Aspergillopepsin A; AltName: Full=Aspergillopepsin I; Flags: Precursor && PF00026:Eukaryotic aspartyl protease                                                   |
| Lachesis_group0__13_contigs__l.g8727  | 142.8247 | 611.8908 | -2.09872 | 1.25E-06 | 8.34E-05 | 2337 | - && Q9URY8.1 RecName: Full=Probable sulfate permease C869.05c && PF01740:STAS domain PF00916:Sulfate permease family                                                                                                              |
| Lachesis_group0__13_contigs__l.g10950 | 6370.955 | 27334.53 | -2.10116 | 0.000187 | 0.004048 | 981  | - && Q876L8.1 RecName: Full=NAD(P)H-dependent D-xylose reductase xyl1; Short=XR && PF00248:Aldo/keto reductase family                                                                                                              |
| Lachesis_group0__13_contigs__l.g8672  | 15.07447 | 64.8084  | -2.10366 | 0.001547 | 0.018585 | 1674 | - && P42251.3 RecName: Full=Alkaline phosphatase D; Short=APaseD; Flags: Precursor && PF09423:PhoD-like phosphatase PF16655:PhoD-like phosphatase, N-terminal domain                                                               |
| Lachesis_group0__13_contigs__l.g2685  | 174.7439 | 753.1194 | -2.10778 | 1.10E-06 | 7.52E-05 | 897  | - && Q1ZXF1.1 RecName: Full=Probable enoyl-CoA hydratase, mitochondrial; AltName: Full=Enoyl-CoA hydratase 1; AltName: Full=Short-chain enoyl-CoA hydratase; Short=SCEH; Flags: Precursor && PF00378:Enoyl-CoA hydratase/isomerase |
| Lachesis_group0__13_contigs__l.g7972  | 51.58448 | 222.7892 | -2.10972 | 8.41E-06 | 0.000381 | 963  | - && P18631.1 RecName: Full=Low-affinity glucose transporter; AltName: Full=Hexose transporter 1 && PF00083:Sugar (and other) transporter                                                                                          |
| Lachesis_group0__13_contigs__l.g2607  | 20.48101 | 88.78328 | -2.11386 | 0.002048 | 0.022852 | 756  | - && O64519.1 RecName: Full=Metacaspase-6; Short=AtMC6; AltName: Full=Metacaspase 2c;                                                                                                                                              |

|                                       |          |          |          |          |          |      |                                                                                                                                                                                                                                                |
|---------------------------------------|----------|----------|----------|----------|----------|------|------------------------------------------------------------------------------------------------------------------------------------------------------------------------------------------------------------------------------------------------|
|                                       |          |          |          |          |          |      | Short=AtMCP2c; AltName: Full=Metacaspase-5 && PF00656:Caspase domain                                                                                                                                                                           |
| Lachesis_group0__13_contigs__l.g2517  | 28.26478 | 122.8177 | -2.12055 | 0.000297 | 0.00583  | 1395 | - && O34371.1 RecName: Full=Putative oxidoreductase YteT; Flags: Precursor && PF01408:Oxidoreductase family, NAD-binding Rossmann fold PF02894:Oxidoreductase family, C-terminal alpha/beta domain                                             |
| Lachesis_group0__13_contigs__l.g10317 | 126.8623 | 551.5857 | -2.12106 | 6.91E-07 | 5.05E-05 | 2376 | - && O94556.2 RecName: Full=Anaphase-promoting complex subunit 8; AltName: Full=20S cyclosome/APC complex protein apc8; AltName: Full=Cell untimely torn protein 23 && PF04049:Anaphase promoting complex subunit 8 / Cdc23 PF13414:TPR repeat |
| Lachesis_group0__13_contigs__l.g273   | 2348.081 | 10221.66 | -2.12212 | 5.37E-07 | 4.19E-05 | 1488 | - && - && PF05057:Putative serine esterase (DUF676)                                                                                                                                                                                            |
| Lachesis_group0__13_contigs__l.g714   | 169.2153 | 740.6152 | -2.12964 | 6.29E-07 | 4.63E-05 | 1824 | - && Q00730.2 RecName: Full=Putative sterigmatocystin biosynthesis monooxygenase stcW && PF13738:Pyridine nucleotide-disulphide oxidoreductase                                                                                                 |
| Lachesis_group0__13_contigs__l.g7662  | 63.6045  | 278.0359 | -2.12999 | 3.00E-05 | 0.001035 | 2667 | - && P08159.2 RecName: Full=6-hydroxy-D-nicotine oxidase; Short=6-HDNO && PF08031:Berberine and berberine like PF01565:FAD binding domain                                                                                                      |
| Lachesis_group0__13_contigs__l.g1463  | 38.93311 | 171.0676 | -2.1369  | 0.000492 | 0.008383 | 2145 | - && O94564.1 RecName: Full=Zinc-type alcohol dehydrogenase-like protein C1773.06c && PF00107:Zinc-binding                                                                                                                                     |



|                                       |          |          |          |          |          |      |                                                                                                                                                                                                            |
|---------------------------------------|----------|----------|----------|----------|----------|------|------------------------------------------------------------------------------------------------------------------------------------------------------------------------------------------------------------|
|                                       |          |          |          |          |          |      | dehydrogenase PF08240:Alcohol dehydrogenase GroES-like domain                                                                                                                                              |
| Lachesis_group0__13_contigs__l.g10102 | 9.481662 | 42.31954 | -2.15787 | 0.00154  | 0.018585 | 1599 | - && Q9M156.1 RecName: Full=UDP-glycosyltransferase 72B1; AltName: Full=Arbutin synthase; AltName: Full=Probable hydroquinone glucosyltransferase && PF00201:UDP-glucoronosyl and UDP-glucosyl transferase |
| Lachesis_group0__13_contigs__l.g10002 | 28.59723 | 127.4397 | -2.15972 | 0.00515  | 0.045545 | 1059 | - && A8DRH7.1 RecName: Full=L-threo-3-deoxy-hexylosonate aldolase; AltName: Full=L-threo-3-deoxy-hexulosonate aldolase && PF00701:Dihydrodipicolinate synthetase family                                    |
| Lachesis_group0__13_contigs__l.g1173  | 310.9804 | 1389.558 | -2.16017 | 0.003351 | 0.033157 | 1239 | - && O43050.1 RecName: Full=Sterol-4-alpha-carboxylate 3-dehydrogenase, decarboxylating && PF01073:3-beta hydroxysteroid dehydrogenase/isomerase family                                                    |
| Lachesis_group0__13_contigs__l.g4931  | 92.20732 | 415.5339 | -2.17262 | 7.22E-05 | 0.002035 | 834  | - && - && PF12695:Alpha/beta hydrolase family                                                                                                                                                              |
| Lachesis_group0__13_contigs__l.g8917  | 315.6984 | 1426.5   | -2.17615 | 8.33E-05 | 0.002278 | 1029 | - && O95154.2 RecName: Full=Aflatoxin B1 aldehyde reductase member 3; AltName: Full=AFB1 aldehyde reductase 2; Short=AFB1-AR 2 && PF00248:Aldo/keto reductase family                                       |
| Lachesis_group0__13_contigs__l.g10661 | 14.9419  | 67.60725 | -2.17918 | 0.000336 | 0.00639  | 6573 | - && Q8BV79.3 RecName: Full=TPR and ankyrin repeat-containing protein 1; AltName: Full=Lupus brain antigen 1 && PF13361:UvrD-like helicase C-terminal domain PF00580:UvrD/REP helicase N-terminal domain   |

|                                       |          |          |          |          |          |      |                                                                                                                                                                                                                                                                                                                            |
|---------------------------------------|----------|----------|----------|----------|----------|------|----------------------------------------------------------------------------------------------------------------------------------------------------------------------------------------------------------------------------------------------------------------------------------------------------------------------------|
| Lachesis_group0__13_contigs__l.g10170 | 53.68053 | 243.2156 | -2.18039 | 0.001446 | 0.017806 | 1029 | - && P79213.1 RecName: Full=Aquaporin-2; Short=AQP-2; AltName: Full=ADH water channel; AltName: Full=Aquaporin-CD; Short=AQP-CD; AltName: Full=Collecting duct water channel protein; AltName: Full=WCH-CD; AltName: Full=Water channel protein for renal collecting duct && PF00230:Major intrinsic protein               |
| Lachesis_group0__13_contigs__l.g1239  | 71.81856 | 326.2024 | -2.18321 | 2.19E-07 | 2.12E-05 | 4284 | - && Q5UQ40.1 RecName: Full=Probable bifunctional E2/E3 enzyme R795; Includes: RecName: Full=E3 ubiquitin-protein ligase; AltName: Full=RING-type E3 ubiquitin transferase; Includes: RecName: Full=Ubiquitin-conjugating enzyme E2; AltName: Full=E2 ubiquitin-conjugating enzyme && PF00179:Ubiquitin-conjugating enzyme |
| Lachesis_group0__13_contigs__l.g10    | 5233.016 | 23867.48 | -2.18933 | 7.54E-05 | 0.002112 | 1548 | - && P07871.2 RecName: Full=3-ketoacyl-CoA thiolase B, peroxisomal; AltName: Full=Acetyl-CoA acyltransferase B; AltName: Full=Beta-ketothiolase B; AltName: Full=Peroxisomal 3-oxoacyl-CoA thiolase B; Flags: Precursor && PF00108:Thiolase, N-terminal domain PF02803:Thiolase, C-terminal domain                         |
| Lachesis_group0__13_contigs__l.g8910  | 65.20768 | 299.0495 | -2.197   | 0.000522 | 0.008756 | 1701 | - && Q7Z9I0.2 RecName: Full=Uncharacterized MFS-type transporter SPBC409.08 && PF07690:Major Facilitator Superfamily                                                                                                                                                                                                       |

|                                      |          |          |          |          |          |      |                                                                                                                                                                                                                                                                                                                |
|--------------------------------------|----------|----------|----------|----------|----------|------|----------------------------------------------------------------------------------------------------------------------------------------------------------------------------------------------------------------------------------------------------------------------------------------------------------------|
| Lachesis_group0__13_contigs__l.g1014 | 117.5769 | 539.3948 | -2.19801 | 3.99E-06 | 0.000213 | 1542 | - && Q9US44.1 RecName: Full=Uncharacterized transporter C1002.16c && PF07690:Major Facilitator Superfamily                                                                                                                                                                                                     |
| Lachesis_group0__13_contigs__l.g8571 | 22.92429 | 105.5073 | -2.20344 | 2.59E-05 | 0.000939 | 1551 | - && P0CO49.1 RecName: Full=Kynurenine 3-monooxygenase; AltName: Full=Biosynthesis of nicotinic acid protein 4; AltName: Full=Kynurenine 3-hydroxylase && PF01494:FAD binding domain                                                                                                                           |
| Lachesis_group0__13_contigs__l.g5093 | 27.32617 | 125.8339 | -2.2036  | 0.000274 | 0.005481 | 1140 | - && I1S5P3.1 RecName: Full=Global transcription regulator FGP1 && PF09729:Gti1/Pac2 family                                                                                                                                                                                                                    |
| Lachesis_group0__13_contigs__l.g3353 | 79.00065 | 364.8907 | -2.20768 | 0.000145 | 0.003375 | 1422 | - && Q10444.1 RecName: Full=Glucan 1,3-beta-glucosidase 2; AltName: Full=Exo-1,3-beta-glucanase 2; Flags: Precursor && PF00150:Cellulase (glycosyl hydrolase family 5)                                                                                                                                         |
| Lachesis_group0__13_contigs__l.g3871 | 40.58774 | 187.4775 | -2.20879 | 1.58E-05 | 0.000635 | 2310 | - && C5PFX0.2 RecName: Full=Nuclear distribution protein PAC1; AltName: Full=Lissencephaly-1 homolog; Short=LIS-1; AltName: Full=nudF homolog && PF00400:WD domain, G-beta repeat                                                                                                                              |
| Lachesis_group0__13_contigs__l.g1287 | 75.78386 | 351.0323 | -2.21061 | 0.000101 | 0.002597 | 615  | - && - && PF01822:WSC domain                                                                                                                                                                                                                                                                                   |
| Lachesis_group0__13_contigs__l.g6438 | 59.16337 | 274.2103 | -2.21424 | 0.001111 | 0.014755 | 1077 | - && Q76NT9.1 RecName: Full=1-aminocyclopropane-1-carboxylate oxidase; Short=ACC oxidase; Short=Ddaco; AltName: Full=Ethylene-forming enzyme; Short=EFE >A6BM06.1 RecName: Full=1-aminocyclopropane-1-carboxylate oxidase; Short=ACC oxidase; Short=Dmaco; AltName: Full=Ethylene-forming enzyme; Short=EFE && |

|                                      |          |          |          |          |          |      |                                                                                                                                                                                                                                                                                                                        |
|--------------------------------------|----------|----------|----------|----------|----------|------|------------------------------------------------------------------------------------------------------------------------------------------------------------------------------------------------------------------------------------------------------------------------------------------------------------------------|
|                                      |          |          |          |          |          |      | PF03171:2OG-Fe(II) oxygenase superfamily PF14226:non-haem dioxygenase in morphine synthesis N-terminal                                                                                                                                                                                                                 |
| Lachesis_group0__13_contigs__l.g8031 | 549.3762 | 2552.96  | -2.21647 | 3.09E-07 | 2.76E-05 | 2988 | - && Q06681.1 RecName: Full=Membrane-anchored lipid-binding protein YSP2; AltName: Full=Lipid transfer at contact site protein 4; AltName: Full=Lipid transfer protein anchored at membrane contact sites 3; AltName: Full=Yeast suicide protein 2 && PF16016:Domain of unknown function (DUF4782) PF02893:GRAM domain |
| Lachesis_group0__13_contigs__l.g4834 | 655.9588 | 3068.556 | -2.22605 | 2.79E-07 | 2.51E-05 | 1062 | - && Q9P7F4.1 RecName: Full=Zinc-type alcohol dehydrogenase-like protein C2E1P3.01 && PF08240:Alcohol dehydrogenase GroES-like domain PF00107:Zinc-binding dehydrogenase                                                                                                                                               |
| Lachesis_group0__13_contigs__l.g7661 | 23.09186 | 108.9751 | -2.23781 | 4.87E-05 | 0.001489 | 1476 | - && P25737.5 RecName: Full=Lysine-specific permease && PF00324:Amino acid permease                                                                                                                                                                                                                                    |
| Lachesis_group0__13_contigs__l.g5917 | 1874.263 | 8883.123 | -2.24475 | 1.51E-10 | 3.94E-08 | 1050 | - && - && PF03036:Perilipin family                                                                                                                                                                                                                                                                                     |
| Lachesis_group0__13_contigs__l.g6708 | 104.4564 | 496.2827 | -2.2483  | 1.09E-08 | 1.72E-06 | 1128 | - && A1CFY8.2 RecName: Full=Probable D-xylulose reductase A; AltName: Full=Xylitol dehydrogenase A && PF08240:Alcohol dehydrogenase GroES-like domain PF00107:Zinc-binding dehydrogenase                                                                                                                               |
| Lachesis_group0__13_contigs__l.g3061 | 36.5207  | 174.7097 | -2.25741 | 5.37E-06 | 0.00027  | 1419 | - && - && PF00172:Fungal Zn(2)-Cys(6) binuclear cluster domain                                                                                                                                                                                                                                                         |
| Lachesis_group0__13_contigs__l.g281  | 95.93211 | 459.7407 | -2.26117 | 0.001083 | 0.014534 | 2409 | - && - && PF17107:N-terminal domain on NACHT_NTPase and P-loop NTPases                                                                                                                                                                                                                                                 |

|                                      |          |          |          |          |          |      |                                                                                                                                                                                                                                                                                                     |
|--------------------------------------|----------|----------|----------|----------|----------|------|-----------------------------------------------------------------------------------------------------------------------------------------------------------------------------------------------------------------------------------------------------------------------------------------------------|
| Lachesis_group0__13_contigs__l.g5624 | 695.8693 | 3350.607 | -2.26768 | 1.07E-05 | 0.000457 | 1332 | - && Q9P6P9.1 RecName: Full=[Pyruvate dehydrogenase (acetyl-transferring)] kinase, mitochondrial; Short=Pyruvate dehydrogenase kinase; Flags: Precursor && PF10436:Mitochondrial branched-chain alpha-ketoacid dehydrogenase kinase PF02518:Histidine kinase-, DNA gyrase B-, and HSP90-like ATPase |
| Lachesis_group0__13_contigs__l.g8190 | 131.2531 | 631.7578 | -2.26775 | 1.69E-05 | 0.000668 | 1329 | - && - && PF00652:Ricin-type beta-trefoil lectin domain                                                                                                                                                                                                                                             |
| Lachesis_group0__13_contigs__l.g3254 | 131.0556 | 641.5814 | -2.29103 | 1.13E-05 | 0.000478 | 3033 | - && - && PF00004:ATPase family associated with various cellular activities (AAA)                                                                                                                                                                                                                   |
| Lachesis_group0__13_contigs__l.g7108 | 15.17121 | 74.27791 | -2.29355 | 9.81E-05 | 0.002563 | 1278 | - && P41816.2 RecName: Full=NADPH dehydrogenase 3; AltName: Full=Old yellow enzyme 3 && PF00724:NADH:flavin oxidoreductase / NADH oxidase family                                                                                                                                                    |
| Lachesis_group0__13_contigs__l.g7087 | 298.8659 | 1467.308 | -2.29574 | 0.000262 | 0.005311 | 2643 | - && B7GFR1.1 RecName: Full=Aspartate--tRNA(Asp/Asn) ligase; AltName: Full=Aspartyl-tRNA synthetase; Short=AspRS; AltName: Full=Non-discriminating aspartyl-tRNA synthetase; Short=ND-AspRS && PF00152:tRNA synthetases class II (D, K and N)                                                       |
| Lachesis_group0__13_contigs__l.g1952 | 36.19839 | 177.9918 | -2.29623 | 0.000433 | 0.007725 | 444  | - && - && PF16850:Peptidase inhibitor I66                                                                                                                                                                                                                                                           |
| Lachesis_group0__13_contigs__l.g8786 | 192.5439 | 948.8759 | -2.30127 | 9.32E-08 | 1.04E-05 | 1053 | - && O42909.1 RecName: Full=Zinc-type alcohol dehydrogenase-like protein C16A3.02c && PF13602:Zinc-binding dehydrogenase                                                                                                                                                                            |

|                                       |          |          |          |          |          |      |                                                                                                                                                                                                                                                                                                                                                                                                                                               |
|---------------------------------------|----------|----------|----------|----------|----------|------|-----------------------------------------------------------------------------------------------------------------------------------------------------------------------------------------------------------------------------------------------------------------------------------------------------------------------------------------------------------------------------------------------------------------------------------------------|
| Lachesis_group0__13_contigs__l.g1953  | 20.48362 | 101.4558 | -2.31074 | 0.000394 | 0.007243 | 1104 | - && - && PF00149:Calcineurin-like phosphoesterase                                                                                                                                                                                                                                                                                                                                                                                            |
| Lachesis_group0__13_contigs__l.g317   | 78.2483  | 389.2061 | -2.314   | 0.000101 | 0.002597 | 1626 | - && - && PF00172:Fungal Zn(2)-Cys(6) binuclear cluster domain                                                                                                                                                                                                                                                                                                                                                                                |
| Lachesis_group0__13_contigs__l.g11168 | 38.23249 | 192.0309 | -2.33049 | 4.65E-05 | 0.001443 | 1026 | - && Q8ZTE1.1 RecName: Full=Ketol-acid reductoisomerase (NADP(+)); Short=KARI; AltName: Full=Acetohydroxy-acid isomeroreductase; Short=AHIR; AltName: Full=Alpha-keto-beta-hydroxylacyl reductoisomerase; AltName: Full=Ketol-acid reductoisomerase type 1; AltName: Full=Ketol-acid reductoisomerase type I && PF07991:Acetohydroxy acid isomeroreductase, NADPH-binding domain PF01450:Acetohydroxy acid isomeroreductase, catalytic domain |
| Lachesis_group0__13_contigs__l.g10551 | 38.12325 | 191.7842 | -2.33303 | 0.001065 | 0.01444  | 1887 | - && Q9FVQ0.1 RecName: Full=Probable indole-3-pyruvate monooxygenase YUCCA10; AltName: Full=Flavin-containing monooxygenase YUCCA10 && PF13738:Pyridine nucleotide-disulphide oxidoreductase                                                                                                                                                                                                                                                  |
| Lachesis_group0__13_contigs__l.g4414  | 8.774312 | 44.25679 | -2.34061 | 0.00398  | 0.037921 | 1326 | - && O94343.1 RecName: Full=Uncharacterized MFS-type transporter C1271.10c && PF07690:Major Facilitator Superfamily                                                                                                                                                                                                                                                                                                                           |
| Lachesis_group0__13_contigs__l.g6432  | 79.12319 | 401.3241 | -2.34253 | 4.74E-09 | 8.12E-07 | 621  | - && - && PF00076:RNA recognition motif. (a.k.a. RRM, RBD, or RNP domain)                                                                                                                                                                                                                                                                                                                                                                     |
| Lachesis_group0__13_contigs__l.g9821  | 859.3987 | 4380.599 | -2.34986 | 6.17E-07 | 4.60E-05 | 4662 | - && - && PF00069:Protein kinase domain                                                                                                                                                                                                                                                                                                                                                                                                       |

|                                      |          |          |          |          |          |      |                                                                                                                                                                                                                                                                                                                                                                                                           |
|--------------------------------------|----------|----------|----------|----------|----------|------|-----------------------------------------------------------------------------------------------------------------------------------------------------------------------------------------------------------------------------------------------------------------------------------------------------------------------------------------------------------------------------------------------------------|
| Lachesis_group0__13_contigs__l.g4810 | 30.24156 | 155.7144 | -2.36512 | 0.000488 | 0.00836  | 1398 | - && - && PF01231:Indoleamine 2,3-dioxygenase                                                                                                                                                                                                                                                                                                                                                             |
| Lachesis_group0__13_contigs__l.g5020 | 465.0949 | 2408.618 | -2.37269 | 7.77E-07 | 5.64E-05 | 1728 | - && Q47944.1 RecName: Full=L-sorbose 1-dehydrogenase; Short=SDH && PF00732:GMC oxidoreductase PF05199:GMC oxidoreductase                                                                                                                                                                                                                                                                                 |
| Lachesis_group0__13_contigs__l.g3662 | 8.671326 | 44.85142 | -2.37512 | 0.000415 | 0.007499 | 798  | - && - && PF11807:Domain of unknown function (DUF3328)                                                                                                                                                                                                                                                                                                                                                    |
| Lachesis_group0__13_contigs__l.g1698 | 29.37246 | 153.7931 | -2.38649 | 1.20E-05 | 0.000505 | 1695 | - && - && PF00651:BTB/POZ domain                                                                                                                                                                                                                                                                                                                                                                          |
| Lachesis_group0__13_contigs__l.g4961 | 11.75609 | 61.38388 | -2.39107 | 0.001561 | 0.018673 | 1107 | - && Q9HEZ1.1 RecName: Full=Endo-1,4-beta-xylanase A; Short=Xylanase A; AltName: Full=1,4-beta-D-xylan xylanohydrolase A; Flags: Precursor && PF00331:Glycosyl hydrolase family 10                                                                                                                                                                                                                        |
| Lachesis_group0__13_contigs__l.g5294 | 20.366   | 106.8336 | -2.39219 | 0.001274 | 0.016163 | 975  | - && - && PF05577:Serine carboxypeptidase S28                                                                                                                                                                                                                                                                                                                                                             |
| Lachesis_group0__13_contigs__l.g6589 | 27.75033 | 146.6522 | -2.40139 | 5.71E-05 | 0.0017   | 1104 | - && O13629.1 RecName: Full=Putative lipoate-protein ligase A && -                                                                                                                                                                                                                                                                                                                                        |
| Lachesis_group0__13_contigs__l.g2810 | 17.43105 | 92.02063 | -2.40186 | 0.001474 | 0.018069 | 882  | - && P24665.1 RecName: Full=Aspergillopepsin-2; AltName: Full=Acid protease A; AltName: Full=Aspergillopepsin II; AltName: Full=Proctase A; Contains: RecName: Full=Aspergillopepsin-2 light chain; AltName: Full=Aspergillopepsin II light chain; Contains: RecName: Full=Aspergillopepsin-2 heavy chain; AltName: Full=Aspergillopepsin II heavy chain; Flags: Precursor && PF01828:Peptidase A4 family |
| Lachesis_group0__13_contigs__l.g4940 | 1601.806 | 8472.739 | -2.40311 | 0.000198 | 0.004251 | 1140 | - && Q06497.1 RecName: Full=Peroxisomal adenine nucleotide transporter 1 && PF00153:Mitochondrial carrier protein                                                                                                                                                                                                                                                                                         |

|                                       |          |          |          |          |          |      |                                                                                                                                                                                                                                                                               |
|---------------------------------------|----------|----------|----------|----------|----------|------|-------------------------------------------------------------------------------------------------------------------------------------------------------------------------------------------------------------------------------------------------------------------------------|
| Lachesis_group0__13_contigs__l.g4939  | 10.07746 | 53.4017  | -2.40571 | 0.000279 | 0.005536 | 1026 | - && - && PF10294:Lysine methyltransferase                                                                                                                                                                                                                                    |
| Lachesis_group0__13_contigs__l.g5078  | 8854.321 | 46941.4  | -2.40642 | 0.000121 | 0.002932 | 2307 | - && O74770.1 RecName: Full=Probable phosphoketolase && PF09363:XFP C-terminal domain PF09364:XFP N-terminal domain PF03894:D-xylulose 5-phosphate/D-fructose 6-phosphate phosphoketolase                                                                                     |
| Lachesis_group0__13_contigs__l.g7337  | 8.038406 | 42.75057 | -2.41253 | 0.000714 | 0.010899 | 1815 | - && - && PF00076:RNA recognition motif. (a.k.a. RRM, RBD, or RNP domain)                                                                                                                                                                                                     |
| Lachesis_group0__13_contigs__l.g10375 | 2445.144 | 13129.39 | -2.42482 | 3.17E-08 | 4.42E-06 | 510  | - && - && PF02755:RPEL repeat                                                                                                                                                                                                                                                 |
| novel.1164                            | 248.4465 | 1334.225 | -2.42516 | 1.93E-07 | 1.92E-05 | 2041 | - && - && PF10164:Uncharacterized conserved protein (DUF2367)                                                                                                                                                                                                                 |
| Lachesis_group0__13_contigs__l.g5712  | 31.93464 | 171.2231 | -2.426   | 2.99E-05 | 0.001033 | 2346 | - && - && PF00069:Protein kinase domain                                                                                                                                                                                                                                       |
| Lachesis_group0__13_contigs__l.g8160  | 38.73036 | 208.1735 | -2.42754 | 0.000145 | 0.003375 | 1380 | - && P23262.4 RecName: Full=Salicylate hydroxylase; AltName: Full=Salicylate 1-monooxygenase && PF13450:NAD(P)-binding Rossmann-like domain PF01494:FAD binding domain                                                                                                        |
| Lachesis_group0__13_contigs__l.g7082  | 436.2204 | 2352.977 | -2.4314  | 1.66E-05 | 0.000662 | 1368 | - && Q8RWZ3.1 RecName: Full=Probable acyl-CoA dehydrogenase IBR3; AltName: Full=Protein INDOLE-3-BUTYRIC ACID RESPONSE 3 && PF00441:Acyl-CoA dehydrogenase, C-terminal domain PF02770:Acyl-CoA dehydrogenase, middle domain PF02771:Acyl-CoA dehydrogenase, N-terminal domain |
| Lachesis_group0__13_contigs__l.g6641  | 712.4141 | 3843.506 | -2.43159 | 3.38E-11 | 1.11E-08 | 2220 | - && Q95M17.1 RecName: Full=Acidic mammalian chitinase; Short=AMCase; AltName: Full=Chitin-                                                                                                                                                                                   |



|                                       |          |          |          |          |          |      |                                                                                                                                                                                                                                                                                                                                                                            |
|---------------------------------------|----------|----------|----------|----------|----------|------|----------------------------------------------------------------------------------------------------------------------------------------------------------------------------------------------------------------------------------------------------------------------------------------------------------------------------------------------------------------------------|
|                                       |          |          |          |          |          |      | binding protein b04; Short=CBPb04; Flags: Precursor<br>&& PF00704:Glycosyl hydrolases family 18                                                                                                                                                                                                                                                                            |
| Lachesis_group0__13_contigs__l.g1146  | 151.9484 | 820.1145 | -2.43271 | 2.88E-08 | 4.07E-06 | 2244 | - && P32816.1 RecName: Full=Glycerol dehydrogenase; Short=GDH; Short=GLDH; Short=GlyDH && PF00465:Iron-containing alcohol dehydrogenase                                                                                                                                                                                                                                    |
| Lachesis_group0__13_contigs__l.g6191  | 56.23651 | 305.2065 | -2.43992 | 9.39E-08 | 1.04E-05 | 1002 | - && Q9UTA1.2 RecName: Full=Zinc finger protein C25B8.19c && -                                                                                                                                                                                                                                                                                                             |
| Lachesis_group0__13_contigs__l.g11178 | 757.3722 | 4146.339 | -2.45283 | 3.85E-08 | 5.11E-06 | 936  | - && O13780.1 RecName: Full=Uncharacterized protein C17G6.02c && PF04479:RTA1 like protein                                                                                                                                                                                                                                                                                 |
| Lachesis_group0__13_contigs__l.g10899 | 452.7788 | 2480.042 | -2.45338 | 0.000209 | 0.004444 | 1500 | - && Q54HD2.1 RecName: Full=Probable serine/threonine-protein kinase ndrD; AltName: Full=Nuclear DBF2-related kinase D && PF00069:Protein kinase domain                                                                                                                                                                                                                    |
| Lachesis_group0__13_contigs__l.g5100  | 426.243  | 2365.045 | -2.47231 | 1.15E-07 | 1.27E-05 | 537  | - && B0DN41.1 RecName: Full=Cyanate hydratase; Short=Cyanase; AltName: Full=Cyanate hydrolase; AltName: Full=Cyanate lyase && PF02560:Cyanate lyase C-terminal domain                                                                                                                                                                                                      |
| Lachesis_group0__13_contigs__l.g4541  | 19.12166 | 106.0708 | -2.47518 | 0.000325 | 0.006264 | 1155 | - && Q8RXK7.2 RecName: Full=Probable pectinesterase/pectinesterase inhibitor 41; Includes: RecName: Full=Pectinesterase inhibitor 41; AltName: Full=Pectin methylesterase inhibitor 41; Includes: RecName: Full=Pectinesterase 41; Short=PE 41; AltName: Full=AtPMEpcrB; AltName: Full=Pectin methylesterase 41; Short=AtPME41; Flags: Precursor && PF01095:Pectinesterase |

|                                      |          |          |          |          |          |      |                                                                                                                                                                                                                                                                                                                                                                                                                                                                                                                                                                                                       |
|--------------------------------------|----------|----------|----------|----------|----------|------|-------------------------------------------------------------------------------------------------------------------------------------------------------------------------------------------------------------------------------------------------------------------------------------------------------------------------------------------------------------------------------------------------------------------------------------------------------------------------------------------------------------------------------------------------------------------------------------------------------|
| Lachesis_group0__13_contigs__l.g3548 | 64.28439 | 360.9824 | -2.49081 | 9.62E-05 | 0.002533 | 3453 | - && A0A0D2YG01.1 RecName: Full=Non-canonical non-ribosomal peptide synthetase FUB8; AltName: Full=Fusaric acid biosynthesis protein 8 && PF00501:AMP-binding enzyme PF07993:Male sterility protein                                                                                                                                                                                                                                                                                                                                                                                                   |
| Lachesis_group0__13_contigs__l.g5028 | 38.30985 | 215.1849 | -2.49111 | 0.001775 | 0.020485 | 540  | - && - && PF05368:NmrA-like family                                                                                                                                                                                                                                                                                                                                                                                                                                                                                                                                                                    |
| Lachesis_group0__13_contigs__l.g4400 | 8.904758 | 50.05278 | -2.49279 | 0.000736 | 0.01111  | 1845 | - && Q47944.1 RecName: Full=L-sorbose 1-dehydrogenase; Short=SDH && PF05199:GMC oxidoreductase PF00732:GMC oxidoreductase                                                                                                                                                                                                                                                                                                                                                                                                                                                                             |
| Lachesis_group0__13_contigs__l.g8679 | 15.26927 | 85.73351 | -2.49353 | 0.000766 | 0.011436 | 1776 | - && P81898.2 RecName: Full=Peptide-N4-(N-acetyl-beta-glucosaminy)asparagine amidase A; Short=PNGase A; AltName: Full=Glycopeptide N-glycosidase; AltName: Full=N-glycanase; Contains: RecName: Full=Peptide-N4-(N-acetyl-beta-glucosaminy)asparagine amidase A light chain; AltName: Full=PNGase A small chain; AltName: Full=PNGase A subunit B; Contains: RecName: Full=Peptide-N4-(N-acetyl-beta-glucosaminy)asparagine amidase A heavy chain; AltName: Full=PNGase A large chain; Short=PNGase A subunit A [Prunus dulcis] && PF12222:Peptide N-acetyl-beta-D-glucosaminy asparaginase amidase A |
| Lachesis_group0__13_contigs__l.g9432 | 2631.392 | 14868.48 | -2.49835 | 0.000277 | 0.005516 | 1062 | - && O06179.1 RecName: Full=Putative monooxygenase Rv1533 && PF03060:Nitronate monooxygenase                                                                                                                                                                                                                                                                                                                                                                                                                                                                                                          |

|                                       |          |          |          |          |          |      |                                                                                                                                                                                                                                                                                                                                                                                                                                                          |
|---------------------------------------|----------|----------|----------|----------|----------|------|----------------------------------------------------------------------------------------------------------------------------------------------------------------------------------------------------------------------------------------------------------------------------------------------------------------------------------------------------------------------------------------------------------------------------------------------------------|
| Lachesis_group0__13_contigs__l.g8991  | 69.69668 | 394.5386 | -2.5009  | 9.22E-05 | 0.002453 | 1092 | - && Q6GBM4.1 RecName: Full=Alcohol dehydrogenase; Short=ADH >Q6GJ63.1 RecName: Full=Alcohol dehydrogenase; Short=ADH >Q8NXU1.1 RecName: Full=Alcohol dehydrogenase; Short=ADH >Q5HI63.1 RecName: Full=Alcohol dehydrogenase; Short=ADH >Q2G0G1.1 RecName: Full=Alcohol dehydrogenase; Short=ADH >Q2FJ31.1 RecName: Full=Alcohol dehydrogenase; Short=ADH >Q2YSX0.1 RecName: Full=Alcohol dehydrogenase; Short=ADH && PF00107:Zinc-binding dehydrogenase |
| Lachesis_group0__13_contigs__l.g10011 | 58.26912 | 330.0055 | -2.50289 | 0.00064  | 0.010056 | 2391 | - && D4B0V1.1 RecName: Full=Probable glucan endo-1,3-beta-glucosidase ARB_02077; AltName: Full=(1->3)-beta-glucan endohydrolase ARB_02077; Short=(1->3)-beta-glucanase ARB_02077; Flags: Precursor && PF12708:Pectate lyase superfamily protein                                                                                                                                                                                                          |
| Lachesis_group0__13_contigs__l.g3509  | 53.60493 | 309.6902 | -2.5317  | 0.0012   | 0.015448 | 1569 | - && Q01679.2 RecName: Full=Laccase; AltName: Full=Benzenediol:oxygen oxidoreductase; AltName: Full=Diphenol oxidase; AltName: Full=Ligninolytic phenoloxidase; AltName: Full=Urishiol oxidase; Flags: Precursor && PF00394:Multicopper oxidase PF07732:Multicopper oxidase PF07731:Multicopper oxidase                                                                                                                                                  |

|                                      |          |          |          |          |          |      |                                                                                                                                                                                                                                                                                                                                                                                                                                     |
|--------------------------------------|----------|----------|----------|----------|----------|------|-------------------------------------------------------------------------------------------------------------------------------------------------------------------------------------------------------------------------------------------------------------------------------------------------------------------------------------------------------------------------------------------------------------------------------------|
| Lachesis_group0__13_contigs__l.g4886 | 358.301  | 2076.712 | -2.53532 | 3.77E-07 | 3.20E-05 | 1851 | - && O23461.1 RecName: Full=L-arabinokinase; Short=AtISA1 && PF13528:Glycosyl transferase family 1                                                                                                                                                                                                                                                                                                                                  |
| Lachesis_group0__13_contigs__l.g9423 | 43.71851 | 253.5164 | -2.53679 | 2.55E-06 | 0.000148 | 1491 | - && - && PF07690:Major Facilitator Superfamily                                                                                                                                                                                                                                                                                                                                                                                     |
| Lachesis_group0__13_contigs__l.g5530 | 184.2234 | 1089.095 | -2.56395 | 0.000235 | 0.004926 | 1578 | - && P07921.1 RecName: Full=Lactose permease && PF00083:Sugar (and other) transporter                                                                                                                                                                                                                                                                                                                                               |
| Lachesis_group0__13_contigs__l.g4273 | 9.874096 | 59.42771 | -2.58895 | 0.000588 | 0.009562 | 1374 | - && - && PF03595:Voltage-dependent anion channel                                                                                                                                                                                                                                                                                                                                                                                   |
| Lachesis_group0__13_contigs__l.g8558 | 449.2223 | 2705.973 | -2.5907  | 1.06E-06 | 7.27E-05 | 1398 | - && Q50I20.1 RecName: Full=2-methylcitrate synthase, mitochondrial; Short=Methylcitrate synthase; AltName: Full=(2S,3S)-2-methylcitrate synthase; AltName: Full=Citrate synthase 1; Flags: Precursor >B0YD89.1 RecName: Full=2-methylcitrate synthase, mitochondrial; Short=Methylcitrate synthase; AltName: Full=(2S,3S)-2-methylcitrate synthase; AltName: Full=Citrate synthase 2; Flags: Precursor && PF00285:Citrate synthase |
| Lachesis_group0__13_contigs__l.g8376 | 429.9717 | 2596.688 | -2.59432 | 0.000223 | 0.0047   | 339  | - && - && PF01185:Fungal hydrophobin                                                                                                                                                                                                                                                                                                                                                                                                |
| Lachesis_group0__13_contigs__l.g7748 | 1573.011 | 9706.311 | -2.62537 | 2.07E-05 | 0.000788 | 849  | - && - && PF08325:WLM domain                                                                                                                                                                                                                                                                                                                                                                                                        |
| Lachesis_group0__13_contigs__l.g3661 | 7.279163 | 45.0613  | -2.63628 | 0.001618 | 0.019161 | 792  | - && - && PF11807:Domain of unknown function (DUF3328)                                                                                                                                                                                                                                                                                                                                                                              |
| Lachesis_group0__13_contigs__l.g9472 | 34.79686 | 216.1817 | -2.63661 | 0.000111 | 0.002768 | 1485 | - && A1CFL6.2 RecName: Full=Cytochrome P450 monooxygenase patI; AltName: Full=Patulin synthesis protein I; AltName: Full=m-                                                                                                                                                                                                                                                                                                         |

|                                      |          |          |          |          |          |      |                                                                                                                                                                                                                      |
|--------------------------------------|----------|----------|----------|----------|----------|------|----------------------------------------------------------------------------------------------------------------------------------------------------------------------------------------------------------------------|
|                                      |          |          |          |          |          |      | hydroxybenzyl alcohol hydroxylase; Flags: Precursor && PF00067:Cytochrome P450                                                                                                                                       |
| Lachesis_group0__13_contigs__l.g6519 | 7466.775 | 46805.6  | -2.64812 | 2.34E-08 | 3.40E-06 | 1803 | - && Q09653.3 RecName: Full=Putative cytochrome P450 CYP13A10 && PF00067:Cytochrome P450                                                                                                                             |
| Lachesis_group0__13_contigs__l.g5160 | 803.6134 | 5072.574 | -2.65811 | 7.49E-10 | 1.67E-07 | 990  | - && O23300.1 RecName: Full=Enoyl-CoA delta isomerase 3; AltName: Full=3-hydroxyacyl-CoA dehydratase 1; AltName: Full=Delta(3),Delta(2)-enoyl CoA isomerase 3; Short=AtECI3 && PF00378:Enoyl-CoA hydratase/isomerase |
| Lachesis_group0__13_contigs__l.g2276 | 57.0547  | 359.9755 | -2.65813 | 8.58E-08 | 9.86E-06 | 1551 | - && Q25BW4.1 RecName: Full=Beta-glucosidase 1B; AltName: Full=Cellobiase 1B && PF00232:Glycosyl hydrolase family 1                                                                                                  |
| Lachesis_group0__13_contigs__l.g7950 | 23.40773 | 147.645  | -2.65961 | 0.000154 | 0.003493 | 1371 | - && A9JPE2.1 RecName: Full=Cytochrome P450 monooxygenase atmQ; AltName: Full=Aflatrem synthesis protein Q && PF00067:Cytochrome P450                                                                                |
| novel.536                            | 9.966571 | 62.92743 | -2.66494 | 0.000152 | 0.003464 | 1339 | - && Q0CJ60.1 RecName: Full=Cyclase atC; AltName: Full=Terreic acid biosynthesis cluster protein C; Flags: Precursor && PF00732:GMC oxidoreductase PF05199:GMC oxidoreductase                                        |
| Lachesis_group0__13_contigs__l.g3973 | 22.32783 | 141.9066 | -2.66863 | 5.19E-06 | 0.000263 | 723  | - && O94255.2 RecName: Full=Carbonic anhydrase; AltName: Full=Carbonate dehydratase && PF00484:Carbonic anhydrase                                                                                                    |
| Lachesis_group0__13_contigs__l.g8423 | 64.90055 | 412.8734 | -2.67    | 4.41E-07 | 3.57E-05 | 900  | - && Q9X248.1 RecName: Full=3-oxoacyl-[acyl-carrier-protein] reductase FabG; AltName: Full=3-ketoacyl-acyl carrier protein reductase; AltName: Full=Beta-Ketoacyl-acyl carrier protein reductase;                    |

|                                       |          |          |          |          |          |      |                                                                                                                                                                                                                                                                                         |
|---------------------------------------|----------|----------|----------|----------|----------|------|-----------------------------------------------------------------------------------------------------------------------------------------------------------------------------------------------------------------------------------------------------------------------------------------|
|                                       |          |          |          |          |          |      | AltName: Full=Beta-ketoacyl-ACP reductase && PF00106:short chain dehydrogenase                                                                                                                                                                                                          |
| Lachesis_group0__13_contigs__l.g11055 | 37.51234 | 240.5971 | -2.68237 | 7.23E-08 | 8.69E-06 | 1554 | - && Q4WAZ6.1 RecName: Full=Multifunctional cytochrome P450 monooxygenase af510; AltName: Full=Fumagillin bioynthesis cluster P450 monooxygenase; Short=Fma-P450 && PF00067:Cytochrome P450                                                                                             |
| Lachesis_group0__13_contigs__l.g552   | 45.96372 | 295.1983 | -2.68273 | 2.57E-09 | 5.06E-07 | 1968 | - && Q5G234.1 RecName: Full=Pyranose 2-oxidase; Short=P2Ox; Short=POD; Short=POx; Short=PROD; Short=Pyranose oxidase; AltName: Full=FAD-oxidoreductase; AltName: Full=Glucose 2-oxidase; AltName: Full=Pyranose:oxygen 2-oxidoreductase; Flags: Precursor && PF05199:GMC oxidoreductase |
| Lachesis_group0__13_contigs__l.g5591  | 44.91338 | 288.3699 | -2.68441 | 9.63E-07 | 6.75E-05 | 1479 | - && Q0QWS4.1 RecName: Full=L-galactonate dehydratase && PF13378:Enolase C-terminal domain-like PF02746:Mandelate racemase / muconate lactonizing enzyme, N-terminal domain                                                                                                             |
| Lachesis_group0__13_contigs__l.g1789  | 1289.746 | 8310.735 | -2.68799 | 2.50E-06 | 0.000147 | 396  | - && - && PF03330:Rare lipoprotein A (RlpA)-like double-psi beta-barrel                                                                                                                                                                                                                 |
| Lachesis_group0__13_contigs__l.g8704  | 120.0496 | 776.7698 | -2.69425 | 1.99E-07 | 1.97E-05 | 1488 | - && - && PF04616:Glycosyl hydrolases family 43                                                                                                                                                                                                                                         |
| Lachesis_group0__13_contigs__l.g5077  | 846.2914 | 5511.083 | -2.70325 | 1.81E-07 | 1.86E-05 | 1395 | - && Q7SH17.3 RecName: Full=Probable acetate kinase; AltName: Full=Acetokinase >Q5B3G6.2 RecName: Full=Probable acetate kinase; AltName: Full=Acetokinase && PF00871:Acetokinase family                                                                                                 |

|                                       |          |          |          |          |          |      |                                                                                                                                                                                                                            |
|---------------------------------------|----------|----------|----------|----------|----------|------|----------------------------------------------------------------------------------------------------------------------------------------------------------------------------------------------------------------------------|
| Lachesis_group0__13_contigs__l.g10845 | 14.1631  | 92.16281 | -2.70603 | 0.00483  | 0.043412 | 966  | - && O74959.1 RecName: Full=Uncharacterized oxidoreductase C736.13 && PF00106:short chain dehydrogenase                                                                                                                    |
| Lachesis_group0__13_contigs__l.g4534  | 93.07207 | 612.753  | -2.71895 | 2.63E-10 | 6.25E-08 | 1710 | - && P45598.1 RecName: Full=Arabinose-proton symporter; AltName: Full=Arabinose transporter && PF00083:Sugar (and other) transporter                                                                                       |
| Lachesis_group0__13_contigs__l.g7335  | 6.222274 | 41.05297 | -2.72564 | 0.0012   | 0.015448 | 1587 | - && P49374.1 RecName: Full=High-affinity glucose transporter && PF00083:Sugar (and other) transporter                                                                                                                     |
| Lachesis_group0__13_contigs__l.g7749  | 42.32308 | 281.8881 | -2.73425 | 2.70E-07 | 2.45E-05 | 1068 | - && P0CU27.1 RecName: Full=Protein-lysine N-methyltransferase EFM3; AltName: Full=Elongation factor methyltransferase 3 && PF10294:Lysine methyltransferase                                                               |
| Lachesis_group0__13_contigs__l.g7311  | 6.783078 | 45.17547 | -2.73452 | 0.000873 | 0.012745 | 4488 | - && - && PF08719:Domain of unknown function (DUF1768)                                                                                                                                                                     |
| Lachesis_group0__13_contigs__l.g2057  | 94.02483 | 629.7902 | -2.74329 | 7.78E-06 | 0.000358 | 1098 | - && - && PF05368:NmrA-like family                                                                                                                                                                                         |
| Lachesis_group0__13_contigs__l.g11360 | 7668.589 | 51685.91 | -2.75276 | 4.38E-10 | 1.02E-07 | 1017 | - && A1CFL1.1 RecName: Full=Alcohol dehydrogenase patD; AltName: Full=Patulin synthesis protein D && PF08240:Alcohol dehydrogenase GroES-like domain PF00107:Zinc-binding dehydrogenase                                    |
| Lachesis_group0__13_contigs__l.g5507  | 317.3286 | 2138.648 | -2.75282 | 2.55E-06 | 0.000148 | 708  | - && P37769.2 RecName: Full=2-dehydro-3-deoxy-D-gluconate 5-dehydrogenase; AltName: Full=2-deoxy-D-gluconate 3-dehydrogenase; AltName: Full=2-keto-3-deoxygluconate 5-dehydrogenase; AltName: Full=2-keto-3-deoxygluconate |

|                                       |          |          |          |          |          |      |                                                                                                                                                                                                                                                                                                                                               |
|---------------------------------------|----------|----------|----------|----------|----------|------|-----------------------------------------------------------------------------------------------------------------------------------------------------------------------------------------------------------------------------------------------------------------------------------------------------------------------------------------------|
|                                       |          |          |          |          |          |      | oxidoreductase; Short=KDG oxidoreductase; AltName: Full=20-ketosteroid reductase && PF00106:short chain dehydrogenase                                                                                                                                                                                                                         |
| Lachesis_group0__13_contigs__l.g9498  | 49.50716 | 336.031  | -2.76308 | 2.05E-05 | 0.000785 | 2595 | - && Q0CAF5.1 RecName: Full=Probable beta-glucosidase I; AltName: Full=Beta-D-glucoside glucohydrolase I; AltName: Full=Cellobiase I; AltName: Full=Gentiobiase I && PF01915:Glycosyl hydrolase family 3 C-terminal domain PF14310:Fibronectin type III-like domain PF07691:PA14 domain PF00933:Glycosyl hydrolase family 3 N terminal domain |
| Lachesis_group0__13_contigs__l.g5464  | 1417.77  | 9700.339 | -2.77445 | 1.82E-05 | 0.000711 | 873  | - && - && PF00652:Ricin-type beta-trefoil lectin domain                                                                                                                                                                                                                                                                                       |
| Lachesis_group0__13_contigs__l.g7290  | 36.74538 | 252.7586 | -2.78295 | 1.36E-06 | 8.86E-05 | 1614 | - && P51687.2 RecName: Full=Sulfite oxidase, mitochondrial; Flags: Precursor && PF03404:Mo-co oxidoreductase dimerisation domain PF00174:Oxidoreductase molybdopterin binding domain                                                                                                                                                          |
| Lachesis_group0__13_contigs__l.g6301  | 125.2177 | 866.453  | -2.79126 | 1.18E-05 | 0.000499 | 831  | - && O13871.1 RecName: Full=Uncharacterized methyltransferase C1B3.06c && PF13847:Methyltransferase domain                                                                                                                                                                                                                                    |
| Lachesis_group0__13_contigs__l.g10522 | 257.1241 | 1781.351 | -2.79274 | 4.33E-06 | 0.000229 | 1503 | - && O74187.1 RecName: Full=Aldehyde dehydrogenase; Short=ALDDH; Short=ALDH && PF00171:Aldehyde dehydrogenase family                                                                                                                                                                                                                          |
| Lachesis_group0__13_contigs__l.g4409  | 17.9207  | 126.0201 | -2.81875 | 0.00048  | 0.008295 | 4737 | - && G3Y416.1 RecName: Full=Cytochrome P450 monooxygenase yanC; AltName: Full=Yanuthone D                                                                                                                                                                                                                                                     |



|                                       |          |          |          |          |          |      |                                                                                                                                                                                                                                                                                                          |
|---------------------------------------|----------|----------|----------|----------|----------|------|----------------------------------------------------------------------------------------------------------------------------------------------------------------------------------------------------------------------------------------------------------------------------------------------------------|
|                                       |          |          |          |          |          |      | synthesis protein C; Flags: Precursor && PF00067:Cytochrome P450 PF07993:Male sterility protein PF00501:AMP-binding enzyme                                                                                                                                                                               |
| Lachesis_group0__13_contigs__l.g11056 | 52.2422  | 372.1217 | -2.83108 | 6.98E-10 | 1.59E-07 | 1233 | - && Q4WAZ6.1 RecName: Full=Multifunctional cytochrome P450 monooxygenase af510; AltName: Full=Fumagillin bioynthesis cluster P450 monooxygenase; Short=Fma-P450 && PF00067:Cytochrome P450                                                                                                              |
| Lachesis_group0__13_contigs__l.g5508  | 76.15057 | 543.9732 | -2.8372  | 7.02E-06 | 0.000331 | 423  | - && P33207.2 RecName: Full=3-oxoacyl-[acyl-carrier-protein] reductase, chloroplastic; AltName: Full=3-ketoacyl-acyl carrier protein reductase; Flags: Precursor && PF00106:short chain dehydrogenase                                                                                                    |
| Lachesis_group0__13_contigs__l.g1462  | 168.321  | 1216.209 | -2.85301 | 2.08E-06 | 0.000127 | 1110 | - && O94564.1 RecName: Full=Zinc-type alcohol dehydrogenase-like protein C1773.06c && PF00107:Zinc-binding dehydrogenase                                                                                                                                                                                 |
| Lachesis_group0__13_contigs__l.g9559  | 1430.563 | 10648.38 | -2.89601 | 3.50E-05 | 0.001153 | 8046 | - && P04323.1 RecName: Full=Retrovirus-related Pol polyprotein from transposon 17.6; Includes: RecName: Full=Protease; Includes: RecName: Full=Reverse transcriptase; Includes: RecName: Full=Endonuclease && PF00665:Integrase core domain PF00078:Reverse transcriptase (RNA-dependent DNA polymerase) |
| Lachesis_group0__13_contigs__l.g5019  | 104.2864 | 787.9412 | -2.91722 | 9.50E-07 | 6.71E-05 | 1689 | - && Q47944.1 RecName: Full=L-sorbose 1-dehydrogenase; Short=SDH && PF00732:GMC oxidoreductase PF05199:GMC oxidoreductase                                                                                                                                                                                |

|                                      |          |          |          |          |          |      |                                                                                                                                                                                                                                                                                                                                                                                                                                                                                                                                                                                                                |
|--------------------------------------|----------|----------|----------|----------|----------|------|----------------------------------------------------------------------------------------------------------------------------------------------------------------------------------------------------------------------------------------------------------------------------------------------------------------------------------------------------------------------------------------------------------------------------------------------------------------------------------------------------------------------------------------------------------------------------------------------------------------|
| Lachesis_group0__13_contigs__l.g8159 | 104.6259 | 804.8152 | -2.94403 | 8.18E-08 | 9.61E-06 | 1365 | - && P23262.4 RecName: Full=Salicylate hydroxylase; AltName: Full=Salicylate 1-monooxygenase && PF01494:FAD binding domain                                                                                                                                                                                                                                                                                                                                                                                                                                                                                     |
| Lachesis_group0__13_contigs__l.g4685 | 789.3318 | 6127.511 | -2.9566  | 1.88E-06 | 0.000116 | 549  | - && P0AE54.1 RecName: Full=Putative peroxiredoxin bcp; AltName: Full=Bacterioferritin comigratory protein; AltName: Full=Thioredoxin reductase >P0AE53.1 RecName: Full=Putative peroxiredoxin bcp; AltName: Full=Bacterioferritin comigratory protein; AltName: Full=Thioredoxin reductase >P0AE52.1 RecName: Full=Putative peroxiredoxin bcp; AltName: Full=Bacterioferritin comigratory protein; AltName: Full=Thioredoxin reductase >P0AE55.1 RecName: Full=Putative peroxiredoxin bcp; AltName: Full=Bacterioferritin comigratory protein; AltName: Full=Thioredoxin reductase && PF00578:AhpC/TSA family |
| Lachesis_group0__13_contigs__l.g268  | 159.695  | 1249.725 | -2.96826 | 2.95E-09 | 5.40E-07 | 945  | - && O74959.1 RecName: Full=Uncharacterized oxidoreductase C736.13 && PF00106:short chain dehydrogenase                                                                                                                                                                                                                                                                                                                                                                                                                                                                                                        |
| Lachesis_group0__13_contigs__l.g6318 | 79.24175 | 628.3281 | -2.98681 | 3.73E-08 | 5.07E-06 | 645  | - && B0DK57.1 RecName: Full=Solute carrier family 25 member 38 homolog && PF00153:Mitochondrial carrier protein                                                                                                                                                                                                                                                                                                                                                                                                                                                                                                |
| Lachesis_group0__13_contigs__l.g7178 | 116.3223 | 946.5209 | -3.02413 | 1.64E-07 | 1.71E-05 | 2577 | - && A1CA51.1 RecName: Full=Probable beta-glucosidase I; AltName: Full=Beta-D-glucoside glucohydrolase I; AltName: Full=Cellobiase I; AltName: Full=Gentiobiase I && PF00933:Glycosyl                                                                                                                                                                                                                                                                                                                                                                                                                          |

|                                       |          |          |          |          |          |      |                                                                                                                                                                                                                                                                                                               |
|---------------------------------------|----------|----------|----------|----------|----------|------|---------------------------------------------------------------------------------------------------------------------------------------------------------------------------------------------------------------------------------------------------------------------------------------------------------------|
|                                       |          |          |          |          |          |      | hydrolase family 3 N terminal domain PF01915:Glycosyl hydrolase family 3 C-terminal domain PF14310:Fibronectin type III-like domain                                                                                                                                                                           |
| Lachesis_group0__13_contigs__l.g2228  | 149.4514 | 1221.837 | -3.03146 | 2.48E-05 | 0.000912 | 1173 | - && Q01752.1 RecName: Full=Aryl-alcohol dehydrogenase [NADP(+)]; Short=AAD && PF00248:Aldo/keto reductase family                                                                                                                                                                                             |
| Lachesis_group0__13_contigs__l.g5099  | 27.39714 | 226.5965 | -3.0474  | 7.65E-08 | 9.09E-06 | 1377 | - && P75791.1 RecName: Full=Uncharacterized protein YbiU && PF07350:Protein of unknown function (DUF1479)                                                                                                                                                                                                     |
| Lachesis_group0__13_contigs__l.g10575 | 1073.487 | 9211.816 | -3.1013  | 1.21E-10 | 3.32E-08 | 3297 | - && Q9XF67.1 RecName: Full=3-phosphoinositide-dependent protein kinase 1; Short=AtPDK1 && PF00069:Protein kinase domain                                                                                                                                                                                      |
| Lachesis_group0__13_contigs__l.g1711  | 27.7631  | 240.3467 | -3.11318 | 6.55E-05 | 0.001892 | 1452 | - && B7ID58.1 RecName: Full=8-amino-7-oxononanoate synthase; Short=AONS; AltName: Full=7-keto-8-amino-pelargonic acid synthase; Short=7-KAP synthase; Short=KAPA synthase; AltName: Full=8-amino-7-ketopelargonate synthase; AltName: Full=Alpha-oxoamine synthase && PF00155:Aminotransferase class I and II |
| Lachesis_group0__13_contigs__l.g10566 | 14.57754 | 126.0447 | -3.11362 | 0.000482 | 0.008303 | 798  | - && - && PF13417:Glutathione S-transferase, N-terminal domain                                                                                                                                                                                                                                                |
| Lachesis_group0__13_contigs__l.g5285  | 4.45657  | 39.334   | -3.14169 | 0.002524 | 0.02668  | 432  | - && Q1E8D2.1 RecName: Full=Heat-stable 19 kDa antigen; AltName: Full=CS-AG; Flags: Precursor && PF07249:Cerato-platanin                                                                                                                                                                                      |

|                                      |          |          |          |          |          |      |                                                                                                                                                                                                                                                                                                                                                                                                                                                |
|--------------------------------------|----------|----------|----------|----------|----------|------|------------------------------------------------------------------------------------------------------------------------------------------------------------------------------------------------------------------------------------------------------------------------------------------------------------------------------------------------------------------------------------------------------------------------------------------------|
| Lachesis_group0__13_contigs__l.g9199 | 1140.138 | 10414.39 | -3.19135 | 6.13E-09 | 1.03E-06 | 435  | - && P0CW95.1 RecName: Full=Heat-stable 19 kDa antigen; AltName: Full=Coccidioides-specific antigen; Short=CS antigen; Short=CS-AG; AltName: Full=Precipitin antigen; AltName: Full=TP-AG; Flags: Precursor >E9CX44.1 RecName: Full=Heat-stable 19 kDa antigen; AltName: Full=Coccidioides-specific antigen; Short=CS antigen; Short=CS-AG; AltName: Full=Precipitin antigen; AltName: Full=TP-AG; Flags: Precursor && PF07249: Ceratoplatanin |
| Lachesis_group0__13_contigs__l.g3453 | 5.634859 | 52.23147 | -3.21443 | 8.62E-05 | 0.002334 | 600  | - && - && PF01185: Fungal hydrophobin                                                                                                                                                                                                                                                                                                                                                                                                          |
| Lachesis_group0__13_contigs__l.g654  | 47.95509 | 445.2973 | -3.21499 | 1.84E-06 | 0.000114 | 2025 | - && Q54DY9.1 RecName: Full=Probable mitochondrial chaperone BCS1-B; AltName: Full=BCS1-like protein 2 && PF00004: ATPase family associated with various cellular activities (AAA) PF08740: BCS1 N terminal                                                                                                                                                                                                                                    |
| Lachesis_group0__13_contigs__l.g1814 | 16.44561 | 155.7323 | -3.23995 | 6.87E-09 | 1.14E-06 | 2169 | - && P94593.2 RecName: Full=Uncharacterized ATP-dependent helicase YwqA && PF00176: SNF2 family N-terminal domain                                                                                                                                                                                                                                                                                                                              |
| Lachesis_group0__13_contigs__l.g4968 | 8.10214  | 76.5187  | -3.24427 | 2.47E-05 | 0.000912 | 597  | - && - && PF05368: NmrA-like family                                                                                                                                                                                                                                                                                                                                                                                                            |
| Lachesis_group0__13_contigs__l.g9674 | 26.18666 | 249.7617 | -3.25343 | 1.59E-06 | 9.96E-05 | 3369 | - && Q4WRH9.1 RecName: Full=Probable alpha/beta-glucosidase agdC; Flags: Precursor >B0XNL6.1 RecName: Full=Probable alpha/beta-glucosidase agdC; Flags: Precursor && PF01055: Glycosyl hydrolases family 31 PF13802: Galactose mutarotase-like PF16863: N-                                                                                                                                                                                     |

|                                      |          |          |          |          |          |      |                                                                                                                                                                                                                                                                                                                                                                                                                                                                  |
|--------------------------------------|----------|----------|----------|----------|----------|------|------------------------------------------------------------------------------------------------------------------------------------------------------------------------------------------------------------------------------------------------------------------------------------------------------------------------------------------------------------------------------------------------------------------------------------------------------------------|
|                                      |          |          |          |          |          |      | terminal barrel of NtMGAM and CtMGAM, maltase-glucoamylase                                                                                                                                                                                                                                                                                                                                                                                                       |
| Lachesis_group0__13_contigs__l.g60   | 46.85916 | 456.43   | -3.28461 | 6.20E-07 | 4.60E-05 | 1077 | - && Q4WBW4.1 RecName: Full=Probable acetylxy lan esterase A; Flags: Precursor && PF10503:Esterase PHB depolymerase                                                                                                                                                                                                                                                                                                                                              |
| Lachesis_group0__13_contigs__l.g5942 | 130.2114 | 1286.377 | -3.30514 | 1.91E-10 | 4.64E-08 | 1047 | - && P43549.1 RecName: Full=Uncharacterized membrane protein YFL054C && PF00230:Major intrinsic protein                                                                                                                                                                                                                                                                                                                                                          |
| Lachesis_group0__13_contigs__l.g451  | 138.7053 | 1411.333 | -3.34694 | 6.95E-16 | 4.85E-13 | 1038 | - && Q9UT59.1 RecName: Full=Putative uncharacterized oxidoreductase C513.07 && PF01370:NAD dependent epimerase/dehydratase family                                                                                                                                                                                                                                                                                                                                |
| Lachesis_group0__13_contigs__l.g8243 | 233.2982 | 2391.83  | -3.35791 | 3.29E-06 | 0.000184 | 882  | - && - && PF00652:Ricin-type beta-trefoil lectin domain                                                                                                                                                                                                                                                                                                                                                                                                          |
| Lachesis_group0__13_contigs__l.g992  | 9.224412 | 94.8704  | -3.36239 | 2.53E-07 | 2.39E-05 | 1593 | - && B8NHY4.1 RecName: Full=O-methylsterigmatocystin oxidoreductase; Short=OMST oxidoreductase; AltName: Full=Aflatoxin B synthase; AltName: Full=Aflatoxin biosynthesis protein Q; AltName: Full=Cytochrome P450 64 >P0CT93.1 RecName: Full=O-methylsterigmatocystin oxidoreductase; Short=OMST oxidoreductase; AltName: Full=Aflatoxin B synthase; AltName: Full=Aflatoxin biosynthesis protein Q; AltName: Full=Cytochrome P450 64 && PF00067:Cytochrome P450 |

|                                      |          |          |          |          |          |      |                                                                                                                                                                                                                                                                                                                                                                                     |
|--------------------------------------|----------|----------|----------|----------|----------|------|-------------------------------------------------------------------------------------------------------------------------------------------------------------------------------------------------------------------------------------------------------------------------------------------------------------------------------------------------------------------------------------|
| Lachesis_group0__13_contigs__l.g8595 | 1536.997 | 15911.45 | -3.37187 | 2.59E-06 | 0.000149 | 882  | - && A3PXS9.1 RecName: Full=Uncharacterized oxidoreductase Mjls_1918 && PF00248:Aldo/keto reductase family                                                                                                                                                                                                                                                                          |
| Lachesis_group0__13_contigs__l.g5121 | 640.61   | 6672.492 | -3.38075 | 1.04E-15 | 6.80E-13 | 813  | - && Q9ZNN8.1 RecName: Full=L-2,3-butanediol dehydrogenase; Short=L-BDH; AltName: Full=(S,S)-butanediol dehydrogenase; AltName: Full=Diacetyl reductase [(S)-acetoin forming] && PF00106:short chain dehydrogenase                                                                                                                                                                  |
| Lachesis_group0__13_contigs__l.g6565 | 13.94856 | 145.6365 | -3.39004 | 5.64E-06 | 0.000279 | 2814 | - && Q0CI48.2 RecName: Full=Beta-mannosidase A; AltName: Full=Mannanase A; Short=Mannase A; Flags: Precursor && -                                                                                                                                                                                                                                                                   |
| Lachesis_group0__13_contigs__l.g1739 | 139.0493 | 1461.017 | -3.39377 | 1.82E-09 | 3.80E-07 | 1803 | - && Q00922.1 RecName: Full=Alcohol oxidase; Short=AO; Short=AOX; AltName: Full=Methanol oxidase; Short=MOX && PF05199:GMC oxidoreductase PF00732:GMC oxidoreductase                                                                                                                                                                                                                |
| Lachesis_group0__13_contigs__l.g4108 | 14.38833 | 152.9878 | -3.40841 | 1.03E-06 | 7.15E-05 | 657  | - && - && PF00583:Acetyltransferase (GNAT) family                                                                                                                                                                                                                                                                                                                                   |
| Lachesis_group0__13_contigs__l.g6317 | 714.7119 | 7938.483 | -3.47337 | 1.42E-06 | 9.11E-05 | 1269 | - && Q9DBL1.1 RecName: Full=Short/branched chain specific acyl-CoA dehydrogenase, mitochondrial; Short=SBCAD; AltName: Full=2-methyl branched chain acyl-CoA dehydrogenase; Short=2-MEBCAD; AltName: Full=2-methylbutyryl-coenzyme A dehydrogenase; Short=2-methylbutyryl-CoA dehydrogenase; Flags: Precursor && PF00441:Acyl-CoA dehydrogenase, C-terminal domain PF02770:Acyl-CoA |

|                                      |          |          |          |          |          |      |                                                                                                                                                                                                                                                                      |
|--------------------------------------|----------|----------|----------|----------|----------|------|----------------------------------------------------------------------------------------------------------------------------------------------------------------------------------------------------------------------------------------------------------------------|
|                                      |          |          |          |          |          |      | dehydrogenase, middle domain PF02771:Acyl-CoA dehydrogenase, N-terminal domain                                                                                                                                                                                       |
| Lachesis_group0__13_contigs__l.g5245 | 482.3715 | 5399.433 | -3.48447 | 2.79E-14 | 1.39E-11 | 2412 | - && G0SGU4.1 RecName: Full=Formate dehydrogenase; Short=FDH; AltName: Full=NAD-dependent formate dehydrogenase && PF00389:D-isomer specific 2-hydroxyacid dehydrogenase, catalytic domain PF02826:D-isomer specific 2-hydroxyacid dehydrogenase, NAD binding domain |
| Lachesis_group0__13_contigs__l.g150  | 18.46067 | 208.4003 | -3.49629 | 5.79E-08 | 7.04E-06 | 1164 | - && Q04835.1 RecName: Full=Uncharacterized membrane protein YMR253C && PF00892:EamA-like transporter family                                                                                                                                                         |
| Lachesis_group0__13_contigs__l.g808  | 26.48723 | 313.3431 | -3.56556 | 2.58E-08 | 3.69E-06 | 1584 | - && - && PF12937:F-box-like                                                                                                                                                                                                                                         |
| Lachesis_group0__13_contigs__l.g5817 | 1467.393 | 18381.77 | -3.64697 | 3.06E-09 | 5.42E-07 | 5838 | - && P41820.1 RecName: Full=Brefeldin A resistance protein && PF06422:CDR ABC transporter PF00005:ABC transporter PF01061:ABC-2 type transporter PF00656:Caspase domain PF14510:ABC-transporter extracellular N-terminal                                             |
| Lachesis_group0__13_contigs__l.g8740 | 1584.595 | 20501.44 | -3.6935  | 6.86E-17 | 5.12E-14 | 1641 | - && - && PF01936:NYN domain                                                                                                                                                                                                                                         |
| Lachesis_group0__13_contigs__l.g2012 | 11.64406 | 155.4319 | -3.74127 | 1.65E-07 | 1.71E-05 | 2025 | - && Q0CTV2.1 RecName: Full=Probable alpha-L-arabinofuranosidase A; Short=ABF A; Short=Arabinosidase A; Flags: Precursor && PF06964:Alpha-L-arabinofuranosidase C-terminus                                                                                           |

|                                       |          |          |          |          |          |      |                                                                                                                                                                                                                                                                                                                                                                                                                 |
|---------------------------------------|----------|----------|----------|----------|----------|------|-----------------------------------------------------------------------------------------------------------------------------------------------------------------------------------------------------------------------------------------------------------------------------------------------------------------------------------------------------------------------------------------------------------------|
| Lachesis_group0__13_contigs__l.g10523 | 272.0105 | 3846.091 | -3.82181 | 2.60E-11 | 9.05E-09 | 1503 | - && O74187.1 RecName: Full=Aldehyde dehydrogenase; Short=ALDDH; Short=ALDH && PF00171:Aldehyde dehydrogenase family                                                                                                                                                                                                                                                                                            |
| Lachesis_group0__13_contigs__l.g4683  | 32.30376 | 466.6105 | -3.85257 | 7.64E-11 | 2.22E-08 | 2316 | - && Q9Y6Z9.1 RecName: Full=Sorbose reductase sou1; AltName: Full=Sorbitol utilization protein sou1 && PF13561:Enoyl-(Acyl carrier protein) reductase PF00106:short chain dehydrogenase                                                                                                                                                                                                                         |
| Lachesis_group0__13_contigs__l.g359   | 14.57097 | 215.2181 | -3.88971 | 5.81E-07 | 4.47E-05 | 960  | - && O59952.1 RecName: Full=Lipase; AltName: Full=Triacylglycerol lipase; Flags: Precursor && PF01764:Lipase (class 3)                                                                                                                                                                                                                                                                                          |
| Lachesis_group0__13_contigs__l.g4765  | 130.7802 | 2013.551 | -3.94534 | 1.42E-13 | 6.76E-11 | 1059 | - && Q8K2T1.1 RecName: Full=NmrA-like family domain-containing protein 1 && PF05368:NmrA-like family                                                                                                                                                                                                                                                                                                            |
| Lachesis_group0__13_contigs__l.g9938  | 1169.427 | 19460.47 | -4.05661 | 1.68E-23 | 3.50E-20 | 3204 | - && Q9Y8G7.1 RecName: Full=Bifunctional cytochrome P450/NADPH--P450 reductase; AltName: Full=Cytochrome P450foxy; AltName: Full=Fatty acid omega-hydroxylase; AltName: Full=P450foxy; Includes: RecName: Full=Cytochrome P450 505; Includes: RecName: Full=NADPH--cytochrome P450 reductase && PF00067:Cytochrome P450 PF00258:Flavodoxin PF00667:FAD binding domain PF00175:Oxidoreductase NAD-binding domain |



|                                      |          |          |          |          |          |      |                                                                                                                                                                                                                                                                                                                                                                                                                                                                                                                                                                       |
|--------------------------------------|----------|----------|----------|----------|----------|------|-----------------------------------------------------------------------------------------------------------------------------------------------------------------------------------------------------------------------------------------------------------------------------------------------------------------------------------------------------------------------------------------------------------------------------------------------------------------------------------------------------------------------------------------------------------------------|
| Lachesis_group0__13_contigs__l.g6980 | 241.5895 | 4329.065 | -4.16352 | 5.07E-30 | 2.65E-26 | 1572 | - && Q0CJ61.1 RecName: Full=Efflux pump atB; AltName: Full=Terreic acid biosynthesis cluster protein B && PF07690:Major Facilitator Superfamily                                                                                                                                                                                                                                                                                                                                                                                                                       |
| Lachesis_group0__13_contigs__l.g6766 | 130.0752 | 2359.34  | -4.18081 | 9.92E-10 | 2.16E-07 | 2499 | - && I2C092.1 RecName: Full=Beta-mannosidase B; AltName: Full=Mannanase B; Short=Mannase B && -                                                                                                                                                                                                                                                                                                                                                                                                                                                                       |
| Lachesis_group0__13_contigs__l.g1398 | 230.1016 | 4624.51  | -4.3289  | 1.06E-12 | 4.62E-10 | 1689 | - && S0EEY7.1 RecName: Full=Efflux pump FUS6; AltName: Full=Fusarin biosynthesis protein 6 && PF07690:Major Facilitator Superfamily                                                                                                                                                                                                                                                                                                                                                                                                                                   |
| Lachesis_group0__13_contigs__l.g1951 | 13.02638 | 266.1563 | -4.35292 | 2.66E-07 | 2.45E-05 | 459  | - && - && PF16850:Peptidase inhibitor I66                                                                                                                                                                                                                                                                                                                                                                                                                                                                                                                             |
| Lachesis_group0__13_contigs__l.g9406 | 37.80871 | 814.4248 | -4.42969 | 5.46E-15 | 3.36E-12 | 2289 | - && Q4WFI6.1 RecName: Full=Probable exo-1,4-beta-xylosidase bxlB; AltName: Full=1,4-beta-D-xylan xylohydrolase bxlB; AltName: Full=Beta-xylosidase bxlB; AltName: Full=Xylobiase bxlB; Flags: Precursor >B0Y0I4.1 RecName: Full=Probable exo-1,4-beta-xylosidase bxlB; AltName: Full=1,4-beta-D-xylan xylohydrolase bxlB; AltName: Full=Beta-xylosidase bxlB; AltName: Full=Xylobiase bxlB; Flags: Precursor && PF01915:Glycosyl hydrolase family 3 C-terminal domain PF14310:Fibronectin type III-like domain PF00933:Glycosyl hydrolase family 3 N terminal domain |
| Lachesis_group0__13_contigs__l.g7910 | 123.7557 | 2918.18  | -4.55949 | 3.05E-09 | 5.42E-07 | 1713 | - && P49374.1 RecName: Full=High-affinity glucose transporter && PF00083:Sugar (and other) transporter                                                                                                                                                                                                                                                                                                                                                                                                                                                                |

|                                      |          |          |          |          |          |      |                                                                                                                                                                                                            |
|--------------------------------------|----------|----------|----------|----------|----------|------|------------------------------------------------------------------------------------------------------------------------------------------------------------------------------------------------------------|
| Lachesis_group0__13_contigs__l.g6349 | 75.40546 | 2729.088 | -5.17758 | 4.51E-25 | 1.18E-21 | 1521 | - && P0CP76.1 RecName: Full=Chitin deacetylase;<br>Flags: Precursor && PF01522:Polysaccharide deacetylase                                                                                                  |
| Lachesis_group0__13_contigs__l.g6193 | 4.983045 | 186.2932 | -5.21478 | 5.13E-18 | 5.96E-15 | 1662 | - && A2QEQ6.1 RecName: Full=Beta-glucuronidase;<br>Short=GlcAase; AltName: Full=Beta-D-glucuronoside glucuronosohydrolase; Flags: Precursor && PF16862:Glycosyl hydrolase family 79 C-terminal beta domain |
| Lachesis_group0__13_contigs__l.g5319 | 75.62431 | 3002.786 | -5.311   | 4.38E-19 | 6.54E-16 | 2592 | - && Q00922.1 RecName: Full=Alcohol oxidase;<br>Short=AO; Short=AOX; AltName: Full=Methanol oxidase; Short=MOX && PF05199:GMC oxidoreductase PF00732:GMC oxidoreductase                                    |
| Lachesis_group0__13_contigs__l.g1604 | 21.07942 | 1148.626 | -5.76773 | 1.29E-38 | 1.35E-34 | 3090 | - && - && PF15979:Glycosyl hydrolase family 115                                                                                                                                                            |

**Log<sub>2</sub>Fold change:** values of transcripts upregulated in Brij 30 addition is represented by positive numbers and downregulated is represented by negative numbers.

Padj: adjust *P*-value

**Table S5** Primers used for qPCR

| Primer    | Sequence (5'-3')      | Product (bp) | NR description                        |
|-----------|-----------------------|--------------|---------------------------------------|
| g2225-F1  | CGCGACCAGATTGTCATTGC  | 187          | Aryl-alcohol dehydrogenase [NADP(+)]  |
| g2225-R1  | TTTCGTAGTCCCACCAGTGC  |              |                                       |
| g7729-F1  | CCAAGCAAAGGGGAGGTTCT  | 169          | Dehydrogenase                         |
| g7729-R1  | CTACAGCAAGCGAGGTGACA  |              |                                       |
| g9953-F1  | GCCCAATGAGTTGCACTTCG  | 184          | Cytochrome P450 monooxygenase         |
| g9953-R1  | CGAGAAGAGCGGGATCATGG  |              |                                       |
| g8591-F1  | CTGTCCAGGTTCCCTTCGTCC | 140          | Ubiquitin carboxyl-terminal hydrolase |
| g8591-R1  | CTCGTTGCTTGGTGATGCTG  |              |                                       |
| g10392-F2 | GAGAAGAAGGGGACGAAGGC  | 197          | Glycosyl hydrolase family             |
| g10392-R2 | GGGACAAGCTGTGCGTAGAA  |              |                                       |
| g8359-F1  | ACCTCAAGGACACGCAGAAC  | 143          | Dicarbonyl/L-xylulose reductase       |
| g8359-R1  | AACGTCGAAAGCGTCTCTGT  |              |                                       |
| g6290-F1  | TTGAACCCCAAGGCTAACCG  | 152          | Actin                                 |
| g6290-R1  | GAGACACCATCACCGGAGTC  |              |                                       |

### Sequence information of functional genes

>Lachesis\_group0\_\_13\_contigs\_\_1.g2225

ATGAGCCTCTTCGCAGCACCCCTGAACCCAAGACCAAGCTCGGTATCCACCGTAAACTTGCTCCCACCGCTGGCGTCCATGTCTCGCCCATCCAGCTCGGTGCAATGAGCATCGGCGACAAGTGGGCGCAGTACGGCATGGGTGCGATGGACAAGGAGAGTAGCTTCAAGCTGCTCGATGCCTTCTACGAGGCGGGTGGTAACTTCATCGATACCGCGAATGGATACCAGGATGAGAGCTCTGAAGAGTTCCTCGGCGAGTGGATGGAGACACGCGGCATCCGCGACCAGATTGTCATTGCAACCAAGTATTCGAGCAACTTCAAGCGCGGAGCAAAGGACATCTCACAGAAAGGCACCTACGTCGGCAATCACCTGAAATCGCTGCACCTCTCCGTGGAAGCTTCGCTCAAGAAGCTCCGCACAGACTACATCGACATTCTGTACGTGCACTGGTGGGACTACGAAACGAGCATCGAAGAGGTCATGAACGGCCTGCACCACCTTGTTGCCAGGGCAAAGTGCTCTACTTGGGAATTCTTGACACGCCCCGATGGATTGTGCCAAAGCGAACAGCTACGCGCGATACAACGGCAAGACGCCCTTCATCATCTACCAGGGCGCATGGAACGTCATGCAGCGCGACTTCGAGCGCGAGATCATTCCCCTTGCGCGCAGCGAAGGTATGGCACTCGCACCATGGAACGTCCTTGACAGGAGGCAAGATCCGCACGGATGCAGAGGAGCAGAGCGGCGCGAGACGGGGGAGCTCGGCCGTGCGACCTTCAACCCAACTGGGAGCGCACCGAAAACGAGCGCAAGGTCTGTGCCGCACTCGAGAAGGTTGCAGCAGAGGTTGGCACGAAGAGTATCACTGCCGTGGCAATCGCGTATGTGATGCAGAAGACGCCATACGTGTTCCCCATCGTCGGGGGGCGCAAGGTTCGAGCACCTGAACGACAAATCGAGGCACTCAGCATCGCTCTACGCCCCGAGCAAATCGCGTTCATAGAGAGCATTCTACCCTTCGACTCTGGCTTCCCTTCGAACCTTTGTTGTGAGTGCTCGGTTTTCTGTCTTCACGGCTCTTCTGGTCCTGCGTCTTCAGTCGAGATGTATGCGCTCGGGAACAATGATGCTGATGATGATGTTTTTCCACAGGGTGACGGGTCGGACTATATCCATATCTACAAGGCGTCCGGGCACTTTGTGAAGTGGCCCCAGACACAGGCCATTCGCCCCGGCTGCGAATTAG

>Lachesis\_group0\_\_13\_contigs\_\_1.g7729

ATGTCCATTACCGTCCCGACAAAACATAAGGTCCTTGTCATACCTGTGGAACACGCCCCGTTTCGAGGTCCAGGAAATCGAAGTAACCAAGCCAAGCAAAGGGGAGGTCTTGTTTCGTGCAGAGAGCGTCGGCCTCAACCCCGCCGACTGGCTGGTCCGCGAGTTCAACCCGTTCAAATGGGCTCATCCCTGTATTCTTGGCTGTGAAGCCGCCGGAACCGTCGTGGAGCTTGGCGAAGGTGTCACCTCGCTTGCTGTAGGCGACAAAGTGATGCACCCTGCGTGGAACGGCGATGGGTACACCGCGTTCAAGCAGTACAACACGACTCTCGCAGATGTCTGCGTGAAGGTACCTTCCAACCTTACTATTGACCAAGCGGCGTCCATCCCGTTAGCGTTTAAACAGGCCCTCGTCGGATTATACTGCCCCCCCAAAACCGTGGCGGCGCGGGCCTCGCGCCCTTCTGGAAGGACGGCGGACGCGGTAAATACGCCGGACAGCCCATCCTCATCCTCGGCGGCTCCTCAGGTGTTGCACAACTGCGATCCAATTGCGCGCATCTCCGGCTTCTCGCCTATCATCACGACTGCTTCACTCAAGAACACCGACCTACTCACGTCGCTCGGTGCGACGCACGTCCTTGACC

GCAACCTCTCAGACGAGGCGTTTGCCGCCGCCGTGCGCGGTATCATAGACCCAGCATCACTGCGCGTGGTCTTCGACAGCATGTCCGACCCAGCGATCCAACGCGCGG  
CGTTCGAGCTGCTCGCGCCCCGGGGGTCGTTTCATCGGCTGCTCGGGCGGCCGCAACCTGACCCCGGAGCAGCACGCGAGCAAGGAGAAGCAGTTCGTCTTTCCGTAT  
GGGAGCCCGTACTGGGAGGATCGCCGGGAGCTGTGCGCCTCGTTCTTCAAGCAGATGCCTGCGTTCGTGTAGAGCGGGGAGCTCAAGCCGAACAAGGTGGAAGTCCT  
TCCTGGTGGATGGGATGGCGCTATCGCTGGGTGAAGAGGATGAAGGAGACTGGCGTGAGCGCCGTGAACTAGTCGTCCATCCTCAAGAGACGGCCTAG

>Lachesis\_group0\_\_13\_contigs\_\_1.g9953

ATGCCCTGGACACAGCTTGGGATCGTGCAGACCCTGTTCGTGCGGCTCGCCGTGCATCGTCTCTGGATCATTATCTACAATGCATTCTTCCACCCGCTCGCGGCGTTCCC  
CGGGCCAGTGCTGGCGAAGGTGACTACCTTGTGGCGGGCGTACGTCGAGCTGTACGGTACCGAGAACTTTACGACCGACACGCTCGTGGCGTTGCACGCCCCGATATGG  
GGACGTGGTGCGGTTCGCGCCCAATGAGTTGCACTTCGCAACCCCGCAGGCGTACCACGACATATAACAACGCGAAGAACCGGTGGGACAAGGACGCGAAGCTGTAC  
AACGCCCTGCGCGGCTCCGACGGGCATGCCTCCTTCCACCTCGCGCGCTTCCGTGACGCGAAGCAGCGCCGCGAGCCCATGATCCCGCTCTTCTCGCGCTCGTCGATC  
ATGAGCATGCAGCACCTGCTCAACGAGAACCTCGACACACTCTGCGCGCACCTCGCGCGGCGCGACGCGGCAGGCGAGACGACGGACCTCCTCCTCGCGATGCGCG  
CCTTCGCGCTCGACACGGTGACCGCGTTCTGCTTCGGCACGCCCTCCGTGCACGCGCTCTCCGCGCCGGGCTTCGACGCGCCCCCTCGGGCGCGTCATGACGCTCATCAT  
GACGTTTCGTGCCCTCGCTCAAGCACTTCCCCGTCCTCCACTGGATGCTCAATCACATGCCGCCCCGCGCTCGTGCGCGCCGCGCGCCCCGAGCTGACGGTGTCTACGAG  
TTCCACGACATAATCGCGAAGCAGGTGACACGCGCTGAACGACCCCGACGCGCTCGCCGCGCGCGCACCCGACGGTCTACCACGCGCTTTTGACACAGCCGCA  
CGCGTCCGCGCACACGAGCAGCGGCACGCGCGGCCCTGCGCTGAGCTTCCGCGAGCTGTGCGCCGAGGCGCACCTGCTCGCGTTTCGCGGGCACGGACACGGCGAGC  
AACACGCTCACGTACGGCGTGACGAGCGTGCTCAGCGACGCGCGCTGCACCGGACGCTCGTCGCGGCCCTGCGCGACGCGTGGCCTGATCTCGCGAGCCCCGCCGCG  
GTACGAGGAGCTCGAGAAGGTGCCGTACTTGAAAGCGGTTCGTGCGGGAGTCTCTCCGTGCTGACGGCGTGCTCTCGCCCATGGACCGCGTCGTCCCCCGCGAGG  
GCGCGGTTCGTGCGGGGTCGTTTCATCCCCGGCGGCACCGTCGTGGGCATCAGCAACATCTTCGTGCACCTCTCGCCCCGAAATCTTCCACGACCCGCTCGTGTTCCTCCC  
TGAGCGCTGGCTCGCAGACGACGCGGACACGCTCGAGCCGTGGCTCGTCGCGTTCTCCAAGGGCCCCGCGAGCTGTCTCGGGATCAACTTGGGCTACTGTGAGCTCTT  
CCTGCTCTTCGCACACCTGTTTCAGGCGATTTCGAGCTGTCTCTCGTCGACGTCAGCGCGAAGGACATGGTCTGGGACGAGTGCTACCTGCCGCACTACGTCCGCCCGTCG  
CTGCAGATCCGCACGAAGCCCGTCGACTCGTGA

>Lachesis\_group0\_\_13\_contigs\_\_1.g8591

ATGGCGAACCCAAATCAACAGTACTCGCATCCCGGTCCATCCTACTATCATACACCACCCCGCCGCTCAGTTTACCTACGCTCCTGGCCCAGGTGGTATGGCTTACTA  
TCCATATCCCATGAACCCTTTGAACGGACATAGTCCGCCTACCAGCCCGCCTCGCCAAGAATGAACGGAGGTGGTCGCGGGGGGTATCATCCACACCGAGCAGGGG

GGCCCAGCTACCATCATTTCACCATGTCCCACCACCGCACTACCTGCCGCCGCAACCTATGCCAGCTTCTCCAGTCCCTCCAGGGAGTCCTTACGCGCACCCACAAAA  
ATACCCCCCACATCCACAGCAAATGCCATATCCGCATGCATATCATCTCCGCCTAATGGGCCGTACAATAATTCATGGCCTGCTCAGACGTTGTCCCCCTTGCCAAAAC  
AGCTTTCCATGCCTGTACAATTGCCAACTCCTACCTCAATATCGGGCTCTCCGTTGCCTCCACCTTCTGTGGTTATATCCTCAGAGTACGTTGAGCCGATTCTTGATACACC  
GCTGGTCAAGGACGAATCGACTTTCTCTCCCCAACCCCAAGAACCTACTGAGCCTCCACCGCCCTCGCCGCCACCGCCTTCCTCGCCGCCGAAAGAGGATGCTATGTT  
TATGCCCTCAGTTGAGACTACGCTGGAAGCTATGGACAGATCGCCGACACCCAAAAGCCCTGTTTCTACGACATCCCGGATTTCTCGGAGCTCTCCTAGCTCCTTCGTA  
GTATGGTCTCGCAAGCCCCGAGATCCTTCAAATCGGTGGGAGTCGCTATCTCGTCCAGAGCGCATCCACCTGCGAATATCATTGACGACGCTATGGACTTACCCACAC  
CGCCTTCATCTCCAAAACAACGGCCAAAAGATATCACTATTTCTCGTCCGCTCCCGTCAGTTCCACAGTCGAAATTTCTCCGGAAGCTGTCCAGGTTTCCTTCGTCTCT  
GCTACAGAGACGACACCTCCGAGCTCTATGGCGCCAGATACCCCAGTCCCTAGTTCTCCGCTGTCCAGTCATACATCGGTCTCAGTTGCTGCTACGCCAGCATCACAA  
GCAACGAGACTAAACAGGGCCTATCTGCGCCAGCGCACGTTGCGCAAGAGCAGCCAAAGTCGAACGAGTCAGTTTCTGTCGTTGTAGAAGGTTGAAAGATGCCGCG  
ATTCCCCCCTGCAGCCTGCCATGGAGGCAGCTGCAACTGCTTCAGTCGCCCCGGCGGCGGAAGTCAAGCCTGCGCCGCCAGTCAAGAAGTCGTGGGCTTCCCTCTTG  
CAGCCATCTGGTGTCTGCCTCCTCATCCAACTCGCGTTTGCCGACTTCATCAGTCGTGCGGTTCTCCATTCCAGCTGGCCTGCAGAACGGCACCTCCAAACAGTCTACTTC  
GTCTCCAGCAGGCACCGTGCGCCCCGAGCTGCTCAACCTGATCAATGTCCGTCCCACGGGATACTTTGCGCCACCAAAGATTTCGTCCCCGCGGACTTGTCAATACCGG  
AAACATGTGCTTTGCAAATGCCGTGTTGCAGATCCTGGTCTACTGCCAGCCGTTCTACCGTCTGTTCACTGAGGTGGGGAAGTTTATCGGCGAACAAGGTTTCCTCGAAA  
GACGAACCCAATGCGACGCCGCTCGTGACGCGATCATTAGTTCTGAAGGAGTTTGCGCCCAAAGAGCCGGAGTTTGACCCTAGATCGAAAGGCAAGGAGAGGC  
AGGAAGATTTTCGACGATCTCGACTCTTTCATTCCAACGTATGTATACGACGTGTTGAAAGAAAAGAAGCGTTTCGCCAGTATGGTGGGCGGACATCAAGAAGATGCTG  
AAGAATTCTTGGGCTTTTTTCTTGACACCCTGGAGGACGAGCTACTTTCCCTCTCTCAGGCGCCGTCTTCTGTAAAGGAGAAGGAGTCACAAGAAAACGTACCGGACG  
ATGAATGGATGGAAGTCGGAAAACGCAATCGTTTGGTCTCGACGCGTACCGCCAAAAGCACTGAGTCTCCTATTACACGGATCTTTGGTGGCAAGTTCCGCTCGACAC  
TGAAGGCTCCACATCAAAGAGACTCCGTCACTGTAGAAGACTGGCGTTCGCTGCGACTGGATATCCAGCGCGAGCAAGTGCACACCATTAGGACGCATTGCAGTTC  
ATCTCCGCGCCGATTCCGGTAGAGATCACCTCGCCGACACGTCCTGGTGCCATCATCGAAGCCAGCCGACAAGAGCTCATTGAGAACTTACCCCCGGTCTCCTCGTTCTCC  
ACCTAAAACGCTTCTTATACGATACGAACGTCGGCGACGTCGTGAAACTCGGGAAGCACGTTACCTTTGGACCTGACCTTGAAATCGGCTCTGACTTATTGACCCCGAC  
GCGTCGTACATTACATCCCGTGAAGTATCAGCTCTTTGGAGCATTGTACCACCACGGACAATCTGCATCCGGTGGTCATTACACGCTGGATGTTCTGCACCCTAATCGCG  
AAATGAACGACCGGCCACGGCAAGCTTGGATACGCATTGACGACGAGCTGGTATCCGACGTACGTCCCGAGGACGTCTTCGGCGACCAGGAACGGGACGACCGCTGT  
GCATACCTGCTCTTCTACCGACGACTAGGTCCCGCGAAGACGTGGTCATCGGCCGCGTCGTAG

>Lachesis\_group0\_\_13\_contigs\_\_1.g10392

ATGTCGCGCGCCGAAAAGATTCGCGGAAAGGTCTTTGGCGGTGGTGACAAGGCCGCCGCCCCAGACGACGACGCCTCCGTTTCTCGTTCTCCAGATGCTCCCCTCACC  
ATCAGCATCCCTAAGCCACCTCCAACCCAGCCCGCTCCTCCCCAAAAGTCTAAGCAATCCGACTCGTCGCCCGGACCTGCTGCCGACGCTCAACAGAGGGACGACAA  
GTGCTTCCGCGAGCGACTTATCCACCGCCTCGGTGAAGACTACAACGGTGCTGAGCGTTACAGGCTGTCTCAGGATGCCCCGAAAGACTTGCATTGGAAGCGTTGGGG  
TCCCTATTTGAGCGACCGTCAATGGGCAACTGTCCGGGAAGATTATTCTGCTGACGGGGACGCCTGGTCCCATTTCCCTCACGATCACGCCCGTTCTCGCGCGTACCGTT  
GGGGTGAAGACGGTATCGCAGGCATCTCCGACAACCATCAACGCTTATGTCTTGCCCTTTCGCTTTGGAACGGCGAAGACCCTATCCTTAAGGAGCGCTTCTTCGGCGT  
GACTGGCCACCAAGGCAATCACGGCGAGGACGTGAAGGAGCTCTATTATTACCTAGACTCAACGCCGACCCACTCGTACATGAAATTCTTGTAACAAATACCCTCAGAG  
GCGTTATCCTTACGAACAGCTCGTAAGGGAGAACGCGAACCGCGGGCGCGATGTTCCCGAATTCGAGATCTTAGACACCGACGCCTTCGATGACGATCGTTATTGGGAT  
ATCTTTGTCGAGTATGCGAAGGATGAACAGAATCCCGAGAACATACACATGCGTATCACTACCTACAACCGCGGGCCGGAACCCGCCACGCTGCACGTCATCCCACAA  
TTGTGGTTCCTAACTCCTGGTCATGGGACCAGGACCACCTCCAAAACCATCCATGTATGCGTCTGGCGACGGGGTGATTACTGCGAAACACGAGACGCTAGGACAA  
TACCATCTATACTGCATACCATCCCCGCCGCCAGTTGATTCTCAGGGCGAGGAAGTCACCTCAGAGACGGATATGATCCAGCCGGAATTGCTCTTCACGGAGAACAACA  
CAAACCTACCACCGATTGTATGGAGGTCAGAACGATACACCATACGTGAAGGATGGCTTCCATGACCACATTGTTCCGTCTCATCGGCCCCCTGCCCGGAAGAGGAGG  
ATGAAAAGGGGTACTTTATGTCCAGAATACATTCTCAGACGAGTCCTCATCGCACAGTTCCTCTGGCGTAGACGAATCGGAGACACCGCCTAACGAGCGTGAACAAG  
GTCCTCGCACTCCATTCCCGGGGCCCTACCTTCGTGAACCCAGAGAAGAAGGGGACGAAGGCGGCTGCACATTACACCTTCGCGATGTGCCCCCGCGCGGTGGATGTG  
CAGTTGCACGCTTGACGCTGACACCCGTGGGCCAGAGGAGAACACGACCGTCGAGGATGAGGGCATCTTCGATGATACGGTCGAGGAAAGACGGGAGGAGGCGGA  
TGAATTCTACGCACAGCTTGTCGCCCGGACCCATCAGTGACGACTTCAGGCAGATTATGCGACAGGCGTTCCGGTGAATGTTGTGGACGAAGCAGTACTACCAATTCGTC  
CAGAAGACCTGGATCGAGGGTGACCCGGCGCAGCCGCCCCGCCACCTGAGAGGAAGTGGATTTCGTAACAAGGATTGGAAGCATCTTTACATTGCGGACATTCTGTC  
CATGCCGGATAAATGGGAATACCCGTTCTTCGCTGCTTGGGATACCGCATTCCACTGCATTCCCCTTGCCGTCGTCGACCCGGCATTGCAAAGAGGCAGCTCGATCTAC  
TCACTCGCGAGTGGTACATGAAGCCCGACGGACAGATTCCCGCATAACGAATGGAACCTTCGGAGATGTTAACCTCCGGTCCACGCCTGGGCGACTTTCGCTGTGTTCA  
AGATCGAGCGCAAGGTGCACGGTGTAGAGGATTTGCCGTTCTTGAGCGTGTATTCCAGAAGCTCCTGTTGAACTTTACGTGGTGGGTCAATCGTAAGGATGCAGGCG  
GTAACAATGTCTTTGAGGGTGGATTCTTGCGTTGGATAACATCGGCGTGTTCACCGCTCGGAGCCCCCTTCTACCGGCGGTGCTTTACGTCAAGCTGACGGTACGGC  
CTGGATGGCATTCTACTGCCTGAACATGCTGAATATCGCCCTGAACTCGCCAAACACAACCCTGTGTACGAGGACATTGCGTCCAAGTTCTTCGAGCACTTCATCTTCA

TCTCTGATGCAATGACCTACCGCTCTGGCGAGGATGAAGTCAGCCTTTGGAACGAGCAGGACGGCATGTACTACGACGCCATTGAATTTGGACCCGGCAACACAATGC  
AGCTTCCTGTACGCAGCTTAGTTGGTCTCATCCCTCTCTATGCCACTCTCGTCCTCGAGCCCTCGGTCATCAACAAGCTACCGGGCTTCAAGAAACGTATGGAGTGGTTC  
ATCGAGAACCGGCCTGAGATTCGGAGCGCACAATGGCCAACATGAAAGTGAAGGGCCGTGGCGAGCGGCGGCTGCTGGCGTTGGCGAGTAAAGAACGGTTGATCA  
GCATCTTGGAGAAAATGCTTGACGAAGACGAGTTCTTCAGCGAACACGGCATTTCGCTCGCTGTCTGAAGAAGCACAAAGATCAGCCGTGGGGTATCGATGTTACGGG  
GAGCACTACGAGGTCAACTACTGGCCCGGCGACTCGATGTCCGGCATGTTTCGGTGGCAACTCCAAGTGGCGTGGTTCCTATCTGGCTGGCCGTGAACTTCCTGTTGATAG  
AGTCTCTCCAAAGATTCTACCAGTACTACGGAGACGAGGTCCAGGTAGAATGCCCAACCGGCAGTGGGGATTACATGAACCTCGCAAACGTCGCTGAAGAGATCCAG  
CACCGCATCATCCACATTTTCGGACGTGACCGTGAGGGTAAGCGGGCAACGAACGGTGGTAATGTCAAGCTGGACCGTGACCCGCACTTCCGTGACTACGTCTGGTTC  
TATGAGTTCTTCCACGCTGACGATGGGCGCGGTCTTGGAGCATCGCACCAGACCGGCTGGTCTGGCCTCGTCGCGTACCATATCCTGCAGAGCGGGGCCAGCTGCCGTC  
TTCCAAAGACACCAAAGACTCCTCGCAGCGTCGTCAACCACTACTTTGATGAAACGATGTCCGCATACGGAGATGGTGCAGAGTCTGCTTACAGCGCATATAGCGCAG  
CAGACCACAACACCCTCGGAGACATTTGCCCGGATGCCTTGTAG

>Lachesis\_group0\_\_13\_contigs\_\_l.g8359

ATGGCCACACTCGAAGGCAAGAAGATCGTCATCATCGGCGGCTCGTCTGGCATAGGCTACTCCGTGGCCAAGGCCTCCCTGCTCAACCTCGCGGGACACGTCTCTGTC  
GCGTCGTCCTCGAAAGCGAAGGTTCGACGCAGCGATCACACGCCTTCTCGCGGAGCCCGCGTTGAAGGCACACTCACCCCAAGGACGCGTTAGCGGAGACGTCTGTTG  
ACCTCAAGGACACGCAGAACGTCGCGCGGTTCTTCGAGAAAATCGGCGAGATCGACCACCTCATCATCACCAGCGGCAGCATTGCGCGCACCATCGACTTCCGTACC  
GAGGACCTGAGCAAGCACAGAGACGCTTTCGACGTTAGGTTCTGGGGCGCGGCCGTCGCTGCACAGAAGGCGAAAATCATGGAGGGAGGATCCATTACGTTACCAT  
CGGCGGCGCTTTGTTGACACCCGCACCCACCTGGTCGCTCATCGTTAGCGCTATCGGTGCCGTCGACGCCCTCACGCGTTCTCTCGCTATCGAACTCGCCCCGTTACGCG  
TGAATGTTGTCAGCCCAGGTGCCGTCGATACGGAGCTCTGGGATGGTTTCTCGGAAGACGCGAAGGCCAAGACGCTTGCCGGATATGCTGCAAAGCTGCCCCGTCAAGC  
ACGTCGCTGGACCTGATGAAATTGCCGAGGCGTATCTCTTCTCATGAAAAAAGCGGCGGAAGCGAGGGCGATCTTTGGGAAGTGCCGGAGATGGCTATTGCCTTCG  
TACGACTCGGTACTGCTTTGATTAACGAGGTATGA

>Lachesis\_group0\_\_13\_contigs\_\_l.g6290

ATGGAGGACGAGGTCGTCGCTCTCGTTATCGACAATGGCTCTGGAATGTGCAAGGCTGGATTTGCTGGTGACGATGCTCCTCGCGCAGTCTTCCCATCCATCGTCGGTC



CCCCTCGCCACCAGGGTGTAATGGTTGGAATGGGTCAGAAGGACTCATACGTTGGTGATGAGGCTCAGTCGAAGCGTGGTATCCTCACGCTCAAGTACCCCATCGAGC  
ACGGTATCGTCACCAACTGGGACGACATGGAGAAGATCTGGCATCACACCTTCTACAACGAGCTCCGTGTGCGACCTGAGGAGCACCCAGTGCTGCTCACGGAGGCC  
CCGTTGAACCCCAAGGCTAACCGTGAAAAGATGACACAGATCATGTTGAGACGTTCAATGCGCCAGCGTTCTACGTCGCGATTCAAGGCTGTGCTCTCGCTTTACGCGT  
CCGGTCGTACGACTGGTATCGTTCTCGACTCCGGTGATGGTGTCTCTCACACTGTGCCCATCTACGAGGGTTTCGCACTGCCGCACGCCATCCTCCGTCTTGATCTCGCC  
GGTCGTGACATCACAGACTTGCTCGTCAAGAACCTGATGGAGCGCGGTTACCCCTTCAACACTACGGCCGAGCGCGAAATTGTCCGTGACATCAAGGAGAAGCTTTGC  
TATGTTGCTCTCGACTTCGAGCAGGAGCTCCAGACCGCCGCACACTCGTCTGCCATCGAGAAGTCCTACGAATTGCCCCACGGTCAGGTCATCACCATCGGCAACGAG  
CGGTTCCGTGCCCCTGAGGCGCTCTTCCAGCCCGCCTTCTCGGACTTGAGGCTGCCGGTGTCCATGAGACGACCTACAACTCCATCTACAAGTGTGATCTCGATATTG  
TCGTGATCTCTACGGCAACATCGTCCTTTCTGGCGGTACTACCATGTTCCCTGGTATTGCTGACCGTATGCAGAAGGAGCTCACCGCTCTTGCGCCCTCGAGCATGAAG  
TCAAGATCGTCGCTCCTCCCGAGAGGAAGTACTCCGTCTGGATTGGTGGTTCTATCCTCGCGTCGCTCTCCACGTTCCAGAACCTCTGGTGCTCCAAGCAGGAGTATGA  
CGAGTCAGGCCCTGGTATCGTTCACCGCAAGTGCTTCTAA
